# Supplementary material for: Drought stress triggers proteomic changes involving lignin, flavonoids and fatty acids in tea plants
Source: PubMed Central journal article supplement (PMC7511325; doi:10.1038/s41598-020-72596-1), 2020-09-23
Supplement: 41598_2020_72596_MOESM1_ESM.pdf [file 41598_2020_72596_MOESM1_ESM.pdf]

---

### Drought Stress Triggers the Proteomic Changes Involved in Lignins, Flavonoids and Fatty Acids in Tea Plants

Honglian Gu<sup>1</sup>, Yu Wang<sup>1</sup>, Hui Xie<sup>1</sup>, Chen Qiu<sup>1</sup>, Shuning Zhang<sup>1</sup>, Jun Xiao<sup>2</sup>, Hongyan Li<sup>3</sup>, Liang Chen<sup>4</sup>, Xinghui Li<sup>5</sup>, Zhaotang Ding<sup>1,\*</sup>

<sup>1</sup> Tea Research Institute, Qingdao Agricultural University, Qingdao, Shandong266109, China.

<sup>2</sup> School of Biological Science and Winery Engineering, Taishan University, Taian, Shandong271000, China.

<sup>3</sup> Haiyang fruit technology promotion station, Yantai, Shandong265100, China.

<sup>4</sup> Tea Research Institute, Chinese Academy of Agricultural Sciences, Hangzhou, Zhejiang310008, China.

<sup>5</sup> Tea Research Institute, Nanjing Agricultural University, Nanjing, Jiangsu210095, China.

guhongliantea@163.com (H.G.); wangyutea@163.com (Y.W.); xiehuitea@163.com (H.X.); qiuchentea@163.com (C.Q.);

zhangshuningtea@163.com (S.Z.); xiaojun8299@163.com (J.X.); sunmijia0710@163.com (H.L.); liangchen@tricaas.com (L.C.);

lxh@njau.edu.cn (X.L.).

\*Correspondence: dzttea@163.com; Tel: +85-15853260396

---

**Supplementary Table S1. MS/MS spectrum database search analysis summary**

| Total spectrums | Matched spectrums | Peptides | Unique peptides | Identified proteins | Quantifiable proteins |
|-----------------|-------------------|----------|-----------------|---------------------|-----------------------|
| 244124          | 51213             | 25805    | 23854           | 4789                | 4242                  |

---

**Table 2. Differentially expressed protein summary (Filtered with threshold value of expression fold change and P value < 0.05)**

| Compare group | Regulated type | fold change >1.5 |
|---------------|----------------|------------------|
| DT/CK         | up-regulated   | 11               |
|               | down-regulated | 100              |

---
