# Supplementary material for: Drought stress triggers proteomic changes involving lignin, flavonoids and fatty acids in tea plants
Source: PubMed Central journal article supplement (PMC7511325; doi:10.1038/s41598-020-72596-1), 2020-09-23
Supplement: 41598_2020_72596_MOESM2_ESM.pdf [file 41598_2020_72596_MOESM2_ESM.pdf]

## Drought Stress Triggers the Proteomic Changes Involved in Lignins, Flavonoids and Fatty Acids in Tea Plants

Honglian Gu<sup>1</sup>, Yu Wang<sup>1</sup>, Hui Xie<sup>1</sup>, Chen Qiu<sup>1</sup>, Shuning Zhang<sup>1</sup>, Jun Xiao<sup>2</sup>, Hongyan Li<sup>3</sup>, Liang Chen<sup>4</sup>, Xinghui Li<sup>5</sup>, Zhaotang Ding<sup>1,\*</sup>

1 Tea Research Institute, Qingdao Agricultural University, Qingdao, Shandong266109, China.

2 School of Biological Science and Winery Engineering, Taishan University, Taian, Shandong271000, China.

3 Haiyang fruit technology promotion station, Yantai, Shandong265100, China.

4 Tea Research Institute, Chinese Academy of Agricultural Sciences, Hangzhou, Zhejiang310008, China.

5 Tea Research Institute, Nanjing Agricultural University, Nanjing, Jiangsu210095, China.

guhongliantea@163.com (H.G.); wangyutea@163.com (Y.W.); xiehuitea@163.com (H.X.); qiuchentea@163.com (C.Q.); zhangshuningtea@163.com (S.Z.); xiaojun8299@163.com (J.X.); sunmijia0710@163.com (H.L.); liangchen@tricaas.com (L.C.); lxh@njau.edu.cn (X.L.).

\*Correspondence: dztea@163.com; Tel: +85-15853260396

**Supplementary Table S2. Protein annotation**

| Protein accession                 | Protein description                          | MW [kDa] | Score  | Coverage [%] | Peptides | PSMs | Unique peptides | CK1   | CK2   | CK3   | DT1   | DT2   | DT3   | DT/CK Ratio | DT/CK P value |
|-----------------------------------|----------------------------------------------|----------|--------|--------------|----------|------|-----------------|-------|-------|-------|-------|-------|-------|-------------|---------------|
|                                   | PREDICT ED:                                  |          |        |              |          |      |                 |       |       |       |       |       |       |             |               |
| cds.CL102<br>Contig1_m<br>.19364  | elongation factor 1-alpha<br>[Juglans regia] | 49.307   | 98.797 | 40           | 20       | 83   | 14              | 0.987 | 0.966 | 0.967 | 1.004 | 1.016 | 1.028 | 1.044       | 1.18E-02      |
|                                   | PREDICT ED:                                  |          |        |              |          |      |                 |       |       |       |       |       |       |             |               |
| cds.CL103<br>0Contig1_<br>m.1728  | myosin-11<br>[Jatropha curcas]               | 121.45   | 7.0306 | 3.7          | 4        | 4    | 4               | 1.026 | 1.075 | 1.026 | 0.93  | 0.953 | 0.984 | 0.917       | 1.83E-02      |
| cds.CL105<br>3Contig1_<br>m.23076 |                                              | 46.32    | 10.38  | 13.5         | 5        | 5    | 5               | 0.985 | 0.956 | 0.974 | 1.037 | 1.022 | 1.068 | 1.073       | 1.09E-02      |







| PREDICTED:                |                                                                                         |        |        |     |   |   |   |       |       |       |       |       |       |      |          |
|---------------------------|-----------------------------------------------------------------------------------------|--------|--------|-----|---|---|---|-------|-------|-------|-------|-------|-------|------|----------|
| cds.CL1290Contig1_m.20447 | phospholipase SGR2-like<br>[Nicotiana tabacum]<br>Myc2                                  | 22.067 | 9.9686 | 9.5 | 1 | 1 | 1 |       |       |       |       |       |       |      |          |
| cds.CL1310Contig1_m.8622  | bHLH protein<br>[Vitis vinifera]<br>PREDICTED: ATP-dependent zinc metalloprotease       | 68.241 | 1.1529 | 1.8 | 1 | 2 | 1 | 0.901 | 0.962 | 0.958 | 1.126 | 1.026 | 1.064 | 1.14 | 1.90E-02 |
| cds.CL131Contig2_m.19755  | FTSH 11, chloroplastic/mitochondrial isoform X1<br>[Sesamum indicum]<br>PREDICTED: AP-1 | 57.774 | 11.676 | 9.1 | 4 | 4 | 4 |       |       |       |       |       |       |      |          |
| cds.CL1334Contig1_m.16732 | complex subunit mu-2<br>[Nelumbo nucifera]                                              | 45.632 | 5.5313 | 6.5 | 3 | 4 | 3 | 0.96  | 1.021 | 1.044 | 1.017 | 0.972 | 0.944 | 0.97 | 4.06E-01 |

|                                   |                                                                                                                                                     |        |        |      |    |    |    |       |       |       |       |       |       |       |          |
|-----------------------------------|-----------------------------------------------------------------------------------------------------------------------------------------------------|--------|--------|------|----|----|----|-------|-------|-------|-------|-------|-------|-------|----------|
|                                   | PREDICT<br>ED:<br>crocetin                                                                                                                          |        |        |      |    |    |    |       |       |       |       |       |       |       |          |
| cds.CL134<br>0Contig1_<br>m.43986 | glucosyltra<br>nsferase,<br>chloroplast<br>ic-like<br>[Nelumbo<br>nucifera]                                                                         | 26.525 | 5.3964 | 13.2 | 3  | 3  | 3  | 0.943 | 1.056 | 0.978 | 0.986 | 1.025 | 1.027 | 1.02  | 5.86E-01 |
|                                   | PREDICT<br>ED:                                                                                                                                      |        |        |      |    |    |    |       |       |       |       |       |       |       |          |
| cds.CL135<br>7Contig1_<br>m.25269 | heparanase<br>-like<br>protein 3<br>[Ziziphus<br>jujuba]                                                                                            | 22.003 | 10.872 | 11.9 | 2  | 2  | 2  | 1.097 | 1.037 | 1.069 | 0.921 | 0.967 | 0.894 | 0.869 | 7.34E-03 |
|                                   | PREDICT<br>ED: 4-<br>hydroxy-3-<br>methylbut-<br>2-en-1-yl<br>diphosphat<br>e synthase<br>(ferredoxin<br>)<br>chloroplast<br>ic [Vitis<br>vinifera] |        |        |      |    |    |    |       |       |       |       |       |       |       |          |
| cds.CL136<br>7Contig1_<br>m.12959 |                                                                                                                                                     | 85.391 | 198.51 | 29.1 | 20 | 40 | 20 | 1.02  | 1.081 | 1.026 | 0.934 | 0.941 | 0.963 | 0.908 | 9.38E-03 |
|                                   | PREDICT<br>ED: UDP-<br>glycosyltra<br>nsferase<br>708A6-<br>like<br>[Ziziphus<br>jujuba]                                                            |        |        |      |    |    |    |       |       |       |       |       |       |       |          |
| cds.CL137<br>1Contig1_<br>m.20317 |                                                                                                                                                     | 55.498 | 1.9449 | 3.4  | 2  | 2  | 2  | 1.291 | 1.277 | 1.364 | 0.711 | 0.649 | 0.62  | 0.504 | 1.04E-04 |







|           |                                                                                                                                                                                                                                                         |        |        |      |    |    |    |       |       |       |       |       |       |       |          |
|-----------|---------------------------------------------------------------------------------------------------------------------------------------------------------------------------------------------------------------------------------------------------------|--------|--------|------|----|----|----|-------|-------|-------|-------|-------|-------|-------|----------|
| cds.CL145 | transferrin<br>g glycosyl<br>group<br>transferase<br>[Medicago<br>truncatula]<br>PREDICT<br>ED:<br>carboxyl-<br>terminal-<br>processing<br>peptidase                                                                                                    | 19.324 | 3.9875 | 7.3  | 1  | 2  | 1  | 0.985 | 1.043 | 0.991 | 0.988 | 1.04  | 0.964 | 0.991 | 7.66E-01 |
| cds.CL147 | 2,<br>chloroplast<br>ic-like<br>isoform<br>X2<br>[Juglans<br>regia]<br>PREDICT<br>ED:<br>conserved<br>oligomeric<br>Golgi<br>complex<br>subunit 2<br>[Ricinus<br>communis]<br>PREDICT<br>ED:<br>cinnamoyl<br>-CoA<br>reductase<br>1<br>[Ipomoea<br>nil] | 37.106 | 72.742 | 35.9 | 11 | 15 | 10 | 1.007 | 1.021 | 0.968 | 1.017 | 0.951 | 1.003 | 0.992 | 7.59E-01 |
| cds.CL148 | 8Contig1_<br>m.8339                                                                                                                                                                                                                                     | 83.986 | 3.4794 | 2.5  | 2  | 2  | 2  | 0.93  | 1.126 | 1.024 | 0.976 | 0.986 | 0.968 | 0.951 | 4.87E-01 |
| cds.CL149 | 6Contig1_<br>m.28002                                                                                                                                                                                                                                    | 40.663 | 18.225 | 17.8 | 7  | 14 | 7  | 0.947 | 0.967 | 0.958 | 1.035 | 1.043 | 1.024 | 1.08  | 6.64E-04 |

|                           |                                                                             |        |        |      |   |    |   |       |       |       |       |       |       |       |          |
|---------------------------|-----------------------------------------------------------------------------|--------|--------|------|---|----|---|-------|-------|-------|-------|-------|-------|-------|----------|
| cds.CL1507Contig1_m.34653 | PREDICTED:<br>elongation factor 1-delta-like [Daucus carota subsp. sativus] | 25.236 | 56.763 | 46.4 | 9 | 27 | 7 | 0.95  | 0.957 | 0.961 | 1.045 | 1.075 | 1.049 | 1.105 | 4.61E-04 |
| cds.CL1528Contig1_m.12829 | PREDICTED:<br>uridine-cytidine kinase C isoform X1 [Jatropha curcas]        | 74.6   | 19.08  | 11.7 | 7 | 8  | 7 | 0.998 | 1.011 | 0.985 | 1.024 | 0.988 | 0.985 | 1.001 | 9.54E-01 |
| cds.CL1535Contig1_m.21159 | PREDICTED:<br>5'-nucleotidase SurE-like [Prunus mume]                       | 32.59  | 4.3828 | 2.9  | 1 | 1  | 1 | 1.008 | 0.937 | 0.999 | 0.985 | 0.979 | 1.101 | 1.041 | 4.27E-01 |
| cds.CL1559Contig1_m.17467 | phosphoglycerate kinase [Medicago truncatula]                               | 50.321 | 9.5714 | 2.2  | 1 | 1  | 1 | 0.909 | 1.027 | 1.061 | 0.951 | 1.044 | 1.024 | 1.007 | 8.82E-01 |

|                                   |                                                                                                         |        |        |      |    |    |    |       |       |       |       |       |       |       |          |
|-----------------------------------|---------------------------------------------------------------------------------------------------------|--------|--------|------|----|----|----|-------|-------|-------|-------|-------|-------|-------|----------|
| cds.CL156<br>1Contig1_<br>m.17435 | PREDICT<br>ED:<br>palmitoyl-<br>protein<br>thioesteras<br>e 1<br>isoform<br>X1<br>[Theobrom<br>a cacao] | 41.191 | 2.4941 | 4.3  | 2  | 2  | 2  | 1.039 | 1.101 | 1.046 | 0.942 | 0.948 | 0.915 | 0.88  | 3.96E-03 |
| cds.CL157<br>3Contig1_<br>m.5993  | PREDICT<br>ED:<br>coatomer<br>subunit<br>gamma-2<br>[Jatropha<br>curcas]                                | 103.23 | 98.108 | 21.5 | 17 | 22 | 17 | 1.007 | 0.99  | 1.025 | 0.989 | 1.012 | 1.01  | 0.996 | 7.87E-01 |
| cds.CL157<br>4Contig1_<br>m.10547 | PREDICT<br>ED:<br>leucine--<br>tRNA<br>ligase,<br>cytoplasmic-like<br>[Solanum<br>pennellii]            | 87.197 | 44.376 | 20.2 | 13 | 15 | 8  | 0.947 | 0.99  | 0.973 | 0.993 | 1.053 | 1.018 | 1.053 | 7.36E-02 |
| cds.CL159<br>3Contig1_<br>m.10476 | PREDICT<br>ED: dnaJ<br>homolog<br>subfamily<br>C member<br>16<br>[Jatropha<br>curcas]                   | 74.663 | 6.9919 | 3.6  | 2  | 2  | 2  | 0.904 | 1.105 | 1.147 | 0.941 | 1.011 | 0.902 | 0.904 | 3.00E-01 |



|                                   |                                                                                   |        |        |      |    |    |    |       |       |       |       |       |       |       |          |
|-----------------------------------|-----------------------------------------------------------------------------------|--------|--------|------|----|----|----|-------|-------|-------|-------|-------|-------|-------|----------|
|                                   | PREDICT<br>ED:<br>plasma<br>membrane                                              |        |        |      |    |    |    |       |       |       |       |       |       |       |          |
| cds.CL164<br>Contig1_m<br>.696    | ATPase 4<br>isoform<br>X1<br>[Theobroma<br>cacao]                                 | 105.14 | 131.71 | 35.3 | 31 | 66 | 12 | 1.021 | 0.977 | 1.032 | 0.986 | 1.011 | 0.998 | 0.988 | 5.66E-01 |
|                                   | PREDICT<br>ED:<br>photosynthetic<br>NDH                                           |        |        |      |    |    |    |       |       |       |       |       |       |       |          |
| cds.CL164<br>Contig1_m<br>.698    | subunit of<br>lumenal<br>location 5,<br>chloroplast<br>ic<br>[Ziziphus<br>jujuba] | 28.353 | 99.231 | 36   | 11 | 39 | 9  | 1.044 | 1.022 | 1.043 | 0.986 | 0.96  | 0.976 | 0.94  | 4.02E-03 |
|                                   | PREDICT<br>ED: CBS<br>domain-<br>containing<br>protein                            |        |        |      |    |    |    |       |       |       |       |       |       |       |          |
| cds.CL167<br>0Contig1_<br>m.28637 | CBSX1,<br>chloroplast<br>ic-like<br>isoform<br>X3<br>[Nicotiana<br>attenuata]     | 30.077 | 18.033 | 13.4 | 5  | 9  | 4  | 1.037 | 1.014 | 1.041 | 0.996 | 1     | 0.963 | 0.957 | 3.85E-02 |

|           |                                                                                            |        |        |      |   |   |   |       |       |       |       |       |       |       |          |
|-----------|--------------------------------------------------------------------------------------------|--------|--------|------|---|---|---|-------|-------|-------|-------|-------|-------|-------|----------|
| cds.CL167 | PREDICT<br>ED:<br>multiprotein-bridging factor 1b [Vigna radiata var. radiata]             | 15.516 | 21.061 | 27.5 | 6 | 8 | 6 | 1.069 | 1.089 | 1.065 | 0.905 | 0.884 | 0.958 | 0.852 | 2.96E-03 |
| cds.CL168 | PREDICT<br>ED:<br>ribonuclease J isoform X1 [Theobroma cacao]                              | 93.003 | 3.7114 | 4    | 4 | 5 | 3 | 1.215 | 1.183 | 1.09  | 0.843 | 0.809 | 0.809 | 0.706 | 6.01E-04 |
| cds.CL171 | PREDICT<br>ED: serine carboxypeptidase-like 20 [Citrus sinensis]                           | 55.629 | 14.729 | 6    | 3 | 5 | 3 | 1.133 | 1.081 | 1.074 | 0.893 | 0.905 | 0.888 | 0.817 | 3.41E-04 |
| cds.CL172 | PREDICT<br>ED:<br>regulator of nonsense transcripts 1 homolog isoform X1 [Malus domestica] | 70.475 | 43.035 | 9.1  | 5 | 5 | 5 | 0.995 | 0.986 | 0.95  | 1.022 | 1.06  | 1.012 | 1.056 | 5.36E-02 |



















|                           |                                                                                    |        |        |      |    |    |    |       |       |       |       |       |       |       |          |
|---------------------------|------------------------------------------------------------------------------------|--------|--------|------|----|----|----|-------|-------|-------|-------|-------|-------|-------|----------|
| cds.CL2709Contig1_m.35266 | PREDICTED:<br>proteasome subunit alpha type-4 [Daucus carota subsp. sativus]       | 27.283 | 115.11 | 38.6 | 11 | 23 | 11 | 0.963 | 0.944 | 1.003 | 1.026 | 1.025 | 1.068 | 1.072 | 3.61E-02 |
| cds.CL2719Contig1_m.26532 | PREDICTED:<br>tobamovirus multiplication protein 2A-like [Gossypium hirsutum]      | 31.186 | 19.5   | 19.7 | 3  | 7  | 3  | 0.927 | 0.926 | 0.934 | 0.999 | 1.079 | 1.114 | 1.145 | 5.35E-02 |
| cds.CL2759Contig1_m.27804 | PREDICTED:<br>reticulon-4-interacting protein 1, mitochondrial [Nicotiana tabacum] | 16.774 | 51.014 | 21.3 | 3  | 5  | 3  | 0.959 | 0.993 | 1.001 | 1.024 | 1.059 | 1.013 | 1.048 | 6.53E-02 |
| cds.CL2759Contig1_m.27806 | PREDICTED:<br>reticulon-4-interacting protein 1, mitochondrial [Ziziphus jujuba]   | 12.937 | 48.968 | 18.3 | 2  | 2  | 2  | 0.942 | 0.944 | 0.981 | 1.121 | 1.046 | 0.997 | 1.104 | 5.56E-02 |







|                                   |                                                                                                        |        |        |      |   |    |   |       |       |       |       |       |       |       |          |
|-----------------------------------|--------------------------------------------------------------------------------------------------------|--------|--------|------|---|----|---|-------|-------|-------|-------|-------|-------|-------|----------|
|                                   | PREDICT<br>ED:                                                                                         |        |        |      |   |    |   |       |       |       |       |       |       |       |          |
| cds.CL289<br>9Contig1_<br>m.9257  | probable<br>polygalact<br>uronase<br>[Malus<br>domestica]                                              | 33.787 | 3.5492 | 5.7  | 2 | 2  | 2 | 1.068 | 0.988 | 1.038 | 0.928 | 1.003 | 0.968 | 0.937 | 1.11E-01 |
|                                   | PREDICT<br>ED: 6-<br>phosphofr<br>ucto-2-<br>kinase/fruc<br>tose-2,6-<br>bisphosph<br>atase<br>[Vitis] |        |        |      |   |    |   |       |       |       |       |       |       |       |          |
| cds.CL28<br>Contig1_m<br>.10182   | ucto-2-<br>kinase/fruc<br>tose-2,6-<br>bisphosph<br>atase<br>[Vitis]                                   | 55.994 | 7.6735 | 13.4 | 7 | 9  | 3 | 1.077 | 1.012 | 1.023 | 0.982 | 1.012 | 0.971 | 0.953 | 1.02E-01 |
|                                   | PREDICT<br>ED: 6-<br>phosphofr<br>ucto-2-<br>kinase/fruc<br>tose-2,6-<br>bisphosph<br>atase<br>[Vitis] |        |        |      |   |    |   |       |       |       |       |       |       |       |          |
| cds.CL28<br>Contig4_m<br>.11804   | ucto-2-<br>kinase/fruc<br>tose-2,6-<br>bisphosph<br>atase<br>[Vitis]                                   | 61.645 | 57.006 | 17.9 | 9 | 11 | 4 | 0.979 | 1.038 | 1.029 | 1     | 1.01  | 0.955 | 0.973 | 3.44E-01 |
|                                   | PREDICT<br>ED:                                                                                         |        |        |      |   |    |   |       |       |       |       |       |       |       |          |
| cds.CL292<br>4Contig1_<br>m.35673 | thaumatin-<br>like<br>protein<br>[Theobrom<br>a cacao]                                                 | 31.726 | 1.9529 | 3.4  | 1 | 1  | 1 |       |       |       |       |       |       |       |          |
|                                   | PREDICT<br>ED: AP-1<br>complex<br>subunit<br>gamma-2-<br>like<br>[Citrus<br>sinensis]                  |        |        |      |   |    |   |       |       |       |       |       |       |       |          |
| cds.CL300<br>Contig2_m<br>.5020   | complex<br>subunit<br>gamma-2-<br>like<br>[Citrus<br>sinensis]                                         | 44.087 | 85.051 | 13   | 4 | 6  | 4 | 0.952 | 0.949 | 0.961 | 0.989 | 1.062 | 1.093 | 1.099 | 8.98E-02 |

|                                   |                                                                                |        |        |      |   |   |   |       |       |       |       |       |       |       |          |
|-----------------------------------|--------------------------------------------------------------------------------|--------|--------|------|---|---|---|-------|-------|-------|-------|-------|-------|-------|----------|
|                                   | PREDICT<br>ED:                                                                 |        |        |      |   |   |   |       |       |       |       |       |       |       |          |
| cds.CL303<br>4Contig1_<br>m.23283 | spermidine<br>hydroxycin<br>namoyl<br>transferase<br>-like [Vitis<br>vinifera] | 53.446 | 5.4276 | 7.2  | 3 | 3 | 3 | 1.088 | 1.049 | 1.136 | 1.032 | 0.923 | 0.907 | 0.874 | 4.38E-02 |
|                                   | PREDICT<br>ED:                                                                 |        |        |      |   |   |   |       |       |       |       |       |       |       |          |
| cds.CL308<br>0Contig1_<br>m.32184 | carboxyles<br>terase 1-<br>like<br>[Juglans<br>regia]                          | 37.081 | 7.4766 | 7.7  | 2 | 3 | 2 | 0.908 | 0.955 | 0.985 | 1.051 | 1.078 | 1.055 | 1.118 | 1.10E-02 |
|                                   | PREDICT<br>ED:                                                                 |        |        |      |   |   |   |       |       |       |       |       |       |       |          |
| cds.CL308<br>5Contig1_<br>m.12532 | endonucle<br>ase 4-like<br>[Juglans<br>regia]                                  | 12.539 | 2.1971 | 12.4 | 2 | 2 | 2 | 1.041 | 0.982 | 1.081 | 0.955 | 0.95  | 0.988 | 0.932 | 8.43E-02 |
|                                   | PREDICT<br>ED: UDP-<br>D-                                                      |        |        |      |   |   |   |       |       |       |       |       |       |       |          |
| cds.CL310<br>2Contig1_<br>m.6260  | apiose/UD<br>P-D-xylose<br>synthase 2-<br>like<br>[Nelumbo<br>nucifera]        | 43.689 | 15.068 | 14.7 | 5 | 7 | 5 | 0.98  | 1.062 | 1.111 | 0.986 | 0.928 | 0.956 | 0.91  | 8.40E-02 |

|                                   |                                                                                                                                                                                                                                                                                                                                                           |        |        |     |   |   |   |       |       |       |       |       |       |       |          |
|-----------------------------------|-----------------------------------------------------------------------------------------------------------------------------------------------------------------------------------------------------------------------------------------------------------------------------------------------------------------------------------------------------------|--------|--------|-----|---|---|---|-------|-------|-------|-------|-------|-------|-------|----------|
| cds.CL310<br>2Contig1_<br>m.6261  | PREDICT<br>ED:<br>polyadenyl<br>ate-<br>binding<br>protein-<br>interacting<br>protein 12-<br>like<br>[Sesamum<br>PREDICT<br>ED:<br>protein<br>ACCUMU<br>LATION<br>AND<br>REPLICA<br>TION OF<br>CHLORO<br>PLASTS<br>6,<br>chloroplast<br>ic [Vitis<br>vinifera]<br>PREDICT<br>ED:<br>centrosom<br>al protein<br>of 164<br>kDa<br>isoform<br>X3<br>[Arachis | 36.614 | 2.4509 | 3.9 | 1 | 1 | 1 |       |       |       |       |       |       |       |          |
| cds.CL310<br>7Contig1_<br>m.13113 | PREDICT<br>ED:<br>protein<br>ACCUMU<br>LATION<br>AND<br>REPLICA<br>TION OF<br>CHLORO<br>PLASTS<br>6,<br>chloroplast<br>ic [Vitis<br>vinifera]<br>PREDICT<br>ED:<br>centrosom<br>al protein<br>of 164<br>kDa<br>isoform<br>X3<br>[Arachis                                                                                                                  | 52.03  | 4.6955 | 3.8 | 2 | 2 | 2 | 1.036 | 1.054 | 1.128 | 0.928 | 0.981 | 0.866 | 0.862 | 2.87E-02 |
| cds.CL310<br>Contig1_m<br>.6128   | PREDICT<br>ED:<br>polyadenyl<br>ate-<br>binding<br>protein-<br>interacting<br>protein 12-<br>like<br>[Sesamum<br>PREDICT<br>ED:<br>protein<br>ACCUMU<br>LATION<br>AND<br>REPLICA<br>TION OF<br>CHLORO<br>PLASTS<br>6,<br>chloroplast<br>ic [Vitis<br>vinifera]<br>PREDICT<br>ED:<br>centrosom<br>al protein<br>of 164<br>kDa<br>isoform<br>X3<br>[Arachis | 76.57  | 18.812 | 5.7 | 4 | 4 | 2 | 0.983 | 1.05  | 1.013 | 0.945 | 1.01  | 1.003 | 0.971 | 3.60E-01 |

|                                   |                                                                                                                                                               |        |        |      |    |    |    |       |       |       |       |       |       |       |          |
|-----------------------------------|---------------------------------------------------------------------------------------------------------------------------------------------------------------|--------|--------|------|----|----|----|-------|-------|-------|-------|-------|-------|-------|----------|
| cds.CL310<br>Contig1_m<br>.6129   | PREDICT<br>ED:<br>serine/thre<br>onine-<br>protein<br>kinase<br>dst2-like<br>isoform<br>X7<br>[Lupinus<br>angustifoli<br>us]                                  | 27.829 | 3.6606 | 3.5  | 1  | 1  | 1  | 1.052 | 1.012 | 0.903 | 1.031 | 1.005 | 1.003 | 1.024 | 6.08E-01 |
| cds.CL312<br>3Contig1_<br>m.26192 | PREDICT<br>ED: 2-<br>dehydro-3-<br>deoxyphos<br>phooctonat<br>e aldolase<br>1<br>[Capsicum<br>annuum]<br>Bifunction<br>al<br>aspartokin<br>ase/homos<br>erine | 31.744 | 16.186 | 24.1 | 5  | 6  | 5  | 1.074 | 1.056 | 1.055 | 0.959 | 0.936 | 0.953 | 0.894 | 2.77E-04 |
| cds.CL312<br>8Contig1_<br>m.6449  | dehydroge<br>nase<br>[Morus<br>notabilis]                                                                                                                     | 100.28 | 284.78 | 32   | 23 | 43 | 13 | 0.975 | 1.015 | 0.961 | 1.055 | 1.027 | 1.023 | 1.052 | 5.49E-02 |



|                                  |                                                                                                                                                                                                                                                                                                                                                                                                                                                         |        |        |      |   |    |   |       |       |       |       |       |       |       |          |
|----------------------------------|---------------------------------------------------------------------------------------------------------------------------------------------------------------------------------------------------------------------------------------------------------------------------------------------------------------------------------------------------------------------------------------------------------------------------------------------------------|--------|--------|------|---|----|---|-------|-------|-------|-------|-------|-------|-------|----------|
| cds.CL318<br>Contig1_m<br>.48735 | PREDICT<br>ED: (+)-<br>neomentho<br>l<br>dehydroge<br>nase-like<br>[Ziziphus<br>jujuba]<br>PREDICT<br>ED:<br>translocase<br>of<br>chloroplast<br>120,<br>chloroplast<br>ic-like<br>isoform<br>X1<br>[Glycine<br>max]<br>PREDICT<br>ED:<br>translocase<br>of<br>chloroplast<br>120,<br>chloroplast<br>ic isoform<br>X1 [Vitis<br>vinifera]<br>PREDICT<br>ED:<br>vacuolar<br>protein<br>sorting-<br>associated<br>protein<br>35A<br>[Theobrom<br>a cacao] | 14.599 | 67.431 | 57.7 | 7 | 20 | 7 | 0.965 | 0.951 | 0.967 | 1.068 | 1.052 | 1.019 | 1.089 | 4.58E-03 |
| cds.CL323<br>3Contig1_<br>m.1855 | chloroplast<br>120,<br>chloroplast<br>ic-like<br>isoform<br>X1<br>[Glycine<br>max]<br>PREDICT<br>ED:<br>translocase<br>of<br>chloroplast<br>120,<br>chloroplast<br>ic isoform<br>X1 [Vitis<br>vinifera]<br>PREDICT<br>ED:<br>vacuolar<br>protein<br>sorting-<br>associated<br>protein<br>35A<br>[Theobrom<br>a cacao]                                                                                                                                   | 92.542 | 23.24  | 10.8 | 8 | 11 | 8 | 1.049 | 1.065 | 1.087 | 0.911 | 0.935 | 0.942 | 0.871 | 6.76E-04 |
| cds.CL323<br>3Contig1_<br>m.1856 | chloroplast<br>120,<br>chloroplast<br>ic isoform<br>X1 [Vitis<br>vinifera]<br>PREDICT<br>ED:<br>vacuolar<br>protein<br>sorting-<br>associated<br>protein<br>35A<br>[Theobrom<br>a cacao]                                                                                                                                                                                                                                                                | 44.644 | 1.3694 | 1.9  | 1 | 1  | 1 | 1.097 | 1.138 | 1.116 | 0.922 | 0.844 | 0.858 | 0.783 | 1.10E-03 |
| cds.CL323<br>Contig1_m<br>.7000  | vacuolar<br>protein<br>sorting-<br>associated<br>protein<br>35A<br>[Theobrom<br>a cacao]                                                                                                                                                                                                                                                                                                                                                                | 63.014 | 8.1278 | 8.2  | 5 | 5  | 5 | 0.926 | 0.975 | 1.027 | 1.04  | 0.991 | 1.056 | 1.054 | 2.07E-01 |

|                                   |                                                                                                                                                                                                                                                                                                                                                                                                                      |        |        |      |   |   |   |       |       |       |       |       |       |       |          |
|-----------------------------------|----------------------------------------------------------------------------------------------------------------------------------------------------------------------------------------------------------------------------------------------------------------------------------------------------------------------------------------------------------------------------------------------------------------------|--------|--------|------|---|---|---|-------|-------|-------|-------|-------|-------|-------|----------|
| cds.CL323<br>Contig1_m<br>.7001   | PREDICT<br>ED:<br>vacuolar<br>protein<br>sorting-<br>associated<br>protein<br>35A-like<br>[Malus<br>domestica]<br>PREDICT<br>ED:<br>ubiquitin<br>carboxyl-<br>terminal<br>hydrolase<br>12-like<br>[Malus<br>domestica]<br>PREDICT<br>ED: cell<br>division<br>control<br>protein 2<br>homolog<br>A-like<br>[Solanum<br>tuberosum<br>calmodulin<br>-binding<br>protein<br>[Arabidop<br>sis lyrata<br>subsp.<br>lyrata] | 23.016 | 5.1691 | 13.1 | 3 | 3 | 3 | 0.932 | 1.065 | 0.945 | 1.139 | 1.003 | 0.944 | 1.049 | 5.41E-01 |
| cds.CL325<br>1Contig1_<br>m.45324 | ubiquitin<br>carboxyl-<br>terminal<br>hydrolase<br>12-like<br>[Malus<br>domestica]<br>PREDICT<br>ED: cell<br>division<br>control<br>protein 2<br>homolog<br>A-like<br>[Solanum<br>tuberosum<br>calmodulin<br>-binding<br>protein<br>[Arabidop<br>sis lyrata<br>subsp.<br>lyrata]                                                                                                                                     | 28.091 | 5.2496 | 7.3  | 2 | 2 | 2 |       |       |       |       |       |       |       |          |
| cds.CL325<br>8Contig1_<br>m.25630 | ubiquitin<br>carboxyl-<br>terminal<br>hydrolase<br>12-like<br>[Malus<br>domestica]<br>PREDICT<br>ED: cell<br>division<br>control<br>protein 2<br>homolog<br>A-like<br>[Solanum<br>tuberosum<br>calmodulin<br>-binding<br>protein<br>[Arabidop<br>sis lyrata<br>subsp.<br>lyrata]                                                                                                                                     | 33.865 | -2     | 5.8  | 2 | 3 | 1 | 1.081 | 1.111 | 1.048 | 0.905 | 0.924 | 0.912 | 0.846 | 7.39E-04 |
| cds.CL325<br>9Contig1_<br>m.25268 | ubiquitin<br>carboxyl-<br>terminal<br>hydrolase<br>12-like<br>[Malus<br>domestica]<br>PREDICT<br>ED: cell<br>division<br>control<br>protein 2<br>homolog<br>A-like<br>[Solanum<br>tuberosum<br>calmodulin<br>-binding<br>protein<br>[Arabidop<br>sis lyrata<br>subsp.<br>lyrata]                                                                                                                                     | 20.49  | 1.353  | 11.5 | 2 | 2 | 2 | 0.965 | 1.03  | 0.906 | 1.067 | 1.042 | 1.011 | 1.075 | 1.40E-01 |



|                                   |                                                                                                  |        |        |      |   |   |   |       |       |       |       |       |       |       |          |
|-----------------------------------|--------------------------------------------------------------------------------------------------|--------|--------|------|---|---|---|-------|-------|-------|-------|-------|-------|-------|----------|
|                                   | PREDICT<br>ED:<br>protein<br>EARLY<br>RESPONSIVE TO                                              |        |        |      |   |   |   |       |       |       |       |       |       |       |          |
| cds.CL326<br>2Contig1_<br>m.34763 | DEHYDR<br>ATION<br>15-like<br>[Daucus<br>carota<br>subsp.<br>sativus]                            | 24.665 | 15.181 | 7.1  | 1 | 2 | 1 | 0.853 | 0.957 | 0.976 | 1.14  | 1.037 | 1.083 | 1.17  | 3.44E-02 |
|                                   | PREDICT<br>ED:<br>cytochrom<br>e P450<br>89A2-like<br>[Nicotiana<br>tabacum]                     |        |        |      |   |   |   |       |       |       |       |       |       |       |          |
| cds.CL328<br>4Contig1_<br>m.30235 | cytochrom<br>e P450<br>89A2-like<br>[Nicotiana<br>tabacum]                                       | 44.755 | 11.535 | 14.8 | 6 | 8 | 3 | 0.875 | 0.969 | 0.979 | 1.174 | 1.006 | 1.033 | 1.138 | 9.78E-02 |
|                                   | PREDICT<br>ED: 7-<br>deoxyloga<br>netin<br>glucosyltra<br>nsferase<br>[Vitis<br>vinifera]        |        |        |      |   |   |   |       |       |       |       |       |       |       |          |
| cds.CL329<br>9Contig1_<br>m.20125 | deoxyloga<br>netin<br>glucosyltra<br>nsferase<br>[Vitis<br>vinifera]                             | 40.612 | 2.9666 | 5.1  | 2 | 3 | 1 |       |       |       |       |       |       |       |          |
|                                   | PREDICT<br>ED:<br>thioredoxi<br>n-like 4,<br>chloroplast<br>ic isoform<br>X1 [Vitis<br>vinifera] |        |        |      |   |   |   |       |       |       |       |       |       |       |          |
| cds.CL332<br>3Contig1_<br>m.32482 | thioredoxi<br>n-like 4,<br>chloroplast<br>ic isoform<br>X1 [Vitis<br>vinifera]                   | 21.703 | 1.2624 | 3.7  | 1 | 1 | 1 | 1.068 | 0.989 | 1.051 | 0.919 | 0.993 | 0.972 | 0.928 | 8.53E-02 |

|                                   |                                                                                                                                           |        |        |      |   |    |   |       |       |       |       |       |       |       |          |
|-----------------------------------|-------------------------------------------------------------------------------------------------------------------------------------------|--------|--------|------|---|----|---|-------|-------|-------|-------|-------|-------|-------|----------|
| cds.CL332<br>5Contig1_<br>m.15610 | PREDICT<br>ED:<br>luminal-<br>binding<br>protein 4-<br>like<br>[Nelumbo<br>nucifera]                                                      | 77.071 | 7.6128 | 13.1 | 9 | 16 | 3 | 1.177 | 1.137 | 1.128 | 0.887 | 0.88  | 0.763 | 0.735 | 3.60E-03 |
| cds.CL332<br>7Contig1_<br>m.35996 | PREDICT<br>ED:<br>putative<br>UDP-<br>glucose<br>flavonoid<br>3-O-<br>glucosyltra<br>nsferase 3<br>[Fragaria<br>vesca<br>subsp.<br>vesca] | 40.281 | 40.817 | 12.7 | 4 | 12 | 4 | 0.971 | 0.97  | 1.066 | 0.985 | 1.011 | 1.028 | 1.006 | 8.57E-01 |
| cds.CL333<br>4Contig1_<br>m.18342 | PREDICT<br>ED:<br>protein<br>HG2<br>isoform<br>X2 [Vitis<br>vinifera]                                                                     | 50.412 | 5.8536 | 6.3  | 3 | 3  | 3 | 1.142 | 1.065 | 1.238 | 0.847 | 0.809 | 0.861 | 0.731 | 2.74E-03 |
| cds.CL336<br>2Contig1_<br>m.38227 | PREDICT<br>ED:<br>REF/SRPP<br>-like<br>protein<br>At3g0550<br>0 [Juglans<br>regia]                                                        | 31.545 | 21.731 | 16.6 | 4 | 7  | 4 | 0.905 | 0.955 | 0.998 | 1.059 | 1.075 | 1.034 | 1.108 | 2.72E-02 |



|           |                                                                                                                                            |        |        |      |    |    |   |       |       |       |       |       |       |       |          |
|-----------|--------------------------------------------------------------------------------------------------------------------------------------------|--------|--------|------|----|----|---|-------|-------|-------|-------|-------|-------|-------|----------|
| cds.CL344 | PREDICT<br>ED: dol-P-<br>Man:Man(<br>6)GlcNAc(<br>2)-PP-Dol<br>alpha-1,2-<br>mannosyltr<br>ansferase<br>[Nicotiana<br>tomentosif<br>ormis] | 25.787 | 34.245 | 7.8  | 1  | 1  | 1 |       |       |       |       |       |       |       |          |
| cds.CL344 | PREDICT<br>ED:<br>linoleate<br>13S-<br>lipoxygena<br>se 2-1,<br>chloroplast<br>ic-like<br>[Ziziphus<br>jujuba]                             | 105.36 | 11.229 | 36.8 | 37 | 96 | 1 | 0.909 | 0.939 | 0.97  | 1.153 | 1.007 | 1.096 | 1.155 | 3.06E-02 |
| cds.CL346 | PREDICT<br>ED:<br>protein<br>CASP<br>isoform<br>X1 [Vitis<br>vinifera]                                                                     | 79.134 | 2.6519 | 2.2  | 2  | 2  | 2 | 1.041 | 1.008 | 1.048 | 0.966 | 0.962 | 0.973 | 0.937 | 6.36E-03 |
| cds.CL347 | PREDICT<br>ED: alpha-<br>galactosida<br>se 3<br>[Malus<br>domestica]                                                                       | 46.934 | 2.5192 | 10.6 | 5  | 13 | 1 | 0.973 | 0.956 | 0.949 | 1.02  | 1.039 | 1.082 | 1.091 | 1.00E-02 |

|                           |                                                                                                                               |        |        |      |   |    |   |       |       |       |       |       |       |       |          |
|---------------------------|-------------------------------------------------------------------------------------------------------------------------------|--------|--------|------|---|----|---|-------|-------|-------|-------|-------|-------|-------|----------|
| cds.CL3474Contig1_m.38487 | PREDICTED:<br>acetyl-coenzyme A carboxylase subunit alpha, chloroplastic-like<br>[Nicotiana tabacum]                          | 26.019 | 2.1233 | 3.5  | 1 | 1  | 1 | 1.012 | 1.206 | 1.127 | 0.974 | 0.858 | 0.81  | 0.79  | 3.40E-02 |
| cds.CL3478Contig1_m.24459 | PREDICTED:<br>protein SGT1 homolog B<br>[Theobroma cacao]                                                                     | 40.61  | 30.532 | 21.8 | 9 | 15 | 8 | 1.04  | 0.986 | 0.973 | 1.004 | 1.038 | 1.006 | 1.016 | 5.13E-01 |
| cds.CL3510Contig1_m.34721 | PREDICTED:<br>dnaJ protein homolog 2-like<br>[Nelumbo nucifera] late embryogenesis abundant protein Lea5<br>[Citrus sinensis] | 39.427 | 1.8909 | 5.9  | 2 | 2  | 1 | 1.165 | 1.153 | 1.124 | 0.868 | 0.793 | 0.855 | 0.731 | 4.63E-04 |
| cds.CL3522Contig1_m.48014 | PREDICTED:<br>dnaJ protein homolog 2-like<br>[Nelumbo nucifera] late embryogenesis abundant protein Lea5<br>[Citrus sinensis] | 13.474 | 5.6271 | 13.7 | 2 | 2  | 2 | 1.092 | 1.116 | 1.143 | 0.855 | 0.868 | 0.898 | 0.782 | 2.37E-04 |



|                                  |                                                                                                                |        |        |      |    |    |   |       |       |       |       |       |       |       |          |
|----------------------------------|----------------------------------------------------------------------------------------------------------------|--------|--------|------|----|----|---|-------|-------|-------|-------|-------|-------|-------|----------|
| cds.CL36<br>Contig2_m<br>.31756  | PREDICT<br>ED: ras-<br>related<br>protein<br>RABE1a-<br>like<br>[Tarenaya<br>hassleriana<br>]                  | 24.068 | 71.755 | 43.8 | 10 | 22 | 3 | 0.974 | 0.937 | 0.939 | 1.12  | 1.031 | 1.05  | 1.123 | 1.46E-02 |
| cds.CL379<br>Contig1_m<br>.39933 | PREDICT<br>ED: alpha-<br>glucosidas<br>e 2<br>[Prunus                                                          | 22.427 | 13.567 | 14.2 | 2  | 3  | 2 | 1.006 | 1.033 | 0.948 | 1.068 | 0.977 | 0.979 | 1.012 | 7.71E-01 |
| cds.CL389<br>Contig1_m<br>.20104 | PREDICT<br>ED:<br>autophagy-<br>related<br>protein<br>18a<br>isoform<br>X1<br>[Nelumbo<br>nucifera]            | 42.791 | 2.5172 | 2.6  | 1  | 1  | 1 |       |       |       |       |       |       |       |          |
| cds.CL38<br>Contig5_m<br>.23750  | PREDICT<br>ED:<br>aspartate--<br>tRNA<br>ligase,<br>chloroplast<br>ic/mitocho<br>ndrial<br>[Vitis<br>vinifera] | 27.953 | 27.166 | 24   | 5  | 6  | 5 | 0.961 | 0.925 | 0.961 | 1.067 | 1.087 | 1.069 | 1.132 | 9.00E-04 |

|                                  |                                                                                                          |        |        |      |    |     |    |       |       |       |       |       |       |       |          |
|----------------------------------|----------------------------------------------------------------------------------------------------------|--------|--------|------|----|-----|----|-------|-------|-------|-------|-------|-------|-------|----------|
| cds.CL423<br>Contig1_m<br>.10274 | PREDICT<br>ED: heat<br>shock 70<br>kDa<br>protein 6,<br>chloroplast<br>ic<br>[Gossypiu<br>m<br>arboreum] | 75.705 | 323.31 | 54.5 | 39 | 128 | 22 | 1.053 | 1.011 | 1.022 | 0.963 | 0.958 | 0.971 | 0.937 | 7.14E-03 |
| cds.CL42<br>Contig3_m<br>.9636   | PREDICT<br>ED:<br>protein<br>RAE1<br>[Ricinus<br>communis]                                               | 46.158 | 10.582 | 11.3 | 4  | 4   | 4  | 1.025 | 0.971 | 0.954 | 0.984 | 1.037 | 1.059 | 1.044 | 2.33E-01 |
| cds.CL449<br>Contig1_m<br>.2878  | PREDICT<br>ED:<br>topless-<br>related<br>protein 4-<br>like<br>[Nicotiana<br>tabacum]                    | 68.994 | 2.0319 | 4.9  | 3  | 4   | 1  | 1.009 | 0.962 | 1.008 | 0.978 | 1.079 | 0.976 | 1.018 | 6.65E-01 |
| cds.CL449<br>Contig1_m<br>.2879  | PREDICT<br>ED:<br>topless-<br>related<br>protein 4<br>isoform<br>X1<br>[Solanum<br>tuberosum]            | 59.834 | 13.964 | 9.9  | 4  | 4   | 3  | 1.026 | 0.99  | 1.011 | 1.029 | 0.951 | 0.999 | 0.984 | 5.51E-01 |









|                                  |                                                                                                                                  |        |        |      |    |    |    |       |       |       |       |       |       |       |          |
|----------------------------------|----------------------------------------------------------------------------------------------------------------------------------|--------|--------|------|----|----|----|-------|-------|-------|-------|-------|-------|-------|----------|
| cds.CL546<br>Contig1_m<br>.8418  | PREDICT<br>ED: cell<br>division<br>cycle<br>protein 48<br>homolog<br>[Jatropha<br>curcas]                                        | 91.241 | 298.93 | 49.5 | 34 | 84 | 6  | 1.051 | 1.056 | 1.075 | 0.927 | 0.934 | 0.938 | 0.88  | 7.79E-05 |
| cds.CL546<br>Contig2_m<br>.7929  | PREDICT<br>ED: cell<br>division<br>cycle<br>protein 48<br>homolog<br>[Gossypiu<br>m<br>hirsutum]                                 | 89.542 | 84.355 | 43.1 | 30 | 70 | 2  | 1.061 | 1.119 | 1.115 | 1.063 | 0.922 | 0.838 | 0.857 | 8.91E-02 |
| cds.CL563<br>Contig1_m<br>.8180  | PREDICT<br>ED:<br>probable<br>cytosolic<br>oligopepti<br>dase A<br>[Nicotiana<br>attenuata]                                      | 91.055 | 82.411 | 26.3 | 21 | 32 | 21 | 0.96  | 0.969 | 0.975 | 1.063 | 1.054 | 1.026 | 1.082 | 2.42E-03 |
| cds.CL568<br>Contig1_m<br>.38094 | PREDICT<br>ED:<br>ADP,ATP<br>carrier<br>protein 1,<br>mitochond<br>rial-like<br>[Musa<br>acuminata<br>subsp.<br>malaccensi<br>s] | 24.335 | 14.379 | 27.2 | 6  | 28 | 2  | 1.045 | 1.066 | 1.02  | 0.915 | 0.904 | 1.039 | 0.913 | 1.15E-01 |

|                                  |                                                                                                                                                                                                                                                                                                                                                                                                                                                               |        |        |      |   |    |   |       |       |       |       |       |       |       |          |
|----------------------------------|---------------------------------------------------------------------------------------------------------------------------------------------------------------------------------------------------------------------------------------------------------------------------------------------------------------------------------------------------------------------------------------------------------------------------------------------------------------|--------|--------|------|---|----|---|-------|-------|-------|-------|-------|-------|-------|----------|
| cds.CL624<br>Contig1_m<br>.19144 | PREDICT<br>ED:<br>glyceralde<br>hyde-3-<br>phosphate<br>dehydroge<br>nase<br>GAPCP2,<br>chloroplast<br>ic-like<br>[Nelumbo<br>nucifera]<br>PREDICT<br>ED:<br>probable<br>inactive<br>ATP-<br>dependent<br>zinc<br>metallopro<br>tease<br>FTSHI 4,<br>chloroplast<br>ic<br>[Gossypiu<br>m<br>hirsutum]<br>PREDICT<br>ED: WD-<br>40 repeat-<br>containing<br>protein<br>MSII<br>[Sesamum<br>indicum]<br>PREDICT<br>ED: nigrin<br>b-like<br>[Malus<br>domestica] | 44.8   | 21.881 | 15.3 | 6 | 15 | 4 | 1.128 | 1.053 | 1.063 | 0.916 | 0.916 | 0.929 | 0.851 | 1.88E-03 |
| cds.CL627<br>Contig1_m<br>.6284  | zinc<br>metallopro<br>tease<br>FTSHI 4,<br>chloroplast<br>ic<br>[Gossypiu<br>m<br>hirsutum]<br>PREDICT<br>ED: WD-<br>40 repeat-<br>containing<br>protein<br>MSII<br>[Sesamum<br>indicum]<br>PREDICT<br>ED: nigrin<br>b-like<br>[Malus<br>domestica]                                                                                                                                                                                                           | 96.864 | 11.934 | 7.1  | 7 | 8  | 7 | 0.985 | 0.997 | 1.025 | 1.02  | 0.997 | 0.989 | 1     | 9.86E-01 |
| cds.CL646<br>Contig1_m<br>.14438 | zinc<br>metallopro<br>tease<br>FTSHI 4,<br>chloroplast<br>ic<br>[Gossypiu<br>m<br>hirsutum]<br>PREDICT<br>ED: WD-<br>40 repeat-<br>containing<br>protein<br>MSII<br>[Sesamum<br>indicum]<br>PREDICT<br>ED: nigrin<br>b-like<br>[Malus<br>domestica]                                                                                                                                                                                                           | 48.38  | 31.607 | 13.7 | 5 | 7  | 5 | 0.926 | 1.044 | 0.967 | 1.042 | 0.98  | 1.062 | 1.05  | 3.10E-01 |
| cds.CL663<br>Contig1_m<br>.36704 | zinc<br>metallopro<br>tease<br>FTSHI 4,<br>chloroplast<br>ic<br>[Gossypiu<br>m<br>hirsutum]<br>PREDICT<br>ED: WD-<br>40 repeat-<br>containing<br>protein<br>MSII<br>[Sesamum<br>indicum]<br>PREDICT<br>ED: nigrin<br>b-like<br>[Malus<br>domestica]                                                                                                                                                                                                           | 33.44  | 4.5206 | 9.4  | 3 | 3  | 3 | 0.987 | 0.959 | 0.942 | 1.031 | 1.048 | 1.052 | 1.084 | 5.62E-03 |



|                                  |                                                                                                                                             |        |        |      |   |   |   |       |       |       |       |       |       |       |          |
|----------------------------------|---------------------------------------------------------------------------------------------------------------------------------------------|--------|--------|------|---|---|---|-------|-------|-------|-------|-------|-------|-------|----------|
| cds.CL686<br>Contig1_m<br>.20439 | PREDICT<br>ED:<br>putative<br>RNA-<br>binding<br>protein<br>Luc7-like<br>2 isoform<br>X5<br>[Nelumbo<br>nucifera]                           | 33.344 | 6.3235 | 8.6  | 3 | 3 | 3 | 1.103 | 1.049 | 1.05  | 0.936 | 0.908 | 0.92  | 0.863 | 1.44E-03 |
| cds.CL6C<br>ontig1_m.<br>11214   | PREDICT<br>ED: G-<br>type lectin<br>S-receptor-<br>like<br>serine/thre-<br>onine-<br>protein<br>kinase<br>At4g2729<br>0 [Vitis<br>vinifera] | 91.978 | 2.7721 | 1.3  | 1 | 1 | 1 | 0.995 | 0.987 | 0.947 | 0.981 | 1.102 | 1.002 | 1.053 | 2.61E-01 |
| cds.CL708<br>Contig1_m<br>.16547 | PREDICT<br>ED:<br>apoptosis<br>inhibitor 5<br>[Sesamum<br>indicum]                                                                          | 34.799 | 9.9676 | 20.4 | 7 | 8 | 7 | 1.013 | 1.007 | 0.991 | 1.006 | 1.001 | 0.992 | 0.996 | 6.35E-01 |
| cds.CL708<br>Contig1_m<br>.16548 | PREDICT<br>ED:<br>apoptosis<br>inhibitor<br>5-like<br>protein<br>API5<br>isoform<br>X1 [Vitis<br>vinifera]                                  | 31.314 | 37.299 | 28.3 | 7 | 9 | 7 | 1.037 | 1.02  | 0.984 | 0.974 | 0.963 | 0.99  | 0.963 | 9.47E-02 |





|                                  |                                                                                                                                          |        |        |      |    |    |    |       |       |       |       |       |       |       |          |
|----------------------------------|------------------------------------------------------------------------------------------------------------------------------------------|--------|--------|------|----|----|----|-------|-------|-------|-------|-------|-------|-------|----------|
|                                  | PREDICT<br>ED:<br>glutamate-<br>1-                                                                                                       |        |        |      |    |    |    |       |       |       |       |       |       |       |          |
| cds.CL772<br>Contig1_m<br>.15228 | semialdeh<br>yde 2,1-<br>aminomuta<br>se 2,<br>chloroplast<br>ic [Citrus<br>sinensis]<br>PREDICT<br>ED:<br>glyceropho<br>sphodieste<br>r | 50.993 | 137.82 | 37.5 | 16 | 39 | 16 | 1.069 | 1.05  | 1.057 | 0.909 | 0.949 | 0.947 | 0.883 | 1.14E-03 |
| cds.CL776<br>Contig1_m<br>.41420 | phosphodi<br>esterase<br>GDPD1,<br>chloroplast<br>ic-like<br>[Pyrus x<br>bretschnei<br>deri]<br>PREDICT<br>ED:                           | 18.072 | 11.28  | 29.8 | 5  | 8  | 5  | 1.104 | 1.06  | 1.117 | 0.876 | 0.901 | 0.911 | 0.819 | 5.39E-04 |
| cds.CL782<br>Contig1_m<br>.4507  | importin<br>subunit<br>beta-1<br>[Vitis<br>vinifera]                                                                                     | 96.404 | 15.599 | 9.6  | 6  | 10 | 3  | 0.985 | 1.032 | 1.026 | 1.014 | 0.939 | 1.01  | 0.974 | 4.03E-01 |

|                                 |                                                                                                                                                                                                                                                                                                                                                            |        |        |      |    |     |    |       |       |       |       |       |       |       |          |
|---------------------------------|------------------------------------------------------------------------------------------------------------------------------------------------------------------------------------------------------------------------------------------------------------------------------------------------------------------------------------------------------------|--------|--------|------|----|-----|----|-------|-------|-------|-------|-------|-------|-------|----------|
| cds.CL798<br>Contig1_m<br>.5776 | PREDICT<br>ED: ATP-<br>dependent<br>Clp<br>protease<br>ATP-<br>binding<br>subunit<br>ClpA<br>homolog<br>CD4B,<br>chloroplast<br>ic-like<br>[Nicotiana<br>tabacum]<br>PREDICT<br>ED:<br>cytosolic<br>Fe-S<br>cluster<br>assembly<br>factor<br>NBP35-<br>like<br>[Sesamum<br>indicum]<br>PREDICT<br>ED:<br>tubulin<br>alpha<br>chain<br>[Ziziphus<br>jujuba] | 104.65 | 323.31 | 46.7 | 43 | 138 | 42 | 1.024 | 1.021 | 1.017 | 0.98  | 0.987 | 0.977 | 0.961 | 4.02E-04 |
| cds.CL817<br>Contig1_m<br>.5545 | cytosolic<br>Fe-S<br>cluster<br>assembly<br>factor<br>NBP35-<br>like<br>[Sesamum<br>indicum]<br>PREDICT<br>ED:<br>tubulin<br>alpha<br>chain<br>[Ziziphus<br>jujuba]                                                                                                                                                                                        | 37.852 | 4.2373 | 4.5  | 2  | 2   | 2  | 0.964 | 1.003 | 0.959 | 0.977 | 0.992 | 1.117 | 1.055 | 3.12E-01 |
| cds.CL83<br>Contig1_m<br>.15259 | tubulin<br>alpha<br>chain<br>[Ziziphus<br>jujuba]                                                                                                                                                                                                                                                                                                          | 49.677 | 103.8  | 32   | 12 | 24  | 2  | 1.164 | 1.213 | 1.213 | 0.788 | 0.835 | 0.757 | 0.663 | 2.00E-04 |

|                                  |                                                                                                             |        |        |      |    |    |   |       |       |       |       |       |       |       |          |
|----------------------------------|-------------------------------------------------------------------------------------------------------------|--------|--------|------|----|----|---|-------|-------|-------|-------|-------|-------|-------|----------|
|                                  | PREDICT<br>ED:<br>sphingosin<br>e kinase 2-<br>like isoform<br>X3<br>[Juglans<br>regia]                     |        |        |      |    |    |   |       |       |       |       |       |       |       |          |
| cds.CL883<br>Contig1_m<br>.18608 |                                                                                                             | 22.618 | 1.7371 | 6.4  | 1  | 2  | 1 | 0.901 | 0.964 | 0.955 | 1.053 | 1.101 | 1.059 | 1.139 | 6.72E-03 |
|                                  | PREDICT<br>ED:<br>sphingosin<br>e kinase 1<br>isoform<br>X4<br>[Jatropha<br>curcas]                         |        |        |      |    |    |   |       |       |       |       |       |       |       |          |
| cds.CL883<br>Contig1_m<br>.18609 |                                                                                                             | 20.216 | 4.4335 | 8.1  | 1  | 1  | 1 | 1.007 | 0.937 | 1.067 | 1.069 | 0.958 | 0.975 | 0.997 | 9.59E-01 |
|                                  | PREDICT<br>ED:<br>phosphoen-<br>olpyruvate<br>carboxylas-<br>e<br>[Theobrom-<br>a cacao]                    |        |        |      |    |    |   |       |       |       |       |       |       |       |          |
| cds.CL89<br>Contig1_m<br>.16639  |                                                                                                             | 47.931 | 55.278 | 47.5 | 22 | 47 | 5 | 1.048 | 1.056 | 1.052 | 0.963 | 0.892 | 0.914 | 0.877 | 2.86E-02 |
|                                  | PREDICT<br>ED:<br>phosphoen-<br>olpyruvate<br>carboxylas-<br>e,<br>housekeepi-<br>ng<br>isozyme<br>[Juglans |        |        |      |    |    |   |       |       |       |       |       |       |       |          |
| cds.CL89<br>Contig1_m<br>.16640  |                                                                                                             | 21.338 | 14.112 | 37.9 | 7  | 15 | 2 | 0.907 | 1.147 | 1.223 | 0.962 | 0.761 | 0.997 | 0.83  | 2.10E-01 |



|                                                                 |                                                                                                                                        |        |        |     |   |   |   |       |       |       |       |       |       |       |          |
|-----------------------------------------------------------------|----------------------------------------------------------------------------------------------------------------------------------------|--------|--------|-----|---|---|---|-------|-------|-------|-------|-------|-------|-------|----------|
| cds.CL988<br>Contig1_m<br>.34155                                | PREDICT<br>ED: non-<br>functional<br>NADPH-<br>dependent<br>codeinone<br>reductase<br>2-like<br>[Jatropha<br>curcas]<br>PREDICT<br>ED: | 42.05  | 5.5254 | 6.2 | 2 | 4 | 2 | 0.975 | 1.074 | 1.065 | 1.005 | 0.946 | 0.958 | 0.934 | 1.34E-01 |
| cds.CL99<br>Contig2_m<br>.1015                                  | glutamate<br>synthase 1<br>[NADH],<br>chloroplast<br>ic isoform<br>X1 [Vitis<br>vinifera]<br>PREDICT<br>ED:                            | 122.3  | 4.3976 | 5.1 | 5 | 5 | 2 | 0.864 | 1.014 | 0.914 | 0.98  | 1.165 | 1.096 | 1.161 | 9.73E-02 |
| cds.Camell<br>ia_sinensis<br>.comp1000<br>2_c0_seq1<br>_m.13184 | ED:<br>histone<br>deacetylase 5<br>[Theobroma<br>cacao]<br>PREDICT<br>ED:                                                              | 56.377 | 10.34  | 5.4 | 2 | 2 | 2 | 1.051 | 1.029 | 1.025 | 1.018 | 0.936 | 0.94  | 0.932 | 6.66E-02 |
| cds.Camell<br>ia_sinensis<br>.comp1000<br>9_c0_seq1<br>_m.34659 | UPF0587<br>protein<br>C1orf123<br>homolog<br>[Vitis<br>vinifera]                                                                       | 21.445 | 9.3395 | 22  | 4 | 4 | 4 | 0.907 | 0.937 | 0.868 | 1.046 | 1.156 | 1.123 | 1.226 | 5.37E-03 |

|                                                                                                               |                   |        |        |      |   |   |   |       |       |       |       |       |       |       |          |  |
|---------------------------------------------------------------------------------------------------------------|-------------------|--------|--------|------|---|---|---|-------|-------|-------|-------|-------|-------|-------|----------|--|
| cds.Camellia_sinensis.comp1002                                                                                | 7_c0_seq1_m.52968 | 17.263 | 1.8233 | 8.2  | 1 | 1 | 1 |       |       |       |       |       |       |       |          |  |
| PREDICTED:<br>pyruvate dehydrogenase E1 component subunit alpha-3, chloroplastic isoform X1 [Citrus sinensis] |                   |        |        |      |   |   |   |       |       |       |       |       |       |       |          |  |
| cds.Camellia_sinensis.comp1003                                                                                | 1_c0_seq1_m.34320 | 27.039 | 52.302 | 21.4 | 3 | 3 | 3 | 0.956 | 1.012 | 1.136 | 0.922 | 1.012 | 0.967 | 0.935 | 3.16E-01 |  |
| PREDICTED:<br>probable pyridoxal 5'-phosphate synthase subunit PDX2 isoform X1 [Pyrus bretschneideri]         |                   |        |        |      |   |   |   |       |       |       |       |       |       |       |          |  |
| cds.Camellia_sinensis.comp1004                                                                                | 5_c0_seq1_m.58892 | 11.199 | 6.5161 | 31.1 | 3 | 4 | 2 | 0.966 | 0.947 | 0.985 | 1.028 | 1.043 | 1.051 | 1.077 | 4.68E-03 |  |
| PREDICTED:<br>calcium-transporting ATPase 4, endoplasmic reticulum-type [Daucus carota subsp. sativus]        |                   |        |        |      |   |   |   |       |       |       |       |       |       |       |          |  |







|                                                    |                                                                                              |        |        |      |   |    |   |       |       |       |       |       |       |       |          |
|----------------------------------------------------|----------------------------------------------------------------------------------------------|--------|--------|------|---|----|---|-------|-------|-------|-------|-------|-------|-------|----------|
| cds.Camellia_sinensis.comp1046_6_c0_seq1_m.43937   | PREDICTED: non-specific lipid-transfer protein-like 1 isoform X1 [Vitis vinifera]            | 13.756 | 10.589 | 41.1 | 6 | 10 | 6 | 1.038 | 1.041 | 1.047 | 0.934 | 0.938 | 0.948 | 0.902 | 3.77E-05 |
| cds.Camellia_sinensis.comp1052_56_c0_seq1_m.4639_1 | PREDICTED: beta-glucosidase 24-like isoform X2 [Erythranthe guttata]                         | 20.853 | 5.1094 | 13   | 2 | 3  | 2 |       |       |       |       |       |       |       |          |
| cds.Camellia_sinensis.comp1055_0_c0_seq1_m.39041   | PREDICTED: 3-hydroxyacyl-[acyl-carrier-protein] dehydratase FabZ-like [Nicotiana tabacum]    | 25.576 | 62.654 | 30   | 6 | 16 | 6 | 0.993 | 1.004 | 1.018 | 0.985 | 1.005 | 1.023 | 0.999 | 9.58E-01 |
| cds.Camellia_sinensis.comp1057_7_c0_seq1_m.58057   | PREDICTED: mitochondrial dicarboxylate/tricarboxylate transporter DTC-like [Sesamum indicum] | 12.213 | 6.2969 | 11.8 | 1 | 2  | 1 | 1.062 | 1.038 | 1.03  | 0.903 | 0.958 | 0.997 | 0.913 | 3.86E-02 |



|                                                  |                                                                                                               |        |        |      |   |    |   |       |       |       |       |       |       |       |          |
|--------------------------------------------------|---------------------------------------------------------------------------------------------------------------|--------|--------|------|---|----|---|-------|-------|-------|-------|-------|-------|-------|----------|
| cds.Camellia_sinensis.comp1065_0_c0_seq1_m.12647 | PREDICTED:<br>phosphomethylpyrimidine synthase, chloroplast ic-like isoform X3 [Daucus carota subsp. sativus] | 71.575 | 19.171 | 12.4 | 7 | 8  | 7 | 0.947 | 0.934 | 0.985 | 1.074 | 1.019 | 1.09  | 1.111 | 1.56E-02 |
| cds.Camellia_sinensis.comp1067_0_c0_seq1_m.13958 | PREDICTED:<br>phytoene synthase 2, chloroplast ic [Vitis vinifera]                                            | 47.654 | 10.005 | 8.5  | 3 | 3  | 3 | 0.84  | 1.058 | 0.978 | 1.051 | 1.168 | 0.944 | 1.1   | 3.54E-01 |
| cds.Camellia_sinensis.comp1067_9_c0_seq1_m.20913 | PREDICTED:<br>hsp70-binding protein 1 [Solanum lycopersicum]                                                  | 43.71  | 50.961 | 16.8 | 7 | 13 | 7 | 0.974 | 0.939 | 0.951 | 1.072 | 1.047 | 1.058 | 1.109 | 1.22E-03 |
| cds.Camellia_sinensis.comp1070_2_c0_seq1_m.27407 | PREDICTED:<br>UBP1-associated protein 2A [Daucus carota subsp. sativus]                                       | 41.879 | 1.7058 | 3.8  | 2 | 2  | 2 | 1.154 | 1.093 | 1.082 | 0.9   | 0.894 | 0.846 | 0.793 | 1.16E-03 |

|                                                 |                                                                                                             |        |        |      |    |    |    |       |       |       |       |       |       |       |          |
|-------------------------------------------------|-------------------------------------------------------------------------------------------------------------|--------|--------|------|----|----|----|-------|-------|-------|-------|-------|-------|-------|----------|
| cds.Camellia_sinensis.comp10716_c0_seq1_m.30794 | PREDICTED: Ion protease 2-like [Ziziphus jujuba]                                                            | 32.11  | 32.236 | 9.5  | 2  | 3  | 2  | 0.955 | 0.916 | 0.95  | 1.137 | 1.058 | 1.017 | 1.139 | 2.15E-02 |
| cds.Camellia_sinensis.comp10740_c0_seq1_m.6969  | PREDICTED: uncharacterized aarF domain-containing protein kinase At1g79600, chloroplastic [Jatropha curcas] | 86.068 | 53.07  | 16.7 | 12 | 19 | 11 | 0.989 | 0.976 | 0.96  | 1.037 | 1.065 | 1.026 | 1.069 | 8.80E-03 |
| cds.Camellia_sinensis.comp107685_c0_seq1_m.5269 |                                                                                                             | 18.556 | 2.2212 | 5.6  | 1  | 2  | 1  | 0.978 | 1.006 | 1.029 | 1.013 | 0.984 | 1.001 | 0.995 | 7.89E-01 |
| cds.Camellia_sinensis.comp10794_c0_seq1_m.22161 | PREDICTED: BAG family molecular chaperone regulator 7 [Nicotiana glauca]                                    | 30.069 | 6.3271 | 10.6 | 3  | 4  | 3  | 0.989 | 1.058 | 1.07  | 1.035 | 0.947 | 0.909 | 0.927 | 1.70E-01 |

|                                |                                                                            |        |        |      |   |    |   |       |       |       |       |       |       |       |          |
|--------------------------------|----------------------------------------------------------------------------|--------|--------|------|---|----|---|-------|-------|-------|-------|-------|-------|-------|----------|
| cds.Camellia_sinensis.comp1079 | PREDICTED: BAG family molecular chaperone regulator 7-like [Juglans regia] | 15.821 | 12.688 | 10.8 | 1 | 1  | 1 | 0.925 | 0.94  | 1.249 | 1.002 | 0.832 | 1.063 | 0.93  | 6.09E-01 |
| cds.Camellia_sinensis.comp1080 | PREDICTED: glycine-rich RNA-binding protein RZ1A-like [Gossypium hirsutum] | 17.868 | 12.882 | 21.3 | 3 | 5  | 3 | 1.145 | 1.153 | 1.244 | 0.744 | 0.842 | 0.799 | 0.673 | 8.95E-04 |
| cds.Camellia_sinensis.comp1082 | PREDICTED: AT-hook motif nuclear-localized protein 14 [Vitis vinifera]     | 39.991 | 164.91 | 33   | 9 | 11 | 9 | 1.024 | 0.977 | 0.978 | 0.98  | 1.041 | 1.003 | 1.015 | 5.59E-01 |
| cds.Camellia_sinensis.comp1085 | PREDICTED: COP9 signalosome complex subunit 3 [Nicotiana glauca]           | 48.594 | 37.069 | 18.9 | 7 | 9  | 7 | 0.982 | 0.945 | 1.015 | 1.018 | 1.056 | 1.059 | 1.065 | 5.97E-02 |
| cds.Camellia_sinensis.comp1087 | PREDICTED: 14-3-3-like protein B [Cicer arietinum]                         | 22.119 | 34.154 | 40.7 | 7 | 20 | 5 | 1.001 | 0.976 | 0.974 | 0.973 | 1.025 | 1.027 | 1.025 | 2.82E-01 |

|                                                  |                                                                                      |        |        |      |    |    |    |       |       |       |       |       |       |       |          |
|--------------------------------------------------|--------------------------------------------------------------------------------------|--------|--------|------|----|----|----|-------|-------|-------|-------|-------|-------|-------|----------|
|                                                  | PREDICT<br>ED:                                                                       |        |        |      |    |    |    |       |       |       |       |       |       |       |          |
| cds.Camellia_sinensis.comp1089_9_c0_seq1_m.41027 | transmembrane protein 205 [Vigna radiata var. radiata]                               | 24.758 | 5.8363 | 5.5  | 1  | 4  | 1  | 0.991 | 0.976 | 1.056 | 1.038 | 0.985 | 0.999 | 1     | 1.00E+00 |
|                                                  | PREDICT<br>ED:                                                                       |        |        |      |    |    |    |       |       |       |       |       |       |       |          |
| cds.Camellia_sinensis.comp1092_2_c0_seq1_m.28802 | succinyl-CoA ligase [ADP-forming] subunit alpha-1, mitochondrial [Solanum tuberosum] | 36.392 | 31.068 | 20.6 | 6  | 14 | 6  | 1.02  | 0.968 | 1.05  | 0.981 | 0.994 | 0.983 | 0.974 | 3.40E-01 |
|                                                  | PREDICT<br>ED: acyl carrier                                                          |        |        |      |    |    |    |       |       |       |       |       |       |       |          |
| cds.Camellia_sinensis.comp1092_6_c0_seq1_m.45554 | protein 1, mitochondrial [Sesamum indicum]                                           | 18.28  | 2.3596 | 5.5  | 1  | 2  | 1  | 1.066 | 1.02  | 1.07  | 0.905 | 0.979 | 0.949 | 0.898 | 1.71E-02 |
|                                                  | PREDICT<br>ED:                                                                       |        |        |      |    |    |    |       |       |       |       |       |       |       |          |
| cds.Camellia_sinensis.comp1092_9_c0_seq1_m.22775 | phosphoserine aminotransferase 2, chloroplastic [Vitis vinifera]                     | 47.171 | 111.85 | 38.5 | 13 | 28 | 13 | 0.993 | 1.043 | 1.023 | 1.023 | 0.962 | 0.97  | 0.966 | 2.21E-01 |

|                                                  |                                                                                                                                                                                                                                          |        |        |      |   |   |   |       |       |       |       |       |       |       |          |
|--------------------------------------------------|------------------------------------------------------------------------------------------------------------------------------------------------------------------------------------------------------------------------------------------|--------|--------|------|---|---|---|-------|-------|-------|-------|-------|-------|-------|----------|
| cds.Camellia_sinensis.comp1093_0_c0_seq1_m.21645 | PREDICT<br>ED:<br>glucan<br>endo-1,3-<br>beta-<br>glucosidas<br>e<br>[Erythra<br>PREDICT<br>ED:<br>photosyste<br>m II D1                                                                                                                 | 50.098 | 5.7764 | 3.9  | 2 | 2 | 2 | 0.999 | 1.023 | 1.061 | 1.018 | 0.979 | 0.927 | 0.948 | 1.74E-01 |
| cds.Camellia_sinensis.comp1093_7_c0_seq2_m.44764 | precursor<br>processing<br>protein<br>PSB27-<br>H2,<br>chloroplast<br>ic<br>[Ipomoea<br>nil]<br>PREDICT<br>ED:<br>photosyste<br>m II D1                                                                                                  | 15.999 | 31.45  | 40.6 | 6 | 7 | 6 | 1.071 | 1.075 | 1.093 | 0.884 | 0.932 | 0.91  | 0.842 | 4.77E-04 |
| cds.Camellia_sinensis.comp1094_1_c0_seq1_m.18623 | aldehyde<br>dehydroge<br>nase<br>family 3<br>member<br>F1-like<br>[Daucus<br>carota<br>subsp.<br>sativus]<br>PREDICT<br>ED:<br>aldehyde<br>dehydroge<br>nase<br>family 3<br>member<br>F1-like<br>[Daucus<br>carota<br>subsp.<br>sativus] | 25.483 | 3.5866 | 4.8  | 1 | 1 | 1 |       |       |       |       |       |       |       |          |
| cds.Camellia_sinensis.comp1094_3_c0_seq1_m.42550 | PREDICT<br>ED:<br>glutaredox<br>in-C4<br>[Populus<br>euphratica]                                                                                                                                                                         | 16.37  | 22.511 | 15.4 | 2 | 2 | 2 | 1.098 | 1.028 | 0.843 | 0.976 | 1.003 | 1.048 | 1.02  | 7.75E-01 |

|                                                 |                                                                                         |        |        |      |    |    |    |       |       |       |       |       |       |       |          |
|-------------------------------------------------|-----------------------------------------------------------------------------------------|--------|--------|------|----|----|----|-------|-------|-------|-------|-------|-------|-------|----------|
| cds.Camellia_sinensis.comp11072_c0_seq1_m.44776 | PREDICTED:<br>succinate dehydrogenase subunit 6, mitochondrial-like [Solanum tuberosum] | 19.945 | 11.896 | 29.4 | 4  | 5  | 4  | 1.013 | 0.982 | 1.002 | 1.052 | 1.058 | 0.992 | 1.035 | 2.04E-01 |
| cds.Camellia_sinensis.comp11086_c0_seq1_m.29628 | PREDICTED:<br>calcium sensing receptor, chloroplastic [Citrus sinensis]                 | 43.539 | 156.22 | 42.3 | 16 | 36 | 16 | 0.984 | 0.992 | 0.981 | 1.014 | 1.018 | 1.004 | 1.027 | 7.60E-03 |
| cds.Camellia_sinensis.comp11136_c0_seq1_m.33507 | Proliferating cell nuclear antigen [Morus notabilis]                                    | 33.406 | 14.977 | 19.1 | 5  | 7  | 5  | 0.978 | 0.98  | 1.008 | 1.011 | 1.046 | 1.02  | 1.037 | 5.98E-02 |
| cds.Camellia_sinensis.comp11149_c0_seq1_m.18881 | PREDICTED:<br>ammonium transporter 3 member 1-like [Jatropha                            | 52.367 | 2.0667 | 3.5  | 2  | 2  | 2  | 1.166 | 1.133 | 1.051 | 0.91  | 0.831 | 0.874 | 0.781 | 3.66E-03 |





|                                                 |                                                                                    |        |        |      |   |    |   |       |       |       |       |       |       |       |          |
|-------------------------------------------------|------------------------------------------------------------------------------------|--------|--------|------|---|----|---|-------|-------|-------|-------|-------|-------|-------|----------|
| cds.Camellia_sinensis.comp11229_c0_seq2_m.47116 | PREDICTED:<br>phosphomannomutase/phosphoglucomutase [Prunumume]                    | 24.123 | 16.236 | 20.6 | 4 | 6  | 4 | 0.999 | 0.978 | 0.978 | 0.99  | 1.017 | 1.005 | 1.019 | 1.44E-01 |
| cds.Camellia_sinensis.comp11267_c0_seq1_m.29394 | PREDICTED: 26S proteasome non-ATPase regulatory subunit 7 homolog A [Nicotiana]    | 34.835 | 46.161 | 17.7 | 5 | 9  | 5 | 1.012 | 0.97  | 0.962 | 1     | 1.028 | 1.047 | 1.044 | 1.02E-01 |
| cds.Camellia_sinensis.comp11318_c0_seq1_m.52741 | PREDICTED:<br>ferredoxin-NADP reductase, leaf isozyme, chloroplastic [Glycine max] | 11.816 | 20.431 | 70.7 | 8 | 29 | 4 | 0.978 | 0.947 | 0.959 | 1.021 | 1.067 | 1.037 | 1.084 | 7.34E-03 |
| cds.Camellia_sinensis.comp11344_c0_seq1_m.52995 | PREDICTED:<br>STS14 protein [Vitis vinifera]                                       | 16.43  | 4.0858 | 13.2 | 2 | 2  | 2 | 0.995 | 1.062 | 1.048 | 1.073 | 0.876 | 0.953 | 0.935 | 3.19E-01 |

|                                                 |                                                                                               |        |        |      |   |    |   |       |       |       |       |       |       |       |          |
|-------------------------------------------------|-----------------------------------------------------------------------------------------------|--------|--------|------|---|----|---|-------|-------|-------|-------|-------|-------|-------|----------|
| cds.Camellia_sinensis.comp11350_c0_seq1_m.32544 | PREDICTED:<br>uncharacterized oxidoreductase At4g09670-like [Nicotiana attenuata]             | 41.58  | 16.216 | 9.6  | 3 | 6  | 3 | 0.958 | 1.014 | 1.066 | 0.942 | 1.028 | 1.01  | 0.981 | 6.65E-01 |
| cds.Camellia_sinensis.comp11374_c0_seq1_m.28394 | PREDICTED: WD-40 repeat-containing protein MSI3 [Vitis vinifera]                              | 46.422 | 3.9703 | 6.1  | 3 | 3  | 3 | 0.872 | 1.135 | 0.927 | 1.111 | 0.968 | 1.017 | 1.055 | 5.48E-01 |
| cds.Camellia_sinensis.comp11379_c0_seq1_m.29727 | PREDICTED: acetylglutamate kinase, chloroplastic [Vitis vinifera]                             | 41.239 | 15.931 | 14.3 | 4 | 5  | 4 | 1.075 | 1.016 | 1.002 | 0.954 | 0.998 | 0.916 | 0.927 | 8.23E-02 |
| cds.Camellia_sinensis.comp11391_c0_seq1_m.35926 | PREDICTED: NADH dehydrogenase [ubiquinone] iron-sulfur protein 8, mitochondrial [Ipomoea nil] | 26.285 | 66.654 | 35.5 | 9 | 18 | 9 | 1.02  | 0.984 | 1.048 | 0.98  | 0.969 | 0.983 | 0.961 | 1.01E-01 |



|                                                 |                                                                                        |        |        |      |   |    |   |       |       |       |       |       |       |       |          |
|-------------------------------------------------|----------------------------------------------------------------------------------------|--------|--------|------|---|----|---|-------|-------|-------|-------|-------|-------|-------|----------|
| cds.Camellia_sinensis.comp11457_c0_seq1_m.35713 | PREDICTED:<br>structural maintenance of chromosomes protein 1A [Sesamum indicum]       | 19.921 | 14.027 | 43   | 9 | 10 | 9 | 1     | 0.977 | 0.991 | 1.008 | 1.01  | 1.01  | 1.02  | 9.84E-02 |
| cds.Camellia_sinensis.comp11498_c0_seq1_m.44271 | PREDICTED:<br>glucan endo-1,3-beta-glucosidase 12-like [Glycine]                       | 27.773 | 27.131 | 8.9  | 2 | 2  | 2 | 0.942 | 0.927 | 0.942 | 1.047 | 1.084 | 1.086 | 1.144 | 4.97E-04 |
| cds.Camellia_sinensis.comp11527_c0_seq1_m.47902 | PREDICTED:<br>molybdopterin synthase sulfur carrier subunit [Ipomoea nil]              | 11.663 | 3.8458 | 9.4  | 1 | 1  | 1 | 0.978 | 0.897 | 0.898 | 1.065 | 1.081 | 1.109 | 1.174 | 6.54E-03 |
| cds.Camellia_sinensis.comp11529_c0_seq2_m.48725 | PREDICTED:<br>peptidyl-prolyl cis-trans isomerase FKBP12 [Fragaria vesca subsp. vesca] | 11.929 | 44.809 | 30.4 | 3 | 13 | 3 | 0.995 | 0.987 | 1.011 | 1     | 1.011 | 1.018 | 1.012 | 2.43E-01 |



|                                |                   |                                                                                                      |        |        |      |   |    |   |       |       |       |       |       |       |       |          |
|--------------------------------|-------------------|------------------------------------------------------------------------------------------------------|--------|--------|------|---|----|---|-------|-------|-------|-------|-------|-------|-------|----------|
| cds.Camellia_sinensis.comp1159 | 7_c0_seq1_m.23792 | PREDICTED:<br>putative MO25-like protein<br>At5g47540 [Vitis vinifera]                               | 39.236 | 9.8383 | 18.8 | 7 | 13 | 7 | 0.927 | 0.952 | 0.966 | 1.056 | 1.052 | 1.021 | 1.1   | 4.10E-03 |
| cds.Camellia_sinensis.comp1162 | 8_c0_seq1_m.34499 | PREDICTED:<br>vacuolar protein sorting-associated protein 28 homolog 1 [Populus euphratica]          | 23.354 | 3.7567 | 12   | 2 | 2  | 2 | 0.853 | 1.064 | 1.016 | 1.151 | 1.022 | 0.933 | 1.059 | 5.57E-01 |
| cds.Camellia_sinensis.comp1163 | 9_c0_seq1_m.49146 | PREDICTED:<br>probable plastid-lipid-associated protein 4, chloroplastic isoform X2 [Vitis vinifera] | 19.698 | 4.8786 | 9.1  | 2 | 6  | 2 | 1.043 | 1.022 | 0.971 | 0.928 | 1.059 | 0.931 | 0.961 | 4.44E-01 |
| cds.Camellia_sinensis.comp1166 | 1_c0_seq2_m.16778 | PREDICTED:<br>protochlorophyllide-dependent translocon component 52, chloroplastic [Vitis vinifera]  | 66.107 | 9.7587 | 9.8  | 7 | 8  | 6 | 1.02  | 1.015 | 1.002 | 1.033 | 0.982 | 0.953 | 0.977 | 3.85E-01 |

|                                                  |                                                                                      |        |        |      |    |    |    |       |       |       |       |       |       |       |          |
|--------------------------------------------------|--------------------------------------------------------------------------------------|--------|--------|------|----|----|----|-------|-------|-------|-------|-------|-------|-------|----------|
| cds.Camellia_sinensis.comp11716_c0_seq1_m.37295  | PREDICTED: 40S ribosomal protein S7 [Nelumbo nucifera]                               | 26.673 | 10.971 | 19.4 | 5  | 8  | 5  | 1.188 | 1.23  | 1.177 | 0.751 | 0.773 | 0.773 | 0.639 | 1.55E-05 |
| cds.Camellia_sinensis.comp11738_c0_seq1_m.37320  | PREDICTED: outer envelope pore protein 16, chloroplastic [Nicotiana tomentosiformis] | 15.6   | 94.818 | 39   | 5  | 24 | 5  | 1.008 | 0.989 | 0.986 | 1.01  | 1.047 | 0.989 | 1.021 | 3.15E-01 |
| cds.Camellia_sinensis.comp117518_c0_seq1_m.43727 | PREDICTED: cytochrome P450 87A3-like [Juglans regia]                                 | 26.7   | 1.7493 | 4.7  | 2  | 2  | 2  | 0.865 | 0.824 | 0.852 | 1.094 | 1.164 | 1.254 | 1.382 | 1.54E-03 |
| cds.Camellia_sinensis.comp11764_c1_seq1_m.32328  | PREDICTED: short-chain dehydrogenase TIC 32, chloroplastic [Vitis vinifera]          | 33.759 | 159.67 | 55.8 | 13 | 40 | 13 | 1.03  | 1.011 | 1.031 | 0.975 | 0.99  | 0.966 | 0.954 | 8.02E-03 |
| cds.Camellia_sinensis.comp11800_c0_seq1_m.29878  | PREDICTED: glutathione S-transferase L3 [Vitis vinifera]                             | 31.872 | 156.82 | 47   | 15 | 64 | 14 | 0.949 | 0.908 | 0.925 | 1.062 | 1.106 | 1.085 | 1.169 | 8.40E-04 |



|                                                  |                                                                            |        |        |      |    |    |    |       |       |       |       |       |       |       |          |
|--------------------------------------------------|----------------------------------------------------------------------------|--------|--------|------|----|----|----|-------|-------|-------|-------|-------|-------|-------|----------|
| cds.Camellia_sinensis.comp1180_5_c0_seq1_m.42615 | profilin-1 [Jatropha curcas]                                               | 14.199 | 2.6814 | 24.4 | 3  | 10 | 2  | 0.977 | 0.884 | 1.086 | 1.193 | 0.967 | 0.923 | 1.046 | 6.91E-01 |
| cds.Camellia_sinensis.comp1184_3_c0_seq1_m.25706 | PREDICT ED: malate dehydrogenase, mitochondrial-like [Nelumbo nucifera]    | 36.749 | 181.98 | 40.1 | 13 | 35 | 12 | 1.028 | 1.007 | 1.027 | 0.944 | 0.976 | 1.009 | 0.957 | 9.30E-02 |
| cds.Camellia_sinensis.comp1188_4_c0_seq1_m.37327 | PREDICT ED: OTU domain-containing protein At3g57810 [Jatropha curcas]      | 26.012 | 4.7359 | 4.3  | 1  | 1  | 1  | 1.148 | 1.042 | 1.194 | 0.805 | 0.911 | 0.865 | 0.763 | 7.48E-03 |
| cds.Camellia_sinensis.comp1190_0_c0_seq1_m.29683 | PREDICT ED: peroxidase 4 [Citrus sinensis]                                 | 35.543 | 92.403 | 36.8 | 9  | 22 | 8  | 1.125 | 1.091 | 1.049 | 0.908 | 0.876 | 0.901 | 0.822 | 1.06E-03 |
| cds.Camellia_sinensis.comp1193_4_c0_seq1_m.57022 | PREDICT ED: heat shock cognate 70 kDa protein 2-like [Erythranthe guttata] | 12.911 | 8.5621 | 53.8 | 5  | 23 | 1  | 1.065 | 1.041 | 0.973 | 0.93  | 1.02  | 0.964 | 0.946 | 2.23E-01 |



|                                                 |                                                                                       |        |        |      |   |    |   |       |       |       |       |       |       |       |          |
|-------------------------------------------------|---------------------------------------------------------------------------------------|--------|--------|------|---|----|---|-------|-------|-------|-------|-------|-------|-------|----------|
| cds.Camellia_sinensis.comp12035_c0_seq1_m.47225 | PREDICTED:<br>photosystem I reaction center subunit V, chloroplastic [Vitis vinifera] | 15.891 | 12.339 | 17.8 | 3 | 4  | 3 | 0.928 | 0.99  | 0.985 | 1.007 | 1.065 | 0.998 | 1.058 | 1.27E-01 |
| cds.Camellia_sinensis.comp12046_c0_seq1_m.35841 | PREDICTED:<br>HMG1/2-like protein isoform X2 [Vitis vinifera]                         | 24.621 | 4.1536 | 12.7 | 3 | 3  | 2 | 0.919 | 1.002 | 1.037 | 0.971 | 0.999 | 1.089 | 1.034 | 5.36E-01 |
| cds.Camellia_sinensis.comp12057_c0_seq1_m.27251 | cysteine protease RD19A-like [Cajanus cajan]                                          | 45.032 | 16.485 | 14.4 | 6 | 12 | 4 | 1.053 | 1.02  | 1.001 | 0.928 | 1.001 | 0.981 | 0.947 | 1.11E-01 |
| cds.Camellia_sinensis.comp12070_c0_seq1_m.37627 | PREDICTED:<br>protein CURVATURE THYLAKOID 1B, chloroplastic [Juglans regia]           | 18.713 | 7.7143 | 13.6 | 4 | 10 | 4 | 1.046 | 1.002 | 1.046 | 0.984 | 0.985 | 0.964 | 0.948 | 2.88E-02 |

|                       |                                                                                                                |        |        |      |    |     |    |       |       |       |       |       |       |       |          |
|-----------------------|----------------------------------------------------------------------------------------------------------------|--------|--------|------|----|-----|----|-------|-------|-------|-------|-------|-------|-------|----------|
| cds.Camellia_sinensis | PREDICT<br>ED:<br>probable<br>carboxylesterase 5<br>[Juglans regia]                                            | 33.135 | 145.62 | 56.2 | 15 | 57  | 15 | 1.047 | 1.06  | 1.045 | 0.954 | 0.93  | 0.953 | 0.9   | 3.64E-04 |
| cds.Camellia_sinensis | PREDICT<br>ED:<br>glyceraldehyde-3-phosphate<br>dehydrogenase A,<br>chloroplastic<br>[Nelumbo nucifera]        | 43.261 | 323.31 | 49.1 | 19 | 127 | 16 | 0.995 | 1     | 1.002 | 1.003 | 0.989 | 1.004 | 1     | 9.50E-01 |
| cds.Camellia_sinensis | PREDICT<br>ED:<br>leucoanthocyanidin<br>reductase<br>[Theobroma cacao]                                         | 37.588 | 1.2298 | 4.1  | 2  | 2   | 2  | 1.429 | 1.296 | 1.581 | 0.591 | 0.449 | 0.524 | 0.363 | 4.95E-04 |
| cds.Camellia_sinensis | PREDICT<br>ED: stress-response<br>A/B barrel<br>domain-containing<br>protein<br>At5g22580<br>[Theobroma cacao] | 12.035 | 9.14   | 35.8 | 3  | 4   | 3  | 0.968 | 0.924 | 0.998 | 1.026 | 1.11  | 0.99  | 1.082 | 1.27E-01 |

|                                                  |                                                                                     |        |        |      |    |     |    |       |       |       |       |       |       |       |          |
|--------------------------------------------------|-------------------------------------------------------------------------------------|--------|--------|------|----|-----|----|-------|-------|-------|-------|-------|-------|-------|----------|
|                                                  | PREDICT<br>ED:                                                                      |        |        |      |    |     |    |       |       |       |       |       |       |       |          |
| cds.Camellia_sinensis.comp1219_2_c0_seq1_m.22171 | fructose-bisphosphate aldolase 1, chloroplastic<br>[Solanum pennellii]              | 42.925 | 323.31 | 63.2 | 21 | 101 | 20 | 1.051 | 1.044 | 1.042 | 0.93  | 0.957 | 0.938 | 0.901 | 2.97E-04 |
|                                                  | PREDICT<br>ED:                                                                      |        |        |      |    |     |    |       |       |       |       |       |       |       |          |
| cds.Camellia_sinensis.comp1220_8_c0_seq1_m.38668 | photosystem I reaction center subunit N, chloroplastic-like<br>[Gossypium hirsutum] | 18.763 | 55.291 | 33.9 | 6  | 30  | 6  | 0.99  | 0.989 | 1.004 | 1.013 | 1.004 | 0.983 | 1.006 | 6.09E-01 |
|                                                  | PREDICT<br>ED:                                                                      |        |        |      |    |     |    |       |       |       |       |       |       |       |          |
| cds.Camellia_sinensis.comp1224_3_c0_seq1_m.43261 | photosystem II repair protein PSB27-H1, chloroplastic<br>[Solanum pennellii]        | 21.983 | 80.639 | 23.3 | 6  | 28  | 6  | 1.021 | 1.019 | 0.988 | 1.004 | 1.007 | 0.998 | 0.994 | 6.03E-01 |

|                                |                                                                     |        |        |      |    |    |    |       |       |       |       |       |       |       |          |
|--------------------------------|---------------------------------------------------------------------|--------|--------|------|----|----|----|-------|-------|-------|-------|-------|-------|-------|----------|
| cds.Camellia_sinensis.comp1229 | RUBISCO SUBUNIT BINDING-protein ALPHA SUBUNIT [Populus trichocarpa] | 62.205 | 323.31 | 42.5 | 22 | 74 | 21 | 1.025 | 0.988 | 0.994 | 1.007 | 1.016 | 0.987 | 1.001 | 9.45E-01 |
| cds.Camellia_sinensis.comp1231 | PREDICTED: probable fructokinase-4 [Vitis vinifera]                 | 34.089 | 90.402 | 44.3 | 11 | 25 | 11 | 1.037 | 1.107 | 1.042 | 0.929 | 0.936 | 0.924 | 0.875 | 3.42E-03 |
| cds.Camellia_sinensis.comp1237 | PREDICTED: patellin-3-like [Gossypium arboreum]                     | 64.688 | 110.89 | 43.4 | 21 | 36 | 20 | 0.871 | 0.863 | 0.889 | 1.115 | 1.153 | 1.163 | 1.308 | 6.31E-05 |
| cds.Camellia_sinensis.comp1239 | PREDICTED: T-complex protein 1 subunit beta [Ziziphus jujuba]       | 57.154 | 181.76 | 45.9 | 21 | 40 | 21 | 0.941 | 0.969 | 0.922 | 1.057 | 1.048 | 1.064 | 1.119 | 1.72E-03 |

|                                                  |                                                                                                                   |        |        |      |    |    |    |       |       |       |       |       |       |       |          |
|--------------------------------------------------|-------------------------------------------------------------------------------------------------------------------|--------|--------|------|----|----|----|-------|-------|-------|-------|-------|-------|-------|----------|
| cds.Camellia_sinensis.comp1244_1_c0_seq1_m.14154 | PREDICTED:<br>bifunctional 3-dehydroquininate dehydratase/shikimate dehydrogenase, chloroplastic [Vitis vinifera] | 58.235 | 113.88 | 32.7 | 17 | 30 | 16 | 1.237 | 1.275 | 1.282 | 0.707 | 0.716 | 0.69  | 0.557 | 1.48E-06 |
| cds.Camellia_sinensis.comp1244_2_c0_seq1_m.43097 | PREDICTED:<br>probable xyloglucan endotransglucosylase/hydrolase protein 7 [Prunus mume]                          | 31.109 | 10.601 | 22.1 | 4  | 7  | 2  | 0.993 | 0.836 | 1.026 | 1.15  | 1.073 | 0.955 | 1.113 | 2.65E-01 |
| cds.Camellia_sinensis.comp1244_3_c0_seq1_m.27897 | PREDICTED:<br>chloroplast stem-loop binding protein of 41 kDa a, chloroplastic-like [Populus euphratica]          | 43.629 | 157.32 | 44.8 | 17 | 54 | 17 | 1.04  | 1.023 | 1.036 | 0.954 | 0.979 | 0.968 | 0.936 | 1.82E-03 |

|                                |                                                                                                     |        |        |      |   |   |   |       |       |       |       |       |       |       |          |
|--------------------------------|-----------------------------------------------------------------------------------------------------|--------|--------|------|---|---|---|-------|-------|-------|-------|-------|-------|-------|----------|
| cds.Camellia_sinensis.comp1247 | PREDICT<br>ED:<br>glucan<br>endo-1,3-<br>beta-<br>glucosidas<br>e 7-like<br>[Jatropha<br>PREDICT    | 28.881 | 3.5986 | 7.4  | 2 | 3 | 1 |       |       |       |       |       |       |       |          |
| cds.Camellia_sinensis.comp1250 | PREDICT<br>ED: serine<br>carboxype<br>ptidase-<br>like 7<br>[Vitis<br>vinifera]<br>PREDICT          | 54.522 | 17.149 | 11.5 | 5 | 5 | 5 | 1.056 | 1.042 | 1.002 | 0.927 | 0.993 | 0.925 | 0.918 | 3.75E-02 |
| cds.Camellia_sinensis.comp1257 | PREDICT<br>ED:<br>transcripti<br>on factor<br>VIP1<br>[Vitis<br>vinifera]<br>PREDICT                | 37.75  | 7.2577 | 7.9  | 3 | 6 | 3 | 1.038 | 1.032 | 1.055 | 0.978 | 0.941 | 0.989 | 0.931 | 1.18E-02 |
| cds.Camellia_sinensis.comp1260 | PREDICT<br>ED:<br>coatomer<br>subunit<br>delta<br>[Prunus<br>mume]<br>PREDICT                       | 13.687 | 2.1048 | 17.6 | 2 | 2 | 1 | 1.079 | 0.987 | 1.028 | 0.9   | 0.983 | 1.012 | 0.936 | 2.00E-01 |
| cds.Camellia_sinensis.comp1261 | PREDICT<br>ED:<br>protein<br>BOLA4,<br>chloroplast<br>ic/mitocho<br>ndrial<br>[Ricinus<br>communis] | 20.032 | 29.401 | 17.2 | 2 | 3 | 2 | 1.015 | 1.083 | 0.97  | 0.987 | 0.953 | 0.985 | 0.953 | 2.40E-01 |



|                                                 |                                                                                                                     |        |        |      |    |    |    |       |       |       |       |       |       |       |          |
|-------------------------------------------------|---------------------------------------------------------------------------------------------------------------------|--------|--------|------|----|----|----|-------|-------|-------|-------|-------|-------|-------|----------|
| cds.Camellia_sinensis.comp12679_c0_seq1_m.35855 | PREDICTED:<br>aquaporin TIP1-3<br>[Eucalyptus grandis<br>Rieske (2Fe-2S)<br>domain protein<br>[Medicago truncatula] | 26.001 | 3.5046 | 6.3  | 2  | 3  | 2  | 0.853 | 0.798 | 0.853 | 1.104 | 1.169 | 1.278 | 1.418 | 1.92E-03 |
| cds.Camellia_sinensis.comp12682_c0_seq1_m.34284 | F1N21.17<br>[Arabidopsis lyrata subsp. lyrata]                                                                      | 31.181 | 224.77 | 48.3 | 11 | 44 | 11 | 1.026 | 1.037 | 1.043 | 0.971 | 0.963 | 0.964 | 0.933 | 2.22E-04 |
| cds.Camellia_sinensis.comp12697_c0_seq1_m.39056 | PREDICTED:<br>nitronate monooxygenase<br>[Daucus carota subsp. sativus]                                             | 11.838 | 26.808 | 47.5 | 3  | 5  | 3  | 1.014 | 1.076 | 1.038 | 0.947 | 0.933 | 0.982 | 0.915 | 1.81E-02 |
| cds.Camellia_sinensis.comp12720_c0_seq1_m.56493 | PREDICTED:<br>cytochrome c oxidase subunit 6b-1<br>[Sesamum indicum]                                                | 12.511 | 7.9073 | 9.5  | 1  | 1  | 1  | 0.901 | 0.976 | 0.902 | 1.143 | 1.081 | 1.038 | 1.174 | 1.41E-02 |
| cds.Camellia_sinensis.comp12723_c0_seq1_m.32948 |                                                                                                                     | 19.951 | 8.4083 | 22.7 | 4  | 8  | 4  | 0.993 | 1.029 | 1.043 | 0.98  | 0.964 | 0.94  | 0.941 | 3.30E-02 |

|                                |                                                                                                                   |        |        |      |    |    |   |       |       |       |       |       |       |       |          |
|--------------------------------|-------------------------------------------------------------------------------------------------------------------|--------|--------|------|----|----|---|-------|-------|-------|-------|-------|-------|-------|----------|
| cds.Camellia_sinensis.comp1273 | PREDICT<br>ED: 40S<br>ribosomal<br>protein S3-3-like<br>[Nelumbo nucifera]                                        | 21.394 | 39.616 | 73.4 | 12 | 20 | 7 | 0.99  | 0.995 | 0.983 | 1.043 | 1.047 | 1.002 | 1.042 | 4.82E-02 |
| cds.Camellia_sinensis.comp1275 | PREDICT<br>ED:<br>transmemb<br>rane<br>emp24<br>domain-<br>containing<br>protein<br>p24delta3<br>[Vitis vinifera] | 24.849 | 4.1806 | 11.4 | 3  | 4  | 3 | 0.969 | 0.952 | 0.955 | 1.047 | 1.036 | 0.997 | 1.071 | 1.25E-02 |
| cds.Camellia_sinensis.comp1276 | PREDICT<br>ED:<br>vegetative<br>cell wall<br>protein<br>gp1<br>[Capsicum annuum]                                  | 13.5   | 17.706 | 30.5 | 4  | 8  | 4 | 1.017 | 0.994 | 1.008 | 0.982 | 0.979 | 0.983 | 0.975 | 2.07E-02 |
| cds.Camellia_sinensis.comp1278 | PREDICT<br>ED:<br>dihydrofla<br>vonol-4-<br>reductase-<br>like<br>[Daucus carota subsp. sativus]                  | 38.694 | 20.965 | 19.6 | 9  | 16 | 9 | 1.433 | 1.386 | 1.417 | 0.53  | 0.54  | 0.534 | 0.379 | 5.31E-08 |



|                                                  |                                                                                        |        |        |      |    |    |    |       |       |       |       |       |       |       |          |
|--------------------------------------------------|----------------------------------------------------------------------------------------|--------|--------|------|----|----|----|-------|-------|-------|-------|-------|-------|-------|----------|
| cds.Camellia_sinensis.comp1295_4_c0_seq1_m.32734 | PREDICT ED:<br>histone H1-like isoform X1<br>[Ipomoea nil]                             | 29.007 | 11.118 | 23.9 | 7  | 10 | 7  | 1.05  | 1.019 | 1.07  | 0.943 | 0.927 | 0.966 | 0.903 | 5.46E-03 |
| cds.Camellia_sinensis.comp1302_2_c0_seq1_m.21360 | PREDICT ED:<br>rhodanese-like domain-containing protein 4, chloroplastic [Prunus mume] | 47.668 | 172.77 | 34.7 | 16 | 47 | 16 | 1.003 | 0.996 | 1.008 | 0.981 | 1.019 | 0.999 | 0.997 | 8.22E-01 |
| cds.Camellia_sinensis.comp1303_6_c0_seq1_m.55058 | PREDICT ED:<br>pectinesterase<br>[Ricinus communis]                                    | 14.909 | 7.6807 | 16.8 | 2  | 3  | 2  | 0.999 | 0.994 | 0.963 | 0.996 | 0.996 | 1.048 | 1.028 | 2.45E-01 |
| cds.Camellia_sinensis.comp1304_4_c0_seq1_m.53290 | PREDICT ED:<br>putative cytochrome c oxidase subunit 5b-like<br>[Nicotiana tabacum]    | 13.886 | 31.738 | 35.2 | 4  | 8  | 4  | 1.003 | 1.09  | 1.027 | 1.025 | 0.947 | 0.907 | 0.923 | 1.36E-01 |

|                                                  |                                                                                         |        |        |      |   |    |   |       |       |       |       |       |       |       |          |
|--------------------------------------------------|-----------------------------------------------------------------------------------------|--------|--------|------|---|----|---|-------|-------|-------|-------|-------|-------|-------|----------|
| cds.Camellia_sinensis.comp1305_0_c0_seq1_m.35139 | PREDICTED:<br>methyl-CpG-binding domain-containing protein 11 [Theobroma cacao]         | 32.049 | 57.584 | 35.1 | 9 | 17 | 7 | 1.174 | 1.121 | 1.111 | 0.804 | 0.822 | 0.82  | 0.718 | 5.85E-05 |
| cds.Camellia_sinensis.comp1307_3_c0_seq1_m.39800 | PREDICTED:<br>asparagine synthetase [glutamine hydrolyzing] [Nicotiana tomentosiformis] | 26.758 | 1.7498 | 6.4  | 1 | 1  | 1 |       |       |       |       |       |       |       |          |
| cds.Camellia_sinensis.comp1307_7_c0_seq1_m.36053 | PREDICTED:<br>disease resistance protein At4g27190-like isoform X3 [Ziziphus jujuba]    | 41.085 | -2     | 3.3  | 1 | 1  | 1 | 0.983 | 0.89  | 0.939 | 1.119 | 1.125 | 0.976 | 1.145 | 7.00E-02 |



|                                |                     |                                                                                        |        |        |      |   |    |   |       |       |       |       |       |       |       |          |
|--------------------------------|---------------------|----------------------------------------------------------------------------------------|--------|--------|------|---|----|---|-------|-------|-------|-------|-------|-------|-------|----------|
| cds.Camellia_sinensis.comp1325 | 9_c0_seq1_m.37930   | PREDICT<br>ED: outer envelope pore protein 24A, chloroplast ic-like [Nelumbo nucifera] | 28.734 | 3.8169 | 3.1  | 1 | 1  | 1 | 1.01  | 1.005 | 0.909 | 0.986 | 1.024 | 1.076 | 1.055 | 2.71E-01 |
| cds.Camellia_sinensis.comp1330 | 0_c0_seq1_m.40162   | PREDICT<br>ED: glucan endo-1,3-beta-glucosidase 12 [Vitis]                             | 24.224 | 2.2618 | 4.7  | 1 | 1  | 1 | 0.845 | 0.928 | 0.913 | 1.148 | 1.16  | 1.06  | 1.254 | 5.06E-03 |
| cds.Camellia_sinensis.comp1331 | 06_c0_seq1_m.5456_9 | PREDICT<br>ED: dammarenediol II synthase-like [Sesamum indicum]                        | 14.114 | 3.3692 | 15.2 | 2 | 2  | 2 | 1.409 | 1.282 | 1.25  | 0.624 | 0.618 | 0.707 | 0.495 | 2.40E-04 |
| cds.Camellia_sinensis.comp1332 | 8_c0_seq1_m.30564   | PREDICT<br>ED: prohibitin-1, mitochondrial-like [Nicotiana tomentosiformis]            | 31.89  | 53.102 | 37.8 | 8 | 14 | 8 | 0.991 | 0.996 | 0.989 | 0.98  | 1.018 | 1.011 | 1.011 | 4.11E-01 |









|                                |                                                                             |        |        |      |    |    |    |       |       |       |       |       |       |       |          |
|--------------------------------|-----------------------------------------------------------------------------|--------|--------|------|----|----|----|-------|-------|-------|-------|-------|-------|-------|----------|
| cds.Camellia_sinensis.comp1359 | glycine-rich RNA-binding protein 2, mitochondrial-like [Populus euphratica] | 15.038 | 74.468 | 27.7 | 3  | 5  | 3  | 1.014 | 0.987 | 0.995 | 0.971 | 1.004 | 1.017 | 0.999 | 9.31E-01 |
| cds.Camellia_sinensis.comp1360 | probable prefoldin subunit 4 [Nelumbo nucifera]                             | 14.742 | 40.049 | 29.4 | 3  | 6  | 3  | 0.955 | 0.977 | 0.967 | 1.099 | 1.029 | 0.971 | 1.069 | 1.46E-01 |
| cds.Camellia_sinensis.comp1362 | pentatricopeptide repeat-containing protein At3g49240 [Solanum]             | 64.039 | 32.252 | 18.1 | 10 | 17 | 10 | 0.979 | 1.024 | 0.967 | 1.008 | 1.011 | 0.992 | 1.014 | 4.89E-01 |
| cds.Camellia_sinensis.comp1365 | glutaredoxin-like [Juglans regia]                                           | 11.293 | 36.926 | 37.4 | 3  | 5  | 3  | 0.936 | 0.893 | 0.916 | 1.067 | 1.12  | 1.038 | 1.175 | 3.50E-03 |

|                                                 |                                                              |        |        |      |    |    |    |       |       |       |       |       |       |       |          |
|-------------------------------------------------|--------------------------------------------------------------|--------|--------|------|----|----|----|-------|-------|-------|-------|-------|-------|-------|----------|
| cds.Camellia_sinensis.comp13714_c0_seq1_m.40317 | PREDICTED: acyl-coenzyme A thioesterase 13 [Jatropha curcas] | 18.83  | 3.3492 | 6.4  | 1  | 1  | 1  | 1.022 | 1.03  | 1.03  | 0.963 | 0.99  | 0.966 | 0.947 | 3.96E-03 |
| cds.Camellia_sinensis.comp13716_c0_seq1_m.40622 |                                                              | 16.969 | 6.2586 | 16.8 | 2  | 2  | 2  | 1.132 | 1.115 | 1.021 | 0.833 | 0.945 | 0.924 | 0.827 | 1.94E-02 |
| cds.Camellia_sinensis.comp13771_c0_seq1_m.36982 | transmembrane protein, putative [Medicago truncatula]        | 30.502 | 9.6132 | 12.9 | 2  | 3  | 2  | 0.992 | 0.902 | 0.948 | 1.015 | 1.016 | 1.144 | 1.117 | 8.51E-02 |
| cds.Camellia_sinensis.comp13825_c0_seq1_m.4415  | PREDICTED: protein FAR1-RELATED SEQUENCE 3 [Vitis]           | 98.894 | 41.633 | 16.9 | 13 | 15 | 10 | 0.969 | 0.987 | 0.956 | 1.069 | 0.998 | 1.033 | 1.065 | 4.67E-02 |
| cds.Camellia_sinensis.comp13828_c0_seq1_m.31187 | PREDICTED: protein usf-like [Gossypium hirsutum]             | 32.97  | 125.84 | 42.4 | 11 | 30 | 11 | 0.976 | 0.97  | 0.966 | 1.021 | 1.064 | 1.029 | 1.069 | 6.76E-03 |

|                                                  |                                                                                          |        |        |      |    |    |    |       |       |       |       |       |       |       |          |
|--------------------------------------------------|------------------------------------------------------------------------------------------|--------|--------|------|----|----|----|-------|-------|-------|-------|-------|-------|-------|----------|
| cds.Camellia_sinensis.comp1382_9_c0_seq1_m.38050 | PREDICTED:<br>nucleoside diphosphate kinase 2, chloroplastic isoform X2 [Vitis vinifera] | 26.49  | 35.449 | 27.8 | 6  | 14 | 6  | 0.993 | 1.001 | 1.009 | 0.971 | 0.976 | 0.988 | 0.977 | 2.95E-02 |
| cds.Camellia_sinensis.comp1387_5_c0_seq1_m.28867 | PREDICTED:<br>galactinol synthase 1 [Vitis vinifera]                                     | 45.691 | 119.14 | 28.5 | 10 | 38 | 10 | 1.008 | 0.994 | 0.992 | 0.99  | 1.013 | 0.992 | 1     | 9.74E-01 |
| cds.Camellia_sinensis.comp1389_8_c0_seq1_m.43751 | PREDICTED: auxin-binding protein ABP19a-like [Nelumbo nucifera]                          | 28.03  | 23.122 | 8.4  | 3  | 13 | 3  | 0.937 | 0.91  | 0.913 | 1.079 | 1.116 | 1.088 | 1.189 | 2.23E-04 |
| cds.Camellia_sinensis.comp1395_3_c0_seq1_m.37154 | SOUL<br>heme-binding family protein [Medicago truncatula]                                | 22.706 | 12.149 | 22.4 | 4  | 4  | 4  | 0.993 | 0.954 | 0.986 | 1.008 | 0.983 | 1.052 | 1.038 | 1.92E-01 |

|                                                  |                                                                                                            |        |        |      |    |    |    |       |       |       |       |       |       |       |          |
|--------------------------------------------------|------------------------------------------------------------------------------------------------------------|--------|--------|------|----|----|----|-------|-------|-------|-------|-------|-------|-------|----------|
|                                                  | PREDICT<br>ED:<br>protein<br>FATTY<br>ACID                                                                 |        |        |      |    |    |    |       |       |       |       |       |       |       |          |
| cds.Camellia_sinensis.comp1399_4_c0_seq1_m.19902 | EXPORT<br>3,<br>chloroplast<br>ic-like<br>isoform<br>X1<br>[Nicotiana<br>tabacum]                          | 35.682 | 42.138 | 25.4 | 10 | 18 | 10 | 1.039 | 0.973 | 0.959 | 0.974 | 1.027 | 1.013 | 1.014 | 6.42E-01 |
| cds.Camellia_sinensis.comp1401_4_c0_seq1_m.31949 | PREDICT<br>ED:<br>protein<br>argonaute<br>4A [Vitis<br>vinifera]                                           | 40.561 | 3.6431 | 14.2 | 6  | 8  | 2  | 1.039 | 1.018 | 1.074 | 0.964 | 0.947 | 0.955 | 0.915 | 5.80E-03 |
| cds.Camellia_sinensis.comp1402_1_c0_seq1_m.42083 | PREDICT<br>ED:<br>protein<br>LHCP<br>TRANSL<br>OCATION<br>DEFECT<br>[Fragaria<br>vesca<br>subsp.<br>vesca] | 19.534 | 24.398 | 17.2 | 3  | 5  | 3  | 1.111 | 1.082 | 1.033 | 0.88  | 0.883 | 0.955 | 0.843 | 7.36E-03 |
| cds.Camellia_sinensis.comp1403_4_c0_seq1_m.41985 | PREDICT<br>ED:<br>inorganic<br>pyrophosp<br>hatase 2<br>[Theobroma<br>cacao]                               | 30.709 | 1.8505 | 3.7  | 1  | 1  | 1  | 1.046 | 1.07  | 1.047 | 0.876 | 0.922 | 1.025 | 0.893 | 6.88E-02 |

|                                |                                                                                  |        |        |      |   |    |   |       |       |       |       |       |       |       |          |
|--------------------------------|----------------------------------------------------------------------------------|--------|--------|------|---|----|---|-------|-------|-------|-------|-------|-------|-------|----------|
| cds.Camellia_sinensis.comp1404 | PREDICT<br>ED:<br>callose synthase 9<br>[Jatropha curcas]                        | 219.55 | 12.406 | 2.6  | 5 | 6  | 4 | 0.962 | 1.005 | 1.02  | 0.985 | 1.043 | 0.999 | 1.013 | 6.17E-01 |
| cds.Camellia_sinensis.comp1410 | PREDICT<br>ED: 50S ribosomal protein L6, chloroplastic-like<br>[Malus domestica] | 24.949 | 17.897 | 40.7 | 9 | 12 | 9 | 1.123 | 1.114 | 1.143 | 0.835 | 0.862 | 0.826 | 0.746 | 3.98E-05 |
| cds.Camellia_sinensis.comp1410 | PREDICT<br>ED: D-amino-acid transaminase, chloroplastic<br>[Vitis vinifera]      | 43.381 | 3.1102 | 2.5  | 1 | 1  | 1 |       |       |       |       |       |       |       |          |
| cds.Camellia_sinensis.comp1411 | PREDICT<br>ED:<br>pheophytinase, chloroplastic<br>[Ziziphus jujuba]              | 41.845 | 2.6148 | 4.5  | 2 | 2  | 2 | 1.088 | 1.012 | 1.018 | 0.891 | 0.973 | 1.003 | 0.919 | 1.17E-01 |

|                                                  |                                                                                            |        |        |      |    |    |    |       |       |       |       |       |       |       |          |
|--------------------------------------------------|--------------------------------------------------------------------------------------------|--------|--------|------|----|----|----|-------|-------|-------|-------|-------|-------|-------|----------|
| cds.Camellia_sinensis.comp1413.2_c0_seq2_m.40264 | PREDICTED: ATP-dependent Clp proteolytic subunit 2, mitochondrial-like [Nicotiana tabacum] | 28.391 | 15.948 | 26.7 | 6  | 9  | 6  | 1.041 | 1.027 | 0.957 | 0.976 | 1.025 | 1.007 | 0.994 | 8.71E-01 |
| cds.Camellia_sinensis.comp1415.9_c0_seq1_m.5231  | PREDICTED: protein argonaute 5 [Vitis vinifera]                                            | 109.24 | 39.289 | 13   | 13 | 17 | 13 | 0.997 | 1.003 | 1.05  | 1.008 | 0.96  | 0.989 | 0.97  | 2.27E-01 |
| cds.Camellia_sinensis.comp1416.7_c0_seq1_m.35045 | PREDICTED: glutathione S-transferase U17 [Eucalyptus grandis]                              | 25.834 | 33.405 | 19.5 | 5  | 8  | 5  | 1.064 | 1.078 | 1.037 | 0.963 | 0.884 | 0.967 | 0.885 | 1.74E-02 |
| cds.Camellia_sinensis.comp1420.1_c0_seq1_m.20780 | PREDICTED: hydroquinone glucosyltransferase-like [Nicotiana glauca]                        | 58.009 | 4.1695 | 6.1  | 4  | 4  | 3  | 1.061 | 1.119 | 1.038 | 0.944 | 0.917 | 0.886 | 0.854 | 5.42E-03 |



|                                |                                                                                                                               |        |        |      |   |    |   |       |       |       |       |       |       |       |          |
|--------------------------------|-------------------------------------------------------------------------------------------------------------------------------|--------|--------|------|---|----|---|-------|-------|-------|-------|-------|-------|-------|----------|
| cds.Camellia_sinensis.comp1427 | PREDICT<br>ED: enoyl-<br>[acyl-<br>carrier-<br>protein]<br>reductase<br>[NADH],<br>chloroplast<br>ic<br>[Nelumbo<br>nucifera] | 31.24  | 6.3352 | 31.4 | 9 | 25 | 3 | 1.012 | 1.036 | 0.98  | 1.055 | 1.018 | 0.935 | 0.993 | 8.55E-01 |
| cds.Camellia_sinensis.comp1427 | PREDICT<br>ED: zinc<br>finger<br>CCCH<br>domain-<br>containing<br>protein 37<br>isoform<br>X1<br>[Nelumbo<br>nucifera]        | 58.591 | 68.879 | 12.9 | 6 | 8  | 6 | 0.979 | 1.021 | 0.981 | 1.005 | 0.992 | 0.994 | 1.003 | 8.17E-01 |
| cds.Camellia_sinensis.comp1430 | centrosom<br>al protein<br>[Arabidop<br>sis<br>thaliana]                                                                      | 17.68  | 1.8398 | 12.5 | 2 | 2  | 2 |       |       |       |       |       |       |       |          |
| cds.Camellia_sinensis.comp1430 |                                                                                                                               | 12.959 | 49.047 | 26   | 3 | 5  | 3 | 1.149 | 1.123 | 1.164 | 0.844 | 0.808 | 0.854 | 0.729 | 9.55E-05 |

|                                                  |                                                                                               |        |        |      |    |    |    |       |       |       |       |       |       |       |          |
|--------------------------------------------------|-----------------------------------------------------------------------------------------------|--------|--------|------|----|----|----|-------|-------|-------|-------|-------|-------|-------|----------|
| cds.Camellia_sinensis.comp1435_0_c0_seq1_m.44674 | PREDICTED: CAP-Gly domain-containing linker protein 1 isoform X1 [Sesamum indicum] chromosome | 16.367 | 75.071 | 25.3 | 3  | 5  | 3  | 0.956 | 1.008 | 0.999 | 1.077 | 0.973 | 1.031 | 1.04  | 3.17E-01 |
| cds.Camellia_sinensis.comp1436_4_c0_seq1_m.35071 | me-associated kinesin [Arabidopsis thaliana]                                                  | 28.048 | 52.699 | 30   | 7  | 8  | 7  | 1.009 | 0.974 | 1.036 | 0.97  | 0.974 | 1.013 | 0.979 | 4.13E-01 |
| cds.Camellia_sinensis.comp1442_8_c0_seq1_m.32371 | PREDICTED: protein-L-isoaspartate O-methyltransferase 1 isoform X2 [Sesamum indicum]          | 33.385 | 12.93  | 17.6 | 5  | 5  | 5  | 0.96  | 0.959 | 0.99  | 1.083 | 0.981 | 1.025 | 1.062 | 1.23E-01 |
| cds.Camellia_sinensis.comp1448_7_c0_seq1_m.36591 | triosephosphate isomerase, cytosolic [Capsicum annuum]                                        | 27.853 | 219.05 | 53.5 | 11 | 43 | 11 | 1.024 | 1.003 | 0.995 | 1     | 0.997 | 0.985 | 0.987 | 2.44E-01 |
| cds.Camellia_sinensis.comp1453_0_c0_seq1_m.42158 | Thioredoxin-like protein 4A [Morus notabilis]                                                 | 16.561 | 1.899  | 9.9  | 1  | 1  | 1  | 0.845 | 1.177 | 0.822 | 1.08  | 1.038 | 1.07  | 1.121 | 3.85E-01 |





|                                |                                                                      |        |        |      |   |    |   |       |       |       |       |       |       |       |          |
|--------------------------------|----------------------------------------------------------------------|--------|--------|------|---|----|---|-------|-------|-------|-------|-------|-------|-------|----------|
| cds.Camellia_sinensis.comp1467 | PREDICT ED: peroxidase 4-like [Vitis vinifera]                       | 17.319 | 42.14  | 44.8 | 6 | 10 | 4 | 0.979 | 1.025 | 1.084 | 0.919 | 0.946 | 1.042 | 0.941 | 2.73E-01 |
| cds.Camellia_sinensis.comp1468 | Chaperone protein DnaJ [Morus notabilis]                             | 57.761 | 11.501 | 13   | 7 | 8  | 7 | 1.112 | 1.034 | 1.129 | 0.936 | 0.859 | 0.902 | 0.824 | 6.20E-03 |
| cds.Camellia_sinensis.comp1469 | myosin-G heavy chain-like protein [Arabidopsis thaliana]             | 16.92  | 1.4243 | 9.6  | 1 | 1  | 1 |       |       |       |       |       |       |       |          |
| cds.Camellia_sinensis.comp1470 | PREDICT ED: hydroquinone glucosyltransferase-like [Nicotiana glauca] | 32.264 | 6.2764 | 11.6 | 4 | 5  | 2 |       |       |       |       |       |       |       |          |
| cds.Camellia_sinensis.comp1470 | Sugar transport protein 5 [Morus notabilis]                          | 43.697 | 4.1782 | 3.6  | 1 | 1  | 1 | 1.047 | 1.061 | 1.036 | 0.957 | 0.945 | 0.947 | 0.906 | 2.41E-04 |
| cds.Camellia_sinensis.comp1470 | PREDICT ED: 60S ribosomal protein L26-1-like [Nicotiana glauca]      | 20.09  | 8.8667 | 22.5 | 4 | 9  | 4 | 1.053 | 1.059 | 1.01  | 0.96  | 0.943 | 0.922 | 0.905 | 6.22E-03 |

|                                                                                                             |                   |        |        |      |    |    |    |       |       |       |       |       |       |       |          |
|-------------------------------------------------------------------------------------------------------------|-------------------|--------|--------|------|----|----|----|-------|-------|-------|-------|-------|-------|-------|----------|
| cds.Camellia_sinensis.comp1474                                                                              | 1_c0_seq1_m.57407 | 12.794 | 4.354  | 43.5 | 5  | 9  | 2  | 0.876 | 0.844 | 1.141 | 1.109 | 1.201 | 0.877 | 1.114 | 4.63E-01 |
| PREDICT<br>ED:<br>proteasome subunit alpha type-3-like<br>[Populus euphratica]                              |                   |        |        |      |    |    |    |       |       |       |       |       |       |       |          |
| cds.Camellia_sinensis.comp1476                                                                              | 0_c0_seq1_m.25844 | 41.721 | 2.1041 | 2.5  | 1  | 1  | 1  | 0.994 | 0.971 | 0.989 | 0.973 | 1.055 | 1.029 | 1.035 | 2.48E-01 |
| PREDICT<br>ED:<br>mitochondrial import inner membrane translocase subunit TIM50-like<br>[Solanum tuberosum] |                   |        |        |      |    |    |    |       |       |       |       |       |       |       |          |
| cds.Camellia_sinensis.comp1476                                                                              | 1_c0_seq1_m.43823 | 21.999 | 9.8489 | 9.5  | 2  | 2  | 2  | 0.969 | 0.997 | 0.99  | 0.99  | 1.033 | 1.035 | 1.035 | 1.15E-01 |
| PREDICT<br>ED:<br>pyruvate kinase isozyme G,<br>chloroplastic<br>[Theobroma]                                |                   |        |        |      |    |    |    |       |       |       |       |       |       |       |          |
| cds.Camellia_sinensis.comp1477                                                                              | 1_c0_seq1_m.16671 | 57.801 | 286.17 | 49.7 | 21 | 62 | 21 | 0.997 | 1.033 | 1.013 | 1.006 | 0.972 | 1.005 | 0.98  | 2.61E-01 |
| PREDICT<br>ED:<br>NADP-dependent glyceraldehyde-3-phosphate dehydrogenase<br>[Sesamum indicum]              |                   |        |        |      |    |    |    |       |       |       |       |       |       |       |          |

|                                                                                            |                   |        |        |      |   |    |   |       |       |       |       |       |       |       |          |
|--------------------------------------------------------------------------------------------|-------------------|--------|--------|------|---|----|---|-------|-------|-------|-------|-------|-------|-------|----------|
| cds.Camellia_sinensis.comp1477                                                             | 8_c0_seq1_m.21986 | 34.961 | 32.52  | 9.5  | 3 | 5  | 3 | 0.94  | 0.962 | 0.999 | 1.037 | 1.048 | 1.023 | 1.071 | 2.22E-02 |
| PREDICT<br>ED:<br>phytochrome-associated serine/threonine-protein phosphatase<br>[Ipomoea] |                   |        |        |      |   |    |   |       |       |       |       |       |       |       |          |
| cds.Camellia_sinensis.comp1477                                                             | 9_c0_seq1_m.55154 | 13.848 | 1.7459 | 8.2  | 1 | 1  | 1 | 1.079 | 1.108 | 1.064 | 1.036 | 0.748 | 0.949 | 0.841 | 2.03E-01 |
| ED: AAA-ATPase 0-like<br>[Juglans regia]                                                   |                   |        |        |      |   |    |   |       |       |       |       |       |       |       |          |
| cds.Camellia_sinensis.comp1479                                                             | 4_c0_seq1_m.31056 | 42.705 | 127.24 | 21.7 | 7 | 18 | 7 | 0.935 | 0.958 | 0.963 | 1.076 | 1.061 | 1.026 | 1.107 | 3.72E-03 |
| PREDICT<br>ED:<br>glutathionyl-hydroquinone reductase YqjG<br>[Ricinus communis]           |                   |        |        |      |   |    |   |       |       |       |       |       |       |       |          |
| cds.Camellia_sinensis.comp1480                                                             | 3_c0_seq2_m.38105 | 23.159 | 21.482 | 18.4 | 3 | 5  | 3 | 0.958 | 0.97  | 0.929 | 1.079 | 0.993 | 1.096 | 1.109 | 3.66E-02 |
| PREDICT<br>ED:<br>ubiquitin thioesterase OTU1 isoform X1<br>[Nicotiana attenuata]          |                   |        |        |      |   |    |   |       |       |       |       |       |       |       |          |

|                                |                   |                                                                                    |        |        |      |   |    |   |       |       |       |       |       |       |       |          |
|--------------------------------|-------------------|------------------------------------------------------------------------------------|--------|--------|------|---|----|---|-------|-------|-------|-------|-------|-------|-------|----------|
| cds.Camellia_sinensis.comp1482 | 7_c0_seq1_m.33282 | PREDICTED: chlorophyll a-b binding protein 6A, chloroplastic [Nicotiana attenuata] | 26.332 | 36.237 | 21.2 | 9 | 29 | 9 | 0.947 | 0.896 | 0.882 | 1.09  | 1.122 | 1.103 | 1.217 | 1.06E-03 |
| cds.Camellia_sinensis.comp1484 | 9_c0_seq1_m.54978 | PREDICTED: HMG-Y-related protein A [Theobroma cacao]                               | 14.829 | 3.189  | 10.9 | 1 | 1  | 1 | 0.962 | 1.355 | 1.214 | 0.823 | 0.859 | 0.761 | 0.692 | 2.83E-02 |
| cds.Camellia_sinensis.comp1485 | 6_c0_seq1_m.31110 | PREDICTED: BAHD acyltransferase DCR [Ricinus communis]                             | 48.112 | 1.166  | 3    | 1 | 1  | 1 |       |       |       |       |       |       |       |          |
| cds.Camellia_sinensis.comp1486 | 6_c0_seq1_m.29987 | PREDICTED: chlorophyll a-b binding protein 7, chloroplastic [Solanum tuberosum]    | 33.769 | 72.027 | 23.7 | 4 | 14 | 4 | 0.97  | 0.943 | 0.979 | 0.994 | 1.018 | 1.031 | 1.052 | 3.07E-02 |



|                                |                   |                                                                                                                                                           |        |        |      |    |    |    |       |       |       |       |       |       |       |          |
|--------------------------------|-------------------|-----------------------------------------------------------------------------------------------------------------------------------------------------------|--------|--------|------|----|----|----|-------|-------|-------|-------|-------|-------|-------|----------|
| cds.Camellia_sinensis.comp1486 | 8_c0_seq1_m.51576 | PREDICT ED: heavy metal-associated isoprenylated plant protein 26-like [Sesamum indicum] serine carboxypeptidase S10 family protein [Populus trichocarpa] | 15.323 | 1.323  | 5.1  | 1  | 1  | 1  | 1.373 | 1.289 | 1.244 | 0.632 | 0.668 | 0.691 | 0.51  | 6.24E-05 |
| cds.Camellia_sinensis.comp1488 | 5_c0_seq1_m.20656 | PREDICT ED: glutamine-dependent NAD(+) synthetase [Sesamum indicum]                                                                                       | 51.194 | 15.302 | 6.3  | 3  | 4  | 3  | 1.039 | 1.043 | 1.045 | 0.946 | 0.96  | 0.99  | 0.926 | 2.95E-02 |
| cds.Camellia_sinensis.comp1490 | 0_c0_seq1_m.9568  | PREDICT ED: 26S protease regulatory subunit 7 [Gossypium hirsutum]                                                                                        | 89.256 | 5.7361 | 3.1  | 3  | 4  | 3  | 0.972 | 1.023 | 1.019 | 1.006 | 0.988 | 0.976 | 0.985 | 4.80E-01 |
| cds.Camellia_sinensis.comp1494 | 8_c0_seq1_m.21121 |                                                                                                                                                           | 47.654 | 165.82 | 55.9 | 22 | 48 | 21 | 1.004 | 1.018 | 1.019 | 1.008 | 0.986 | 1.007 | 0.987 | 2.00E-01 |

|                             |                                                                      |        |        |      |    |    |   |       |       |       |       |       |       |       |          |
|-----------------------------|----------------------------------------------------------------------|--------|--------|------|----|----|---|-------|-------|-------|-------|-------|-------|-------|----------|
|                             | PREDICT                                                              |        |        |      |    |    |   |       |       |       |       |       |       |       |          |
| cds.Camellia_sinensis       | ED: probable carboxylase 8                                           |        |        |      |    |    |   |       |       |       |       |       |       |       |          |
| .comp1495_2_c0_seq1_m.34818 | [Theobroma cacao]                                                    | 37.333 | 2.5966 | 4.7  | 1  | 2  | 1 | 1.029 | 0.979 | 1.107 | 1.054 | 0.789 | 1.042 | 0.926 | 4.53E-01 |
|                             | PREDICT                                                              |        |        |      |    |    |   |       |       |       |       |       |       |       |          |
| cds.Camellia_sinensis       | ED: thioredoxin X, chloroplastic                                     |        |        |      |    |    |   |       |       |       |       |       |       |       |          |
| .comp1498_5_c0_seq1_m.42840 | [Prunus mume]                                                        | 21.136 | 21.583 | 15.4 | 3  | 6  | 3 | 0.957 | 1.042 | 0.996 | 0.967 | 1.04  | 0.956 | 0.989 | 7.79E-01 |
|                             | PREDICT                                                              |        |        |      |    |    |   |       |       |       |       |       |       |       |          |
| cds.Camellia_sinensis       | ED: ribulose biphosphate carboxylase small chain, chloroplastic-like |        |        |      |    |    |   |       |       |       |       |       |       |       |          |
| .comp1498_6_c0_seq1_m.37943 | [Juglans regia]                                                      | 19.795 | 23.148 | 40.3 | 10 | 96 | 6 | 0.997 | 1.029 | 1.061 | 0.982 | 0.979 | 0.969 | 0.949 | 4.79E-02 |
|                             | PREDICT                                                              |        |        |      |    |    |   |       |       |       |       |       |       |       |          |
| cds.Camellia_sinensis       | ED: nudix hydrolase 26, chloroplastic-like isoform X2                |        |        |      |    |    |   |       |       |       |       |       |       |       |          |
| .comp1503_3_c0_seq1_m.11003 | [Nicotiana attenuata]                                                | 20.647 | 2.9544 | 11.6 | 1  | 1  | 1 | 1.255 | 0.954 | 1.01  | 0.974 | 0.774 | 0.998 | 0.853 | 2.46E-01 |

|                                                  |                                                                                           |        |        |      |   |    |   |       |       |       |       |       |       |       |          |
|--------------------------------------------------|-------------------------------------------------------------------------------------------|--------|--------|------|---|----|---|-------|-------|-------|-------|-------|-------|-------|----------|
| cds.Camellia_sinensis.comp1503_3_c0_seq1_m.11004 | PREDICTED:<br>photosystem II 10 kDa polypeptide, chloroplastic [Juglans regia]            | 14.263 | 26.492 | 23.2 | 3 | 13 | 3 | 1.13  | 1.056 | 1.106 | 0.885 | 0.916 | 0.884 | 0.816 | 9.21E-04 |
| cds.Camellia_sinensis.comp1503_7_c0_seq1_m.35395 | PREDICTED:<br>thylakoid membrane protein slr0575 [Solanum tuberosum]                      | 31.624 | 89.845 | 34.1 | 9 | 17 | 9 | 0.981 | 1.035 | 1.009 | 1.006 | 1.024 | 0.972 | 0.992 | 7.44E-01 |
| cds.Camellia_sinensis.comp1507_8_c0_seq1_m.40747 | PREDICTED:<br>putative 4-hydroxy-4-methyl-2-oxoglutarate aldolase 2 [Nicotiana attenuata] | 17.8   | 23.837 | 37.3 | 6 | 8  | 5 | 1.008 | 1     | 1.001 | 0.982 | 0.969 | 1.005 | 0.982 | 1.78E-01 |
| cds.Camellia_sinensis.comp1507_9_c0_seq1_m.27628 | PREDICTED:<br>bifunctional protein FoLD 4, chloroplastic isoform X2 [Citrus sinensis]     | 38.976 | 37.062 | 22   | 9 | 15 | 9 | 1     | 1.046 | 1.009 | 0.951 | 0.972 | 0.977 | 0.949 | 3.17E-02 |

|                                |                   |                                                                                                |        |        |      |    |    |    |       |       |       |       |       |       |       |          |
|--------------------------------|-------------------|------------------------------------------------------------------------------------------------|--------|--------|------|----|----|----|-------|-------|-------|-------|-------|-------|-------|----------|
| cds.Camellia_sinensis.comp1508 | 5_c0_seq1_m.32666 | PREDICTED: non-functional NADPH-dependent codeinone reductase 2-like [Nicotiana tabacum]       | 35.677 | 11.693 | 14.4 | 6  | 11 | 4  | 0.924 | 0.889 | 0.857 | 1.116 | 1.156 | 1.103 | 1.264 | 8.22E-04 |
| cds.Camellia_sinensis.comp1510 | 5_c0_seq1_m.45326 | PREDICTED: galactokinase-like, partial [Ziziphus jujuba]                                       | 22.37  | 55.949 | 46.6 | 7  | 10 | 5  | 0.98  | 0.99  | 1.033 | 0.972 | 1.018 | 0.99  | 0.992 | 7.35E-01 |
| cds.Camellia_sinensis.comp1511 | 8_c0_seq1_m.21662 | PREDICTED: chromatin modification-related protein eaf-1-like isoform X2 [Pyrus bretschneideri] | 53.075 | 20.007 | 23.8 | 9  | 10 | 8  | 0.995 | 1.027 | 0.995 | 0.986 | 1.013 | 1.018 | 1     | 9.99E-01 |
| cds.Camellia_sinensis.comp1512 | 5_c0_seq1_m.36668 | PREDICTED: oxygen-evolving enhancer protein 2, chloroplastic-like [Nelumbo nucifera]           | 28.472 | 234.15 | 45.3 | 12 | 82 | 12 | 1.017 | 1.002 | 0.994 | 1.014 | 0.977 | 0.985 | 0.988 | 3.97E-01 |

|                                                 |                                                                                                            |        |        |      |   |   |   |       |       |       |       |       |       |       |          |
|-------------------------------------------------|------------------------------------------------------------------------------------------------------------|--------|--------|------|---|---|---|-------|-------|-------|-------|-------|-------|-------|----------|
| cds.Camellia_sinensis.comp15130_c0_seq1_m.33712 | PREDICTED: 2-C-methyl-D-erythritol 2,4-cyclodiphosphate synthase, chloroplastic [Ipomoea nil]              | 27.806 | 45.091 | 28.2 | 6 | 9 | 6 | 1.036 | 1.035 | 0.951 | 1.052 | 1.047 | 0.916 | 0.998 | 9.50E-01 |
| cds.Camellia_sinensis.comp15131_c0_seq1_m.44648 | PREDICTED: peptidyl-prolyl cis-trans isomerase FKBP17-1, chloroplastic-like isoform X1 [Nicotiana tabacum] | 24.294 | 1.4097 | 4.5  | 1 | 1 | 1 | 0.971 | 1.092 | 0.867 | 1.076 | 1.04  | 0.973 | 1.054 | 4.82E-01 |
| cds.Camellia_sinensis.comp15138_c0_seq1_m.58116 | PREDICTED: LOW QUALITY PROTEIN: hydroquinone glucosyltransferase [Ricinus communis]                        | 11.945 | 27.267 | 19.3 | 1 | 2 | 1 | 0.93  | 1.038 | 0.971 | 1.106 | 0.939 | 1.04  | 1.05  | 4.57E-01 |

|                                                    |                                                                                                                 |        |        |      |    |    |    |       |       |       |       |       |       |       |          |
|----------------------------------------------------|-----------------------------------------------------------------------------------------------------------------|--------|--------|------|----|----|----|-------|-------|-------|-------|-------|-------|-------|----------|
| PREDICTED:                                         |                                                                                                                 |        |        |      |    |    |    |       |       |       |       |       |       |       |          |
| cds.Camellia_sinensis.comp1515_6_c0_seq2_m.19699   | protease Do-like 8, chloroplast isoform X1 [Juglans regia]                                                      | 53.255 | 61.765 | 22.8 | 11 | 23 | 11 | 0.99  | 0.976 | 0.978 | 1.016 | 1.028 | 1.023 | 1.042 | 1.86E-03 |
| PREDICTED:                                         |                                                                                                                 |        |        |      |    |    |    |       |       |       |       |       |       |       |          |
| cds.Camellia_sinensis.comp1519_11_c0_seq1_m.5040_8 | EG45-like domain containing protein [Juglans regia]                                                             | 12.876 | 57.379 | 42.4 | 3  | 7  | 3  | 0.68  | 0.698 | 0.747 | 1.243 | 1.34  | 1.394 | 1.872 | 1.39E-04 |
| PREDICTED:                                         |                                                                                                                 |        |        |      |    |    |    |       |       |       |       |       |       |       |          |
| cds.Camellia_sinensis.comp1520_7_c0_seq1_m.26369   | lipoyl synthase 2, mitochondrial-like [Nicotiana attenuata]                                                     | 44.761 | 7.6395 | 9    | 3  | 3  | 3  | 1.01  | 0.919 | 1.001 | 1.041 | 1.067 | 0.98  | 1.054 | 2.50E-01 |
| PREDICTED:                                         |                                                                                                                 |        |        |      |    |    |    |       |       |       |       |       |       |       |          |
| cds.Camellia_sinensis.comp1524_6_c0_seq1_m.45602   | phosphatidylinositol 3,4,5-trisphosphate 3-phosphatase and protein-tyrosine-phosphatase PTEN2A [Vitis vinifera] | 14.7   | 1.9197 | 6.4  | 1  | 1  | 1  | 1.196 | 1.115 | 1.227 | 0.844 | 0.752 | 0.817 | 0.682 | 1.02E-03 |



|                                                 |                                                                                            |        |        |      |    |    |    |       |       |       |       |       |       |       |          |
|-------------------------------------------------|--------------------------------------------------------------------------------------------|--------|--------|------|----|----|----|-------|-------|-------|-------|-------|-------|-------|----------|
| cds.Camellia_sinensis.comp15326_c0_seq1_m.35297 | PREDICTED:<br>superoxide dismutase [Cu-Zn], chloroplastic [Daucus carota subsp. sativus]   | 21.644 | 166.42 | 50.2 | 6  | 21 | 4  | 0.954 | 0.932 | 0.928 | 1.056 | 1.101 | 1.065 | 1.145 | 9.18E-04 |
| cds.Camellia_sinensis.comp15329_c0_seq1_m.14629 | PREDICTED:<br>nucleobase-ascorbate transporter 3 [Solanum tuberosum]                       | 60.284 | 2.4328 | 1.8  | 1  | 1  | 1  | 0.894 | 1.048 | 0.969 | 1.134 | 1.032 | 0.957 | 1.073 | 3.56E-01 |
| cds.Camellia_sinensis.comp15334_c0_seq1_m.36519 | PREDICTED:<br>oxygen-evolving enhancer protein 3-2, chloroplastic [Pyrus x bretschneideri] | 24.704 | 144.61 | 42.5 | 12 | 86 | 12 | 1.003 | 1.003 | 0.989 | 1     | 1.003 | 0.993 | 1     | 9.53E-01 |
| cds.Camellia_sinensis.comp15342_c0_seq1_m.36209 | PREDICTED:<br>protein ABHD11 [Vitis vinifera]                                              | 20.277 | 1.8572 | 15.9 | 3  | 3  | 3  | 1.055 | 1.021 | 0.995 | 1.076 | 0.926 | 0.931 | 0.955 | 4.07E-01 |



|                                                  |                                                                                                                                                                                                    |        |        |      |    |    |    |       |       |       |       |       |       |       |          |
|--------------------------------------------------|----------------------------------------------------------------------------------------------------------------------------------------------------------------------------------------------------|--------|--------|------|----|----|----|-------|-------|-------|-------|-------|-------|-------|----------|
|                                                  | PREDICT<br>ED:                                                                                                                                                                                     |        |        |      |    |    |    |       |       |       |       |       |       |       |          |
| cds.Camellia_sinensis.comp1534_2_c0_seq1_m.36210 | alpha/beta<br>hydrolase<br>domain-<br>containing<br>protein 11<br>[Citrus<br>sinensis]<br>photosyste<br>m I<br>reaction<br>center<br>subunit IV<br>A<br>[Medicago<br>truncatula]<br>PREDICT<br>ED: | 14.115 | 9.2371 | 36.8 | 5  | 5  | 5  | 0.947 | 0.956 | 1.055 | 1.044 | 1.031 | 0.989 | 1.036 | 3.98E-01 |
| cds.Camellia_sinensis.comp1535_5_c0_seq1_m.41637 | cytochrom<br>e b-c1<br>complex<br>subunit<br>Rieske-4,<br>mitochond<br>rial-like<br>[Sesamum<br>indicum]<br>PREDICT<br>ED: GMP<br>synthase                                                         | 16.886 | 88.761 | 50   | 6  | 41 | 6  | 1.071 | 1.014 | 1.012 | 0.93  | 0.986 | 0.958 | 0.928 | 4.09E-02 |
| cds.Camellia_sinensis.comp1535_9_c0_seq1_m.28895 | glutamine<br>-<br>hydrolyzin<br>g]-like<br>[Daucus<br>carota<br>subsp.<br>sativus]                                                                                                                 | 29.243 | 104.76 | 20.9 | 5  | 12 | 5  | 0.991 | 1.019 | 1.017 | 0.99  | 1.02  | 1.003 | 0.995 | 7.29E-01 |
| cds.Camellia_sinensis.comp1536_4_c0_seq1_m.17207 |                                                                                                                                                                                                    | 63.741 | 65.823 | 20.5 | 10 | 13 | 10 | 0.945 | 0.966 | 0.925 | 1.052 | 1.057 | 1.085 | 1.126 | 1.66E-03 |

|                                                  |                                                                             |        |        |      |    |    |    |       |       |       |       |       |       |       |          |
|--------------------------------------------------|-----------------------------------------------------------------------------|--------|--------|------|----|----|----|-------|-------|-------|-------|-------|-------|-------|----------|
| cds.Camellia_sinensis.comp1536_5_c0_seq1_m.25957 | PREDICTED: psbP domain-containing protein 1, chloroplastic [Vitis vinifera] | 30.511 | 110.59 | 34.1 | 9  | 14 | 9  | 1.02  | 1.024 | 1.006 | 1.006 | 0.971 | 1.009 | 0.979 | 1.88E-01 |
| cds.Camellia_sinensis.comp1536_6_c0_seq1_m.9995  | PREDICTED: glutamate-tRNA ligase, cytoplasmic isoform X1 [Vitis vinifera]   | 83.157 | 82.443 | 23.2 | 18 | 23 | 18 | 0.968 | 1.009 | 0.975 | 1.011 | 1.005 | 0.998 | 1.021 | 1.91E-01 |
| cds.Camellia_sinensis.comp1537_7_c0_seq1_m.51446 | PREDICTED: WD repeat-containing protein 20-like [Nicotiana tomentosiformis] | 11.18  | 5.3034 | 19.4 | 1  | 1  | 1  | 0.949 | 0.974 | 0.77  | 1.233 | 0.894 | 1.217 | 1.242 | 1.76E-01 |
| cds.Camellia_sinensis.comp1538_3_c0_seq2_m.37999 | transmembrane protein, putative [Medicago truncatula]                       | 26.885 | 21.071 | 9.6  | 2  | 3  | 2  | 0.95  | 1.023 | 1.09  | 0.934 | 1.033 | 0.952 | 0.953 | 3.98E-01 |

|                                                 |                                                                                         |        |        |      |    |    |   |       |       |       |       |       |       |       |          |
|-------------------------------------------------|-----------------------------------------------------------------------------------------|--------|--------|------|----|----|---|-------|-------|-------|-------|-------|-------|-------|----------|
| cds.Camellia_sinensis.comp15418_c0_seq1_m.38718 | PREDICTED:<br>chlorophyll a-b binding protein, chloroplastic<br>[Sesamum indicum]       | 20.814 | 9.0459 | 5.8  | 1  | 3  | 1 | 0.771 | 1.127 | 1.133 | 1.001 | 0.941 | 1.057 | 0.989 | 9.79E-01 |
| cds.Camellia_sinensis.comp15473_c0_seq1_m.58569 | PREDICTED:<br>DEAD-box ATP-dependent RNA helicase 31-like isoform X2<br>[Juglans regia] | 11.445 | 1.6649 | 12.3 | 1  | 1  | 1 | 0.854 | 0.882 | 1.116 | 1.063 | 0.941 | 1.179 | 1.116 | 3.49E-01 |
| cds.Camellia_sinensis.comp15485_c0_seq1_m.44167 | DUF1230 family protein<br>[Medicago truncatula]                                         | 23.827 | 3.3517 | 5.5  | 1  | 1  | 1 | 0.965 | 0.988 | 0.96  | 1.064 | 0.983 | 1.059 | 1.066 | 7.91E-02 |
| cds.Camellia_sinensis.comp15493_c0_seq1_m.30430 | PREDICTED:<br>heat shock cognate 70 kDa protein 2-like<br>[Solanum pennellii]           | 48.561 | 213.42 | 56.1 | 23 | 92 | 6 | 1.051 | 1.025 | 1.028 | 0.959 | 0.953 | 0.976 | 0.93  | 2.48E-03 |

|                                                  |                                                                                 |        |        |      |   |    |   |       |       |       |       |       |       |       |          |
|--------------------------------------------------|---------------------------------------------------------------------------------|--------|--------|------|---|----|---|-------|-------|-------|-------|-------|-------|-------|----------|
|                                                  | PREDICTED:                                                                      |        |        |      |   |    |   |       |       |       |       |       |       |       |          |
| cds.Camellia_sinensis.comp1550_2_c0_seq1_m.12796 | phosphoglucan phosphatase LSF1, chloroplastic isoform X1 [Vitis vinifera]       | 55.465 | 4.08   | 3.2  | 2 | 2  | 2 | 0.97  | 0.964 | 0.972 | 1.113 | 1.087 | 0.92  | 1.074 | 3.77E-01 |
|                                                  | PREDICTED:                                                                      |        |        |      |   |    |   |       |       |       |       |       |       |       |          |
| cds.Camellia_sinensis.comp1550_2_c0_seq1_m.12797 | phosphoglucan phosphatase LSF1, chloroplastic [Ipomoea nil]                     | 11.887 | 1.2785 | 6.4  | 1 | 1  | 1 | 1.034 | 0.899 | 1.017 | 1.027 | 1.005 | 1.029 | 1.038 | 4.35E-01 |
|                                                  | PREDICTED: dnaJ protein homolog 2 isoform X2 [Solanum pennellii] DUF1995 domain |        |        |      |   |    |   |       |       |       |       |       |       |       |          |
| cds.Camellia_sinensis.comp1551_8_c0_seq1_m.22248 | protein homolog 2 isoform X2 [Solanum pennellii] DUF1995 domain                 | 46.487 | 54.094 | 16.9 | 7 | 12 | 2 | 1.26  | 1.201 | 1.286 | 0.744 | 0.787 | 0.751 | 0.609 | 4.47E-05 |
|                                                  | PREDICTED: putative (DUF1995)                                                   |        |        |      |   |    |   |       |       |       |       |       |       |       |          |
| cds.Camellia_sinensis.comp1552_7_c0_seq1_m.24033 | protein, putative (DUF1995) [Arabidopsis thaliana]                              | 41.608 | 54.694 | 19.2 | 5 | 7  | 5 | 1.028 | 1.038 | 1.059 | 0.989 | 0.903 | 0.967 | 0.915 | 3.55E-02 |

|                                                 |                                                                                                                           |        |        |      |    |    |    |       |       |       |       |       |       |       |          |
|-------------------------------------------------|---------------------------------------------------------------------------------------------------------------------------|--------|--------|------|----|----|----|-------|-------|-------|-------|-------|-------|-------|----------|
| cds.Camellia_sinensis.comp15528_c0_seq1_m.32944 | PREDICT<br>ED:<br>protein<br>GrpE<br>[Ricinus<br>communis]<br>PREDICT                                                     | 34.762 | 34.77  | 28.4 | 11 | 18 | 11 | 1.002 | 1.041 | 1.019 | 0.988 | 0.962 | 0.991 | 0.96  | 5.02E-02 |
| cds.Camellia_sinensis.comp15601_c0_seq1_m.41643 | PREDICT<br>ED:<br>protochlorophyllide<br>reductase,<br>chloroplast<br>ic [Ricinus<br>communis]<br>PREDICT                 | 30.961 | 2.1983 | 24.2 | 6  | 6  | 3  | 0.906 | 0.963 | 0.98  | 1.059 | 1.076 | 1.048 | 1.117 | 1.12E-02 |
| cds.Camellia_sinensis.comp15602_c0_seq1_m.26722 | PREDICT<br>ED: ABC<br>transporter<br>I family<br>member 6,<br>chloroplast<br>ic-like<br>[Nicotiana<br>tabacum]<br>PREDICT | 38.475 | 60.888 | 18.4 | 5  | 9  | 5  | 1.029 | 1.007 | 1.007 | 0.968 | 0.975 | 1.018 | 0.973 | 1.87E-01 |
| cds.Camellia_sinensis.comp15618_c0_seq1_m.27755 | PREDICT<br>ED:<br>BRCA1-A<br>complex<br>subunit<br>Abraxas<br>[Jatropha<br>curcas]                                        | 39.021 | 5.8587 | 12.5 | 4  | 4  | 4  | 0.998 | 1.053 | 0.986 | 1.021 | 0.945 | 1.007 | 0.979 | 5.30E-01 |



|                                                  |                                                                                    |        |        |      |    |    |   |       |       |       |       |       |       |       |          |
|--------------------------------------------------|------------------------------------------------------------------------------------|--------|--------|------|----|----|---|-------|-------|-------|-------|-------|-------|-------|----------|
| cds.Camellia_sinensis.comp1568_6_c0_seq1_m.2103  | PREDICT ED: adenosine kinase 2 [Vitis vinifera]                                    | 19.639 | 95.336 | 31.1 | 3  | 5  | 3 | 1.027 | 1.116 | 1.029 | 0.859 | 1.018 | 0.939 | 0.888 | 9.81E-02 |
| cds.Camellia_sinensis.comp1568_6_c0_seq1_m.2104  | PREDICT ED: adenosine kinase 1-like [Gossypium hirsutum]                           | 16.822 | 97.817 | 48   | 5  | 18 | 5 | 1.042 | 1.045 | 0.999 | 0.982 | 0.942 | 0.982 | 0.942 | 4.04E-02 |
| cds.Camellia_sinensis.comp1571_1_c0_seq1_m.22211 | PREDICT ED: fatty-acid-binding protein 1 [Vitis vinifera]                          | 11.424 | 3.8027 | 10.8 | 1  | 1  | 1 |       |       |       |       |       |       |       |          |
| cds.Camellia_sinensis.comp1571_6_c0_seq1_m.31680 | PREDICT ED: putative glucose-6-phosphate 1-epimerase isoform X1 [Ricinus communis] | 34.406 | 29.71  | 19.1 | 5  | 11 | 5 | 1.066 | 1.021 | 1.032 | 0.932 | 0.943 | 0.949 | 0.905 | 2.10E-03 |
| cds.Camellia_sinensis.comp1571_8_c0_seq1_m.36938 | PREDICT ED: peroxidase 73 [Vitis vinifera]                                         | 34.324 | 129.59 | 39.7 | 10 | 20 | 8 | 1.022 | 0.986 | 1.024 | 0.983 | 0.992 | 0.981 | 0.975 | 1.19E-01 |

|                                                 |                                                                                                                                                                                                                                                                                                                                                      |        |        |      |    |    |    |       |       |       |       |       |       |       |          |
|-------------------------------------------------|------------------------------------------------------------------------------------------------------------------------------------------------------------------------------------------------------------------------------------------------------------------------------------------------------------------------------------------------------|--------|--------|------|----|----|----|-------|-------|-------|-------|-------|-------|-------|----------|
| cds.Camellia_sinensis.comp15730_c0_seq1_m.27007 | <p>PREDICTED:<br/>dihydrolipoyllysine-residue acetyltransferase component 1 of pyruvate dehydrogenase complex, mitochondrial-like isoform X7 [Gossypium hirsutum]</p> <p>PREDICTED:<br/>clathrin heavy chain 1-like isoform X2 [Juglans regia]</p> <p>PREDICTED:<br/>glyceraldehyde-3-phosphate dehydrogenase B, chloroplastic [Malus domestica]</p> | 40.459 | 16.019 | 18.8 | 7  | 8  | 6  | 0.941 | 1     | 0.969 | 1.018 | 1.049 | 1.044 | 1.069 | 2.80E-02 |
| cds.Camellia_sinensis.comp15731_c0_seq1_m.30644 |                                                                                                                                                                                                                                                                                                                                                      | 50.439 | 4.2616 | 21.9 | 9  | 19 | 2  | 0.945 | 1.162 | 1.025 | 0.959 | 0.869 | 1.04  | 0.916 | 3.35E-01 |
| cds.Camellia_sinensis.comp15748_c0_seq1_m.44277 |                                                                                                                                                                                                                                                                                                                                                      | 19.306 | 253.51 | 85.1 | 13 | 60 | 10 | 1.003 | 0.994 | 1.003 | 0.999 | 1.008 | 0.983 | 0.997 | 6.92E-01 |



|                                |                                                                             |        |        |      |    |    |    |       |       |       |       |       |       |       |          |
|--------------------------------|-----------------------------------------------------------------------------|--------|--------|------|----|----|----|-------|-------|-------|-------|-------|-------|-------|----------|
| cds.Camellia_sinensis.comp1575 | PREDICTED: UBPA1-associated protein 2C isoform X2 [Theobroma cacao]         | 36.561 | 1.4143 | 2.7  | 1  | 1  | 1  |       |       |       |       |       |       |       |          |
| cds.Camellia_sinensis.comp1576 | PREDICTED: myosin-11 isoform X2 [Citrus sinensis]                           | 13.944 | 11.937 | 34.1 | 5  | 6  | 5  | 0.986 | 0.972 | 0.924 | 1.011 | 1.034 | 1.109 | 1.094 | 5.81E-02 |
| cds.Camellia_sinensis.comp1579 | PREDICTED: SKP1-like protein 1B [Citrus sinensis]                           | 11.715 | 1.3124 | 39   | 6  | 6  | 2  | 0.92  | 0.907 | 0.892 | 1.157 | 1.077 | 1.089 | 1.222 | 1.12E-03 |
| cds.Camellia_sinensis.comp1581 | PREDICTED: nodal modulator 1 [Vitis vinifera]                               | 131.25 | 110    | 15.3 | 15 | 21 | 15 | 0.991 | 0.983 | 1.013 | 1.002 | 0.976 | 0.992 | 0.994 | 6.55E-01 |
| cds.Camellia_sinensis.comp1585 | PREDICTED: U1 small nuclear ribonucleo protein A-like [Gossypium raimondii] | 36.069 | 40.859 | 28.3 | 8  | 9  | 8  | 0.93  | 0.943 | 0.999 | 1.062 | 1.13  | 1.036 | 1.124 | 2.62E-02 |

|                                |                   |                                                                                      |        |        |      |    |    |    |       |       |       |       |       |       |       |          |
|--------------------------------|-------------------|--------------------------------------------------------------------------------------|--------|--------|------|----|----|----|-------|-------|-------|-------|-------|-------|-------|----------|
| cds.Camellia_sinensis.comp1586 | 4_c0_seq1_m.58049 | PREDICT<br>ED: heat shock cognate 70 kDa protein 2 [Ricinus communis]                | 12.663 | 18.529 | 51.8 | 8  | 34 | 4  | 1.081 | 0.992 | 0.997 | 0.947 | 0.99  | 0.995 | 0.955 | 2.28E-01 |
| cds.Camellia_sinensis.comp1587 | 2_c0_seq1_m.39633 | PREDICT<br>ED: probable U6 snRNA-associated Sm-like protein LSm4 [Ipomoea nil]       | 16.096 | 1.7176 | 9.3  | 2  | 2  | 2  |       |       |       |       |       |       |       |          |
| cds.Camellia_sinensis.comp1588 | 8_c0_seq1_m.4259  | oxidoreductase/transit ion metal ion-binding protein, putative [Medicago truncatula] | 101.7  | 177.94 | 27.1 | 24 | 30 | 24 | 1.024 | 0.981 | 1.029 | 0.98  | 0.988 | 0.986 | 0.974 | 1.60E-01 |
| cds.Camellia_sinensis.comp1596 | 6_c0_seq1_m.15878 | PREDICT<br>ED: O-acyltransferase WSD1-like [Daucus carota subsp. sativus]            | 60.034 | 90.549 | 26.2 | 14 | 32 | 14 | 1.114 | 1.1   | 1.11  | 0.874 | 0.876 | 0.885 | 0.793 | 8.60E-07 |



|                                                 |                                                                                    |        |        |      |   |   |   |       |       |       |       |       |       |       |          |
|-------------------------------------------------|------------------------------------------------------------------------------------|--------|--------|------|---|---|---|-------|-------|-------|-------|-------|-------|-------|----------|
| cds.Camellia_sinensis.comp16063_c0_seq1_m.46848 | NtPRp27-like protein precursor [Solanum tuberosum PREDICTED:                       | 25.568 | 14.293 | 9.3  | 2 | 5 | 1 | 0.932 | 0.867 | 0.836 | 1.12  | 1.183 | 1.106 | 1.294 | 2.46E-03 |
| cds.Camellia_sinensis.comp16098_c0_seq1_m.39069 | rhodanese-like domain-containing protein 10 isoform X1 [Vitis vinifera] PREDICTED: | 24.434 | 14.456 | 24.1 | 4 | 5 | 4 | 1.086 | 1.064 | 1.066 | 0.885 | 0.934 | 0.927 | 0.854 | 9.39E-04 |
| cds.Camellia_sinensis.comp16103_c0_seq1_m.15293 | magnesium transporter MRS2-11, chloroplastic [Jatropha PREDICTED:                  | 40.64  | 22.585 | 22   | 7 | 8 | 7 | 1.025 | 1.023 | 1.075 | 0.979 | 0.954 | 0.938 | 0.919 | 1.47E-02 |
| cds.Camellia_sinensis.comp16110_c0_seq1_m.43593 | glycosyltransferase-like protein gnt13 [Nicotiana tomentosiformis]                 | 19.215 | 6.9989 | 10.7 | 2 | 7 | 2 | 0.991 | 0.948 | 0.917 | 1.002 | 1.093 | 1.015 | 1.089 | 7.32E-02 |

|                                |                                                                                            |        |        |      |   |   |   |       |       |       |       |       |       |       |          |
|--------------------------------|--------------------------------------------------------------------------------------------|--------|--------|------|---|---|---|-------|-------|-------|-------|-------|-------|-------|----------|
| cds.Camellia_sinensis.comp1611 | PREDICT<br>ED:<br>remorin<br>[Daucus carota subsp. sativus]                                | 30.655 | 1.4493 | 3.4  | 1 | 1 | 1 |       |       |       |       |       |       |       |          |
| cds.Camellia_sinensis.comp1612 | PREDICT<br>ED:<br>NAD(P)H-quinone oxidoreductase subunit L, chloroplastic [Vitis vinifera] | 23.33  | 3.1694 | 11   | 2 | 3 | 2 | 0.955 | 0.96  | 0.997 | 0.991 | 1.075 | 1.042 | 1.067 | 7.67E-02 |
| cds.Camellia_sinensis.comp1615 | PREDICT<br>ED:<br>glycine-rich protein 2-like [Juglans regia]                              | 19.893 | 132.3  | 26.6 | 4 | 9 | 4 | 1.083 | 1.06  | 1.034 | 0.937 | 0.904 | 0.946 | 0.877 | 2.44E-03 |
| cds.Camellia_sinensis.comp1616 | PREDICT<br>ED:<br>pleiotropic drug resistance protein 2-like [Fragaria vesca subsp. vesca] | 43.652 | 7.0768 | 4.4  | 1 | 1 | 1 | 0.813 | 1.007 | 0.971 | 1.097 | 1.084 | 1.074 | 1.166 | 1.40E-01 |

|                                                  |                                                                                         |        |        |      |   |   |   |       |       |       |       |       |       |       |          |
|--------------------------------------------------|-----------------------------------------------------------------------------------------|--------|--------|------|---|---|---|-------|-------|-------|-------|-------|-------|-------|----------|
| cds.Camellia_sinensis.comp1616_1_c0_seq2_m.41376 | PREDICTED:<br>pleiotropic drug resistance protein 2-like isoform X3 [Nelumbo nucifera]  | 33.68  | 4.0356 | 6.2  | 2 | 2 | 2 | 1.02  | 1.068 | 1.052 | 0.934 | 0.947 | 0.974 | 0.909 | 6.54E-03 |
| cds.Camellia_sinensis.comp1616_4_c0_seq1_m.43742 | PREDICTED:<br>NAD(P)H-quinone oxidoreductase subunit O, chloroplastic [Citrus sinensis] | 21.496 | 2.7668 | 8.4  | 2 | 3 | 2 | 1.049 | 1.104 | 1.05  | 0.998 | 0.918 | 0.873 | 0.871 | 3.04E-02 |
| cds.Camellia_sinensis.comp1619_1_c0_seq1_m.18823 | PREDICTED:<br>DNA binding protein [Arabidopsis thaliana]                                | 47.717 | 9.9999 | 8.8  | 3 | 3 | 3 | 1.035 | 1.065 | 0.961 | 0.869 | 0.985 | 1.075 | 0.957 | 5.33E-01 |
| cds.Camellia_sinensis.comp1620_7_c0_seq1_m.48693 | PREDICTED:<br>hypersensitive-induced response protein 2 [Erythranthe guttata]           | 23.34  | 3.8695 | 11.7 | 3 | 6 | 1 | 1.008 | 0.983 | 0.853 | 1.111 | 0.939 | 1.124 | 1.116 | 2.34E-01 |

|                                |                                                                             |        |        |      |   |    |   |       |       |       |       |       |       |       |          |
|--------------------------------|-----------------------------------------------------------------------------|--------|--------|------|---|----|---|-------|-------|-------|-------|-------|-------|-------|----------|
| cds.Camellia_sinensis.comp1622 | TPR repeat protein [Medicago truncatula]                                    | 26.525 | 1.3692 | 3.3  | 1 | 1  | 1 |       |       |       |       |       |       |       |          |
| cds.Camellia_sinensis.comp1625 | PREDICT ED: profilin-1 [Vitis vinifera]                                     | 14.145 | 13.6   | 29.8 | 3 | 3  | 2 | 0.936 | 1.015 | 1.124 | 1.111 | 0.903 | 0.93  | 0.957 | 6.19E-01 |
| cds.Camellia_sinensis.comp1626 | PREDICT ED: exosome complex component RRP4 homolog [Vitis vinifera]         | 37.256 | 7.6043 | 6.7  | 2 | 2  | 2 |       |       |       |       |       |       |       |          |
| cds.Camellia_sinensis.comp1628 | PREDICT ED: 40S ribosomal protein S4-3-like [Pyrus x bretschneideri]        | 18.551 | -2     | 26.7 | 5 | 11 | 1 | 1.184 | 1.142 | 1.179 | 0.822 | 0.83  | 0.796 | 0.698 | 2.49E-05 |
| cds.Camellia_sinensis.comp1634 | PREDICT ED: 40S ribosomal protein S17-4-like [Daucus carota subsp. sativus] | 17.554 | 18.444 | 37.1 | 5 | 8  | 5 | 1.143 | 1.189 | 1.055 | 0.855 | 0.898 | 0.806 | 0.756 | 4.00E-03 |

|                                |                                                                                                                                      |        |        |      |    |    |   |       |       |       |       |       |       |       |          |
|--------------------------------|--------------------------------------------------------------------------------------------------------------------------------------|--------|--------|------|----|----|---|-------|-------|-------|-------|-------|-------|-------|----------|
| cds.Camellia_sinensis.comp1637 | PREDICT<br>ED:<br>chalcone synthase [Pyrus x bretschneideri]<br>CAAX amino terminal protease family protein<br>[Medicago truncatula] | 19.938 | 47.804 | 46.6 | 6  | 27 | 1 | 1.467 | 1.452 | 1.298 | 0.561 | 0.511 | 0.575 | 0.391 | 6.01E-05 |
| cds.Camellia_sinensis.comp1638 | 9_c0_seq1_m.25964                                                                                                                    | 20.84  | 1.3771 | 5.5  | 1  | 1  | 1 | 1.014 | 1.01  | 1.052 | 0.962 | 0.891 | 1.069 | 0.95  | 3.77E-01 |
| cds.Camellia_sinensis.comp1639 | PREDICT<br>ED:<br>heterogeneous nuclear ribonucleo protein 1-like<br>[Sesamum indicum]                                               | 40.377 | 2.6678 | 2.9  | 1  | 1  | 1 |       |       |       |       |       |       |       |          |
| cds.Camellia_sinensis.comp1643 | PREDICT<br>ED:<br>importin subunit alpha-like<br>[Sesamum indicum]                                                                   | 31.172 | 13.912 | 37.9 | 10 | 11 | 4 | 0.998 | 1.063 | 0.993 | 0.834 | 1.094 | 1.015 | 0.964 | 6.35E-01 |



|                                |                    |                                                                                      |        |        |      |    |    |    |       |       |       |       |       |       |       |          |
|--------------------------------|--------------------|--------------------------------------------------------------------------------------|--------|--------|------|----|----|----|-------|-------|-------|-------|-------|-------|-------|----------|
| cds.Camellia_sinensis.comp1644 | 5_c0_seq1_m.37082  | PREDICTED:<br>hydroxyacylglutathione hydrolase cytoplasmic<br>[Nicotiana sylvestris] | 28.84  | 43.735 | 36.4 | 9  | 20 | 9  | 0.908 | 0.93  | 0.926 | 1.078 | 1.068 | 1.073 | 1.165 | 4.07E-05 |
| cds.Camellia_sinensis.comp1644 | 7_c0_seq1_m.16705  | PREDICTED:<br>ribosome-recycling factor, chloroplastic-like<br>[Gossypium hirsutum]  | 19.694 | 95.317 | 61.8 | 12 | 36 | 12 | 1.018 | 1.013 | 1     | 1     | 0.984 | 0.995 | 0.983 | 7.26E-02 |
| cds.Camellia_sinensis.comp1647 | 0_c0_seq2_m.43636  | transmembrane protein, putative (DUF3464)<br>[Arabidopsis thaliana]                  | 20.415 | 10.396 | 12.8 | 2  | 2  | 2  | 0.985 | 1.023 | 1.022 | 1.051 | 0.913 | 1.016 | 0.983 | 7.01E-01 |
| cds.Camellia_sinensis.comp1650 | 67_c0_seq1_m.53440 | PREDICTED:<br>bark storage protein A<br>[Vitis vinifera]                             | 16.928 | 5.69   | 16.4 | 2  | 2  | 2  | 0.924 | 0.985 | 1.037 | 1.201 | 0.908 | 0.979 | 1.048 | 6.72E-01 |

|                                |                                                                                               |        |        |      |    |    |    |       |       |       |       |       |       |       |          |
|--------------------------------|-----------------------------------------------------------------------------------------------|--------|--------|------|----|----|----|-------|-------|-------|-------|-------|-------|-------|----------|
| cds.Camellia_sinensis.comp1650 | PREDICTED:<br>inactive protein<br>RESTRICTED TEV<br>MOVEMENT 2-like<br>[Nicotiana sylvestris] | 46.902 | 28.374 | 20.1 | 7  | 7  | 7  | 1.058 | 1.102 | 1.119 | 0.938 | 0.899 | 0.903 | 0.836 | 1.12E-03 |
| cds.Camellia_sinensis.comp1651 | PREDICTED: plant UBX domain-containing protein 10<br>[Ipomoea nil]                            | 50.334 | 7.0513 | 6.7  | 3  | 4  | 3  | 0.952 | 1     | 0.995 | 0.996 | 1.027 | 1.026 | 1.035 | 1.40E-01 |
| cds.Camellia_sinensis.comp1653 | PREDICTED:<br>dynamain-related protein 5A<br>[Sesamum indicum]                                | 68.501 | 59.536 | 28.6 | 15 | 20 | 14 | 0.973 | 0.95  | 1.012 | 1.053 | 1.027 | 1.014 | 1.054 | 6.95E-02 |
| cds.Camellia_sinensis.comp1657 | PREDICTED:<br>glutathione S-transferase-like<br>[Nelumbo nucifera]                            | 15.216 | 42.262 | 42.1 | 5  | 15 | 5  | 1.019 | 0.983 | 0.985 | 1.014 | 0.995 | 1.046 | 1.023 | 2.96E-01 |
| cds.Camellia_sinensis.comp1657 | PREDICTED:<br>UBP1-associated protein 2A<br>[Vitis vinifera]                                  | 54.081 | 9.8999 | 7.7  | 4  | 5  | 4  | 1.129 | 1.066 | 1.142 | 0.974 | 0.856 | 0.825 | 0.796 | 1.35E-02 |

|                                                  |                                                                                           |        |        |      |   |    |   |       |       |       |       |       |       |       |          |
|--------------------------------------------------|-------------------------------------------------------------------------------------------|--------|--------|------|---|----|---|-------|-------|-------|-------|-------|-------|-------|----------|
| cds.Camellia_sinensis.comp1658_2_c0_seq1_m.22277 | PREDICTED:<br>rhodanese-like domain-containing protein 4A, chloroplastic [Vitis vinifera] | 42.729 | 1.6561 | 4.7  | 2 | 2  | 2 | 0.916 | 1.068 | 1.103 | 0.926 | 1.023 | 0.975 | 0.947 | 4.64E-01 |
| cds.Camellia_sinensis.comp1658_8_c0_seq1_m.38680 | PREDICTED:<br>photosystem II reaction center PSB28 protein, chloroplastic [Prunus mume]   | 21.185 | 7.5307 | 18.3 | 3 | 4  | 3 | 0.971 | 1.023 | 0.988 | 0.989 | 0.979 | 0.985 | 0.99  | 5.74E-01 |
| cds.Camellia_sinensis.comp1659_1_c0_seq1_m.34054 | PREDICTED:<br>elongation factor 1-beta-like [Sesamum indicum]                             | 24.443 | 58.605 | 40   | 8 | 24 | 7 | 0.994 | 0.98  | 0.976 | 1.013 | 1.034 | 1.018 | 1.039 | 9.98E-03 |
| cds.Camellia_sinensis.comp1659_2_c0_seq1_m.51984 | PREDICTED:<br>ADP-ribosylation factor 8B-like protein [Musa acuminata subsp. malaccensis] | 13.145 | 19.264 | 53.8 | 5 | 8  | 4 | 0.972 | 1.008 | 0.945 | 1.088 | 1.015 | 1.008 | 1.064 | 1.16E-01 |

|                                |                   |                                                                         |        |        |      |   |   |   |       |       |       |       |       |      |     |          |
|--------------------------------|-------------------|-------------------------------------------------------------------------|--------|--------|------|---|---|---|-------|-------|-------|-------|-------|------|-----|----------|
| cds.Camellia_sinensis.comp1659 | 5_c0_seq1_m.26718 | PREDICTED: DNA-directed RNA polymerase V subunit 1 [Vitis]              | 45.641 | 8.681  | 6.7  | 2 | 2 | 2 |       |       |       |       |       |      |     |          |
| cds.Camellia_sinensis.comp1660 | 7_c0_seq1_m.12090 | PREDICTED: mitotic spindle checkpoint protein MAD1 [Vitis vinifera]     | 51.684 | 1.7796 | 2.7  | 1 | 1 | 1 |       |       |       |       |       |      |     |          |
| cds.Camellia_sinensis.comp1660 | 8_c0_seq1_m.28401 | PREDICTED: pleiotropic drug resistance protein 2-like [Sesamum indicum] | 50.888 | 1.8817 | 5.7  | 3 | 3 | 0 |       |       |       |       |       |      |     |          |
| cds.Camellia_sinensis.comp1660 | 8_c0_seq2_m.32924 | PREDICTED: pleiotropic drug resistance protein 2-like [Sesamum indicum] | 43.489 | 16.949 | 13.3 | 5 | 5 | 3 | 0.892 | 0.958 | 0.897 | 1.128 | 1.098 | 1.07 | 1.2 | 2.68E-03 |

|                                |                                                                             |        |        |      |    |    |    |       |       |       |       |       |       |       |          |
|--------------------------------|-----------------------------------------------------------------------------|--------|--------|------|----|----|----|-------|-------|-------|-------|-------|-------|-------|----------|
| cds.Camellia_sinensis.comp1661 | PREDICTED:<br>aminomethyltransferase,<br>mitochondrial<br>[Nelumbonucifera] | 37.162 | 131.88 | 46.4 | 15 | 56 | 15 | 1.045 | 1     | 1.016 | 0.979 | 0.993 | 0.984 | 0.966 | 6.20E-02 |
| cds.Camellia_sinensis.comp1662 | PREDICTED:<br>peroxiredoxin-2B<br>[Populuseuphratica]                       | 17.412 | 44.896 | 30.9 | 4  | 13 | 4  | 1.057 | 1.016 | 1.059 | 0.944 | 0.987 | 0.952 | 0.92  | 1.25E-02 |
| cds.Camellia_sinensis.comp1666 | PREDICTED: beta-glucosidase<br>BoGH3B-like<br>[Prunusmume]                  | 13.029 | 15.962 | 37.8 | 4  | 5  | 4  | 1.012 | 1.03  | 1.052 | 0.981 | 0.97  | 0.995 | 0.952 | 2.18E-02 |
| cds.Camellia_sinensis.comp1666 | PREDICTED: kirolalike<br>[Sesamumindicum]                                   | 20.034 | 135.19 | 51.4 | 9  | 31 | 9  | 0.969 | 0.963 | 0.975 | 1.042 | 1.017 | 1.037 | 1.065 | 1.58E-03 |
| cds.Camellia_sinensis.comp1667 | PREDICTED:<br>chaperonin CPN60-2,<br>mitochondrial<br>[Theobroma cacao]     | 43.716 | 168.18 | 54.2 | 22 | 49 | 15 | 0.98  | 0.954 | 0.962 | 1.049 | 1.045 | 1.041 | 1.083 | 6.56E-04 |

|                                                  |                                                                                                     |        |        |      |    |    |    |       |       |       |       |       |       |       |          |
|--------------------------------------------------|-----------------------------------------------------------------------------------------------------|--------|--------|------|----|----|----|-------|-------|-------|-------|-------|-------|-------|----------|
| cds.Camellia_sinensis.comp1668_0_c0_seq1_m.14842 | PREDICTED:<br>pentatricopeptide repeat-containing protein At3g02490, mitochondrial [Vitis vinifera] | 73.699 | 4.7248 | 3.2  | 2  | 2  | 2  | 1.013 | 1.014 | 1.058 | 1.055 | 0.907 | 0.961 | 0.947 | 2.95E-01 |
| cds.Camellia_sinensis.comp1668_8_c0_seq1_m.25660 | PREDICTED:<br>pyridoxal kinase [Nicotiana attenuata]                                                | 37.385 | 20.742 | 19.8 | 7  | 10 | 7  | 1.04  | 0.934 | 0.976 | 1.014 | 1.032 | 1.022 | 1.04  | 2.73E-01 |
| cds.Camellia_sinensis.comp1672_2_c0_seq1_m.19086 | PREDICTED:<br>BRO1 domain-containing protein BROX [Citrus sinensis]                                 | 47.506 | 9.2122 | 13.1 | 4  | 5  | 4  | 1.047 | 0.989 | 0.964 | 0.985 | 1.046 | 0.973 | 1.001 | 9.68E-01 |
| cds.Camellia_sinensis.comp1673_0_c0_seq1_m.27278 | PREDICTED:<br>annexin D1 [Populus]                                                                  | 35.899 | 127.46 | 47.2 | 16 | 37 | 16 | 0.96  | 0.961 | 0.937 | 1.053 | 1.068 | 1.061 | 1.113 | 3.05E-04 |
| cds.Camellia_sinensis.comp1674_1_c0_seq1_m.53860 | PREDICTED:<br>CBS domain-containing protein CBSX3, mitochondrial [Citrus sinensis]                  | 11.542 | 11.159 | 15.1 | 1  | 2  | 1  | 0.886 | 0.875 | 0.923 | 1.111 | 1.12  | 1.129 | 1.252 | 1.80E-04 |

|                                                  |                                                                                                           |        |        |      |    |    |    |       |       |       |       |       |       |       |          |
|--------------------------------------------------|-----------------------------------------------------------------------------------------------------------|--------|--------|------|----|----|----|-------|-------|-------|-------|-------|-------|-------|----------|
| cds.Camellia_sinensis.comp1676_5_c0_seq1_m.35556 | PREDICTED:<br>probable bifunctional TENE protein [Solanum tuberosum]                                      | 26.374 | 1.4183 | 6.5  | 2  | 2  | 2  | 0.986 | 0.959 | 0.987 | 0.991 | 1.057 | 1.035 | 1.052 | 7.80E-02 |
| cds.Camellia_sinensis.comp1676_6_c0_seq1_m.28858 | PREDICTED:<br>FAD-dependent urate hydroxylase isoform X1 [Solanum pennellii]                              | 47.061 | 93.521 | 28.8 | 10 | 18 | 10 | 0.912 | 0.919 | 0.938 | 1.101 | 1.103 | 1.073 | 1.183 | 1.61E-04 |
| cds.Camellia_sinensis.comp1676_9_c0_seq1_m.31560 | PREDICTED:<br>mediator of RNA polymerase II transcription subunit 36a-like [Daucus carota subsp. sativus] | 33.21  | 52.822 | 26.7 | 8  | 16 | 8  | 1.033 | 1.058 | 1.037 | 0.971 | 0.95  | 0.975 | 0.926 | 2.14E-03 |
| cds.Camellia_sinensis.comp1677_0_c0_seq1_m.38569 | PREDICTED:<br>protein SPIRAL1-like 1 [Populus euphratica]                                                 | 11.306 | 72.789 | 46.1 | 3  | 7  | 3  | 1.12  | 1.016 | 1.052 | 0.922 | 0.948 | 0.917 | 0.874 | 1.16E-02 |







|                                |                   |                                                                                                |        |        |      |    |    |   |       |       |       |       |       |       |       |          |
|--------------------------------|-------------------|------------------------------------------------------------------------------------------------|--------|--------|------|----|----|---|-------|-------|-------|-------|-------|-------|-------|----------|
| cds.Camellia_sinensis.comp1696 | 5_c1_seq1_m.43577 | PREDICTED:<br>photosynthetic NDH subunit of luminal location 2, chloroplastic [Vitis vinifera] | 18.219 | 41.309 | 39.5 | 5  | 6  | 5 | 0.999 | 1.003 | 1.045 | 0.985 | 1.012 | 0.951 | 0.968 | 2.24E-01 |
| cds.Camellia_sinensis.comp1697 | 6_c0_seq1_m.36981 | PREDICTED:<br>heat shock cognate 70 kDa protein 2-like [Phoenix dactylifera]                   | 39.107 | 81.65  | 47.6 | 19 | 57 | 6 | 1.05  | 1.008 | 0.982 | 0.971 | 0.967 | 1.007 | 0.969 | 2.48E-01 |
| cds.Camellia_sinensis.comp1698 | 1_c0_seq1_m.10785 | PREDICTED:<br>ABC transporter F family member 5 [Vitis vinifera]                               | 57.2   | 6.22   | 2    | 1  | 1  | 1 | 1.046 | 1.057 | 1.083 | 1.037 | 0.867 | 0.905 | 0.882 | 7.91E-02 |
| cds.Camellia_sinensis.comp1698 | 1_c0_seq1_m.10786 | PREDICTED:<br>ABC transporter F family member 5 [Ziziphus jujuba]                              | 26.967 | 5.4578 | 14.9 | 3  | 4  | 3 | 1.024 | 1.017 | 0.976 | 1.081 | 0.908 | 1.001 | 0.991 | 8.41E-01 |



|                                |                   |                                                                               |        |        |     |   |   |   |       |       |       |       |       |       |       |          |
|--------------------------------|-------------------|-------------------------------------------------------------------------------|--------|--------|-----|---|---|---|-------|-------|-------|-------|-------|-------|-------|----------|
| cds.Camellia_sinensis.comp1714 | 7_c0_seq1_m.50824 | PREDICT ED: BRISC and BRCA1-A complex member 1 [Cucumis]                      | 14.116 | 1.6234 | 6.2 | 1 | 1 | 1 | 0.981 | 1.022 | 1.042 | 0.998 | 1.016 | 0.952 | 0.974 | 3.74E-01 |
| cds.Camellia_sinensis.comp1716 | 9_c0_seq1_m.46387 | PREDICT ED: mannan endo-1,4-beta-mannosidase 7-like [Nelumbo nucifera]        | 22.309 | 2.4031 | 9.7 | 1 | 1 | 1 |       |       |       |       |       |       |       |          |
| cds.Camellia_sinensis.comp1717 | 5_c0_seq1_m.36851 | PREDICT ED: protein LOW PSII ACCUMULATION 1, chloroplastic [Nelumbo nucifera] | 38.066 | 17.386 | 9.3 | 3 | 5 | 3 | 1.008 | 0.984 | 0.979 | 1.05  | 0.984 | 1.028 | 1.031 | 2.30E-01 |
| cds.Camellia_sinensis.comp1723 | 7_c0_seq1_m.50048 | PREDICT ED: protein SIEVE ELEMENT OCCLUSION B-like [Juglans regia]            | 21.273 | 25.063 | 22  | 3 | 5 | 3 | 0.931 | 0.917 | 0.969 | 1.213 | 1.02  | 1.134 | 1.195 | 2.94E-02 |

|                                |                                                                                            |        |        |      |   |    |   |       |       |       |       |       |       |       |          |
|--------------------------------|--------------------------------------------------------------------------------------------|--------|--------|------|---|----|---|-------|-------|-------|-------|-------|-------|-------|----------|
| cds.Camellia_sinensis.comp1724 | PREDICT<br>ED: PI-PLC X-box domain-containing protein<br>DDB_G0293730<br>[Ziziphus jujuba] | 36.317 | 4.9145 | 8.5  | 3 | 5  | 3 | 1.012 | 1.033 | 1.001 | 0.972 | 1     | 0.991 | 0.973 | 9.10E-02 |
| cds.Camellia_sinensis.comp1728 | PREDICT<br>ED: aspartic proteinase-like protein 2<br>[Nelumbo nucifera]                    | 54.216 | 1.438  | 1.4  | 1 | 1  | 1 | 1.002 | 1.056 | 1.125 | 0.952 | 0.923 | 0.938 | 0.884 | 2.41E-02 |
| cds.Camellia_sinensis.comp1728 | PREDICT<br>ED: proteasome subunit alpha type-5<br>[Juglans regia]                          | 25.983 | 122.46 | 40.5 | 9 | 28 | 9 | 0.999 | 0.98  | 0.959 | 1.034 | 1.031 | 1.045 | 1.059 | 1.03E-02 |
| cds.Camellia_sinensis.comp1731 | PREDICT<br>ED: coatomer subunit beta-1<br>[Cucumis sativus]                                | 33.782 | 3.8181 | 3.4  | 1 | 2  | 1 | 1.024 | 1.035 | 1.042 | 0.938 | 0.945 | 1.013 | 0.934 | 5.10E-02 |
| cds.Camellia_sinensis.comp1731 | PREDICT<br>ED: peroxidase A2-like<br>[Juglans regia]                                       | 17.197 | 63.203 | 28.5 | 4 | 9  | 4 | 0.969 | 0.886 | 0.886 | 1.105 | 1.134 | 1.071 | 1.208 | 5.16E-03 |

|                                                 |                                                                                   |        |        |      |    |    |    |       |       |       |       |       |       |       |          |
|-------------------------------------------------|-----------------------------------------------------------------------------------|--------|--------|------|----|----|----|-------|-------|-------|-------|-------|-------|-------|----------|
| cds.Camellia_sinensis.comp17320_c0_seq3_m.36333 | PREDICTED: DNA repair RAD52-like protein 2, chloroplastic [Ipomoea nil]           | 28.007 | 42.357 | 25.7 | 6  | 14 | 6  | 0.95  | 0.982 | 1.024 | 1.009 | 1.036 | 1.016 | 1.036 | 2.01E-01 |
| cds.Camellia_sinensis.comp17327_c0_seq1_m.47678 | PREDICTED: triphosphate tunnel metalloenzyme 3-like [Capsicum annuum]             | 14.817 | 1.5128 | 6    | 1  | 1  | 1  | 0.953 | 1.053 | 0.964 | 1.034 | 1.019 | 0.995 | 1.026 | 4.68E-01 |
| cds.Camellia_sinensis.comp17330_c0_seq1_m.25747 | PREDICTED: transmembrane protein 184 homolog DDB_G0279555 [Ricinus communis]      | 34.047 | 1.7759 | 2.7  | 1  | 2  | 1  | 0.917 | 1.029 | 1.017 | 0.993 | 1.033 | 1.03  | 1.031 | 4.55E-01 |
| cds.Camellia_sinensis.comp17389_c0_seq1_m.5176  | PREDICTED: 26S proteasome non-ATPase regulatory subunit 2 homolog A [Prunus mume] | 97.952 | 237.79 | 32.4 | 24 | 37 | 24 | 1.001 | 1.014 | 1.024 | 1.003 | 0.983 | 1     | 0.983 | 1.25E-01 |

|                                                  |                                                                      |        |        |      |    |    |    |       |       |       |       |       |       |       |          |
|--------------------------------------------------|----------------------------------------------------------------------|--------|--------|------|----|----|----|-------|-------|-------|-------|-------|-------|-------|----------|
| cds.Camellia_sinensis.comp1739_3_c0_seq1_m.55351 | PREDICTED:<br>galactokinase isoform X2<br>[Gossypium raimondii]      | 14.78  | 1.4127 | 17.2 | 3  | 3  | 2  | 0.97  | 0.981 | 0.96  | 0.964 | 1.027 | 1.111 | 1.066 | 2.75E-01 |
| cds.Camellia_sinensis.comp1739_4_c1_seq1_m.57350 | PREDICTED:<br>thioredoxin H-type<br>[Prunus mume]                    | 13.475 | 10.011 | 15.7 | 2  | 9  | 1  | 0.938 | 0.951 | 0.969 | 1.058 | 1.134 | 1.035 | 1.129 | 1.43E-02 |
| cds.Camellia_sinensis.comp1741_3_c0_seq1_m.32892 | PREDICTED:<br>bark storage protein A<br>[Vitis vinifera]             | 40.465 | 11.414 | 3.8  | 1  | 1  | 1  | 1.034 | 0.89  | 0.911 | 0.908 | 1.083 | 1.182 | 1.119 | 2.95E-01 |
| cds.Camellia_sinensis.comp1741_4_c0_seq1_m.7290  | PREDICTED:<br>subtilisin-like protease SBT1.4<br>[Nicotiana tabacum] | 96.47  | 70.889 | 14.4 | 11 | 25 | 11 | 1.036 | 1.068 | 1.037 | 0.965 | 0.956 | 0.943 | 0.912 | 1.54E-03 |
| cds.Camellia_sinensis.comp1744_6_c0_seq1_m.36742 | PREDICTED:<br>probable methyltransferase PMT2<br>[Sesamum indicum]   | 28.568 | 2.1685 | 3.1  | 1  | 1  | 1  | 1.239 | 1.309 | 1.203 | 0.721 | 0.729 | 0.723 | 0.579 | 2.08E-03 |

|                                                  |                                                                                             |        |        |      |    |    |    |       |       |       |       |       |       |       |          |
|--------------------------------------------------|---------------------------------------------------------------------------------------------|--------|--------|------|----|----|----|-------|-------|-------|-------|-------|-------|-------|----------|
| cds.Camellia_sinensis.comp1745_4_c0_seq1_m.52470 | PREDICTED: mitochondrial import inner membrane translocase subunit Tim9 [Erythraea guttata] | 12.886 | 38.635 | 60.7 | 6  | 15 | 6  | 0.983 | 1.022 | 1.036 | 1.007 | 1.018 | 0.986 | 0.99  | 6.23E-01 |
| cds.Camellia_sinensis.comp1745_7_c0_seq1_m.39054 | PREDICTED: protein YLS3 [Vitis vinifera]                                                    | 20.165 | 1.9    | 7.4  | 1  | 1  | 1  |       |       |       |       |       |       |       |          |
| cds.Camellia_sinensis.comp1749_1_c0_seq1_m.52292 | PREDICTED: 28 kDa ribonucleoprotein, chloroplastic [Ziziphus jujuba]                        | 17.716 | 11.9   | 8.4  | 1  | 4  | 1  | 0.984 | 1.041 | 0.98  | 0.958 | 1.034 | 1.01  | 0.999 | 9.72E-01 |
| cds.Camellia_sinensis.comp1753_8_c0_seq2_m.4420  | PREDICTED: glycine--tRNA ligase, chloroplastic/mitochondrial 2 isoform X1 [Vitis vinifera]  | 122.03 | 62.461 | 13.4 | 13 | 15 | 13 | 0.957 | 0.986 | 1.009 | 1.002 | 1.023 | 1.045 | 1.04  | 1.15E-01 |







|                                |                                                                                                                                                                                     |        |        |      |    |    |   |       |       |       |       |       |       |       |          |
|--------------------------------|-------------------------------------------------------------------------------------------------------------------------------------------------------------------------------------|--------|--------|------|----|----|---|-------|-------|-------|-------|-------|-------|-------|----------|
| cds.Camellia_sinensis.comp1772 | PREDICT<br>ED:<br>protein<br>argonaute<br>4A-like<br>[Juglans regia]                                                                                                                | 21.705 | 8.487  | 14.4 | 2  | 3  | 2 | 1.144 | 1.123 | 1.093 | 0.955 | 0.756 | 0.898 | 0.776 | 2.24E-02 |
| cds.Camellia_sinensis.comp1775 | PREDICT<br>ED: 14-3-<br>3-like<br>protein<br>[Juglans regia]                                                                                                                        | 21.218 | 72.505 | 68.3 | 10 | 28 | 8 | 1.034 | 1.005 | 0.889 | 1.04  | 1.017 | 1.043 | 1.059 | 2.77E-01 |
| cds.Camellia_sinensis.comp1776 | PREDICT<br>ED:<br>uncharacterized<br>methyltransferase<br>At1g78140,<br>chloroplastic isoform<br>X1<br>[Juglans regia]<br>DNA-binding<br>family<br>protein<br>[Populus trichocarpa] | 35.471 | 6.772  | 10.7 | 3  | 4  | 3 | 0.906 | 1.039 | 0.869 | 1.023 | 1.129 | 1.064 | 1.143 | 9.06E-02 |
| cds.Camellia_sinensis.comp1783 | binding<br>family<br>protein<br>[Populus trichocarpa]                                                                                                                               | 17.9   | 68.535 | 27   | 4  | 6  | 3 | 0.969 | 1.002 | 0.959 | 1.042 | 1.004 | 1.046 | 1.055 | 4.44E-02 |

|                                                  |                                                                                                                  |        |        |     |   |    |   |       |       |       |       |       |       |       |          |
|--------------------------------------------------|------------------------------------------------------------------------------------------------------------------|--------|--------|-----|---|----|---|-------|-------|-------|-------|-------|-------|-------|----------|
| cds.Camellia_sinensis.comp1786_2_c0_seq1_m.51544 | PREDICTED:<br>plasma membrane-associated cation-binding protein 1-like isoform X1<br>[Nicotiana tomentosiformis] | 14.382 | 74.525 | 39  | 6 | 17 | 6 | 0.972 | 0.913 | 0.941 | 1.051 | 1.07  | 1.057 | 1.125 | 3.34E-03 |
| cds.Camellia_sinensis.comp1786_5_c0_seq1_m.38533 | PREDICTED:<br>caffeoyl-CoA O-methyltransferase isoform X1<br>[Ricinus communis]                                  | 26.74  | 3.3912 | 7.2 | 2 | 3  | 2 | 0.981 | 0.943 | 0.942 | 1.031 | 1.095 | 1.024 | 1.099 | 2.00E-02 |
| cds.Camellia_sinensis.comp1787_0_c0_seq1_m.40532 | PREDICTED:<br>psbP domain-containing protein 2, chloroplastic [Prunus mume]                                      | 27.21  | 49.923 | 20  | 4 | 10 | 4 | 0.971 | 0.976 | 0.949 | 1.03  | 1.045 | 1.059 | 1.082 | 2.58E-03 |

|                                                  |                                                                             |        |        |      |    |    |    |       |       |       |       |       |       |       |          |
|--------------------------------------------------|-----------------------------------------------------------------------------|--------|--------|------|----|----|----|-------|-------|-------|-------|-------|-------|-------|----------|
|                                                  | PREDICT                                                                     |        |        |      |    |    |    |       |       |       |       |       |       |       |          |
|                                                  | ED:                                                                         |        |        |      |    |    |    |       |       |       |       |       |       |       |          |
| cds.Camellia_sinensis.comp1787_2_c0_seq1_m.38423 | peptidyl-prolyl cis-trans isomerase CYP18-2 [Vigna radiata var. radiata]    | 18.195 | 15.309 | 29.3 | 4  | 4  | 4  | 1.004 | 1.011 | 0.985 | 0.982 | 1.026 | 1.001 | 1.003 | 8.55E-01 |
|                                                  | PREDICT                                                                     |        |        |      |    |    |    |       |       |       |       |       |       |       |          |
|                                                  | ED:                                                                         |        |        |      |    |    |    |       |       |       |       |       |       |       |          |
| cds.Camellia_sinensis.comp1790_4_c0_seq1_m.26470 | aconitate hydratase, cytoplasmic [Sesamum indicum]                          | 37.957 | 95.837 | 45.2 | 16 | 40 | 8  | 0.968 | 0.993 | 0.919 | 1.044 | 1.052 | 1.048 | 1.092 | 6.12E-02 |
|                                                  | PREDICT                                                                     |        |        |      |    |    |    |       |       |       |       |       |       |       |          |
|                                                  | ED:                                                                         |        |        |      |    |    |    |       |       |       |       |       |       |       |          |
| cds.Camellia_sinensis.comp1791_3_c0_seq1_m.31582 | probable choline kinase 1 [Sesamum indicum]                                 | 25.128 | 3.1171 | 3.7  | 1  | 2  | 1  | 0.903 | 0.961 | 0.976 | 1.017 | 1.106 | 1.067 | 1.123 | 2.68E-02 |
|                                                  | PREDICT                                                                     |        |        |      |    |    |    |       |       |       |       |       |       |       |          |
|                                                  | ED:                                                                         |        |        |      |    |    |    |       |       |       |       |       |       |       |          |
| cds.Camellia_sinensis.comp1796_4_c0_seq1_m.38271 | probable plastid-lipid-associated protein 13, chloroplastic [Juglans regia] | 36.09  | 110.56 | 41   | 11 | 28 | 11 | 0.985 | 0.955 | 0.963 | 1.03  | 1.042 | 1.05  | 1.075 | 2.52E-03 |



|                                                    |                                                                                 |        |        |      |   |    |   |       |       |       |       |       |       |       |          |
|----------------------------------------------------|---------------------------------------------------------------------------------|--------|--------|------|---|----|---|-------|-------|-------|-------|-------|-------|-------|----------|
| cds.Camellia_sinensis.comp1808_9_c0_seq1_m.28576   | PREDICT ED: methylthio ribose-1-phosphate isomerase [Populus euphratica]        | 41.504 | 41.181 | 22   | 8 | 13 | 8 | 0.946 | 0.958 | 0.931 | 1.082 | 1.039 | 1.009 | 1.104 | 1.07E-02 |
| cds.Camellia_sinensis.comp1810_19_c0_seq1_m.5325_7 | PREDICT ED: UDP-glycosyltransferase 73C2 [Vitis vinifera]                       | 17.497 | 1.9577 | 7.7  | 1 | 1  | 1 |       |       |       |       |       |       |       |          |
| cds.Camellia_sinensis.comp1815_2_c0_seq1_m.49380   | PREDICT ED: hypersensitive-induced response protein 2 [Theobroma cacao]         | 18.171 | 3.8593 | 30.7 | 5 | 5  | 4 | 0.911 | 0.953 | 0.938 | 1.068 | 1.063 | 1.095 | 1.151 | 9.38E-04 |
| cds.Camellia_sinensis.comp1815_7_c0_seq1_m.44976   | PREDICT ED: cytochrome c [Arachis ipaensis]                                     | 12.331 | 11.21  | 38.4 | 4 | 8  | 4 | 1.04  | 0.98  | 0.984 | 1.026 | 1.001 | 0.976 | 1     | 9.95E-01 |
| cds.Camellia_sinensis.comp1818_8_c0_seq1_m.33943   | PREDICT ED: probable ribosome-binding factor A, chloroplastic [Theobroma cacao] | 25.487 | 3.8121 | 10.2 | 2 | 3  | 2 | 1.153 | 1.153 | 1.158 | 0.927 | 0.792 | 0.874 | 0.749 | 2.39E-02 |

|                                                  |                                                                                                            |        |        |      |    |    |    |       |       |       |       |       |       |       |          |
|--------------------------------------------------|------------------------------------------------------------------------------------------------------------|--------|--------|------|----|----|----|-------|-------|-------|-------|-------|-------|-------|----------|
| cds.Camellia_sinensis.comp182174_c0_seq1_m.46675 | PREDICTED: D-3-phosphoglycerate dehydrogenase 3, chloroplastic [Vitis vinifera]                            | 20.892 | 4.3712 | 10.1 | 2  | 4  | 1  | 0.95  | 0.939 | 0.984 | 1.031 | 0.993 | 1.125 | 1.096 | 8.39E-02 |
| cds.Camellia_sinensis.comp18218_c0_seq1_m.53618  | PREDICTED: ATP-dependent zinc metalloprotease FTSH 11, chloroplastic/mitochondrial-like [Nelumbo nucifera] | 16.927 | 8.9212 | 19.2 | 2  | 2  | 2  |       |       |       |       |       |       |       |          |
| cds.Camellia_sinensis.comp18252_c0_seq1_m.24814  | PREDICTED: proteinase-like [Nicotiana tabacum]                                                             | 48.881 | 71.7   | 29.9 | 12 | 24 | 12 | 0.965 | 0.939 | 0.96  | 1.059 | 1.059 | 1.027 | 1.098 | 2.10E-03 |
| cds.Camellia_sinensis.comp18262_c0_seq1_m.23547  | PREDICTED: rubisco accumulation factor 1, chloroplastic [Juglans regia]                                    | 46.625 | 44.25  | 23.2 | 9  | 14 | 9  | 1.007 | 0.999 | 1.037 | 0.986 | 0.981 | 1.013 | 0.979 | 2.39E-01 |



|                                                  |                                                                                     |        |        |      |    |    |    |       |       |       |       |       |       |       |          |
|--------------------------------------------------|-------------------------------------------------------------------------------------|--------|--------|------|----|----|----|-------|-------|-------|-------|-------|-------|-------|----------|
| cds.Camellia_sinensis.comp1827_5_c0_seq1_m.34006 | PREDICTED:<br>ribulose-phosphate 3-epimerase, cytoplasmic isoform [Juglans regia]   | 23.882 | 55.258 | 16.7 | 3  | 7  | 3  | 1.018 | 1.002 | 0.975 | 0.975 | 1.053 | 1.047 | 1.027 | 4.04E-01 |
| cds.Camellia_sinensis.comp1830_2_c0_seq1_m.26529 | PREDICTED:<br>protein PTST, chloroplastic [Vitis vinifera]                          | 34.652 | 22.395 | 22.7 | 8  | 10 | 8  | 0.998 | 1.052 | 1.032 | 0.966 | 1.004 | 1.016 | 0.969 | 2.18E-01 |
| cds.Camellia_sinensis.comp1833_3_c0_seq1_m.25382 | PREDICTED:<br>putative hydrolase YtaP [Theobroma cacao]                             | 39.856 | 31.934 | 29.7 | 9  | 12 | 9  | 1.055 | 1.036 | 1.024 | 0.943 | 0.963 | 0.935 | 0.912 | 1.72E-03 |
| cds.Camellia_sinensis.comp1834_0_c0_seq1_m.45325 | PREDICTED:<br>nucC domain-containing protein 2 [Vitis vinifera] photosystem II CP43 | 16.52  | 3.266  | 11.3 | 2  | 2  | 2  | 1.013 | 0.998 | 0.996 | 1.019 | 1.005 | 0.979 | 0.999 | 9.16E-01 |
| cds.Camellia_sinensis.comp1834_3_c0_seq1_m.1417  | chlorophyll 1 apoprotein (chloroplast) [Actinidia deliciosa]                        | 51.821 | 237.61 | 32.3 | 14 | 78 | 14 | 1.006 | 1.003 | 1.016 | 0.991 | 0.999 | 0.989 | 0.985 | 3.66E-02 |





|                                                  |                                                                  |        |        |      |    |    |    |       |       |       |       |       |       |       |          |
|--------------------------------------------------|------------------------------------------------------------------|--------|--------|------|----|----|----|-------|-------|-------|-------|-------|-------|-------|----------|
|                                                  | PREDICT                                                          |        |        |      |    |    |    |       |       |       |       |       |       |       |          |
|                                                  | ED:                                                              |        |        |      |    |    |    |       |       |       |       |       |       |       |          |
| cds.Camellia_sinensis.comp1851_2_c0_seq1_m.27140 | protein SLOW GREEN 1, chloroplastic [Cucumis sativus]            | 35.31  | 18.754 | 15.8 | 6  | 8  | 6  | 1.013 | 1.048 | 1.06  | 0.976 | 0.951 | 0.914 | 0.91  | 1.59E-02 |
|                                                  | PREDICT                                                          |        |        |      |    |    |    |       |       |       |       |       |       |       |          |
|                                                  | ED:                                                              |        |        |      |    |    |    |       |       |       |       |       |       |       |          |
| cds.Camellia_sinensis.comp1855_6_c0_seq1_m.41305 | probable glutathione S-transferase [Jatropha curcas]             | 28.249 | 11.49  | 14.9 | 3  | 5  | 3  | 1.029 | 0.803 | 0.971 | 1.115 | 0.958 | 1.07  | 1.121 | 2.49E-01 |
|                                                  | PREDICT                                                          |        |        |      |    |    |    |       |       |       |       |       |       |       |          |
|                                                  | ED:                                                              |        |        |      |    |    |    |       |       |       |       |       |       |       |          |
| cds.Camellia_sinensis.comp1857_1_c0_seq1_m.11928 | peroxisomal acyl-coenzyme A oxidase 1-like [Nelumbo nucifera]    | 74.191 | 134.07 | 26.7 | 18 | 33 | 18 | 0.999 | 0.992 | 0.998 | 1.011 | 0.99  | 0.995 | 1.002 | 7.48E-01 |
|                                                  | PREDICT                                                          |        |        |      |    |    |    |       |       |       |       |       |       |       |          |
|                                                  | ED: high mobility group B protein 1 [Vigna radiata var. radiata] |        |        |      |    |    |    |       |       |       |       |       |       |       |          |
| cds.Camellia_sinensis.comp1858_5_c0_seq1_m.48894 |                                                                  | 13.703 | 3.5973 | 10.9 | 1  | 1  | 1  | 0.938 | 1.009 | 0.974 | 1.043 | 1.054 | 1.005 | 1.062 | 7.74E-02 |

|                                                  |                                                                                        |        |        |      |   |    |   |       |       |       |       |       |       |       |          |
|--------------------------------------------------|----------------------------------------------------------------------------------------|--------|--------|------|---|----|---|-------|-------|-------|-------|-------|-------|-------|----------|
| cds.Camellia_sinensis.comp1860_2_c0_seq1_m.17410 | PREDICTED:<br>aldehyde dehydrogenase family 3 member F1-like<br>[Nicotiana sylvestris] | 54.591 | 21.556 | 12.7 | 6 | 7  | 5 | 1.152 | 1.168 | 1.139 | 0.856 | 0.831 | 0.792 | 0.717 | 1.45E-04 |
| cds.Camellia_sinensis.comp1862_6_c0_seq1_m.19241 | PREDICTED: LL-diaminopimelate aminotransferase, chloroplastic-like<br>[Juglans regia]  | 50.211 | 64.002 | 23.3 | 9 | 18 | 9 | 1.003 | 1     | 1.005 | 1.019 | 0.992 | 0.981 | 0.995 | 6.79E-01 |
| cds.Camellia_sinensis.comp1867_4_c0_seq1_m.44439 | PREDICTED: histone H1<br>[Jatropha curcas]                                             | 22.575 | 6.4584 | 16.4 | 3 | 6  | 3 | 0.936 | 0.907 | 0.951 | 1.124 | 1.127 | 1.095 | 1.198 | 4.17E-04 |
| cds.Camellia_sinensis.comp1870_4_c0_seq1_m.42749 | PREDICTED: auxin-binding protein T85<br>[Juglans regia]                                | 23.213 | 1.3899 | 5.9  | 1 | 1  | 1 |       |       |       |       |       |       |       |          |
| cds.Camellia_sinensis.comp1870_7_c0_seq1_m.44851 | maternal effect embryo arrest protein, putative<br>[Medicago truncatula]               | 21.877 | 5.5153 | 9.9  | 2 | 3  | 2 | 1.001 | 0.962 | 0.976 | 1.002 | 0.994 | 0.993 | 1.017 | 2.28E-01 |

|                                                  |                                                                                           |        |        |      |   |    |   |       |       |       |       |       |       |       |          |
|--------------------------------------------------|-------------------------------------------------------------------------------------------|--------|--------|------|---|----|---|-------|-------|-------|-------|-------|-------|-------|----------|
| cds.Camellia_sinensis.comp1871_9_c0_seq1_m.23468 | PREDICT<br>ED: UBX domain-containing protein 4 [Vitis vinifera]                           | 46.727 | 33.359 | 22.1 | 8 | 13 | 8 | 1.061 | 1.061 | 1.045 | 0.953 | 0.931 | 0.955 | 0.896 | 3.39E-04 |
| cds.Camellia_sinensis.comp1872_4_c0_seq1_m.36095 | PREDICT<br>ED: DNA-damage-repair/tolerance protein DRT111, chloroplastic [Vitis vinifera] | 22.122 | 2.7568 | 13.2 | 2 | 2  | 2 | 0.905 | 1.536 | 0.842 | 0.875 | 0.845 | 0.98  | 0.822 | 4.58E-01 |
| cds.Camellia_sinensis.comp1872_6_c0_seq1_m.54824 | PREDICT<br>ED: leucine aminopeptidase 2, chloroplastic-like [Erythranthe guttata]         | 13.911 | 11.898 | 56.1 | 7 | 12 | 3 | 0.955 | 0.982 | 0.981 | 1.058 | 1.039 | 1.036 | 1.074 | 3.20E-03 |
| cds.Camellia_sinensis.comp1874_6_c0_seq2_m.39329 | PREDICT<br>ED: stem-specific protein TSJT1-like [Daucus carota subsp. sativus]            | 27.702 | 10.723 | 16.3 | 3 | 4  | 3 | 0.823 | 0.992 | 0.811 | 1.265 | 1.082 | 1.143 | 1.329 | 2.25E-02 |

|                                |                                                                                             |        |        |      |    |    |    |       |       |       |       |       |       |       |          |
|--------------------------------|---------------------------------------------------------------------------------------------|--------|--------|------|----|----|----|-------|-------|-------|-------|-------|-------|-------|----------|
| cds.Camellia_sinensis.comp1879 | PREDICTED: acyl-coenzyme A thioesterase 9, mitochondrial-like isoform X2 [Sesamum indicum]  | 15.618 | 5.7794 | 8.1  | 1  | 2  | 1  | 0.956 | 1.029 | 1.02  | 0.956 | 1.029 | 1.022 | 1.001 | 9.85E-01 |
| cds.Camellia_sinensis.comp1883 | PREDICTED: 4-coumarate-CoA ligase-like 5 [Sesamum indicum]                                  | 59.674 | 81.874 | 25.3 | 10 | 13 | 10 | 0.952 | 0.967 | 0.979 | 1.022 | 1.035 | 0.996 | 1.053 | 2.01E-02 |
| cds.Camellia_sinensis.comp1885 | isocitrate dehydrogenase family protein [Populus trichocarpa]                               | 47.749 | 319.14 | 48.8 | 22 | 63 | 19 | 0.987 | 0.971 | 0.958 | 1.027 | 1.04  | 1.028 | 1.061 | 3.32E-03 |
| cds.Camellia_sinensis.comp1885 | PREDICTED: protein LOW PSII ACCUMULATION 1, chloroplastic-like isoform X2 [Malus domestica] | 34.093 | 28.674 | 8.1  | 2  | 3  | 2  | 0.983 | 1.035 | 1.049 | 1.014 | 1.076 | 0.949 | 0.991 | 8.19E-01 |











|                                                  |                                                                              |        |        |      |   |   |   |       |       |       |       |       |       |       |          |
|--------------------------------------------------|------------------------------------------------------------------------------|--------|--------|------|---|---|---|-------|-------|-------|-------|-------|-------|-------|----------|
| cds.Camellia_sinensis.comp1909_9_c0_seq1_m.55604 | PREDICT ED: pectinesterase 2.2-like [Juglans regia]                          | 14.265 | 17.85  | 29.8 | 3 | 5 | 3 | 1.037 | 1     | 0.985 | 0.977 | 1.006 | 0.949 | 0.97  | 2.54E-01 |
| cds.Camellia_sinensis.comp1910_6_c0_seq1_m.54673 | PREDICT ED: TVP38/TMEM64 family membrane protein slr0305 [Solanum tuberosum] | 15.644 | 10.132 | 17.7 | 4 | 6 | 4 | 1.031 | 1.049 | 1.045 | 0.946 | 0.922 | 0.976 | 0.91  | 5.44E-03 |
| cds.Camellia_sinensis.comp1912_4_c0_seq1_m.32589 | PREDICT ED: zinc-finger homeodomain protein 1-like [Nelumbo nucifera]        | 25.921 | 1.7656 | 4.3  | 1 | 1 | 1 |       |       |       |       |       |       |       |          |
| cds.Camellia_sinensis.comp1914_5_c0_seq1_m.46398 | PREDICT ED: profilin-1 [Vitis vinifera]                                      | 15.464 | 4.5685 | 22.7 | 3 | 9 | 1 | 1.156 | 1.047 | 1.031 | 0.901 | 0.927 | 0.911 | 0.847 | 1.10E-02 |
| cds.Camellia_sinensis.comp1917_0_c0_seq1_m.26266 | PREDICT ED: COP9 signalosome complex subunit 2 [Sesamum                      | 51.367 | 2.4245 | 6.6  | 2 | 2 | 2 | 1.012 | 1.143 | 1.135 | 0.845 | 0.818 | 1.025 | 0.817 | 6.35E-02 |





|                                                  |                                                                                  |        |        |      |   |    |   |       |       |       |       |       |       |       |          |
|--------------------------------------------------|----------------------------------------------------------------------------------|--------|--------|------|---|----|---|-------|-------|-------|-------|-------|-------|-------|----------|
| cds.Camellia_sinensis.comp1945_6_c0_seq1_m.42200 | PREDICT<br>ED:<br>subtilisin-like protease SBT1.7 [Solanum pennellii]            | 28.352 | 4.9272 | 8.7  | 2 | 3  | 2 | 0.981 | 1.036 | 0.966 | 0.984 | 1.113 | 0.933 | 1.016 | 8.25E-01 |
| cds.Camellia_sinensis.comp1945_6_c1_seq1_m.50009 | PREDICT<br>ED:<br>subtilisin-like protease SBT1.7 [Ricinus communis]             | 17.152 | 13.568 | 14.4 | 2 | 4  | 2 | 0.97  | 0.98  | 0.979 | 1.035 | 1.042 | 1.013 | 1.055 | 4.22E-03 |
| cds.Camellia_sinensis.comp1946_3_c0_seq1_m.40348 | PREDICT<br>ED: serine hydroxymethyltransferase, mitochondrial [Nelumbo nucifera] | 34.043 | 18.047 | 30.2 | 6 | 20 | 2 | 1.1   | 1.11  | 1.048 | 0.935 | 0.88  | 0.949 | 0.848 | 4.86E-03 |
| cds.Camellia_sinensis.comp1950_3_c0_seq1_m.33408 | PREDICT<br>ED:<br>ubiquitin-activating enzyme E1 1 isoform X2 [Vitis vinifera]   | 45.411 | 7.1689 | 11.3 | 6 | 7  | 5 | 1.006 | 0.987 | 1.016 | 1.012 | 1.004 | 0.994 | 1     | 9.72E-01 |

|                                                 |                                                                                                                    |        |        |      |   |   |   |       |       |       |       |       |       |       |          |
|-------------------------------------------------|--------------------------------------------------------------------------------------------------------------------|--------|--------|------|---|---|---|-------|-------|-------|-------|-------|-------|-------|----------|
| cds.Camellia_sinensis.comp19518_c0_seq1_m.41879 | PREDICTED:<br>glycine cleavage system H protein 2, mitochondrial-like isoform X2<br>[Daucus carota subsp. sativus] | 16.799 | 11.036 | 18.8 | 3 | 7 | 3 | 1.063 | 1.061 | 1.071 | 0.94  | 0.915 | 0.975 | 0.886 | 2.27E-02 |
| cds.Camellia_sinensis.comp19519_c0_seq1_m.29936 | PREDICTED:<br>nuclear transcription factor Y subunit B-3 [Vitis vinifera]                                          | 21.98  | 5.425  | 10.1 | 2 | 2 | 2 | 0.966 | 0.949 | 1.032 | 0.856 | 1.078 | 1.126 | 1.038 | 7.43E-01 |
| cds.Camellia_sinensis.comp19526_c0_seq1_m.10489 | PREDICTED:<br>protein LUTEIN DEFICIENT 5, chloroplast isoform X2<br>[Jatropha curcas]                              | 39.348 | 4.1567 | 12.2 | 3 | 3 | 3 | 0.999 | 1.057 | 1.003 | 0.992 | 0.921 | 1.03  | 0.962 | 3.53E-01 |





|                                                  |                                                                                          |        |        |      |   |   |   |       |       |       |       |       |       |       |          |
|--------------------------------------------------|------------------------------------------------------------------------------------------|--------|--------|------|---|---|---|-------|-------|-------|-------|-------|-------|-------|----------|
| cds.Camellia_sinensis.comp1966_4_c1_seq1_m.22757 | PREDICTED: inner membrane protein PPF-1, chloroplastic isoform X2<br>[Nelumbo nucifera]  | 43.585 | 25.629 | 15.1 | 5 | 8 | 5 | 1.136 | 1.121 | 1.084 | 0.837 | 0.825 | 0.888 | 0.763 | 5.19E-04 |
| cds.Camellia_sinensis.comp1968_3_c0_seq1_m.22038 | PREDICTED: LETM1 and EF-hand domain-containing protein 1, mitochondrial [Vitis vinifera] | 53.297 | 3.9721 | 4.9  | 2 | 2 | 2 | 1.068 | 1.053 | 0.996 | 1.041 | 0.891 | 0.948 | 0.924 | 1.82E-01 |
| cds.Camellia_sinensis.comp1969_9_c0_seq1_m.35253 | PREDICTED: peptidyl-prolyl cis-trans isomerase FKBP18, chloroplastic [Sesamum indicum]   | 24.57  | 10.477 | 16.7 | 4 | 6 | 4 | 1.043 | 1.073 | 1.04  | 0.922 | 0.985 | 0.943 | 0.903 | 9.38E-03 |





|                                                  |                                                                          |        |        |      |   |    |   |       |       |       |       |       |       |       |          |
|--------------------------------------------------|--------------------------------------------------------------------------|--------|--------|------|---|----|---|-------|-------|-------|-------|-------|-------|-------|----------|
| PREDICT                                          |                                                                          |        |        |      |   |    |   |       |       |       |       |       |       |       |          |
| cds.Camellia_sinensis.comp1993_9_c0_seq1_m.14793 | ED: primary amine oxidase [Vitis vinifera]                               | 44.631 | 72.491 | 21   | 8 | 17 | 8 | 0.953 | 0.968 | 0.96  | 1.066 | 1.052 | 1.035 | 1.094 | 7.36E-04 |
| PREDICT                                          |                                                                          |        |        |      |   |    |   |       |       |       |       |       |       |       |          |
| cds.Camellia_sinensis.comp1993_9_c0_seq1_m.14794 | ED: primary amine oxidase [Vitis vinifera]                               | 42.04  | 52.822 | 17.2 | 6 | 11 | 6 | 0.961 | 0.966 | 0.944 | 1.083 | 1.001 | 1.046 | 1.09  | 2.26E-02 |
| PREDICT                                          |                                                                          |        |        |      |   |    |   |       |       |       |       |       |       |       |          |
| cds.Camellia_sinensis.comp1994_1_c0_seq1_m.6705  | ED: golgin candidate 6 isoform X2 [Jatropha curcas]                      | 101.47 | 29.054 | 7.6  | 6 | 8  | 6 | 1.037 | 1.035 | 0.99  | 0.982 | 0.926 | 1.006 | 0.952 | 1.59E-01 |
| PREDICT                                          |                                                                          |        |        |      |   |    |   |       |       |       |       |       |       |       |          |
| cds.Camellia_sinensis.comp2000_2_c0_seq1_m.34779 | ED: zinc finger CCCH domain-containing protein 14-like [Ziziphus jujuba] | 31.895 | 60.409 | 35.2 | 8 | 18 | 6 | 0.944 | 0.98  | 1.032 | 0.986 | 1.009 | 1.034 | 1.025 | 4.43E-01 |

|                                                  |                                                                                                              |        |        |      |    |    |    |       |       |       |       |       |       |       |          |
|--------------------------------------------------|--------------------------------------------------------------------------------------------------------------|--------|--------|------|----|----|----|-------|-------|-------|-------|-------|-------|-------|----------|
|                                                  | PREDICT<br>ED: ATP-<br>dependent<br>Clp                                                                      |        |        |      |    |    |    |       |       |       |       |       |       |       |          |
| cds.Camellia_sinensis.comp2001_2_c0_seq1_m.22176 | protease<br>proteolytic<br>subunit-<br>related<br>protein 1,<br>chloroplast<br>ic-like<br>[Juglans<br>regia] | 43.231 | 58.739 | 29.7 | 9  | 15 | 9  | 1.017 | 1.028 | 1.013 | 0.984 | 0.946 | 0.981 | 0.952 | 2.10E-02 |
|                                                  | PREDICT<br>ED:                                                                                               |        |        |      |    |    |    |       |       |       |       |       |       |       |          |
| cds.Camellia_sinensis.comp2001_9_c0_seq1_m.41433 | chaperone<br>protein<br>DnaJ-like<br>[Setaria<br>italica]                                                    | 14.528 | 2.5125 | 8.7  | 1  | 1  | 1  | 1.009 | 1.006 | 1.066 | 0.936 | 0.965 | 1.018 | 0.947 | 1.54E-01 |
|                                                  | PREDICT<br>ED:                                                                                               |        |        |      |    |    |    |       |       |       |       |       |       |       |          |
| cds.Camellia_sinensis.comp2004_3_c0_seq2_m.7680  | spermatog<br>enesis-<br>associated<br>protein 20<br>[Prunus<br>mume]                                         | 95.843 | 99.765 | 28   | 23 | 31 | 23 | 0.953 | 0.937 | 0.929 | 1.073 | 1.084 | 1.104 | 1.157 | 2.01E-04 |
|                                                  | PREDICT<br>ED:                                                                                               |        |        |      |    |    |    |       |       |       |       |       |       |       |          |
| cds.Camellia_sinensis.comp2006_4_c0_seq1_m.24530 | probable<br>protein<br>phosphatas<br>e 2C 9<br>[Sesamum<br>indicum]                                          | 30.483 | 61.517 | 54.3 | 12 | 18 | 12 | 0.94  | 0.992 | 0.934 | 1.089 | 1.032 | 1.079 | 1.117 | 1.21E-02 |

|                                |                                                                         |        |        |      |    |    |    |       |       |       |       |       |       |       |          |
|--------------------------------|-------------------------------------------------------------------------|--------|--------|------|----|----|----|-------|-------|-------|-------|-------|-------|-------|----------|
| cds.Camellia_sinensis.comp2007 | glucose-6-phosphate 1-dehydrogenase 1, chloroplastic [Ricinus communis] | 67.78  | 83.071 | 31   | 17 | 25 | 12 | 0.964 | 0.948 | 0.988 | 1.048 | 1.039 | 1.029 | 1.074 | 5.38E-03 |
|                                | PREDICTED:                                                              |        |        |      |    |    |    |       |       |       |       |       |       |       |          |
| cds.Camellia_sinensis.comp2008 | ketol-acid reductoisomerase, chloroplastic [Juglans regia]              | 66.766 | 177.9  | 25.3 | 14 | 44 | 14 | 0.977 | 0.998 | 1.007 | 1.02  | 1.002 | 1.012 | 1.017 | 1.69E-01 |
|                                | PREDICTED:                                                              |        |        |      |    |    |    |       |       |       |       |       |       |       |          |
| cds.Camellia_sinensis.comp2009 | vacuolar fusion protein CCZ1 homolog isoform X2 [Theobroma cacao]       | 55.404 | 20.741 | 15.4 | 8  | 10 | 8  | 0.887 | 0.938 | 0.937 | 1.117 | 1.073 | 1.083 | 1.185 | 1.54E-03 |
|                                | PREDICTED:                                                              |        |        |      |    |    |    |       |       |       |       |       |       |       |          |
| cds.Camellia_sinensis.comp2012 | trichohyalin-like [Malus domestica]                                     | 19.675 | 1.2552 | 4.2  | 1  | 1  | 1  | 1.082 | 1.031 | 1.033 | 0.882 | 0.861 | 1.091 | 0.901 | 2.26E-01 |

|                                                 |                                                                                                                           |        |        |      |    |    |    |       |       |       |       |       |       |       |          |
|-------------------------------------------------|---------------------------------------------------------------------------------------------------------------------------|--------|--------|------|----|----|----|-------|-------|-------|-------|-------|-------|-------|----------|
| cds.Camellia_sinensis.comp20127_c0_seq1_m.15233 | PREDICTED:<br>phospho-2-dehydro-3-deoxyheptonate aldolase 2, chloroplastic [Eucalyptus grandis]                           | 57.502 | 122.44 | 34.7 | 18 | 36 | 12 | 1.088 | 1.055 | 1.113 | 0.919 | 0.918 | 0.87  | 0.831 | 1.50E-03 |
| cds.Camellia_sinensis.comp20145_c0_seq1_m.31992 | PREDICTED:<br>uncharacterized aarF domain-containing protein kinase At1g71810, chloroplastic isoform X1[Nelumbo nucifera] | 17.901 | 7.6004 | 14.6 | 2  | 2  | 2  | 0.906 | 0.977 | 0.942 | 0.99  | 1.019 | 1.191 | 1.133 | 1.18E-01 |



|                                                 |                                                                                                                                           |        |        |      |   |   |   |       |       |       |       |       |       |       |          |
|-------------------------------------------------|-------------------------------------------------------------------------------------------------------------------------------------------|--------|--------|------|---|---|---|-------|-------|-------|-------|-------|-------|-------|----------|
| cds.Camellia_sinensis.comp20145_c1_seq1_m.40226 | PREDICTED:<br>uncharacterized aarF domain-containing protein kinase<br>At1g71810,<br>chloroplastic-like isoform X3<br>[Nicotiana tabacum] | 29.818 | 3.4974 | 7.1  | 2 | 3 | 2 | 0.921 | 0.953 | 0.995 | 1.005 | 1.071 | 1.125 | 1.116 | 5.12E-02 |
| cds.Camellia_sinensis.comp20146_c0_seq1_m.59240 |                                                                                                                                           | 10.949 | 1.5604 | 12.9 | 1 | 1 | 1 |       |       |       |       |       |       |       |          |
| cds.Camellia_sinensis.comp20165_c0_seq1_m.36124 | transmembrane protein, putative<br>[Medicago truncatula]<br>PREDICTED:<br>myosin heavy chain, muscle<br>[Nicotiana attenuata]             | 34.814 | 8.2128 | 6.3  | 2 | 3 | 2 | 0.938 | 0.908 | 0.919 | 1.116 | 1.124 | 1.033 | 1.184 | 4.22E-03 |
| cds.Camellia_sinensis.comp20176_c0_seq1_m.38992 |                                                                                                                                           | 19.655 | 33.817 | 17.3 | 3 | 4 | 3 | 1.028 | 0.985 | 0.928 | 0.997 | 1.025 | 1.04  | 1.041 | 2.71E-01 |

|                                                 |                                                                                         |        |        |      |   |    |   |       |       |       |       |       |       |       |          |
|-------------------------------------------------|-----------------------------------------------------------------------------------------|--------|--------|------|---|----|---|-------|-------|-------|-------|-------|-------|-------|----------|
|                                                 | PREDICT<br>ED: UTP--                                                                    |        |        |      |   |    |   |       |       |       |       |       |       |       |          |
| cds.Camellia_sinensis.comp20180_c0_seq1_m.9372  | glucose-1-phosphate uridylyltransferase-like<br>[Juglans regia]                         | 56.669 | 10.518 | 4.3  | 2 | 10 | 2 | 1.018 | 0.966 | 0.999 | 1.001 | 1.012 | 1.033 | 1.021 | 3.05E-01 |
|                                                 | PREDICT<br>ED:<br>NADH                                                                  |        |        |      |   |    |   |       |       |       |       |       |       |       |          |
| cds.Camellia_sinensis.comp20197_c0_seq1_m.39887 | dehydrogenase [ubiquinone] 1 alpha subcomplex subunit 6<br>[Theobroma cacao]            | 14.729 | 44.974 | 76.9 | 9 | 20 | 9 | 1.038 | 1.022 | 1.02  | 0.977 | 1.002 | 0.979 | 0.96  | 1.46E-02 |
|                                                 | PREDICT<br>ED:<br>pentatricopeptide repeat-containing protein At1g02150<br>[Eucalyptus] |        |        |      |   |    |   |       |       |       |       |       |       |       |          |
| cds.Camellia_sinensis.comp20212_c0_seq1_m.13881 | pentatricopeptide repeat-containing protein At1g02150<br>[Eucalyptus]                   | 62.958 | 5.9796 | 6.9  | 4 | 5  | 4 | 0.92  | 1.023 | 1.043 | 1.058 | 1.008 | 0.996 | 1.025 | 5.75E-01 |
|                                                 | PREDICT<br>ED: V-type proton ATPase subunit G1-like<br>[Nelumbo]                        |        |        |      |   |    |   |       |       |       |       |       |       |       |          |
| cds.Camellia_sinensis.comp20228_c0_seq1_m.42581 | proton ATPase subunit G1-like<br>[Nelumbo]                                              | 12.309 | 33.272 | 39.1 | 5 | 10 | 5 | 0.907 | 0.92  | 0.837 | 1.103 | 1.033 | 1.106 | 1.217 | 5.98E-03 |

|                                                  |                                                                                              |        |        |      |    |    |    |       |       |       |       |       |       |       |          |
|--------------------------------------------------|----------------------------------------------------------------------------------------------|--------|--------|------|----|----|----|-------|-------|-------|-------|-------|-------|-------|----------|
| cds.Camellia_sinensis.comp2023_5_c0_seq1_m.17959 | PREDICT<br>ED:<br>tryptophan synthase beta chain<br>1 [Populus euphratica]                   | 55.113 | 34.523 | 15.9 | 6  | 6  | 6  | 1.039 | 0.994 | 1.074 | 0.964 | 0.973 | 1.065 | 0.966 | 4.20E-01 |
| cds.Camellia_sinensis.comp2032_6_c0_seq2_m.55870 | PREDICT<br>ED:<br>puromycin -sensitive aminopeptidase isoform X1 [Vitis vinifera]            | 14.287 | 40.178 | 52.7 | 5  | 12 | 4  | 0.987 | 0.932 | 0.9   | 1.029 | 1.072 | 1.081 | 1.129 | 1.70E-02 |
| cds.Camellia_sinensis.comp2033_2_c0_seq1_m.49077 | PREDICT<br>ED: 60S ribosomal protein L19-3<br>[Ziziphus jujuba]                              | 11.977 | 2.2131 | 32.7 | 3  | 5  | 1  |       |       |       |       |       |       |       |          |
| cds.Camellia_sinensis.comp2033_9_c0_seq1_m.25394 | PREDICT<br>ED:<br>eukaryotic translation initiation factor 4E-1-like<br>[Arachis duranensis] | 26.025 | 3.4247 | 8.6  | 2  | 2  | 2  |       |       |       |       |       |       |       |          |
| cds.Camellia_sinensis.comp2033_9_c1_seq1_m.9048  | PREDICT<br>ED:<br>phospholipase D alpha 1<br>[Sesamum indicum]                               | 92.214 | 249.4  | 35.8 | 23 | 57 | 21 | 0.923 | 0.912 | 0.914 | 1.095 | 1.114 | 1.067 | 1.192 | 1.79E-04 |

|                                                  |                                                                                                       |        |        |      |    |     |   |       |       |       |       |       |       |       |          |
|--------------------------------------------------|-------------------------------------------------------------------------------------------------------|--------|--------|------|----|-----|---|-------|-------|-------|-------|-------|-------|-------|----------|
| cds.Camellia_sinensis.comp2034_4_c1_seq1_m.50331 | seed maturation protein PM35 [Glycine max] PREDICTED:                                                 | 11.078 | 25.316 | 37.4 | 3  | 4   | 3 | 0.938 | 1.134 | 0.852 | 1.004 | 0.981 | 1.159 | 1.075 | 4.80E-01 |
| cds.Camellia_sinensis.comp2034_6_c0_seq1_m.45093 | photosynthetic NDH subunit of subcomplex B 3, chloroplastic [Daucus carota subsp. sativus] PREDICTED: | 21.322 | 20.289 | 21.1 | 3  | 5   | 3 | 1.043 | 1.062 | 1.058 | 0.923 | 0.939 | 0.99  | 0.902 | 8.84E-03 |
| cds.Camellia_sinensis.comp2034_7_c0_seq1_m.30439 | cysteine protease RD19A [Ipomoea nil] PREDICTED:                                                      | 40.173 | 6.8764 | 9    | 3  | 7   | 2 | 1.101 | 1.134 | 1.055 | 0.871 | 0.874 | 0.886 | 0.8   | 4.98E-04 |
| cds.Camellia_sinensis.comp2034_9_c0_seq1_m.22493 | ferredoxin-NADP reductase, leaf isozyme, chloroplastic [Ricinus communis]                             | 40.573 | 293.46 | 56.9 | 20 | 103 | 7 | 1.043 | 1.018 | 0.971 | 0.982 | 0.984 | 0.989 | 0.975 | 3.54E-01 |



|                                                 |                                                                                     |        |        |      |    |    |    |       |       |       |       |       |       |       |          |
|-------------------------------------------------|-------------------------------------------------------------------------------------|--------|--------|------|----|----|----|-------|-------|-------|-------|-------|-------|-------|----------|
| cds.Camellia_sinensis.comp20367_c0_seq1_m.18869 | PREDICT ED: flowering locus K homology domain isoform X1 [Ricinus communis]         | 46.807 | 138.72 | 33.3 | 13 | 28 | 11 | 0.962 | 1.014 | 0.994 | 1.018 | 1.003 | 0.995 | 1.015 | 4.05E-01 |
| cds.Camellia_sinensis.comp20368_c0_seq2_m.30637 | PREDICT ED: UPF0613 protein PB24D3.0 6c [Populus euphratica]                        | 27.726 | 26.399 | 4.8  | 1  | 1  | 1  | 1.015 | 0.934 | 0.995 | 0.943 | 1.134 | 0.99  | 1.042 | 5.60E-01 |
| cds.Camellia_sinensis.comp20369_c0_seq1_m.35674 | PREDICT ED: thioredoxin-like protein CDSP32, chloroplastic [Nelumbo nucifera]       | 33.819 | 205    | 43.9 | 13 | 41 | 13 | 1.063 | 1.04  | 1.039 | 0.96  | 0.928 | 0.959 | 0.906 | 1.82E-03 |
| cds.Camellia_sinensis.comp20371_c0_seq2_m.34391 | PREDICT ED: probable trans-2-enoyl-CoA reductase, mitochondrial isoform X3 [Juglans | 38.069 | 4.0837 | 6.6  | 2  | 3  | 2  | 0.926 | 0.995 | 1.04  | 1.012 | 1.04  | 1.008 | 1.033 | 3.90E-01 |

|                                                  |                                                                                           |        |        |      |   |    |   |       |       |       |       |       |       |       |          |
|--------------------------------------------------|-------------------------------------------------------------------------------------------|--------|--------|------|---|----|---|-------|-------|-------|-------|-------|-------|-------|----------|
|                                                  | PREDICT<br>ED:<br>probable                                                                |        |        |      |   |    |   |       |       |       |       |       |       |       |          |
| cds.Camellia_sinensis.comp2038_0_c0_seq1_m.14804 | carotenoid cleavage dioxygenase 4, chloroplastic<br>[Nicotiana attenuata]                 | 47.042 | 65.941 | 18.3 | 8 | 13 | 8 | 1.005 | 1.005 | 1.021 | 1.011 | 0.968 | 0.965 | 0.971 | 1.39E-01 |
|                                                  | PREDICT<br>ED:<br>trafficking protein particle complex subunit 12-like<br>[Vitis]         |        |        |      |   |    |   |       |       |       |       |       |       |       |          |
| cds.Camellia_sinensis.comp2038_2_c0_seq1_m.29159 | trafficking protein particle complex subunit 12-like<br>[Vitis]                           | 40.524 | 1.272  | 2.5  | 1 | 1  | 1 |       |       |       |       |       |       |       |          |
|                                                  | PREDICT<br>ED: zeta-                                                                      |        |        |      |   |    |   |       |       |       |       |       |       |       |          |
| cds.Camellia_sinensis.comp2038_5_c0_seq1_m.15507 | carotene desaturase, chloroplastic/chromoplastic<br>[Vitis vinifera]                      | 64.292 | 12.08  | 9.3  | 5 | 6  | 5 | 1.057 | 1.056 | 0.933 | 0.9   | 0.896 | 0.987 | 0.914 | 1.60E-01 |
|                                                  | PREDICT<br>ED:<br>flavonol synthase/flavanone 3-hydroxylase-like<br>[Erythranthe guttata] |        |        |      |   |    |   |       |       |       |       |       |       |       |          |
| cds.Camellia_sinensis.comp2038_7_c0_seq1_m.31718 | flavonol synthase/flavanone 3-hydroxylase-like<br>[Erythranthe guttata]                   | 38.417 | 15.974 | 6.2  | 2 | 2  | 2 | 0.95  | 1.008 | 0.948 | 1.026 | 1.046 | 1.043 | 1.072 | 2.92E-02 |

|                                                  |                                                                                            |        |        |      |   |   |   |       |       |       |       |       |       |       |          |
|--------------------------------------------------|--------------------------------------------------------------------------------------------|--------|--------|------|---|---|---|-------|-------|-------|-------|-------|-------|-------|----------|
| cds.Camellia_sinensis.comp2039_0_c0_seq1_m.30556 | PREDICT ED: protein SRC2 [Vitis vinifera]                                                  | 30.677 | 2.8683 | 3.5  | 1 | 1 | 1 | 0.976 | 0.976 | 0.982 | 1.036 | 1.031 | 1.019 | 1.052 | 6.84E-04 |
| cds.Camellia_sinensis.comp2040_1_c0_seq1_m.19860 | PREDICT ED: kynurenine -- oxoglutarate transaminase [Jatropha curcas]                      | 36.248 | 7.9103 | 14.9 | 5 | 6 | 5 | 0.976 | 0.977 | 1.076 | 0.971 | 0.997 | 0.99  | 0.977 | 5.32E-01 |
| cds.Camellia_sinensis.comp2040_1_c0_seq1_m.19861 | PREDICT ED: probable N-succinyl diaminopimelate aminotransferase DapC [Gossypium hirsutum] | 22.039 | 29.962 | 32.8 | 5 | 7 | 5 | 1.031 | 0.971 | 1.011 | 1.011 | 0.95  | 1.021 | 0.99  | 7.32E-01 |
| cds.Camellia_sinensis.comp2040_2_c0_seq1_m.28705 | PREDICT ED: titin-like [Fragaria vesca subsp. vesca]                                       | 19.986 | 4.7872 | 15.1 | 3 | 5 | 3 | 1.118 | 1.203 | 1.17  | 0.851 | 0.85  | 0.771 | 0.708 | 9.00E-04 |



|                                                  |                                                                                                                                                                                                                                                                   |        |        |      |   |   |   |       |       |       |       |       |       |       |          |
|--------------------------------------------------|-------------------------------------------------------------------------------------------------------------------------------------------------------------------------------------------------------------------------------------------------------------------|--------|--------|------|---|---|---|-------|-------|-------|-------|-------|-------|-------|----------|
| cds.Camellia_sinensis.comp2040_3_c0_seq1_m.21322 | oligouridylation-binding protein 1B-like [Cajanus] PREDICTED: beta-carotene hydroxylase 2, chloroplastic [Vitis vinifera] PREDICTED: heterogenous nuclear ribonucleoprotein R [Sesamum indicum] PREDICTED: ALBINO3-like protein 1, chloroplastic [Vitis vinifera] | 46.646 | 25.619 | 12.9 | 5 | 8 | 4 | 0.979 | 0.951 | 1.003 | 1.051 | 1.025 | 0.93  | 1.025 | 5.92E-01 |
| cds.Camellia_sinensis.comp2040_4_c0_seq1_m.31114 |                                                                                                                                                                                                                                                                   | 39.932 | 9.2243 | 5.6  | 1 | 1 | 1 | 0.749 | 0.985 | 0.955 | 1.074 | 1.044 | 1.246 | 1.251 | 9.00E-02 |
| cds.Camellia_sinensis.comp2040_6_c0_seq2_m.22795 |                                                                                                                                                                                                                                                                   | 47.84  | 5.6169 | 5.7  | 2 | 2 | 2 | 0.949 | 0.988 | 1.108 | 1.032 | 0.924 | 1.013 | 0.975 | 6.95E-01 |
| cds.Camellia_sinensis.comp2040_7_c0_seq1_m.12567 |                                                                                                                                                                                                                                                                   | 59.727 | 42.745 | 8.1  | 4 | 7 | 4 | 1.016 | 0.97  | 1.074 | 0.981 | 0.968 | 0.947 | 0.946 | 1.56E-01 |

|                                                  |                                                                              |        |        |      |    |    |    |       |       |       |       |       |       |       |          |
|--------------------------------------------------|------------------------------------------------------------------------------|--------|--------|------|----|----|----|-------|-------|-------|-------|-------|-------|-------|----------|
|                                                  | PREDICT<br>ED:                                                               |        |        |      |    |    |    |       |       |       |       |       |       |       |          |
| cds.Camellia_sinensis.comp2041_2_c0_seq1_m.33374 | proteasome subunit alpha type-6 [Musa acuminata subsp. malaccensis]          | 27.384 | 94.253 | 54.9 | 15 | 27 | 15 | 0.97  | 0.98  | 0.944 | 1.043 | 1.042 | 1.056 | 1.085 | 2.38E-03 |
|                                                  | PREDICT<br>ED:                                                               |        |        |      |    |    |    |       |       |       |       |       |       |       |          |
| cds.Camellia_sinensis.comp2041_8_c0_seq1_m.35269 | tropinone reductase homolog At5g06060-like isoform X1 [Nelumbo nucifera]     | 29.741 | 8.531  | 12   | 4  | 11 | 2  | 0.972 | 0.94  | 0.981 | 1.064 | 1.003 | 1.062 | 1.082 | 2.84E-02 |
|                                                  | PREDICT<br>ED:                                                               |        |        |      |    |    |    |       |       |       |       |       |       |       |          |
| cds.Camellia_sinensis.comp2042_3_c0_seq1_m.35425 | rhodanese-like domain-containing protein 14, chloroplastic [Theobroma cacao] | 25.321 | 57.434 | 31.3 | 7  | 14 | 7  | 0.99  | 0.997 | 0.993 | 1.009 | 1.002 | 0.998 | 1.01  | 6.34E-02 |
|                                                  | PREDICT<br>ED:                                                               |        |        |      |    |    |    |       |       |       |       |       |       |       |          |
| cds.Camellia_sinensis.comp2042_9_c0_seq1_m.24635 | ultraviolet-B receptor UVR8 [Sesamum indicum]                                | 43.849 | 16.632 | 16.7 | 7  | 9  | 7  | 0.985 | 1     | 1.022 | 1.002 | 0.993 | 1.025 | 1.004 | 7.76E-01 |

|                                                  |                                                                                                                                                                |        |        |      |   |   |   |       |       |       |       |       |       |       |          |
|--------------------------------------------------|----------------------------------------------------------------------------------------------------------------------------------------------------------------|--------|--------|------|---|---|---|-------|-------|-------|-------|-------|-------|-------|----------|
| cds.Camellia_sinensis.comp2043_0_c0_seq1_m.35205 | PREDICT<br>ED: 6,7-dimethyl-8-ribityllumazine synthase, chloroplastic<br>[Ipomoea nil]<br>hydrogen peroxide induced protein, putative<br>[Medicago truncatula] | 27.433 | 9.152  | 10.2 | 4 | 6 | 4 | 0.986 | 0.93  | 0.951 | 1.071 | 1.056 | 1.037 | 1.104 | 7.06E-03 |
| cds.Camellia_sinensis.comp2043_3_c0_seq1_m.46290 | PREDICT<br>ED:<br>splicing factor SF3a60 homolog<br>[Juglans regia]                                                                                            | 14.815 | 29.97  | 25.2 | 2 | 2 | 2 | 1.04  | 1.033 | 0.967 | 0.992 | 1.031 | 0.941 | 0.975 | 5.09E-01 |
| cds.Camellia_sinensis.comp2043_6_c0_seq1_m.16763 | PREDICT<br>ED: outer envelope pore protein 24A, chloroplastic-like<br>[Nelumbo nucifera]                                                                       | 61.133 | 19.596 | 11.2 | 5 | 5 | 5 | 1.084 | 1.119 | 1.126 | 0.871 | 0.892 | 0.851 | 0.785 | 1.78E-04 |
| cds.Camellia_sinensis.comp2043_8_c0_seq1_m.37911 |                                                                                                                                                                | 25.464 | 14.584 | 28.3 | 7 | 9 | 7 | 1.036 | 0.996 | 1.014 | 1.006 | 0.983 | 0.985 | 0.976 | 1.54E-01 |



|                                                 |                                                                       |        |        |      |    |    |    |       |       |       |       |       |       |       |          |
|-------------------------------------------------|-----------------------------------------------------------------------|--------|--------|------|----|----|----|-------|-------|-------|-------|-------|-------|-------|----------|
| cds.Camellia_sinensis.comp20463_c0_seq1_m.19640 | PREDICT<br>ED:<br>probable serine protease EDA2<br>[Ziziphus jujuba]  | 54.281 | 109.9  | 25.5 | 10 | 20 | 10 | 1.016 | 1.029 | 1.012 | 0.938 | 1.006 | 0.992 | 0.96  | 1.37E-01 |
| cds.Camellia_sinensis.comp20464_c0_seq1_m.30668 | PREDICT<br>ED: acyl-protein thioesterase 2<br>[Arachis duranensis]    | 27.2   | 4.8794 | 11.4 | 4  | 5  | 4  | 1.084 | 0.983 | 1.03  | 0.95  | 0.967 | 0.988 | 0.938 | 1.06E-01 |
| cds.Camellia_sinensis.comp20467_c0_seq1_m.38457 | PREDICT<br>ED:<br>probable N-acetyltransferase<br>[Juglans regia]     | 19.308 | 1.8495 | 5.9  | 1  | 1  | 1  | 1.027 | 1.069 | 1.025 | 0.921 | 0.984 | 0.967 | 0.92  | 2.58E-02 |
| cds.Camellia_sinensis.comp20469_c0_seq1_m.23763 | PREDICT<br>ED: RAN GTPase-activating protein 1<br>[Vitis vinifera]    | 50.407 | 26.233 | 13.4 | 5  | 6  | 5  | 1.136 | 1.092 | 1.042 | 0.905 | 0.932 | 0.905 | 0.839 | 2.82E-03 |
| cds.Camellia_sinensis.comp20474_c0_seq1_m.33064 | PREDICT<br>ED: GTP-binding nuclear protein Ran-3<br>[Camelina sativa] | 26.072 | 85.929 | 38.1 | 8  | 20 | 8  | 0.999 | 0.963 | 0.987 | 0.998 | 1.038 | 1.031 | 1.04  | 7.32E-02 |

|                                |                                                                        |        |        |      |    |    |    |       |       |       |       |       |       |       |          |
|--------------------------------|------------------------------------------------------------------------|--------|--------|------|----|----|----|-------|-------|-------|-------|-------|-------|-------|----------|
| cds.Camellia_sinensis.comp2047 | PREDICT<br>ED:<br>reticulon-like protein B1 [Ricinus communis]         | 33.99  | 15.592 | 17.9 | 6  | 8  | 6  | 0.991 | 0.982 | 1     | 0.974 | 1.042 | 1.026 | 1.023 | 3.45E-01 |
| cds.Camellia_sinensis.comp2048 | PREDICT<br>ED:<br>glutamate-tRNA ligase, chloroplast [Ziziphus jujuba] | 44.706 | 15.758 | 17.9 | 7  | 11 | 7  | 1.046 | 0.99  | 1.041 | 1.001 | 0.973 | 0.965 | 0.955 | 9.30E-02 |
| cds.Camellia_sinensis.comp2048 | PREDICT<br>ED:<br>glutamate-tRNA ligase, chloroplast [Ipomoea nil]     | 32.179 | 7.6481 | 3.1  | 1  | 1  | 1  | 1.006 | 1.07  | 1.102 | 0.956 | 0.935 | 0.927 | 0.887 | 1.35E-02 |
| cds.Camellia_sinensis.comp2048 | PREDICT<br>ED:<br>TOM1-like protein 2 [Vitis vinifera]                 | 44.052 | 62.16  | 40.1 | 16 | 22 | 16 | 0.972 | 0.987 | 0.981 | 1.026 | 1.031 | 1.014 | 1.045 | 2.80E-03 |



|                                |                                                                                                              |        |        |      |    |     |    |       |       |       |       |       |       |       |          |
|--------------------------------|--------------------------------------------------------------------------------------------------------------|--------|--------|------|----|-----|----|-------|-------|-------|-------|-------|-------|-------|----------|
| cds.Camellia_sinensis.comp2049 | PREDICT<br>ED: non-specific phospholipase C1 isoform X1 [Vitis vinifera]                                     | 37.641 | 14.439 | 12.4 | 4  | 6   | 3  | 1.108 | 1.066 | 1.092 | 0.885 | 0.88  | 0.891 | 0.813 | 6.15E-05 |
| cds.Camellia_sinensis.comp2050 | PREDICT<br>ED: elongation factor Tu, chloroplastic [Juglans regia]                                           | 54.717 | 323.31 | 52.8 | 23 | 115 | 21 | 1.033 | 1.017 | 1.001 | 0.986 | 0.975 | 0.976 | 0.963 | 1.76E-02 |
| cds.Camellia_sinensis.comp2050 | PREDICT<br>ED: ATP-dependent Clp protease proteolytic subunit-related protein 4, chloroplastic [Prunus mume] | 33.119 | 67.173 | 22.7 | 5  | 16  | 5  | 1.031 | 1.004 | 1.01  | 0.983 | 0.987 | 0.996 | 0.974 | 4.24E-02 |
| cds.Camellia_sinensis.comp2050 | tail fiber [Arabidopsis thaliana]                                                                            | 24.764 | 1.7292 | 4    | 1  | 1   | 1  | 0.988 | 0.961 | 1.005 | 0.958 | 1.048 | 1.05  | 1.035 | 3.70E-01 |





|                                                 |                                                                                                      |        |        |      |    |    |    |       |       |       |       |       |       |       |          |
|-------------------------------------------------|------------------------------------------------------------------------------------------------------|--------|--------|------|----|----|----|-------|-------|-------|-------|-------|-------|-------|----------|
| cds.Camellia_sinensis.comp20538_c0_seq1_m.37612 | PREDICTED: small heat shock protein, chloroplast ic-like [Juglans regia]                             | 32.824 | 43.486 | 23.8 | 7  | 16 | 7  | 1.078 | 1.071 | 1.037 | 0.951 | 0.941 | 0.915 | 0.881 | 1.60E-03 |
| cds.Camellia_sinensis.comp20539_c0_seq1_m.30179 | PREDICTED: ATP-dependent Clp protease proteolytic subunit 3, chloroplast ic-like [Nicotiana tabacum] | 39.032 | 93.776 | 18.2 | 6  | 10 | 6  | 1.012 | 1.016 | 1.006 | 0.994 | 1.011 | 0.976 | 0.983 | 1.69E-01 |
| cds.Camellia_sinensis.comp20545_c0_seq1_m.27639 | PREDICTED: short-chain dehydrogenase reductase 2a [Theobroma cacao]                                  | 41.456 | 1.597  | 3.1  | 1  | 1  | 1  | 0.872 | 1.16  | 1.051 | 0.98  | 0.965 | 0.986 | 0.951 | 6.54E-01 |
| cds.Camellia_sinensis.comp20551_c0_seq1_m.32591 | PREDICTED: photosystem I chlorophyll a/b-binding protein 3-1, chloroplast ic [Malus domestica]       | 29.762 | 153.04 | 48.9 | 10 | 64 | 10 | 0.996 | 0.948 | 0.947 | 1.021 | 1.069 | 1.037 | 1.082 | 2.14E-02 |

|                                                  |                                                                 |        |        |      |    |    |    |       |       |       |       |       |       |       |          |
|--------------------------------------------------|-----------------------------------------------------------------|--------|--------|------|----|----|----|-------|-------|-------|-------|-------|-------|-------|----------|
| cds.Camellia_sinensis.comp2055_2_c0_seq1_m.15501 | PREDICT ED: ATP sulfurylase 2 [Vitis vinifera]                  | 44.513 | 33.222 | 26.1 | 10 | 18 | 9  | 0.994 | 0.984 | 0.979 | 1.029 | 0.985 | 1.018 | 1.025 | 1.47E-01 |
| cds.Camellia_sinensis.comp2055_9_c0_seq1_m.21086 | PREDICT ED: protein bem46 [Vitis vinifera] UTP--                | 35.166 | 9.5137 | 7.9  | 2  | 2  | 2  | 1.026 | 1.019 | 0.974 | 1.022 | 0.981 | 0.984 | 0.989 | 6.41E-01 |
| cds.Camellia_sinensis.comp2056_2_c0_seq1_m.18527 | glucose-1-phosphate uridylyltransferase [Ananas comosus]        | 61.834 | 242.88 | 44.9 | 21 | 66 | 21 | 0.976 | 0.969 | 0.984 | 1.014 | 1.037 | 1.027 | 1.051 | 3.24E-03 |
| cds.Camellia_sinensis.comp2056_3_c0_seq1_m.32355 | PREDICT ED: annexin D2-like [Jatropha curcas]                   | 25.672 | 5.4555 | 14.7 | 3  | 3  | 3  | 1.048 | 1.005 | 1.013 | 1.006 | 0.91  | 1.016 | 0.956 | 2.89E-01 |
| cds.Camellia_sinensis.comp2056_8_c0_seq1_m.47712 | PREDICT ED: 60S ribosomal protein L35-like [Gossypium hirsutum] | 16.123 | 8.0699 | 24.8 | 5  | 5  | 2  |       |       |       |       |       |       |       |          |
| cds.Camellia_sinensis.comp2057_2_c0_seq1_m.45714 | PREDICT ED: vesicle transport v-SNARE 12 [Prunus mume]          | 18.709 | 5.5645 | 17.7 | 4  | 4  | 4  | 1.036 | 1.079 | 1.044 | 0.934 | 0.905 | 0.993 | 0.896 | 2.15E-02 |



|                                                 |                                                                                                     |        |        |      |    |     |    |       |       |       |       |       |       |       |          |
|-------------------------------------------------|-----------------------------------------------------------------------------------------------------|--------|--------|------|----|-----|----|-------|-------|-------|-------|-------|-------|-------|----------|
| cds.Camellia_sinensis.comp20614_c0_seq1_m.31139 | PREDICTED:<br>proline synthase co-transcribed bacterial homolog protein isoform X1 [Vitis vinifera] | 30.587 | 14.091 | 16.8 | 5  | 7   | 4  | 1.005 | 0.981 | 0.973 | 1.005 | 1.039 | 1.009 | 1.032 | 9.41E-02 |
| cds.Camellia_sinensis.comp20616_c0_seq1_m.32068 | PREDICTED:<br>oxygen-evolving enhancer protein 1, chloroplastic [Ziziphus jujuba]                   | 35.011 | 323.31 | 52.7 | 21 | 149 | 21 | 1.019 | 0.965 | 0.982 | 0.997 | 1.015 | 1.014 | 1.02  | 3.01E-01 |
| cds.Camellia_sinensis.comp20617_c0_seq1_m.35166 | acid-binding, OB-fold-like protein [Medicago truncatula]                                            | 17.371 | 3.8574 | 19.3 | 4  | 5   | 3  | 0.949 | 0.97  | 0.957 | 1.117 | 1.027 | 1.008 | 1.096 | 4.81E-02 |
| cds.Camellia_sinensis.comp20617_c0_seq2_m.40687 | acid-binding, OB-fold-like protein [Medicago truncatula]                                            | 20.852 | 11.63  | 20.4 | 4  | 9   | 3  | 0.953 | 0.956 | 0.96  | 1.016 | 1.052 | 1.088 | 1.1   | 4.11E-02 |

|                                                 |                                                                                  |        |        |      |    |    |    |       |       |       |       |       |       |       |          |
|-------------------------------------------------|----------------------------------------------------------------------------------|--------|--------|------|----|----|----|-------|-------|-------|-------|-------|-------|-------|----------|
| cds.Camellia_sinensis.comp20618_c0_seq1_m.37751 | PREDICTED: ubiquitin-conjugating enzyme E2 27-like [Populus euphratica]          | 21.23  | 8.4106 | 16   | 3  | 3  | 3  | 0.906 | 0.971 | 1.048 | 1.132 | 0.957 | 1.017 | 1.062 | 4.10E-01 |
| cds.Camellia_sinensis.comp20621_c0_seq1_m.25426 | PREDICTED: AT-hook motif nuclear-localized protein 8 isoform X1 [Vitis vinifera] | 36.627 | 16.336 | 3.9  | 1  | 1  | 1  | 1.063 | 1.015 | 1.043 | 0.985 | 0.969 | 0.921 | 0.921 | 2.75E-02 |
| cds.Camellia_sinensis.comp20622_c0_seq1_m.34048 | glycine-rich RNA-binding family protein [Populus trichocarpa]                    | 31.011 | 10.65  | 6.8  | 2  | 3  | 2  | 1.238 | 1.288 | 1.278 | 0.667 | 0.746 | 0.716 | 0.56  | 7.79E-05 |
| cds.Camellia_sinensis.comp20624_c0_seq1_m.11184 | vestitone reductase-related family protein [Populus trichocarpa]                 | 44.537 | 111.49 | 29.7 | 12 | 28 | 12 | 1.02  | 1.019 | 1.018 | 0.972 | 0.979 | 0.986 | 0.961 | 1.06E-02 |
| cds.Camellia_sinensis.comp20625_c0_seq1_m.16923 | PREDICTED: protein argonaute 4A [Vitis vinifera]                                 | 62.952 | 41.399 | 15.8 | 8  | 14 | 8  | 1.062 | 1.08  | 1.083 | 0.911 | 0.935 | 0.905 | 0.853 | 1.64E-04 |



|                                                  |                                                                                     |        |        |      |    |    |    |       |       |       |       |       |       |       |          |
|--------------------------------------------------|-------------------------------------------------------------------------------------|--------|--------|------|----|----|----|-------|-------|-------|-------|-------|-------|-------|----------|
| cds.Camellia_sinensis.comp2063_5_c0_seq1_m.28179 | PREDICTED: RNA-binding protein CP29B, chloroplastic [Prunumume]                     | 29.591 | 186.76 | 47.8 | 11 | 38 | 11 | 1.001 | 0.998 | 0.994 | 0.995 | 0.998 | 1.014 | 1.005 | 4.97E-01 |
| cds.Camellia_sinensis.comp2063_5_c0_seq2_m.39693 | PREDICTED: 29 kDa ribonucleo protein A, chloroplastic-like [Nelumbonucifera]        | 17.576 | 13.773 | 13   | 4  | 13 | 4  | 0.978 | 0.992 | 0.981 | 1.035 | 0.999 | 1.049 | 1.045 | 4.56E-02 |
| cds.Camellia_sinensis.comp2063_7_c0_seq1_m.49637 | PREDICTED: heterogenous nuclear ribonucleo protein 1 isoform X2 [Gossypiumarboreum] | 10.588 | 2.6968 | 9.7  | 1  | 1  | 1  |       |       |       |       |       |       |       |          |
| cds.Camellia_sinensis.comp2064_8_c0_seq1_m.55086 | PREDICTED: 14-3-3-like protein D isoform X2 [Vitisvinifera]                         | 15.517 | 2.1677 | 10.9 | 2  | 4  | 2  | 1.002 | 0.984 | 1.016 | 1.006 | 0.995 | 1.006 | 1.002 | 8.70E-01 |



|                                |                                                                               |        |        |      |    |    |    |       |       |       |       |       |       |       |          |
|--------------------------------|-------------------------------------------------------------------------------|--------|--------|------|----|----|----|-------|-------|-------|-------|-------|-------|-------|----------|
| cds.Camellia_sinensis.comp2064 | PREDICT<br>ED: 2-keto-3-deoxy-L-rhamnose aldolase-like<br>[Solanum tuberosum] | 38.631 | 7.8286 | 9.8  | 3  | 4  | 3  | 1.031 | 1.046 | 1.074 | 0.889 | 0.9   | 1.005 | 0.887 | 4.06E-02 |
| cds.Camellia_sinensis.comp2065 | PREDICT<br>ED: LDLR chaperone MESD<br>[Vitis vinifera]                        | 28.854 | 14.722 | 18.9 | 5  | 9  | 5  | 1.093 | 1.116 | 1.05  | 0.934 | 0.9   | 0.885 | 0.834 | 1.64E-03 |
| cds.Camellia_sinensis.comp2066 | PREDICT<br>ED: enolase<br>[Sesamum indicum]                                   | 52.402 | 303.44 | 49.8 | 21 | 68 | 15 | 0.984 | 0.965 | 0.932 | 1.048 | 1.052 | 1.047 | 1.092 | 3.09E-02 |
| cds.Camellia_sinensis.comp2067 | PREDICT<br>ED: endoplasmic in homolog<br>[Ziziphus alba]                      | 72.803 | 107.79 | 27.7 | 16 | 33 | 16 | 0.953 | 0.964 | 0.963 | 1.025 | 1.059 | 1.059 | 1.091 | 1.60E-03 |
| cds.Camellia_sinensis.comp2067 | DNA/RN A-binding protein<br>[Medicago truncatula]                             | 22.119 | 6.4583 | 19.6 | 5  | 8  | 1  | 0.929 | 1.005 | 1.05  | 0.995 | 0.968 | 1.069 | 1.016 | 7.43E-01 |

|                                                  |                                                                                                 |        |        |      |   |    |   |       |       |       |       |       |       |       |          |
|--------------------------------------------------|-------------------------------------------------------------------------------------------------|--------|--------|------|---|----|---|-------|-------|-------|-------|-------|-------|-------|----------|
| cds.Camellia_sinensis.comp2068_1_c0_seq1_m.43982 | PREDICTED: NAD(P)H-quinone oxidoreductase subunit S, chloroplastic isoform X1 [Theobroma cacao] | 18.151 | 54.107 | 45.5 | 7 | 14 | 7 | 0.991 | 0.994 | 1.016 | 1.025 | 1.028 | 1.002 | 1.018 | 1.89E-01 |
| cds.Camellia_sinensis.comp2068_5_c0_seq2_m.34273 | PREDICTED: sec-independent protein translocase TATB, chloroplastic isoform X1 [Vitis vinifera]  | 29.162 | 45.476 | 30.1 | 7 | 11 | 7 | 0.995 | 0.999 | 0.98  | 0.975 | 1.019 | 0.98  | 1     | 9.92E-01 |
| cds.Camellia_sinensis.comp2068_6_c0_seq1_m.38674 | PREDICTED: acyl carrier protein 1, chloroplastic [Vitis vinifera]                               | 16.625 | 4.9406 | 9.7  | 1 | 4  | 1 | 1.018 | 0.948 | 1.063 | 0.946 | 1.057 | 1.014 | 0.996 | 9.37E-01 |

|                                                  |                                                                            |        |        |      |    |    |    |       |       |       |       |       |       |       |          |
|--------------------------------------------------|----------------------------------------------------------------------------|--------|--------|------|----|----|----|-------|-------|-------|-------|-------|-------|-------|----------|
|                                                  | PREDICT<br>ED:<br>flowering<br>locus K                                     |        |        |      |    |    |    |       |       |       |       |       |       |       |          |
| cds.Camellia_sinensis.comp2068_7_c0_seq2_m.46943 | homology domain-like isoform X1<br>[Nicotiana tabacum]                     | 20.68  | 9.5695 | 10.4 | 2  | 3  | 2  | 0.997 | 1.03  | 1.043 | 0.991 | 0.952 | 0.991 | 0.956 | 7.53E-02 |
|                                                  | PREDICT<br>ED:<br>peptidyl-prolyl cis-trans isomerase, chloroplastic       |        |        |      |    |    |    |       |       |       |       |       |       |       |          |
| cds.Camellia_sinensis.comp2069_0_c0_seq2_m.20996 | [Ziziphus jujuba]                                                          | 48.218 | 223.3  | 44.1 | 17 | 71 | 17 | 0.983 | 0.988 | 1.002 | 1.016 | 1.031 | 1.014 | 1.03  | 1.98E-02 |
|                                                  | PREDICT<br>ED: 2,3-bisphosphoglycerate-independent phosphoglycerate mutase |        |        |      |    |    |    |       |       |       |       |       |       |       |          |
| cds.Camellia_sinensis.comp2069_3_c0_seq1_m.16158 | [Sesamum indicum]                                                          | 60.685 | 138.69 | 37.9 | 23 | 64 | 23 | 1.025 | 1.009 | 1.013 | 0.983 | 1.003 | 0.979 | 0.973 | 3.67E-02 |
|                                                  | PREDICT<br>ED:<br>transmembrane protein 214                                |        |        |      |    |    |    |       |       |       |       |       |       |       |          |
| cds.Camellia_sinensis.comp2069_6_c0_seq1_m.14529 | [Nelumbo nucifera]                                                         | 67.561 | 10.572 | 9.6  | 5  | 5  | 5  | 1.08  | 1.093 | 1.085 | 0.896 | 0.913 | 0.911 | 0.835 | 1.63E-05 |

|                                                   |                                                                                                                                                                                   |        |        |      |   |   |   |       |       |       |       |       |       |       |          |
|---------------------------------------------------|-----------------------------------------------------------------------------------------------------------------------------------------------------------------------------------|--------|--------|------|---|---|---|-------|-------|-------|-------|-------|-------|-------|----------|
| cds.Camellia_sinensis.comp2069_7_c0_seq1_m.39788  | transmembrane protein, putative [Medicago truncatula] PREDICT ED: universal stress protein PHOS32 [Theobroma cacao]                                                               | 19.409 | 6.1872 | 9.2  | 2 | 2 | 2 | 0.839 | 0.926 | 0.893 | 1.129 | 1.139 | 1.127 | 1.277 | 1.37E-02 |
| cds.Camellia_sinensis.comp2069_8_c0_seq1_m.44790  | alpha/beta fold hydrolase [Medicago truncatula] PREDICT ED: vinorine synthase-like [Nicotiana tabacum] PREDICT ED: ABC transporter I family member 20 isoform X1 [Vitis vinifera] | 17.911 | 29.132 | 34.8 | 6 | 7 | 5 | 1.01  | 0.986 | 0.989 | 1.052 | 0.941 | 1.036 | 1.015 | 7.25E-01 |
| cds.Camellia_sinensis.comp2069_9_c0_seq1_m.26825  | alpha/beta fold hydrolase [Medicago truncatula] PREDICT ED: vinorine synthase-like [Nicotiana tabacum] PREDICT ED: ABC transporter I family member 20 isoform X1 [Vitis vinifera] | 43.135 | 2.959  | 7.6  | 2 | 2 | 2 | 1.096 | 0.949 | 1.053 | 0.949 | 1.071 | 0.878 | 0.935 | 3.97E-01 |
| cds.Camellia_sinensis.comp2070_13_c0_seq1_m.50709 | alpha/beta fold hydrolase [Medicago truncatula] PREDICT ED: vinorine synthase-like [Nicotiana tabacum] PREDICT ED: ABC transporter I family member 20 isoform X1 [Vitis vinifera] | 20.017 | 52.278 | 26.2 | 4 | 8 | 4 | 1.1   | 1.1   | 1.152 | 0.873 | 0.92  | 0.846 | 0.787 | 1.16E-03 |
| cds.Camellia_sinensis.comp2070_1_c0_seq1_m.31979  | alpha/beta fold hydrolase [Medicago truncatula] PREDICT ED: vinorine synthase-like [Nicotiana tabacum] PREDICT ED: ABC transporter I family member 20 isoform X1 [Vitis vinifera] | 36.665 | 18.931 | 8.5  | 2 | 4 | 2 | 0.979 | 0.979 | 1.054 | 0.977 | 1.03  | 0.964 | 0.986 | 6.93E-01 |



|                       |                                                                             |        |        |      |    |     |    |       |       |       |       |       |       |       |          |
|-----------------------|-----------------------------------------------------------------------------|--------|--------|------|----|-----|----|-------|-------|-------|-------|-------|-------|-------|----------|
| cds.Camellia_sinensis | heat shock cognate 70 kDa protein 2 [Gossypium hirsutum]                    | 71.179 | 323.31 | 54.3 | 36 | 156 | 11 | 1.051 | 1.029 | 1.008 | 0.973 | 0.973 | 0.965 | 0.943 | 8.90E-03 |
| cds.Camellia_sinensis | cyclin delta-3, putative [Medicago truncatula]                              | 38.31  | 7.057  | 12.5 | 5  | 6   | 5  | 0.967 | 1.003 | 1.044 | 1.008 | 0.945 | 1.002 | 0.98  | 5.50E-01 |
| cds.Camellia_sinensis | ED: UBPI-associated protein 2C [Nelumbo nucifera]                           | 36.101 | 49.378 | 19.4 | 7  | 11  | 6  | 1.001 | 0.963 | 1.023 | 0.975 | 1.012 | 1.023 | 1.008 | 7.51E-01 |
| cds.Camellia_sinensis | probable plastid-lipid-associated protein 12, chloroplastic [Juglans regia] | 48.665 | 76.647 | 27.5 | 11 | 19  | 11 | 1.03  | 0.998 | 1.054 | 0.947 | 0.992 | 0.997 | 0.953 | 1.00E-01 |
| cds.Camellia_sinensis | ED: 40S ribosomal protein S10-1-like [Gossypium hirsutum]                   | 11.919 | 46.608 | 55.6 | 7  | 22  | 6  | 0.886 | 0.913 | 0.95  | 1.106 | 1.09  | 1.054 | 1.182 | 2.48E-03 |

|                                |                                                                           |        |        |      |    |    |    |       |       |       |       |       |       |       |          |
|--------------------------------|---------------------------------------------------------------------------|--------|--------|------|----|----|----|-------|-------|-------|-------|-------|-------|-------|----------|
| cds.Camellia_sinensis.comp2074 | PREDICT ED: protein bicaudal C homolog 1-like [Nicotiana attenuata]       | 15.038 | 3.3975 | 8.7  | 1  | 1  | 1  |       |       |       |       |       |       |       |          |
| cds.Camellia_sinensis.comp2075 | PREDICT ED: probable small nuclear ribonucleo protein G [Ziziphus jujuba] | 12.136 | 7.049  | 35.8 | 4  | 6  | 4  | 0.985 | 0.941 | 0.946 | 1.063 | 1.01  | 1.035 | 1.082 | 1.87E-02 |
| cds.Camellia_sinensis.comp2075 | PREDICT ED: SUN domain-containing protein 3-like [Jatropha curcas]        | 50.359 | 40.23  | 29.8 | 12 | 15 | 12 | 1.02  | 1.037 | 1.012 | 0.962 | 1.013 | 0.975 | 0.961 | 8.04E-02 |
| cds.Camellia_sinensis.comp2075 | PREDICT ED: nicotinamide 2-like [Nelumbo nucifera]                        | 22.435 | 2.518  | 12.5 | 3  | 3  | 3  | 0.955 | 1.007 | 0.97  | 0.983 | 1.066 | 1.035 | 1.052 | 1.52E-01 |

|                                                 |                                                                                              |        |        |      |   |   |   |       |       |       |       |       |       |       |          |
|-------------------------------------------------|----------------------------------------------------------------------------------------------|--------|--------|------|---|---|---|-------|-------|-------|-------|-------|-------|-------|----------|
| cds.Camellia_sinensis.comp20763_c0_seq2_m.44518 | PREDICTED: DNA-directed RNA polymerases II, IV and V subunit 11 isoform X1 [Theobroma cacao] | 13.569 | 15.954 | 34.5 | 4 | 7 | 4 | 0.967 | 0.969 | 0.937 | 1.042 | 1.017 | 1.031 | 1.076 | 4.90E-03 |
| cds.Camellia_sinensis.comp20766_c0_seq1_m.23754 | PREDICTED: probable sugar phosphate/translocator At5g25400 [Nelumbo]                         | 38.615 | 1.3266 | 3.2  | 1 | 1 | 1 |       |       |       |       |       |       |       |          |
| cds.Camellia_sinensis.comp20768_c0_seq1_m.35796 | PREDICTED: anthranilate synthase beta subunit 1, chloroplastic-like [Nicotiana tabacum]      | 33.21  | 14.393 | 14   | 4 | 8 | 4 | 1.008 | 0.992 | 1.02  | 0.995 | 0.974 | 0.968 | 0.973 | 7.41E-02 |
| cds.Camellia_sinensis.comp20770_c0_seq1_m.3876  | PREDICTED: elongation factor Ts (DUF810) [Arabidopsis thaliana]                              | 89.098 | 4.6025 | 2.1  | 2 | 2 | 2 | 1.042 | 1.075 | 1.025 | 0.907 | 0.979 | 0.963 | 0.907 | 2.22E-02 |



|                                                  |                                                                            |        |        |      |   |    |   |       |       |       |       |       |       |       |          |
|--------------------------------------------------|----------------------------------------------------------------------------|--------|--------|------|---|----|---|-------|-------|-------|-------|-------|-------|-------|----------|
| cds.Camellia_sinensis.comp2077_2_c0_seq1_m.32739 | PREDICT ED: vestitone reductase-like [Vitis vinifera]                      | 36.6   | 6.3923 | 3.9  | 1 | 1  | 1 | 0.896 | 0.897 | 0.851 | 1.139 | 1.095 | 1.167 | 1.286 | 5.82E-04 |
| cds.Camellia_sinensis.comp2077_2_c0_seq2_m.32953 | PREDICT ED: vestitone reductase-like [Vitis vinifera]                      | 36.68  | 11.953 | 6.6  | 2 | 2  | 2 |       |       |       |       |       |       |       |          |
| cds.Camellia_sinensis.comp2077_4_c0_seq1_m.26562 | PREDICT ED: 60S acidic ribosomal protein P0 [Vitis vinifera]               | 34.131 | 19.249 | 18.5 | 5 | 12 | 5 | 1.039 | 1.04  | 1.026 | 0.94  | 0.969 | 0.99  | 0.934 | 1.17E-02 |
| cds.Camellia_sinensis.comp2077_7_c0_seq1_m.37508 | PREDICT ED: RNA-binding protein 7 [Vitis vinifera]                         | 22.001 | 1.4441 | 5.6  | 1 | 1  | 1 |       |       |       |       |       |       |       |          |
| cds.Camellia_sinensis.comp2078_0_c0_seq1_m.41262 | PREDICT ED: pre-mRNA cleavage factor Im 25 kDa subunit 2 [Citrus sinensis] | 22.727 | 11.722 | 24.1 | 4 | 5  | 4 | 0.952 | 0.959 | 1.122 | 1.16  | 0.883 | 0.943 | 0.985 | 8.52E-01 |

|                                                  |                                                                                                                                     |        |        |      |    |    |    |       |       |       |       |       |       |       |          |
|--------------------------------------------------|-------------------------------------------------------------------------------------------------------------------------------------|--------|--------|------|----|----|----|-------|-------|-------|-------|-------|-------|-------|----------|
|                                                  | PREDICT<br>ED:<br>peptidyl-<br>prolyl cis-<br>trans<br>isomerase<br>Pin1<br>isoform<br>X2<br>[Juglans<br>regia]                     |        |        |      |    |    |    |       |       |       |       |       |       |       |          |
| cds.Camellia_sinensis.comp2078_3_c0_seq1_m.41641 |                                                                                                                                     | 12.926 | 20.673 | 30.5 | 4  | 7  | 4  | 0.99  | 1.041 | 0.923 | 1.033 | 0.978 | 1.037 | 1.032 | 4.63E-01 |
|                                                  | PREDICT<br>ED:<br>magnesium-<br>m-<br>chelata-<br>subunit<br>ChlI,<br>chloroplast<br>ic-like<br>isoform<br>X3<br>[Juglans<br>regia] |        |        |      |    |    |    |       |       |       |       |       |       |       |          |
| cds.Camellia_sinensis.comp2078_6_c0_seq1_m.22268 |                                                                                                                                     | 46.468 | 165.09 | 42.9 | 17 | 35 | 17 | 1.005 | 1.003 | 1.01  | 0.991 | 0.983 | 0.99  | 0.982 | 5.32E-03 |
|                                                  | PREDICT<br>ED:<br>probable<br>zinc<br>metallopro-<br>tease<br>EGY2,<br>chloroplast<br>ic isoform<br>X2<br>[Nelumbo<br>nucifera]     |        |        |      |    |    |    |       |       |       |       |       |       |       |          |
| cds.Camellia_sinensis.comp2079_1_c0_seq1_m.16520 |                                                                                                                                     | 56.973 | 9.562  | 7.9  | 4  | 6  | 4  | 0.958 | 1.041 | 1.032 | 0.932 | 0.991 | 1.01  | 0.968 | 4.12E-01 |

|                                                  |                                                                                                        |        |        |      |    |    |    |       |       |       |       |       |       |       |          |
|--------------------------------------------------|--------------------------------------------------------------------------------------------------------|--------|--------|------|----|----|----|-------|-------|-------|-------|-------|-------|-------|----------|
| cds.Camellia_sinensis.comp2080_3_c0_seq1_m.21237 | PREDICT<br>ED:<br>branched-chain-amino-acid aminotransferase 3, chloroplastic<br>[Erythranthe guttata] | 45.781 | 56.399 | 29   | 13 | 19 | 13 | 1.012 | 1.005 | 1.02  | 0.959 | 0.98  | 0.986 | 0.963 | 1.64E-02 |
| cds.Camellia_sinensis.comp2080_7_c0_seq1_m.40489 | PREDICT<br>ED:<br>elongation factor P-like<br>[Gossypium hirsutum]                                     | 24.476 | 58.747 | 44.5 | 9  | 17 | 9  | 1.041 | 1.06  | 1.052 | 0.946 | 0.944 | 0.941 | 0.898 | 3.96E-05 |
| cds.Camellia_sinensis.comp2081_5_c0_seq1_m.23773 | PREDICT<br>ED:<br>cysteine synthase<br>[Vitis vinifera]                                                | 41.013 | 6.1021 | 12.8 | 5  | 7  | 4  | 0.961 | 0.994 | 1.006 | 1.058 | 1.026 | 0.998 | 1.041 | 1.40E-01 |
| cds.Camellia_sinensis.comp2082_0_c0_seq1_m.38571 | PREDICT<br>ED:<br>glutathione S-transferase F9-like<br>[Jatropha curcas]                               | 25.679 | 30.602 | 29   | 7  | 21 | 7  | 0.998 | 0.971 | 0.962 | 1.012 | 1.031 | 1.003 | 1.039 | 4.80E-02 |

|                                                  |                                                                         |        |        |      |   |    |   |       |       |       |       |       |       |       |          |
|--------------------------------------------------|-------------------------------------------------------------------------|--------|--------|------|---|----|---|-------|-------|-------|-------|-------|-------|-------|----------|
|                                                  | PREDICT                                                                 |        |        |      |   |    |   |       |       |       |       |       |       |       |          |
|                                                  | ED:                                                                     |        |        |      |   |    |   |       |       |       |       |       |       |       |          |
| cds.Camellia_sinensis.comp2083_2_c0_seq1_m.31547 | eukaryotic translation initiation factor 3 subunit G-B [Vitis vinifera] | 32.579 | 43.56  | 30.7 | 9 | 13 | 7 | 0.978 | 0.999 | 0.964 | 1.036 | 1.027 | 1.017 | 1.047 | 1.66E-02 |
|                                                  | PREDICT                                                                 |        |        |      |   |    |   |       |       |       |       |       |       |       |          |
|                                                  | ED:                                                                     |        |        |      |   |    |   |       |       |       |       |       |       |       |          |
|                                                  | uncharacterized PKHD-type hydroxylase                                   |        |        |      |   |    |   |       |       |       |       |       |       |       |          |
| cds.Camellia_sinensis.comp2083_9_c0_seq2_m.26371 | At1g22950-like [Nelumbonucifera]                                        | 29.493 | 3.2205 | 4.3  | 1 | 1  | 1 |       |       |       |       |       |       |       |          |
|                                                  | PREDICT                                                                 |        |        |      |   |    |   |       |       |       |       |       |       |       |          |
|                                                  | ED:                                                                     |        |        |      |   |    |   |       |       |       |       |       |       |       |          |
| cds.Camellia_sinensis.comp2084_1_c0_seq1_m.9399  | subtilisin-like protease [Nicotiana sylvestris]                         | 82.946 | 2.3826 | 4.1  | 3 | 3  | 3 | 0.969 | 0.937 | 1.029 | 1.065 | 1.052 | 0.971 | 1.052 | 2.72E-01 |
|                                                  | PREDICT                                                                 |        |        |      |   |    |   |       |       |       |       |       |       |       |          |
|                                                  | ED: AT-hook motif nuclear-localized protein 9 [Ricinus communis]        |        |        |      |   |    |   |       |       |       |       |       |       |       |          |
| cds.Camellia_sinensis.comp2084_2_c0_seq1_m.13440 |                                                                         | 34.521 | 11.057 | 11.2 | 3 | 4  | 3 | 1.034 | 0.939 | 0.982 | 0.979 | 0.953 | 1.043 | 1.007 | 8.69E-01 |



|                                                  |                                                                           |        |        |      |    |    |    |       |       |       |       |       |       |       |          |
|--------------------------------------------------|---------------------------------------------------------------------------|--------|--------|------|----|----|----|-------|-------|-------|-------|-------|-------|-------|----------|
| cds.Camellia_sinensis.comp2085_8_c0_seq1_m.19553 | PREDICTED:<br>ethanolamine-phosphate cytidyltransferase [Sesamum indicum] | 46.774 | 29.793 | 8.4  | 4  | 5  | 4  | 1.009 | 1.004 | 1.006 | 0.975 | 0.972 | 1.003 | 0.977 | 1.48E-01 |
| cds.Camellia_sinensis.comp2086_1_c0_seq1_m.45654 | transmembrane protein [Arabidopsis thaliana]                              | 12.461 | 33.199 | 18.9 | 2  | 7  | 2  | 0.92  | 0.983 | 1.03  | 1.061 | 0.931 | 1.075 | 1.046 | 4.82E-01 |
| cds.Camellia_sinensis.comp2086_2_c0_seq1_m.10575 | PREDICTED:<br>dipeptidyl-peptidase 5 [Vitis vinifera]                     | 80.797 | 105.65 | 32.5 | 23 | 42 | 23 | 0.982 | 0.973 | 1.019 | 1.038 | 1.021 | 0.988 | 1.025 | 2.97E-01 |
| cds.Camellia_sinensis.comp2086_4_c0_seq1_m.32920 | Caffeoyl-CoA O-methyltransferase [Morus notabilis]                        | 27.553 | 18.841 | 33.1 | 7  | 10 | 7  | 1.168 | 1.096 | 1.118 | 0.852 | 0.881 | 0.893 | 0.776 | 4.19E-04 |
| cds.Camellia_sinensis.comp2086_5_c0_seq1_m.20015 | PREDICTED:<br>switch-associated protein 70 [Vitis vinifera]               | 52.855 | 70.111 | 38   | 15 | 24 | 15 | 0.971 | 0.966 | 0.992 | 1.025 | 1.018 | 1.021 | 1.046 | 5.72E-03 |

|                                                  |                                                                                         |        |        |      |   |    |   |       |       |       |       |       |       |       |          |
|--------------------------------------------------|-----------------------------------------------------------------------------------------|--------|--------|------|---|----|---|-------|-------|-------|-------|-------|-------|-------|----------|
| cds.Camellia_sinensis.comp2086_7_c0_seq1_m.15016 | Protein kinase capable of phosphorylating tyrosine family protein [Populus trichocarpa] | 44.664 | 1.2566 | 4.5  | 2 | 2  | 2 | 1.005 | 0.975 | 1.074 | 1.03  | 0.894 | 1.028 | 0.967 | 5.55E-01 |
| cds.Camellia_sinensis.comp2087_3_c0_seq1_m.13915 | PREDICTED: synaptotagmin-2-like [Nelumbo nucifera]                                      | 61.594 | 5.0706 | 12.3 | 8 | 13 | 3 | 0.952 | 0.99  | 0.94  | 1.038 | 1.057 | 1.047 | 1.09  | 6.24E-03 |
| cds.Camellia_sinensis.comp2087_4_c0_seq1_m.44718 | dihydroorotate dehydrogenase, putative [Medicago truncatula]                            | 15.902 | 4.0248 | 6.9  | 1 | 3  | 1 | 1.057 | 0.967 | 0.918 | 1.003 | 1.082 | 0.98  | 1.042 | 4.58E-01 |
| cds.Camellia_sinensis.comp2087_7_c0_seq1_m.38225 | PREDICTED: calcineurin subunit B-like [Daucus carota subsp. sativus]                    | 19.878 | 9.9636 | 26.3 | 4 | 4  | 3 | 1.045 | 1.032 | 1.124 | 1.012 | 0.92  | 0.863 | 0.873 | 6.21E-02 |

|                                                  |                                                                                            |        |        |      |    |    |    |       |       |       |       |       |       |       |          |
|--------------------------------------------------|--------------------------------------------------------------------------------------------|--------|--------|------|----|----|----|-------|-------|-------|-------|-------|-------|-------|----------|
| cds.Camellia_sinensis.comp2088_1_c0_seq2_m.37337 | PREDICT<br>ED:<br>abscisic acid receptor<br>PYL8<br>[Vitis vinifera]                       | 19.935 | 1.6165 | 6.2  | 1  | 1  | 1  |       |       |       |       |       |       |       |          |
| cds.Camellia_sinensis.comp2088_2_c0_seq1_m.11112 | PREDICT<br>ED:<br>protein TIC 62, chloroplast<br>ic<br>[Sesamum indicum]                   | 31.947 | 55.397 | 52.8 | 10 | 37 | 6  | 1.119 | 1.059 | 1.04  | 0.916 | 0.909 | 0.924 | 0.854 | 2.22E-03 |
| cds.Camellia_sinensis.comp2088_2_c0_seq2_m.17004 | PREDICT<br>ED:<br>protein TIC 62, chloroplast<br>ic<br>[Populus euphratica]                | 39.27  | 323.31 | 59.1 | 19 | 67 | 15 | 1.066 | 1.075 | 1.059 | 0.895 | 0.927 | 0.947 | 0.865 | 1.04E-03 |
| cds.Camellia_sinensis.comp2088_3_c0_seq1_m.38158 | PREDICT<br>ED:<br>inosine triphosphate<br>pyrophosphatase<br>isoform X2<br>[Juglans regia] | 22.643 | 9.507  | 17   | 3  | 3  | 3  | 1.003 | 0.992 | 0.928 | 1.057 | 0.965 | 1.068 | 1.057 | 2.44E-01 |
| cds.Camellia_sinensis.comp2089_4_c0_seq2_m.33751 | Putative syntaxin-131<br>[Morus notabilis]                                                 | 15.86  | 3.1934 | 17.2 | 3  | 3  | 3  | 1.115 | 1.107 | 1.123 | 0.877 | 0.874 | 0.891 | 0.79  | 2.64E-06 |



|                                                  |                                                                                                                   |        |        |      |    |    |    |       |       |       |       |       |       |       |          |
|--------------------------------------------------|-------------------------------------------------------------------------------------------------------------------|--------|--------|------|----|----|----|-------|-------|-------|-------|-------|-------|-------|----------|
| cds.Camellia_sinensis.comp2089_4_c0_seq2_m.33752 | PREDICTED: syntaxin-132-like [Prunus mume]                                                                        | 14.651 | 24.676 | 10.3 | 1  | 2  | 1  | 1.043 | 0.968 | 1.105 | 0.948 | 0.993 | 0.94  | 0.925 | 1.39E-01 |
| cds.Camellia_sinensis.comp2089_6_c0_seq1_m.33618 | PREDICTED: biotin carboxyl carrier protein of acetyl-CoA carboxylase 1, chloroplastic-like [Nicotiana sylvestris] | 34.621 | 24.88  | 10.5 | 4  | 5  | 4  | 0.996 | 1.063 | 1.021 | 0.935 | 0.951 | 0.96  | 0.924 | 1.84E-02 |
| cds.Camellia_sinensis.comp2089_7_c0_seq2_m.55053 | oxidoreductase family protein [Populus trichocarpa]                                                               | 14.805 | 1.6042 | 5.8  | 1  | 1  | 1  | 0.927 | 1.014 | 0.908 | 1.086 | 1.068 | 1.028 | 1.117 | 4.13E-02 |
| cds.Camellia_sinensis.comp2090_1_c0_seq1_m.28740 | 40S ribosomal protein S2-4 [Medicago truncatula]                                                                  | 30.281 | 128.94 | 48   | 16 | 33 | 10 | 1.096 | 1.067 | 1.087 | 0.927 | 0.913 | 0.865 | 0.832 | 1.20E-03 |

|                                                  |                                                                                                 |        |        |      |    |    |    |       |       |       |       |       |       |       |          |
|--------------------------------------------------|-------------------------------------------------------------------------------------------------|--------|--------|------|----|----|----|-------|-------|-------|-------|-------|-------|-------|----------|
| cds.Camellia_sinensis.comp2090_2_c0_seq1_m.42673 | PREDICTED: ATP-dependent Clp protease adapter protein CLPS1, chloroplastic-like [Juglans regia] | 18.629 | 2.1974 | 11.1 | 3  | 3  | 3  | 0.969 | 1.039 | 1.042 | 0.956 | 1.034 | 0.969 | 0.97  | 4.22E-01 |
| cds.Camellia_sinensis.comp2090_4_c0_seq1_m.35646 | PREDICTED: psbP-like protein 1, chloroplastic [Sesamum indicum]                                 | 28.08  | 75.084 | 29.6 | 9  | 20 | 9  | 1.013 | 0.993 | 0.989 | 0.968 | 1.023 | 1.007 | 1.001 | 9.67E-01 |
| cds.Camellia_sinensis.comp2091_4_c0_seq1_m.43257 | PREDICTED: dirigent protein 5 [Eucalyptus grandis]                                              | 26.43  | 111.95 | 29.8 | 5  | 22 | 5  | 1.03  | 1.106 | 1.1   | 0.926 | 0.904 | 0.89  | 0.841 | 2.50E-03 |
| cds.Camellia_sinensis.comp2092_0_c0_seq1_m.53904 | PREDICTED: probable inactive receptor kinase RLK902 [Nicotiana attenuata]                       | 16.646 | 11.416 | 28.4 | 3  | 4  | 3  | 0.98  | 1.024 | 1.005 | 1.083 | 0.909 | 1.012 | 0.998 | 9.42E-01 |
| cds.Camellia_sinensis.comp2092_1_c0_seq1_m.19574 | PREDICTED: ruvB-like 2 [Sesamum indicum]                                                        | 51.623 | 74.693 | 36.8 | 16 | 24 | 16 | 0.941 | 0.95  | 0.995 | 1.042 | 1.035 | 1.058 | 1.086 | 1.08E-02 |

|                                                  |                                                                                                                       |        |        |      |    |    |    |       |       |       |       |       |       |       |          |
|--------------------------------------------------|-----------------------------------------------------------------------------------------------------------------------|--------|--------|------|----|----|----|-------|-------|-------|-------|-------|-------|-------|----------|
| cds.Camellia_sinensis.comp2092_3_c0_seq1_m.1885  | ketose-bisphosphate aldolase class-II family protein [Arabidopsis                                                     | 148.61 | 87.697 | 18.4 | 23 | 29 | 23 | 0.979 | 0.959 | 0.941 | 1.032 | 1.055 | 1.035 | 1.084 | 3.72E-03 |
| cds.Camellia_sinensis.comp2093_0_c0_seq1_m.34135 | transmembrane protein [Arabidopsis thaliana] YbaK/prolyl-tRNA synthetase-related family protein [Populus trichocarpa] | 19.655 | 16.86  | 12.8 | 1  | 2  | 1  | 1.055 | 0.944 | 0.952 | 0.939 | 1.03  | 1.081 | 1.034 | 5.83E-01 |
| cds.Camellia_sinensis.comp2093_3_c0_seq1_m.35813 | synthetase-related family protein [Populus trichocarpa]                                                               | 26.48  | 8.7232 | 9.7  | 2  | 3  | 2  | 0.897 | 0.951 | 1.049 | 1.101 | 1.034 | 1.002 | 1.083 | 2.04E-01 |
| cds.Camellia_sinensis.comp2093_5_c0_seq2_m.43476 | PREDICTED: KH domain-containing protein At4g18375-like [Sesamum indicum]                                              | 24.413 | 23.783 | 14.1 | 3  | 3  | 3  | 0.985 | 1.067 | 1.078 | 1.027 | 0.963 | 0.888 | 0.919 | 1.70E-01 |

|                                                  |                                                                           |        |        |      |   |    |   |       |       |       |       |       |       |       |          |
|--------------------------------------------------|---------------------------------------------------------------------------|--------|--------|------|---|----|---|-------|-------|-------|-------|-------|-------|-------|----------|
|                                                  | PREDICT                                                                   |        |        |      |   |    |   |       |       |       |       |       |       |       |          |
|                                                  | ED:                                                                       |        |        |      |   |    |   |       |       |       |       |       |       |       |          |
| cds.Camellia_sinensis.comp2093_6_c0_seq1_m.31963 | tropinone reductase homolog isoform X1<br>[Sesamum indicum]               | 33.917 | 3.5372 | 9    | 3 | 3  | 2 | 1.037 | 1.033 | 1.008 | 0.952 | 0.984 | 0.985 | 0.949 | 2.14E-02 |
|                                                  | PREDICT                                                                   |        |        |      |   |    |   |       |       |       |       |       |       |       |          |
|                                                  | ED:                                                                       |        |        |      |   |    |   |       |       |       |       |       |       |       |          |
| cds.Camellia_sinensis.comp2093_8_c0_seq1_m.40912 | translation ally-controlled tumor protein homolog<br>[Prunus mume]        | 25.486 | 28.697 | 29.1 | 8 | 20 | 5 | 1.045 | 0.957 | 0.989 | 0.965 | 1.04  | 1.016 | 1.01  | 7.79E-01 |
|                                                  | PREDICT                                                                   |        |        |      |   |    |   |       |       |       |       |       |       |       |          |
|                                                  | ED:                                                                       |        |        |      |   |    |   |       |       |       |       |       |       |       |          |
| cds.Camellia_sinensis.comp2093_9_c0_seq1_m.24698 | protein<br>LOW PSII ACCUMULATION 3,<br>chloroplastic<br>[Ziziphus jujuba] | 43.645 | 34.669 | 23.3 | 9 | 12 | 9 | 1.095 | 1.059 | 1.034 | 0.941 | 0.95  | 0.962 | 0.895 | 3.40E-03 |
|                                                  | PREDICT                                                                   |        |        |      |   |    |   |       |       |       |       |       |       |       |          |
|                                                  | ED:                                                                       |        |        |      |   |    |   |       |       |       |       |       |       |       |          |
| cds.Camellia_sinensis.comp2094_4_c0_seq1_m.33041 | peroxidase 47<br>[Sesamum indicum]                                        | 34.936 | 131.45 | 34.8 | 9 | 10 | 9 | 0.928 | 0.929 | 0.88  | 1.082 | 1.109 | 1.101 | 1.203 | 6.63E-04 |

|                                                  |                                                                        |        |        |      |    |    |    |       |       |       |       |       |       |       |          |
|--------------------------------------------------|------------------------------------------------------------------------|--------|--------|------|----|----|----|-------|-------|-------|-------|-------|-------|-------|----------|
| cds.Camellia_sinensis.comp2095_0_c0_seq1_m.28165 | nuclear protein<br>[Arabidopsis thaliana]<br>PREDICTED:                | 33.521 | 87.907 | 52.9 | 14 | 27 | 14 | 1.009 | 1.02  | 1.033 | 0.972 | 0.997 | 0.976 | 0.962 | 2.00E-02 |
| cds.Camellia_sinensis.comp2095_1_c0_seq1_m.28527 | oligouridylation-binding protein 1-like<br>[Prunus]<br>PREDICTED:      | 39.588 | 22.353 | 22.7 | 8  | 12 | 7  | 0.991 | 0.971 | 0.971 | 1.005 | 0.993 | 1.015 | 1.027 | 4.43E-02 |
| cds.Camellia_sinensis.comp2095_8_c0_seq1_m.33512 | heterogeneous nuclear ribonucleoprotein H2 isoform X1 [Vitis vinifera] | 29.599 | 16.925 | 18.9 | 4  | 6  | 4  |       |       |       |       |       |       |       |          |
| cds.Camellia_sinensis.comp2096_0_c0_seq1_m.41449 | copper ion-binding protein<br>[Medicago truncatula]<br>PREDICTED:      | 12.664 | 3.4564 | 12.8 | 2  | 5  | 2  | 1.04  | 1.013 | 1.022 | 0.957 | 0.979 | 0.973 | 0.946 | 5.72E-03 |
| cds.Camellia_sinensis.comp2096_2_c0_seq1_m.8182  | serine/threonine-protein kinase SAPK3<br>[Eucalyptus grandis]          | 38.534 | 46.405 | 21.6 | 8  | 10 | 5  | 0.998 | 1.109 | 1.006 | 0.868 | 0.98  | 0.947 | 0.898 | 9.50E-02 |



|                                                  |                                                                                                                               |        |        |      |   |    |   |       |       |       |       |       |       |       |          |
|--------------------------------------------------|-------------------------------------------------------------------------------------------------------------------------------|--------|--------|------|---|----|---|-------|-------|-------|-------|-------|-------|-------|----------|
|                                                  | PREDICT<br>ED: U1<br>small                                                                                                    |        |        |      |   |    |   |       |       |       |       |       |       |       |          |
| cds.Camellia_sinensis.comp2098_2_c0_seq1_m.38132 | nuclear ribonucleo-<br>protein A-<br>like<br>isoform<br>X1<br>[Sesamum<br>indicum]                                            | 28.725 | 6.9912 | 15.3 | 3 | 3  | 3 | 0.907 | 1.004 | 0.997 | 1.149 | 1.015 | 1.033 | 1.099 | 1.37E-01 |
| cds.Camellia_sinensis.comp2099_2_c0_seq1_m.20718 | PREDICT<br>ED: WD-<br>40 repeat-<br>containing<br>protein<br>MSI4-like<br>[Juglans<br>regia]                                  | 51.128 | 15.053 | 12.2 | 4 | 7  | 3 | 1.044 | 1.008 | 0.972 | 1.018 | 0.972 | 0.99  | 0.985 | 5.90E-01 |
| cds.Camellia_sinensis.comp2100_0_c0_seq1_m.31884 | PREDICT<br>ED: sufE-<br>like<br>protein 1,<br>chloroplast<br>ic/mitocho-<br>ndrial<br>[Daucus<br>carota<br>subsp.<br>sativus] | 39.422 | 26.638 | 19.6 | 5 | 6  | 5 | 0.941 | 1.003 | 1.067 | 1.033 | 1.042 | 0.94  | 1.001 | 9.76E-01 |
| cds.Camellia_sinensis.comp2100_5_c0_seq4_m.24618 | PREDICT<br>ED:<br>protein<br>phosphatas<br>e 2C 57<br>[Prunus<br>mume]                                                        | 43.893 | 95.916 | 21.8 | 9 | 14 | 9 | 1.016 | 1.016 | 1.05  | 0.983 | 0.972 | 0.976 | 0.951 | 1.19E-02 |

|                                                  |                                                                                                                |        |        |      |    |    |    |       |       |       |       |       |       |       |          |
|--------------------------------------------------|----------------------------------------------------------------------------------------------------------------|--------|--------|------|----|----|----|-------|-------|-------|-------|-------|-------|-------|----------|
| cds.Camellia_sinensis.comp2100_6_c0_seq1_m.35903 | PREDICT<br>ED:<br>tetrapyrrole-binding protein, chloroplastic [Juglans regia]                                  | 30.146 | 2.4352 | 4.5  | 1  | 2  | 1  | 1.009 | 1.032 | 1.001 | 0.944 | 1.007 | 1.009 | 0.973 | 3.07E-01 |
| cds.Camellia_sinensis.comp2100_6_c1_seq1_m.26070 | tyrosine phosphatase, putative [Medicago truncatula]                                                           | 41.261 | 246.04 | 51   | 20 | 64 | 20 | 1.127 | 1.101 | 1.119 | 0.865 | 0.884 | 0.876 | 0.784 | 1.65E-05 |
| cds.Camellia_sinensis.comp2100_9_c0_seq1_m.28964 | PREDICT<br>ED:<br>bifunctional L-3-cyanoalanine synthase/cysteine synthase 1, mitochondrial isoform X2 [Vitis] | 41.896 | 86.35  | 24.1 | 9  | 24 | 8  | 1.013 | 1.023 | 1.016 | 1.015 | 0.943 | 0.978 | 0.962 | 2.09E-01 |
| cds.Camellia_sinensis.comp2101_0_c0_seq1_m.33119 | PREDICT<br>ED: S-formylglutathione hydrolase [Ipomoea nil]                                                     | 32.06  | 129.44 | 37.7 | 9  | 18 | 9  | 0.976 | 0.97  | 0.986 | 1.027 | 1.028 | 1.057 | 1.061 | 4.90E-03 |



|                                                  |                                                                                                    |        |        |      |    |    |    |       |       |       |       |       |       |       |          |
|--------------------------------------------------|----------------------------------------------------------------------------------------------------|--------|--------|------|----|----|----|-------|-------|-------|-------|-------|-------|-------|----------|
|                                                  | PREDICT<br>ED:                                                                                     |        |        |      |    |    |    |       |       |       |       |       |       |       |          |
| cds.Camellia_sinensis.comp2101_6_c0_seq1_m.34450 | translocon-associated protein subunit alpha-like [Juglans regia]                                   | 24.909 | 10.233 | 5.7  | 1  | 2  | 1  | 1.07  | 1.097 | 1.027 | 0.957 | 0.891 | 0.944 | 0.874 | 9.88E-03 |
|                                                  | PREDICT<br>ED: ATP-dependent Clp protease ATP-binding subunit CLPT2, chloroplastic [Juglans regia] |        |        |      |    |    |    |       |       |       |       |       |       |       |          |
| cds.Camellia_sinensis.comp2101_7_c0_seq1_m.40078 | chloroplastic [Juglans regia]                                                                      | 15.194 | 17.81  | 38.4 | 5  | 11 | 4  | 1.07  | 0.946 | 1.021 | 0.98  | 0.99  | 0.966 | 0.967 | 4.23E-01 |
|                                                  | PREDICT<br>ED:                                                                                     |        |        |      |    |    |    |       |       |       |       |       |       |       |          |
| cds.Camellia_sinensis.comp2101_8_c0_seq1_m.6880  | histidine--tRNA ligase, cytoplasmic isoform X1 [Nelumbo nucifera]                                  | 98.124 | 66.042 | 21.7 | 18 | 26 | 18 | 1.005 | 0.988 | 1.002 | 1.002 | 0.998 | 0.973 | 0.993 | 5.22E-01 |
|                                                  | PREDICT<br>ED:                                                                                     |        |        |      |    |    |    |       |       |       |       |       |       |       |          |
| cds.Camellia_sinensis.comp2101_9_c0_seq1_m.29951 | bromodomain-containing protein 4-like [Ziziphus jujuba]                                            | 32.216 | 119.45 | 48.4 | 13 | 28 | 13 | 0.995 | 0.992 | 1.008 | 1.007 | 1.007 | 0.988 | 1.002 | 7.87E-01 |

|                                                  |                                                                                                                |        |        |      |    |    |    |       |       |       |       |       |       |       |          |
|--------------------------------------------------|----------------------------------------------------------------------------------------------------------------|--------|--------|------|----|----|----|-------|-------|-------|-------|-------|-------|-------|----------|
| cds.Camellia_sinensis.comp2102_1_c0_seq2_m.32602 | PREDICT<br>ED: pre-mRNA-splicing factor<br>ISY1 homolog [Beta vulgaris subsp. vulgaris]                        | 35.444 | 3.7839 | 7.9  | 3  | 3  | 3  | 1.017 | 1.092 | 1.047 | 0.983 | 0.948 | 0.912 | 0.901 | 2.51E-02 |
| cds.Camellia_sinensis.comp2102_2_c0_seq1_m.24264 | PREDICT<br>ED: GDSL esterase/lipase APG-like [Capsicum annuum]                                                 | 38.148 | 9.9561 | 12.9 | 4  | 5  | 4  | 1.01  | 1.11  | 1.039 | 0.825 | 1.02  | 0.983 | 0.895 | 1.84E-01 |
| cds.Camellia_sinensis.comp2102_4_c0_seq1_m.14426 | PREDICT<br>ED: eukaryotic peptide chain release factor GTP-binding subunit ERF3A-like isoform X2 [Ipomoea nil] | 52.283 | 32.7   | 24.4 | 11 | 19 | 11 | 0.986 | 0.966 | 0.946 | 1.028 | 1.003 | 1.055 | 1.065 | 2.92E-02 |

|                                                 |                                                                                 |        |        |      |   |    |   |       |       |       |       |       |       |       |          |
|-------------------------------------------------|---------------------------------------------------------------------------------|--------|--------|------|---|----|---|-------|-------|-------|-------|-------|-------|-------|----------|
| cds.Camellia_sinensis.comp21027_c0_seq1_m.39798 | PREDICT<br>ED: 14<br>kDa zinc-binding protein-like<br>[Sesamum indicum]         | 20.492 | 74.708 | 28.3 | 5 | 14 | 5 | 0.976 | 0.98  | 0.985 | 1.02  | 1.022 | 1.018 | 1.04  | 1.61E-04 |
| cds.Camellia_sinensis.comp21030_c0_seq1_m.29788 | PREDICT<br>ED:<br>tropinone reductase homolog<br>[Nicotiana attenuata]          | 24.516 | 62.669 | 25.6 | 5 | 23 | 3 | 0.957 | 1.006 | 0.998 | 1.039 | 1.029 | 1.023 | 1.044 | 5.54E-02 |
| cds.Camellia_sinensis.comp21036_c0_seq1_m.27186 | PREDICT<br>ED: grpE protein homolog, mitochondrial<br>[Sesamum indicum]         | 41.759 | 90.694 | 24   | 9 | 21 | 9 | 1.134 | 1.11  | 1.119 | 0.869 | 0.876 | 0.898 | 0.786 | 3.63E-05 |
| cds.Camellia_sinensis.comp21039_c0_seq1_m.29908 | PREDICT<br>ED: 20<br>kDa chaperonin , chloroplastic-like<br>[Nicotiana tabacum] | 21.783 | 76.983 | 40.9 | 9 | 26 | 9 | 1.053 | 0.985 | 1.001 | 0.979 | 0.994 | 0.993 | 0.976 | 3.12E-01 |

|                                                  |                                                                                     |        |        |      |   |    |   |       |       |       |       |       |       |       |          |
|--------------------------------------------------|-------------------------------------------------------------------------------------|--------|--------|------|---|----|---|-------|-------|-------|-------|-------|-------|-------|----------|
|                                                  | PREDICT<br>ED:                                                                      |        |        |      |   |    |   |       |       |       |       |       |       |       |          |
| cds.Camellia_sinensis.comp2104_2_c0_seq1_m.43112 | ferredoxin-thioredoxin reductase, variable chain<br>[Theobroma cacao]               | 22.79  | 105.78 | 34   | 7 | 18 | 7 | 1.031 | 0.988 | 0.977 | 0.995 | 1.002 | 0.998 | 1     | 9.97E-01 |
|                                                  | PREDICT<br>ED:                                                                      |        |        |      |   |    |   |       |       |       |       |       |       |       |          |
| cds.Camellia_sinensis.comp2104_5_c0_seq1_m.37610 | probable plastid-lipid-associated protein 4, chloroplastic<br>[Nicotiana attenuata] | 28.484 | 75.261 | 39.5 | 9 | 21 | 9 | 1.005 | 0.986 | 1.01  | 1.012 | 1.026 | 0.979 | 1.005 | 7.59E-01 |
|                                                  | PREDICT<br>ED:                                                                      |        |        |      |   |    |   |       |       |       |       |       |       |       |          |
| cds.Camellia_sinensis.comp2105_1_c0_seq1_m.38150 | membrane steroid-binding protein 2-like<br>[Arachis duranensis]                     | 23.941 | 95.77  | 35   | 6 | 15 | 6 | 0.958 | 0.961 | 0.961 | 1.016 | 1.014 | 1.064 | 1.074 | 4.54E-02 |
|                                                  | PREDICT<br>ED: 40S                                                                  |        |        |      |   |    |   |       |       |       |       |       |       |       |          |
| cds.Camellia_sinensis.comp2105_2_c0_seq1_m.35948 | ribosomal protein S10-1-like<br>[Gossypium hirsutum]                                | 20.106 | 35.307 | 39.6 | 7 | 20 | 6 | 0.963 | 1.008 | 0.98  | 0.976 | 1.01  | 1.013 | 1.016 | 4.17E-01 |

|                                                    |                                                                                     |        |        |      |   |   |   |       |       |       |       |       |       |       |          |
|----------------------------------------------------|-------------------------------------------------------------------------------------|--------|--------|------|---|---|---|-------|-------|-------|-------|-------|-------|-------|----------|
|                                                    | PREDICT                                                                             |        |        |      |   |   |   |       |       |       |       |       |       |       |          |
|                                                    | ED: U3                                                                              |        |        |      |   |   |   |       |       |       |       |       |       |       |          |
| cds.Camellia_sinensis.comp2105_3_c0_seq1_m.8628    | small nucleolar RNA-associated protein 4 [Juglans regia]                            | 95.92  | 1.5142 | 0.8  | 1 | 1 | 1 |       |       |       |       |       |       |       |          |
| cds.Camellia_sinensis.comp2105_41_c0_seq1_m.5106_9 | PREDICT ED: protein SRG1 [Vitis vinifera]                                           | 17.632 | 1.1946 | 4.5  | 1 | 1 | 1 | 0.969 | 0.998 | 1.025 | 1.029 | 1.04  | 0.956 | 1.011 | 7.51E-01 |
| cds.Camellia_sinensis.comp2105_4_c0_seq1_m.28357   | PREDICT ED: protein CHAPERONE-LIKE PROTEIN OF POR1, chloroplastic [Vitis vinifera]  | 30.851 | 1.4176 | 2.9  | 1 | 1 | 1 | 0.985 | 0.989 | 1.074 | 0.957 | 0.961 | 1.041 | 0.971 | 4.93E-01 |
| cds.Camellia_sinensis.comp2105_5_c0_seq1_m.33724   | PREDICT ED: serine/arginine-rich splicing factor SR30-like isoform X1 [Ipomoea nil] | 28.857 | 9.9276 | 12.7 | 3 | 3 | 3 | 0.993 | 1.065 | 1.053 | 0.99  | 0.965 | 0.938 | 0.93  | 5.34E-02 |

|                                                  |                                                                                                   |        |        |      |    |    |    |       |       |       |       |       |       |       |          |
|--------------------------------------------------|---------------------------------------------------------------------------------------------------|--------|--------|------|----|----|----|-------|-------|-------|-------|-------|-------|-------|----------|
| cds.Camellia_sinensis.comp2105_6_c0_seq2_m.25852 | PREDICT<br>ED: 2,3-dimethylmalate lyase isoform X1<br>[Theobroma cacao]                           | 37.181 | 181.62 | 53.7 | 15 | 35 | 15 | 0.977 | 0.993 | 0.978 | 1.015 | 1.033 | 1.021 | 1.041 | 5.46E-03 |
| cds.Camellia_sinensis.comp2105_7_c0_seq1_m.43189 | PREDICT<br>ED: photosystem I reaction center subunit VI, chloroplast-like<br>[Populus euphratica] | 15.264 | 11.344 | 13.2 | 3  | 10 | 3  | 0.996 | 0.977 | 1.02  | 0.976 | 1.006 | 1.004 | 0.998 | 8.92E-01 |
| cds.Camellia_sinensis.comp2106_1_c0_seq1_m.23387 | glycerol-3-phosphate acyltransferase 3<br>[Ricinus communis]                                      | 42.707 | 1.1689 | 2.7  | 1  | 1  | 1  | 0.97  | 1.114 | 0.955 | 0.993 | 0.998 | 0.978 | 0.977 | 7.13E-01 |
| cds.Camellia_sinensis.comp2111_5_c0_seq1_m.30691 | PREDICT<br>ED: J domain-containing protein DDB_G0295729-like<br>[Gossypium raimondii]             | 39.797 | 2.0973 | 4.5  | 2  | 3  | 2  | 0.959 | 0.938 | 0.958 | 1.069 | 1.07  | 1.033 | 1.111 | 1.52E-03 |

|                                                 |                                                                                                                                                                   |        |        |      |   |    |   |       |       |       |       |       |       |       |          |
|-------------------------------------------------|-------------------------------------------------------------------------------------------------------------------------------------------------------------------|--------|--------|------|---|----|---|-------|-------|-------|-------|-------|-------|-------|----------|
| cds.Camellia_sinensis.comp21134_c0_seq2_m.41738 | PREDICT<br>ED:<br>single-stranded DNA-binding protein, mitochondrial-like [Nicotiana tabacum] late embryogenesis abundant protein, putative [Medicago truncatula] | 25.165 | 5.5732 | 8.9  | 2 | 2  | 2 |       |       |       |       |       |       |       |          |
| cds.Camellia_sinensis.comp21139_c0_seq1_m.45245 | PREDICT<br>ED:<br>tropomyosin in [Theobroma cacao]                                                                                                                | 18.743 | 9.1112 | 18.8 | 3 | 6  | 3 | 0.984 | 1.014 | 1.038 | 1.008 | 0.964 | 1.021 | 0.986 | 5.72E-01 |
| cds.Camellia_sinensis.comp21151_c0_seq2_m.38950 | PREDICT<br>ED:<br>osmotin-like protein TPM-1 [Eucalyptus grandis]                                                                                                 | 30.66  | 3.5383 | 5.7  | 1 | 1  | 1 |       |       |       |       |       |       |       |          |
| cds.Camellia_sinensis.comp21152_c0_seq1_m.42139 | PREDICT<br>ED:<br>heparanase-like protein 3 [Juglans regia]                                                                                                       | 26.182 | 45.316 | 10.6 | 2 | 10 | 2 | 0.95  | 0.926 | 0.963 | 1.076 | 1.061 | 1.076 | 1.132 | 5.62E-04 |
| cds.Camellia_sinensis.comp21166_c0_seq1_m.51507 | PREDICT<br>ED:<br>heparanase-like protein 3 [Juglans regia]                                                                                                       | 15.463 | 1.3491 | 5.7  | 1 | 2  | 1 | 1.089 | 1.001 | 1.058 | 0.963 | 0.958 | 0.923 | 0.903 | 2.28E-02 |





|                                |                                                                                                             |        |        |      |    |    |    |       |       |       |       |       |       |       |          |
|--------------------------------|-------------------------------------------------------------------------------------------------------------|--------|--------|------|----|----|----|-------|-------|-------|-------|-------|-------|-------|----------|
| cds.Camellia_sinensis.comp2126 | PREDICT<br>ED: lysine<br>histidine<br>transporter<br>1-like<br>[Lupinus<br>angustifolius]                   | 50.233 | 1.9656 | 2.7  | 1  | 1  | 1  | 0.82  | 0.924 | 1.067 | 1.133 | 1.016 | 1.089 | 1.152 | 1.51E-01 |
| cds.Camellia_sinensis.comp2127 | PREDICT<br>ED:<br>chaperonin<br>60 subunit<br>alpha 2,<br>chloroplast<br>ic-like<br>[Populus<br>euphratica] | 61.818 | 1.1618 | 6.2  | 3  | 5  | 2  | 1.088 | 0.963 | 0.975 | 0.98  | 0.892 | 1.095 | 0.981 | 7.75E-01 |
| cds.Camellia_sinensis.comp2131 | PREDICT<br>ED: fruit<br>protein<br>pKIWI502<br>[Vitis<br>vinifera]                                          | 32.794 | 36.921 | 29.5 | 7  | 10 | 6  | 1.02  | 0.979 | 0.991 | 1.002 | 1.013 | 0.993 | 1.006 | 6.73E-01 |
| cds.Camellia_sinensis.comp2135 | PREDICT<br>ED:<br>carotenoid<br>9,10(9',10'<br>)-cleavage<br>dioxygenase 1<br>[Juglans<br>regia]            | 61.464 | 148.92 | 41.7 | 19 | 42 | 19 | 0.969 | 0.99  | 0.977 | 1.023 | 1.024 | 1.018 | 1.044 | 2.70E-03 |



|                                                  |                                                                                                |        |        |      |   |   |   |       |       |       |       |       |       |       |          |
|--------------------------------------------------|------------------------------------------------------------------------------------------------|--------|--------|------|---|---|---|-------|-------|-------|-------|-------|-------|-------|----------|
| cds.Camellia_sinensis.comp2148_4_c0_seq1_m.37700 | PREDICTED:<br>peptidyl-prolyl cis-trans isomerase FKBP20-2,<br>chloroplastic [Jatropha curcas] | 33.366 | 32.118 | 21.6 | 6 | 8 | 6 | 0.955 | 0.962 | 1.048 | 1.036 | 0.985 | 0.996 | 1.018 | 6.19E-01 |
| cds.Camellia_sinensis.comp2155_8_c0_seq1_m.41743 | PREDICTED:<br>aspartokinase 1,<br>chloroplastic isoform X1<br>[Theobroma cacao]                | 24.629 | 1.5891 | 9.9  | 2 | 2 | 1 |       |       |       |       |       |       |       |          |
| cds.Camellia_sinensis.comp2157_6_c0_seq1_m.22086 | PREDICTED:<br>homogentisate 1,2-dioxygenase isoform X1<br>[Sesamum indicum]                    | 50.845 | 6.2946 | 5    | 2 | 2 | 2 | 0.858 | 0.991 | 0.93  | 1.056 | 1.088 | 1.115 | 1.173 | 2.26E-02 |
| cds.Camellia_sinensis.comp2160_6_c0_seq1_m.17315 | PREDICTED: 4-alpha-glucanotransferase,<br>chloroplastic/amyloplastic [Vitis vinifera]          | 65.701 | 7.3173 | 8.1  | 4 | 4 | 4 | 0.974 | 0.998 | 0.917 | 1.138 | 0.996 | 1.003 | 1.086 | 1.81E-01 |

|                                |                                                                                                         |        |        |      |    |    |    |       |       |       |       |       |       |       |          |
|--------------------------------|---------------------------------------------------------------------------------------------------------|--------|--------|------|----|----|----|-------|-------|-------|-------|-------|-------|-------|----------|
| cds.Camellia_sinensis.comp2172 | PREDICT<br>ED: 2-C-methyl-D-erythritol 4-phosphate cytidylyltransferase, chloroplastic [Vitis vinifera] | 35.778 | 49.58  | 38.6 | 13 | 24 | 13 | 1.015 | 1.009 | 0.986 | 1.004 | 0.99  | 0.982 | 0.989 | 3.60E-01 |
| cds.Camellia_sinensis.comp2177 | PREDICT<br>ED: heme-binding-like protein At3g10130, chloroplastic isoform X2 [Theobroma cacao]          | 33.993 | 75.585 | 48.8 | 15 | 48 | 15 | 0.897 | 0.896 | 0.918 | 1.127 | 1.079 | 1.111 | 1.224 | 1.80E-04 |
| cds.Camellia_sinensis.comp2184 | PREDICT<br>ED: calcium-transporting ATPase 1, chloroplastic [Sesamum indicum]                           | 27.654 | 5.9469 | 7.7  | 2  | 2  | 1  | 0.932 | 0.932 | 1.067 | 0.977 | 1.06  | 1.052 | 1.054 | 3.59E-01 |







|                                                  |                                                                                                   |        |        |      |    |    |    |       |       |       |       |       |       |       |          |
|--------------------------------------------------|---------------------------------------------------------------------------------------------------|--------|--------|------|----|----|----|-------|-------|-------|-------|-------|-------|-------|----------|
| cds.Camellia_sinensis.comp2224_0_c0_seq1_m.28792 | PREDICT<br>ED: basic<br>7S<br>globulin-like<br>[Juglans regia]                                    | 46.374 | 117.73 | 26.5 | 9  | 24 | 9  | 0.871 | 0.931 | 0.903 | 1.125 | 1.112 | 1.116 | 1.24  | 3.84E-04 |
| cds.Camellia_sinensis.comp2225_3_c0_seq1_m.45388 | PREDICT<br>ED: major<br>allergen<br>Pru ar 1-like<br>[Nelumbo nucifera]                           | 17.754 | 87.068 | 73.1 | 11 | 35 | 11 | 0.848 | 0.819 | 0.827 | 1.191 | 1.207 | 1.175 | 1.433 | 5.00E-06 |
| cds.Camellia_sinensis.comp2226_1_c0_seq1_m.29034 | PREDICT<br>ED:<br>pentatricopeptide<br>repeat-containing<br>protein<br>At5g66520 [Vitis vinifera] | 40.697 | -2     | 2.2  | 1  | 1  | 1  | 0.99  | 1.025 | 1.084 | 1.047 | 0.949 | 0.914 | 0.939 | 2.57E-01 |
| cds.Camellia_sinensis.comp2228_6_c0_seq1_m.20934 | PREDICT<br>ED: zinc<br>transporter<br>4,<br>chloroplastic-like<br>[Sesamum indicum]               | 32.578 | 10.504 | 11.2 | 2  | 2  | 2  | 1.044 | 1.252 | 0.935 | 0.987 | 0.965 | 0.807 | 0.854 | 2.20E-01 |



|                                                  |                                                                                  |        |        |     |   |   |   |       |       |       |       |       |       |       |          |
|--------------------------------------------------|----------------------------------------------------------------------------------|--------|--------|-----|---|---|---|-------|-------|-------|-------|-------|-------|-------|----------|
| cds.Camellia_sinensis.comp2231_7_c0_seq4_m.51213 | PREDICTED: GRIP and coiled-coil domain-containing protein 2 [Vitis vinifera]     | 12.78  | -2     | 7.3 | 1 | 1 | 1 | 1.427 | 1.238 | 1.435 | 0.553 | 0.626 | 0.6   | 0.434 | 1.60E-04 |
| cds.Camellia_sinensis.comp2234_4_c0_seq1_m.13415 | PREDICTED: plant intracellular Ras-group-related LRR protein 4 [Ziziphus jujuba] | 63.672 | 2.5108 | 2.6 | 1 | 1 | 1 |       |       |       |       |       |       |       |          |
| cds.Camellia_sinensis.comp2241_5_c0_seq1_m.35402 | PREDICTED: DNA-directed RNA polymerases II and IV subunit 5A [Citrus sinensis]   | 24.382 | 6.2704 | 9.2 | 2 | 2 | 2 | 0.967 | 1.002 | 1.01  | 0.999 | 0.928 | 1.105 | 1.018 | 7.85E-01 |
| cds.Camellia_sinensis.comp2245_1_c0_seq1_m.12748 | PREDICTED: heparanase-like protein 1 [Vitis vinifera]                            | 59.731 | 4.192  | 3.9 | 2 | 3 | 2 | 1.098 | 1.081 | 1.072 | 1.036 | 0.859 | 0.941 | 0.872 | 1.25E-01 |

|                                                  |                                                                                                                           |        |        |      |   |    |   |       |       |       |       |       |       |       |          |
|--------------------------------------------------|---------------------------------------------------------------------------------------------------------------------------|--------|--------|------|---|----|---|-------|-------|-------|-------|-------|-------|-------|----------|
| cds.Camellia_sinensis.comp2249_2_c0_seq1_m.22766 | PREDICT<br>ED: beta-glucosidase<br>BoGH3B-like<br>[Ziziphus jujuba]                                                       | 54.998 | 11.594 | 8.2  | 3 | 3  | 3 |       |       |       |       |       |       |       |          |
| cds.Camellia_sinensis.comp2250_6_c0_seq1_m.10624 | PREDICT<br>ED:<br>probably inactive<br>leucine-rich repeat receptor-like protein kinase<br>At5g48380<br>[Theobroma cacao] | 68.3   | 1.8432 | 3.1  | 2 | 2  | 2 | 0.931 | 0.917 | 0.917 | 1.139 | 1.16  | 0.98  | 1.186 | 8.89E-02 |
| cds.Camellia_sinensis.comp2253_2_c0_seq1_m.36840 | PREDICT<br>ED:<br>probable carboxylesterase<br>SOBER1-like [Vitis vinifera]                                               | 29.776 | 1.2974 | 6.2  | 2 | 2  | 2 |       |       |       |       |       |       |       |          |
| cds.Camellia_sinensis.comp2255_2_c0_seq1_m.40751 | PREDICT<br>ED:<br>plasma membrane-associated cation-binding protein 1<br>[Solanum tuberosum]                              | 21.783 | 34.546 | 28.5 | 6 | 10 | 6 | 1.025 | 0.947 | 0.952 | 1.037 | 1.042 | 1.037 | 1.066 | 1.29E-01 |



|                                |                                                                                                                                                           |        |        |      |    |    |   |       |       |       |       |       |       |       |          |  |
|--------------------------------|-----------------------------------------------------------------------------------------------------------------------------------------------------------|--------|--------|------|----|----|---|-------|-------|-------|-------|-------|-------|-------|----------|--|
| cds.Camellia_sinensis.comp2268 | PREDICT<br>ED: V-type proton ATPase subunit B 2 [Elaeis]                                                                                                  | 12.837 | 1.2244 | 26.7 | 2  | 2  | 1 |       |       |       |       |       |       |       |          |  |
| cds.Camellia_sinensis.comp2269 | PREDICT<br>ED: dihydrolipoyllysine-residue succinyltransferase component of 2-oxoglutarate dehydrogenase complex 2, mitochondrial-like [Nelumbo nucifera] | 51.101 | 107.25 | 28.5 | 14 | 31 | 8 | 1     | 0.995 | 0.988 | 0.992 | 1.001 | 1.018 | 1.009 | 3.28E-01 |  |
| cds.Camellia_sinensis.comp2269 | PREDICT<br>ED: intron-binding protein aquarius [Juglans regia]                                                                                            | 160.36 | 16.429 | 4.2  | 5  | 5  | 5 | 0.941 | 1.032 | 1.079 | 0.964 | 0.983 | 1.011 | 0.969 | 5.22E-01 |  |
| cds.Camellia_sinensis.comp2278 | cAMP-regulated phosphoprotein-like [Medicago truncatula]                                                                                                  | 17.387 | 1.3302 | 6.5  | 1  | 1  | 1 | 0.936 | 1.099 | 1.022 | 1.05  | 0.937 | 0.97  | 0.967 | 6.04E-01 |  |

|                                |                   |                                                                               |        |        |      |   |    |   |       |       |       |       |       |       |       |          |
|--------------------------------|-------------------|-------------------------------------------------------------------------------|--------|--------|------|---|----|---|-------|-------|-------|-------|-------|-------|-------|----------|
| cds.Camellia_sinensis.comp2279 | 5_c1_seq1_m.34061 | PREDICT ED: mitochondrial uncoupling protein 1 [Ziziphus jujuba]              | 28.825 | 42.105 | 19.8 | 5 | 7  | 5 | 1.036 | 1.084 | 1.031 | 0.934 | 0.991 | 0.941 | 0.91  | 1.80E-02 |
| cds.Camellia_sinensis.comp2279 | 8_c0_seq1_m.33202 | PREDICT ED: RPM1-interacting protein 4 [Vitis vinifera]                       | 28.326 | 17.158 | 11.7 | 2 | 2  | 2 |       |       |       |       |       |       |       |          |
| cds.Camellia_sinensis.comp2283 | 1_c0_seq1_m.33671 | PREDICT ED: chloroplastic lipocalin [Vitis vinifera]                          | 42.169 | 118.47 | 26.1 | 9 | 22 | 9 | 1.006 | 0.923 | 0.959 | 1     | 1.059 | 1.005 | 1.061 | 1.27E-01 |
| cds.Camellia_sinensis.comp2283 | 9_c0_seq1_m.26890 | PREDICT ED: peptide chain release factor APG3, chloroplastic [Vitis vinifera] | 47.322 | 60.411 | 18.7 | 8 | 11 | 8 | 1.012 | 1.03  | 1.025 | 0.948 | 0.965 | 0.981 | 0.944 | 6.54E-03 |
| cds.Camellia_sinensis.comp2289 | 5_c0_seq1_m.31295 | PREDICT ED: aspartic proteinase PCS1 [Sesamum indicum]                        | 44.538 | 1.3414 | 2.5  | 1 | 1  | 1 | 0.941 | 1.138 | 1     | 0.996 | 0.964 | 0.969 | 0.951 | 4.57E-01 |

|                                                  |                                                               |        |        |      |    |    |   |       |       |       |       |       |       |       |          |
|--------------------------------------------------|---------------------------------------------------------------|--------|--------|------|----|----|---|-------|-------|-------|-------|-------|-------|-------|----------|
| cds.Camellia_sinensis.comp2289_8_c0_seq1_m.56873 | Phosphoenolpyruvate carboxylase 2 [Morus notabilis]           | 13.764 | 4.6863 | 25.8 | 3  | 6  | 1 | 0.886 | 0.945 | 0.955 | 1.136 | 1.088 | 1.031 | 1.168 | 1.32E-02 |
|                                                  | PREDICT                                                       |        |        |      |    |    |   |       |       |       |       |       |       |       |          |
| cds.Camellia_sinensis.comp2294_4_c0_seq2_m.24036 | ED: protein IQ-DOMAIN 32 isoform X2 [Vitis vinifera]          | 44.643 | 4.092  | 5.8  | 2  | 2  | 2 | 0.963 | 1.031 | 1.124 | 0.955 | 0.947 | 0.984 | 0.926 | 1.78E-01 |
|                                                  | PREDICT                                                       |        |        |      |    |    |   |       |       |       |       |       |       |       |          |
|                                                  | ED:                                                           |        |        |      |    |    |   |       |       |       |       |       |       |       |          |
| cds.Camellia_sinensis.comp2299_0_c0_seq1_m.25216 | putative transferase At1g60990, chloroplastic [Juglans regia] | 45.821 | 1.5124 | 2.6  | 1  | 1  | 1 |       |       |       |       |       |       |       |          |
|                                                  | PREDICT                                                       |        |        |      |    |    |   |       |       |       |       |       |       |       |          |
|                                                  | ED:                                                           |        |        |      |    |    |   |       |       |       |       |       |       |       |          |
| cds.Camellia_sinensis.comp2301_6_c0_seq1_m.19417 | transketolase, chloroplastic [Nelumbo nucifera]               | 54.239 | 62.708 | 13.6 | 7  | 23 | 4 | 1.021 | 0.967 | 1.005 | 0.995 | 1.014 | 1.034 | 1.017 | 4.42E-01 |
|                                                  | PREDICT                                                       |        |        |      |    |    |   |       |       |       |       |       |       |       |          |
|                                                  | ED: dnaJ homolog 1, mitochondrial-like [Sesamum               |        |        |      |    |    |   |       |       |       |       |       |       |       |          |
| cds.Camellia_sinensis.comp2301_8_c0_seq1_m.18026 | 1, mitochondrial-like [Sesamum                                | 55.904 | 65.371 | 28.8 | 16 | 27 | 9 | 1.149 | 1.133 | 1.113 | 0.831 | 0.85  | 0.894 | 0.758 | 2.98E-04 |

|                                                  |                                                                                                |        |        |      |    |    |    |       |       |       |       |       |       |       |          |
|--------------------------------------------------|------------------------------------------------------------------------------------------------|--------|--------|------|----|----|----|-------|-------|-------|-------|-------|-------|-------|----------|
| cds.Camellia_sinensis.comp2304_2_c0_seq1_m.25951 | PREDICT<br>ED:<br>formamida<br>se-like<br>isoform<br>X1<br>[Ziziphus<br>jujuba]                | 51.648 | 73.137 | 30   | 12 | 23 | 12 | 0.96  | 0.947 | 0.933 | 1.032 | 1.073 | 1.052 | 1.112 | 1.62E-03 |
| cds.Camellia_sinensis.comp2304_9_c0_seq1_m.34340 | PREDICT<br>ED:<br>omega-<br>amidase,<br>chloroplast<br>ic<br>[Theobroma<br>cacao]              | 29.561 | 1.4661 | 3.4  | 1  | 1  | 1  |       |       |       |       |       |       |       |          |
| cds.Camellia_sinensis.comp2311_9_c0_seq1_m.42782 | PREDICT<br>ED:<br>disease<br>resistance<br>RPP13-<br>like<br>protein 4<br>[Capsicum<br>annuum] | 31.325 | 20.403 | 9.1  | 2  | 2  | 2  | 0.853 | 1.096 | 0.878 | 1.067 | 1.126 | 1.018 | 1.136 | 1.90E-01 |
| cds.Camellia_sinensis.comp2312_5_c0_seq1_m.49092 | PREDICT<br>ED:<br>Ras-<br>related<br>protein<br>Rab11D<br>[Morus<br>notabilis]                 | 14.03  | 18.378 | 26.8 | 3  | 4  | 3  | 0.913 | 0.915 | 1     | 1.059 | 1.008 | 1.136 | 1.133 | 5.36E-02 |
| cds.Camellia_sinensis.comp2313_6_c0_seq1_m.40278 | PREDICT<br>ED:<br>probable<br>glutathione<br>S-<br>transferase<br>[Vitis<br>vinifera]          | 25.414 | 15.839 | 29.7 | 8  | 9  | 7  | 0.978 | 0.947 | 0.937 | 1.032 | 1.108 | 1.045 | 1.113 | 1.37E-02 |











|                                                  |                                                                               |        |        |      |   |   |   |       |       |       |       |       |       |       |          |
|--------------------------------------------------|-------------------------------------------------------------------------------|--------|--------|------|---|---|---|-------|-------|-------|-------|-------|-------|-------|----------|
| cds.Camellia_sinensis.comp2335_4_c0_seq2_m.40883 | PREDICTED:<br>probable ubiquitin-conjugating enzyme E2 18 [Jatropha curcas]   | 18.272 | 2.774  | 9.3  | 2 | 4 | 2 | 0.976 | 1.011 | 0.974 | 0.996 | 1.061 | 0.955 | 1.017 | 6.47E-01 |
| cds.Camellia_sinensis.comp2335_6_c0_seq1_m.39580 | PREDICTED:<br>NADP-dependent malic enzyme-like isoform X1 [Nicotiana tabacum] | 31.6   | 3.3679 | 14.6 | 3 | 7 | 2 |       |       |       |       |       |       |       |          |
| cds.Camellia_sinensis.comp2337_5_c0_seq1_m.15225 | bZIP transcription factor TRAB1-like [Nicotiana tabacum]                      | 47.506 | 2.0024 | 7.5  | 2 | 2 | 2 | 1.008 | 1.122 | 1.073 | 0.956 | 0.866 | 0.967 | 0.871 | 4.15E-02 |
| cds.Camellia_sinensis.comp2338_3_c0_seq1_m.31016 | PREDICTED:<br>peroxidase 31 [Vitis vinifera]                                  | 36.737 | 2.4008 | 3.6  | 1 | 1 | 1 | 0.976 | 1.283 | 1.093 | 0.91  | 0.905 | 0.82  | 0.786 | 5.24E-02 |

|                                |                                                                                                             |        |        |     |   |   |   |       |       |       |       |       |       |       |          |  |
|--------------------------------|-------------------------------------------------------------------------------------------------------------|--------|--------|-----|---|---|---|-------|-------|-------|-------|-------|-------|-------|----------|--|
| cds.Camellia_sinensis.comp2340 | PREDICT<br>ED: selT-like protein isoform X4<br>[Nicotiana tomentosiformis]                                  | 25.471 | 1.1979 | 4.8 | 1 | 1 | 1 |       |       |       |       |       |       |       |          |  |
| cds.Camellia_sinensis.comp2341 | PREDICT<br>ED: UDP-4-arabinose epimerase 1 [Prunus mume]                                                    | 45.894 | 1.4122 | 2.9 | 1 | 1 | 1 |       |       |       |       |       |       |       |          |  |
| cds.Camellia_sinensis.comp2344 | PREDICT<br>ED:<br>protein<br>TRIGALACTOSYL DIACYLGLYCEROL 1,<br>chloroplastic isoform X1<br>[Juglans regia] | 38.318 | 2.6413 | 6.2 | 2 | 3 | 2 | 0.929 | 0.952 | 1.046 | 1.086 | 1.004 | 1.01  | 1.059 | 2.58E-01 |  |
| cds.Camellia_sinensis.comp2345 | PREDICT<br>ED:<br>probable methyltransferase PMT14<br>[Theobroma cacao]                                     | 69.76  | 13.154 | 8.9 | 5 | 5 | 5 | 1.031 | 1.151 | 1.183 | 0.903 | 0.731 | 0.976 | 0.776 | 5.39E-02 |  |

|                                                  |                                                                                                  |        |        |      |   |    |   |       |       |       |       |       |       |       |          |
|--------------------------------------------------|--------------------------------------------------------------------------------------------------|--------|--------|------|---|----|---|-------|-------|-------|-------|-------|-------|-------|----------|
| cds.Camellia_sinensis.comp2346_9_c0_seq2_m.34279 | 3-oxo-5-alpha-steroid 4-dehydrogenase<br>[Medicago truncatula]<br>PREDICTED: plant intracellular | 25.884 | 1.4806 | 8.4  | 2 | 3  | 2 | 0.932 | 1.01  | 0.986 | 1.032 | 1.061 | 1.002 | 1.057 | 1.27E-01 |
| cds.Camellia_sinensis.comp2348_1_c0_seq1_m.49036 | r Ras-group-related LRR protein 1-like<br>[Nicotiana attenuata]<br>PREDICTED:                    | 20.063 | 2.1263 | 8.5  | 1 | 1  | 1 |       |       |       |       |       |       |       |          |
| cds.Camellia_sinensis.comp2348_8_c0_seq1_m.40789 | glutaredoxin-like<br>[Juglans regia]<br>glutathione                                              | 12.711 | 16.597 | 31.7 | 3 | 5  | 3 | 0.934 | 0.973 | 0.949 | 1.001 | 1.089 | 1.083 | 1.111 | 2.44E-02 |
| cds.Camellia_sinensis.comp2349_2_c0_seq1_m.39466 | S-transferase DHAR2-like<br>[Sesamum indicum]                                                    | 26.223 | 82.852 | 30.2 | 5 | 14 | 4 | 0.97  | 0.994 | 1.044 | 1.011 | 0.975 | 1.001 | 0.993 | 7.97E-01 |
| cds.Camellia_sinensis.comp2349_6_c0_seq1_m.44487 |                                                                                                  | 20.864 | 10.646 | 6.3  | 1 | 2  | 1 | 0.947 | 0.979 | 1.028 | 0.937 | 1.025 | 1.096 | 1.035 | 5.54E-01 |

|                                                  |                                                                |        |        |      |   |   |   |       |       |       |       |       |       |       |          |
|--------------------------------------------------|----------------------------------------------------------------|--------|--------|------|---|---|---|-------|-------|-------|-------|-------|-------|-------|----------|
|                                                  | PREDICT                                                        |        |        |      |   |   |   |       |       |       |       |       |       |       |          |
|                                                  | ED:                                                            |        |        |      |   |   |   |       |       |       |       |       |       |       |          |
| cds.Camellia_sinensis.comp2350_4_c0_seq1_m.19034 | mitogen-activated protein kinase 2 [Ziziphus jujuba] universal | 40.538 | 54.412 | 13.5 | 4 | 7 | 4 | 0.967 | 0.999 | 0.998 | 1.046 | 1.008 | 0.978 | 1.023 | 3.69E-01 |
| cds.Camellia_sinensis.comp2351_1_c0_seq1_m.35001 | stress family protein [Populus trichocarpa]                    | 20.237 | 5.7714 | 16.8 | 3 | 4 | 3 | 0.96  | 1.153 | 1.009 | 1.072 | 0.912 | 0.903 | 0.925 | 3.72E-01 |
|                                                  | PREDICT                                                        |        |        |      |   |   |   |       |       |       |       |       |       |       |          |
|                                                  | ED:                                                            |        |        |      |   |   |   |       |       |       |       |       |       |       |          |
| cds.Camellia_sinensis.comp2351_1_c0_seq2_m.39360 | universal stress protein A-like protein [Nelumbo nucifera]     | 21.602 | 12.205 | 25   | 5 | 8 | 5 | 0.993 | 1.016 | 1.032 | 0.982 | 0.947 | 1.055 | 0.981 | 5.88E-01 |
| cds.Camellia_sinensis.comp2352_7_c0_seq1_m.22234 | PREDICT ED: alpha-L-fucosidase 1 [Juglans regia]               | 60.611 | 3.8695 | 1.9  | 1 | 2 | 1 | 0.944 | 0.927 | 1.018 | 1.078 | 0.978 | 1.08  | 1.085 | 1.33E-01 |

|                                                  |                                                                                                          |        |        |      |   |    |   |       |       |       |       |       |       |       |          |
|--------------------------------------------------|----------------------------------------------------------------------------------------------------------|--------|--------|------|---|----|---|-------|-------|-------|-------|-------|-------|-------|----------|
| cds.Camellia_sinensis.comp2354_0_c0_seq1_m.17687 | PREDICTED:<br>protein<br>TRIGALACTOSYL<br>DIACYLGLYCEROL 2,<br>chloroplastic isoform X2 [Vitis vinifera] | 30.947 | 47.709 | 16.2 | 5 | 6  | 5 | 0.961 | 0.994 | 1.008 | 1.019 | 1.021 | 1.046 | 1.042 | 6.85E-02 |
| cds.Camellia_sinensis.comp2354_0_c0_seq1_m.17688 | PREDICTED:<br>protein<br>TRIGALACTOSYL<br>DIACYLGLYCEROL 2,<br>chloroplastic<br>[Eucalyptus grandis]     | 11.466 | 32.127 | 42.2 | 3 | 8  | 3 | 0.971 | 0.993 | 0.947 | 1.071 | 0.956 | 1.099 | 1.074 | 1.96E-01 |
| cds.Camellia_sinensis.comp2354_3_c0_seq1_m.33026 | PREDICTED:<br>cinnamoyl-CoA<br>reductase 1<br>[Solanum tuberosum]                                        | 36.641 | 29.051 | 21.3 | 7 | 16 | 7 | 1.264 | 1.283 | 1.25  | 0.716 | 0.719 | 0.699 | 0.562 | 4.89E-07 |
| cds.Camellia_sinensis.comp2354_9_c0_seq1_m.33670 | PREDICTED:<br>proactivator<br>polypeptide-like 1<br>[Theobroma cacao]                                    | 27.651 | 46.085 | 18.1 | 4 | 9  | 4 | 0.995 | 0.965 | 0.977 | 1.052 | 1.038 | 1.034 | 1.064 | 3.90E-03 |



|                                                  |                                                                                          |        |        |      |    |    |    |       |       |       |       |       |       |       |          |
|--------------------------------------------------|------------------------------------------------------------------------------------------|--------|--------|------|----|----|----|-------|-------|-------|-------|-------|-------|-------|----------|
| cds.Camellia_sinensis.comp2355_1_c0_seq1_m.11022 | PREDICTED: transcription initiation factor TFIID subunit 15b [Sesamum indicum]           | 41.732 | 30.181 | 13   | 5  | 8  | 5  | 1.125 | 1.148 | 1.05  | 0.864 | 0.864 | 0.914 | 0.795 | 2.24E-03 |
| cds.Camellia_sinensis.comp2355_2_c0_seq1_m.31138 | PREDICTED: ubiquitin-like domain-containing CTD phosphatase [Vitis vinifera]             | 37.965 | 8.6382 | 6.6  | 2  | 2  | 2  | 1.068 | 1.062 | 1.041 | 0.916 | 0.962 | 0.938 | 0.888 | 1.82E-03 |
| cds.Camellia_sinensis.comp2358_2_c0_seq1_m.19162 | PREDICTED: acetolactate synthase small subunit 1, chloroplastic-like [Solanum tuberosum] | 54.117 | 56.209 | 26.6 | 10 | 20 | 10 | 0.955 | 0.994 | 0.995 | 1.045 | 1.027 | 1.037 | 1.056 | 1.92E-02 |
| cds.Camellia_sinensis.comp2359_2_c0_seq1_m.24273 | PREDICTED: endoribonuclease E-like protein [Medicago truncatula]                         | 48.129 | 1.3727 | 1.9  | 1  | 1  | 1  | 1.046 | 1.02  | 0.918 | 1.045 | 0.978 | 0.999 | 1.013 | 7.71E-01 |

|                                                  |                                                                                            |        |        |      |   |    |   |       |       |       |       |       |       |       |          |
|--------------------------------------------------|--------------------------------------------------------------------------------------------|--------|--------|------|---|----|---|-------|-------|-------|-------|-------|-------|-------|----------|
|                                                  | PREDICT<br>ED:<br>translation<br>initiation<br>factor IF-<br>2,                            | 28.92  | 6.8192 | 20.5 | 5 | 6  | 5 | 1.15  | 1.22  | 1.173 | 0.827 | 0.811 | 0.791 | 0.686 | 6.16E-05 |
| cds.Camellia_sinensis.comp2359_4_c0_seq1_m.30848 | chloroplast<br>ic isoform<br>X1<br>[Sesamum<br>indicum]                                    |        |        |      |   |    |   |       |       |       |       |       |       |       |          |
|                                                  | PREDICT<br>ED:<br>secretory<br>carrier-<br>associated<br>membrane<br>protein 2-<br>like    | 34.192 | 63.879 | 26.5 | 6 | 7  | 6 | 1.014 | 0.964 | 1.017 | 1.033 | 0.951 | 0.98  | 0.99  | 7.38E-01 |
| cds.Camellia_sinensis.comp2360_3_c1_seq1_m.31837 | [Nicotiana<br>tabacum]<br>muniscin<br>carboxy-<br>terminal<br>mu-like<br>domain<br>protein |        |        |      |   |    |   |       |       |       |       |       |       |       |          |
| cds.Camellia_sinensis.comp2360_4_c0_seq1_m.10644 | [Medicago<br>truncatula]<br>NtPRp27-<br>like<br>protein<br>precursor                       | 32.731 | 4.8523 | 10   | 3 | 3  | 3 | 1.079 | 0.978 | 0.962 | 0.988 | 0.98  | 1.002 | 0.984 | 6.99E-01 |
| cds.Camellia_sinensis.comp2360_7_c0_seq1_m.42110 | [Solanum<br>tuberosum]                                                                     | 27.16  | 28.377 | 23.3 | 5 | 15 | 4 | 0.942 | 0.916 | 0.935 | 1.077 | 1.09  | 1.059 | 1.155 | 2.60E-04 |

|                                |                   |                                                                                              |        |        |      |    |    |    |       |       |       |       |       |       |       |          |
|--------------------------------|-------------------|----------------------------------------------------------------------------------------------|--------|--------|------|----|----|----|-------|-------|-------|-------|-------|-------|-------|----------|
| cds.Camellia_sinensis.comp2361 | 8_c0_seq1_m.33504 | PREDICTED:<br>thioredoxin-like protein AAED1, chloroplastic [Pyrus x bretschneideri]         | 29.437 | 56.459 | 36.4 | 10 | 14 | 10 | 1.035 | 1.015 | 1.044 | 0.947 | 0.988 | 0.952 | 0.933 | 1.16E-02 |
| cds.Camellia_sinensis.comp2362 | 9_c1_seq1_m.46035 | PREDICTED:<br>nuclear transcription factor Y subunit B-3 [Vitis vinifera]                    | 14.512 | 39.23  | 11.3 | 1  | 2  | 1  | 0.986 | 1.104 | 1.046 | 0.962 | 0.899 | 1.001 | 0.913 | 1.14E-01 |
| cds.Camellia_sinensis.comp2363 | 8_c0_seq2_m.33624 | PREDICTED:<br>iron-sulfur cluster co-chaperone protein HscB, mitochondrial isoform X1 [Vitis | 31.34  | 3.3966 | 4.1  | 1  | 1  | 1  | 1.041 | 1.033 | 0.906 | 0.879 | 0.966 | 1.167 | 1.011 | 9.55E-01 |
| cds.Camellia_sinensis.comp2364 | 0_c0_seq1_m.22313 | PREDICTED:<br>formate dehydrogenase, mitochondrial [Theobroma cacao]                         | 42.427 | 133.56 | 38.3 | 14 | 67 | 14 | 0.988 | 0.975 | 0.983 | 1.021 | 1.021 | 1.019 | 1.039 | 6.15E-04 |

|                                |                                                                                    |        |        |      |   |    |   |       |       |       |       |       |       |       |          |
|--------------------------------|------------------------------------------------------------------------------------|--------|--------|------|---|----|---|-------|-------|-------|-------|-------|-------|-------|----------|
| cds.Camellia_sinensis.comp2364 | PREDICTED: DNA-directed RNA polymerase II subunit RPB2 [Ziziphus]                  | 134.92 | 9.3801 | 3.1  | 3 | 4  | 3 | 1.122 | 1.136 | 1.161 | 0.891 | 0.862 | 0.848 | 0.761 | 1.01E-04 |
| cds.Camellia_sinensis.comp2366 | PREDICTED: vesicle-associated membrane protein 711 [Nicotiana tabacum]             | 27.066 | 3.5117 | 16.2 | 4 | 6  | 4 | 1.019 | 1.016 | 1.016 | 0.998 | 0.99  | 0.976 | 0.971 | 4.81E-02 |
| cds.Camellia_sinensis.comp2367 | PREDICTED: protein STRICTOSIDINE SYNTHASE-LIKE 4-like [Juglans regia]              | 41.47  | 23.551 | 18.5 | 7 | 11 | 7 | 1.009 | 0.995 | 0.97  | 0.951 | 1.029 | 1.018 | 1.008 | 7.95E-01 |
| cds.Camellia_sinensis.comp2368 | PREDICTED: probable thylakoid lumen protein sll1769 isoform X2 [Solanum tuberosum] | 24.783 | 93.386 | 27.3 | 6 | 18 | 6 | 0.905 | 0.874 | 0.887 | 1.117 | 1.108 | 1.127 | 1.257 | 3.71E-05 |



|                                                 |                                                                                                |        |        |      |   |    |   |       |       |       |       |       |       |       |          |
|-------------------------------------------------|------------------------------------------------------------------------------------------------|--------|--------|------|---|----|---|-------|-------|-------|-------|-------|-------|-------|----------|
| cds.Camellia_sinensis.comp23718_c0_seq2_m.39301 | PREDICTED:<br>serine/arginine-rich splicing factor RSZ21-like isoform X1<br>[Arachis ipaensis] | 20.113 | 2.1786 | 7.3  | 1 | 1  | 1 | 1.057 | 1.037 | 0.991 | 0.944 | 0.997 | 0.97  | 0.944 | 7.96E-02 |
| cds.Camellia_sinensis.comp23719_c0_seq1_m.9918  | PREDICTED: THO complex subunit 4A<br>[Arachis duranensis]                                      | 24.963 | 31.904 | 30.7 | 7 | 11 | 5 | 1.093 | 1.122 | 1.048 | 0.887 | 0.914 | 0.948 | 0.842 | 3.44E-03 |
| cds.Camellia_sinensis.comp23725_c0_seq1_m.39683 | transferrin glycosyl group transferase<br>[Arabidopsis thaliana]                               | 25.464 | 7.86   | 8.6  | 2 | 4  | 2 | 0.959 | 0.974 | 0.965 | 1.005 | 1.111 | 1.008 | 1.078 | 1.56E-01 |
| cds.Camellia_sinensis.comp23726_c0_seq2_m.17993 | PREDICTED:<br>polyadenylate-binding protein RBP47<br>[Vitis                                    | 47.033 | 6.6267 | 6.3  | 3 | 3  | 3 | 0.918 | 1.006 | 1.03  | 1.026 | 1.054 | 0.99  | 1.039 | 3.75E-01 |

|                                                  |                                                                                           |        |        |      |    |    |    |       |       |       |       |       |       |       |          |
|--------------------------------------------------|-------------------------------------------------------------------------------------------|--------|--------|------|----|----|----|-------|-------|-------|-------|-------|-------|-------|----------|
| cds.Camellia_sinensis.comp2373_1_c0_seq1_m.24376 | PREDICT<br>ED: ATP phosphoribosyltransferase 2, chloroplastic-like<br>[Nicotiana tabacum] | 44.373 | 48.254 | 21.1 | 8  | 11 | 8  | 0.975 | 1.036 | 0.99  | 1.019 | 1.001 | 0.988 | 1.002 | 9.05E-01 |
| cds.Camellia_sinensis.comp2373_6_c0_seq2_m.11787 | PREDICT<br>ED: translation factor GUF1 homolog, chloroplastic<br>[Nelumbo nucifera]       | 75.161 | 6.6564 | 5.9  | 4  | 4  | 4  | 1.066 | 1.089 | 1.062 | 0.899 | 0.939 | 0.948 | 0.866 | 1.36E-03 |
| cds.Camellia_sinensis.comp2373_7_c0_seq1_m.46339 |                                                                                           | 18.499 | 49.485 | 17.3 | 2  | 4  | 2  | 1.037 | 0.987 | 0.985 | 1.014 | 0.954 | 1.027 | 0.995 | 8.71E-01 |
| cds.Camellia_sinensis.comp2374_2_c0_seq1_m.51948 | PREDICT<br>ED: probable glutathione S-transferase<br>[Ricinus communis]                   | 12.013 | 1.1714 | 7.5  | 1  | 1  | 1  |       |       |       |       |       |       |       |          |
| cds.Camellia_sinensis.comp2376_7_c0_seq6_m.6889  | PREDICT<br>ED: pre-mRNA-processing factor 39 isoform X1<br>[Vitis vinifera]               | 97.418 | 49.581 | 11.6 | 11 | 14 | 11 | 0.98  | 0.997 | 0.988 | 1.011 | 1.012 | 1.011 | 1.023 | 4.37E-02 |





|                                                  |                                                                                                                |        |        |      |   |    |   |       |       |       |       |       |       |       |          |
|--------------------------------------------------|----------------------------------------------------------------------------------------------------------------|--------|--------|------|---|----|---|-------|-------|-------|-------|-------|-------|-------|----------|
| cds.Camellia_sinensis.comp2381_2_c0_seq3_m.16318 | PREDICT<br>ED:<br>probable<br>pre-mRNA-splicing factor ATP-dependent RNA helicase [Vigna radiata var. radiata] | 60.597 | 27.547 | 13.1 | 7 | 11 | 7 | 0.972 | 0.994 | 1.049 | 0.997 | 1.004 | 0.996 | 0.994 | 8.32E-01 |
| cds.Camellia_sinensis.comp2381_4_c0_seq1_m.30203 | PREDICT<br>ED:<br>reticulon-like protein B8 [Vitis vinifera]                                                   | 27.492 | 28.028 | 23.7 | 6 | 10 | 6 | 1.047 | 0.999 | 1     | 0.983 | 0.978 | 0.992 | 0.969 | 1.27E-01 |
| cds.Camellia_sinensis.comp2381_5_c0_seq2_m.36254 | PREDICT<br>ED: ras-related protein RABC1 [Vitis vinifera]                                                      | 23.477 | 32.347 | 24.3 | 4 | 9  | 3 | 0.988 | 0.969 | 1.047 | 1.095 | 1.067 | 1.009 | 1.056 | 1.82E-01 |
| cds.Camellia_sinensis.comp2381_6_c0_seq1_m.50338 | PREDICT<br>ED:<br>photosynthetic NDH subunit of complex B3, chloroplastic [Jatropha curcas]                    | 19.385 | 4.4973 | 5.6  | 1 | 2  | 1 | 1.155 | 1.115 | 1.098 | 0.94  | 0.836 | 0.826 | 0.773 | 4.08E-03 |

|                                                  |                                                                                             |        |        |      |    |    |    |       |       |       |       |       |       |       |          |
|--------------------------------------------------|---------------------------------------------------------------------------------------------|--------|--------|------|----|----|----|-------|-------|-------|-------|-------|-------|-------|----------|
| cds.Camellia_sinensis.comp2381_7_c0_seq1_m.16439 | PREDICT<br>ED: ATP-dependent RNA helicase DBP2-like [Nelumbo nucifera]                      | 60.974 | 3.7866 | 8    | 5  | 9  | 3  | 0.933 | 0.975 | 1.017 | 1.066 | 1.01  | 1.024 | 1.06  | 1.20E-01 |
| cds.Camellia_sinensis.comp2382_2_c0_seq1_m.12574 | PREDICT<br>ED: phenylalanine--tRNA ligase beta subunit, cytoplasmic-like [Nelumbo nucifera] | 66.507 | 25.283 | 21.1 | 11 | 15 | 11 | 0.944 | 1     | 0.948 | 1.076 | 1.071 | 1.042 | 1.103 | 9.66E-03 |
| cds.Camellia_sinensis.comp2382_9_c0_seq1_m.33036 | PREDICT<br>ED: annexin D4 [Vitis vinifera]                                                  | 37.33  | 25.58  | 25   | 9  | 14 | 9  | 1.078 | 1.078 | 1.043 | 0.901 | 0.926 | 0.929 | 0.862 | 5.25E-04 |

| PREDICTED:                                                                                                                                                                                                                                             |        |        |      |    |    |    |       |       |       |       |       |       |       |          |  |
|--------------------------------------------------------------------------------------------------------------------------------------------------------------------------------------------------------------------------------------------------------|--------|--------|------|----|----|----|-------|-------|-------|-------|-------|-------|-------|----------|--|
| bifunctional 3-dehydroquininate dehydratase/shikimate dehydrogenase, chloroplastic-like isoform X1 [Daucus carota subsp. sativus] ribosomal RNA small subunit methyltransferase G [Arabidopsis] probable calcium-binding protein CML21 [Cajanus cajan] |        |        |      |    |    |    |       |       |       |       |       |       |       |          |  |
| cds.Camellia_sinensis.comp23849_c0_seq15_m.12318                                                                                                                                                                                                       | 57.516 | 88.486 | 21.9 | 11 | 17 | 10 | 1.032 | 1.081 | 1.068 | 0.91  | 0.975 | 0.911 | 0.879 | 8.38E-03 |  |
| cds.Camellia_sinensis.comp23854_c0_seq1_m.38600                                                                                                                                                                                                        | 30.251 | 74.71  | 39.6 | 10 | 19 | 10 | 0.958 | 0.967 | 0.974 | 1.074 | 1.056 | 1.027 | 1.089 | 3.60E-03 |  |
| cds.Camellia_sinensis.comp23861_c0_seq1_m.37897                                                                                                                                                                                                        | 26.354 | 16.126 | 19.2 | 4  | 4  | 4  | 1.121 | 1.01  | 1.03  | 1.01  | 0.945 | 0.921 | 0.91  | 8.92E-02 |  |

|                                                  |                                                                                                 |        |        |      |    |    |    |       |       |       |       |       |       |       |          |
|--------------------------------------------------|-------------------------------------------------------------------------------------------------|--------|--------|------|----|----|----|-------|-------|-------|-------|-------|-------|-------|----------|
| cds.Camellia_sinensis.comp2386_2_c0_seq2_m.17829 | PREDICT<br>ED: fe-S<br>cluster assembly factor HCF101, chloroplastic [Vitis vinifera]           | 42.728 | 68.602 | 19.4 | 6  | 9  | 6  | 1.04  | 1.004 | 1.055 | 0.97  | 0.937 | 0.941 | 0.919 | 9.98E-03 |
| cds.Camellia_sinensis.comp2386_6_c0_seq1_m.32836 | PREDICT<br>ED:<br>probable prolyl 4-hydroxylase 4 [Ricinus communis]                            | 35.937 | 3.9901 | 6.8  | 2  | 2  | 2  | 1.071 | 1.074 | 0.945 | 0.945 | 0.976 | 0.98  | 0.939 | 2.32E-01 |
| cds.Camellia_sinensis.comp2387_3_c0_seq2_m.6052  | PREDICT<br>ED: DNA<br>gyrase subunit A, chloroplastic/mitochondrial isoform X1 [Vitis vinifera] | 102.56 | 35.639 | 13.3 | 12 | 16 | 12 | 0.975 | 0.984 | 0.981 | 1.038 | 1.019 | 1.02  | 1.047 | 2.30E-03 |
| cds.Camellia_sinensis.comp2387_7_c0_seq1_m.18718 | PREDICT<br>ED:<br>galactokinase-like [Ziziphus jujuba]                                          | 54.462 | 184.09 | 45.3 | 18 | 36 | 15 | 0.981 | 0.967 | 0.964 | 1.026 | 0.996 | 1.01  | 1.041 | 1.63E-02 |

|                                                                 |                                                                                                                                |        |        |      |   |    |   |       |       |       |       |       |       |       |          |
|-----------------------------------------------------------------|--------------------------------------------------------------------------------------------------------------------------------|--------|--------|------|---|----|---|-------|-------|-------|-------|-------|-------|-------|----------|
|                                                                 | PREDICT<br>ED:<br>photosynth<br>etic NDH<br>subunit of<br>subcomple<br>x B 4,<br>chloroplast<br>ic-like<br>[Vitis<br>vinifera] |        |        |      |   |    |   |       |       |       |       |       |       |       |          |
| cds.Camell<br>ia_sinensis<br>.comp2388<br>1_c0_seq1<br>_m.36848 |                                                                                                                                | 21.646 | 11.759 | 17.2 | 4 | 6  | 4 | 1.006 | 1.008 | 0.989 | 0.974 | 0.993 | 1.019 | 0.994 | 7.07E-01 |
|                                                                 | PREDICT<br>ED:<br>divinyl<br>chlorophyl<br>lide a 8-<br>vinyl-<br>reductase,<br>chloroplast<br>ic<br>[Jatropha<br>curcas]      |        |        |      |   |    |   |       |       |       |       |       |       |       |          |
| cds.Camell<br>ia_sinensis<br>.comp2388<br>4_c0_seq1<br>_m.19157 |                                                                                                                                | 46.245 | 63.188 | 21   | 8 | 11 | 8 | 1.003 | 1.03  | 1.045 | 0.976 | 1.031 | 0.953 | 0.962 | 2.06E-01 |
|                                                                 | PREDICT<br>ED:<br>glycine-<br>rich<br>domain-<br>containing<br>protein 1-<br>like<br>[Juglans<br>regia]                        |        |        |      |   |    |   |       |       |       |       |       |       |       |          |
| cds.Camell<br>ia_sinensis<br>.comp2388<br>5_c0_seq1<br>_m.9327  |                                                                                                                                | 87.586 | 3.4479 | 1.4  | 1 | 1  | 1 | 0.973 | 1.077 | 1.054 | 1.064 | 0.953 | 0.891 | 0.937 | 3.29E-01 |

|                                                  |                                                                                                                 |        |        |      |    |    |    |       |       |       |       |       |       |       |          |
|--------------------------------------------------|-----------------------------------------------------------------------------------------------------------------|--------|--------|------|----|----|----|-------|-------|-------|-------|-------|-------|-------|----------|
| cds.Camellia_sinensis.comp2389_1_c0_seq2_m.26046 | PREDICTED:<br>aminoacyl tRNA synthase complex-interacting multifunctional protein 1 isoform X2 [Vitis vinifera] | 41.356 | 14.133 | 13.7 | 6  | 7  | 6  | 1.019 | 1.007 | 1.01  | 0.989 | 1.002 | 0.96  | 0.972 | 9.59E-02 |
| cds.Camellia_sinensis.comp2390_5_c0_seq1_m.37019 | PREDICTED:<br>haloacid dehalogenase-like hydrolase domain-containing protein At3g48420 [Nicotiana glauca]       | 27.422 | 72.802 | 40.3 | 10 | 23 | 10 | 1.027 | 1.02  | 1.029 | 0.969 | 1.002 | 0.973 | 0.957 | 1.56E-02 |
| cds.Camellia_sinensis.comp2391_4_c0_seq1_m.17817 | PREDICTED:<br>aminopeptidase M1-like [Juglans regia]                                                            | 56.968 | 96.165 | 35.9 | 21 | 39 | 21 | 0.95  | 0.944 | 0.95  | 1.076 | 1.054 | 1.05  | 1.118 | 1.42E-04 |

|                                                 |                                                                                         |        |        |      |    |    |    |       |       |       |       |       |       |       |          |
|-------------------------------------------------|-----------------------------------------------------------------------------------------|--------|--------|------|----|----|----|-------|-------|-------|-------|-------|-------|-------|----------|
| cds.Camellia_sinensis.comp23927_c0_seq1_m.51036 | PREDICT<br>ED:<br>thioredoxin M-type, chloroplast-like<br>[Fragaria vesca subsp. vesca] | 13.205 | 3.8723 | 15.3 | 2  | 8  | 1  | 1.042 | 1.05  | 0.985 | 1.032 | 0.961 | 0.954 | 0.958 | 2.49E-01 |
| cds.Camellia_sinensis.comp23928_c0_seq1_m.4633  | PREDICT<br>ED:<br>coatomer subunit beta-1<br>[Theobroma cacao]                          | 105.71 | 98.623 | 23.8 | 19 | 29 | 19 | 1.027 | 1.017 | 0.99  | 0.97  | 1.026 | 1.006 | 0.989 | 6.15E-01 |
| cds.Camellia_sinensis.comp23930_c0_seq1_m.9730  | PREDICT<br>ED: long chain acyl-CoA synthetase 8<br>[Sesamum indicum]                    | 80.241 | 84.322 | 21.6 | 13 | 19 | 13 | 1.008 | 0.988 | 1.013 | 1.005 | 0.982 | 0.993 | 0.99  | 3.95E-01 |
| cds.Camellia_sinensis.comp23931_c0_seq1_m.30689 | PREDICT<br>ED:<br>thylakoid membrane protein ssl2009-like<br>[Nicotiana tabacum]        | 24.727 | 82.523 | 13.3 | 3  | 5  | 3  | 1.079 | 1.085 | 1.047 | 0.937 | 0.969 | 0.902 | 0.874 | 4.60E-03 |







|                                                  |                                                                                                         |        |        |      |   |    |   |       |       |       |       |       |       |       |          |
|--------------------------------------------------|---------------------------------------------------------------------------------------------------------|--------|--------|------|---|----|---|-------|-------|-------|-------|-------|-------|-------|----------|
| cds.Camellia_sinensis.comp2400_2_c0_seq1_m.29975 | PREDICTED:<br>probable hydroxylglutathione hydrolase 2, chloroplastic [Capsicum annuum]                 | 39.225 | 29.218 | 20.1 | 6 | 9  | 6 | 1.05  | 1.081 | 1.073 | 0.948 | 0.915 | 0.903 | 0.863 | 9.64E-04 |
| cds.Camellia_sinensis.comp2400_3_c0_seq1_m.33142 | PREDICTED:<br>phospholipid hydroperoxide glutathione peroxidase 1, chloroplastic-like [Sesamum indicum] | 31.524 | 76.61  | 34   | 8 | 26 | 8 | 1.051 | 0.992 | 1.015 | 0.955 | 0.981 | 0.978 | 0.953 | 6.32E-02 |
| cds.Camellia_sinensis.comp2402_8_c0_seq1_m.36099 | PREDICTED:<br>UPF0235 protein At5g63440 [Ricinus communis]                                              | 25.76  | 1.8266 | 6.9  | 2 | 2  | 2 | 1     | 1.346 | 0.933 | 0.894 | 0.879 | 0.928 | 0.824 | 2.52E-01 |
| cds.Camellia_sinensis.comp2403_6_c0_seq2_m.16475 | PREDICTED:<br>probable beta-D-xylosidase 5 [Theobroma cacao]                                            | 73.884 | 57.593 | 13.3 | 7 | 9  | 7 | 0.879 | 0.921 | 0.92  | 1.102 | 1.062 | 1.139 | 1.214 | 1.58E-03 |



|                                                 |                                                                                                                             |        |        |      |   |    |   |       |       |       |       |       |       |       |          |
|-------------------------------------------------|-----------------------------------------------------------------------------------------------------------------------------|--------|--------|------|---|----|---|-------|-------|-------|-------|-------|-------|-------|----------|
| cds.Camellia_sinensis.comp24053_c0_seq4_m.11134 | PREDICTED:<br>probable Xaa-Pro aminopeptidase P [Vitis vinifera]                                                            | 23.791 | 8.4049 | 8.8  | 3 | 4  | 3 | 0.994 | 1.055 | 0.933 | 1.004 | 0.997 | 1.015 | 1.011 | 7.59E-01 |
| cds.Camellia_sinensis.comp24057_c0_seq1_m.30493 | PREDICTED:<br>nuclear pore complex protein NUP35 [Ipomoea nil] calcium-binding EF hand family protein [Populus trichocarpa] | 35.989 | 7.8803 | 10.3 | 3 | 3  | 3 | 0.881 | 1.251 | 0.974 | 1.001 | 0.885 | 1.017 | 0.935 | 6.33E-01 |
| cds.Camellia_sinensis.comp24068_c0_seq1_m.34682 | PREDICTED:<br>rhodanese-like domain-containing protein 9, chloroplastic [Vitis vinifera]                                    | 18.464 | 8.907  | 23.6 | 4 | 10 | 4 | 0.962 | 1.028 | 0.961 | 1.016 | 1.028 | 1.033 | 1.043 | 1.38E-01 |
| cds.Camellia_sinensis.comp24075_c0_seq6_m.36125 | PREDICTED:<br>rhodanese-like domain-containing protein 9, chloroplastic [Vitis vinifera]                                    | 25.977 | 18.236 | 24.7 | 6 | 11 | 6 | 1.041 | 1.005 | 1.039 | 0.961 | 0.959 | 0.979 | 0.94  | 9.22E-03 |

|                                                  |                                                                                                                                       |        |        |      |    |    |    |       |       |       |       |       |       |       |          |
|--------------------------------------------------|---------------------------------------------------------------------------------------------------------------------------------------|--------|--------|------|----|----|----|-------|-------|-------|-------|-------|-------|-------|----------|
|                                                  | PREDICT<br>ED: 3-                                                                                                                     |        |        |      |    |    |    |       |       |       |       |       |       |       |          |
| cds.Camellia_sinensis.comp2407_7_c0_seq1_m.23151 | isopropyl malate dehydrogenase, chloroplastic [Vitis vinifera]                                                                        | 43.362 | 45.791 | 26.2 | 11 | 21 | 11 | 1.015 | 1.045 | 1.008 | 1     | 0.976 | 0.972 | 0.961 | 4.81E-02 |
|                                                  | PREDICT<br>ED: SURP<br>and G-<br>patch<br>domain-<br>containing<br>protein 1-<br>like<br>protein<br>isoform<br>X1 [Vitis<br>vinifera] |        |        |      |    |    |    |       |       |       |       |       |       |       |          |
| cds.Camellia_sinensis.comp2407_8_c0_seq2_m.19441 |                                                                                                                                       | 47.91  | 2.7308 | 5.7  | 2  | 2  | 2  |       |       |       |       |       |       |       |          |
|                                                  | PREDICT<br>ED: ATP-<br>dependent<br>DNA<br>helicase<br>RecQ-like<br>[Prunus<br>mume]                                                  |        |        |      |    |    |    |       |       |       |       |       |       |       |          |
| cds.Camellia_sinensis.comp2409_4_c0_seq1_m.8183  |                                                                                                                                       | 99.53  | 1.4642 | 1.8  | 2  | 2  | 2  | 0.975 | 0.911 | 1.011 | 1.068 | 1.017 | 1.04  | 1.079 | 8.54E-02 |





|                                                 |                                                                                              |        |        |      |   |    |   |       |       |       |       |       |       |       |          |
|-------------------------------------------------|----------------------------------------------------------------------------------------------|--------|--------|------|---|----|---|-------|-------|-------|-------|-------|-------|-------|----------|
| cds.Camellia_sinensis.comp24128_c0_seq1_m.15428 | PREDICT<br>ED:<br>cytochrome P450 97B2, chloroplastic [Vitis vinifera]                       | 58.713 | 41.12  | 16   | 8 | 18 | 8 | 1.016 | 1.031 | 1.059 | 1.038 | 0.945 | 0.942 | 0.942 | 1.48E-01 |
| cds.Camellia_sinensis.comp24139_c0_seq1_m.34363 | PREDICT<br>ED:<br>probable aminopyridine aminohydroxylase, mitochondrial [Nicotiana tabacum] | 43.544 | 3.955  | 5.7  | 2 | 3  | 1 | 0.952 | 1.013 | 0.997 | 1.027 | 0.96  | 1.067 | 1.031 | 4.53E-01 |
| cds.Camellia_sinensis.comp24152_c0_seq1_m.44297 | PREDICT<br>ED:<br>cysteine proteinase 15A-like [Ziziphus jujuba]                             | 28.609 | 7.9937 | 16.3 | 4 | 5  | 3 | 1.014 | 0.938 | 0.957 | 0.982 | 1.065 | 1.063 | 1.069 | 1.34E-01 |
| cds.Camellia_sinensis.comp24163_c0_seq1_m.42497 | PREDICT<br>ED:<br>ribosome-binding factor PSRP1, chloroplastic [Citrus sinensis]             | 25.735 | 3.7748 | 4.3  | 2 | 3  | 2 | 1.181 | 1.215 | 1.211 | 0.784 | 0.813 | 0.762 | 0.654 | 3.69E-05 |



|                                |                                                                                                                                                                                          |        |        |      |   |    |   |       |       |       |       |       |       |       |          |
|--------------------------------|------------------------------------------------------------------------------------------------------------------------------------------------------------------------------------------|--------|--------|------|---|----|---|-------|-------|-------|-------|-------|-------|-------|----------|
| cds.Camellia_sinensis.comp2416 | PREDICT<br>ED:<br>protein<br>ECERIFE RUM 26<br>[Vitis vinifera]                                                                                                                          | 49.78  | 18.322 | 13.3 | 5 | 8  | 5 | 1.223 | 1.255 | 1.319 | 0.68  | 0.807 | 0.629 | 0.557 | 1.56E-03 |
| cds.Camellia_sinensis.comp2416 | PREDICT<br>ED:<br>serine-threonine<br>kinase<br>receptor-associated<br>protein-like<br>[Ziziphus jujuba]<br>ribosomal<br>RNA<br>small<br>subunit<br>methyltransferase J<br>[Arabidopsis] | 37.337 | 75.928 | 29   | 9 | 15 | 9 | 0.962 | 0.987 | 0.958 | 1.028 | 1.038 | 1.024 | 1.063 | 3.84E-03 |
| cds.Camellia_sinensis.comp2416 | PREDICT<br>ED:<br>mediator-associated<br>protein 1<br>[Cucumis sativus]                                                                                                                  | 41.529 | 44.173 | 17.8 | 5 | 9  | 5 | 1.074 | 1.107 | 1.229 | 0.87  | 0.803 | 0.843 | 0.738 | 2.98E-03 |
| cds.Camellia_sinensis.comp2417 | PREDICT<br>ED:<br>mediator-associated<br>protein 1<br>[Cucumis sativus]                                                                                                                  | 41.899 | 10.368 | 9.3  | 3 | 4  | 3 | 1.019 | 0.993 | 1.034 | 0.948 | 0.863 | 1.079 | 0.949 | 4.38E-01 |

|                                                  |                                                          |        |        |      |   |    |   |       |       |       |       |       |       |       |          |
|--------------------------------------------------|----------------------------------------------------------|--------|--------|------|---|----|---|-------|-------|-------|-------|-------|-------|-------|----------|
|                                                  | PREDICT                                                  |        |        |      |   |    |   |       |       |       |       |       |       |       |          |
|                                                  | ED: L-                                                   |        |        |      |   |    |   |       |       |       |       |       |       |       |          |
| cds.Camellia_sinensis.comp2418_2_c0_seq1_m.28653 | galactose dehydrogenase [Fragaria vesca subsp. vesca]    | 34.57  | 51.297 | 27.6 | 6 | 8  | 6 | 0.965 | 1.022 | 1.006 | 0.951 | 1.022 | 1.009 | 0.996 | 8.97E-01 |
|                                                  | PREDICT                                                  |        |        |      |   |    |   |       |       |       |       |       |       |       |          |
|                                                  | ED:                                                      |        |        |      |   |    |   |       |       |       |       |       |       |       |          |
| cds.Camellia_sinensis.comp2418_7_c0_seq2_m.39619 | protein PEROXIN-4 [Ipomoea nil]                          | 17.701 | 2.7964 | 10.8 | 1 | 1  | 1 |       |       |       |       |       |       |       |          |
|                                                  | PREDICT                                                  |        |        |      |   |    |   |       |       |       |       |       |       |       |          |
|                                                  | ED:                                                      |        |        |      |   |    |   |       |       |       |       |       |       |       |          |
| cds.Camellia_sinensis.comp2419_6_c0_seq1_m.46591 | calcium-binding allergen Ole e 8 [Solanum tuberosum]     | 19.086 | 63.181 | 36.4 | 5 | 10 | 5 | 0.954 | 0.948 | 0.977 | 1.064 | 1.04  | 1.037 | 1.091 | 2.08E-03 |
|                                                  | PREDICT                                                  |        |        |      |   |    |   |       |       |       |       |       |       |       |          |
|                                                  | ED:                                                      |        |        |      |   |    |   |       |       |       |       |       |       |       |          |
| cds.Camellia_sinensis.comp2419_8_c0_seq1_m.52314 | glutathione S-transferase L3 isoform X1 [Vitis vinifera] | 18.659 | 23.355 | 31.5 | 4 | 8  | 4 | 1.01  | 1.078 | 1.062 | 0.925 | 0.984 | 0.984 | 0.918 | 4.05E-02 |

|                                                  |                                                                                       |        |        |      |    |    |    |       |       |       |       |       |       |       |          |
|--------------------------------------------------|---------------------------------------------------------------------------------------|--------|--------|------|----|----|----|-------|-------|-------|-------|-------|-------|-------|----------|
| cds.Camellia_sinensis.comp2420_5_c0_seq1_m.43355 | PREDICTED:<br>ferredoxin-thioredoxin reductase catalytic chain, chloroplastic [Vitis] | 16.333 | 32.415 | 36.1 | 6  | 12 | 6  | 0.987 | 1.03  | 0.971 | 1.012 | 1.022 | 0.997 | 1.014 | 4.87E-01 |
| cds.Camellia_sinensis.comp2420_6_c0_seq1_m.41922 | PREDICTED:<br>CASP-like protein 1 [Sesamum indicum]                                   | 20.47  | 14.223 | 26.4 | 5  | 9  | 5  | 0.785 | 0.771 | 0.76  | 1.206 | 1.294 | 1.253 | 1.62  | 2.38E-05 |
| cds.Camellia_sinensis.comp2420_7_c0_seq1_m.26848 | PREDICTED:<br>ATP-citrate synthase alpha chain protein 2 [Vitis vinifera]             | 46.486 | 26.406 | 12.8 | 6  | 12 | 3  | 1.043 | 0.971 | 1.002 | 1.007 | 1.021 | 1.04  | 1.017 | 4.85E-01 |
| cds.Camellia_sinensis.comp2420_8_c0_seq1_m.8550  | PREDICTED:<br>DEAD-box ATP-dependent RNA helicase 37 [Vitis vinifera]                 | 66.283 | 26.201 | 23.9 | 12 | 14 | 11 | 0.936 | 0.993 | 0.962 | 1.027 | 1.042 | 1.037 | 1.074 | 1.50E-02 |

|                                                  |                                                                                      |        |        |      |    |    |   |       |       |       |       |       |       |       |          |
|--------------------------------------------------|--------------------------------------------------------------------------------------|--------|--------|------|----|----|---|-------|-------|-------|-------|-------|-------|-------|----------|
| cds.Camellia_sinensis.comp2420_9_c0_seq1_m.15120 | PREDICT<br>ED: fatty acid amide hydrolase-like<br>[Solanum tuberosum]                | 41.129 | 9.147  | 4.4  | 1  | 1  | 1 | 1.068 | 0.937 | 0.798 | 0.999 | 1.129 | 1.081 | 1.145 | 1.98E-01 |
| cds.Camellia_sinensis.comp2420_9_c0_seq1_m.15121 | PREDICT<br>ED: fatty acid amide hydrolase-like<br>[Nicotiana attenuata]              | 27.133 | 10.564 | 4.6  | 1  | 1  | 1 | 1.03  | 1.116 | 1.046 | 0.957 | 0.9   | 0.942 | 0.877 | 1.29E-02 |
| cds.Camellia_sinensis.comp2421_3_c0_seq1_m.7983  | PREDICT<br>ED: ABC transporter F family member 3<br>[Vitis vinifera]                 | 79.627 | 23.515 | 10.5 | 8  | 8  | 8 | 0.964 | 1.023 | 0.953 | 1.066 | 0.969 | 1.024 | 1.04  | 3.27E-01 |
| cds.Camellia_sinensis.comp2421_7_c0_seq2_m.21346 | PREDICT<br>ED: acyl-coenzyme A oxidase 4, peroxisomal isoform X2<br>[Vitis vinifera] | 47.726 | 56.518 | 26.1 | 11 | 16 | 2 | 0.997 | 0.905 | 0.914 | 0.987 | 1.098 | 1.118 | 1.137 | 6.09E-02 |
| cds.Camellia_sinensis.comp2423_4_c0_seq2_m.45260 | PREDICT<br>ED: EKC/KEO PS complex subunit Tprkb<br>[Jatropha curcas]                 | 18.591 | 4.9074 | 17   | 2  | 3  | 2 | 1.012 | 0.944 | 0.9   | 1.024 | 1     | 1.134 | 1.106 | 1.23E-01 |



|                                                  |                                                                                                     |        |        |      |   |   |   |       |       |       |       |       |       |       |          |
|--------------------------------------------------|-----------------------------------------------------------------------------------------------------|--------|--------|------|---|---|---|-------|-------|-------|-------|-------|-------|-------|----------|
| cds.Camellia_sinensis.comp2424_9_c0_seq1_m.39115 | PREDICTED:<br>aminoacyl tRNA synthase complex-interacting multifunctional protein 1 [Juglans regia] | 32.157 | 16.547 | 19   | 5 | 7 | 5 | 0.952 | 1.078 | 1.003 | 1.019 | 1.012 | 0.921 | 0.973 | 6.10E-01 |
| cds.Camellia_sinensis.comp2425_3_c0_seq1_m.39812 | PREDICTED:<br>probable protein phosphatase 2C 39 [Nicotiana tabacum]                                | 22.663 | 11.711 | 19.3 | 4 | 8 | 2 | 0.969 | 1.027 | 0.988 | 1.014 | 1.039 | 0.979 | 1.016 | 5.47E-01 |
| cds.Camellia_sinensis.comp2425_6_c0_seq1_m.23885 | PREDICTED:<br>GDT1-like protein 2, chloroplastic [Vitis vinifera]                                   | 30.909 | 27.167 | 10   | 2 | 4 | 2 | 1.012 | 0.938 | 0.913 | 1.014 | 1.022 | 1.053 | 1.079 | 7.98E-02 |
| cds.Camellia_sinensis.comp2426_9_c0_seq1_m.20207 | PREDICTED:<br>histone acetyltransferase type B catalytic subunit [Populus euphratica]               | 55.461 | 5.7439 | 3.1  | 1 | 1 | 1 | 0.837 | 1.028 | 0.977 | 1.053 | 0.833 | 1.301 | 1.121 | 5.15E-01 |











|                                |                                                                             |        |        |      |    |    |    |       |       |       |       |       |       |       |          |
|--------------------------------|-----------------------------------------------------------------------------|--------|--------|------|----|----|----|-------|-------|-------|-------|-------|-------|-------|----------|
| cds.Camellia_sinensis.comp2438 | PREDICT ED: apolipoprotein D [Populus euphratica]                           | 21.366 | 133.38 | 56.5 | 12 | 51 | 10 | 0.942 | 0.896 | 0.908 | 1.084 | 1.102 | 1.097 | 1.196 | 3.42E-04 |
| cds.Camellia_sinensis.comp2439 | PREDICT ED: aminoacylase-1-like [Juglans regia]                             | 53.18  | 14.995 | 18.9 | 9  | 9  | 9  | 1.055 | 1.074 | 1.042 | 0.91  | 0.956 | 0.933 | 0.883 | 1.72E-03 |
| cds.Camellia_sinensis.comp2439 | PREDICT ED: probable methyltransferase PMT2 [Fragaria vesca subsp. vesca]   | 40.978 | 1.4661 | 5    | 2  | 2  | 2  | 1.294 | 1.166 | 1.112 | 0.787 | 0.737 | 0.835 | 0.66  | 1.96E-03 |
| cds.Camellia_sinensis.comp2439 | PREDICT ED: LOW QUALITY PROTEIN: basic endochitinase [Vitis vinifera]       | 36.672 | 21.069 | 4.1  | 1  | 1  | 1  | 0.826 | 0.854 | 0.872 | 1.105 | 1.272 | 1.132 | 1.375 | 2.38E-03 |
| cds.Camellia_sinensis.comp2440 | PREDICT ED: ER membrane protein complex subunit 7 homolog [Theobroma cacao] | 23.115 | 4.7878 | 11.4 | 2  | 3  | 2  | 0.95  | 1.073 | 0.976 | 1.104 | 0.94  | 0.976 | 1.007 | 9.27E-01 |

|                                                  |                                                                                                                     |        |        |      |   |    |   |       |       |       |       |       |       |       |          |
|--------------------------------------------------|---------------------------------------------------------------------------------------------------------------------|--------|--------|------|---|----|---|-------|-------|-------|-------|-------|-------|-------|----------|
| cds.Camellia_sinensis.comp2441_1_c0_seq1_m.4822  | PREDICTED: ER membrane protein complex subunit 1 isoform X2<br>[Theobroma cacao]                                    | 57.181 | 39.598 | 16   | 7 | 11 | 7 | 0.954 | 0.965 | 0.93  | 1.092 | 1.042 | 1.046 | 1.116 | 4.10E-03 |
| cds.Camellia_sinensis.comp2441_1_c0_seq1_m.4823  | PREDICTED: ER membrane protein complex subunit 1<br>[Jatropha curcas]                                               | 54.821 | 30.399 | 18.2 | 7 | 12 | 7 | 0.942 | 0.953 | 1.009 | 1.041 | 1.052 | 1.017 | 1.071 | 4.26E-02 |
| cds.Camellia_sinensis.comp2441_2_c0_seq2_m.45149 | histone H2A variant 1<br>[Ananas comosus]                                                                           | 18.569 | 10.066 | 20.5 | 4 | 8  | 3 | 1.096 | 1.131 | 1.175 | 0.896 | 0.838 | 0.84  | 0.757 | 7.21E-04 |
| cds.Camellia_sinensis.comp2441_3_c0_seq3_m.43397 | PREDICTED: putative phosphatidylglycerol/ phosphatidylinositol transfer protein<br>DDB_G0282179<br>[Vitis vinifera] | 21.198 | 28.096 | 25.3 | 5 | 14 | 5 | 1.01  | 0.987 | 1.018 | 1.001 | 0.985 | 1.007 | 0.993 | 5.57E-01 |

|                                |                                                                                                                       |        |        |      |    |    |    |       |       |       |       |       |       |       |          |
|--------------------------------|-----------------------------------------------------------------------------------------------------------------------|--------|--------|------|----|----|----|-------|-------|-------|-------|-------|-------|-------|----------|
| cds.Camellia_sinensis.comp2442 | PREDICTED: protein SUPPRESSOR OF G 3 [Vitis vinifera] Leucine-rich repeat (LRR) family protein [Arabidopsis thaliana] | 73.283 | 35.512 | 14.4 | 9  | 10 | 9  | 1.125 | 1.127 | 1.177 | 0.849 | 0.871 | 0.817 | 0.74  | 2.21E-04 |
| cds.Camellia_sinensis.comp2443 | PREDICTED: ATP synthase gamma chain, chloroplastic [Nelumbo nucifera]                                                 | 49.839 | 5.4427 | 10.3 | 4  | 5  | 4  |       |       |       |       |       |       |       |          |
| cds.Camellia_sinensis.comp2444 | PREDICTED: 30S ribosomal protein S9, chloroplastic-like [Nelumbo nucifera]                                            | 41.352 | 259.9  | 41.3 | 17 | 65 | 15 | 1.016 | 0.977 | 0.966 | 1.028 | 1.017 | 1.019 | 1.035 | 8.83E-02 |
| cds.Camellia_sinensis.comp2444 | PREDICTED: 30S ribosomal protein S9, chloroplastic-like [Nelumbo nucifera]                                            | 22.414 | 6.9776 | 14.5 | 3  | 4  | 3  | 1.162 | 1.171 | 1.17  | 0.787 | 0.83  | 0.798 | 0.689 | 1.88E-03 |

|                                                  |                                                             |        |        |      |   |    |   |       |       |       |       |       |       |       |          |
|--------------------------------------------------|-------------------------------------------------------------|--------|--------|------|---|----|---|-------|-------|-------|-------|-------|-------|-------|----------|
|                                                  | PREDICT                                                     |        |        |      |   |    |   |       |       |       |       |       |       |       |          |
|                                                  | ED:                                                         |        |        |      |   |    |   |       |       |       |       |       |       |       |          |
| cds.Camellia_sinensis.comp2445_2_c0_seq2_m.45813 | histone-lysine N-methyltransferase setd3 [Nelumbo nucifera] | 26.399 | 1.3065 | 5.4  | 1 | 1  | 1 |       |       |       |       |       |       |       |          |
|                                                  | PREDICT                                                     |        |        |      |   |    |   |       |       |       |       |       |       |       |          |
|                                                  | ED:                                                         |        |        |      |   |    |   |       |       |       |       |       |       |       |          |
| cds.Camellia_sinensis.comp2446_0_c0_seq1_m.6305  | isoamylase 2, chloroplastic [Juglans regia]                 | 96.791 | 8.0471 | 5.9  | 5 | 5  | 5 | 1.01  | 1.016 | 1.025 | 0.949 | 0.989 | 0.969 | 0.953 | 1.87E-02 |
|                                                  | PREDICT                                                     |        |        |      |   |    |   |       |       |       |       |       |       |       |          |
|                                                  | ED:                                                         |        |        |      |   |    |   |       |       |       |       |       |       |       |          |
| cds.Camellia_sinensis.comp2446_5_c0_seq1_m.43939 | histone deacetylase complex subunit SAP18 [Sesamum indicum] | 18.517 | 6.1553 | 15.2 | 3 | 7  | 3 | 1.005 | 1     | 0.966 | 1     | 1.042 | 1.01  | 1.027 | 2.00E-01 |
|                                                  | PREDICT                                                     |        |        |      |   |    |   |       |       |       |       |       |       |       |          |
|                                                  | ED:                                                         |        |        |      |   |    |   |       |       |       |       |       |       |       |          |
| cds.Camellia_sinensis.comp2447_1_c0_seq1_m.35807 | REF/SRPP-like protein At1g67360 [Nicotiana                  | 28.646 | 37.627 | 28.5 | 6 | 10 | 6 | 0.915 | 0.878 | 0.892 | 1.106 | 1.092 | 1.106 | 1.231 | 8.17E-05 |

|                                                  |                                                                     |        |        |      |   |    |   |       |       |       |       |       |       |       |          |
|--------------------------------------------------|---------------------------------------------------------------------|--------|--------|------|---|----|---|-------|-------|-------|-------|-------|-------|-------|----------|
|                                                  | PREDICT<br>ED:                                                      |        |        |      |   |    |   |       |       |       |       |       |       |       |          |
| cds.Camellia_sinensis.comp2448_2_c0_seq1_m.56983 | guanylate-binding protein 7 isoform X2 [Ziziphus jujuba]            | 13.418 | 1.8617 | 19.3 | 3 | 3  | 1 | 0.955 | 1.088 | 1.011 | 1.011 | 0.91  | 1.034 | 0.968 | 5.77E-01 |
|                                                  | PREDICT<br>ED: 50S                                                  |        |        |      |   |    |   |       |       |       |       |       |       |       |          |
| cds.Camellia_sinensis.comp2449_7_c0_seq1_m.37976 | ribosomal protein L9, chloroplast ic [Daucus carota subsp. sativus] | 23.954 | 10.995 | 24.6 | 6 | 8  | 6 | 1.073 | 1.061 | 1.102 | 0.881 | 0.884 | 0.94  | 0.836 | 1.68E-03 |
|                                                  | PREDICT<br>ED:                                                      |        |        |      |   |    |   |       |       |       |       |       |       |       |          |
| cds.Camellia_sinensis.comp2449_8_c0_seq3_m.31193 | phosphoserine phosphatase, chloroplast ic [Vitis vinifera]          | 32.001 | 66.03  | 32.9 | 8 | 15 | 8 | 1.004 | 1.077 | 1.107 | 0.942 | 0.942 | 0.952 | 0.89  | 5.81E-02 |
|                                                  | PREDICT<br>ED:                                                      |        |        |      |   |    |   |       |       |       |       |       |       |       |          |
| cds.Camellia_sinensis.comp2451_5_c0_seq2_m.18878 | scarecrow-like protein 21 [Juglans regia]                           | 59.071 | 1.6917 | 1.7  | 1 | 1  | 1 |       |       |       |       |       |       |       |          |
| cds.Camellia_sinensis.comp2452_6_c0_seq2_m.10718 | DUF639 family protein [Medicago truncatula]                         | 61.831 | -2     | 1.3  | 1 | 1  | 1 | 1.092 | 0.849 | 1.006 | 0.931 | 1.088 | 1.035 | 1.036 | 6.78E-01 |

|                                                 |                                                                                                                                                 |        |        |      |   |    |   |       |       |       |       |       |       |       |          |
|-------------------------------------------------|-------------------------------------------------------------------------------------------------------------------------------------------------|--------|--------|------|---|----|---|-------|-------|-------|-------|-------|-------|-------|----------|
| cds.Camellia_sinensis.comp24527_c0_seq1_m.54512 | palmitoyl-protein thioesterase 1-like [Cajanus cajan] NADH-plastoquinone                                                                        | 15.457 | 17.119 | 33.8 | 3 | 5  | 3 | 1.068 | 1.056 | 1.053 | 0.917 | 0.995 | 0.947 | 0.9   | 1.18E-02 |
| cds.Camellia_sinensis.comp24528_c0_seq1_m.3142  | oxidoreductase subunit K (chloroplast) [Camellia pubicosta] NADH-plastoquinone                                                                  | 32.237 | 48.051 | 12.4 | 3 | 5  | 3 | 0.919 | 0.963 | 0.97  | 1.026 | 0.988 | 1.059 | 1.077 | 4.69E-02 |
| cds.Camellia_sinensis.comp24528_c0_seq1_m.3143  | oxidoreductase subunit J (chloroplast) [Camellia crapnelliana] PREDICTED: activator of 90 kDa heat shock protein ATPase homolog [Juglans regia] | 18.603 | 14.93  | 22.2 | 3 | 6  | 3 | 0.945 | 0.991 | 0.969 | 0.994 | 1.062 | 1.068 | 1.075 | 5.43E-02 |
| cds.Camellia_sinensis.comp24531_c1_seq1_m.29838 | activator of 90 kDa heat shock protein ATPase homolog [Juglans regia]                                                                           | 39.988 | 69.611 | 24.1 | 8 | 14 | 8 | 1.033 | 1.023 | 1.024 | 0.93  | 0.987 | 0.985 | 0.942 | 9.36E-02 |





|                                                 |                                                                           |        |        |      |    |    |    |       |       |       |       |       |       |       |          |
|-------------------------------------------------|---------------------------------------------------------------------------|--------|--------|------|----|----|----|-------|-------|-------|-------|-------|-------|-------|----------|
| cds.Camellia_sinensis.comp24560_c0_seq1_m.30511 | PREDICT<br>ED: high mobility group B protein 1-like<br>[Nelumbo nucifera] | 19.386 | 3.8063 | 13.2 | 3  | 5  | 3  | 0.995 | 0.99  | 0.988 | 0.996 | 0.98  | 1.029 | 1.011 | 5.44E-01 |
| cds.Camellia_sinensis.comp24563_c0_seq1_m.34737 | PREDICT<br>ED: proteasome subunit alpha type-1-B<br>[Sesamum indicum]     | 30.23  | 110.66 | 48.7 | 13 | 29 | 13 | 0.983 | 0.972 | 0.967 | 1.024 | 1.031 | 1.04  | 1.059 | 9.58E-04 |
| cds.Camellia_sinensis.comp24569_c0_seq1_m.41022 | Ran-binding protein 1-b-like<br>[Morus notabilis]                         | 25.916 | 22.214 | 20.2 | 5  | 9  | 3  | 1.098 | 1.084 | 1.033 | 0.898 | 0.921 | 0.905 | 0.847 | 1.18E-03 |
| cds.Camellia_sinensis.comp24569_c0_seq2_m.50549 | Ran-binding protein 1-b-like<br>[Morus notabilis]                         | 20.64  | -2     | 28.3 | 4  | 6  | 1  |       |       |       |       |       |       |       |          |
| cds.Camellia_sinensis.comp24570_c0_seq1_m.46922 | PREDICT<br>ED: S-adenosylmethionine synthase 5<br>[Prunus mume]           | 15.734 | -2     | 31.2 | 4  | 11 | 1  | 1.165 | 1.143 | 1.073 | 0.821 | 0.9   | 0.858 | 0.763 | 1.74E-03 |

|                                |                                                                                                               |        |        |      |   |    |   |       |       |       |       |       |       |       |          |
|--------------------------------|---------------------------------------------------------------------------------------------------------------|--------|--------|------|---|----|---|-------|-------|-------|-------|-------|-------|-------|----------|
| cds.Camellia_sinensis.comp2457 | PREDICT<br>ED: stress enhanced protein 2, chloroplastic [Vitis vinifera]                                      | 20.571 | 5.1062 | 6.9  | 1 | 2  | 1 | 1.031 | 1.032 | 1.05  | 0.969 | 0.924 | 0.992 | 0.927 | 2.44E-02 |
| cds.Camellia_sinensis.comp2457 | PREDICT<br>ED: aquaporin TIP2-1 [Theobroma cacao]                                                             | 27.788 | 13.581 | 4.1  | 1 | 5  | 1 | 0.984 | 0.957 | 1.038 | 1.018 | 1.008 | 0.966 | 1.004 | 8.79E-01 |
| cds.Camellia_sinensis.comp2459 | PREDICT<br>ED: fructose-bisphosphate aldolase-lysine N-methyltransferase, chloroplastic [Gossypium raimondii] | 35.355 | 82.904 | 29.7 | 7 | 14 | 7 | 0.999 | 0.994 | 0.91  | 1.051 | 1.011 | 1.05  | 1.072 | 9.95E-02 |
| cds.Camellia_sinensis.comp2461 | PREDICT<br>ED: probable purple acid phosphatase 20 [Nicotiana tomentosiformis]                                | 47.727 | 6.0496 | 4.7  | 2 | 2  | 2 | 0.858 | 0.818 | 0.778 | 1.242 | 1.167 | 1.204 | 1.472 | 3.20E-04 |

|                                |                                                                                                          |        |      |   |   |   |       |       |       |       |       |       |       |          |
|--------------------------------|----------------------------------------------------------------------------------------------------------|--------|------|---|---|---|-------|-------|-------|-------|-------|-------|-------|----------|
| cds.Camellia_sinensis.comp2461 | 51.183                                                                                                   | -2     | 3.1  | 1 | 1 | 1 | 0.818 | 0.982 | 1.062 | 1.109 | 1.148 | 0.93  | 1.114 | 3.41E-01 |
| 5_c0_seq1_m.20658              | PREDICTED:<br>pentatricopeptide repeat-containing protein At1g08070,<br>chloroplastic [Ricinus communis] |        |      |   |   |   |       |       |       |       |       |       |       |          |
| cds.Camellia_sinensis.comp2461 | 58.206                                                                                                   | 5.288  | 3.9  | 3 | 3 | 3 | 1.101 | 1.114 | 1.069 | 0.928 | 0.867 | 0.899 | 0.82  | 1.02E-03 |
| 8_c0_seq1_m.22659              | PREDICTED: acyl-coenzyme A thioesterase 9,<br>mitochondrial [Ricinus communis]                           |        |      |   |   |   |       |       |       |       |       |       |       |          |
| cds.Camellia_sinensis.comp2462 | 16.488                                                                                                   | 8.0107 | 17.4 | 3 | 4 | 3 | 0.93  | 0.946 | 0.981 | 1.036 | 1.058 | 1.056 | 1.103 | 4.64E-03 |
| 0_c0_seq1_m.39124              | PREDICTED: ELAV-like protein 4 [Capsicum annuum]                                                         |        |      |   |   |   |       |       |       |       |       |       |       |          |
| cds.Camellia_sinensis.comp2463 | 81.53                                                                                                    | 12.217 | 1.9  | 1 | 4 | 1 | 0.975 | 1.027 | 1.047 | 0.964 | 1.026 | 0.967 | 0.97  | 3.57E-01 |
| 7_c0_seq1_m.8160               | PREDICTED: subtilisin-like protease SBT1.7 [Theobroma cacao]                                             |        |      |   |   |   |       |       |       |       |       |       |       |          |



|                                |                                                                         |        |        |      |    |    |   |       |       |       |       |       |       |       |          |
|--------------------------------|-------------------------------------------------------------------------|--------|--------|------|----|----|---|-------|-------|-------|-------|-------|-------|-------|----------|
| cds.Camellia_sinensis.comp2467 | PREDICT<br>ED: malate dehydrogenase, glyoxysomal [Vitis vinifera]       | 38.02  | 120.06 | 36.8 | 11 | 36 | 6 | 1.007 | 1.015 | 1.017 | 1.008 | 0.979 | 1.01  | 0.986 | 2.54E-01 |
| cds.Camellia_sinensis.comp2468 | PREDICT<br>ED: developmentally-regulated G-protein 3 [Arachis ipaensis] | 41.255 | 4.0422 | 6    | 2  | 3  | 2 |       |       |       |       |       |       |       |          |
| cds.Camellia_sinensis.comp2469 | PREDICT<br>ED: peptide deformylase 1A, chloroplastic [Nelumbo nucifera] | 31.64  | 20.343 | 21.1 | 6  | 10 | 6 | 0.999 | 1.034 | 1.01  | 0.99  | 0.997 | 1.004 | 0.983 | 1.92E-01 |
| cds.Camellia_sinensis.comp2469 | PREDICT<br>ED: ABC transporter I family member 17 [Citrus sinensis]     | 31.094 | 15.69  | 25   | 6  | 7  | 6 | 1.011 | 1.059 | 1.068 | 0.907 | 0.946 | 0.954 | 0.895 | 8.54E-03 |



|                                                  |                                                                                   |        |        |      |   |   |   |       |       |       |       |       |       |       |          |
|--------------------------------------------------|-----------------------------------------------------------------------------------|--------|--------|------|---|---|---|-------|-------|-------|-------|-------|-------|-------|----------|
|                                                  | PREDICT<br>ED:                                                                    |        |        |      |   |   |   |       |       |       |       |       |       |       |          |
| cds.Camellia_sinensis.comp2471_4_c0_seq1_m.50851 | superoxide dismutase [Cu-Zn], chloroplastic [Ziziphus jujuba]                     | 16.015 | 46.255 | 24.2 | 3 | 7 | 2 | 0.914 | 0.901 | 0.887 | 1.087 | 1.112 | 1.129 | 1.232 | 1.20E-04 |
|                                                  | PREDICT<br>ED: 50S ribosomal protein L31, chloroplastic [Vitis vinifera]          |        |        |      |   |   |   |       |       |       |       |       |       |       |          |
| cds.Camellia_sinensis.comp2472_9_c0_seq1_m.48307 | protein L31, chloroplastic [Vitis vinifera]                                       | 15.72  | 8.7437 | 8.6  | 1 | 2 | 1 | 1.267 | 1.176 | 1.112 | 0.759 | 0.825 | 0.797 | 0.67  | 8.78E-04 |
|                                                  | PREDICT<br>ED:                                                                    |        |        |      |   |   |   |       |       |       |       |       |       |       |          |
| cds.Camellia_sinensis.comp2473_2_c0_seq1_m.20638 | ankyrin-1 [Theobroma cacao]                                                       | 49.125 | 25.226 | 8.3  | 3 | 4 | 3 | 0.97  | 1.004 | 0.992 | 1.072 | 0.989 | 0.991 | 1.029 | 3.80E-01 |
|                                                  | PREDICT<br>ED:                                                                    |        |        |      |   |   |   |       |       |       |       |       |       |       |          |
| cds.Camellia_sinensis.comp2476_2_c0_seq1_m.20309 | pentatricopeptide repeat-containing protein At1g60770 isoform X1 [Vitis vinifera] | 56.417 | 1.8303 | 1.8  | 1 | 1 | 1 | 1.029 | 1.195 | 1.103 | 0.876 | 0.898 | 0.878 | 0.797 | 6.88E-03 |



|                                |                                                                                      |        |        |      |   |    |   |       |       |       |       |       |       |       |          |
|--------------------------------|--------------------------------------------------------------------------------------|--------|--------|------|---|----|---|-------|-------|-------|-------|-------|-------|-------|----------|
| cds.Camellia_sinensis.comp2476 | PREDICT<br>ED: 2-hydroxyisoflavanone dehydratase-like<br>[Juglans regia]             | 36.259 | 45.113 | 23.2 | 8 | 15 | 8 | 1.104 | 1.077 | 1.072 | 0.899 | 0.892 | 0.891 | 0.824 | 3.77E-05 |
| cds.Camellia_sinensis.comp2477 | PREDICT<br>ED: V-type proton ATPase subunit E-like<br>[Nelumbo]                      | 26.154 | -2     | 18.3 | 4 | 6  | 1 |       |       |       |       |       |       |       |          |
| cds.Camellia_sinensis.comp2479 | PREDICT<br>ED:<br>thiosulfate sulfurtransferase 18 isoform X2<br>[Solanum tuberosum] | 18.216 | 1.5694 | 6.1  | 1 | 2  | 1 |       |       |       |       |       |       |       |          |
| cds.Camellia_sinensis.comp2479 | PREDICT<br>ED:<br>malignant T-cell-amplified sequence 1 homolog<br>[Vitis vinifera]  | 20.114 | 38.701 | 23.2 | 4 | 4  | 4 | 1.005 | 1.05  | 0.931 | 1.013 | 1.001 | 1.007 | 1.012 | 7.50E-01 |



|                                                  |                                                                                   |        |        |      |    |    |    |       |       |       |       |       |       |       |          |
|--------------------------------------------------|-----------------------------------------------------------------------------------|--------|--------|------|----|----|----|-------|-------|-------|-------|-------|-------|-------|----------|
| cds.Camellia_sinensis.comp2481_5_c0_seq1_m.38451 | PREDICT<br>ED: sm-like protein<br>LSM1B [Ziziphus jujuba]                         | 14.502 | 1.6751 | 12.5 | 1  | 1  | 1  | 0.876 | 1.278 | 1.054 | 1.151 | 0.925 | 0.738 | 0.877 | 4.66E-01 |
| cds.Camellia_sinensis.comp2481_8_c0_seq1_m.28200 | PREDICT<br>ED: phenylalanine ammoniolyase 1 [Daucus carota subsp. sativus]        | 45.753 | 19.992 | 40.3 | 16 | 32 | 7  | 1.376 | 1.315 | 1.268 | 0.616 | 0.661 | 0.625 | 0.48  | 2.07E-05 |
| cds.Camellia_sinensis.comp2482_0_c0_seq1_m.37845 | PREDICT<br>ED: expansin-like A2 [Ricinus communis]                                | 16.401 | 18.858 | 37.2 | 6  | 13 | 6  | 0.795 | 0.877 | 0.785 | 1.213 | 1.189 | 1.19  | 1.462 | 4.37E-04 |
| cds.Camellia_sinensis.comp2482_3_c0_seq2_m.39697 | PREDICT<br>ED: surfeit locus protein 1 isoform X1 [Theobroma cacao]               | 27.913 | 5.6172 | 8.4  | 1  | 1  | 1  | 0.94  | 1.094 | 1.075 | 1.003 | 0.946 | 0.952 | 0.933 | 2.60E-01 |
| cds.Camellia_sinensis.comp2482_7_c1_seq1_m.11253 | PREDICT<br>ED: outer envelope protein 80, chloroplastic-like [Gossypium hirsutum] | 74.32  | 60.844 | 20.8 | 15 | 21 | 15 | 0.977 | 0.983 | 0.986 | 1.035 | 1.049 | 1.022 | 1.054 | 2.72E-03 |

|                                                  |                                                                                                |        |        |      |    |    |    |       |       |       |       |       |       |       |          |
|--------------------------------------------------|------------------------------------------------------------------------------------------------|--------|--------|------|----|----|----|-------|-------|-------|-------|-------|-------|-------|----------|
| cds.Camellia_sinensis.comp2483_4_c0_seq1_m.22223 | PREDICT<br>ED: 30S<br>ribosomal<br>protein S1,<br>chloroplast<br>ic<br>[Nelumbo<br>nucifera]   | 44.723 | 86.905 | 30.7 | 12 | 36 | 12 | 1.022 | 1.003 | 1.026 | 0.974 | 0.979 | 0.981 | 0.962 | 5.92E-03 |
| cds.Camellia_sinensis.comp2483_6_c0_seq1_m.42562 | PREDICT<br>ED:<br>protein<br>translation<br>factor<br>SUI1<br>homolog<br>[Nelumbo<br>nucifera] | 11.503 | 2.1725 | 8.8  | 1  | 1  | 1  | 1.004 | 0.985 | 0.998 | 0.965 | 1.068 | 0.989 | 1.012 | 7.47E-01 |
| cds.Camellia_sinensis.comp2483_9_c0_seq2_m.23278 | PREDICT<br>ED: thiol-<br>disulfide<br>oxidoreduc<br>tase<br>LTO1-like<br>[Juglans<br>regia]    | 36.864 | 2.5888 | 3.8  | 1  | 1  | 1  |       |       |       |       |       |       |       |          |
| cds.Camellia_sinensis.comp2485_1_c0_seq1_m.28271 | PREDICT<br>ED: 40S<br>ribosomal<br>protein<br>S18<br>[Erythranthe guttata]                     | 17.698 | 121.85 | 50   | 7  | 15 | 7  | 1.128 | 1.127 | 1.147 | 0.82  | 0.861 | 0.833 | 0.739 | 4.01E-05 |
| cds.Camellia_sinensis.comp2486_4_c0_seq1_m.40533 |                                                                                                | 19.3   | 7.8641 | 11   | 2  | 4  | 2  | 1.148 | 1.107 | 1.083 | 0.881 | 0.869 | 0.88  | 0.788 | 1.76E-04 |

|                                |                                                                            |        |        |      |    |    |   |       |       |       |       |       |       |       |          |
|--------------------------------|----------------------------------------------------------------------------|--------|--------|------|----|----|---|-------|-------|-------|-------|-------|-------|-------|----------|
| cds.Camellia_sinensis.comp2486 | PREDICT ED: pyridoxal reductase, chloroplastic isoform X2 [Vitis vinifera] | 42.971 | 56.826 | 13.5 | 4  | 8  | 4 | 0.934 | 0.961 | 1.011 | 1.024 | 1.048 | 1.041 | 1.071 | 4.56E-02 |
| cds.Camellia_sinensis.comp2487 | PREDICT ED: 60S ribosomal protein L4 [Ziziphus jujuba]                     | 44.76  | 78.066 | 38   | 13 | 22 | 8 | 1.125 | 1.15  | 1.145 | 0.848 | 0.853 | 0.857 | 0.748 | 1.25E-06 |
| cds.Camellia_sinensis.comp2487 | PREDICT ED: probable carboxylase 2 [Vitis vinifera]                        | 12.678 | 4.7303 | 25.8 | 3  | 5  | 2 | 0.929 | 0.932 | 0.946 | 1.031 | 1.147 | 1.047 | 1.149 | 1.51E-02 |
| cds.Camellia_sinensis.comp2488 | PREDICT ED: aquaporin PIP1-3 [Theobroma cacao]                             | 15.394 | 5.476  | 19.9 | 2  | 2  | 2 | 0.943 | 0.949 | 0.904 | 1.123 | 1.049 | 1.066 | 1.158 | 4.62E-03 |
| cds.Camellia_sinensis.comp2488 | PREDICT ED: aspartic proteinase nepenthesisin-1 [Sesamum indicum]          | 46.761 | 37.286 | 11.7 | 4  | 8  | 4 | 0.984 | 0.92  | 0.979 | 1.092 | 1.065 | 1.054 | 1.114 | 1.08E-02 |



|                                                  |                                                                                |        |        |      |   |    |   |       |       |       |       |       |       |       |          |
|--------------------------------------------------|--------------------------------------------------------------------------------|--------|--------|------|---|----|---|-------|-------|-------|-------|-------|-------|-------|----------|
|                                                  | PREDICT<br>ED: 40S                                                             |        |        |      |   |    |   |       |       |       |       |       |       |       |          |
| cds.Camellia_sinensis.comp2491_1_c0_seq1_m.38588 | ribosomal protein S11-like [Daucus carota subsp. sativus]                      | 17.858 | 12.377 | 35.2 | 7 | 8  | 7 | 1.2   | 1.215 | 1.197 | 0.766 | 0.767 | 0.774 | 0.639 | 7.59E-08 |
|                                                  | PREDICT<br>ED: ATP synthase subunit b', chloroplastic                          |        |        |      |   |    |   |       |       |       |       |       |       |       |          |
| cds.Camellia_sinensis.comp2491_7_c0_seq1_m.41745 | [Theobroma cacao] Translation machinery associated TMA7 [Arabidopsis thaliana] | 24.011 | 64.13  | 36.2 | 8 | 42 | 8 | 1.003 | 0.995 | 0.976 | 1.006 | 1.005 | 1.046 | 1.028 | 1.51E-01 |
| cds.Camellia_sinensis.comp2492_6_c0_seq1_m.49132 |                                                                                | 11.151 | 2.0296 | 11.8 | 1 | 2  | 1 | 0.988 | 1.052 | 1.043 | 0.986 | 1.04  | 0.899 | 0.949 | 3.13E-01 |
|                                                  | PREDICT<br>ED: 17.3 kDa class II heat shock protein-like                       |        |        |      |   |    |   |       |       |       |       |       |       |       |          |
| cds.Camellia_sinensis.comp2493_2_c0_seq1_m.38826 | [Nicotiana attenuata]                                                          | 18.083 | 62.033 | 48.8 | 5 | 15 | 5 | 1.028 | 1.046 | 0.97  | 0.96  | 1.016 | 0.983 | 0.972 | 3.75E-01 |





|                                |                   |                                                                                                                                           |        |        |      |    |    |    |       |       |       |       |       |       |       |          |
|--------------------------------|-------------------|-------------------------------------------------------------------------------------------------------------------------------------------|--------|--------|------|----|----|----|-------|-------|-------|-------|-------|-------|-------|----------|
| cds.Camellia_sinensis.comp2495 | 8_c0_seq1_m.31985 | PREDICTED: ribulose biphosphate small chain, chloroplastic isoform X1 [Juglans regia] BTB/POZ domain-containing protein [Morus notabilis] | 20.359 | 132.75 | 61.5 | 14 | 95 | 10 | 1.042 | 1.151 | 1.169 | 0.88  | 0.876 | 0.857 | 0.777 | 2.46E-03 |
| cds.Camellia_sinensis.comp2498 | 3_c0_seq1_m.16904 | PREDICTED: probable aquaporin PIP-type 7a [Gossypium raimondii]                                                                           | 63.368 | 6.9201 | 5.5  | 3  | 3  | 2  | 0.772 | 0.994 | 1.05  | 1.161 | 1.159 | 0.923 | 1.152 | 3.01E-01 |
| cds.Camellia_sinensis.comp2499 | 2_c0_seq1_m.29544 | PREDICTED: histone H4-like [Zea mays]                                                                                                     | 31.672 | 3.8657 | 8.8  | 3  | 3  | 3  | 1.019 | 0.969 | 1.049 | 0.996 | 1.026 | 0.97  | 0.985 | 6.32E-01 |
| cds.Camellia_sinensis.comp2500 | 4_c0_seq2_m.48898 | PREDICTED: ED: 40S ribosomal protein S27-2-like [Nelumbo nucifera]                                                                        | 11.409 | 80.118 | 58.3 | 7  | 40 | 7  | 1.105 | 1.078 | 1.089 | 0.875 | 0.898 | 0.858 | 0.804 | 1.35E-04 |
| cds.Camellia_sinensis.comp2501 | 7_c0_seq1_m.47244 |                                                                                                                                           | 14.794 | 5.6452 | 15.9 | 2  | 6  | 2  | 0.991 | 0.951 | 1.024 | 0.997 | 1.017 | 0.988 | 1.012 | 6.18E-01 |

|                                                  |                                                                |        |        |      |    |    |   |       |       |       |       |       |       |       |          |
|--------------------------------------------------|----------------------------------------------------------------|--------|--------|------|----|----|---|-------|-------|-------|-------|-------|-------|-------|----------|
| cds.Camellia_sinensis.comp2501_9_c0_seq1_m.18730 | PREDICTED: beta-glucosidase 12 [Vitis vinifera] selenocysteine | 57.105 | 33.283 | 17.6 | 10 | 17 | 9 | 1.054 | 0.987 | 0.993 | 0.957 | 1.019 | 0.964 | 0.969 | 3.37E-01 |
| cds.Camellia_sinensis.comp2503_1_c0_seq2_m.30005 | methyltransferase family protein [Populus trichocarpa]         | 37.444 | 4.5281 | 10.2 | 4  | 4  | 4 | 0.958 | 0.951 | 0.993 | 1.027 | 1.06  | 1.033 | 1.075 | 1.18E-02 |
| cds.Camellia_sinensis.comp2503_4_c0_seq2_m.32478 | peroxidase 1, cytosolic isoform X2 [Phoenix dactylifera]       | 27.549 | 64.454 | 41.6 | 9  | 46 | 9 | 1.003 | 1.001 | 1.026 | 0.982 | 1.005 | 1.002 | 0.986 | 2.74E-01 |
| cds.Camellia_sinensis.comp2503_5_c0_seq1_m.34370 | photosystem II 22 kDa protein, chloroplastic [Vitis vinifera]  | 28.292 | 96.184 | 29.2 | 7  | 25 | 5 | 1.031 | 1.045 | 1.029 | 0.963 | 0.976 | 0.962 | 0.934 | 5.39E-04 |



|                                |                                                                                                              |        |        |      |   |   |   |       |       |       |       |       |       |       |          |
|--------------------------------|--------------------------------------------------------------------------------------------------------------|--------|--------|------|---|---|---|-------|-------|-------|-------|-------|-------|-------|----------|
| cds.Camellia_sinensis.comp2508 | PREDICT<br>ED: signal<br>peptidase<br>complex<br>catalytic<br>subunit<br>SEC11A-<br>like<br>[Glycine<br>max] | 22.599 | 6.3722 | 5.4  | 1 | 1 | 1 | 0.948 | 0.986 | 1.004 | 1.077 | 0.993 | 1.014 | 1.05  | 1.80E-01 |
| cds.Camellia_sinensis.comp2508 | PREDICT<br>ED: 60S<br>ribosomal<br>protein<br>L22-2-like<br>[Ziziphus<br>jujuba]                             | 13.995 | 24.424 | 25.8 | 3 | 4 | 3 | 1.024 | 1.122 | 1.104 | 0.916 | 0.871 | 0.879 | 0.82  | 3.56E-03 |
| cds.Camellia_sinensis.comp2509 | PREDICT<br>ED: 60S<br>ribosomal<br>protein<br>L36-2<br>[Eucalyptus<br>grandis]                               | 12.443 | 2.8655 | 9.1  | 1 | 2 | 1 | 1.009 | 1.037 | 1.068 | 0.909 | 0.962 | 1.011 | 0.925 | 8.84E-02 |
| cds.Camellia_sinensis.comp2510 | tubulin<br>alpha-6<br>chain,<br>putative<br>[Medicago<br>truncatula]                                         | 24.424 | 4.2641 | 8.8  | 2 | 2 | 2 | 1.055 | 1.028 | 0.979 | 0.919 | 0.961 | 1.052 | 0.958 | 3.83E-01 |











|                                |                   |                                                                                                                       |        |        |      |   |    |   |       |       |       |       |       |       |       |          |
|--------------------------------|-------------------|-----------------------------------------------------------------------------------------------------------------------|--------|--------|------|---|----|---|-------|-------|-------|-------|-------|-------|-------|----------|
| cds.Camellia_sinensis.comp2525 | 0_c0_seq1_m.27012 | PREDICT<br>ED: stress-induced-phosphoprotein 1<br>[Gossypium hirsutum]                                                | 13.865 | 1.5886 | 7.9  | 1 | 1  | 1 |       |       |       |       |       |       |       |          |
| cds.Camellia_sinensis.comp2527 | 0_c0_seq1_m.513   | PREDICT<br>ED: dnaJ homolog subfamily C GRV2 isoform X2<br>[Prunus]                                                   | 244.54 | 25.411 | 4.1  | 7 | 7  | 7 | 0.93  | 1     | 1.019 | 1.013 | 0.963 | 1.022 | 1.017 | 6.40E-01 |
| cds.Camellia_sinensis.comp2527 | 1_c1_seq1_m.35482 | PREDICT<br>ED: heterodimeric geranylgeranyl pyrophosphatase small subunit, chloroplastic-like<br>[Populus euphratica] | 37.437 | 35.722 | 22.8 | 8 | 11 | 8 | 1.037 | 1.058 | 1.076 | 0.93  | 0.947 | 0.952 | 0.892 | 8.79E-04 |
| cds.Camellia_sinensis.comp2527 | 6_c0_seq1_m.33734 | PREDICT<br>ED: dihydroflavonol 4-reductase-like<br>[Vitis vinifera]                                                   | 38.478 | 14.842 | 9.9  | 3 | 4  | 3 | 0.931 | 1.011 | 0.957 | 1.063 | 1.056 | 0.982 | 1.07  | 1.28E-01 |

|                                                 |                                                                                                                                               |        |        |      |   |   |   |       |       |       |       |       |       |       |          |
|-------------------------------------------------|-----------------------------------------------------------------------------------------------------------------------------------------------|--------|--------|------|---|---|---|-------|-------|-------|-------|-------|-------|-------|----------|
| cds.Camellia_sinensis.comp25284_c0_seq1_m.47591 | Dihydrolipoyl dehydrogenase [Morus notabilis] PREDICTED: probable non-specific lipid-transfer protein AKCS9 [Fragaria vesca subsp. vesca] 50S | 12.205 | 6.3063 | 36   | 3 | 5 | 2 | 1.032 | 0.959 | 0.993 | 1.055 | 0.902 | 1.067 | 1.013 | 8.61E-01 |
| cds.Camellia_sinensis.comp25296_c0_seq1_m.51429 | ribosomal protein L34 [Arabidopsis thaliana] PREDICTED: 50S ribosomal protein L29, chloroplastic [Gossypium raimondii]                        | 13.126 | 3.9386 | 19.2 | 2 | 2 | 2 | 0.925 | 0.955 | 0.92  | 1.14  | 1.022 | 1.073 | 1.155 | 1.30E-02 |
| cds.Camellia_sinensis.comp25299_c0_seq1_m.39018 | ribosomal protein L34 [Arabidopsis thaliana] PREDICTED: 50S ribosomal protein L29, chloroplastic [Gossypium raimondii]                        | 22.839 | 15.99  | 19.6 | 4 | 5 | 4 | 1.016 | 0.969 | 1.018 | 1.007 | 1.001 | 0.98  | 0.995 | 8.03E-01 |
| cds.Camellia_sinensis.comp25300_c0_seq1_m.38412 | ribosomal protein L29, chloroplastic [Gossypium raimondii]                                                                                    | 24.866 | 26.5   | 19   | 4 | 5 | 4 | 1.097 | 1.071 | 1.093 | 0.97  | 0.889 | 0.892 | 0.844 | 4.40E-03 |

|                                                  |                                                                                               |        |        |      |    |    |    |       |       |       |       |       |       |       |          |
|--------------------------------------------------|-----------------------------------------------------------------------------------------------|--------|--------|------|----|----|----|-------|-------|-------|-------|-------|-------|-------|----------|
| cds.Camellia_sinensis.comp2531_1_c0_seq1_m.7542  | PREDICT<br>ED:<br>calnexin homolog 1-like<br>[Nicotiana tabacum]                              | 62.823 | 92.933 | 33.2 | 15 | 21 | 15 | 1.029 | 0.988 | 1.01  | 1.008 | 0.995 | 0.971 | 0.982 | 3.34E-01 |
| cds.Camellia_sinensis.comp2531_2_c0_seq3_m.20634 | PREDICT<br>ED: 5'-adenylylsulfate reductase 3, chloroplastic-like<br>[Nicotiana tabacum]      | 52.173 | 23.034 | 12   | 5  | 6  | 5  | 0.914 | 0.944 | 0.974 | 1.036 | 1.119 | 1.103 | 1.15  | 9.50E-03 |
| cds.Camellia_sinensis.comp2531_6_c0_seq1_m.8737  | PREDICT<br>ED:<br>translation initiation factor IF-2, chloroplastic-like<br>[Nelumbonucifera] | 81.562 | 49.172 | 14.6 | 10 | 12 | 10 | 1.103 | 1.11  | 1.107 | 0.897 | 0.895 | 0.862 | 0.799 | 3.38E-03 |
| cds.Camellia_sinensis.comp2531_7_c0_seq1_m.7453  | PREDICT<br>ED:<br>magnesium-chelatase subunit ChlD, chloroplastic isoform X1<br>[Nelumbo]     | 77.766 | 15.358 | 12   | 8  | 9  | 8  | 1.088 | 1.042 | 1.085 | 0.986 | 0.836 | 0.861 | 0.835 | 2.54E-02 |

|                                                  |        |        |      |   |   |   |       |       |       |       |       |       |       |          |
|--------------------------------------------------|--------|--------|------|---|---|---|-------|-------|-------|-------|-------|-------|-------|----------|
| cds.Camellia_sinensis.comp2534_4_c0_seq1_m.53989 | 9.9658 | 12.967 | 18.3 | 1 | 1 | 1 | 0.886 | 0.734 | 0.986 | 1.152 | 1.15  | 1.149 | 1.324 | 7.91E-02 |
| cds.Camellia_sinensis.comp2534_9_c0_seq1_m.49225 | 16.177 | 4.8822 | 7    | 1 | 2 | 1 | 0.989 | 0.865 | 0.886 | 1.091 | 1.135 | 1.067 | 1.202 | 1.47E-02 |
| cds.Camellia_sinensis.comp2536_1_c0_seq1_m.33769 | 22.167 | 50.225 | 18   | 2 | 4 | 2 | 1.052 | 1.063 | 0.973 | 0.918 | 0.952 | 0.989 | 0.926 | 9.50E-02 |
| cds.Camellia_sinensis.comp2536_6_c0_seq1_m.40729 | 27.259 | 15.557 | 6.4  | 1 | 1 | 1 | 1.007 | 1.004 | 1.074 | 0.928 | 1.068 | 0.923 | 0.946 | 3.38E-01 |
| cds.Camellia_sinensis.comp2536_7_c0_seq1_m.46441 | 11.617 | 5.8756 | 25.5 | 2 | 2 | 2 | 1.02  | 0.959 | 0.941 | 1.147 | 0.918 | 1.033 | 1.061 | 4.64E-01 |

PREDICT

ED:

thioredoxi

n-like

protein

CXXS1

[Theobrom

a cacao]

Heavy

metal

transport/d

etoxificati

on

superfamil

y protein

[Arabidop

sis

thaliana]

ATP-

dependent

Clp

protease

ATP-

binding

subunit

[Arabidop

sis

thaliana]

calcium-

dependent

kinase

[Medicago

truncatula]

|                                |                                                                                                                                                           |        |        |      |   |    |   |       |       |       |       |       |       |       |          |
|--------------------------------|-----------------------------------------------------------------------------------------------------------------------------------------------------------|--------|--------|------|---|----|---|-------|-------|-------|-------|-------|-------|-------|----------|
| cds.Camellia_sinensis.comp2537 | PREDICT<br>ED:<br>translocon-associated protein subunit beta [Vitis vinifera]<br>polyketide cyclase/dehydrase and lipid transporter [Medicago truncatula] | 21.146 | 46.895 | 20.5 | 2 | 5  | 2 | 0.937 | 1.004 | 1.016 | 1.038 | 1.043 | 1.038 | 1.055 | 1.66E-01 |
| cds.Camellia_sinensis.comp2538 | 3_c0_seq1_m.46956                                                                                                                                         | 16.041 | 2.5326 | 11.3 | 1 | 1  | 1 |       |       |       |       |       |       |       |          |
| cds.Camellia_sinensis.comp2539 | PREDICT<br>ED:<br>premnaspirodiene oxygenase-like [Vitis vinifera]                                                                                        | 38.624 | 3.331  | 3.5  | 1 | 1  | 1 | 1.074 | 0.895 | 1.051 | 1.027 | 0.928 | 1.027 | 0.987 | 8.82E-01 |
| cds.Camellia_sinensis.comp2539 | PREDICT<br>ED:<br>eukaryotic translation initiation factor 3 subunit G [Vitis vinifera]                                                                   | 26.215 | 101.71 | 41.2 | 9 | 12 | 7 | 1.036 | 0.996 | 1.066 | 0.988 | 0.982 | 0.98  | 0.952 | 1.34E-01 |
| cds.Camellia_sinensis.comp2541 | PREDICT<br>ED: 26S<br>proteasome non-ATPase regulatory subunit 6 [Ziziphus jujuba]                                                                        | 44.12  | 58.21  | 21.4 | 7 | 15 | 7 | 0.958 | 0.954 | 0.954 | 1.039 | 1.032 | 1.044 | 1.087 | 2.07E-05 |

|                                                                 |                                                                                                                                                       |        |        |      |   |    |   |       |       |       |       |       |       |       |          |
|-----------------------------------------------------------------|-------------------------------------------------------------------------------------------------------------------------------------------------------|--------|--------|------|---|----|---|-------|-------|-------|-------|-------|-------|-------|----------|
|                                                                 | PREDICT<br>ED:<br>succinate<br>dehydroge                                                                                                              |        |        |      |   |    |   |       |       |       |       |       |       |       |          |
| cds.Camell<br>ia_sinensis<br>.comp2541<br>2_c0_seq1<br>_m.11340 | nase<br>[ubiquinon<br>e] iron-<br>sulfur<br>subunit 2,<br>mitochond<br>rial-like<br>[Nelumbo<br>nucifera]<br>PREDICT<br>ED:<br>succinate<br>dehydroge | 31.441 | 81.003 | 29.4 | 7 | 16 | 4 | 1.047 | 0.99  | 0.956 | 0.998 | 0.983 | 1.027 | 1.005 | 8.60E-01 |
| cds.Camell<br>ia_sinensis<br>.comp2541<br>2_c0_seq2<br>_m.34327 | nase<br>[ubiquinon<br>e] iron-<br>sulfur<br>subunit 2,<br>mitochond<br>rial-like<br>[Nelumbo<br>nucifera]<br>PREDICT<br>ED:<br>succinate<br>dehydroge | 34.504 | 11.8   | 20.3 | 6 | 10 | 3 | 0.97  | 1.073 | 1.028 | 0.988 | 0.945 | 0.926 | 0.931 | 1.12E-01 |
| cds.Camell<br>ia_sinensis<br>.comp2541<br>6_c0_seq1<br>_m.20324 | eukaryotic<br>translation<br>initiation<br>factor 3<br>subunit J-<br>like<br>[Juglans<br>regia]                                                       | 25.642 | 4.8247 | 6.6  | 1 | 1  | 1 | 0.997 | 1.114 | 1.076 | 0.821 | 0.888 | 1.087 | 0.877 | 2.02E-01 |

|                                                 |                                                                                |        |        |      |    |    |    |       |       |       |       |       |       |       |          |
|-------------------------------------------------|--------------------------------------------------------------------------------|--------|--------|------|----|----|----|-------|-------|-------|-------|-------|-------|-------|----------|
| cds.Camellia_sinensis.comp25419_c0_seq1_m.11908 | PREDICTED: 3-oxoacyl-[acyl-carrier-protein] synthase II, chloroplastic [Vitis] | 61.051 | 31.903 | 10.6 | 5  | 6  | 5  | 0.963 | 1     | 0.997 | 1.072 | 0.988 | 0.996 | 1.032 | 3.35E-01 |
| cds.Camellia_sinensis.comp25420_c0_seq1_m.34045 | PREDICTED: BOBBER 1 [Sesamum indicum]                                          | 33.459 | 43.941 | 37.2 | 13 | 21 | 13 | 1.078 | 1.075 | 1.083 | 0.912 | 0.91  | 0.936 | 0.852 | 6.36E-05 |
| cds.Camellia_sinensis.comp25432_c0_seq1_m.14970 | PREDICTED: beta-glucosidase BoGH3B-like [Malus domestica]                      | 71.667 | 77.376 | 23   | 11 | 27 | 10 | 0.925 | 0.915 | 0.921 | 1.104 | 1.087 | 1.075 | 1.183 | 3.80E-05 |
| cds.Camellia_sinensis.comp25440_c0_seq1_m.32595 | PREDICTED: 2-hydroxyisoflavanone dehydratase-like [Vitis vinifera]             | 37.254 | 15.621 | 2.9  | 1  | 1  | 1  | 0.942 | 0.961 | 0.979 | 1.038 | 1.045 | 1.058 | 1.09  | 2.28E-03 |
| cds.Camellia_sinensis.comp25442_c0_seq1_m.40798 | PREDICTED: 40S ribosomal protein S15 [Ricinus communis]                        | 17.202 | 10.646 | 19.2 | 2  | 5  | 1  | 1.215 | 1.125 | 1.264 | 0.756 | 0.871 | 0.713 | 0.649 | 3.18E-03 |





|                                                  |                                                                                                                             |        |        |      |    |    |    |       |       |       |       |       |       |       |          |
|--------------------------------------------------|-----------------------------------------------------------------------------------------------------------------------------|--------|--------|------|----|----|----|-------|-------|-------|-------|-------|-------|-------|----------|
|                                                  | PREDICT<br>ED:                                                                                                              |        |        |      |    |    |    |       |       |       |       |       |       |       |          |
| cds.Camellia_sinensis.comp2545_4_c0_seq1_m.28314 | naringenin, 2-oxoglutarate 3-dioxygenase<br>[Ziziphus FAD-dependent oxidoreductase family protein<br>[Populus trichocarpa]] | 44.491 | 178.49 | 49.4 | 18 | 49 | 18 | 1.386 | 1.375 | 1.399 | 0.556 | 0.589 | 0.561 | 0.41  | 5.66E-07 |
| cds.Camellia_sinensis.comp2545_5_c0_seq1_m.29329 |                                                                                                                             | 40.614 | 5.0158 | 5.7  | 2  | 2  | 2  |       |       |       |       |       |       |       |          |
|                                                  | PREDICT<br>ED: outer                                                                                                        |        |        |      |    |    |    |       |       |       |       |       |       |       |          |
| cds.Camellia_sinensis.comp2547_0_c0_seq1_m.21842 | envelope pore protein 37, chloroplastic<br>[Solanum pennellii]                                                              | 41.219 | 26.377 | 20.6 | 6  | 9  | 6  | 0.99  | 0.998 | 0.968 | 1.012 | 1.013 | 1     | 1.023 | 8.23E-02 |
|                                                  | PREDICT<br>ED:                                                                                                              |        |        |      |    |    |    |       |       |       |       |       |       |       |          |
| cds.Camellia_sinensis.comp2547_4_c0_seq1_m.11244 | probable tRNA (guanine(2,6)-N(2)-dimethyltransferase 2 isoform X1 [Vitis vinifera])                                         | 66.23  | 1.6165 | 1.5  | 1  | 1  | 1  | 1.025 | 0.983 | 1.169 | 0.928 | 0.929 | 0.96  | 0.887 | 9.23E-02 |

|                                                  |                                                                                                             |        |        |      |    |    |    |       |       |       |       |       |       |       |          |
|--------------------------------------------------|-------------------------------------------------------------------------------------------------------------|--------|--------|------|----|----|----|-------|-------|-------|-------|-------|-------|-------|----------|
| cds.Camellia_sinensis.comp2547_6_c0_seq1_m.42537 | alba<br>DNA/RNA-binding protein<br>[Medicago truncatula]<br>PREDICT                                         | 14.425 | 26.296 | 30.2 | 5  | 8  | 1  | 0.923 | 0.943 | 0.939 | 1.074 | 1.173 | 0.985 | 1.152 | 1.12E-01 |
| cds.Camellia_sinensis.comp2548_8_c0_seq1_m.16338 | ED:<br>protein disulfide isomerase-like 1-4<br>[Populus euphratica]<br>PREDICT                              | 64.24  | 102.49 | 28.5 | 15 | 20 | 15 | 1.115 | 1.113 | 1.082 | 0.912 | 0.881 | 0.883 | 0.808 | 1.38E-04 |
| cds.Camellia_sinensis.comp2549_4_c0_seq1_m.22116 | ED: casein kinase II subunit alpha-like isoform X1<br>[Nicotiana tabacum]<br>PREDICT                        | 51.354 | 12.596 | 12.9 | 5  | 6  | 5  | 0.974 | 1.02  | 0.989 | 1.077 | 0.98  | 0.99  | 1.021 | 5.66E-01 |
| cds.Camellia_sinensis.comp2549_7_c0_seq1_m.43426 | ED:<br>NADH dehydrogenase [ubiquinone] 1 beta subcomplex subunit 9<br>[Eucalyptus grandis]<br>transmembrane | 13.387 | 38.348 | 45.2 | 6  | 13 | 6  | 1.017 | 1.025 | 1.098 | 0.966 | 0.967 | 0.941 | 0.915 | 2.74E-02 |
| cds.Camellia_sinensis.comp2549_8_c0_seq1_m.39612 | protein, putative<br>[Medicago truncatula]                                                                  | 26.761 | 3.9404 | 12.4 | 3  | 3  | 3  | 0.985 | 0.987 | 0.984 | 0.992 | 1.01  | 1.008 | 1.018 | 8.84E-02 |

|                                                  |                                                                                                                               |        |        |      |   |    |   |       |       |       |       |       |       |       |          |
|--------------------------------------------------|-------------------------------------------------------------------------------------------------------------------------------|--------|--------|------|---|----|---|-------|-------|-------|-------|-------|-------|-------|----------|
| cds.Camellia_sinensis.comp2550_2_c0_seq1_m.37641 | abscisic stress-ripening protein 2-like [Citrus sinensis] PREDICTED: ribulose-1,5-bisphosphate                                | 23.762 | 59.028 | 34.3 | 5 | 17 | 5 | 1.231 | 1.097 | 1.134 | 0.802 | 0.836 | 0.855 | 0.72  | 1.10E-03 |
| cds.Camellia_sinensis.comp2551_0_c0_seq3_m.18506 | carboxylase/oxygenase large subunit N-methyltransferase, chloroplastic [Citrus sinensis] PREDICTED: ribulose-1,5-bisphosphate | 35.027 | 1.3106 | 3.9  | 1 | 1  | 1 |       |       |       |       |       |       |       |          |
| cds.Camellia_sinensis.comp2551_0_c0_seq3_m.18507 | carboxylase/oxygenase large subunit N-methyltransferase, chloroplastic-like isoform X4 [Theobroma cacao]                      | 26.164 | 2.7583 | 5.3  | 1 | 1  | 1 | 0.968 | 1.121 | 1.047 | 0.948 | 1.016 | 0.903 | 0.914 | 1.77E-01 |

|                                                  |                                                                                                                                                       |        |        |      |    |    |    |       |       |       |       |       |       |       |          |
|--------------------------------------------------|-------------------------------------------------------------------------------------------------------------------------------------------------------|--------|--------|------|----|----|----|-------|-------|-------|-------|-------|-------|-------|----------|
| cds.Camellia_sinensis.comp2552_2_c0_seq1_m.12388 | PREDICTED:<br>dihydrolipoyllysine-residue acetyltransferase component 2 of pyruvate dehydrogenase complex, mitochondrial isoform X1 [Sesamum indicum] | 37.435 | 184.02 | 41.9 | 12 | 24 | 12 | 1.021 | 0.986 | 0.983 | 1.015 | 1.002 | 1.005 | 1.011 | 4.46E-01 |
| cds.Camellia_sinensis.comp2552_2_c0_seq1_m.12389 | PREDICTED:<br>dihydrolipoyllysine-residue acetyltransferase component 2 of pyruvate dehydrogenase complex, mitochondrial-like [Juglans regia]         | 30.446 | 49.675 | 26.2 | 7  | 13 | 7  | 1.014 | 0.978 | 0.976 | 0.997 | 1     | 1.035 | 1.022 | 2.84E-01 |
| cds.Camellia_sinensis.comp2554_0_c0_seq1_m.38260 |                                                                                                                                                       | 23.186 | 19.294 | 20.2 | 4  | 6  | 4  | 1.049 | 1.043 | 1.026 | 0.948 | 0.94  | 0.959 | 0.913 | 5.00E-04 |

|                                |                   |                                                                              |        |        |      |    |    |    |       |       |       |       |       |       |       |          |
|--------------------------------|-------------------|------------------------------------------------------------------------------|--------|--------|------|----|----|----|-------|-------|-------|-------|-------|-------|-------|----------|
| cds.Camellia_sinensis.comp2554 | 4_c0_seq1_m.33642 | PREDICT ED: UPF0301 protein Cpha266_0885 [Citrus sinensis]                   | 31.92  | 1.1885 | 9.2  | 2  | 2  | 2  | 1.12  | 1.31  | 1.04  | 0.819 | 0.752 | 0.912 | 0.716 | 1.93E-02 |
| cds.Camellia_sinensis.comp2554 | 9_c0_seq1_m.3438  | PREDICT ED: hexokinase -1 isoform X1 [Vitis vinifera]                        | 59.434 | 103.99 | 33.8 | 14 | 27 | 14 | 0.933 | 0.955 | 1.021 | 1.049 | 1.029 | 1.034 | 1.07  | 6.91E-02 |
| cds.Camellia_sinensis.comp2555 | 1_c0_seq2_m.25546 | transglutaminase family protein [Medicago truncatula]                        | 25.884 | 2.0705 | 4.1  | 1  | 1  | 1  | 0.878 | 0.961 | 1.008 | 0.98  | 1.162 | 1.043 | 1.119 | 1.58E-01 |
| cds.Camellia_sinensis.comp2555 | 2_c0_seq1_m.33134 | PREDICT ED: probable carboxylesterase 12 [Juglans regia]                     | 37.866 | 16.149 | 13.9 | 4  | 5  | 4  | 0.985 | 1.084 | 1.088 | 0.901 | 0.959 | 0.954 | 0.891 | 4.02E-02 |
| cds.Camellia_sinensis.comp2555 | 9_c0_seq1_m.36815 | PREDICT ED: outer envelope pore protein 16-3, chloroplast [Ricinus communis] | 24.653 | 4.1982 | 12.4 | 3  | 5  | 3  | 0.988 | 1.024 | 0.97  | 1.02  | 1.028 | 0.935 | 1     | 9.93E-01 |

|                                                 |                                                                                          |        |        |      |    |    |    |       |       |       |       |       |       |       |          |
|-------------------------------------------------|------------------------------------------------------------------------------------------|--------|--------|------|----|----|----|-------|-------|-------|-------|-------|-------|-------|----------|
| cds.Camellia_sinensis.comp25562_c0_seq2_m.49216 | PREDICTED: 1-aminocyclopropane-1-carboxylate oxidase [Gossypium hirsutum]                | 11.278 | 1.4641 | 8.9  | 1  | 1  | 1  | 1.056 | 1.22  | 1.184 | 0.926 | 0.742 | 0.843 | 0.726 | 1.43E-02 |
| cds.Camellia_sinensis.comp25568_c0_seq1_m.32625 | transmembrane protein [Arabidopsis thaliana]                                             | 33.457 | 27.254 | 15.3 | 4  | 8  | 4  | 1.039 | 1.034 | 1.033 | 0.936 | 0.976 | 0.967 | 0.927 | 2.72E-02 |
| cds.Camellia_sinensis.comp25586_c0_seq1_m.20566 | PREDICTED: aminoacylase-1 isoform X2 [Vitis vinifera]                                    | 49.15  | 88.904 | 33.2 | 12 | 19 | 12 | 0.948 | 0.984 | 0.955 | 1.053 | 1.052 | 1.048 | 1.092 | 1.65E-02 |
| cds.Camellia_sinensis.comp25603_c0_seq1_m.23574 | uncharacterized LOC107793530 [Nicotiana tabacum]                                         | 44.036 | 20.097 | 14.8 | 5  | 5  | 5  | 1.017 | 1.003 | 1.033 | 0.93  | 0.991 | 1.025 | 0.965 | 2.88E-01 |
| cds.Camellia_sinensis.comp25606_c0_seq1_m.24811 | PREDICTED: signal recognition particle 43 kDa protein, chloroplastic [Solanum tuberosum] | 47.758 | 49.651 | 28.7 | 14 | 17 | 14 | 0.992 | 0.973 | 1.004 | 1.015 | 1.019 | 0.988 | 1.018 | 2.55E-01 |







|                                                  |                                                                              |        |        |      |   |    |   |       |       |       |       |       |       |       |          |
|--------------------------------------------------|------------------------------------------------------------------------------|--------|--------|------|---|----|---|-------|-------|-------|-------|-------|-------|-------|----------|
| cds.Camellia_sinensis.comp2565_1_c0_seq1_m.34569 | PREDICT ED: 50S ribosomal protein L13, chloroplast ic-like [Capsicum annuum] | 22.568 | 11.41  | 17.6 | 3 | 4  | 3 | 1.036 | 1.024 | 1.038 | 0.982 | 0.99  | 0.955 | 0.945 | 8.26E-03 |
| cds.Camellia_sinensis.comp2565_2_c0_seq1_m.11281 | PREDICT ED: paramyosin [Erythranthe guttata]                                 | 17.273 | 1.9099 | 7.3  | 1 | 1  | 1 |       |       |       |       |       |       |       |          |
| cds.Camellia_sinensis.comp2565_2_c0_seq2_m.20881 | PREDICT ED: paramyosin isoform X2 [Vitis vinifera] Cu/Zn                     | 43.386 | 2.4085 | 6.5  | 3 | 3  | 3 |       |       |       |       |       |       |       |          |
| cds.Camellia_sinensis.comp2565_8_c0_seq1_m.38497 | superoxide dismutase family protein [Populus trichocarpa]                    | 15.167 | 67.447 | 40.1 | 5 | 20 | 4 | 0.932 | 0.931 | 0.941 | 1.055 | 1.095 | 1.091 | 1.156 | 3.00E-04 |
| cds.Camellia_sinensis.comp2566_3_c0_seq1_m.7758  | PREDICT ED: protein SMAX1-LIKE 4 [Vitis vinifera]                            | 106.65 | 1.6125 | 1.3  | 1 | 1  | 1 | 1.085 | 1.001 | 1.118 | 1.062 | 0.893 | 0.837 | 0.871 | 1.45E-01 |

|                                                  |                                                                                          |        |        |      |    |    |    |       |       |       |       |       |       |       |          |
|--------------------------------------------------|------------------------------------------------------------------------------------------|--------|--------|------|----|----|----|-------|-------|-------|-------|-------|-------|-------|----------|
| cds.Camellia_sinensis.comp2566_4_c0_seq2_m.46175 | PREDICT<br>ED:<br>protein disulfide isomerase-like 5-1 [Vitis vinifera]                  | 16.911 | 2.3361 | 12.8 | 2  | 3  | 1  | 1.003 | 1.062 | 0.978 | 0.979 | 1.006 | 0.976 | 0.973 | 3.64E-01 |
| cds.Camellia_sinensis.comp2566_4_c0_seq3_m.47339 | PREDICT<br>ED:<br>protein disulfide isomerase-like 5-1 [Vitis vinifera]                  | 16.908 | 8.5579 | 15.4 | 3  | 5  | 2  | 1.038 | 1.079 | 1.023 | 0.977 | 0.832 | 1.043 | 0.908 | 2.19E-01 |
| cds.Camellia_sinensis.comp2568_0_c0_seq1_m.17593 | PSI reaction center subunit II [Citrus sinensis]                                         | 25.308 | 137.71 | 48.7 | 11 | 83 | 11 | 1.017 | 1.033 | 1.01  | 0.986 | 0.997 | 0.976 | 0.967 | 2.08E-02 |
| cds.Camellia_sinensis.comp2569_1_c0_seq2_m.8971  | PREDICT<br>ED: 5'-nucleotide domain-containing protein 4-like isoform X2 [Juglans regia] | 67.005 | 98.762 | 20   | 10 | 18 | 10 | 0.938 | 0.99  | 0.964 | 1.03  | 1.032 | 1.029 | 1.069 | 5.05E-02 |
| cds.Camellia_sinensis.comp2569_2_c0_seq2_m.33412 | PREDICT<br>ED: urease accessory protein G [Ziziphus jujuba]                              | 32.046 | 71.654 | 30.6 | 7  | 14 | 7  | 1.038 | 1.046 | 1.066 | 0.919 | 0.966 | 0.947 | 0.899 | 2.96E-03 |

|                                                  |                                                                                                                |        |        |      |    |    |    |       |       |       |       |       |       |       |          |
|--------------------------------------------------|----------------------------------------------------------------------------------------------------------------|--------|--------|------|----|----|----|-------|-------|-------|-------|-------|-------|-------|----------|
|                                                  | PREDICT<br>ED:<br>threonine<br>dehydratase                                                                     |        |        |      |    |    |    |       |       |       |       |       |       |       |          |
| cds.Camellia_sinensis.comp2569_6_c0_seq1_m.13773 | biosynthetic, chloroplastic<br>[Nelumbo nucifera]                                                              | 66.833 | 10.193 | 8    | 5  | 6  | 5  | 1.021 | 1.025 | 1.01  | 1.019 | 0.989 | 0.973 | 0.975 | 1.54E-01 |
|                                                  | PREDICT<br>ED: lon<br>protease<br>homolog,<br>mitochondrial-like<br>[Nelumbo nucifera]                         |        |        |      |    |    |    |       |       |       |       |       |       |       |          |
| cds.Camellia_sinensis.comp2569_7_c0_seq1_m.5308  | mitochondrial-like<br>[Nelumbo nucifera]                                                                       | 109.28 | 41.408 | 16.5 | 12 | 15 | 12 | 1     | 0.961 | 0.951 | 0.994 | 1.027 | 1.003 | 1.038 | 1.05E-01 |
|                                                  | PREDICT<br>ED: 40S<br>ribosomal<br>protein S6<br>[Musa acuminata subsp. malaccensis]                           |        |        |      |    |    |    |       |       |       |       |       |       |       |          |
| cds.Camellia_sinensis.comp2570_0_c0_seq1_m.51328 | ribosomal protein S6<br>[Musa acuminata subsp. malaccensis]                                                    | 20.093 | 5.7845 | 13.1 | 2  | 2  | 1  |       |       |       |       |       |       |       |          |
|                                                  | PREDICT<br>ED:<br>lethal(2)<br>giant<br>larvae<br>protein<br>homolog<br>SRO77-like<br>isoform<br>X1<br>[Prunus |        |        |      |    |    |    |       |       |       |       |       |       |       |          |
| cds.Camellia_sinensis.comp2571_1_c0_seq1_m.4368  | lethal(2)<br>giant larvae protein homolog<br>SRO77-like isoform X1<br>[Prunus                                  | 121.56 | 8.1733 | 3.5  | 4  | 5  | 4  | 1.031 | 0.901 | 1.035 | 0.984 | 1.046 | 1.012 | 1.025 | 6.14E-01 |

|                                |                                                                                           |        |        |      |   |    |   |       |       |       |       |       |       |       |          |
|--------------------------------|-------------------------------------------------------------------------------------------|--------|--------|------|---|----|---|-------|-------|-------|-------|-------|-------|-------|----------|
| cds.Camellia_sinensis.comp2571 | PREDICT<br>ED: 30S<br>ribosomal protein S20, chloroplast ic-like<br>[Nicotiana attenuata] | 20.293 | 4.4965 | 4.9  | 1 | 1  | 1 | 1.08  | 1.091 | 1.205 | 0.873 | 0.901 | 0.825 | 0.77  | 3.86E-03 |
| cds.Camellia_sinensis.comp2572 | actin cross-linking protein<br>[Medicago truncatula]                                      | 33.561 | 1.3064 | 3    | 1 | 1  | 1 | 1.034 | 1.197 | 1.049 | 0.894 | 0.838 | 0.968 | 0.823 | 3.60E-02 |
| cds.Camellia_sinensis.comp2572 | PREDICT<br>ED: fatty-acid-binding protein 1<br>[Jatropha curcas]                          | 33.225 | 59.404 | 25.7 | 8 | 11 | 8 | 0.995 | 0.991 | 0.993 | 1.038 | 1.011 | 1.001 | 1.024 | 1.64E-01 |
| cds.Camellia_sinensis.comp2572 | nucleoporin protein Ndc1-Nup<br>[Medicago truncatula]                                     | 62.648 | 1.4679 | 3.4  | 1 | 1  | 1 |       |       |       |       |       |       |       |          |
| cds.Camellia_sinensis.comp2572 | PREDICT<br>ED:<br>prostaglandin E synthase 2<br>[Jatropha curcas]                         | 27.428 | 5.8107 | 10.5 | 4 | 5  | 3 | 0.998 | 0.974 | 1.023 | 0.984 | 1.049 | 0.944 | 0.994 | 8.51E-01 |

|                                                  |                                                                                                              |        |        |      |    |    |    |       |       |       |       |       |       |       |          |
|--------------------------------------------------|--------------------------------------------------------------------------------------------------------------|--------|--------|------|----|----|----|-------|-------|-------|-------|-------|-------|-------|----------|
| cds.Camellia_sinensis.comp2572.8_c0_seq2_m.49862 | PREDICT<br>ED:<br>thioredoxin-1 isoform X1<br>[Juglans regia]                                                | 15.412 | 13.626 | 7.7  | 1  | 7  | 1  | 1.009 | 0.975 | 0.993 | 1.025 | 0.985 | 1.008 | 1.014 | 4.20E-01 |
| cds.Camellia_sinensis.comp2574.4_c0_seq1_m.47627 | PREDICT<br>ED:<br>dolichyl-diphosphooligosaccharide--glycosyltransferase subunit DAD1<br>[Nicotiana tabacum] | 12.779 | 4.9561 | 8.6  | 1  | 1  | 1  | 1.056 | 0.884 | 0.906 | 1.048 | 1.02  | 1.101 | 1.113 | 1.40E-01 |
| cds.Camellia_sinensis.comp2574.5_c0_seq1_m.29044 | PREDICT<br>ED:<br>mitogen-activated protein kinase kinase 5-like<br>[Capsicum annuum]                        | 39.991 | 9.3595 | 7.2  | 2  | 4  | 2  | 0.914 | 0.979 | 0.914 | 1.217 | 1.032 | 1.043 | 1.173 | 5.37E-02 |
| cds.Camellia_sinensis.comp2574.7_c1_seq1_m.2467  | PREDICT<br>ED:<br>splicing factor 3B subunit 3<br>[Vitis vinifera]                                           | 135    | 53.97  | 15.3 | 18 | 22 | 18 | 0.975 | 0.975 | 0.985 | 1.054 | 1.026 | 1.022 | 1.057 | 5.76E-03 |





|                                                  |                                                                                         |        |        |      |    |    |    |       |       |       |       |       |       |       |          |
|--------------------------------------------------|-----------------------------------------------------------------------------------------|--------|--------|------|----|----|----|-------|-------|-------|-------|-------|-------|-------|----------|
| cds.Camellia_sinensis.comp2581_9_c1_seq1_m.34973 | PREDICT ED: protein TIC 21, chloroplast ic [Sesamum indicum]                            | 23.708 | 6.6089 | 6.2  | 1  | 2  | 1  |       |       |       |       |       |       |       |          |
| cds.Camellia_sinensis.comp2582_3_c0_seq1_m.34065 | PREDICT ED: B-cell receptor-associated protein 31-like [Nicotiana tabacum] plastid      | 25.52  | 13.796 | 19   | 4  | 6  | 4  | 1.053 | 1.007 | 1.052 | 0.957 | 1.014 | 0.915 | 0.927 | 8.37E-02 |
| cds.Camellia_sinensis.comp2582_4_c0_seq1_m.44079 | transcriptionally active protein [Medicago truncatula]                                  | 16.976 | 3.6322 | 5.6  | 1  | 2  | 1  | 0.982 | 1.012 | 0.956 | 1.038 | 0.985 | 1.042 | 1.039 | 1.94E-01 |
| cds.Camellia_sinensis.comp2583_4_c0_seq1_m.24919 | PREDICT ED: probable fructose-bisphosphate aldolase 3, chloroplast ic [Sesamum indicum] | 44.523 | 93.59  | 42.6 | 14 | 24 | 13 | 1.013 | 1.011 | 1.02  | 0.983 | 0.969 | 1.014 | 0.974 | 1.28E-01 |
| cds.Camellia_sinensis.comp2583_8_c0_seq1_m.32758 | HN1-like protein [Medicago truncatula]                                                  | 37.07  | 10.787 | 18.6 | 4  | 5  | 3  | 0.942 | 1.056 | 1.027 | 0.996 | 1     | 0.974 | 0.982 | 6.51E-01 |



|                                                  |                                                                                            |        |        |      |   |   |   |       |       |       |       |       |       |       |          |
|--------------------------------------------------|--------------------------------------------------------------------------------------------|--------|--------|------|---|---|---|-------|-------|-------|-------|-------|-------|-------|----------|
| cds.Camellia_sinensis.comp2584_3_c0_seq1_m.35993 | PREDICTED: NADP-dependent malic enzyme isoform X4<br>[Nelumbo nucifera]                    | 33.802 | 2.0501 | 7.4  | 3 | 3 | 2 | 1.018 | 0.912 | 0.973 | 1.064 | 1.035 | 1.017 | 1.073 | 1.07E-01 |
| cds.Camellia_sinensis.comp2584_9_c0_seq1_m.26650 | PREDICTED: NEDD8-activating enzyme E1 catalytic subunit isoform X1<br>[Eucalyptus grandis] | 49.6   | 42.073 | 21.2 | 7 | 8 | 7 | 0.913 | 0.902 | 0.981 | 1.088 | 1.073 | 1.027 | 1.14  | 1.39E-02 |
| cds.Camellia_sinensis.comp2585_7_c0_seq1_m.29195 | PREDICTED: aldose 1-epimerase<br>[Vitis vinifera]                                          | 40.357 | 18.702 | 11.2 | 4 | 6 | 4 | 1.037 | 0.987 | 0.908 | 1.017 | 0.972 | 1.058 | 1.039 | 4.39E-01 |
| cds.Camellia_sinensis.comp2586_0_c0_seq1_m.29489 | PREDICTED: pirin-like protein<br>[Vitis vinifera]                                          | 38.139 | 5.561  | 4.4  | 1 | 1 | 1 | 0.987 | 1.205 | 1.038 | 0.96  | 0.902 | 0.901 | 0.855 | 7.36E-02 |
| cds.Camellia_sinensis.comp2586_2_c0_seq1_m.10282 | PREDICTED: ABC transporter G family member 7<br>[Vitis vinifera]                           | 82.033 | 19.904 | 10.2 | 7 | 8 | 7 | 1.008 | 1.026 | 1.016 | 0.964 | 0.96  | 1.005 | 0.96  | 5.85E-02 |

|                                                  |                                                                     |        |        |      |    |    |    |       |       |       |       |       |       |       |          |
|--------------------------------------------------|---------------------------------------------------------------------|--------|--------|------|----|----|----|-------|-------|-------|-------|-------|-------|-------|----------|
| cds.Camellia_sinensis.comp2586_3_c0_seq1_m.22745 | acetyl-CoA carboxylase beta subunit (chloroplast)                   | 57.987 | 20.483 | 18   | 7  | 8  | 7  | 1.034 | 0.985 | 0.989 | 1.035 | 0.967 | 0.959 | 0.984 | 6.05E-01 |
|                                                  | [Camellia sinensis] PREDICTED: NADH dehydrogenase                   |        |        |      |    |    |    |       |       |       |       |       |       |       |          |
| cds.Camellia_sinensis.comp2586_6_c0_seq1_m.12227 | [ubiquinone] iron-sulfur protein 1, mitochondrial isoform X1        | 81.741 | 130.03 | 27.4 | 17 | 31 | 17 | 0.992 | 1.022 | 0.993 | 1.012 | 1.003 | 0.994 | 1.001 | 9.50E-01 |
|                                                  | [Capsicum] PREDICTED: heterogenous nuclear ribonucleoprotein 1-like |        |        |      |    |    |    |       |       |       |       |       |       |       |          |
| cds.Camellia_sinensis.comp2586_8_c0_seq1_m.24454 | [Malus domestica]                                                   | 36.016 | 52.275 | 22.9 | 6  | 16 | 5  | 1.008 | 0.996 | 0.989 | 1.014 | 0.993 | 0.979 | 0.998 | 8.45E-01 |

|                                |                   |                                                                                                       |        |        |      |    |    |   |       |       |       |       |       |       |       |          |
|--------------------------------|-------------------|-------------------------------------------------------------------------------------------------------|--------|--------|------|----|----|---|-------|-------|-------|-------|-------|-------|-------|----------|
| cds.Camellia_sinensis.comp2587 | 9_c0_seq1_m.41545 | PREDICTED:<br>serine/threonine-protein phosphatase 6 regulatory subunit 2 isoform X1 [Vitis vinifera] | 23.261 | 70.13  | 24.4 | 3  | 3  | 3 | 1.062 | 0.991 | 1.002 | 0.999 | 0.907 | 1.009 | 0.954 | 3.02E-01 |
| cds.Camellia_sinensis.comp2588 | 4_c0_seq1_m.21957 | PREDICTED: DNA ligase 1 [Camelina sativa]                                                             | 42.672 | 5.2113 | 6.6  | 2  | 3  | 2 | 1.187 | 1.256 | 1.178 | 0.711 | 0.73  | 0.871 | 0.638 | 2.48E-03 |
| cds.Camellia_sinensis.comp2588 | 6_c0_seq2_m.41532 | PREDICTED: AP-2 complex subunit sigma [Sesamum indicum]                                               | 17.123 | 4.5003 | 12.7 | 2  | 2  | 2 | 0.915 | 0.911 | 0.964 | 1.078 | 1.085 | 1.082 | 1.163 | 1.42E-02 |
| cds.Camellia_sinensis.comp2590 | 7_c0_seq2_m.21991 | PREDICTED: ADP,ATP carrier protein 3, mitochondrial [Eucalyptus grandis]                              | 41.431 | 62.364 | 23   | 10 | 40 | 5 | 0.955 | 0.957 | 1.003 | 1.041 | 1.047 | 1.023 | 1.067 | 2.01E-02 |

|                                                  |                                                                                                                                                                                                        |        |        |      |   |   |   |       |       |       |       |       |       |       |          |
|--------------------------------------------------|--------------------------------------------------------------------------------------------------------------------------------------------------------------------------------------------------------|--------|--------|------|---|---|---|-------|-------|-------|-------|-------|-------|-------|----------|
|                                                  | PREDICT<br>ED:<br>multiple<br>organellar<br>RNA<br>editing<br>factor 2,<br>chloroplast<br>ic<br>[Nelumbo<br>nucifera]                                                                                  |        |        |      |   |   |   |       |       |       |       |       |       |       |          |
| cds.Camellia_sinensis.comp2591_3_c0_seq1_m.35215 |                                                                                                                                                                                                        | 26.916 | 8.1784 | 15.9 | 4 | 8 | 4 | 1.045 | 1.044 | 1.072 | 0.922 | 0.894 | 0.96  | 0.878 | 4.34E-03 |
|                                                  | PREDICT<br>ED: RNA-binding<br>protein<br>sym-2<br>isoform<br>X1<br>[Daucus<br>carota<br>subsp.<br>sativus]<br>glycoside<br>hydrolase<br>family 28<br>family<br>protein<br>[Populus<br>trichocarpa<br>] |        |        |      |   |   |   |       |       |       |       |       |       |       |          |
| cds.Camellia_sinensis.comp2592_4_c0_seq1_m.26348 |                                                                                                                                                                                                        | 43.031 | 16.416 | 19.8 | 6 | 8 | 6 | 0.981 | 0.999 | 0.967 | 1     | 1.04  | 1.066 | 1.054 | 6.63E-02 |
|                                                  | PREDICT<br>ED: sugar<br>transport<br>protein 14-<br>like<br>[Ipomoea<br>nil]                                                                                                                           |        |        |      |   |   |   |       |       |       |       |       |       |       |          |
| cds.Camellia_sinensis.comp2593_1_c0_seq1_m.22736 |                                                                                                                                                                                                        | 49.412 | 37.121 | 11.6 | 5 | 5 | 5 | 0.929 | 0.965 | 1.012 | 0.994 | 1.024 | 1.062 | 1.06  | 1.35E-01 |
|                                                  |                                                                                                                                                                                                        | 56.199 | 24.9   | 8.9  | 3 | 5 | 3 | 0.913 | 0.983 | 0.925 | 1.103 | 1.098 | 0.908 | 1.102 | 2.40E-01 |

|                                                  |                                                                                |        |        |      |   |    |   |       |       |       |       |       |       |       |          |
|--------------------------------------------------|--------------------------------------------------------------------------------|--------|--------|------|---|----|---|-------|-------|-------|-------|-------|-------|-------|----------|
| cds.Camellia_sinensis.comp2595_2_c0_seq2_m.14551 | PREDICT<br>ED:<br>cyclin-dependent kinase C-2 [Vitis vinifera]                 | 57.561 | 2.5708 | 4.6  | 3 | 4  | 2 | 1.031 | 0.972 | 0.996 | 1.09  | 0.956 | 0.967 | 1.005 | 9.48E-01 |
| cds.Camellia_sinensis.comp2595_5_c0_seq1_m.37552 | PREDICT<br>ED: 60S ribosomal protein L6-1-like [Pyrus x bretschneideri]        | 26.046 | 12.725 | 28.8 | 7 | 11 | 4 | 1.132 | 1.114 | 1.149 | 0.884 | 0.875 | 0.848 | 0.768 | 6.36E-05 |
| cds.Camellia_sinensis.comp2595_5_c0_seq2_m.40421 | PREDICT<br>ED: 60S ribosomal protein L6-1-like [Pyrus x bretschneideri]        | 27.725 | 26.374 | 31.4 | 8 | 13 | 5 | 1.092 | 1.153 | 1.116 | 0.868 | 0.907 | 0.855 | 0.783 | 4.97E-04 |
| cds.Camellia_sinensis.comp2598_7_c0_seq1_m.41894 | PREDICT<br>ED: malate dehydrogenase, glyoxysomal [Fragaria vesca subsp. vesca] | 16.653 | 9.0496 | 35.4 | 5 | 8  | 3 | 0.927 | 1.032 | 0.988 | 1.071 | 1.03  | 1.021 | 1.059 | 1.65E-01 |
| cds.Camellia_sinensis.comp2598_9_c0_seq1_m.19437 | PREDICT<br>ED:<br>cysteine proteinase COT44 [Citrus sinensis]                  | 40.341 | 127.46 | 32.5 | 9 | 20 | 8 | 1.097 | 1.086 | 1.059 | 0.909 | 0.895 | 0.93  | 0.843 | 3.65E-04 |

|                                                  |                                                                                      |        |        |      |   |    |   |       |       |       |       |       |       |       |          |
|--------------------------------------------------|--------------------------------------------------------------------------------------|--------|--------|------|---|----|---|-------|-------|-------|-------|-------|-------|-------|----------|
| cds.Camellia_sinensis.comp2599_0_c0_seq1_m.47421 | PREDICT ED: probable glutathione S-transferase [Nicotiana attenuata]                 | 16.041 | 6.961  | 27.7 | 7 | 20 | 5 | 1.027 | 0.975 | 0.947 | 0.974 | 0.974 | 1.056 | 1.019 | 6.37E-01 |
| cds.Camellia_sinensis.comp2599_5_c0_seq1_m.33788 | PREDICT ED: multiple organellar RNA editing factor 1, mitochondrial [Vitis vinifera] | 42.7   | 7.3164 | 9.4  | 3 | 4  | 3 | 1.055 | 0.98  | 1.015 | 0.966 | 0.955 | 1.027 | 0.967 | 3.34E-01 |
| cds.Camellia_sinensis.comp2599_6_c0_seq2_m.49305 |                                                                                      | 15.109 | 50.048 | 24.4 | 2 | 3  | 2 | 1.032 | 0.969 | 0.878 | 0.983 | 1.078 | 1.071 | 1.088 | 1.99E-01 |
| cds.Camellia_sinensis.comp2599_8_c0_seq1_m.11174 | PREDICT ED: protein FRIGIDA [Sesamum indicum]                                        | 78.87  | 9.8811 | 5.8  | 4 | 4  | 4 | 1.023 | 1.059 | 0.999 | 0.959 | 0.948 | 1.028 | 0.953 | 1.83E-01 |
| cds.Camellia_sinensis.comp2601_0_c0_seq1_m.30863 | PREDICT ED: putative 12-oxophytodieneoate reductase 11 [Theobroma cacao]             | 40.996 | 102.17 | 30.2 | 9 | 17 | 8 | 0.942 | 0.998 | 0.973 | 1.002 | 1.012 | 1.023 | 1.043 | 7.75E-02 |

|                                                  |                                                                              |        |        |      |    |    |   |       |       |       |       |       |       |       |          |
|--------------------------------------------------|------------------------------------------------------------------------------|--------|--------|------|----|----|---|-------|-------|-------|-------|-------|-------|-------|----------|
| cds.Camellia_sinensis.comp2601_3_c0_seq1_m.23914 | PREDICT<br>ED: triose phosphate/translocator, chloroplastic [Vitis vinifera] | 48.08  | 45.616 | 12.5 | 6  | 12 | 6 | 0.921 | 0.913 | 0.958 | 1.073 | 1.083 | 1.082 | 1.16  | 6.00E-04 |
| cds.Camellia_sinensis.comp2601_5_c0_seq1_m.29474 | thiamine monophosphate synthase [Medicago truncatula]                        | 32.552 | 43.382 | 30.5 | 8  | 11 | 8 | 1.008 | 0.977 | 0.974 | 1.001 | 1.067 | 0.986 | 1.032 | 3.06E-01 |
| cds.Camellia_sinensis.comp2601_6_c0_seq1_m.33501 | PREDICT<br>ED: V-type proton ATPase subunit E [Sesamum]                      | 26.333 | 69.18  | 45.9 | 10 | 23 | 7 | 1     | 0.982 | 0.962 | 1.01  | 1.026 | 1.04  | 1.045 | 3.52E-02 |
| cds.Camellia_sinensis.comp2601_8_c0_seq1_m.23404 | PREDICT<br>ED: serine--tRNA ligase [Vitis vinifera]                          | 46.11  | 37.742 | 23.9 | 9  | 10 | 9 | 1.019 | 1.043 | 1.027 | 0.984 | 0.977 | 0.976 | 0.951 | 2.32E-03 |
| cds.Camellia_sinensis.comp2602_3_c0_seq1_m.31133 | uncharacterized LOC107830728 [Nicotiana tabacum]                             | 31.217 | 67.113 | 19.8 | 5  | 9  | 5 | 1.054 | 1.056 | 0.95  | 0.983 | 1.028 | 0.94  | 0.964 | 4.57E-01 |





|                                                    |                                                               |        |        |      |    |    |   |       |       |       |       |       |       |       |          |
|----------------------------------------------------|---------------------------------------------------------------|--------|--------|------|----|----|---|-------|-------|-------|-------|-------|-------|-------|----------|
|                                                    | PREDICT                                                       |        |        |      |    |    |   |       |       |       |       |       |       |       |          |
|                                                    | ED:                                                           |        |        |      |    |    |   |       |       |       |       |       |       |       |          |
| cds.Camellia_sinensis.comp2604_2_c0_seq2_m.31341   | putative lactoylglutathione lyase isoform X2 [Vitis vinifera] | 32.712 | 144.92 | 49   | 13 | 56 | 2 | 0.942 | 0.966 | 0.953 | 1.057 | 1.051 | 1.043 | 1.101 | 3.01E-04 |
|                                                    | PREDICT                                                       |        |        |      |    |    |   |       |       |       |       |       |       |       |          |
|                                                    | ED: DNA-                                                      |        |        |      |    |    |   |       |       |       |       |       |       |       |          |
| cds.Camellia_sinensis.comp2604_6_c0_seq1_m.33895   | damage-repair/tolerance protein DRT102 [Nelumbo nucifera]     | 35.947 | 96.526 | 33.2 | 9  | 18 | 9 | 0.953 | 0.963 | 0.958 | 1.04  | 1.03  | 1.036 | 1.081 | 4.33E-05 |
|                                                    | PREDICT                                                       |        |        |      |    |    |   |       |       |       |       |       |       |       |          |
|                                                    | ED: non-                                                      |        |        |      |    |    |   |       |       |       |       |       |       |       |          |
| cds.Camellia_sinensis.comp2605_94_c0_seq1_m.5083_1 | specific phospholipase C4 isoform X2 [Vitis vinifera]         | 20.397 | 9.6276 | 17.1 | 3  | 4  | 3 | 0.933 | 1.044 | 1.122 | 0.85  | 0.966 | 1.085 | 0.936 | 4.85E-01 |
|                                                    | PREDICT                                                       |        |        |      |    |    |   |       |       |       |       |       |       |       |          |
|                                                    | ED:                                                           |        |        |      |    |    |   |       |       |       |       |       |       |       |          |
| cds.Camellia_sinensis.comp2605_9_c0_seq1_m.33749   | NADH--cytochrome b5 reductase 1 [Jatropha curcas]             | 33.016 | 29.643 | 20   | 7  | 10 | 6 | 0.991 | 0.971 | 1.002 | 0.973 | 1.012 | 0.977 | 0.999 | 9.64E-01 |

|                                                  |                                                                                        |        |        |      |   |    |   |       |       |       |       |       |       |       |          |
|--------------------------------------------------|----------------------------------------------------------------------------------------|--------|--------|------|---|----|---|-------|-------|-------|-------|-------|-------|-------|----------|
| cds.Camellia_sinensis.comp2606_1_c0_seq1_m.36997 | PREDICT<br>ED:<br>aminopeptidase M1 isoform X2 [Vitis vinifera]                        | 39.536 | 29.099 | 17.5 | 6 | 12 | 5 | 0.956 | 0.98  | 0.922 | 1.052 | 1.073 | 1.055 | 1.113 | 4.66E-03 |
| cds.Camellia_sinensis.comp2606_8_c0_seq1_m.26871 | PREDICT<br>ED: biotin carboxyl carrier protein of acetyl-CoA carboxylase [Prunus mume] | 30.685 | 13.609 | 18.4 | 5 | 7  | 5 | 1.013 | 1.07  | 1.021 | 0.98  | 0.991 | 0.978 | 0.95  | 4.42E-02 |
| cds.Camellia_sinensis.comp2607_3_c0_seq1_m.30288 | PREDICT<br>ED: 33 kDa ribonucleoprotein, chloroplastic [Juglans regia]                 | 35.214 | 49.763 | 19.3 | 6 | 10 | 6 | 1.016 | 1.004 | 1.07  | 0.981 | 0.969 | 0.976 | 0.947 | 5.27E-02 |
| cds.Camellia_sinensis.comp2608_1_c0_seq1_m.45814 | PREDICT<br>ED: L10-interacting MYB domain-containing protein-like [Cucumis melo]       | 19.175 | 3.2047 | 6.1  | 1 | 1  | 1 | 0.907 | 0.959 | 0.958 | 0.993 | 1.252 | 0.966 | 1.137 | 2.22E-01 |





|                                                 |                                                                                                        |        |        |     |   |    |   |       |       |       |       |       |       |       |          |
|-------------------------------------------------|--------------------------------------------------------------------------------------------------------|--------|--------|-----|---|----|---|-------|-------|-------|-------|-------|-------|-------|----------|
| cds.Camellia_sinensis.comp26123_c0_seq1_m.25847 | PREDICT<br>ED: heavy metal-associated isoprenylated plant protein 3-like isoform X2<br>[Juglans regia] | 39.119 | 2.0889 | 3.3 | 1 | 1  | 1 | 0.896 | 0.973 | 1.006 | 1.137 | 0.991 | 1.033 | 1.099 | 1.51E-01 |
| cds.Camellia_sinensis.comp26126_c0_seq1_m.48294 | PREDICT<br>ED: ras-related protein RABD2a-like<br>[Nicotiana tabacum]                                  | 17.122 | 1.5292 | 28  | 5 | 11 | 1 | 1.01  | 1.027 | 0.996 | 1.008 | 0.978 | 0.989 | 0.981 | 1.97E-01 |
| cds.Camellia_sinensis.comp26133_c0_seq1_m.13320 | PREDICT<br>ED: regulation of nuclear pre-mRNA domain-containing protein 1B-like<br>[Prunus mume]       | 60.867 | 3.8386 | 4.3 | 3 | 3  | 3 | 0.993 | 1.007 | 0.98  | 1.027 | 1.001 | 1.005 | 1.018 | 1.90E-01 |

|                                                 |                                                                                                 |        |        |      |    |    |    |       |       |       |       |       |       |       |          |
|-------------------------------------------------|-------------------------------------------------------------------------------------------------|--------|--------|------|----|----|----|-------|-------|-------|-------|-------|-------|-------|----------|
| cds.Camellia_sinensis.comp26136_c0_seq1_m.26384 | PREDICTED:<br>probable tocopherol O-methyltransferase, chloroplastic isoform X4 [Juglans regia] | 39.994 | 31.387 | 23.6 | 7  | 10 | 7  | 1.004 | 1.005 | 1.049 | 0.982 | 0.986 | 0.975 | 0.962 | 6.18E-02 |
| cds.Camellia_sinensis.comp26137_c0_seq1_m.14029 | PREDICTED:<br>flavonoid 3',5'-hydroxylase 2-like [Jatropha curcas]                              | 57.074 | 16.113 | 17.6 | 8  | 10 | 8  | 1.242 | 1.363 | 1.379 | 0.639 | 0.682 | 0.588 | 0.479 | 1.65E-04 |
| cds.Camellia_sinensis.comp26138_c0_seq1_m.38810 | PREDICTED:<br>non-symbiotic hemoglobin 1 [Ricinus communis]                                     | 26.452 | 34.161 | 31.9 | 8  | 16 | 8  | 0.979 | 0.979 | 0.974 | 1.03  | 1.065 | 1.003 | 1.057 | 8.81E-02 |
| cds.Camellia_sinensis.comp26139_c1_seq1_m.19052 | PREDICTED:<br>UDP-glucose 4-epimerase GEPI48 [Sesamum indicum]                                  | 37.964 | 139.53 | 51.1 | 15 | 39 | 14 | 0.974 | 0.94  | 0.941 | 1.059 | 1.092 | 1.045 | 1.119 | 2.98E-03 |

|                                                  |                                                                     |        |        |      |    |    |   |       |       |       |       |       |       |       |          |
|--------------------------------------------------|---------------------------------------------------------------------|--------|--------|------|----|----|---|-------|-------|-------|-------|-------|-------|-------|----------|
| cds.Camellia_sinensis.comp2615_7_c0_seq1_m.39234 | PREDICT ED: proteasome subunit beta type-1-like [Nicotiana tabacum] | 24.645 | 6.4214 | 32.3 | 6  | 9  | 2 | 0.938 | 0.973 | 0.983 | 1.082 | 1.023 | 1.006 | 1.075 | 5.15E-02 |
| cds.Camellia_sinensis.comp2615_7_c0_seq2_m.39673 | PREDICT ED: proteasome subunit beta type-1 [Ziziphus jujuba]        | 25.058 | 111.77 | 54.4 | 10 | 15 | 6 | 0.994 | 0.959 | 0.94  | 1.022 | 1.059 | 1.031 | 1.076 | 2.00E-02 |
| cds.Camellia_sinensis.comp2616_0_c0_seq1_m.26066 | PREDICT ED: probable alpha-amylase 2 [Jatropha curcas]              | 46.952 | 4.5604 | 6.3  | 3  | 3  | 3 | 1.097 | 0.953 | 0.976 | 0.972 | 0.982 | 1.015 | 0.981 | 7.23E-01 |
| cds.Camellia_sinensis.comp2616_8_c0_seq1_m.29601 | PREDICT ED: peroxidase 73 [Vitis vinifera]                          | 35.455 | 29.482 | 34.9 | 9  | 17 | 7 | 1.011 | 1.044 | 1.031 | 0.986 | 0.945 | 0.946 | 0.932 | 1.40E-02 |
| cds.Camellia_sinensis.comp2617_1_c0_seq2_m.40947 | PREDICT ED: NADPH--cytochrome P450 reductase 2 [Prunus mume]        | 20.603 | 4.2638 | 7.5  | 1  | 1  | 1 | 1.296 | 1.3   | 1.218 | 0.754 | 0.658 | 0.691 | 0.551 | 1.85E-04 |

|                                                  |                                                                                                                            |        |        |      |    |    |    |       |       |       |       |       |       |       |          |
|--------------------------------------------------|----------------------------------------------------------------------------------------------------------------------------|--------|--------|------|----|----|----|-------|-------|-------|-------|-------|-------|-------|----------|
| cds.Camellia_sinensis.comp2617_7_c0_seq1_m.41667 | PREDICT<br>ED: 60S<br>ribosomal<br>protein<br>L31<br>[Juglans regia]<br>E3                                                 | 14.069 | 19.705 | 33.1 | 3  | 3  | 3  | 1.113 | 1.042 | 1.099 | 0.951 | 0.87  | 0.913 | 0.84  | 5.96E-03 |
| cds.Camellia_sinensis.comp2617_8_c0_seq1_m.25671 | ubiquitin-<br>protein<br>ligase<br>[Arabidopsis thaliana]                                                                  | 52.465 | 13.562 | 8.9  | 4  | 5  | 4  | 1.016 | 0.858 | 0.981 | 0.951 | 0.985 | 1.166 | 1.087 | 3.73E-01 |
| cds.Camellia_sinensis.comp2618_1_c0_seq1_m.29403 | PREDICT<br>ED:<br>protein<br>LOW PSII<br>ACCUMULATION<br>3,<br>chloroplastic [Vitis vinifera]                              | 37.155 | 8.0744 | 8.6  | 3  | 6  | 3  | 1.007 | 0.993 | 1.016 | 0.987 | 1.024 | 0.992 | 0.996 | 7.57E-01 |
| cds.Camellia_sinensis.comp2618_4_c0_seq1_m.32281 | PREDICT<br>ED:<br>guanine<br>nucleotide-<br>binding<br>protein<br>subunit<br>beta-like<br>protein<br>[Erythranthe guttata] | 35.931 | 136.94 | 36.7 | 10 | 29 | 10 | 0.959 | 0.959 | 0.954 | 1.043 | 1.052 | 1.017 | 1.084 | 1.48E-03 |



|                                                  |                                                                                                    |        |        |      |    |    |    |       |       |       |       |       |       |       |          |
|--------------------------------------------------|----------------------------------------------------------------------------------------------------|--------|--------|------|----|----|----|-------|-------|-------|-------|-------|-------|-------|----------|
| cds.Camellia_sinensis.comp2618_7_c0_seq1_m.24832 | PREDICT<br>ED: 40S<br>ribosomal<br>protein S3a<br>[Sesamum indicum]                                | 29.806 | 68.408 | 48.7 | 10 | 22 | 10 | 1.097 | 1.12  | 1.091 | 0.845 | 0.876 | 0.866 | 0.782 | 5.51E-05 |
| cds.Camellia_sinensis.comp2619_1_c0_seq1_m.25177 | PREDICT<br>ED:<br>embryogen<br>esis-associated<br>protein EMB8<br>isoform X1<br>[Nelumbo nucifera] | 44.928 | 3.538  | 5.8  | 1  | 1  | 1  | 0.707 | 1.247 | 1.171 | 1.188 | 1.033 | 0.704 | 0.936 | 8.15E-01 |
| cds.Camellia_sinensis.comp2619_9_c0_seq1_m.17298 | PREDICT<br>ED: pto-interacting<br>protein 1<br>isoform X2<br>[Sesamum indicum]                     | 38.825 | 74.727 | 34.4 | 11 | 19 | 10 | 0.986 | 0.957 | 0.995 | 1.016 | 1.012 | 1.022 | 1.038 | 3.62E-02 |
| cds.Camellia_sinensis.comp2620_6_c0_seq2_m.39660 | PREDICT<br>ED:<br>binding<br>partner of ACD11 1<br>[Theobroma cacao]                               | 27.643 | 22.639 | 31.5 | 8  | 13 | 6  | 1.103 | 1.02  | 1.045 | 0.97  | 0.957 | 0.945 | 0.907 | 1.60E-02 |
| cds.Camellia_sinensis.comp2620_6_c0_seq3_m.40252 | PREDICT<br>ED:<br>binding<br>partner of ACD11 1<br>[Theobroma cacao]                               | 27.591 | 12.816 | 25.6 | 7  | 10 | 6  | 0.985 | 0.966 | 0.997 | 0.972 | 1.055 | 1.045 | 1.042 | 2.13E-01 |

|                                                 |                                                                                                                                                                                                           |        |        |      |   |    |   |       |       |       |       |       |       |       |          |
|-------------------------------------------------|-----------------------------------------------------------------------------------------------------------------------------------------------------------------------------------------------------------|--------|--------|------|---|----|---|-------|-------|-------|-------|-------|-------|-------|----------|
| cds.Camellia_sinensis.comp26210_c0_seq1_m.33336 | PREDICT<br>ED:<br>protein<br>SGT1<br>homolog<br>A-like<br>[Jatropha<br>curcas]<br>PREDICT<br>ED:<br>protein<br>SLOW<br>GREEN 1,<br>chloroplast<br>ic-like<br>isoform<br>X2<br>[Gossypium<br>hirsutum]     | 36.949 | 14.116 | 26.7 | 9 | 10 | 8 | 0.973 | 0.959 | 0.971 | 1.036 | 1.001 | 1.041 | 1.06  | 1.13E-02 |
| cds.Camellia_sinensis.comp26219_c0_seq1_m.29148 | PREDICT<br>ED:<br>protein<br>SLOW<br>GREEN 1,<br>chloroplast<br>ic-like<br>isoform<br>X2<br>[Gossypium<br>hirsutum]                                                                                       | 45.082 | 4.3655 | 7.6  | 3 | 3  | 3 | 0.957 | 0.898 | 0.947 | 1.096 | 1.082 | 1.052 | 1.153 | 3.52E-03 |
| cds.Camellia_sinensis.comp26222_c0_seq1_m.35005 | PREDICT<br>ED:<br>GDT1-like<br>protein 4<br>[Cucumis<br>melo]<br>PREDICT<br>ED:<br>isocitrate<br>dehydroge<br>nase<br>[NAD]<br>regulatory<br>subunit 1,<br>mitochond<br>rial<br>isoform<br>X1<br>[Ricinus | 24.773 | 1.5575 | 3.9  | 1 | 1  | 1 | 0.981 | 0.977 | 0.983 | 1.061 | 0.978 | 1.037 | 1.046 | 2.10E-01 |
| cds.Camellia_sinensis.comp26231_c0_seq1_m.27340 | PREDICT<br>ED:<br>isocitrate<br>dehydroge<br>nase<br>[NAD]<br>regulatory<br>subunit 1,<br>mitochond<br>rial<br>isoform<br>X1<br>[Ricinus                                                                  | 40.735 | 51.525 | 25   | 9 | 16 | 9 | 0.976 | 0.998 | 0.986 | 1.036 | 1.015 | 1.034 | 1.042 | 1.07E-02 |

|                                                  |                                                                                                    |        |        |      |   |    |   |       |       |       |       |       |       |       |          |
|--------------------------------------------------|----------------------------------------------------------------------------------------------------|--------|--------|------|---|----|---|-------|-------|-------|-------|-------|-------|-------|----------|
| cds.Camellia_sinensis.comp2623_2_c0_seq3_m.36763 | DNA-binding protein [Medicago truncatula]                                                          | 24.035 | 2.8459 | 5.1  | 1 | 1  | 1 | 0.98  | 1.047 | 1.134 | 0.96  | 0.947 | 0.933 | 0.898 | 7.04E-02 |
| cds.Camellia_sinensis.comp2623_6_c1_seq1_m.48309 | bifunctional dTDP-4-dehydrorhamnose                                                                | 18.403 | 4.3686 | 10.6 | 1 | 1  | 1 |       |       |       |       |       |       |       |          |
| cds.Camellia_sinensis.comp2624_6_c0_seq1_m.30448 | 3,5-epimerase/dTDP-4-dehydrorhamnose reductase-like [Gossypium PREDICTED: 3-deoxymannooctulosonate | 35.01  | 7.5402 | 13.8 | 4 | 5  | 3 | 1.053 | 1.05  | 1.026 | 0.914 | 1.018 | 0.932 | 0.915 | 5.87E-02 |
| cds.Camellia_sinensis.comp2624_8_c0_seq1_m.28827 | cytidyltransferase, mitochondrial-like isoform X1 [Nicotiana attenuata]                            | 34.261 | 105.94 | 32.6 | 6 | 11 | 6 | 0.998 | 0.978 | 0.982 | 1.015 | 1.014 | 0.992 | 1.021 | 9.58E-02 |

|                                                 |                                                                                               |        |        |      |    |    |    |       |       |       |       |       |       |       |          |
|-------------------------------------------------|-----------------------------------------------------------------------------------------------|--------|--------|------|----|----|----|-------|-------|-------|-------|-------|-------|-------|----------|
| cds.Camellia_sinensis.comp26250_c0_seq1_m.2532  | PREDICT<br>ED: starch synthase 3, chloroplast ic/amyloplastic isoform X1<br>[Ziziphus jujuba] | 83.105 | 47.688 | 21.2 | 12 | 13 | 12 | 1.055 | 1.097 | 1.072 | 0.909 | 0.914 | 0.91  | 0.848 | 4.78E-03 |
| cds.Camellia_sinensis.comp26250_c0_seq1_m.2533  | PREDICT<br>ED: starch synthase 3, chloroplast ic/amyloplastic [Vitis vinifera]                | 62.555 | 13.859 | 11.7 | 6  | 7  | 6  | 1.182 | 1.131 | 1.058 | 0.849 | 0.829 | 0.917 | 0.77  | 4.12E-03 |
| cds.Camellia_sinensis.comp26251_c0_seq1_m.32703 | Glutelin type-B 5 [Morus notabilis]                                                           | 39.432 | 54.639 | 30.6 | 11 | 18 | 11 | 0.909 | 0.925 | 0.921 | 1.077 | 1.076 | 1.09  | 1.177 | 1.84E-05 |
| cds.Camellia_sinensis.comp26252_c0_seq1_m.25284 | PREDICT<br>ED: beta-glucosidase 12-like [Nicotiana sylvestris]                                | 56.574 | 24.816 | 12   | 6  | 9  | 5  | 1.011 | 0.973 | 0.967 | 1.039 | 1.005 | 1.026 | 1.04  | 7.97E-02 |
| cds.Camellia_sinensis.comp26255_c0_seq2_m.14870 | PREDICT<br>ED: peptidyl-prolyl cis-trans isomerase FKBP20-1 isoform X1<br>[Nelumbo nucifera]  | 20.505 | 4.3603 | 6.4  | 1  | 1  | 1  | 1.112 | 1.17  | 1.064 | 0.903 | 0.839 | 0.884 | 0.785 | 2.32E-03 |

|                                                 |                                                                                         |        |        |      |   |    |   |       |       |       |       |       |       |       |          |
|-------------------------------------------------|-----------------------------------------------------------------------------------------|--------|--------|------|---|----|---|-------|-------|-------|-------|-------|-------|-------|----------|
| cds.Camellia_sinensis.comp26268_c0_seq1_m.37228 | PREDICT<br>ED:<br>probable protein phosphatase 2C 58 [Sesamum indicum]                  | 31.569 | 10.595 | 10.8 | 3 | 5  | 1 | 0.965 | 0.874 | 1.065 | 1.041 | 1.013 | 1.063 | 1.073 | 2.77E-01 |
| cds.Camellia_sinensis.comp26270_c0_seq1_m.8002  | PREDICT<br>ED: casein kinase 1-like protein HD16 isoform X2 [Ipomoea nil]               | 78.982 | 1.5441 | 2.1  | 1 | 1  | 1 | 0.997 | 0.859 | 1.104 | 0.986 | 1.017 | 1.05  | 1.031 | 6.58E-01 |
| cds.Camellia_sinensis.comp26273_c0_seq1_m.33649 | PREDICT<br>ED:<br>adenylate kinase, chloroplastic-like [Populus euphratica]             | 33.475 | 28.9   | 21.3 | 6 | 14 | 5 | 0.99  | 1.034 | 0.937 | 1.013 | 0.992 | 1.002 | 1.016 | 6.08E-01 |
| cds.Camellia_sinensis.comp26283_c0_seq1_m.30031 | PREDICT<br>ED: signal recognition particle receptor subunit beta-like [Sesamum indicum] | 29.25  | 16.622 | 23.4 | 5 | 9  | 5 | 0.982 | 0.951 | 0.947 | 1.103 | 0.987 | 1.047 | 1.089 | 6.81E-02 |

|                                                 |                                                                             |        |        |      |    |    |    |       |       |       |       |       |       |       |          |
|-------------------------------------------------|-----------------------------------------------------------------------------|--------|--------|------|----|----|----|-------|-------|-------|-------|-------|-------|-------|----------|
| cds.Camellia_sinensis.comp26285_c0_seq1_m.46008 | PREDICT<br>ED:<br>glutathione S-transferase T1 [Ricinus communis]           | 19.873 | 10.854 | 14.1 | 2  | 2  | 2  | 0.99  | 0.986 | 1.066 | 0.957 | 1.016 | 0.992 | 0.975 | 4.57E-01 |
| cds.Camellia_sinensis.comp26288_c0_seq1_m.43846 | PREDICT<br>ED:<br>subtilisin-like protease SBT3.11 [Pyrus x bretschneideri] | 14.398 | 36.904 | 34.1 | 4  | 7  | 4  | 0.945 | 0.92  | 0.901 | 1.095 | 1.104 | 1.134 | 1.205 | 4.24E-04 |
| cds.Camellia_sinensis.comp26290_c0_seq1_m.21347 | PREDICT<br>ED:<br>eukaryotic initiation factor 4A-3 [Vitis vinifera]        | 46.559 | 78.079 | 33.5 | 16 | 28 | 14 | 0.971 | 0.961 | 0.977 | 1.031 | 1.021 | 1.037 | 1.062 | 8.19E-04 |
| cds.Camellia_sinensis.comp26296_c0_seq1_m.39538 | PREDICT<br>ED:<br>phosphopantetheine adenylyltransferase [Theobroma cacao]  | 26.013 | 19.037 | 30.8 | 7  | 9  | 7  | 0.988 | 1.026 | 0.97  | 1.025 | 0.996 | 1.012 | 1.016 | 4.23E-01 |
| cds.Camellia_sinensis.comp26305_c0_seq1_m.2721  | PREDICT<br>ED:<br>protein TPLATE [Ipomoea nil]                              | 101.42 | 7.7555 | 3.2  | 2  | 2  | 2  | 1.148 | 1.054 | 0.924 | 0.896 | 0.98  | 0.978 | 0.913 | 2.76E-01 |

|                                                  |                                                                          |        |        |      |    |    |    |       |       |       |       |       |       |       |          |
|--------------------------------------------------|--------------------------------------------------------------------------|--------|--------|------|----|----|----|-------|-------|-------|-------|-------|-------|-------|----------|
| cds.Camellia_sinensis.comp2630_9_c0_seq1_m.35452 | PREDICTED: mitochondrial import receptor subunit TOM20 [Vitis vinifera]  | 27.97  | 57.458 | 37.2 | 10 | 15 | 10 | 0.915 | 0.958 | 0.969 | 1.044 | 1.093 | 1.092 | 1.136 | 5.28E-03 |
| cds.Camellia_sinensis.comp2632_2_c0_seq3_m.1497  | PREDICTED: ARF guanine-nucleotide exchange factor GNOM [Jatropha curcas] | 139.95 | 1.9317 | 2.2  | 3  | 3  | 3  | 1.193 | 0.963 | 1.029 | 0.957 | 0.879 | 0.955 | 0.876 | 1.36E-01 |
| cds.Camellia_sinensis.comp2633_6_c0_seq1_m.25208 | PREDICTED: glutamate dehydrogenase 2 [Theobroma cacao]                   | 47.284 | 9.4171 | 13.9 | 5  | 7  | 2  | 0.96  | 1.212 | 0.925 | 0.97  | 0.977 | 0.958 | 0.938 | 5.72E-01 |
| cds.Camellia_sinensis.comp2636_5_c0_seq1_m.37925 | PREDICTED: aldose 1-epimerase-like [Nicotiana tabacum]                   | 34.723 | 12.984 | 17.5 | 6  | 9  | 6  | 0.972 | 0.936 | 0.924 | 1.028 | 1.04  | 1.086 | 1.114 | 8.86E-03 |

|                                                  |                                                                                                       |        |        |      |    |    |    |       |       |       |       |       |       |       |          |
|--------------------------------------------------|-------------------------------------------------------------------------------------------------------|--------|--------|------|----|----|----|-------|-------|-------|-------|-------|-------|-------|----------|
| cds.Camellia_sinensis.comp2637_7_c0_seq1_m.30105 | PREDICTED:<br>protein<br>farnesyltransferase/geranyltransferase type-1 subunit alpha [Vitis vinifera] | 28.17  | 24.113 | 18.3 | 4  | 4  | 4  | 0.943 | 0.992 | 0.986 | 1.044 | 1.029 | 1.023 | 1.06  | 2.68E-02 |
| cds.Camellia_sinensis.comp2638_4_c0_seq1_m.38788 | PREDICTED: 40S ribosomal protein S12 [Nelumbo nucifera]                                               | 15.184 | 18.403 | 56.2 | 6  | 11 | 3  | 1.021 | 0.983 | 1.141 | 0.968 | 0.838 | 1.043 | 0.906 | 2.67E-01 |
| cds.Camellia_sinensis.comp2638_4_c0_seq2_m.39037 | PREDICTED: 40S ribosomal protein S12 [Nelumbo nucifera]                                               | 15.152 | 27.678 | 62.5 | 7  | 12 | 4  | 0.959 | 0.986 | 0.959 | 1.025 | 1.08  | 1.013 | 1.074 | 3.12E-02 |
| cds.Camellia_sinensis.comp2638_8_c0_seq1_m.18287 | PREDICTED:<br>probable transaldolase [Sesamum indicum]                                                | 48.969 | 95.198 | 35.3 | 13 | 20 | 13 | 0.954 | 1.013 | 0.974 | 1.042 | 1.037 | 1.015 | 1.052 | 5.80E-02 |



|                                |                   |                                                                                                                          |        |        |      |   |    |   |       |       |       |       |       |       |       |          |
|--------------------------------|-------------------|--------------------------------------------------------------------------------------------------------------------------|--------|--------|------|---|----|---|-------|-------|-------|-------|-------|-------|-------|----------|
| cds.Camellia_sinensis.comp2638 | 9_c0_seq1_m.39277 | PREDICTED:<br>ESCRT-related protein<br>CHMP1B-like<br>[Nelumbo nucifera]                                                 | 22.603 | 28.494 | 32.5 | 7 | 8  | 7 | 1.042 | 1.06  | 1.064 | 0.979 | 0.914 | 0.951 | 0.898 | 6.78E-03 |
| cds.Camellia_sinensis.comp2639 | 8_c0_seq2_m.42894 | PREDICTED:<br>miraculin<br>[Theobroma cacao]                                                                             | 24.856 | 4.7454 | 9.9  | 2 | 3  | 2 | 0.733 | 0.826 | 0.764 | 1.235 | 1.352 | 1.182 | 1.622 | 7.95E-04 |
| cds.Camellia_sinensis.comp2640 | 1_c0_seq4_m.10602 | PREDICTED:<br>uncharacterized aarF domain-containing protein kinase<br>At1g79600,<br>chloroplastic<br>[Nicotiana glauca] | 80.481 | 8.1099 | 6.8  | 5 | 5  | 4 |       |       |       |       |       |       |       |          |
| cds.Camellia_sinensis.comp2640 | 4_c0_seq1_m.35741 | PREDICTED:<br>superoxide dismutase [Fe],<br>chloroplastic [Vitis vinifera]                                               | 34.096 | 33.438 | 22.7 | 6 | 11 | 6 | 1.011 | 0.999 | 0.963 | 0.966 | 1.044 | 1.013 | 1.017 | 5.76E-01 |

|                                |                                                                                                |        |        |      |   |    |   |       |       |       |       |       |       |       |          |
|--------------------------------|------------------------------------------------------------------------------------------------|--------|--------|------|---|----|---|-------|-------|-------|-------|-------|-------|-------|----------|
| cds.Camellia_sinensis.comp2640 | PREDICT ED: eukaryotic translation initiation factor [Vitis vinifera]                          | 22.537 | 21.756 | 23.2 | 5 | 7  | 5 | 0.954 | 0.984 | 0.977 | 1.025 | 1.006 | 1.009 | 1.043 | 1.88E-02 |
| cds.Camellia_sinensis.comp2640 | PREDICT ED: brain acid soluble protein 1 homolog [Pyrus x bretschneideri]                      | 17.82  | 8.249  | 7.3  | 1 | 1  | 1 | 0.911 | 0.924 | 0.917 | 1.162 | 1.025 | 1.1   | 1.194 | 4.04E-02 |
| cds.Camellia_sinensis.comp2641 | PREDICT ED: vacuolar protein-sorting associated protein 11 homolog isoform X3 [Vitis vinifera] | 108.63 | 10.183 | 8    | 8 | 9  | 8 | 1.04  | 0.988 | 1.039 | 0.987 | 0.972 | 0.978 | 0.958 | 6.99E-02 |
| cds.Camellia_sinensis.comp2641 | PREDICT ED: probable xyloglucan endotransglucosylase/hydrolase protein 6 [Juglans regia]       | 32.893 | 26.298 | 26.8 | 8 | 11 | 6 | 1.24  | 1.256 | 1.279 | 0.758 | 0.72  | 0.685 | 0.573 | 5.66E-05 |

|                                                  |                                                                |        |        |     |   |   |   |       |       |       |       |       |       |       |          |
|--------------------------------------------------|----------------------------------------------------------------|--------|--------|-----|---|---|---|-------|-------|-------|-------|-------|-------|-------|----------|
|                                                  | PREDICT                                                        |        |        |     |   |   |   |       |       |       |       |       |       |       |          |
|                                                  | ED:                                                            |        |        |     |   |   |   |       |       |       |       |       |       |       |          |
| cds.Camellia_sinensis.comp2642_1_c0_seq2_m.36917 | peptidyl-prolyl cis-trans isomerase CYP23 [Populus euphratica] | 26.056 | 1.1538 | 4.3 | 1 | 1 | 1 | 1.042 | 0.983 | 1.005 | 0.98  | 0.949 | 1.042 | 0.981 | 5.66E-01 |
|                                                  | PREDICT                                                        |        |        |     |   |   |   |       |       |       |       |       |       |       |          |
|                                                  | ED:                                                            |        |        |     |   |   |   |       |       |       |       |       |       |       |          |
| cds.Camellia_sinensis.comp2642_9_c0_seq1_m.30304 | protein SLOW GREEN 1, chloroplast ic-like [Nelumbo nucifera]   | 37.781 | 6.4794 | 9.3 | 3 | 4 | 3 | 0.912 | 1.008 | 0.974 | 1.049 | 1.033 | 1.051 | 1.083 | 5.50E-02 |
|                                                  | PREDICT                                                        |        |        |     |   |   |   |       |       |       |       |       |       |       |          |
|                                                  | ED: signal                                                     |        |        |     |   |   |   |       |       |       |       |       |       |       |          |
| cds.Camellia_sinensis.comp2643_3_c0_seq1_m.39369 | peptidase complex subunit 3B [Arachis ipaensis]                | 19.062 | 8.4826 | 6.6 | 1 | 1 | 1 | 0.986 | 0.918 | 0.95  | 1.044 | 1.079 | 1.046 | 1.11  | 1.07E-02 |
|                                                  | PREDICT                                                        |        |        |     |   |   |   |       |       |       |       |       |       |       |          |
|                                                  | ED:                                                            |        |        |     |   |   |   |       |       |       |       |       |       |       |          |
| cds.Camellia_sinensis.comp2644_1_c0_seq1_m.17335 | protein DETOXIFICATION 40-like [Daucus carota subsp. sativus]  | 59.44  | 2.5212 | 3.8 | 2 | 2 | 2 | 1.05  | 1.075 | 1.09  | 0.828 | 0.826 | 1.107 | 0.859 | 2.40E-01 |

|                                                  |                                                                                                                                 |        |        |      |    |    |    |       |       |       |       |       |       |       |          |
|--------------------------------------------------|---------------------------------------------------------------------------------------------------------------------------------|--------|--------|------|----|----|----|-------|-------|-------|-------|-------|-------|-------|----------|
|                                                  | PREDICT<br>ED:                                                                                                                  |        |        |      |    |    |    |       |       |       |       |       |       |       |          |
| cds.Camellia_sinensis.comp2644_3_c0_seq1_m.27088 | guanylate kinase 2, chloroplast ic/mitochondrial [Ipomoea nil] import inner membrane translocase subunit [Arabidopsis thaliana] | 33.997 | 3.1263 | 5.9  | 2  | 2  | 2  | 0.943 | 0.941 | 0.91  | 1.069 | 1.115 | 1.054 | 1.159 | 1.98E-03 |
| cds.Camellia_sinensis.comp2644_7_c0_seq1_m.21594 | PREDICT<br>ED:<br>nitrilase-like protein 2 isoform X1 [Solanum pennellii]                                                       | 41.221 | 20.511 | 19.9 | 6  | 7  | 6  | 1.035 | 1.034 | 0.947 | 0.959 | 1.17  | 1.015 | 1.042 | 5.88E-01 |
| cds.Camellia_sinensis.comp2645_1_c0_seq1_m.29519 | PREDICT<br>ED:<br>chaperone protein DnaJ-like [Gossypium hirsutum]                                                              | 35.051 | 224.18 | 67.1 | 18 | 44 | 16 | 1.019 | 1.024 | 1.007 | 0.981 | 0.986 | 0.973 | 0.964 | 4.30E-03 |
| cds.Camellia_sinensis.comp2645_3_c0_seq1_m.38607 |                                                                                                                                 | 13.938 | 4.1846 | 18.3 | 3  | 3  | 3  | 0.943 | 0.935 | 0.957 | 1.033 | 1.083 | 1.077 | 1.126 | 1.92E-03 |

|                                                  |                                                                                                                   |        |        |      |    |    |   |       |       |       |       |       |       |       |          |
|--------------------------------------------------|-------------------------------------------------------------------------------------------------------------------|--------|--------|------|----|----|---|-------|-------|-------|-------|-------|-------|-------|----------|
| cds.Camellia_sinensis.comp2645_5_c0_seq1_m.33143 | PREDICT<br>ED:<br>proline--<br>tRNA<br>ligase,<br>cytoplasmic [Arachis<br>ipaensis]                               | 45.73  | 11.776 | 30   | 10 | 13 | 4 | 1.066 | 1.06  | 1.088 | 0.901 | 0.938 | 0.954 | 0.869 | 1.68E-03 |
| cds.Camellia_sinensis.comp2645_5_c1_seq1_m.45521 | PREDICT<br>ED:<br>proline--<br>tRNA<br>ligase,<br>cytoplasmic-like<br>[Nelumbo<br>nucifera]<br>dimethylal<br>lyl, | 17.849 | 18.132 | 34   | 5  | 5  | 3 | 1.167 | 1.049 | 1.073 | 0.802 | 0.936 | 0.879 | 0.796 | 1.43E-02 |
| cds.Camellia_sinensis.comp2645_8_c0_seq2_m.35806 | adenosine<br>tRNA<br>methylthio<br>transferase<br>[Arabidop<br>sis<br>thaliana]                                   | 27.97  | 75.965 | 28.4 | 7  | 17 | 7 | 0.993 | 0.964 | 0.982 | 0.993 | 1.034 | 1.009 | 1.033 | 9.06E-02 |
| cds.Camellia_sinensis.comp2646_0_c0_seq1_m.7641  | PREDICT<br>ED: ferric<br>reduction<br>oxidase 7,<br>chloroplast<br>ic isoform<br>X1 [Vitis<br>vinifera]           | 83.622 | 31.494 | 8.9  | 6  | 7  | 6 | 1.031 | 1.042 | 1.059 | 0.938 | 0.953 | 0.944 | 0.905 | 3.84E-04 |



|                                                  |                                                                                               |        |        |      |    |    |   |       |       |       |       |       |       |       |          |
|--------------------------------------------------|-----------------------------------------------------------------------------------------------|--------|--------|------|----|----|---|-------|-------|-------|-------|-------|-------|-------|----------|
| cds.Camellia_sinensis.comp2649_0_c0_seq1_m.14796 | PREDICTED:<br>carboxyl-terminal-processing peptidase 3,<br>chloroplastic<br>[Sesamum indicum] | 59.942 | 11.041 | 7.8  | 4  | 5  | 4 | 0.973 | 1.025 | 1.004 | 1.024 | 0.995 | 0.99  | 1.002 | 9.01E-01 |
| cds.Camellia_sinensis.comp2649_3_c0_seq1_m.11502 | PREDICTED:<br>mitochondrial Rho GTPase 1<br>[Vitis vinifera]                                  | 71.486 | 26.78  | 16.7 | 11 | 14 | 9 | 0.991 | 0.987 | 1.026 | 0.987 | 1.019 | 0.985 | 0.996 | 8.07E-01 |
| cds.Camellia_sinensis.comp2649_5_c1_seq2_m.22967 | PREDICTED:<br>nucleoside diphosphate kinase 19,<br>chloroplastic<br>[Solanum tuberosum]       | 21.613 | 34.288 | 25.5 | 5  | 6  | 5 | 1.121 | 0.961 | 0.989 | 1.064 | 0.794 | 1.063 | 0.951 | 6.27E-01 |
| cds.Camellia_sinensis.comp2649_5_c1_seq2_m.22968 | PREDICTED:<br>nucleoside diphosphate kinase 19,<br>chloroplastic-like<br>[Malus domestica]    | 21.464 | 15.087 | 15.6 | 3  | 3  | 3 | 1.02  | 0.982 | 0.997 | 1.014 | 0.998 | 1     | 1.004 | 7.34E-01 |

|                                                  |                                                                  |        |        |      |    |    |    |       |       |       |       |       |       |       |          |
|--------------------------------------------------|------------------------------------------------------------------|--------|--------|------|----|----|----|-------|-------|-------|-------|-------|-------|-------|----------|
|                                                  | PREDICT                                                          |        |        |      |    |    |    |       |       |       |       |       |       |       |          |
|                                                  | ED:                                                              |        |        |      |    |    |    |       |       |       |       |       |       |       |          |
|                                                  | probable                                                         |        |        |      |    |    |    |       |       |       |       |       |       |       |          |
| cds.Camellia_sinensis.comp2649_8_c0_seq1_m.17905 | 26S proteasome non-ATPase regulatory subunit 3 [Vitis vinifera]  | 55.354 | 107.85 | 41.1 | 18 | 30 | 18 | 0.996 | 1     | 1.018 | 1.002 | 1.024 | 0.961 | 0.991 | 6.63E-01 |
|                                                  | PREDICT                                                          |        |        |      |    |    |    |       |       |       |       |       |       |       |          |
|                                                  | ED:                                                              |        |        |      |    |    |    |       |       |       |       |       |       |       |          |
| cds.Camellia_sinensis.comp2650_4_c0_seq2_m.48391 | replication factor C subunit 2 [Lupinus angustifolius]           | 16.02  | 18.242 | 28.4 | 3  | 3  | 3  | 0.986 | 0.945 | 0.934 | 1.106 | 1.036 | 1.018 | 1.103 | 3.16E-02 |
|                                                  | PREDICT                                                          |        |        |      |    |    |    |       |       |       |       |       |       |       |          |
|                                                  | ED:                                                              |        |        |      |    |    |    |       |       |       |       |       |       |       |          |
| cds.Camellia_sinensis.comp2650_6_c0_seq1_m.23107 | altered inheritance of mitochondrial protein 32 [Vitis vinifera] | 44.506 | 53.279 | 21.8 | 8  | 22 | 7  | 1.077 | 1.077 | 1.052 | 0.913 | 0.923 | 0.904 | 0.855 | 9.56E-05 |
|                                                  | PREDICT                                                          |        |        |      |    |    |    |       |       |       |       |       |       |       |          |
|                                                  | ED:                                                              |        |        |      |    |    |    |       |       |       |       |       |       |       |          |
| cds.Camellia_sinensis.comp2651_2_c0_seq1_m.11629 | chaperone protein DnaJ [Citrus sinensis]                         | 34.913 | 49.411 | 31.8 | 8  | 11 | 8  | 1.042 | 1.05  | 1.092 | 0.926 | 0.947 | 0.936 | 0.882 | 1.40E-03 |



|                                                 |                                                                                        |        |        |      |    |    |    |       |       |       |       |       |       |       |          |
|-------------------------------------------------|----------------------------------------------------------------------------------------|--------|--------|------|----|----|----|-------|-------|-------|-------|-------|-------|-------|----------|
| cds.Camellia_sinensis.comp26513_c0_seq2_m.30635 | PREDICTED: THO complex subunit 3 [Sesamum indicum]                                     | 35.12  | 4.2404 | 6.4  | 2  | 2  | 2  | 1.014 | 1.001 | 1.083 | 0.991 | 1.001 | 0.915 | 0.938 | 1.63E-01 |
| cds.Camellia_sinensis.comp26525_c0_seq1_m.24481 | PREDICTED: 26S protease regulatory subunit S10B homolog B [Vigna radiata var. radiata] | 44.597 | 124.64 | 49.5 | 18 | 32 | 17 | 0.991 | 0.987 | 0.964 | 1.043 | 1.006 | 1.029 | 1.046 | 2.94E-02 |
| cds.Camellia_sinensis.comp26526_c0_seq2_m.10699 | PREDICTED: actin-related protein 5-like isoform X2 [Juglans regia]                     | 35.546 | 1.2195 | 3.2  | 1  | 1  | 1  |       |       |       |       |       |       |       |          |
| cds.Camellia_sinensis.comp26531_c0_seq1_m.8009  | PREDICTED: phospholipase D alpha 1 [Sesamum indicum]                                   | 101.33 | 104.61 | 33   | 27 | 40 | 23 | 0.968 | 0.968 | 0.959 | 1.046 | 1.005 | 1.065 | 1.076 | 1.36E-02 |

|                                |                                                                                                            |        |        |      |   |    |   |       |       |       |       |       |       |       |          |
|--------------------------------|------------------------------------------------------------------------------------------------------------|--------|--------|------|---|----|---|-------|-------|-------|-------|-------|-------|-------|----------|
| cds.Camellia_sinensis.comp2654 | PREDICTED:<br>probable mediator of RNA polymerase II transcription subunit 37c, partial [Raphanus sativus] | 16.527 | 3.4618 | 19.9 | 3 | 7  | 1 | 0.944 | 0.972 | 1.242 | 0.901 | 0.914 | 1.028 | 0.9   | 3.63E-01 |
| cds.Camellia_sinensis.comp2655 | PREDICTED: GPI transamidase component PIG-T [Vitis vinifera]                                               | 74.92  | 1.9067 | 1.3  | 1 | 3  | 1 | 1.025 | 0.983 | 1.035 | 0.94  | 1.046 | 0.986 | 0.977 | 5.22E-01 |
| cds.Camellia_sinensis.comp2655 | PREDICTED: 60S ribosomal protein L28-2-like [Nelumbo nucifera]                                             | 19.166 | 18.148 | 32.2 | 6 | 10 | 6 | 1.141 | 1.081 | 1.164 | 0.847 | 0.835 | 0.855 | 0.749 | 2.40E-04 |
| cds.Camellia_sinensis.comp2655 | PREDICTED: phenylalanine ammonia-lyase [Nelumbo nucifera]                                                  | 14.501 | 3.5862 | 33.8 | 4 | 4  | 2 | 1.442 | 1.345 | 1.454 | 0.473 | 0.552 | 0.597 | 0.382 | 1.83E-04 |



|                                                                                                                                  |                   |        |        |      |    |    |    |       |       |       |       |       |       |       |          |
|----------------------------------------------------------------------------------------------------------------------------------|-------------------|--------|--------|------|----|----|----|-------|-------|-------|-------|-------|-------|-------|----------|
| cds.Camellia_sinensis.comp2659                                                                                                   | 2_c1_seq1_m.15592 | 57.088 | 109.51 | 26.4 | 11 | 20 | 11 | 1.009 | 0.987 | 0.973 | 0.996 | 1.008 | 1.015 | 1.017 | 2.32E-01 |
| PREDICTED:<br>betaine aldehyde dehydrogenase 1, chloroplastic [Ziziphus jujuba]                                                  |                   |        |        |      |    |    |    |       |       |       |       |       |       |       |          |
| cds.Camellia_sinensis.comp2660                                                                                                   | 4_c0_seq4_m.22113 | 47.181 | 8.6407 | 13.6 | 5  | 5  | 5  | 0.976 | 1.123 | 1.047 | 1.001 | 0.918 | 0.937 | 0.908 | 1.18E-01 |
| PREDICTED:<br>phosphatidylinositol 3,4,5-trisphosphate 3-phosphatase and protein-tyrosine-phosphatase [PTEN2A[Ricinus communis]] |                   |        |        |      |    |    |    |       |       |       |       |       |       |       |          |
| cds.Camellia_sinensis.comp2661                                                                                                   | 0_c0_seq1_m.1613  | 136.05 | 1.8935 | 3.3  | 4  | 4  | 2  |       |       |       |       |       |       |       |          |
| PREDICTED: ABC transporter B family member 19 [Ricinus                                                                           |                   |        |        |      |    |    |    |       |       |       |       |       |       |       |          |



|                                |                                                                                                     |                   |        |        |      |    |    |    |       |       |       |       |       |       |       |          |
|--------------------------------|-----------------------------------------------------------------------------------------------------|-------------------|--------|--------|------|----|----|----|-------|-------|-------|-------|-------|-------|-------|----------|
| cds.Camellia_sinensis.comp2663 | PREDICTED: non-functional NADPH-dependent codeinone reductase 2-like [Daucus carota subsp. sativus] | 1_c0_seq1_m.33058 | 36.923 | 145.33 | 55.2 | 18 | 56 | 16 | 0.924 | 0.934 | 0.942 | 1.063 | 1.084 | 1.064 | 1.147 | 8.28E-05 |
| cds.Camellia_sinensis.comp2664 | PREDICTED: endonuclease 1 [Nicotiana attenuata]                                                     | 0_c0_seq1_m.35494 | 35.181 | 3.5282 | 2.3  | 1  | 1  | 1  | 1.014 | 1.011 | 1.067 | 0.96  | 0.972 | 0.978 | 0.941 | 3.01E-02 |
| cds.Camellia_sinensis.comp2664 | saccharopine dehydrogenase [Medicago truncatula]                                                    | 6_c0_seq1_m.24007 | 33.778 | 39.351 | 15.9 | 5  | 7  | 5  | 0.957 | 0.956 | 0.992 | 1.056 | 1.004 | 1.071 | 1.078 | 3.18E-02 |
| cds.Camellia_sinensis.comp2664 | Saccharopine dehydrogenase [Arabidopsis thaliana]                                                   | 6_c0_seq1_m.24008 | 17.77  | 7.0217 | 10.6 | 1  | 1  | 1  |       |       |       |       |       |       |       |          |
| cds.Camellia_sinensis.comp2665 | PREDICTED: protein BTR1 isoform X2 [Vitis vinifera]                                                 | 2_c1_seq1_m.22429 | 34.778 | 42.686 | 26.6 | 8  | 11 | 6  | 0.984 | 1.032 | 1.047 | 0.962 | 0.954 | 0.965 | 0.941 | 3.30E-02 |

|                                                  |                                                                                       |        |        |      |   |    |   |       |       |       |       |       |       |       |          |
|--------------------------------------------------|---------------------------------------------------------------------------------------|--------|--------|------|---|----|---|-------|-------|-------|-------|-------|-------|-------|----------|
|                                                  | PREDICT                                                                               |        |        |      |   |    |   |       |       |       |       |       |       |       |          |
| cds.Camellia_sinensis.comp2665_2_c1_seq3_m.38958 | ED: protein BTR1 isoform X2 [Vitis vinifera]                                          | 26.963 | 9.3883 | 26   | 6 | 7  | 4 | 1.093 | 0.839 | 0.735 | 1.072 | 1.143 | 1.138 | 1.257 | 1.10E-01 |
|                                                  | PREDICT                                                                               |        |        |      |   |    |   |       |       |       |       |       |       |       |          |
| cds.Camellia_sinensis.comp2665_3_c0_seq1_m.18036 | ED: transducin beta-like protein 2 [Nicotiana sylvestris]                             | 46.342 | 23.642 | 14   | 5 | 8  | 5 | 1.004 | 1.042 | 1.033 | 1.076 | 0.923 | 0.964 | 0.962 | 4.39E-01 |
|                                                  | PREDICT                                                                               |        |        |      |   |    |   |       |       |       |       |       |       |       |          |
| cds.Camellia_sinensis.comp2666_4_c0_seq1_m.10560 | ED: N6-adenosine-methyltransferase MT-A70-like [Vitis vinifera]                       | 80.741 | 5.5668 | 4.1  | 3 | 3  | 3 | 1.053 | 1.095 | 1.001 | 1.048 | 0.99  | 0.814 | 0.906 | 2.67E-01 |
|                                                  | PREDICT                                                                               |        |        |      |   |    |   |       |       |       |       |       |       |       |          |
| cds.Camellia_sinensis.comp2666_4_c1_seq1_m.34799 | ED: ATP-dependent Clp protease proteolytic subunit 4, chloroplastic [Theobroma cacao] | 26.034 | 52.37  | 30.3 | 9 | 19 | 9 | 1.027 | 1.02  | 0.987 | 0.982 | 1.01  | 0.991 | 0.983 | 3.18E-01 |

|                                                  |                                                                             |        |        |      |    |    |   |       |       |       |       |       |       |       |          |
|--------------------------------------------------|-----------------------------------------------------------------------------|--------|--------|------|----|----|---|-------|-------|-------|-------|-------|-------|-------|----------|
|                                                  | PREDICT<br>ED:                                                              |        |        |      |    |    |   |       |       |       |       |       |       |       |          |
| cds.Camellia_sinensis.comp2666_9_c0_seq1_m.26830 | ubiquitin carboxyl-terminal hydrolase 12 isoform X2 [Jatropha curcas]       | 50.13  | 21.586 | 24.6 | 11 | 12 | 9 | 1.005 | 1.078 | 1.027 | 0.997 | 0.985 | 0.911 | 0.93  | 1.07E-01 |
|                                                  | PREDICT<br>ED:                                                              |        |        |      |    |    |   |       |       |       |       |       |       |       |          |
| cds.Camellia_sinensis.comp2666_9_c0_seq2_m.41168 | ubiquitin carboxyl-terminal hydrolase 12 isoform X2 [Vitis vinifera]        | 34.753 | 3.3538 | 13.6 | 4  | 5  | 2 |       |       |       |       |       |       |       |          |
|                                                  | PREDICT<br>ED:                                                              |        |        |      |    |    |   |       |       |       |       |       |       |       |          |
| cds.Camellia_sinensis.comp2666_9_c0_seq3_m.54299 | ubiquitin carboxyl-terminal hydrolase 12 [Beta vulgaris subsp. vulgaris]    | 13.355 | 1.9094 | 23.2 | 3  | 4  | 1 | 0.946 | 1.048 | 0.947 | 1.114 | 0.981 | 0.986 | 1.048 | 4.40E-01 |
|                                                  | PREDICT<br>ED:                                                              |        |        |      |    |    |   |       |       |       |       |       |       |       |          |
| cds.Camellia_sinensis.comp2667_5_c0_seq1_m.28276 | translation initiation factor eIF-2B subunit alpha-like [Nicotiana tabacum] | 44.337 | 18.744 | 18.5 | 6  | 7  | 6 | 0.897 | 0.935 | 0.969 | 1.139 | 1.036 | 1.064 | 1.156 | 1.57E-02 |





|                                                  |                                                                                                                                   |        |        |      |   |    |   |       |       |       |       |       |       |       |          |
|--------------------------------------------------|-----------------------------------------------------------------------------------------------------------------------------------|--------|--------|------|---|----|---|-------|-------|-------|-------|-------|-------|-------|----------|
| cds.Camellia_sinensis.comp2669_2_c0_seq1_m.29062 | PREDICTED: ACT domain-containing protein ACR11-like [Daucus carota subsp. sativus]                                                | 31.506 | 97.028 | 31.3 | 9 | 32 | 9 | 1.009 | 0.994 | 0.985 | 1.01  | 1.016 | 0.982 | 1.007 | 6.28E-01 |
| cds.Camellia_sinensis.comp2670_1_c0_seq2_m.39566 | PREDICTED: universal stress protein PHOS34 [Eucalyptus grandis] esterase/lipase/thioesterase family protein [Populus trichocarpa] | 18.265 | 28.105 | 14.1 | 2 | 4  | 2 | 1.005 | 1.048 | 1.083 | 0.943 | 0.975 | 1.021 | 0.937 | 1.09E-01 |
| cds.Camellia_sinensis.comp2670_6_c0_seq1_m.26738 | PREDICTED: pre-mRNA-processing factor 8A [Theobroma cacao]                                                                        | 44.093 | 4.2696 | 5.3  | 2 | 2  | 2 | 1.039 | 0.978 | 1.006 | 1.027 | 0.985 | 0.971 | 0.987 | 6.13E-01 |
| cds.Camellia_sinensis.comp2670_7_c0_seq1_m.474   | PREDICTED: pre-mRNA-processing factor 8A [Theobroma cacao]                                                                        | 268.39 | 25.359 | 3.9  | 9 | 10 | 9 | 1.162 | 1.193 | 1.139 | 0.882 | 0.833 | 0.843 | 0.732 | 1.42E-04 |

|                                                  |                                                                                              |        |        |      |   |    |   |       |       |       |       |       |       |       |          |
|--------------------------------------------------|----------------------------------------------------------------------------------------------|--------|--------|------|---|----|---|-------|-------|-------|-------|-------|-------|-------|----------|
| cds.Camellia_sinensis.comp2670_9_c0_seq1_m.43631 | PREDICTED: non-specific lipid-transfer protein 1-like [Pyrus x bretschneideri]               | 12.235 | 1.3564 | 7.6  | 1 | 1  | 1 | 0.946 | 1.007 | 1.001 | 1.043 | 0.999 | 1.023 | 1.038 | 1.89E-01 |
| cds.Camellia_sinensis.comp2670_9_c0_seq2_m.48095 | PREDICTED: non-specific lipid-transfer protein 1-like [Pyrus x bretschneideri]               | 12.209 | 6.9332 | 28.8 | 3 | 6  | 3 | 0.824 | 0.811 | 0.787 | 1.247 | 1.173 | 1.205 | 1.497 | 5.73E-05 |
| cds.Camellia_sinensis.comp2671_2_c0_seq1_m.45153 | PREDICTED: NHP2-like protein 1 [Prunus mume]                                                 | 16.063 | 30.39  | 26.5 | 3 | 6  | 3 | 0.973 | 0.994 | 0.982 | 0.996 | 1.028 | 1.053 | 1.043 | 7.05E-02 |
| cds.Camellia_sinensis.comp2671_3_c0_seq1_m.41573 | PREDICTED: probable NAD(P)H dehydrogenase (quinone) FQR1-like 1 [Vigna radiata var. radiata] | 21.664 | 47.978 | 46.3 | 8 | 17 | 3 | 1.053 | 1.024 | 1.047 | 0.912 | 0.988 | 1.067 | 0.95  | 3.10E-01 |

|                                |                                                                                                       |        |        |      |   |   |   |       |       |       |       |       |       |       |          |
|--------------------------------|-------------------------------------------------------------------------------------------------------|--------|--------|------|---|---|---|-------|-------|-------|-------|-------|-------|-------|----------|
| cds.Camellia_sinensis.comp2671 | PREDICT<br>ED:<br>peptidyl-tRNA<br>hydrolase 2,<br>mitochondrial<br>isoform X2<br>[Ipomoea<br>PREDICT | 19.996 | 1.4244 | 9.4  | 2 | 2 | 2 | 1.034 | 1.046 | 1.006 | 1.071 | 0.901 | 0.946 | 0.946 | 3.29E-01 |
| cds.Camellia_sinensis.comp2672 | ED:<br>probable<br>fructokinase-7<br>[Prunus<br>mume]<br>PREDICT                                      | 41.129 | 7.6147 | 13.2 | 5 | 8 | 4 | 0.874 | 1.088 | 1.05  |       | 0.856 | 1.05  | 0.949 | 6.80E-01 |
| cds.Camellia_sinensis.comp2672 | ED: 11-<br>oxo-beta-<br>amyrin 30-<br>oxidase<br>isoform X2 [Vitis<br>vinifera]<br>PREDICT            | 60.915 | 5.9051 | 3.5  | 2 | 2 | 2 | 0.931 | 0.957 | 0.922 | 1.053 | 1.067 | 1.1   | 1.146 | 1.34E-03 |
| cds.Camellia_sinensis.comp2672 | ED: beta-<br>amyrin<br>synthase<br>[Sesamum<br>indicum]                                               | 87.518 | 16.013 | 5.9  | 4 | 4 | 4 | 0.92  | 0.931 | 1.032 | 1.046 | 1.061 | 1.089 | 1.109 | 5.30E-02 |

|                                |                   |                                                                                       |        |        |      |   |    |   |       |       |       |       |       |       |       |          |
|--------------------------------|-------------------|---------------------------------------------------------------------------------------|--------|--------|------|---|----|---|-------|-------|-------|-------|-------|-------|-------|----------|
| cds.Camellia_sinensis.comp2673 | 2_c0_seq1_m.22473 | PREDICT ED: tetratricopeptide repeat protein 38-like isoform X3 [Gossypium raimondii] | 53.338 | 1.649  | 4.9  | 2 | 2  | 2 | 0.981 | 1.013 | 0.853 | 1.051 | 1.071 | 1.051 | 1.115 | 1.72E-01 |
| cds.Camellia_sinensis.comp2674 | 4_c0_seq1_m.29380 | PREDICT ED: thioredoxin reductase 1-like [Nelumbo]                                    | 36.433 | 108.08 | 26.5 | 7 | 14 | 7 | 0.99  | 0.935 | 0.981 | 1.028 | 1.026 | 1.033 | 1.062 | 7.65E-02 |
| cds.Camellia_sinensis.comp2674 | 7_c0_seq1_m.38478 | PREDICT ED: arogenate dehydrogenase 1, chloroplastic isoform X1 [Vitis vinifera]      | 31.278 | 41.475 | 16.7 | 5 | 6  | 5 | 0.818 | 0.848 | 0.827 | 1.224 | 1.13  | 1.184 | 1.419 | 1.62E-04 |
| cds.Camellia_sinensis.comp2674 | 9_c0_seq1_m.45343 | PREDICT ED: myosin-5-like [Glycine max]                                               | 15.088 | 12.69  | 27.3 | 4 | 19 | 4 | 1.081 | 1.059 | 1.057 | 0.889 | 0.919 | 0.95  | 0.863 | 1.94E-03 |



|                                                  |                                                                               |        |        |      |   |    |   |       |       |       |       |       |       |       |          |
|--------------------------------------------------|-------------------------------------------------------------------------------|--------|--------|------|---|----|---|-------|-------|-------|-------|-------|-------|-------|----------|
| cds.Camellia_sinensis.comp2678_1_c0_seq1_m.31960 | PREDICT<br>ED:<br>methionine aminopeptidase 1B, chloroplastic [Juglans regia] | 40.922 | 24.306 | 15.2 | 7 | 10 | 7 | 1.058 | 1.119 | 1.097 | 0.932 | 0.892 | 0.914 | 0.836 | 9.99E-04 |
| cds.Camellia_sinensis.comp2678_3_c0_seq1_m.33779 | PREDICT<br>ED:<br>translin-associated protein X [Nelumbo nucifera]            | 32.049 | 1.8397 | 3.2  | 1 | 1  | 1 | 0.991 | 0.865 | 1.019 | 1.046 | 1.043 | 1.058 | 1.095 | 2.09E-01 |
| cds.Camellia_sinensis.comp2678_5_c0_seq1_m.34625 | NAD-dependent epimerase/dehydratase family protein [Medicago truncatula]      | 31.725 | 104.5  | 24.3 | 6 | 15 | 6 | 0.957 | 0.895 | 0.906 | 1.076 | 1.089 | 1.099 | 1.183 | 1.42E-03 |
| cds.Camellia_sinensis.comp2678_9_c0_seq2_m.42230 | PREDICT<br>ED:<br>universal stress protein A-like protein [Vitis vinifera]    | 17.846 | 9.5695 | 19.9 | 3 | 5  | 3 | 0.978 | 0.97  | 0.926 | 1.079 | 1.031 | 1.107 | 1.119 | 1.38E-02 |

|                       |                                                  |        |        |      |    |    |    |       |       |       |       |       |       |       |          |
|-----------------------|--------------------------------------------------|--------|--------|------|----|----|----|-------|-------|-------|-------|-------|-------|-------|----------|
| cds.Camellia_sinensis | THYLAKOID 1C, chloroplastic [Eucalyptus grandis] | 16.607 | 61.411 | 18.4 | 3  | 8  | 3  | 0.948 | 0.971 | 0.907 | 1.093 | 1.026 | 1.012 | 1.108 | 2.99E-02 |
| cds.Camellia_sinensis | thioredoxin [Vitis vinifera]                     | 22.95  | 75.526 | 25.2 | 5  | 21 | 4  | 1.013 | 1.057 | 1.006 | 0.974 | 0.951 | 0.969 | 0.941 | 2.36E-02 |
| cds.Camellia_sinensis | ascorbate ferrireductase 1 [Sesamum indicum]     | 25.265 | 34.592 | 4.8  | 1  | 4  | 1  | 0.834 | 0.748 | 0.738 | 1.216 | 1.26  | 1.272 | 1.616 | 3.02E-04 |
| cds.Camellia_sinensis | peroxidase 3-like [Nelumbo nucifera]             | 35.276 | 83.046 | 36.5 | 11 | 19 | 11 | 1     | 1.012 | 1.014 | 0.979 | 0.997 | 0.995 | 0.982 | 6.38E-02 |
| cds.Camellia_sinensis | protein 21, chloroplastic-like [Juglans regia]   | 19.349 | 30.634 | 25.1 | 3  | 4  | 3  | 1.007 | 1.019 | 0.982 | 1.006 | 0.974 | 0.884 | 0.952 | 2.79E-01 |





|                                                  |                                                                                        |        |        |      |   |    |   |       |       |       |       |       |       |       |          |
|--------------------------------------------------|----------------------------------------------------------------------------------------|--------|--------|------|---|----|---|-------|-------|-------|-------|-------|-------|-------|----------|
| cds.Camellia_sinensis.comp2683_9_c0_seq3_m.11391 | FG-GAP repeat-containing family protein [Populus trichocarpa]                          | 74.282 | 6.56   | 4    | 3 | 3  | 3 | 1.015 | 1.001 | 1.019 | 0.923 | 1.051 | 0.993 | 0.978 | 5.91E-01 |
| cds.Camellia_sinensis.comp2685_0_c0_seq1_m.10545 | PREDICT ED: SUMO-activating enzyme subunit 2 [Prunus mume]                             | 72.285 | 49.95  | 11   | 7 | 8  | 7 | 0.941 | 0.958 | 0.947 | 1.08  | 1.067 | 1.035 | 1.118 | 1.24E-03 |
| cds.Camellia_sinensis.comp2685_4_c0_seq2_m.50755 | PREDICT ED: NAD-dependent malic enzyme 59 kDa isoform, mitochondrial [Sesamum indicum] | 11.659 | 5.1399 | 19.5 | 3 | 5  | 2 | 0.987 | 0.922 | 1.014 | 1.015 | 1.037 | 1.042 | 1.059 | 1.22E-01 |
| cds.Camellia_sinensis.comp2686_5_c0_seq1_m.29633 | PREDICT ED: ycf54-like protein [Nicotiana tabacum]                                     | 25.386 | 107.35 | 49.6 | 9 | 21 | 9 | 1.092 | 1.031 | 1.058 | 0.939 | 0.901 | 0.926 | 0.87  | 2.46E-03 |

|                                                  |                                                                                                |        |        |      |    |    |    |       |       |       |       |       |       |       |          |
|--------------------------------------------------|------------------------------------------------------------------------------------------------|--------|--------|------|----|----|----|-------|-------|-------|-------|-------|-------|-------|----------|
| cds.Camellia_sinensis.comp2686_6_c0_seq1_m.30905 | PREDICTED:<br>soluble inorganic pyrophosphatase 6, chloroplastic-like<br>[Nicotiana attenuata] | 33.053 | 157.73 | 38.2 | 11 | 33 | 11 | 1.031 | 1.03  | 1.034 | 0.963 | 0.966 | 0.977 | 0.939 | 1.58E-04 |
| cds.Camellia_sinensis.comp2686_7_c0_seq1_m.23170 | PREDICTED:<br>fructose-1,6-bisphosphatase, chloroplastic<br>[Glycine max]                      | 45.155 | 247.91 | 39.1 | 16 | 42 | 16 | 1.005 | 0.945 | 0.946 | 1.022 | 1.058 | 1.02  | 1.07  | 4.41E-02 |
| cds.Camellia_sinensis.comp2687_4_c0_seq2_m.34359 | PREDICTED:<br>binding partner of ACD11 1-like<br>[Nicotiana tabacum]                           | 27.172 | 48.964 | 31.6 | 8  | 15 | 5  | 0.93  | 1.005 | 0.988 | 1.021 | 1.023 | 1.073 | 1.066 | 8.69E-02 |
| cds.Camellia_sinensis.comp2687_4_c0_seq3_m.40819 | PREDICTED:<br>binding partner of ACD11 1<br>[Vitis vinifera]                                   | 23.873 | 44.805 | 30.2 | 6  | 8  | 5  | 0.983 | 1.028 | 1.002 | 1.033 | 0.996 | 1.011 | 1.009 | 6.20E-01 |

|                                                  |                                                      |        |        |      |   |    |   |       |       |       |       |       |       |       |          |
|--------------------------------------------------|------------------------------------------------------|--------|--------|------|---|----|---|-------|-------|-------|-------|-------|-------|-------|----------|
|                                                  | PREDICT                                              |        |        |      |   |    |   |       |       |       |       |       |       |       |          |
| cds.Camellia_sinensis.comp2688_7_c0_seq1_m.34748 | ED: neurofilament heavy polypeptide [Vitis vinifera] | 29.224 | 40.323 | 27.8 | 6 | 9  | 6 | 1.203 | 1.22  | 1.195 | 0.795 | 0.754 | 0.794 | 0.648 | 1.97E-05 |
|                                                  | PREDICT                                              |        |        |      |   |    |   |       |       |       |       |       |       |       |          |
| cds.Camellia_sinensis.comp2688_8_c0_seq1_m.47435 | ED: endochitinase EP3 [Daucus carota subsp. sativus] | 16.327 | 13.09  | 19.5 | 5 | 8  | 5 | 0.952 | 0.951 | 0.944 | 1.063 | 1.07  | 1.028 | 1.11  | 1.18E-03 |
|                                                  | PREDICT                                              |        |        |      |   |    |   |       |       |       |       |       |       |       |          |
| cds.Camellia_sinensis.comp2689_2_c0_seq1_m.37174 | ED: ras-related protein RAB1b [Ricinus communis]     | 23.346 | 21.749 | 30.8 | 5 | 9  | 3 | 1.003 | 0.939 | 1.067 | 0.981 | 1.033 | 1.036 | 1.014 | 7.40E-01 |
|                                                  | PREDICT                                              |        |        |      |   |    |   |       |       |       |       |       |       |       |          |
| cds.Camellia_sinensis.comp2689_5_c0_seq1_m.15701 | ED: polyadenylate-binding protein 2-like [Jatropha   | 63.383 | 53.805 | 19.5 | 8 | 10 | 7 | 0.939 | 1.038 | 0.932 | 1.004 | 0.986 | 1.091 | 1.059 | 2.84E-01 |

|                                                  |                                                                                                                                                          |        |        |      |    |    |    |       |       |       |       |       |       |       |          |
|--------------------------------------------------|----------------------------------------------------------------------------------------------------------------------------------------------------------|--------|--------|------|----|----|----|-------|-------|-------|-------|-------|-------|-------|----------|
| cds.Camellia_sinensis.comp2690_0_c0_seq1_m.38174 | PREDICTED:<br>histidine-containing phosphotransfer protein 1-like isoform X1 [Erythranthe guttata] plasma membrane fusion protein [Arabidopsis thaliana] | 19.911 | 6.3023 | 13.2 | 2  | 3  | 2  | 0.8   | 1.147 | 0.835 | 1.126 | 1.017 | 1.118 | 1.172 | 2.22E-01 |
| cds.Camellia_sinensis.comp2690_7_c0_seq5_m.36751 | PREDICTED:<br>peroxisomal and mitochondrial division factor 2 [Daucus carota subsp. sativus]                                                             | 25.319 | 47.2   | 30.7 | 5  | 12 | 5  | 0.946 | 1.031 | 1.072 | 1.028 | 1.016 | 0.972 | 0.989 | 8.21E-01 |
| cds.Camellia_sinensis.comp2691_4_c0_seq1_m.26134 | PREDICTED:<br>cytochrome b-c1 complex subunit 7-2 isoform X1 [Vitis vinifera]                                                                            | 47.848 | 34.428 | 25.5 | 13 | 15 | 13 | 0.977 | 0.978 | 0.979 | 1.032 | 0.954 | 1.05  | 1.035 | 3.76E-01 |
| cds.Camellia_sinensis.comp2692_1_c1_seq1_m.42103 |                                                                                                                                                          | 14.728 | 26.058 | 42.3 | 4  | 12 | 4  | 0.96  | 0.989 | 0.956 | 1.008 | 1.024 | 1.013 | 1.048 | 1.55E-02 |

|                                                  |                                                                            |        |        |      |   |   |   |       |       |       |       |       |       |       |          |
|--------------------------------------------------|----------------------------------------------------------------------------|--------|--------|------|---|---|---|-------|-------|-------|-------|-------|-------|-------|----------|
|                                                  | PREDICT<br>ED:                                                             |        |        |      |   |   |   |       |       |       |       |       |       |       |          |
| cds.Camellia_sinensis.comp2692_3_c0_seq1_m.22885 | vacuolar protein sorting-associated protein 9A isoform X1 [Vitis vinifera] | 53.125 | 5.3548 | 3.8  | 1 | 1 | 1 | 0.929 | 1.107 | 0.833 | 1.094 | 1.067 | 0.997 | 1.101 | 3.07E-01 |
|                                                  | PREDICT<br>ED: 4-                                                          |        |        |      |   |   |   |       |       |       |       |       |       |       |          |
| cds.Camellia_sinensis.comp2692_7_c0_seq1_m.27964 | sulfomucopolactone hydrolase [Prunus mume]                                 | 36.974 | 5.0534 | 10.8 | 4 | 4 | 4 | 0.996 | 1.026 | 1.006 | 0.957 | 0.998 | 1.022 | 0.983 | 4.59E-01 |
|                                                  | PREDICT<br>ED:                                                             |        |        |      |   |   |   |       |       |       |       |       |       |       |          |
| cds.Camellia_sinensis.comp2693_5_c0_seq3_m.37978 | monothiol glutaredoxin-S7, chloroplastic [Populus euphratica]              | 19.607 | 16.85  | 25   | 3 | 6 | 3 | 0.975 | 0.978 | 1.036 | 1.032 | 0.969 | 1.006 | 1.006 | 8.33E-01 |
|                                                  | acetyltransferase (GNAT) domain protein [Medicago truncatula]              |        |        |      |   |   |   |       |       |       |       |       |       |       |          |
| cds.Camellia_sinensis.comp2695_0_c0_seq5_m.39635 | transmembrane protein [Arabidopsis thaliana]                               | 20.016 | 1.3934 | 4.6  | 1 | 1 | 1 | 1.08  | 1.105 | 1.056 | 0.985 | 0.887 | 0.874 | 0.847 | 1.38E-02 |
| cds.Camellia_sinensis.comp2695_7_c0_seq1_m.38574 |                                                                            | 23.198 | 4.0528 | 8.1  | 2 | 4 | 2 | 1.002 | 0.997 | 0.956 | 1.014 | 0.987 | 1.055 | 1.034 | 2.43E-01 |



|                                                     |                                                                                 |        |        |      |   |    |   |       |       |       |       |       |       |       |          |
|-----------------------------------------------------|---------------------------------------------------------------------------------|--------|--------|------|---|----|---|-------|-------|-------|-------|-------|-------|-------|----------|
| cds.Camellia_sinensis.comp2697_6_c0_seq1_m.27661    | PREDICT<br>ED:<br>translation initiation factor IF-3 [Ricinus communis]         | 31.233 | 28.789 | 13.9 | 3 | 6  | 3 | 1.234 | 1.202 | 1.17  | 0.792 | 0.79  | 0.772 | 0.653 | 1.82E-05 |
| cds.Camellia_sinensis.comp2698_0_c0_seq1_m.12038    | PREDICT<br>ED:<br>transmembrane 9 superfamily member 8-like [Solanum tuberosum] | 74.085 | 14.942 | 5.6  | 4 | 4  | 4 | 1.035 | 1.029 | 1.049 | 0.946 | 0.971 | 0.891 | 0.902 | 1.64E-02 |
| cds.Camellia_sinensis.comp2698_3_c0_seq1_2_m.3366_9 | PREDICT<br>ED: THO<br>complex subunit 4A-like [Juglans regia]                   | 28.209 | 15.891 | 24.8 | 8 | 13 | 1 | 1.134 | 1.08  | 1.206 | 0.834 | 0.851 | 0.859 | 0.744 | 8.78E-04 |
| cds.Camellia_sinensis.comp2698_3_c0_seq1_3_m.3364_7 | PREDICT<br>ED: THO<br>complex subunit 4A-like isoform X1 [Nelumbo nucifera]     | 28.224 | 4.6827 | 25   | 8 | 12 | 2 | 1.054 | 1.095 | 1.07  | 0.847 | 0.94  | 0.976 | 0.858 | 2.44E-02 |
| cds.Camellia_sinensis.comp2698_3_c0_seq1_5_m.3624_0 | PREDICT<br>ED: THO<br>complex subunit 4B-like [Juglans regia]                   | 28.281 | 2.4998 | 8    | 2 | 2  | 1 | 1.007 | 0.996 | 0.902 | 0.95  | 1.039 | 1.114 | 1.068 | 3.24E-01 |





|                       |                                                                    |        |        |      |    |    |    |       |       |       |       |       |       |       |          |
|-----------------------|--------------------------------------------------------------------|--------|--------|------|----|----|----|-------|-------|-------|-------|-------|-------|-------|----------|
| PREDICT               |                                                                    |        |        |      |    |    |    |       |       |       |       |       |       |       |          |
| cds.Camellia_sinensis | ED: putative beta-D-xylosidase [Jatropha curcas]                   | 83.377 | 148.26 | 26.1 | 16 | 42 | 16 | 0.922 | 0.934 | 0.918 | 1.074 | 1.051 | 1.093 | 1.16  | 2.83E-04 |
| cds.Camellia_sinensis |                                                                    | 26.014 | 26.705 | 14   | 3  | 6  | 3  | 1.129 | 1.104 | 1.004 | 0.881 | 0.879 | 0.91  | 0.825 | 7.08E-03 |
| cds.Camellia_sinensis | uncharacterized LOC100271_c0_seq1 4051 [Zea mays]                  | 21.662 | 11.98  | 19.6 | 3  | 6  | 3  | 0.925 | 0.999 | 0.96  | 0.956 | 1.115 | 1.066 | 1.088 | 1.80E-01 |
| PREDICT               |                                                                    |        |        |      |    |    |    |       |       |       |       |       |       |       |          |
| cds.Camellia_sinensis | ED: B-cell receptor-associated protein 31-like [Nicotiana tabacum] | 24.807 | 35.457 | 14.4 | 3  | 9  | 3  | 1.005 | 1.004 | 0.99  | 1.004 | 0.969 | 1.023 | 0.999 | 9.45E-01 |
| PREDICT               |                                                                    |        |        |      |    |    |    |       |       |       |       |       |       |       |          |
| cds.Camellia_sinensis | ED: dihydrofolate reductase [Vitis vinifera]                       | 32.39  | 61.654 | 9.1  | 2  | 3  | 2  | 1.401 | 1.392 | 1.43  | 0.561 | 0.682 | 0.507 | 0.414 | 9.54E-03 |



|                                                  |                                                                                                             |        |        |      |    |    |    |       |       |       |       |       |       |       |          |
|--------------------------------------------------|-------------------------------------------------------------------------------------------------------------|--------|--------|------|----|----|----|-------|-------|-------|-------|-------|-------|-------|----------|
| cds.Camellia_sinensis.comp2704_9_c0_seq1_m.21867 | PREDICT<br>ED:<br>protein disulfide-isomerase 5-2 [Ricinus communis]                                        | 48.982 | 32.986 | 24.1 | 11 | 14 | 11 | 0.946 | 0.949 | 0.976 | 1.035 | 1.074 | 1.056 | 1.102 | 2.60E-03 |
| cds.Camellia_sinensis.comp2705_1_c0_seq1_m.17273 | PREDICT<br>ED:<br>anthranilate synthase alpha subunit 2, chloroplast ic-like isoform X2 [Nicotiana tabacum] | 65.075 | 190.48 | 45.6 | 23 | 48 | 23 | 1.013 | 1.013 | 1     | 0.982 | 0.984 | 0.988 | 0.976 | 6.70E-03 |
| cds.Camellia_sinensis.comp2705_5_c0_seq1_m.10230 | PREDICT<br>ED:<br>coronatine insensitive protein 1 [Theobroma cacao]                                        | 66.812 | 12.836 | 11.3 | 6  | 7  | 6  | 0.87  | 0.958 | 1.015 | 1.02  | 1.042 | 1.084 | 1.107 | 1.00E-01 |
| cds.Camellia_sinensis.comp2705_8_c0_seq2_m.48495 | PREDICT<br>ED: LOW QUALITY PROTEIN:<br>auxilin-related protein 1-like [Malus domestica]                     | 12.134 | 1.7325 | 9.5  | 1  | 3  | 1  | 1.021 | 0.923 | 0.953 | 1.014 | 1.1   | 1.044 | 1.09  | 8.56E-02 |



|                                |                   |                                                                                   |        |        |      |    |    |    |       |       |       |       |       |       |       |          |
|--------------------------------|-------------------|-----------------------------------------------------------------------------------|--------|--------|------|----|----|----|-------|-------|-------|-------|-------|-------|-------|----------|
| cds.Camellia_sinensis.comp2708 | 7_c0_seq1_m.46535 | PREDICTED:<br>UPF0664 stress-induced protein C29B12.11c<br>[Nelumbo nucifera]     | 23.128 | 1.9467 | 12.3 | 2  | 2  | 2  | 0.87  | 0.884 | 0.917 | 1.307 | 1.02  | 1.061 | 1.268 | 4.17E-02 |
| cds.Camellia_sinensis.comp2708 | 8_c0_seq1_m.12753 | PREDICTED:<br>probable Xaa-Pro aminopeptidase P isoform X1<br>[Jatropha curcas]   | 72.33  | 43.018 | 18.3 | 10 | 15 | 10 | 0.97  | 1.005 | 0.992 | 1.009 | 1.012 | 1.008 | 1.021 | 1.84E-01 |
| cds.Camellia_sinensis.comp2709 | 3_c0_seq2_m.50004 | PREDICTED: non-specific lipid transfer protein GPI-anchored 2<br>[Vitis vinifera] | 12.438 | 2.2611 | 15   | 1  | 1  | 1  |       |       |       |       |       |       |       |          |
| cds.Camellia_sinensis.comp2710 | 2_c0_seq1_m.14624 | PREDICTED: T-complex protein 1 subunit epsilon<br>[Nicotiana tabacum]             | 59.216 | 55.034 | 27.1 | 15 | 23 | 15 | 0.933 | 0.937 | 0.926 | 1.065 | 1.072 | 1.054 | 1.141 | 2.27E-05 |







|                                                 |                                                                                              |        |        |      |    |    |    |       |       |       |       |       |       |       |          |
|-------------------------------------------------|----------------------------------------------------------------------------------------------|--------|--------|------|----|----|----|-------|-------|-------|-------|-------|-------|-------|----------|
| cds.Camellia_sinensis.comp27127_c0_seq1_m.44386 | PREDICTED: 3-ketoacyl-CoA synthase 11 isoform X2 [Gossypium raimondii]                       | 24.21  | 1.1574 | 3.8  | 1  | 1  | 1  |       |       |       |       |       |       |       |          |
| cds.Camellia_sinensis.comp27140_c0_seq1_m.23629 | PREDICTED: anthocyanidin 3-O-glucosyltransferase 7 [Vitis vinifera]                          | 50.677 | 82.478 | 25   | 10 | 18 | 10 | 1.134 | 1.114 | 1.12  | 0.837 | 0.859 | 0.885 | 0.766 | 9.79E-05 |
| cds.Camellia_sinensis.comp27153_c0_seq1_m.21972 | PREDICTED: structural maintenance of chromosome protein 2-1-like [Ziziphus jujuba]           | 42.454 | 40.153 | 22   | 7  | 10 | 2  | 1.04  | 1.067 | 1.099 | 0.912 | 0.946 | 0.926 | 0.868 | 1.82E-03 |
| cds.Camellia_sinensis.comp27154_c0_seq1_m.24675 | PREDICTED: probable xyloglucan endotransglucosylase/hydrolase protein B [Populus euphratica] | 35.618 | 2.2642 | 10.4 | 3  | 3  | 2  | 0.917 | 1.087 | 0.855 | 1.051 | 1.023 | 1.091 | 1.107 | 2.22E-01 |

|                                |                                                                             |        |        |      |    |    |   |       |       |       |       |       |       |       |          |
|--------------------------------|-----------------------------------------------------------------------------|--------|--------|------|----|----|---|-------|-------|-------|-------|-------|-------|-------|----------|
| cds.Camellia_sinensis.comp2715 | PREDICT ED: putative GEM-like protein 3 [Erythraea guttata]                 | 46.435 | 1.5661 | 2.1  | 1  | 1  | 1 | 1.059 | 1.019 | 1.02  | 0.933 | 1.003 | 0.96  | 0.935 | 5.10E-02 |
| cds.Camellia_sinensis.comp2716 | PREDICT ED: hypersensitive-induced response protein 2 [Solanum tuberosum]   | 31.467 | 86.661 | 43.7 | 12 | 33 | 9 | 0.927 | 0.915 | 0.898 | 1.104 | 1.091 | 1.084 | 1.197 | 7.64E-05 |
| cds.Camellia_sinensis.comp2716 | PREDICT ED: U5 small nuclear ribonucleoprotein 40 kDa [Ziziphus jujuba]     | 39.294 | 13.206 | 12.1 | 4  | 4  | 4 | 1.016 | 1.005 | 1.01  | 0.994 | 1.01  | 1.02  | 0.998 | 7.87E-01 |
| cds.Camellia_sinensis.comp2716 | PREDICT ED: SUMO-activating enzyme subunit 1B-1 isoform X1 [Vitis vinifera] | 36.092 | 19.113 | 24.8 | 7  | 11 | 7 | 0.972 | 0.944 | 0.962 | 1.016 | 1.058 | 1.073 | 1.093 | 8.46E-03 |







|                                                  |                                                                                                          |        |        |      |   |   |   |       |       |       |       |       |       |       |          |
|--------------------------------------------------|----------------------------------------------------------------------------------------------------------|--------|--------|------|---|---|---|-------|-------|-------|-------|-------|-------|-------|----------|
| cds.Camellia_sinensis.comp2721_4_c0_seq5_m.34668 | PREDICTED:<br>peptidyl-prolyl cis-trans isomerase FKBP16-1,<br>chloroplastic isoform X2 [Vitis vinifera] | 15.426 | 6.9752 | 17.3 | 1 | 1 | 1 | 1.002 | 0.899 | 1.018 | 1.085 | 1.08  | 0.939 | 1.063 | 3.79E-01 |
| cds.Camellia_sinensis.comp2721_5_c0_seq1_m.14883 | PREDICTED:<br>heterogeneous nuclear ribonucleoprotein Q [Sesamum indicum]                                | 53.327 | 3.4461 | 2.3  | 1 | 1 | 1 | 1.103 | 1.038 | 1.079 | 1.033 | 0.791 | 0.943 | 0.859 | 1.22E-01 |
| cds.Camellia_sinensis.comp2721_6_c0_seq1_m.30162 | PREDICTED:<br>early nodulin-like protein 2 [Ipomoea nil]                                                 | 35.952 | 4.6579 | 9.5  | 3 | 3 | 3 |       |       |       |       |       |       |       |          |
| cds.Camellia_sinensis.comp2722_4_c0_seq2_m.34734 | PREDICTED:<br>macrodomain-containing protein VPA0103-like isoform X3 [Nicotiana tabacum]                 | 30.955 | 84.034 | 29.5 | 6 | 9 | 6 | 1.028 | 1.019 | 1.018 | 0.956 | 1.085 | 0.926 | 0.968 | 5.47E-01 |



|                                                 |                                                                                                     |        |        |      |   |   |   |       |       |       |       |       |       |       |          |
|-------------------------------------------------|-----------------------------------------------------------------------------------------------------|--------|--------|------|---|---|---|-------|-------|-------|-------|-------|-------|-------|----------|
| cds.Camellia_sinensis.comp27229_c0_seq1_m.34263 | PREDICTED:<br>NADH dehydrogenase [ubiquinone] 1 alpha subcomplex subunit 8-B-like [Sesamum indicum] | 12.075 | 1.42   | 15   | 2 | 3 | 1 | 0.988 | 0.898 | 1.032 | 1.085 | 1.033 | 0.987 | 1.064 | 2.70E-01 |
| cds.Camellia_sinensis.comp27229_c0_seq5_m.51936 | PREDICTED:<br>NADH dehydrogenase [ubiquinone] 1 alpha subcomplex subunit 8-B-like [Ipomoea nil]     | 11.971 | 3.7679 | 28.3 | 4 | 5 | 3 | 1.111 | 1.049 | 1.091 | 0.918 | 0.853 | 0.955 | 0.839 | 8.92E-03 |
| cds.Camellia_sinensis.comp27241_c0_seq1_m.23938 | PREDICTED:<br>IAA-amino acid hydrolase ILR1-like 3 [Vitis vinifera]                                 | 48.017 | 8.8507 | 6.7  | 3 | 3 | 2 | 0.99  | 0.914 | 1.051 | 1.037 | 0.962 | 1.061 | 1.036 | 5.16E-01 |
| cds.Camellia_sinensis.comp27255_c0_seq1_m.26215 | PREDICTED:<br>GEM-like protein 1 [Theobroma cacao]                                                  | 37.906 | 21.443 | 8    | 3 | 4 | 3 | 0.974 | 1.024 | 0.969 | 1.017 | 0.996 | 1.005 | 1.017 | 4.05E-01 |



|                                                 |                                                                                                                                            |        |        |      |    |    |    |       |       |       |       |       |       |       |          |  |
|-------------------------------------------------|--------------------------------------------------------------------------------------------------------------------------------------------|--------|--------|------|----|----|----|-------|-------|-------|-------|-------|-------|-------|----------|--|
| cds.Camellia_sinensis.comp27256_c0_seq1_m.18069 | PREDICT<br>ED: triose phosphate/phosphate translocator, non-green plastid, chloroplastic-like [Nicotiana attenuata]                        | 53.315 | 6.5504 | 5.6  | 2  | 3  | 2  |       |       |       |       |       |       |       |          |  |
| cds.Camellia_sinensis.comp27260_c0_seq2_m.11556 | PREDICT<br>ED: protein MODIFIER OF SNC1 11 isoform X1 [Vitis vinifera]                                                                     | 22.318 | 45.149 | 41.2 | 6  | 10 | 6  | 1.021 | 1.05  | 0.99  | 1     | 0.975 | 1     | 0.972 | 2.10E-01 |  |
| cds.Camellia_sinensis.comp27260_c0_seq3_m.14275 | PREDICT<br>ED: dihydrolipoyllysine-residue acetyltransferase component 5 of pyruvate dehydrogenase complex, chloroplastic [Vitis vinifera] | 49.889 | 51.545 | 28.3 | 11 | 15 | 10 | 0.998 | 1.017 | 0.979 | 1.014 | 1.011 | 0.979 | 1.003 | 8.43E-01 |  |

|                                                 |                                                                                      |        |        |      |   |    |   |       |       |       |       |       |       |       |          |
|-------------------------------------------------|--------------------------------------------------------------------------------------|--------|--------|------|---|----|---|-------|-------|-------|-------|-------|-------|-------|----------|
| cds.Camellia_sinensis.comp27269_c0_seq1_m.35694 | PREDICTED:<br>thylakoid lumenal 16.5 kDa protein, chloroplastic<br>[Ziziphus jujuba] | 25.127 | 42.701 | 32.3 | 6 | 16 | 6 | 1.061 | 1.02  | 0.969 | 0.994 | 0.953 | 0.988 | 0.962 | 2.66E-01 |
| cds.Camellia_sinensis.comp27274_c0_seq1_m.37043 | PREDICTED:<br>RPM1-interacting protein 4-like<br>[Sesamum indicum]                   | 26.671 | 1.4361 | 5.3  | 1 | 1  | 1 | 1.154 | 0.967 | 1.008 | 0.97  | 0.952 | 0.934 | 0.913 | 1.79E-01 |
| cds.Camellia_sinensis.comp27275_c0_seq2_m.35346 | PREDICTED:<br>60S ribosomal protein L15<br>[Nicotiana tabacum]                       | 24.139 | 2.7825 | 6.9  | 2 | 3  | 2 | 1.041 | 1.087 | 1.091 | 0.959 | 0.923 | 0.9   | 0.864 | 3.60E-03 |
| cds.Camellia_sinensis.comp27280_c0_seq1_m.38417 | PREDICTED:<br>mitochondrial fission 1 protein A-like<br>[Nicotiana tabacum]          | 18.391 | 1.9523 | 9.4  | 2 | 2  | 2 | 1.044 | 1.018 | 1.06  | 0.955 | 0.966 | 0.954 | 0.921 | 2.72E-03 |
| cds.Camellia_sinensis.comp27284_c0_seq1_m.31468 | PREDICTED:<br>60S ribosomal protein L17-2<br>[Ziziphus jujuba]                       | 24.958 | 43.431 | 25.7 | 5 | 9  | 3 | 1.08  | 1.096 | 1.122 | 0.918 | 0.932 | 0.854 | 0.82  | 2.40E-03 |



|                                |           |          |                                                                                                        |        |        |      |    |    |    |       |       |       |       |       |       |       |          |
|--------------------------------|-----------|----------|--------------------------------------------------------------------------------------------------------|--------|--------|------|----|----|----|-------|-------|-------|-------|-------|-------|-------|----------|
| cds.Camellia_sinensis.comp2729 | 0_c0_seq4 | _m.33441 | PREDICTED:<br>peptidyl-prolyl cis-trans isomerase FKBP16-4,<br>chloroplast isoform X3 [Vitis vinifera] | 24.796 | 43.753 | 32.5 | 7  | 21 | 7  | 1.019 | 0.977 | 0.962 | 0.995 | 0.979 | 1.011 | 1.009 | 6.59E-01 |
| cds.Camellia_sinensis.comp2729 | 2_c0_seq1 | _m.33110 | PREDICTED: 14-3-3 protein 7 [Ricinus communis]                                                         | 28.896 | 141.62 | 60.5 | 17 | 48 | 14 | 0.977 | 0.949 | 0.905 | 1.04  | 1.063 | 1.086 | 1.126 | 9.52E-03 |
| cds.Camellia_sinensis.comp2730 | 0_c1_seq1 | _m.38184 | PREDICTED:<br>chlorophyll a-b binding protein CP29.1,<br>chloroplast [Ricinus communis]                | 24.283 | 115.72 | 46.2 | 10 | 50 | 7  | 1.036 | 0.955 | 0.969 | 0.982 | 1.034 | 1.008 | 1.022 | 4.96E-01 |
| cds.Camellia_sinensis.comp2730 | 0_c1_seq2 | _m.42952 | PREDICTED:<br>chlorophyll a-b binding protein CP29.1,<br>chloroplast [Ricinus communis]                | 30.03  | 74.473 | 34.8 | 8  | 26 | 5  | 1.063 | 1.05  | 1.013 | 0.965 | 0.936 | 0.985 | 0.923 | 1.82E-02 |

|                                                 |                                                                                               |        |        |      |    |    |    |       |       |       |       |       |       |       |          |
|-------------------------------------------------|-----------------------------------------------------------------------------------------------|--------|--------|------|----|----|----|-------|-------|-------|-------|-------|-------|-------|----------|
| cds.Camellia_sinensis.comp27314_c0_seq1_m.30117 | PREDICTED:<br>eukaryotic translation initiation factor 2 subunit alpha-like [Sesamum indicum] | 41.484 | 31.367 | 14.7 | 5  | 6  | 5  | 1.008 | 0.995 | 1.011 | 0.86  | 1.082 | 1.044 | 0.991 | 8.60E-01 |
| cds.Camellia_sinensis.comp27316_c0_seq1_m.17284 | PREDICTED:<br>extensin-like [Nicotiana tabacum]                                               | 63.117 | 16.687 | 11   | 6  | 7  | 6  | 1.016 | 1.018 | 0.957 | 0.97  | 0.939 | 1.028 | 0.982 | 6.08E-01 |
| cds.Camellia_sinensis.comp27319_c0_seq1_m.22934 | PREDICTED:<br>acetylornithine aminotransferase, mitochondrial-like [Jatropha curcas]          | 49.89  | 110.15 | 31.2 | 11 | 18 | 10 | 1.007 | 1.021 | 1.013 | 0.957 | 0.999 | 0.97  | 0.962 | 4.37E-02 |
| cds.Camellia_sinensis.comp27322_c0_seq1_m.25140 | PREDICTED:<br>patatin-like protein 2 isoform X2 [Arachis duranensis]                          | 49.106 | 1.5436 | 1.6  | 1  | 2  | 1  | 0.93  | 0.977 | 0.966 | 1.026 | 1.039 | 1.086 | 1.097 | 1.55E-02 |

|                                                  |                                                                     |        |        |      |   |    |   |       |       |       |       |       |       |       |          |
|--------------------------------------------------|---------------------------------------------------------------------|--------|--------|------|---|----|---|-------|-------|-------|-------|-------|-------|-------|----------|
| cds.Camellia_sinensis.comp2732_2_c0_seq2_m.31542 | Patatin group A-3 [Morus notabilis]                                 | 44.871 | 21.276 | 17.2 | 6 | 7  | 6 | 1.073 | 0.942 | 0.948 | 1.035 | 1.065 | 0.946 | 1.028 | 6.38E-01 |
|                                                  | PREDICT ED:                                                         |        |        |      |   |    |   |       |       |       |       |       |       |       |          |
| cds.Camellia_sinensis.comp2732_7_c0_seq1_m.25811 | poly(U)-specific endoribonuclease-B [Vitis vinifera]                | 51.393 | 4.3687 | 5.7  | 2 | 2  | 2 |       |       |       |       |       |       |       |          |
|                                                  | PREDICT ED:                                                         |        |        |      |   |    |   |       |       |       |       |       |       |       |          |
|                                                  | protein                                                             |        |        |      |   |    |   |       |       |       |       |       |       |       |          |
| cds.Camellia_sinensis.comp2733_0_c0_seq1_m.15051 | ASPARTIC PROTEASE IN GUARD CELL 1 [Ricinus communis]                | 47.863 | 11.358 | 10   | 4 | 6  | 4 | 1.101 | 1.086 | 1.071 | 0.925 | 0.942 | 0.94  | 0.862 | 1.15E-04 |
|                                                  | PREDICT ED: beta-glucosidase 13 [Vitis vinifera]                    |        |        |      |   |    |   |       |       |       |       |       |       |       |          |
| cds.Camellia_sinensis.comp2733_5_c0_seq1_m.32917 |                                                                     | 42.59  | 22.017 | 12.4 | 5 | 10 | 5 | 1.093 | 1.083 | 1.122 | 0.943 | 0.886 | 0.886 | 0.823 | 1.12E-03 |
|                                                  | PREDICT ED:                                                         |        |        |      |   |    |   |       |       |       |       |       |       |       |          |
| cds.Camellia_sinensis.comp2733_6_c0_seq2_m.51245 | ubiquitin carboxyl-terminal hydrolase 12-like [Nicotiana attenuata] | 20.875 | 25.691 | 33.3 | 8 | 8  | 3 | 0.989 | 1.039 | 0.942 | 0.992 | 0.994 | 1.056 | 1.024 | 5.25E-01 |

|                                                  |                                                                                    |        |        |      |   |    |   |       |       |       |       |       |       |       |          |
|--------------------------------------------------|------------------------------------------------------------------------------------|--------|--------|------|---|----|---|-------|-------|-------|-------|-------|-------|-------|----------|
|                                                  | PREDICT                                                                            |        |        |      |   |    |   |       |       |       |       |       |       |       |          |
|                                                  | ED:                                                                                |        |        |      |   |    |   |       |       |       |       |       |       |       |          |
| cds.Camellia_sinensis.comp2733_9_c0_seq2_m.35031 | chlorophyll a-b binding protein 13, chloroplast ic-like [Nelumbo nucifera]         | 28.901 | 23.494 | 26.1 | 5 | 48 | 3 | 0.947 | 0.941 | 0.969 | 1.045 | 1.047 | 1.02  | 1.089 | 2.22E-03 |
|                                                  | PREDICT                                                                            |        |        |      |   |    |   |       |       |       |       |       |       |       |          |
|                                                  | ED:                                                                                |        |        |      |   |    |   |       |       |       |       |       |       |       |          |
| cds.Camellia_sinensis.comp2733_9_c0_seq4_m.43220 | chlorophyll a-b binding protein 5, chloroplast ic [Sesamum indicum]                | 20.154 | 58.365 | 44.4 | 6 | 59 | 2 | 1.021 | 0.927 | 1.019 | 0.964 | 1.051 | 0.98  | 1.009 | 8.27E-01 |
|                                                  | PREDICT                                                                            |        |        |      |   |    |   |       |       |       |       |       |       |       |          |
|                                                  | ED:                                                                                |        |        |      |   |    |   |       |       |       |       |       |       |       |          |
| cds.Camellia_sinensis.comp2733_9_c0_seq6_m.50345 | chlorophyll a-b binding protein of LHCII type 1 [Musa acuminata subsp. malaccensi] | 11.014 | 1.5478 | 75   | 3 | 7  | 1 | 0.922 | 1.005 | 1.007 | 1.095 | 0.999 | 1     | 1.055 | 2.76E-01 |
|                                                  | PREDICT                                                                            |        |        |      |   |    |   |       |       |       |       |       |       |       |          |
|                                                  | ED:                                                                                |        |        |      |   |    |   |       |       |       |       |       |       |       |          |
| cds.Camellia_sinensis.comp2734_1_c0_seq3_m.47505 | autophagy-related protein 8C [Sesamum indicum]                                     | 13.707 | 2.3951 | 19.3 | 3 | 3  | 3 | 0.965 | 0.962 | 0.942 | 1.055 | 1.022 | 1.076 | 1.099 | 4.96E-03 |

|                                                  |                                                                                             |        |        |      |    |    |   |       |       |       |       |       |       |       |          |
|--------------------------------------------------|---------------------------------------------------------------------------------------------|--------|--------|------|----|----|---|-------|-------|-------|-------|-------|-------|-------|----------|
| cds.Camellia_sinensis.comp2735_0_c0_seq1_m.24260 | PREDICT<br>ED:<br>chalcone synthase 1 [Juglans regia]                                       | 48.966 | 67.923 | 32.2 | 11 | 35 | 2 | 1.518 | 1.391 | 1.424 | 0.472 | 0.54  | 0.506 | 0.35  | 2.17E-05 |
| cds.Camellia_sinensis.comp2735_0_c0_seq2_m.26012 | PREDICT<br>ED:<br>chalcone synthase 1 [Juglans regia]                                       | 49.033 | -2     | 30.6 | 10 | 33 | 1 |       |       |       |       |       |       |       |          |
| cds.Camellia_sinensis.comp2735_4_c0_seq3_m.28181 | PREDICT<br>ED:<br>geranylgeranyl pyrophosphate synthase, chloroplast-like [Sesamum indicum] | 40.703 | 5.1704 | 8.8  | 3  | 3  | 3 | 1.031 | 1.057 | 1.072 | 0.979 | 0.946 | 0.911 | 0.897 | 1.02E-02 |
| cds.Camellia_sinensis.comp2735_9_c0_seq1_m.43821 | PREDICT<br>ED:<br>delta(1)-pyrroline-2-carboxylate reductase [Prunus mume]                  | 21.424 | 49.743 | 28.1 | 5  | 10 | 5 | 0.939 | 0.953 | 0.983 | 1.059 | 1.069 | 1.042 | 1.103 | 3.16E-03 |



|                                                  |                                                                                                                 |        |        |      |   |    |   |       |       |       |       |       |       |       |          |
|--------------------------------------------------|-----------------------------------------------------------------------------------------------------------------|--------|--------|------|---|----|---|-------|-------|-------|-------|-------|-------|-------|----------|
| cds.Camellia_sinensis.comp2736_2_c0_seq1_m.50066 | PREDICTED:<br>pyrophosphate-energized vacuolar membrane proton pump 1-like isoform X1<br>[Nicotiana sylvestris] | 17.116 | 54.456 | 44.8 | 7 | 15 | 2 | 0.969 | 0.918 | 1.023 | 0.97  | 1.016 | 1.051 | 1.044 | 3.30E-01 |
| cds.Camellia_sinensis.comp2736_3_c0_seq2_m.28875 | PREDICTED:<br>protein FLX-like 4<br>[Jatropha curcas]                                                           | 34.278 | 12.847 | 22.5 | 7 | 10 | 7 | 0.958 | 0.987 | 0.986 | 1.015 | 1.034 | 1.013 | 1.045 | 2.04E-02 |
| cds.Camellia_sinensis.comp2736_7_c0_seq1_m.14464 | PREDICTED:<br>probable inorganic phosphate transporter 1-3<br>[Sesamum indicum]                                 | 59.078 | 28.096 | 11.1 | 6 | 9  | 5 | 1.007 | 0.983 | 0.99  | 0.962 | 1.015 | 1.005 | 1.001 | 9.81E-01 |

|                                                  |                                                                                                           |        |        |      |    |    |    |       |       |       |       |       |       |       |          |
|--------------------------------------------------|-----------------------------------------------------------------------------------------------------------|--------|--------|------|----|----|----|-------|-------|-------|-------|-------|-------|-------|----------|
| cds.Camellia_sinensis.comp2736_9_c0_seq2_m.41742 | PREDICTED:<br>NADH dehydrogenase [ubiquinone] iron-sulfur protein 4, mitochondrial-like [Sesamum indicum] | 19.867 | 8.1251 | 18.9 | 4  | 10 | 4  | 1.067 | 1.048 | 1.031 | 0.972 | 0.949 | 0.936 | 0.908 | 2.88E-03 |
| cds.Camellia_sinensis.comp2737_0_c0_seq1_m.26641 | PREDICTED: DNA damage-inducible protein 1 [Pyrus x bretschneideri]                                        | 44.15  | 132.92 | 44.1 | 13 | 17 | 13 | 0.958 | 0.998 | 0.933 | 1.049 | 1.043 | 1.062 | 1.092 | 1.22E-02 |
| cds.Camellia_sinensis.comp2737_2_c0_seq1_m.36694 | PREDICTED: probable carbohydrate esterase At4g34215 [Lupinus angustifolius]                               | 27.091 | 2.8298 | 8.5  | 2  | 3  | 2  | 0.945 | 0.927 | 0.973 | 0.919 | 1.164 | 1.093 | 1.116 | 2.18E-01 |



|                                                  |                                                                               |        |        |      |   |    |   |       |       |       |       |       |       |       |          |
|--------------------------------------------------|-------------------------------------------------------------------------------|--------|--------|------|---|----|---|-------|-------|-------|-------|-------|-------|-------|----------|
| cds.Camellia_sinensis.comp2738_1_c0_seq1_m.37044 | DNA-binding family protein [Populus trichocarpa]                              | 15.279 | 38.968 | 34.3 | 4 | 8  | 4 | 0.959 | 0.961 | 0.993 | 1.026 | 1.021 | 1.046 | 1.062 | 1.12E-02 |
|                                                  | PREDICTED:                                                                    |        |        |      |   |    |   |       |       |       |       |       |       |       |          |
| cds.Camellia_sinensis.comp2738_4_c0_seq1_m.32444 | xyloglucan endotransglucosylase/hydrolase protein 9 [Gossypium arboreum]      | 33.85  | 4.9624 | 12.5 | 4 | 5  | 4 | 1.145 | 1.211 | 1.132 | 0.887 | 0.77  | 0.834 | 0.714 | 1.82E-03 |
|                                                  | PREDICTED: ADP-ribosylation factor 1 isoform X1 [Fragaria vesca subsp. vesca] |        |        |      |   |    |   |       |       |       |       |       |       |       |          |
| cds.Camellia_sinensis.comp2738_5_c1_seq2_m.39231 |                                                                               | 20.666 | 80.293 | 32   | 6 | 24 | 6 | 1.012 | 0.994 | 0.98  | 1.006 | 1.008 | 0.991 | 1.006 | 5.83E-01 |
|                                                  | PREDICTED: 60S acidic ribosomal protein P3-like [Nelumbo nucifera]            |        |        |      |   |    |   |       |       |       |       |       |       |       |          |
| cds.Camellia_sinensis.comp2738_6_c1_seq1_m.47223 |                                                                               | 12.775 | 42.232 | 21.6 | 2 | 5  | 2 | 1.006 | 1.061 | 1.1   | 0.937 | 0.981 | 0.924 | 0.897 | 2.69E-02 |

|                                             |                                    |                   |        |      |   |   |   |       |       |       |       |       |       |       |          |
|---------------------------------------------|------------------------------------|-------------------|--------|------|---|---|---|-------|-------|-------|-------|-------|-------|-------|----------|
| PREDICT                                     |                                    |                   |        |      |   |   |   |       |       |       |       |       |       |       |          |
| cds.Camellia_sinensis                       | ED: clathrin interactor            | 41.831            | 6.3554 | 8.5  | 2 | 2 | 2 | 1.166 | 1.098 | 1.042 | 0.852 | 0.853 | 0.952 | 0.804 | 1.12E-02 |
| .comp2739                                   | 7_c0_seq1                          | [Vitis vinifera]  |        |      |   |   |   |       |       |       |       |       |       |       |          |
| _m.13150                                    | PREDICT                            |                   |        |      |   |   |   |       |       |       |       |       |       |       |          |
| ED: clathrin interactor                     |                                    |                   |        |      |   |   |   |       |       |       |       |       |       |       |          |
| cds.Camellia_sinensis                       | ED: EPSIN 1 isoform X2             | 15.393            | 2.8204 | 21.5 | 3 | 4 | 3 | 1.086 | 1.064 | 1.06  | 0.943 | 0.904 | 0.929 | 0.865 | 5.57E-04 |
| .comp2739                                   | 7_c0_seq1                          | [Theobroma cacao] |        |      |   |   |   |       |       |       |       |       |       |       |          |
| _m.13151                                    | PREDICT                            |                   |        |      |   |   |   |       |       |       |       |       |       |       |          |
| ED: membrane steroid-binding protein 2-like |                                    |                   |        |      |   |   |   |       |       |       |       |       |       |       |          |
| cds.Camellia_sinensis                       | ED: purple acid phosphatase 3-like | 21.237            | 5.9064 | 12.4 | 2 | 2 | 2 | 1.07  | 1.159 | 1.04  | 0.89  | 0.898 | 0.921 | 0.829 | 5.34E-03 |
| .comp2740                                   | 2_c0_seq1                          | [Sesamum indicum] |        |      |   |   |   |       |       |       |       |       |       |       |          |
| _m.37995                                    | PREDICT                            |                   |        |      |   |   |   |       |       |       |       |       |       |       |          |
| ED: purple acid phosphatase 3-like          |                                    |                   |        |      |   |   |   |       |       |       |       |       |       |       |          |
| cds.Camellia_sinensis                       | ED: PHD finger protein Alfin1      | 32.283            | 80.407 | 16.6 | 4 | 7 | 4 | 0.992 | 1.02  | 0.957 | 1.055 | 0.956 | 1.007 | 1.017 | 6.64E-01 |
| .comp2742                                   | 2_c0_seq1                          | [Ziziphus jujuba] |        |      |   |   |   |       |       |       |       |       |       |       |          |
| _m.41621                                    | PREDICT                            |                   |        |      |   |   |   |       |       |       |       |       |       |       |          |
| ED: PHD finger protein Alfin1               |                                    |                   |        |      |   |   |   |       |       |       |       |       |       |       |          |
| cds.Camellia_sinensis                       | ED: PHD finger protein Alfin1      | 27.815            | 1.9488 | 4    | 1 | 1 | 1 |       |       |       |       |       |       |       |          |
| .comp2742                                   | 5_c0_seq2                          | [Vitis vinifera]  |        |      |   |   |   |       |       |       |       |       |       |       |          |
| _m.35521                                    |                                    |                   |        |      |   |   |   |       |       |       |       |       |       |       |          |

|                                                 |                                                                             |        |        |      |   |    |   |       |       |       |       |       |       |       |          |
|-------------------------------------------------|-----------------------------------------------------------------------------|--------|--------|------|---|----|---|-------|-------|-------|-------|-------|-------|-------|----------|
| cds.Camellia_sinensis.comp27426_c0_seq1_m.30120 | PREDICT<br>ED: ras-related protein RABA1f [Tarenaya hassleriana]            | 24.061 | 37.428 | 42.1 | 8 | 17 | 3 | 0.977 | 0.978 | 1.01  | 1.039 | 1.037 | 1.01  | 1.041 | 4.81E-02 |
| cds.Camellia_sinensis.comp27440_c0_seq2_m.52441 |                                                                             | 14.454 | 3.4121 | 8.5  | 1 | 1  | 1 | 0.995 | 0.971 | 0.919 | 1.028 | 1.021 | 1.082 | 1.085 | 5.12E-02 |
| cds.Camellia_sinensis.comp27449_c0_seq1_m.35876 | PREDICT<br>ED: alpha carbonic anhydrase 1, chloroplastic [Prunus mume]      | 30.787 | 10.077 | 9.7  | 3 | 5  | 3 | 0.927 | 0.937 | 0.961 | 1.024 | 1.109 | 1.017 | 1.115 | 2.21E-02 |
| cds.Camellia_sinensis.comp27451_c0_seq1_m.19603 | domain-containing family protein [Populus trichocarpa]                      | 45.301 | 6.4934 | 4.6  | 2 | 3  | 2 | 0.989 | 0.93  | 0.916 | 1.024 | 1.097 | 1.065 | 1.124 | 1.91E-02 |
| cds.Camellia_sinensis.comp27452_c0_seq1_m.38379 | PREDICT<br>ED: acyl carrier protein 1, chloroplastic-like [Citrus sinensis] | 19.958 | 11.939 | 8.1  | 1 | 2  | 1 | 1.035 | 1.178 | 1.142 | 0.8   | 0.903 | 0.915 | 0.78  | 1.27E-02 |



|                                                  |                                                                                  |        |        |      |    |    |    |       |       |       |       |       |       |       |          |
|--------------------------------------------------|----------------------------------------------------------------------------------|--------|--------|------|----|----|----|-------|-------|-------|-------|-------|-------|-------|----------|
|                                                  | PREDICT                                                                          |        |        |      |    |    |    |       |       |       |       |       |       |       |          |
|                                                  | ED:                                                                              |        |        |      |    |    |    |       |       |       |       |       |       |       |          |
|                                                  | probable                                                                         |        |        |      |    |    |    |       |       |       |       |       |       |       |          |
| cds.Camellia_sinensis.comp2747_1_c0_seq1_m.27836 | plastid-lipid-associated protein 3, chloroplastic [Nelumbo nucifera]             | 42.804 | 41.71  | 26.3 | 8  | 16 | 7  | 1.092 | 1.141 | 1.127 | 0.883 | 0.815 | 0.867 | 0.763 | 6.02E-04 |
|                                                  | PREDICT                                                                          |        |        |      |    |    |    |       |       |       |       |       |       |       |          |
|                                                  | ED:                                                                              |        |        |      |    |    |    |       |       |       |       |       |       |       |          |
| cds.Camellia_sinensis.comp2747_1_c0_seq2_m.31372 | plastoglobulin-1, chloroplastic-like [Ziziphus jujuba]                           | 39.315 | 207.37 | 41.1 | 12 | 34 | 11 | 0.954 | 0.962 | 0.947 | 1.052 | 1.062 | 1.043 | 1.103 | 1.43E-04 |
|                                                  | PREDICT                                                                          |        |        |      |    |    |    |       |       |       |       |       |       |       |          |
|                                                  | ED:                                                                              |        |        |      |    |    |    |       |       |       |       |       |       |       |          |
| cds.Camellia_sinensis.comp2747_8_c0_seq1_m.19271 | histone deacetylase 6 [Vitis vinifera]                                           | 53.96  | 8.1069 | 7.6  | 3  | 3  | 3  | 0.845 | 0.985 | 1     | 1.115 | 0.984 | 1.036 | 1.108 | 1.85E-01 |
|                                                  | PREDICT                                                                          |        |        |      |    |    |    |       |       |       |       |       |       |       |          |
|                                                  | ED: ATP-dependent Clp                                                            |        |        |      |    |    |    |       |       |       |       |       |       |       |          |
| cds.Camellia_sinensis.comp2748_0_c0_seq2_m.34221 | protease proteolytic subunit-related protein 2, chloroplastic [Nelumbo nucifera] | 33.025 | 62.439 | 18.1 | 6  | 15 | 6  | 0.97  | 1.026 | 1.05  | 0.994 | 0.955 | 0.965 | 0.957 | 1.72E-01 |



|                                                  |                                                                                                   |        |        |      |   |   |   |       |       |       |       |       |       |       |          |
|--------------------------------------------------|---------------------------------------------------------------------------------------------------|--------|--------|------|---|---|---|-------|-------|-------|-------|-------|-------|-------|----------|
| cds.Camellia_sinensis.comp2748_3_c0_seq1_m.24196 | PREDICT<br>ED: UDP-glycosyltransferase 84B1 [Vitis vinifera]                                      | 53.436 | 106.81 | 10.9 | 4 | 5 | 4 | 1.012 | 1.001 | 0.96  | 1.025 | 1.014 | 1.029 | 1.032 | 1.30E-01 |
| cds.Camellia_sinensis.comp2749_0_c0_seq1_m.38291 | PREDICT<br>ED: acyl-acyl carrier protein thioesterase ATL3, chloroplast ic-like [Ziziphus jujuba] | 25.853 | 3.4594 | 8.3  | 2 | 2 | 2 | 1.046 | 1.066 | 0.967 | 0.959 | 0.882 | 1.072 | 0.946 | 4.17E-01 |
| cds.Camellia_sinensis.comp2749_7_c0_seq1_m.32426 | PREDICT<br>ED: translin [Theobroma cacao]                                                         | 33.965 | 13.927 | 13.4 | 4 | 4 | 4 | 1.057 | 0.99  | 0.987 | 0.961 | 0.983 | 1.02  | 0.977 | 4.60E-01 |
| cds.Camellia_sinensis.comp2749_8_c0_seq1_m.4383  | PREDICT<br>ED: protein QUIRKY [Capsicum annuum]                                                   | 89.603 | 12.862 | 5.6  | 3 | 3 | 3 | 0.967 | 0.826 | 1.02  | 1.065 | 0.964 | 1.078 | 1.105 | 2.32E-01 |

|                                                  |                                                                                                                              |        |        |      |    |    |    |       |       |       |       |       |       |       |          |
|--------------------------------------------------|------------------------------------------------------------------------------------------------------------------------------|--------|--------|------|----|----|----|-------|-------|-------|-------|-------|-------|-------|----------|
| cds.Camellia_sinensis.comp2750_2_c0_seq1_m.16363 | PREDICTED:<br>ribonuclease III domain-containing protein RNC1, chloroplast ic-like isoform X1 [Daucus carota subsp. sativus] | 62.479 | 3.4285 | 6.6  | 4  | 4  | 4  | 0.998 | 0.922 | 0.954 | 1.035 | 1.069 | 1.042 | 1.095 | 2.20E-02 |
| cds.Camellia_sinensis.comp2750_5_c0_seq1_m.31043 | PREDICTED:<br>magnesium protoporphyrin IX methyltransferase, chloroplast ic-like [Ipomoea]                                   | 36.571 | 105.07 | 37.5 | 11 | 18 | 11 | 1.091 | 1.059 | 1.061 | 0.932 | 0.874 | 0.956 | 0.86  | 5.96E-03 |
| cds.Camellia_sinensis.comp2750_6_c0_seq1_m.52015 | PREDICTED:<br>glutamate synthase [NADH], amyloplast ic-like [Nicotiana tomentosiformis]                                      | 18.876 | 2.0804 | 4.7  | 1  | 1  | 1  | 0.95  | 0.999 | 0.964 | 1.037 | 0.992 | 1.077 | 1.066 | 8.54E-02 |

|                                |                                                                                        |        |        |      |   |    |   |       |       |       |       |       |       |       |          |
|--------------------------------|----------------------------------------------------------------------------------------|--------|--------|------|---|----|---|-------|-------|-------|-------|-------|-------|-------|----------|
| cds.Camellia_sinensis.comp2750 | PREDICT<br>ED: inter-alpha-trypsin inhibitor heavy chain H3-like [Zea mays]            | 55.889 | 11.287 | 6.6  | 3 | 4  | 3 | 1.033 | 1.094 | 0.984 | 0.906 | 0.963 | 0.977 | 0.915 | 8.21E-02 |
| cds.Camellia_sinensis.comp2751 | PREDICT<br>ED: lipid phosphate phosphatase gamma, chloroplastic-like [Sesamum indicum] | 25.546 | 8.7639 | 6.7  | 2 | 2  | 2 | 0.944 | 1.027 | 1.023 | 1.012 | 0.978 | 1.031 | 1.009 | 7.78E-01 |
| cds.Camellia_sinensis.comp2751 | PREDICT<br>ED: thiol protease aleurain-like [Ziziphus jujuba]                          | 42.854 | 42.194 | 19.2 | 7 | 16 | 7 | 1.049 | 1.012 | 1.032 | 0.974 | 0.956 | 0.973 | 0.939 | 6.22E-03 |
| cds.Camellia_sinensis.comp2751 | PREDICT<br>ED: reticulon-like protein B9 [Nicotiana tabacum]                           | 25.305 | 1.3201 | 4.1  | 1 | 1  | 1 | 1.007 | 1.01  | 1.018 | 1.02  | 0.904 | 1.047 | 0.979 | 6.58E-01 |

|                                                  |                                                                             |        |        |      |   |    |   |       |       |       |       |       |       |       |          |
|--------------------------------------------------|-----------------------------------------------------------------------------|--------|--------|------|---|----|---|-------|-------|-------|-------|-------|-------|-------|----------|
|                                                  | PREDICT<br>ED:                                                              |        |        |      |   |    |   |       |       |       |       |       |       |       |          |
| cds.Camellia_sinensis.comp2752_0_c0_seq1_m.29804 | probable serine/threonine-protein kinase roco9 [Arachis ipaensis]           | 21.767 | 49.026 | 41.5 | 7 | 10 | 7 | 1.029 | 0.976 | 0.952 | 1.01  | 0.98  | 1.023 | 1.019 | 5.06E-01 |
|                                                  | PREDICT<br>ED:                                                              |        |        |      |   |    |   |       |       |       |       |       |       |       |          |
| cds.Camellia_sinensis.comp2752_0_c0_seq1_m.29805 | probable serine/threonine-protein kinase roco9 [Vigna radiata var. radiata] | 14.541 | 8.1939 | 24   | 3 | 7  | 3 | 0.99  | 0.98  | 1.027 | 1.025 | 1.011 | 0.956 | 0.998 | 9.44E-01 |
|                                                  | PREDICT<br>ED:                                                              |        |        |      |   |    |   |       |       |       |       |       |       |       |          |
| cds.Camellia_sinensis.comp2753_3_c1_seq1_m.26941 | protein PHR1-LIKE 1-like [Malus domestica]                                  | 26.186 | 2.2212 | 3.7  | 1 | 1  | 1 | 1.077 | 1.104 | 1.031 | 0.994 | 0.938 | 0.845 | 0.865 | 4.60E-02 |
|                                                  | PREDICT<br>ED:                                                              |        |        |      |   |    |   |       |       |       |       |       |       |       |          |
| cds.Camellia_sinensis.comp2753_6_c0_seq1_m.28571 | spermidine sinapoyl-CoA acyltransferase [Juglans regia]                     | 47.381 | 17.178 | 5.4  | 2 | 2  | 2 | 1.008 | 1.061 | 1.102 | 0.96  | 0.987 | 0.881 | 0.892 | 5.51E-02 |

|                                                  |                                                                                                      |        |        |      |    |    |    |       |       |       |       |       |       |       |          |
|--------------------------------------------------|------------------------------------------------------------------------------------------------------|--------|--------|------|----|----|----|-------|-------|-------|-------|-------|-------|-------|----------|
|                                                  | PREDICT<br>ED:                                                                                       |        |        |      |    |    |    |       |       |       |       |       |       |       |          |
| cds.Camellia_sinensis.comp2755_0_c0_seq1_m.19114 | cinnamate beta-D-glucosyltransferase-like [Juglans regia]                                            | 54.496 | 68.16  | 26.1 | 11 | 20 | 11 | 1.055 | 1.122 | 1.066 | 0.936 | 0.944 | 0.921 | 0.864 | 2.00E-03 |
|                                                  | PREDICT<br>ED:                                                                                       |        |        |      |    |    |    |       |       |       |       |       |       |       |          |
| cds.Camellia_sinensis.comp2755_5_c0_seq1_m.29295 | threonine synthase, chloroplastic [Sesamum indicum]                                                  | 50.394 | 4.5286 | 12.9 | 5  | 6  | 2  | 1.023 | 0.956 | 1.038 | 1.057 | 1.033 | 0.906 | 0.993 | 8.82E-01 |
|                                                  | PREDICT<br>ED: alpha-1,4 glucan phosphorylase L isozyme, chloroplastic/amyloplastic [Vitis vinifera] |        |        |      |    |    |    |       |       |       |       |       |       |       |          |
| cds.Camellia_sinensis.comp2755_7_c0_seq2_m.24018 | ase L isozyme, chloroplastic/amyloplastic [Vitis vinifera]                                           | 50.548 | 2.3968 | 5.7  | 3  | 3  | 1  | 0.998 | 1.124 | 1.067 | 0.9   | 0.958 | 0.946 | 0.879 | 3.14E-02 |
|                                                  | PREDICT<br>ED:                                                                                       |        |        |      |    |    |    |       |       |       |       |       |       |       |          |
| cds.Camellia_sinensis.comp2756_1_c0_seq1_m.6073  | probable plastidic glucose transporter 1 isoform X1 [Vitis vinifera]                                 | 61.63  | 18.549 | 5.5  | 3  | 4  | 3  | 1.021 | 0.953 | 1.017 | 0.998 | 1.02  | 1.038 | 1.022 | 4.32E-01 |



|                                                 |                                                                                 |        |        |      |   |   |   |       |       |       |       |       |       |       |          |
|-------------------------------------------------|---------------------------------------------------------------------------------|--------|--------|------|---|---|---|-------|-------|-------|-------|-------|-------|-------|----------|
| cds.Camellia_sinensis.comp27573_c0_seq1_m.18451 | PREDICT<br>ED: long chain biosynthesis protein 2a [Vitis vinifera]              | 57.173 | 20.358 | 9.6  | 6 | 6 | 6 | 0.977 | 0.983 | 1.031 | 1.025 | 1.025 | 1.018 | 1.026 | 2.73E-01 |
| cds.Camellia_sinensis.comp27578_c0_seq1_m.30937 | transmembrane protein, putative [Medicago truncatula]                           | 28.655 | 2.1442 | 8.5  | 2 | 2 | 2 |       |       |       |       |       |       |       |          |
| cds.Camellia_sinensis.comp27580_c0_seq1_m.32417 | PREDICT<br>ED: 3-ketoacyl-CoA thiolase 2, peroxisomal [Prunus mume]             | 41.837 | 7.6884 | 11.8 | 4 | 9 | 2 | 1.097 | 0.946 | 1.029 | 0.985 | 0.998 | 0.941 | 0.952 | 3.61E-01 |
| cds.Camellia_sinensis.comp27582_c0_seq1_m.20285 | PREDICT<br>ED: cytochrome P450 71A1-like isoform X2 [Populus euphratica]        | 58.265 | 37.586 | 6.4  | 3 | 4 | 3 | 0.934 | 1.02  | 0.947 | 1.07  | 1.034 | 1.065 | 1.092 | 3.88E-02 |
| cds.Camellia_sinensis.comp27590_c0_seq1_m.35340 | PREDICT<br>ED: psbP domain-containing protein 5, chloroplastic [Vitis vinifera] | 28.41  | 24.618 | 22.4 | 5 | 7 | 5 | 1.01  | 1.039 | 1.087 | 0.952 | 0.957 | 0.93  | 0.905 | 1.28E-02 |





|                                |                                                                                                                            |        |        |      |   |    |   |       |       |       |       |       |       |       |          |
|--------------------------------|----------------------------------------------------------------------------------------------------------------------------|--------|--------|------|---|----|---|-------|-------|-------|-------|-------|-------|-------|----------|
| cds.Camellia_sinensis.comp2760 | PREDICT<br>ED: zinc<br>finger<br>CCCH<br>domain-<br>containing<br>protein 14<br>[Vitis<br>vinifera]<br>uncharacte          | 31.76  | 44.513 | 23.4 | 6 | 10 | 5 | 1.001 | 0.984 | 1.038 | 1.003 | 0.991 | 0.949 | 0.974 | 3.08E-01 |
| cds.Camellia_sinensis.comp2761 | rized<br>LOC82785<br>73<br>precursor<br>[Ricinus<br>communis]                                                              | 43.521 | 24.778 | 14.6 | 4 | 5  | 4 | 0.927 | 0.827 | 0.888 | 1.108 | 1.174 | 1.15  | 1.299 | 2.16E-03 |
| cds.Camellia_sinensis.comp2762 | PREDICT<br>ED:<br>protein<br>CHAPER<br>ONE-<br>LIKE<br>PROTEIN<br>OF POR1,<br>chloroplast<br>ic<br>[Erythra<br>he guttata] | 28.077 | 22.179 | 6.4  | 1 | 2  | 1 | 0.958 | 0.984 | 1.071 | 0.966 | 1.09  | 0.947 | 0.997 | 9.44E-01 |
| cds.Camellia_sinensis.comp2762 | formimido<br>yltransfera<br>se-<br>cyclodeam<br>inase-like<br>[Juglans<br>regia]                                           | 32.116 | 12.239 | 13.8 | 4 | 6  | 4 | 0.969 | 0.983 | 1.052 | 0.994 | 0.984 | 0.964 | 0.979 | 4.93E-01 |

|                                                  |                                                                                             |        |        |      |   |    |   |       |       |       |       |       |       |       |          |
|--------------------------------------------------|---------------------------------------------------------------------------------------------|--------|--------|------|---|----|---|-------|-------|-------|-------|-------|-------|-------|----------|
| cds.Camellia_sinensis.comp2763_0_c0_seq1_m.38510 | PREDICT<br>ED: 40S<br>ribosomal<br>protein S8<br>isoform<br>X2 [Zea<br>mays]                | 28.739 | 2.8368 | 19.8 | 4 | 5  | 1 | 0.994 | 1.088 | 1.265 | 0.882 | 0.889 | 0.869 | 0.789 | 8.13E-02 |
| cds.Camellia_sinensis.comp2763_0_c0_seq2_m.38611 | PREDICT<br>ED: 40S<br>ribosomal<br>protein S8-<br>like [Oryza<br>brachyantha]               | 25.06  | 34.033 | 29.3 | 5 | 9  | 2 | 1.172 | 0.984 | 1.124 | 0.826 | 0.895 | 0.992 | 0.827 | 6.40E-02 |
| cds.Camellia_sinensis.comp2763_4_c0_seq1_m.32545 | rubredoxin<br>family<br>protein<br>[Arabidopsis<br>lyrata<br>subsp.<br>lyrata]              | 28.596 | 35.847 | 22.9 | 6 | 10 | 6 | 1.097 | 1.038 | 1.011 | 0.941 | 0.955 | 0.976 | 0.913 | 2.61E-02 |
| cds.Camellia_sinensis.comp2763_6_c0_seq1_m.40910 | PREDICT<br>ED: basic<br>transcription<br>factor 3<br>[Eucalyptus<br>grandis]                | 21.115 | 4.7737 | 9.7  | 3 | 5  | 3 | 1.141 | 1.131 | 1.128 | 0.85  | 0.849 | 0.829 | 0.744 | 2.38E-06 |
| cds.Camellia_sinensis.comp2763_9_c0_seq1_m.6860  | PREDICT<br>ED:<br>ubiquitin<br>carboxyl-<br>terminal<br>hydrolase<br>14 [Vitis<br>vinifera] | 63.227 | 59.972 | 15.2 | 7 | 11 | 7 | 0.95  | 0.938 | 0.984 | 1.051 | 1.058 | 1.06  | 1.103 | 2.48E-03 |

|                                                  |                                                                                    |        |        |      |   |   |   |       |       |       |       |       |       |       |          |
|--------------------------------------------------|------------------------------------------------------------------------------------|--------|--------|------|---|---|---|-------|-------|-------|-------|-------|-------|-------|----------|
| cds.Camellia_sinensis.comp2763_9_c0_seq1_m.6861  | PREDICT ED: ubiquitin carboxyl-terminal hydrolase 14 isoform X2 [Ricinus communis] | 35.039 | 8.6086 | 13.1 | 4 | 7 | 4 | 0.953 | 1.015 | 0.988 | 1.051 | 1.034 | 0.984 | 1.038 | 2.37E-01 |
| cds.Camellia_sinensis.comp2764_3_c0_seq3_m.32360 | PREDICT ED: phosphatidate cytidylyltransferase 4, chloroplastic [Theobroma cacao]  | 39.497 | 2.1629 | 4.6  | 2 | 2 | 2 | 0.78  | 1.023 | 1     | 1.041 | 1.127 | 1.076 | 1.157 | 1.64E-01 |
| cds.Camellia_sinensis.comp2764_4_c0_seq2_m.7911  | PREDICT ED: neutral ceramidase [Gossypium raimondii]                               | 86.825 | 15.218 | 8.1  | 6 | 7 | 6 | 0.988 | 1.046 | 0.998 | 1.02  | 0.936 | 1.028 | 0.984 | 6.59E-01 |
| cds.Camellia_sinensis.comp2764_8_c0_seq1_m.18793 | PREDICT ED: serine carboxypeptidase-like 17 [Juglans regia]                        | 53.498 | 4.0866 | 4.5  | 2 | 2 | 2 | 1.12  | 1.125 | 0.993 | 0.909 | 0.899 | 0.929 | 0.845 | 1.66E-02 |

|                                                  |                                                                                                                                            |        |        |      |    |    |   |       |       |       |       |       |       |       |          |
|--------------------------------------------------|--------------------------------------------------------------------------------------------------------------------------------------------|--------|--------|------|----|----|---|-------|-------|-------|-------|-------|-------|-------|----------|
| cds.Camellia_sinensis.comp2765_2_c0_seq1_m.42586 | PREDICTED: iron-sulfur assembly protein IscA-like 1, mitochondrial [Ricinus communis] sucrase-related family protein [Populus trichocarpa] | 15.238 | 1.8241 | 8.5  | 1  | 1  | 1 | 0.992 | 1.034 | 0.931 | 1.066 | 0.967 | 1.023 | 1.033 | 4.71E-01 |
| cds.Camellia_sinensis.comp2765_7_c0_seq1_m.25906 | plant/F14 D7-9 protein [Medicago truncatula]                                                                                               | 47.584 | 2.3719 | 5.1  | 2  | 2  | 2 | 1.055 | 1.015 | 0.978 | 1.056 | 0.965 | 0.935 | 0.97  | 5.00E-01 |
| cds.Camellia_sinensis.comp2765_8_c0_seq1_m.25591 | PREDICTED: SKP1-like protein 1A isoform X1 [Nicotiana tomentosiformis]                                                                     | 32.41  | 40.931 | 17.4 | 4  | 4  | 3 | 0.983 | 0.985 | 0.991 | 1.066 | 0.955 | 1.035 | 1.033 | 4.44E-01 |
| cds.Camellia_sinensis.comp2766_4_c0_seq1_m.40058 | PREDICTED: eukaryotic initiation factor 4A-8 [Pyrus x bretschneideri]                                                                      | 17.537 | 35.622 | 35.5 | 9  | 17 | 6 | 1.004 | 0.975 | 0.984 | 1.013 | 1.044 | 1.017 | 1.037 | 4.56E-02 |
| cds.Camellia_sinensis.comp2767_1_c0_seq1_m.35572 |                                                                                                                                            | 28.743 | 112.64 | 53   | 14 | 44 | 5 | 0.933 | 0.965 | 0.931 | 1.047 | 1.053 | 1.124 | 1.14  | 6.98E-03 |

|                                |                                                                                                     |        |        |      |    |    |    |       |       |       |       |       |       |       |          |
|--------------------------------|-----------------------------------------------------------------------------------------------------|--------|--------|------|----|----|----|-------|-------|-------|-------|-------|-------|-------|----------|
| cds.Camellia_sinensis.comp2768 | protein ACI14 [Solanum lycopersicum]                                                                | 35.892 | 9.3945 | 9.4  | 3  | 3  | 3  | 0.962 | 1.128 | 0.956 | 1.016 | 0.936 | 1.01  | 0.972 | 6.92E-01 |
| cds.Camellia_sinensis.comp2769 |                                                                                                     | 21.543 | 48.246 | 37.8 | 6  | 7  | 6  | 0.927 | 0.974 | 1.022 | 1.063 | 0.97  | 1.038 | 1.051 | 2.77E-01 |
| cds.Camellia_sinensis.comp2769 | Translation initiation factor eIF-2B subunit delta [Morus notabilis] PREDICTED: plant intracellular | 42.783 | 3.6592 | 5.5  | 2  | 3  | 2  | 1.136 | 1.078 | 1.101 | 0.868 | 0.867 | 0.919 | 0.801 | 8.19E-04 |
| cds.Camellia_sinensis.comp2770 | ras-related LRR protein 1-like [Ziziphus jujuba] PREDICTED:                                         | 57.25  | 2.0581 | 1.9  | 1  | 2  | 1  | 0.96  | 0.937 | 1.032 | 1.077 | 0.959 | 1.056 | 1.056 | 3.09E-01 |
| cds.Camellia_sinensis.comp2770 | hsp70-Hsp90 organizing protein 3-like [Ipomoea nil]                                                 | 65.897 | 183.96 | 54.5 | 32 | 54 | 24 | 1.031 | 1.057 | 1.082 | 0.946 | 0.941 | 0.94  | 0.892 | 1.48E-02 |



|                                |                                                                   |        |        |      |    |    |   |       |       |       |       |       |       |       |          |
|--------------------------------|-------------------------------------------------------------------|--------|--------|------|----|----|---|-------|-------|-------|-------|-------|-------|-------|----------|
|                                | PREDICT                                                           |        |        |      |    |    |   |       |       |       |       |       |       |       |          |
|                                | ED:                                                               |        |        |      |    |    |   |       |       |       |       |       |       |       |          |
| cds.Camellia_sinensis.comp2772 | histone-lysine N-methyltransferase setd3-like [Nicotiana tabacum] | 16.996 | 1.3464 | 5.9  | 1  | 1  | 1 | 1.035 | 0.953 | 1.114 | 0.993 | 0.936 | 0.97  | 0.935 | 2.43E-01 |
|                                | PREDICT                                                           |        |        |      |    |    |   |       |       |       |       |       |       |       |          |
|                                | ED:                                                               |        |        |      |    |    |   |       |       |       |       |       |       |       |          |
| cds.Camellia_sinensis.comp2774 | methyltransferase-like protein 7A [Vitis vinifera]                | 35.948 | 9.6453 | 6.6  | 2  | 4  | 2 | 0.953 | 0.977 | 1.015 | 1.04  | 1.004 | 1.084 | 1.062 | 1.05E-01 |
|                                | PREDICT                                                           |        |        |      |    |    |   |       |       |       |       |       |       |       |          |
|                                | ED:                                                               |        |        |      |    |    |   |       |       |       |       |       |       |       |          |
| cds.Camellia_sinensis.comp2774 | probable glutathione S-transferase parC [Nelumbo nucifera]        | 13.161 | 8.4596 | 35.7 | 6  | 14 | 6 | 1.006 | 0.983 | 0.958 | 0.985 | 1.04  | 1.028 | 1.036 | 1.80E-01 |
|                                | PREDICT                                                           |        |        |      |    |    |   |       |       |       |       |       |       |       |          |
|                                | ED:                                                               |        |        |      |    |    |   |       |       |       |       |       |       |       |          |
| cds.Camellia_sinensis.comp2774 | protein FLX-like 3 [Nicotiana tabacum]                            | 30.174 | 36.913 | 32.1 | 10 | 15 | 9 | 0.967 | 0.948 | 0.984 | 1.029 | 1.025 | 1.049 | 1.07  | 6.24E-03 |





|                                |                   |                                                                                                                                                                                      |        |        |      |    |    |    |       |       |       |       |       |       |       |          |
|--------------------------------|-------------------|--------------------------------------------------------------------------------------------------------------------------------------------------------------------------------------|--------|--------|------|----|----|----|-------|-------|-------|-------|-------|-------|-------|----------|
| cds.Camellia_sinensis.comp2776 | 7_c0_seq1_m.16273 | PREDICT<br>ED:<br>abscisate<br>beta-<br>glucosyltra<br>nsferase<br>[Eucalyptu<br>s grandis]<br>transmemb<br>rane                                                                     | 53.201 | 65.096 | 17.5 | 9  | 15 | 9  | 0.952 | 0.982 | 0.981 | 1.07  | 0.993 | 1.015 | 1.056 | 9.11E-02 |
| cds.Camellia_sinensis.comp2777 | 6_c0_seq1_m.46698 | protein,<br>putative<br>[Medicago<br>truncatula]<br>PREDICT<br>ED: ATP<br>synthase<br>subunit O,<br>mitochond<br>rial<br>[Erythran<br>the guttata]<br>PREDICT<br>ED: ras-<br>related | 18.786 | 3.3119 | 12.2 | 2  | 2  | 2  | 0.995 | 1.033 | 1.001 | 0.92  | 1.087 | 0.97  | 0.983 | 7.18E-01 |
| cds.Camellia_sinensis.comp2778 | 2_c0_seq1_m.29375 | protein<br>RAB1c<br>isoform<br>X1<br>[Amborella<br>trichopoda<br>]                                                                                                                   | 32.228 | 78.023 | 39.3 | 12 | 34 | 12 | 1.036 | 0.998 | 1.03  | 0.986 | 0.978 | 0.968 | 0.957 | 2.63E-02 |
| cds.Camellia_sinensis.comp2778 | 7_c0_seq2_m.44511 | protein<br>RAB1c<br>isoform<br>X1<br>[Amborella<br>trichopoda<br>]                                                                                                                   | 21.341 | 95.928 | 43.1 | 6  | 12 | 4  | 0.998 | 0.993 | 0.974 | 0.998 | 1.041 | 1.076 | 1.051 | 1.01E-01 |

|                                |                   |                                                                                                                  |        |        |      |   |   |   |       |       |       |       |       |       |       |          |
|--------------------------------|-------------------|------------------------------------------------------------------------------------------------------------------|--------|--------|------|---|---|---|-------|-------|-------|-------|-------|-------|-------|----------|
| cds.Camellia_sinensis.comp2778 | 8_c0_seq1_m.26729 | PREDICT<br>ED: Golgi to ER traffic protein 4 homolog [Sesamum indicum]                                           | 37.336 | 4.5838 | 7    | 2 | 2 | 2 | 0.995 | 1.059 | 0.91  | 1.009 | 0.947 | 1.087 | 1.027 | 6.77E-01 |
| cds.Camellia_sinensis.comp2779 | 2_c0_seq1_m.11601 | PREDICT<br>ED: mannosyl-oligosaccharide 1,2-alpha-mannosidase MNS1-like [Nicotiana attenuata]                    | 23.408 | 14.129 | 25.7 | 5 | 7 | 5 | 1.05  | 1.069 | 1.157 | 0.897 | 0.884 | 0.926 | 0.826 | 4.42E-03 |
| cds.Camellia_sinensis.comp2779 | 6_c0_seq4_m.39734 | PREDICT<br>ED: 5-formyltetrahydrofolate cyclo-ligase-like protein COG0212 isoform X2 [Nicotiana tomentosiformis] | 28.227 | 8.1476 | 15   | 4 | 4 | 4 | 0.969 | 0.954 | 1.027 | 0.992 | 1.034 | 1.002 | 1.026 | 3.61E-01 |

|                                |                   |                                                                                                                        |        |        |      |    |    |    |       |       |       |       |       |       |       |          |
|--------------------------------|-------------------|------------------------------------------------------------------------------------------------------------------------|--------|--------|------|----|----|----|-------|-------|-------|-------|-------|-------|-------|----------|
| cds.Camellia_sinensis.comp2779 | 8_c0_seq1_m.6496  | PREDICTED:<br>protein<br>WEAK<br>CHLOROPLAST<br>MOVEMENT<br>NT<br>UNDER<br>BLUE<br>LIGHT 1-like<br>[Solanum tuberosum] | 100.35 | 7.4288 | 6.9  | 7  | 8  | 7  | 1.06  | 1.048 | 0.999 | 0.98  | 0.93  | 0.943 | 0.918 | 2.37E-02 |
| cds.Camellia_sinensis.comp2780 | 2_c0_seq1_m.27276 | PREDICTED: V-type<br>proton<br>ATPase<br>subunit C<br>[Nicotiana]                                                      | 42.381 | 76.035 | 25.9 | 11 | 16 | 11 | 0.993 | 1.005 | 0.988 | 1.02  | 1.005 | 1.013 | 1.017 | 5.97E-02 |
| cds.Camellia_sinensis.comp2780 | 6_c0_seq1_m.43057 | PREDICTED: 60S<br>ribosomal<br>protein<br>L24-like<br>[Jatropha curcas]                                                | 18.518 | 11.774 | 12.3 | 3  | 4  | 3  | 1.077 | 1.122 | 1.101 | 0.895 | 0.914 | 0.895 | 0.819 | 1.36E-04 |
| cds.Camellia_sinensis.comp2781 | 1_c0_seq1_m.22502 | PREDICTED:<br>protein<br>ABC17,<br>chloroplast<br>ic [Vitis<br>vinifera]                                               | 55.575 | 29.628 | 9.7  | 5  | 7  | 4  | 0.992 | 1.027 | 1.03  | 0.964 | 0.983 | 0.986 | 0.962 | 5.06E-02 |

|                                                  |                                                                                      |        |        |      |    |    |   |       |       |       |       |       |       |       |          |
|--------------------------------------------------|--------------------------------------------------------------------------------------|--------|--------|------|----|----|---|-------|-------|-------|-------|-------|-------|-------|----------|
| cds.Camellia_sinensis.comp2781_2_c0_seq1_m.19185 | PREDICT ED: inorganic phosphate transporter 1-4-like [Sesamum indicum]               | 58.905 | 11.545 | 7.3  | 5  | 5  | 4 | 0.867 | 0.915 | 0.95  | 1.184 | 1.017 | 1.102 | 1.209 | 2.13E-02 |
| cds.Camellia_sinensis.comp2781_8_c0_seq1_m.24693 | PREDICT ED: alpha-1,4-glucan-protein synthase [UDP-forming] 2 [Malus domestica]      | 49.056 | 79.383 | 35.3 | 15 | 32 | 7 | 1.038 | 1.036 | 1.018 | 0.995 | 0.982 | 0.973 | 0.954 | 6.32E-03 |
| cds.Camellia_sinensis.comp2781_8_c0_seq2_m.27266 | PREDICT ED: alpha-1,4-glucan-protein synthase [UDP-forming] [Pyrus x bretschneideri] | 48.174 | 8.9578 | 23.5 | 11 | 25 | 3 | 1.083 | 1.004 | 1.054 | 0.968 | 0.971 | 0.923 | 0.911 | 2.81E-02 |
| cds.Camellia_sinensis.comp2781_9_c0_seq2_m.28471 | PREDICT ED: high mobility group B protein 10 isoform X2 [Vitis vinifera]             | 36.777 | 1.3388 | 2.1  | 1  | 1  | 1 | 0.988 | 1.107 | 1.038 | 0.93  | 1.04  | 0.898 | 0.915 | 1.81E-01 |

|                                                  |                                                                                     |        |        |      |   |   |   |       |       |       |       |       |       |       |          |
|--------------------------------------------------|-------------------------------------------------------------------------------------|--------|--------|------|---|---|---|-------|-------|-------|-------|-------|-------|-------|----------|
| cds.Camellia_sinensis.comp2782_8_c0_seq1_m.36752 | PREDICTED: 3-oxoacyl-[acyl-carrier-protein] reductase FabG-like [Nicotiana tabacum] | 29.725 | 18.371 | 19.4 | 5 | 7 | 5 | 0.961 | 0.949 | 0.942 | 1.081 | 1.039 | 1.039 | 1.108 | 2.12E-03 |
| cds.Camellia_sinensis.comp2782_9_c0_seq1_m.21294 | PREDICTED: calcium-dependent protein kinase SK5-like [Solanum tuberosum]            | 48.345 | 14.644 | 12.1 | 4 | 7 | 4 | 0.958 | 0.956 | 1.055 | 1.079 | 0.943 | 1.03  | 1.028 | 6.24E-01 |
| cds.Camellia_sinensis.comp2784_7_c0_seq1_m.40758 | PREDICTED: ADP-ribosylation factor-like protein 8A isoform X1 [Capsicum annuum]     | 25.298 | 24.817 | 27.7 | 5 | 9 | 4 | 0.995 | 0.99  | 0.999 | 1.049 | 1.065 | 0.95  | 1.027 | 5.56E-01 |
| cds.Camellia_sinensis.comp2785_5_c0_seq2_m.26247 | PREDICTED: very-long-chain enoyl-CoA reductase isoform X1 [Vitis vinifera]          | 36.396 | 6.2256 | 9    | 3 | 4 | 3 | 1.099 | 1.257 | 1.193 | 0.876 | 0.743 | 0.791 | 0.679 | 3.32E-03 |

|                                |                   |                                                                                                       |        |        |      |   |   |   |       |       |       |       |       |       |       |          |
|--------------------------------|-------------------|-------------------------------------------------------------------------------------------------------|--------|--------|------|---|---|---|-------|-------|-------|-------|-------|-------|-------|----------|
| cds.Camellia_sinensis.comp2786 | 3_c0_seq1_m.16442 | PREDICTED:<br>internal alternative NAD(P)H-ubiquinone oxidoreductase A1, mitochondrial-like [Sesamum] | 56.426 | 7.8437 | 6.8  | 4 | 5 | 4 | 0.919 | 0.957 | 1.018 | 0.999 | 1.016 | 1.029 | 1.052 | 1.73E-01 |
| cds.Camellia_sinensis.comp2786 | 4_c0_seq1_m.32651 | ribosomal protein S6-like [Musa acuminata subsp. malaccensis]                                         | 28.348 | 5.7212 | 17.7 | 4 | 7 | 1 | 1.013 | 1.393 | 0.983 | 0.898 | 0.851 | 0.836 | 0.763 | 8.52E-02 |
| cds.Camellia_sinensis.comp2786 | 5_c0_seq1_m.35278 | PREDICTED:<br>protein CURVATURE THYLAKOID 1D, chloroplastic isoform X2 [Vitis vinifera]               | 23.502 | 19.589 | 16.2 | 3 | 4 | 3 | 0.959 | 1.017 | 1.037 | 1.011 | 1.016 | 0.971 | 0.995 | 8.74E-01 |
| cds.Camellia_sinensis.comp2786 | 6_c0_seq2_m.50182 | PREDICTED:<br>21 kDa protein [Prunus mume]                                                            | 14.686 | 11.886 | 16.2 | 2 | 2 | 2 | 1.001 | 0.972 | 0.987 | 0.992 | 1.056 | 1.005 | 1.031 | 2.16E-01 |

|                                |                                                                                 |        |        |      |    |    |    |       |       |       |       |       |       |       |          |
|--------------------------------|---------------------------------------------------------------------------------|--------|--------|------|----|----|----|-------|-------|-------|-------|-------|-------|-------|----------|
| cds.Camellia_sinensis.comp2787 | PREDICT<br>ED:<br>clathrin light chain 2-like<br>[Cucumis sativus]              | 29.03  | 11.628 | 20.5 | 5  | 8  | 4  | 1.029 | 1.071 | 1.043 | 0.995 | 0.93  | 0.949 | 0.914 | 1.81E-02 |
| cds.Camellia_sinensis.comp2787 | PREDICT<br>ED: prolyl endopeptidase<br>[Jatropha curcas]                        | 22.529 | 29.787 | 30.6 | 6  | 21 | 4  | 0.994 | 0.991 | 0.975 | 0.986 | 1     | 0.985 | 1.004 | 6.55E-01 |
| cds.Camellia_sinensis.comp2787 | aminotransferase 2 family protein<br>[Populus trichocarpa]                      | 24.805 | 55.619 | 56.4 | 12 | 23 | 12 | 1.016 | 1.005 | 1.003 | 0.979 | 1     | 0.972 | 0.976 | 6.00E-02 |
| cds.Camellia_sinensis.comp2787 | PREDICT<br>ED:<br>aspartate aminotransferase,<br>chloroplastic [Vitis vinifera] | 26.489 | 196.54 | 56   | 12 | 38 | 11 | 0.982 | 1.007 | 0.985 | 1.028 | 0.999 | 0.998 | 1.017 | 2.47E-01 |
| cds.Camellia_sinensis.comp2788 | PREDICT<br>ED:<br>pectinesterase<br>[Ricinus communis]                          | 53.21  | 6.199  | 2    | 1  | 2  | 1  | 0.958 | 1.07  | 1.033 | 1.027 | 0.917 | 1.004 | 0.963 | 4.72E-01 |





|                       |                                                                                                                                                        |        |        |      |   |   |   |       |       |       |       |       |       |       |          |
|-----------------------|--------------------------------------------------------------------------------------------------------------------------------------------------------|--------|--------|------|---|---|---|-------|-------|-------|-------|-------|-------|-------|----------|
| cds.Camellia_sinensis | PREDICTED: SAL1 phosphatase-like isoform X2 [Glycine max]                                                                                              | 15.268 | 18.903 | 26.6 | 4 | 7 | 4 | 1.012 | 0.992 | 0.982 | 1.021 | 0.985 | 1.019 | 1.013 | 4.27E-01 |
| cds.Camellia_sinensis | PREDICTED: FAD synthetase 2, chloroplastic [Daucus carota subsp. sativus]                                                                              | 23.008 | 1.8726 | 4.4  | 1 | 1 | 1 | 0.977 | 1.073 | 0.93  | 1.056 | 0.912 | 1.062 | 1.017 | 8.18E-01 |
| cds.Camellia_sinensis | PREDICTED: 3-hydroxyisobutyrate dehydrogenase-like 1, mitochondrial [Theobroma cacao] structural constituent of ribosome protein [Medicago truncatula] | 36.431 | 37.046 | 13.6 | 3 | 4 | 3 | 0.942 | 0.923 | 0.93  | 1.032 | 1.117 | 1.085 | 1.157 | 3.68E-03 |
| cds.Camellia_sinensis | PREDICTED: 3-hydroxyisobutyrate dehydrogenase-like 1, mitochondrial [Theobroma cacao] structural constituent of ribosome protein [Medicago truncatula] | 30.169 | 5.015  | 11.5 | 3 | 5 | 3 | 0.882 | 1.038 | 0.976 | 1.023 | 1.089 | 1.043 | 1.089 | 1.61E-01 |

|                                                  |                                                                       |        |        |      |   |    |   |       |       |       |       |       |       |       |          |
|--------------------------------------------------|-----------------------------------------------------------------------|--------|--------|------|---|----|---|-------|-------|-------|-------|-------|-------|-------|----------|
|                                                  | PREDICT                                                               |        |        |      |   |    |   |       |       |       |       |       |       |       |          |
|                                                  | ED:                                                                   |        |        |      |   |    |   |       |       |       |       |       |       |       |          |
| cds.Camellia_sinensis.comp2793_9_c0_seq1_m.20010 | bifunctional purple acid phosphatase 26-like [Juglans regia]          | 56.306 | 6.5291 | 3.9  | 1 | 1  | 1 | 1.106 | 0.797 | 1.048 | 1.106 | 1.126 | 0.834 | 1.039 | 7.95E-01 |
|                                                  | PREDICT                                                               |        |        |      |   |    |   |       |       |       |       |       |       |       |          |
|                                                  | ED:                                                                   |        |        |      |   |    |   |       |       |       |       |       |       |       |          |
| cds.Camellia_sinensis.comp2794_7_c0_seq1_m.40362 | eukaryotic translation initiation factor 4B3-like [Nicotiana tabacum] | 33.886 | 3.253  | 3.6  | 1 | 1  | 1 |       |       |       |       |       |       |       |          |
|                                                  | PREDICT                                                               |        |        |      |   |    |   |       |       |       |       |       |       |       |          |
|                                                  | ED: ras-related protein RHN1 isoform X2 [Vitis vinifera]              |        |        |      |   |    |   |       |       |       |       |       |       |       |          |
| cds.Camellia_sinensis.comp2794_9_c0_seq1_m.37702 | ED: ras-related protein RHN1 isoform X2 [Vitis vinifera]              | 20.595 | 56.108 | 41.8 | 7 | 15 | 5 | 0.952 | 0.935 | 0.946 | 1.01  | 1.066 | 1.095 | 1.119 | 9.96E-03 |
|                                                  | PREDICT                                                               |        |        |      |   |    |   |       |       |       |       |       |       |       |          |
|                                                  | ED: ras-related protein RHN1 isoform X1 [Vitis vinifera]              |        |        |      |   |    |   |       |       |       |       |       |       |       |          |
| cds.Camellia_sinensis.comp2794_9_c0_seq2_m.38344 | ED: ras-related protein RHN1 isoform X1 [Vitis vinifera]              | 22.398 | 4.9477 | 25.5 | 4 | 10 | 2 | 0.936 | 0.937 | 0.902 | 1.055 | 1.142 | 1.085 | 1.183 | 3.14E-03 |



|                       |                                                                                                                                                            |        |        |      |    |    |    |       |       |       |       |       |       |       |          |
|-----------------------|------------------------------------------------------------------------------------------------------------------------------------------------------------|--------|--------|------|----|----|----|-------|-------|-------|-------|-------|-------|-------|----------|
| cds.Camellia_sinensis | tagatose-6-phosphate ketose/aldose isomerase, putative (Mog1/PsbP/DUF179 5-like photosystem II reaction center PsbP family protein) [Arabidopsis thaliana] | 24.541 | 4.8023 | 20.1 | 4  | 5  | 4  | 1.006 | 0.969 | 0.994 | 0.995 | 1.007 | 1.039 | 1.024 | 2.32E-01 |
| cds.Camellia_sinensis | calmodulin-binding protein 60 C isoform X2 [Vitis vinifera]                                                                                                | 28.407 | 1.5849 | 9.4  | 3  | 3  | 1  | 0.943 | 1.024 | 1.05  | 0.941 | 1.013 | 1.039 | 0.992 | 8.68E-01 |
| cds.Camellia_sinensis | glutamyl-tRNA(Gln) amidotransferase subunit A, chloroplastic/mitochondrial [Ipomoea]                                                                       | 57.917 | 158.92 | 35.4 | 14 | 23 | 14 | 1.016 | 0.992 | 1.02  | 0.999 | 0.963 | 0.982 | 0.972 | 1.09E-01 |



|                                                  |                                                                                                      |        |        |      |    |    |    |       |       |       |       |       |       |       |          |
|--------------------------------------------------|------------------------------------------------------------------------------------------------------|--------|--------|------|----|----|----|-------|-------|-------|-------|-------|-------|-------|----------|
|                                                  | PREDICT                                                                                              |        |        |      |    |    |    |       |       |       |       |       |       |       |          |
|                                                  | ED:                                                                                                  |        |        |      |    |    |    |       |       |       |       |       |       |       |          |
| cds.Camellia_sinensis.comp2799_5_c0_seq2_m.34073 | NADPH-dependent pterin aldehyde reductase [Vitis vinifera]                                           | 26.09  | 13.616 | 30.8 | 8  | 11 | 8  | 0.932 | 0.995 | 1.028 | 0.964 | 0.936 | 1.018 | 0.987 | 7.60E-01 |
|                                                  | PREDICT                                                                                              |        |        |      |    |    |    |       |       |       |       |       |       |       |          |
|                                                  | ED:                                                                                                  |        |        |      |    |    |    |       |       |       |       |       |       |       |          |
| cds.Camellia_sinensis.comp2799_8_c0_seq1_m.15252 | glucose-1-phosphate adenylyltransferase large subunit 3, chloroplastic/amyloplastic [Vitis vinifera] | 57.648 | 216.71 | 40   | 17 | 31 | 16 | 1.034 | 0.982 | 1.011 | 0.996 | 1.023 | 0.977 | 0.99  | 6.36E-01 |
|                                                  | PREDICT                                                                                              |        |        |      |    |    |    |       |       |       |       |       |       |       |          |
|                                                  | ED: S-                                                                                               |        |        |      |    |    |    |       |       |       |       |       |       |       |          |
| cds.Camellia_sinensis.comp2800_2_c0_seq1_m.43612 | adenosylmethionine synthase 5 [Vitis vinifera]                                                       | 16.905 | 8.329  | 33.8 | 5  | 13 | 1  | 1.185 | 1.116 | 1.175 | 0.749 | 0.859 | 0.866 | 0.712 | 2.52E-03 |
|                                                  | PREDICT                                                                                              |        |        |      |    |    |    |       |       |       |       |       |       |       |          |
|                                                  | ED: 1-                                                                                               |        |        |      |    |    |    |       |       |       |       |       |       |       |          |
| cds.Camellia_sinensis.comp2801_1_c0_seq1_m.30896 | aminocyclopropane-1-carboxylate oxidase homolog 1-like [Nelumbo nucifera]                            | 43.315 | 43.911 | 18.7 | 7  | 12 | 7  | 0.984 | 1.005 | 1.044 | 1     | 1.003 | 0.967 | 0.979 | 3.76E-01 |

|                       |                                                                                                                |        |        |      |    |    |   |       |       |       |       |       |       |       |          |
|-----------------------|----------------------------------------------------------------------------------------------------------------|--------|--------|------|----|----|---|-------|-------|-------|-------|-------|-------|-------|----------|
| cds.Camellia_sinensis | PREDICT<br>ED: 2-alkenal reductase (NADP(+)-dependent) isoform X2<br>[Sesamum indicum]                         | 15.401 | 3.0054 | 19   | 2  | 3  | 1 | 0.917 | 1.047 | 0.97  | 1.119 | 0.962 | 1.011 | 1.054 | 4.27E-01 |
| cds.Camellia_sinensis | PREDICT<br>ED: remorin [Cucumis melo]                                                                          | 18.086 | 53.093 | 39.9 | 10 | 18 | 9 | 0.93  | 0.915 | 0.938 | 1.075 | 1.098 | 1.099 | 1.176 | 9.69E-05 |
| cds.Camellia_sinensis | PREDICT<br>ED: 5-methyltetrahydropteroyltriglutamate--homocysteine methyltransferase-like<br>[Malus domestica] | 13.603 | 1.6773 | 13.9 | 2  | 6  | 1 | 1.014 | 0.982 | 0.958 | 0.978 | 1.035 | 1.018 | 1.026 | 3.36E-01 |

|                                |                                                                                                                                                                                                                       |        |        |      |    |    |    |       |       |       |       |       |       |       |          |
|--------------------------------|-----------------------------------------------------------------------------------------------------------------------------------------------------------------------------------------------------------------------|--------|--------|------|----|----|----|-------|-------|-------|-------|-------|-------|-------|----------|
|                                | PREDICT<br>ED:<br>probable<br>L-<br>ascorbate<br>peroxidase<br>6,<br>chloroplast<br>ic isoform<br>X1<br>[Ipomoea<br>nil]<br>enoyl-CoA<br>hydratase/i<br>somerase<br>family<br>protein<br>[Populus<br>trichocarpa<br>] |        |        |      |    |    |    |       |       |       |       |       |       |       |          |
| cds.Camellia_sinensis.comp2802 | 7_c0_seq2_m.24842                                                                                                                                                                                                     | 46.949 | 227.17 | 54.2 | 22 | 70 | 22 | 1.031 | 1.005 | 1.005 | 0.954 | 0.995 | 0.983 | 0.964 | 7.29E-02 |
| cds.Camellia_sinensis.comp2803 | 0_c0_seq1_m.24237                                                                                                                                                                                                     | 50.105 | 27.293 | 12.9 | 6  | 8  | 6  | 1.425 | 1.421 | 1.381 | 0.502 | 0.508 | 0.547 | 0.368 | 2.02E-06 |
|                                | PREDICT<br>ED:<br>NADP-<br>dependent<br>D-sorbitol-<br>6-<br>phosphate<br>dehydroge<br>nase<br>[Ricinus<br>communis]                                                                                                  |        |        |      |    |    |    |       |       |       |       |       |       |       |          |
| cds.Camellia_sinensis.comp2803 | 2_c0_seq1_m.26675                                                                                                                                                                                                     | 38.055 | 20.426 | 22.1 | 8  | 11 | 8  | 0.991 | 0.996 | 0.971 | 1.021 | 1.012 | 1.04  | 1.039 | 2.70E-02 |



|                                                  |                                                                  |        |        |      |   |    |   |       |       |       |       |       |       |       |          |
|--------------------------------------------------|------------------------------------------------------------------|--------|--------|------|---|----|---|-------|-------|-------|-------|-------|-------|-------|----------|
|                                                  | PREDICT                                                          |        |        |      |   |    |   |       |       |       |       |       |       |       |          |
|                                                  | ED: AT-rich                                                      |        |        |      |   |    |   |       |       |       |       |       |       |       |          |
| cds.Camellia_sinensis.comp2804_3_c0_seq1_m.15070 | interactive domain-containing protein 5 isoform X1 [Ipomoea nil] | 50.837 | 4.2775 | 5.3  | 3 | 3  | 2 | 1.006 | 0.98  | 1.047 | 0.927 | 1.038 | 1.006 | 0.98  | 6.11E-01 |
|                                                  | PREDICT                                                          |        |        |      |   |    |   |       |       |       |       |       |       |       |          |
| cds.Camellia_sinensis.comp2804_7_c0_seq1_m.35838 | ED: GTP-binding protein YPTM2 [Populus euphratica]               | 22.733 | 104.91 | 56.2 | 9 | 17 | 3 | 0.943 | 0.99  | 0.975 | 1.066 | 0.993 | 1.075 | 1.078 | 6.21E-02 |
|                                                  | PREDICT                                                          |        |        |      |   |    |   |       |       |       |       |       |       |       |          |
| cds.Camellia_sinensis.comp2804_7_c0_seq2_m.37543 | ED: GTP-binding protein YPTM2 [Populus euphratica]               | 22.663 | 7.9338 | 48.3 | 8 | 15 | 2 | 0.955 | 0.985 | 0.974 | 0.971 | 1.047 | 1.083 | 1.064 | 1.42E-01 |
|                                                  | PREDICT                                                          |        |        |      |   |    |   |       |       |       |       |       |       |       |          |
| cds.Camellia_sinensis.comp2804_7_c0_seq3_m.38110 | ED: GTP-binding protein YPTM2 [Theobroma cacao]                  | 22.397 | 11.844 | 43.8 | 7 | 14 | 3 | 0.938 | 0.968 | 0.9   | 1.076 | 1.059 | 1.049 | 1.135 | 4.78E-03 |
|                                                  | PREDICT                                                          |        |        |      |   |    |   |       |       |       |       |       |       |       |          |
| cds.Camellia_sinensis.comp2805_2_c0_seq1_m.12818 | ED: quinolinate synthase, chloroplastic [Juglans regia]          | 77.597 | 4.4983 | 3.7  | 3 | 3  | 3 | 0.913 | 0.927 | 0.991 | 1.034 | 1.107 | 1.103 | 1.146 | 1.53E-02 |



|                                |                                                                                   |        |        |      |   |    |   |       |       |       |       |       |       |       |          |
|--------------------------------|-----------------------------------------------------------------------------------|--------|--------|------|---|----|---|-------|-------|-------|-------|-------|-------|-------|----------|
| cds.Camellia_sinensis.comp2808 | PREDICT<br>ED: 60S<br>ribosomal protein L11<br>[Ricinus communis]                 | 21.368 | 16.851 | 21.3 | 4 | 10 | 1 | 1.144 | 1.1   | 1.132 | 0.835 | 0.894 | 0.859 | 0.767 | 3.20E-04 |
| cds.Camellia_sinensis.comp2808 | PREDICT<br>ED: 60S<br>ribosomal protein L11<br>[Amborella trichopoda]             | 24.404 | 20.326 | 22.3 | 5 | 11 | 2 | 1.092 | 1.04  | 1.128 | 0.873 | 0.929 | 0.894 | 0.827 | 3.10E-03 |
| cds.Camellia_sinensis.comp2810 | PREDICT<br>ED:<br>probable thiol methyltransferase 2 isoform X3 [Citrus sinensis] | 27.905 | 8.3268 | 12.1 | 2 | 2  | 2 |       |       |       |       |       |       |       |          |
| cds.Camellia_sinensis.comp2810 | PREDICT<br>ED: 60S<br>ribosomal protein L21-1<br>[Daucus carota subsp. sativus]   | 18.716 | 16.424 | 30.5 | 6 | 12 | 6 | 1.198 | 1.207 | 1.205 | 0.774 | 0.798 | 0.807 | 0.659 | 2.54E-06 |
| cds.Camellia_sinensis.comp2811 | PREDICT<br>ED:<br>thioredoxin H-type<br>[Prunus mume]                             | 13.804 | 19.626 | 52.8 | 7 | 20 | 6 | 1.015 | 1.01  | 0.92  | 1.077 | 0.999 | 1.022 | 1.052 | 2.59E-01 |

|                                                  |                                                                                                               |        |        |     |   |    |   |       |       |       |       |       |       |       |          |
|--------------------------------------------------|---------------------------------------------------------------------------------------------------------------|--------|--------|-----|---|----|---|-------|-------|-------|-------|-------|-------|-------|----------|
| cds.Camellia_sinensis.comp2812_2_c0_seq1_m.8123  | PREDICTED: G-type lectin S-receptor-like serine/threonine-protein kinase RLK1 isoform X2 [Populus euphratica] | 91.731 | 4.2612 | 2.8 | 2 | 2  | 2 |       |       |       |       |       |       |       |          |
| cds.Camellia_sinensis.comp2812_3_c0_seq1_m.42227 | PREDICTED: glycine-rich RNA-binding protein GRP1A-like [Nelumbo nucifera]                                     | 16.786 | 140.3  | 50  | 7 | 26 | 5 | 1.047 | 1.04  | 1.041 | 0.955 | 0.958 | 0.965 | 0.92  | 2.19E-05 |
| cds.Camellia_sinensis.comp2813_1_c0_seq1_m.18968 | PREDICTED: riboflavin biosynthesis protein PYRR, chloroplastic isoform X2 [Vitis vinifera]                    | 64.245 | 5.2259 | 3.2 | 3 | 3  | 3 | 0.963 | 1.013 | 0.995 | 1.006 | 1.026 | 1.012 | 1.025 | 1.99E-01 |

|                                                 |                                                                                                                                                                                                                                                                                                                                                                                                                      |        |        |      |    |    |    |       |       |       |       |       |       |       |          |
|-------------------------------------------------|----------------------------------------------------------------------------------------------------------------------------------------------------------------------------------------------------------------------------------------------------------------------------------------------------------------------------------------------------------------------------------------------------------------------|--------|--------|------|----|----|----|-------|-------|-------|-------|-------|-------|-------|----------|
|                                                 | PREDICT<br>ED: ABC                                                                                                                                                                                                                                                                                                                                                                                                   |        |        |      |    |    |    |       |       |       |       |       |       |       |          |
| cds.Camellia_sinensis.comp28134_c0_seq1_m.30420 | transporter<br>I family<br>member<br>19<br>[Daucus<br>carota<br>subsp.<br>PREDICT<br>ED:<br>protein<br>EMBRYO<br>SAC<br>DEVELOPMENT<br>ARREST<br>3,<br>chloroplast<br>ic [Citrus<br>sinensis]<br>PREDICT<br>ED: trans-<br>cinnamate<br>4-<br>monooxygenase<br>[Jatropha<br>curcas]<br>PREDICT<br>ED:<br>pentatricop<br>eptide<br>repeat-<br>containing<br>protein<br>At1g1262<br>0-like<br>[Nicotiana<br>sylvestris] | 33.344 | 3.7229 | 7.1  | 2  | 2  | 2  | 0.951 | 1.029 | 0.929 | 1.097 | 1.068 | 0.953 | 1.072 | 2.66E-01 |
| cds.Camellia_sinensis.comp28139_c0_seq1_m.39401 | EMBRYO<br>SAC<br>DEVELOPMENT<br>ARREST<br>3,<br>chloroplast<br>ic [Citrus<br>sinensis]<br>PREDICT<br>ED: trans-<br>cinnamate<br>4-<br>monooxygenase<br>[Jatropha<br>curcas]<br>PREDICT<br>ED:<br>pentatricop<br>eptide<br>repeat-<br>containing<br>protein<br>At1g1262<br>0-like<br>[Nicotiana<br>sylvestris]                                                                                                        | 23.422 | 1.2262 | 7    | 1  | 1  | 1  |       |       |       |       |       |       |       |          |
| cds.Camellia_sinensis.comp28142_c0_seq1_m.18076 | EMBRYO<br>SAC<br>DEVELOPMENT<br>ARREST<br>3,<br>chloroplast<br>ic [Citrus<br>sinensis]<br>PREDICT<br>ED: trans-<br>cinnamate<br>4-<br>monooxygenase<br>[Jatropha<br>curcas]<br>PREDICT<br>ED:<br>pentatricop<br>eptide<br>repeat-<br>containing<br>protein<br>At1g1262<br>0-like<br>[Nicotiana<br>sylvestris]                                                                                                        | 60.624 | 61.458 | 26.1 | 13 | 20 | 13 | 1.245 | 1.257 | 1.245 | 0.711 | 0.741 | 0.714 | 0.578 | 1.10E-06 |
| cds.Camellia_sinensis.comp28153_c0_seq1_m.44111 | EMBRYO<br>SAC<br>DEVELOPMENT<br>ARREST<br>3,<br>chloroplast<br>ic [Citrus<br>sinensis]<br>PREDICT<br>ED: trans-<br>cinnamate<br>4-<br>monooxygenase<br>[Jatropha<br>curcas]<br>PREDICT<br>ED:<br>pentatricop<br>eptide<br>repeat-<br>containing<br>protein<br>At1g1262<br>0-like<br>[Nicotiana<br>sylvestris]                                                                                                        | 23.375 | -2     | 4.8  | 1  | 2  | 1  | 0.954 | 0.927 | 0.958 | 1.061 | 1.099 | 1.03  | 1.124 | 5.56E-03 |



|                                                 |                                                                                                     |        |        |      |    |    |    |       |       |       |       |       |       |       |          |
|-------------------------------------------------|-----------------------------------------------------------------------------------------------------|--------|--------|------|----|----|----|-------|-------|-------|-------|-------|-------|-------|----------|
| cds.Camellia_sinensis.comp28158_c0_seq1_m.21407 | PREDICT<br>ED:<br>isoaspartyl<br>peptidase/<br>L-<br>asparagina<br>se 1 [Vitis<br>vinifera]         | 34.597 | 58.738 | 20.8 | 6  | 9  | 6  | 1.004 | 0.963 | 0.982 | 1.035 | 0.984 | 1.035 | 1.036 | 1.68E-01 |
| cds.Camellia_sinensis.comp28166_c0_seq1_m.24152 | PREDICT<br>ED:<br>calreticul<br>in-3-like<br>[Populus<br>euphratica]                                | 46.459 | 17.718 | 21.8 | 8  | 12 | 6  | 1.056 | 1.083 | 1.075 | 0.921 | 0.906 | 0.896 | 0.847 | 1.16E-04 |
| cds.Camellia_sinensis.comp28167_c0_seq1_m.27410 | PREDICT<br>ED:<br>patatin-<br>like<br>protein 2<br>[Vitis<br>vinifera]                              | 45.447 | 55.067 | 23.2 | 10 | 10 | 10 | 0.961 | 0.99  | 0.97  | 1.076 | 1.017 | 1.005 | 1.061 | 6.25E-02 |
| cds.Camellia_sinensis.comp28168_c1_seq6_m.40232 | PREDICT<br>ED:<br>ubiquitin-<br>conjugatin<br>g enzyme<br>E2 10-like<br>[Gossypiu<br>m<br>hirsutum] | 16.547 | 10.366 | 12.8 | 2  | 3  | 2  | 1.071 | 0.995 | 1.056 | 0.914 | 0.981 | 0.955 | 0.913 | 4.07E-02 |
| cds.Camellia_sinensis.comp28169_c0_seq1_m.38581 | PREDICT<br>ED: 60S<br>ribosomal<br>protein<br>L13-1<br>[Nelumbo<br>nucifera]                        | 23.908 | 22.169 | 23.7 | 5  | 8  | 5  | 1.136 | 1.116 | 1.11  | 0.855 | 0.887 | 0.865 | 0.775 | 3.95E-05 |

|                                                  |                                                                                                                                          |        |        |      |   |   |   |       |       |       |       |       |       |       |          |
|--------------------------------------------------|------------------------------------------------------------------------------------------------------------------------------------------|--------|--------|------|---|---|---|-------|-------|-------|-------|-------|-------|-------|----------|
|                                                  | PREDICT<br>ED:<br>hepatocyte<br>growth<br>factor-<br>regulated<br>tyrosine<br>kinase<br>substrate<br>isoform<br>X3<br>[Juglans<br>regia] |        |        |      |   |   |   |       |       |       |       |       |       |       |          |
| cds.Camellia_sinensis.comp2817_8_c0_seq1_m.24102 |                                                                                                                                          | 32.126 | 7.1292 | 10.6 | 2 | 2 | 2 |       |       |       |       |       |       |       |          |
|                                                  | PREDICT<br>ED:<br>DEAD-<br>box ATP-<br>dependent<br>RNA<br>helicase 53<br>[Vitis<br>vinifera]                                            |        |        |      |   |   |   |       |       |       |       |       |       |       |          |
| cds.Camellia_sinensis.comp2818_1_c0_seq1_m.12362 |                                                                                                                                          | 41.29  | 6.3789 | 12.3 | 4 | 5 | 4 | 0.843 | 0.938 | 0.859 | 1.169 | 1.101 | 1.145 | 1.294 | 2.28E-03 |
|                                                  | PREDICT<br>ED:<br>DEAD-<br>box ATP-<br>dependent<br>RNA<br>helicase<br>53-like<br>[Citrus<br>sinensis]                                   |        |        |      |   |   |   |       |       |       |       |       |       |       |          |
| cds.Camellia_sinensis.comp2818_1_c0_seq1_m.12363 |                                                                                                                                          | 28.392 | 8.1285 | 12.5 | 3 | 3 | 3 | 0.923 | 0.933 | 0.959 | 1.056 | 1.054 | 1.105 | 1.142 | 2.30E-03 |



|                                |                                                                           |        |        |      |    |    |    |       |       |       |       |       |       |       |          |
|--------------------------------|---------------------------------------------------------------------------|--------|--------|------|----|----|----|-------|-------|-------|-------|-------|-------|-------|----------|
| cds.Camellia_sinensis.comp2820 | PREDICTED: delta-1-pyrroline-5-carboxylate synthase [Sesamum indicum]     | 78.684 | 19.134 | 12.9 | 10 | 13 | 10 | 0.982 | 1.024 | 1.008 | 0.998 | 0.998 | 1.038 | 1.007 | 7.32E-01 |
| cds.Camellia_sinensis.comp2821 | PREDICTED: heterogeneous nuclear ribonucleoprotein 1-like [Juglans regia] | 47.577 | 138.5  | 13.7 | 5  | 16 | 4  | 1.001 | 0.983 | 0.975 | 1.012 | 0.997 | 1.019 | 1.023 | 8.44E-02 |
| cds.Camellia_sinensis.comp2821 | glycoprotein in family [Medicago truncatula]                              | 28.787 | 8.2185 | 8.2  | 2  | 3  | 2  | 0.997 | 1.008 | 0.987 | 1.051 | 0.932 | 1.028 | 1.006 | 9.00E-01 |
| cds.Camellia_sinensis.comp2821 | glycoprotein in family [Medicago truncatula]                              | 32.255 | 5.1714 | 5.9  | 2  | 2  | 2  | 1.096 | 1.088 | 1.054 | 0.901 | 0.957 | 0.885 | 0.847 | 3.30E-03 |
| cds.Camellia_sinensis.comp2822 | PREDICTED: glutathione reductase, cytosolic isoform X1 [Vitis vinifera]   | 53.876 | 138.97 | 40.8 | 18 | 30 | 18 | 0.964 | 0.94  | 0.979 | 1.082 | 1.046 | 1.058 | 1.105 | 2.94E-03 |





|                                                                                                    |                   |        |        |      |   |   |   |       |       |       |       |       |       |       |          |
|----------------------------------------------------------------------------------------------------|-------------------|--------|--------|------|---|---|---|-------|-------|-------|-------|-------|-------|-------|----------|
| cds.Camellia_sinensis.comp2824                                                                     | 4_c0_seq1_m.32818 |        |        |      |   |   |   |       |       |       |       |       |       |       |          |
| PREDICTED:<br>NADH dehydrogenase<br>[ubiquinone]                                                   |                   | 28.356 | 7.0782 | 16.5 | 4 | 7 | 4 | 1.006 | 0.944 | 1.041 | 0.97  | 0.988 | 1.005 | 0.991 | 7.89E-01 |
| cds.Camellia_sinensis.comp2824                                                                     | 7_c0_seq1_m.14164 |        |        |      |   |   |   |       |       |       |       |       |       |       |          |
| flavoprotein 2,<br>mitochondrial<br>[Sesamum indicum]                                              |                   | 54.209 | 3.5653 | 4.2  | 2 | 2 | 2 | 1.032 | 1.094 | 1.129 | 0.89  | 0.922 | 0.918 | 0.839 | 3.58E-03 |
| GTPase Era<br>[Morus notabilis]                                                                    |                   |        |        |      |   |   |   |       |       |       |       |       |       |       |          |
| cds.Camellia_sinensis.comp2825                                                                     | 2_c0_seq1_m.26270 |        |        |      |   |   |   |       |       |       |       |       |       |       |          |
| PREDICTED:<br>protein SLOW GREEN 1,<br>chloroplastic-like<br>[Nicotiana attenuata]                 |                   | 40.33  | 17.016 | 6.8  | 3 | 6 | 3 | 1.009 | 0.953 | 0.969 | 1.007 | 1.058 | 1.036 | 1.058 | 6.37E-02 |
| cds.Camellia_sinensis.comp2825                                                                     | 5_c0_seq1_m.3638  |        |        |      |   |   |   |       |       |       |       |       |       |       |          |
| PREDICTED:<br>mitochondrial<br>arginine transporter<br>BAC2-like isoform X1<br>[Nicotiana tabacum] |                   | 41.072 | 1.1869 | 1.9  | 1 | 1 | 1 | 0.951 | 0.977 | 0.985 | 1.023 | 1.039 | 1.045 | 1.067 | 6.44E-03 |

|                                                  |                                                                                            |        |        |     |   |   |   |       |       |       |       |       |       |       |          |
|--------------------------------------------------|--------------------------------------------------------------------------------------------|--------|--------|-----|---|---|---|-------|-------|-------|-------|-------|-------|-------|----------|
|                                                  | PREDICT<br>ED:<br>probable<br>endo-                                                        |        |        |     |   |   |   |       |       |       |       |       |       |       |          |
| cds.Camellia_sinensis.comp2825_6_c0_seq2_m.21404 | 1,3(4)-beta-glucanase ARB_014_44<br>[Daucus carota subsp. sativus]                         | 64.753 | 15.364 | 9.6 | 5 | 5 | 5 | 0.902 | 0.927 | 0.884 | 1.091 | 1.085 | 1.077 | 1.199 | 2.19E-04 |
|                                                  | PREDICT<br>ED:<br>calmodulin-binding transcription activator 6 isoform X1 [Vitis vinifera] |        |        |     |   |   |   |       |       |       |       |       |       |       |          |
| cds.Camellia_sinensis.comp2827_4_c0_seq1_m.4439  | calmodulin-binding transcription activator 6 isoform X1 [Vitis vinifera]                   | 106.06 | 6.616  | 3.7 | 4 | 4 | 4 | 1.135 | 1.067 | 1.102 | 0.877 | 0.877 | 0.9   | 0.803 | 3.81E-04 |
|                                                  | PREDICT<br>ED:<br>EKC/KEOPS complex subunit bud32 [Juglans regia]                          |        |        |     |   |   |   |       |       |       |       |       |       |       |          |
| cds.Camellia_sinensis.comp2827_8_c0_seq1_m.37133 | EKC/KEOPS complex subunit bud32 [Juglans regia]                                            | 29.411 | 6.4551 | 8.8 | 2 | 2 | 2 | 1.085 | 0.992 | 1.13  | 0.94  | 0.888 | 0.951 | 0.867 | 3.17E-02 |

|                                                 |                                                                                          |        |        |      |    |    |    |       |       |       |       |       |       |       |          |
|-------------------------------------------------|------------------------------------------------------------------------------------------|--------|--------|------|----|----|----|-------|-------|-------|-------|-------|-------|-------|----------|
| cds.Camellia_sinensis.comp28287_c0_seq1_m.16003 | PREDICTED:<br>methionine--tRNA ligase, chloroplastic/mitochondrial [Vitis vinifera]      | 69.586 | 55.997 | 15.6 | 8  | 9  | 8  | 1.038 | 0.993 | 0.975 | 0.998 | 0.996 | 0.986 | 0.991 | 6.82E-01 |
| cds.Camellia_sinensis.comp28290_c0_seq1_m.27632 | PREDICTED:<br>ribokinase isoform X1 [Theobroma cacao]                                    | 42.09  | 3.4232 | 7.5  | 4  | 4  | 4  | 0.993 | 1.001 | 0.984 | 0.99  | 1.015 | 1     | 1.009 | 3.63E-01 |
| cds.Camellia_sinensis.comp28292_c0_seq3_m.27179 | PREDICTED:<br>thylakoid lumenal protein TL20.3, chloroplastic isoform X1 [Juglans regia] | 30.293 | 275.84 | 57.6 | 13 | 30 | 13 | 0.994 | 0.999 | 1.002 | 0.975 | 1.008 | 0.998 | 0.995 | 6.62E-01 |
| cds.Camellia_sinensis.comp28297_c0_seq1_m.31083 | NAD(P)-binding rossmann-fold protein [Medicago truncatula]                               | 39.069 | 74.143 | 46.1 | 15 | 37 | 6  | 0.979 | 0.998 | 0.967 | 1.033 | 1.025 | 1.017 | 1.044 | 1.30E-02 |

|                                                 |                                                                                                                              |        |        |      |    |    |    |       |       |       |       |       |       |       |          |
|-------------------------------------------------|------------------------------------------------------------------------------------------------------------------------------|--------|--------|------|----|----|----|-------|-------|-------|-------|-------|-------|-------|----------|
| cds.Camellia_sinensis.comp28297_c0_seq2_m.34773 | NAD-dependent epimerase/dehydratase [Zea mays]<br>PREDICTED: 50S ribosomal protein L4, chloroplastic-like [Nelumbo nucifera] | 27.944 | 158.94 | 61.2 | 15 | 31 | 6  | 1.066 | 1.011 | 1.038 | 0.926 | 0.966 | 0.958 | 0.915 | 1.14E-02 |
| cds.Camellia_sinensis.comp28300_c0_seq1_m.40644 | ED: 50S ribosomal protein L4, chloroplastic-like [Nelumbo nucifera]<br>PREDICTED:                                            | 33.539 | 11.727 | 9.6  | 3  | 4  | 3  | 0.933 | 0.915 | 0.94  | 1.059 | 1.119 | 1.098 | 1.175 | 8.76E-04 |
| cds.Camellia_sinensis.comp28302_c1_seq1_m.15926 | ED: TOM1-like protein 2 [Vitis vinifera]<br>PREDICTED:                                                                       | 67.699 | 11.354 | 2.3  | 1  | 1  | 1  | 0.989 | 0.851 | 0.992 | 1.127 | 1.115 | 0.959 | 1.13  | 1.67E-01 |
| cds.Camellia_sinensis.comp28303_c2_seq1_m.19063 | ED: cytochrome P450 704C1 [Theobroma cacao]<br>PREDICTED:                                                                    | 57.329 | 168.42 | 47.5 | 22 | 40 | 22 | 1.066 | 1.008 | 1.02  | 0.966 | 0.967 | 0.963 | 0.936 | 6.11E-02 |
| cds.Camellia_sinensis.comp28305_c0_seq1_m.37395 | ED: ras-related protein RABH1b-like [Nicotiana tabacum]                                                                      | 22.998 | 38.405 | 32.4 | 7  | 12 | 4  | 1.08  | 1.013 | 1.027 | 1.025 | 0.878 | 0.971 | 0.921 | 1.65E-01 |

|                                                  |                                                                               |        |        |      |    |    |   |       |       |       |       |       |       |       |          |
|--------------------------------------------------|-------------------------------------------------------------------------------|--------|--------|------|----|----|---|-------|-------|-------|-------|-------|-------|-------|----------|
| cds.Camellia_sinensis.comp2831_2_c0_seq2_m.16725 | PREDICT<br>ED: 40S<br>ribosomal protein S15a<br>[Erythraea guttata]           | 14.787 | 10.525 | 25.4 | 4  | 8  | 4 | 0.97  | 0.953 | 0.976 | 1.031 | 1.086 | 1.031 | 1.086 | 1.18E-02 |
| cds.Camellia_sinensis.comp2831_3_c0_seq2_m.21555 | PREDICT<br>ED: DNA polymerase I isoform X1<br>[Theobroma cacao]<br>BAG family | 47.596 | 8.8056 | 4    | 1  | 1  | 1 | 1.041 | 0.921 | 1.024 | 1.087 | 0.969 | 0.97  | 1.013 | 8.18E-01 |
| cds.Camellia_sinensis.comp2831_4_c0_seq2_m.31619 | molecular chaperone regulator 4<br>[Asparagus officinalis]                    | 41.296 | 5.1013 | 5.4  | 2  | 2  | 2 |       |       |       |       |       |       |       |          |
| cds.Camellia_sinensis.comp2832_9_c0_seq1_m.34253 | PREDICT<br>ED: 40S<br>ribosomal protein S3-3-like<br>[Nelumbo nucifera]       | 26.352 | 72.336 | 56.6 | 13 | 25 | 6 | 0.944 | 0.937 | 0.953 | 1.033 | 1.005 | 1.048 | 1.089 | 3.00E-03 |
| cds.Camellia_sinensis.comp2833_3_c0_seq1_m.25292 | PREDICT<br>ED:<br>alcohol dehydrogenase-like 1<br>[Sesamum indicum]           | 50.616 | 64.179 | 20.3 | 7  | 9  | 7 | 0.958 | 1.007 | 1.002 | 1.107 | 1.009 | 0.977 | 1.042 | 3.76E-01 |





|                                                 |                                                                                 |        |        |      |    |    |    |       |       |       |       |       |       |       |          |
|-------------------------------------------------|---------------------------------------------------------------------------------|--------|--------|------|----|----|----|-------|-------|-------|-------|-------|-------|-------|----------|
| cds.Camellia_sinensis.comp28357_c1_seq1_m.51060 | PREDICTED:<br>cinnamoyl-CoA reductase 1-like isoform X2<br>[Populus euphratica] | 19.709 | 3.2853 | 12.8 | 3  | 4  | 3  | 0.894 | 1.041 | 1.023 | 1.006 | 1.033 | 1.031 | 1.038 | 4.65E-01 |
| cds.Camellia_sinensis.comp28358_c0_seq1_m.9158  | PREDICTED:<br>subtilisin-like protease SBT1.9<br>[Vitis vinifera]               | 84.728 | 2.3926 | 4.1  | 3  | 3  | 3  | 1.102 | 1.052 | 1.049 | 0.92  | 0.928 | 0.931 | 0.868 | 9.79E-04 |
| cds.Camellia_sinensis.comp28359_c0_seq1_m.6188  | PREDICTED:<br>protein PLASTID MOVEMENT IMPAIRED 1<br>[Theobroma cacao]          | 95.151 | 88.673 | 19.6 | 16 | 21 | 16 | 1.13  | 1.122 | 1.143 | 0.854 | 0.868 | 0.852 | 0.758 | 2.04E-06 |
| cds.Camellia_sinensis.comp28362_c0_seq1_m.34005 | DUF2358 family protein<br>[Medicago truncatula]                                 | 34.304 | 33.242 | 7.3  | 3  | 4  | 3  | 0.937 | 1     | 0.933 | 1.067 | 1.016 | 1.038 | 1.087 | 3.38E-02 |
| cds.Camellia_sinensis.comp28364_c1_seq2_m.35218 | PREDICTED: 40S ribosomal protein S5<br>[Vitis vinifera]                         | 23.957 | 57.408 | 33.5 | 8  | 18 | 8  | 0.972 | 0.98  | 0.977 | 1.059 | 1.039 | 1.037 | 1.07  | 6.76E-04 |



|                       |                                                                  |        |        |      |   |    |   |       |       |       |       |       |       |       |          |
|-----------------------|------------------------------------------------------------------|--------|--------|------|---|----|---|-------|-------|-------|-------|-------|-------|-------|----------|
|                       | PREDICT<br>ED:<br>ubiquitin<br>fusion                            |        |        |      |   |    |   |       |       |       |       |       |       |       |          |
| cds.Camellia_sinensis | degradation protein 1 homolog isoform X2<br>[Populus euphratica] | 35.788 | 61.348 | 26.4 | 8 | 10 | 7 | 1.012 | 1.062 | 1.095 | 0.926 | 0.928 | 0.941 | 0.882 | 5.98E-03 |
|                       | PREDICT<br>ED: PTI1-like                                         |        |        |      |   |    |   |       |       |       |       |       |       |       |          |
| cds.Camellia_sinensis | tyrosine-protein kinase 1<br>[Juglans regia]                     | 27.048 | 14.318 | 19.3 | 4 | 6  | 3 | 0.941 | 0.988 | 1.007 | 1.085 | 1.02  | 1.005 | 1.059 | 1.37E-01 |
|                       | PREDICT<br>ED: protein kinase Pti1<br>[Glycine max]              |        |        |      |   |    |   |       |       |       |       |       |       |       |          |
| cds.Camellia_sinensis | kinase Pti1<br>[Glycine max]                                     | 11.218 | 2.3462 | 8.1  | 1 | 1  | 1 | 1.02  | 0.987 | 0.954 | 0.902 | 1.062 | 1.079 | 1.028 | 7.06E-01 |
|                       | PREDICT<br>ED:                                                   |        |        |      |   |    |   |       |       |       |       |       |       |       |          |
| cds.Camellia_sinensis | transmembrane 9 superfamily member 9-like<br>[Ziziphus jujuba]   | 73.938 | 11.401 | 5.8  | 3 | 3  | 3 | 1.03  | 1.051 | 1.075 | 0.891 | 0.973 | 0.972 | 0.899 | 2.74E-02 |

|                                                  |                                                                                                                                                                     |        |        |      |    |    |    |       |       |       |       |       |       |       |          |
|--------------------------------------------------|---------------------------------------------------------------------------------------------------------------------------------------------------------------------|--------|--------|------|----|----|----|-------|-------|-------|-------|-------|-------|-------|----------|
| cds.Camellia_sinensis.comp2841_7_c0_seq1_m.22464 | PREDICTED:<br>glyceraldehyde-3-phosphate dehydrogenase, cytosolic [Eucalyptus grandis] glyceraldehyde-3-phosphate dehydrogenase, cytosolic [Pyrus x bretschneideri] | 20.841 | 56.776 | 60   | 9  | 42 | 3  | 1.036 | 1.006 | 0.954 | 0.982 | 1.021 | 1.02  | 1.009 | 7.48E-01 |
| cds.Camellia_sinensis.comp2841_7_c0_seq1_m.22467 | PREDICTED: 1,2-dihydroxy-3-keto-5-methylthiopentenedioxygenase 2 [Nicotiana tabacum]                                                                                | 11.603 | 156.3  | 89.5 | 9  | 58 | 8  | 0.984 | 0.938 | 0.951 | 1.033 | 1.06  | 1.043 | 1.092 | 5.50E-03 |
| cds.Camellia_sinensis.comp2841_9_c0_seq1_m.38820 | PREDICTED: heat shock cognate protein 80 [Ziziphus jujuba]                                                                                                          | 23.712 | 14.581 | 29.4 | 6  | 7  | 5  | 0.919 | 0.955 | 1.043 | 1.058 | 1.026 | 1.026 | 1.066 | 1.68E-01 |
| cds.Camellia_sinensis.comp2842_5_c0_seq1_m.10099 |                                                                                                                                                                     | 62.23  | 267.5  | 45.3 | 27 | 68 | 14 | 1.112 | 1.084 | 1.104 | 0.873 | 0.881 | 0.899 | 0.804 | 4.29E-05 |





|                                                  |                                                                                         |        |        |      |    |    |    |       |       |       |       |       |       |       |          |
|--------------------------------------------------|-----------------------------------------------------------------------------------------|--------|--------|------|----|----|----|-------|-------|-------|-------|-------|-------|-------|----------|
| cds.Camellia_sinensis.comp2845_8_c0_seq2_m.12232 | PREDICTED: CBS domain-containing protein CBSCBSP B3-like isoform X1 [Nicotiana tabacum] | 58.901 | 64.476 | 29.4 | 11 | 12 | 11 | 0.988 | 1.043 | 0.99  | 0.989 | 0.963 | 0.995 | 0.976 | 2.94E-01 |
| cds.Camellia_sinensis.comp2847_3_c0_seq1_m.35295 | PREDICTED: probable 2-carboxy-D-arabinitol-1-phosphatase [Juglans regia]                | 21.804 | 24.328 | 25.5 | 4  | 8  | 4  | 1.056 | 1.053 | 1.086 | 0.963 | 0.928 | 0.899 | 0.873 | 3.60E-03 |
| cds.Camellia_sinensis.comp2847_3_c0_seq1_m.35296 | PREDICTED: probable 2-carboxy-D-arabinitol-1-phosphatase isoform X2 [Ricinus communis]  | 13.993 | 18.762 | 29.2 | 3  | 3  | 3  | 1.08  | 1.032 | 1.052 | 0.918 | 0.97  | 0.944 | 0.895 | 5.80E-03 |



|                                |                                                                             |        |        |      |   |    |   |       |       |       |       |       |       |       |          |
|--------------------------------|-----------------------------------------------------------------------------|--------|--------|------|---|----|---|-------|-------|-------|-------|-------|-------|-------|----------|
| cds.Camellia_sinensis.comp2848 | PREDICT<br>ED: cell division cycle protein 48 homolog<br>[Arachis ipaensis] | 23.78  | 1.1683 | 23   | 5 | 11 | 1 | 1.08  | 1.03  | 1.084 | 0.9   | 0.936 | 0.955 | 0.874 | 4.90E-03 |
| cds.Camellia_sinensis.comp2848 | PREDICT<br>ED: protein TRANSPARENT TESTA GLABRA 1-like<br>[Ziziphus jujuba] | 38.348 | 5.152  | 6.7  | 2 | 2  | 2 | 0.993 | 1.081 | 1.065 | 1.08  | 0.875 | 0.913 | 0.914 | 2.48E-01 |
| cds.Camellia_sinensis.comp2849 | PREDICT<br>ED: VAMP-like protein YKT61<br>[Ricinus communis]                | 22.666 | 9.3791 | 29.1 | 6 | 6  | 6 | 0.949 | 0.98  | 1.017 | 1.037 | 1.069 | 0.985 | 1.049 | 1.99E-01 |
| cds.Camellia_sinensis.comp2849 | PREDICT<br>ED: thioredoxin-like 3-1, chloroplastic<br>[Theobroma cacao]     | 22.141 | 6.5676 | 21.7 | 5 | 9  | 4 | 0.989 | 1.013 | 0.957 | 1.005 | 1.016 | 1.052 | 1.039 | 1.53E-01 |

|                                |                   |                                                                                             |        |        |      |    |    |   |       |       |       |       |       |       |       |          |
|--------------------------------|-------------------|---------------------------------------------------------------------------------------------|--------|--------|------|----|----|---|-------|-------|-------|-------|-------|-------|-------|----------|
| cds.Camellia_sinensis.comp2850 | 9_c0_seq1_m.24190 | PREDICT<br>ED:<br>methionyl-tRNA<br>formyltransferase<br>[Citrus sinensis]                  | 32.367 | 3.3052 | 7    | 2  | 2  | 2 |       |       |       |       |       |       |       |          |
| cds.Camellia_sinensis.comp2851 | 0_c0_seq1_m.34868 | PREDICT<br>ED: (DL)-glycerol-3-phosphatase 2<br>[Sesamum indicum]                           | 30.507 | 21.586 | 15.9 | 4  | 4  | 4 | 0.998 | 1.001 | 0.966 | 1.005 | 0.999 | 1.03  | 1.023 | 1.93E-01 |
| cds.Camellia_sinensis.comp2851 | 4_c0_seq1_m.2113  | PREDICT<br>ED:<br>topless-related<br>protein 1-like<br>isoform X1<br>[Nicotiana sylvestris] | 122.45 | 20.443 | 10.6 | 11 | 13 | 7 | 0.993 | 0.987 | 1.054 | 1.025 | 0.963 | 0.985 | 0.98  | 5.07E-01 |
| cds.Camellia_sinensis.comp2851 | 6_c0_seq1_m.3672  | PREDICT<br>ED:<br>importin-11 isoform X1 [Vitis vinifera]                                   | 113.24 | 2.8156 | 1.5  | 1  | 1  | 1 | 1.022 | 0.93  | 0.976 | 1.152 | 0.926 | 1.014 | 1.056 | 4.99E-01 |



|                                                 |                                                                                                 |        |        |      |   |    |   |       |       |       |       |       |       |       |          |
|-------------------------------------------------|-------------------------------------------------------------------------------------------------|--------|--------|------|---|----|---|-------|-------|-------|-------|-------|-------|-------|----------|
| cds.Camellia_sinensis.comp28537_c0_seq1_m.11963 | PREDICTED: protein arginine N-methyltransferase 1.5 isoform X1 [Vitis vinifera]                 | 72.557 | 10.893 | 1.7  | 1 | 1  | 1 | 0.923 | 0.998 | 0.95  | 1.004 | 1.025 | 1.123 | 1.098 | 8.81E-02 |
| cds.Camellia_sinensis.comp28540_c0_seq1_m.17423 | PREDICTED: ATP-dependent 6-phosphofructokinase 5, chloroplastic-like isoform X1 [Juglans regia] | 60.305 | 8.6349 | 7.1  | 4 | 5  | 3 | 0.978 | 0.953 | 1.029 | 0.983 | 1.028 | 1.013 | 1.022 | 4.52E-01 |
| cds.Camellia_sinensis.comp28540_c0_seq1_m.17425 |                                                                                                 | 12.923 | -2     | 11.4 | 1 | 1  | 1 | 1.036 | 1.02  | 0.998 | 0.965 | 1.04  | 0.942 | 0.965 | 3.14E-01 |
| cds.Camellia_sinensis.comp28542_c0_seq1_m.42075 | PREDICTED: ras-related protein Rab7 [Capsicum annuum]                                           | 23.056 | 15.717 | 36.1 | 7 | 11 | 5 | 0.914 | 1.015 | 0.952 | 1     | 1.043 | 1.01  | 1.06  | 1.50E-01 |

|                                |                                                                                       |        |        |      |   |    |   |       |       |       |       |       |       |       |          |
|--------------------------------|---------------------------------------------------------------------------------------|--------|--------|------|---|----|---|-------|-------|-------|-------|-------|-------|-------|----------|
| cds.Camellia_sinensis.comp2854 | PREDICT ED: putative acyl-activating enzyme 19 isoform X4 [Pyrus bretschneideri]      | 105.76 | -2     | 1.3  | 1 | 1  | 1 | 0.974 | 1.117 | 0.933 | 0.862 | 1.01  | 1.101 | 0.983 | 8.42E-01 |
| cds.Camellia_sinensis.comp2854 | PREDICT ED: histone H1 [Vitis vinifera]                                               | 25.458 | 13.92  | 18.1 | 4 | 6  | 4 | 1.18  | 1.147 | 1.172 | 0.82  | 0.863 | 0.805 | 0.711 | 1.05E-04 |
| cds.Camellia_sinensis.comp2854 | PREDICT ED: histone H1 [Vitis vinifera]                                               | 16.262 | 36.331 | 32.9 | 7 | 9  | 7 | 1.099 | 1.122 | 1.151 | 0.81  | 0.863 | 0.921 | 0.769 | 2.60E-03 |
| cds.Camellia_sinensis.comp2854 | PREDICT ED: probable NAD(P)H dehydrogenase (quinone) FQR1-like 1 [Eucalyptus grandis] | 15.039 | 3.3033 | 27.9 | 5 | 8  | 1 | 1.024 | 0.974 | 0.934 | 1.048 | 1.038 | 0.996 | 1.051 | 1.78E-01 |
| cds.Camellia_sinensis.comp2855 | PREDICT ED: protoporphyrinogen oxidase 1, chloroplastic [Vitis vinifera]              | 62.148 | 32.276 | 16.5 | 9 | 13 | 9 | 1.027 | 1.068 | 1.033 | 0.931 | 0.958 | 0.935 | 0.903 | 2.48E-03 |



|                                                  |                                                                                                                                                                       |        |        |      |    |    |    |       |       |       |       |       |       |       |          |
|--------------------------------------------------|-----------------------------------------------------------------------------------------------------------------------------------------------------------------------|--------|--------|------|----|----|----|-------|-------|-------|-------|-------|-------|-------|----------|
| cds.Camellia_sinensis.comp2857_1_c0_seq9_m.4622  | PREDICTED:<br>leucine--tRNA ligase, chloroplast<br>ic/mitochondrial isoform X1<br>[Theobroma cacao] 6,7-dimethyl-8-ribityllumazine synthase<br>[Arabidopsis thaliana] | 114.99 | 79.461 | 16.1 | 14 | 23 | 14 | 1.018 | 1.043 | 1.013 | 0.981 | 0.963 | 0.943 | 0.939 | 1.25E-02 |
| cds.Camellia_sinensis.comp2857_2_c0_seq1_m.34652 | PREDICTED:<br>syntaxin-22-like isoform X1<br>[Jatropha curcas]                                                                                                        | 28.521 | 32.367 | 5    | 1  | 1  | 1  | 0.985 | 1.09  | 1.112 | 0.99  | 0.904 | 0.92  | 0.883 | 5.70E-02 |
| cds.Camellia_sinensis.comp2857_4_c0_seq3_m.25434 | PREDICTED:<br>probable inactive receptor kinase<br>At2g26730 [Vitis vinifera]                                                                                         | 30.301 | 6.8029 | 7    | 2  | 4  | 2  | 1.069 | 0.94  | 0.951 | 1.063 | 1.001 | 0.985 | 1.03  | 5.49E-01 |
| cds.Camellia_sinensis.comp2859_4_c0_seq1_m.35130 |                                                                                                                                                                       | 33.135 | 11.061 | 9.3  | 3  | 4  | 3  | 0.976 | 0.974 | 0.988 | 1.015 | 1.043 | 0.958 | 1.027 | 3.72E-01 |





|                                                  |                                                                               |        |        |      |   |    |   |       |       |       |       |       |       |       |          |
|--------------------------------------------------|-------------------------------------------------------------------------------|--------|--------|------|---|----|---|-------|-------|-------|-------|-------|-------|-------|----------|
|                                                  | PREDICT<br>ED:                                                                |        |        |      |   |    |   |       |       |       |       |       |       |       |          |
| cds.Camellia_sinensis.comp2861_4_c0_seq1_m.4055  | cytochrome b6-f complex iron-sulfur subunit 1, chloroplastic [Vitis vinifera] | 19.905 | 209.27 | 64.3 | 9 | 42 | 9 | 0.99  | 0.97  | 0.994 | 1.014 | 1.019 | 1.01  | 1.03  | 2.04E-02 |
|                                                  | PREDICT<br>ED: COP9                                                           |        |        |      |   |    |   |       |       |       |       |       |       |       |          |
| cds.Camellia_sinensis.comp2861_5_c0_seq1_m.28385 | signalosome complex subunit 6a [Vitis]                                        | 34.23  | 2.5372 | 3.9  | 1 | 1  | 1 |       |       |       |       |       |       |       |          |
|                                                  | PREDICT<br>ED:                                                                |        |        |      |   |    |   |       |       |       |       |       |       |       |          |
| cds.Camellia_sinensis.comp2861_6_c0_seq1_m.32795 | nuclear transcription factor Y subunit C-3-like [Cicer arietinum]             | 28.057 | 8.0652 | 16.9 | 4 | 4  | 3 | 0.926 | 1.111 | 0.959 | 1.014 | 0.968 | 1.037 | 1.008 | 8.69E-01 |
|                                                  | PREDICT<br>ED:                                                                |        |        |      |   |    |   |       |       |       |       |       |       |       |          |
| cds.Camellia_sinensis.comp2861_8_c0_seq1_m.22058 | thiamine thiazole synthase 2, chloroplastic [Nelumbo nucifera]                | 38.079 | 87.48  | 24.3 | 7 | 27 | 2 | 1.005 | 0.933 | 0.968 | 1.029 | 1.082 | 1.037 | 1.083 | 3.91E-02 |

|                       |                                                                                |        |        |      |    |    |    |       |       |       |       |       |       |       |          |
|-----------------------|--------------------------------------------------------------------------------|--------|--------|------|----|----|----|-------|-------|-------|-------|-------|-------|-------|----------|
| cds.Camellia_sinensis | PREDICTED:<br>thiamine thiazole synthase 2, chloroplastic [Nelumbo nucifera]   | 37.555 | 6.6661 | 23.8 | 6  | 26 | 1  | 1.02  | 0.979 | 0.992 | 1.043 | 1.043 | 0.946 | 1.014 | 7.33E-01 |
| cds.Camellia_sinensis | PREDICTED:<br>cytochrome b5 [Vitis vinifera]                                   | 18.273 | 18.801 | 16.2 | 2  | 2  | 2  | 1.217 | 1.16  | 1.125 | 0.743 | 0.876 | 0.823 | 0.697 | 2.42E-03 |
| cds.Camellia_sinensis | PREDICTED:<br>structural maintenance of chromosomes protein 1 [Vitis vinifera] | 140.04 | 1.511  | 0.9  | 1  | 1  | 1  |       |       |       |       |       |       |       |          |
| cds.Camellia_sinensis | PREDICTED:<br>cytochrome P450 94A1 [Sesamum indicum]                           | 46.848 | 2.4849 | 4.7  | 2  | 2  | 2  |       |       |       |       |       |       |       |          |
| cds.Camellia_sinensis | PREDICTED:<br>serpin-ZX [Theobroma cacao]                                      | 42.504 | 98.058 | 27.5 | 10 | 15 | 10 | 0.952 | 1.012 | 0.989 | 1.01  | 1.002 | 1.014 | 1.025 | 2.45E-01 |

|                                                 |                                                                                       |        |        |      |    |    |    |       |       |       |       |       |       |       |          |
|-------------------------------------------------|---------------------------------------------------------------------------------------|--------|--------|------|----|----|----|-------|-------|-------|-------|-------|-------|-------|----------|
| cds.Camellia_sinensis.comp28640_c0_seq8_m.15653 | PREDICTED:<br>serine/threonine-protein kinase STN7, chloroplastic [Juglans regia]     | 65.012 | 106.95 | 23.1 | 13 | 21 | 13 | 0.957 | 0.938 | 0.958 | 1.083 | 1.055 | 1.055 | 1.119 | 5.37E-04 |
| cds.Camellia_sinensis.comp28647_c1_seq1_m.46830 | PREDICTED: serine carboxypeptidase-like [Juglans regia]                               | 14.359 | 2.8562 | 6.4  | 1  | 2  | 1  | 1.034 | 0.942 | 1.046 | 1.013 | 0.958 | 1.012 | 0.987 | 7.63E-01 |
| cds.Camellia_sinensis.comp28649_c0_seq1_m.14486 | PREDICTED: la-related protein 6B [Juglans regia]                                      | 56.159 | 4.4973 | 2    | 1  | 1  | 1  | 1.185 | 1.089 | 1.089 | 0.8   | 0.87  | 0.923 | 0.771 | 6.50E-03 |
| cds.Camellia_sinensis.comp28650_c1_seq2_m.19059 | PREDICTED: probable acyl-activating enzyme 5, peroxisomal isoform X2 [Vitis vinifera] | 61.164 | 6.2333 | 3.9  | 2  | 3  | 2  | 0.838 | 0.928 | 1.006 | 1.173 | 1.046 | 1.059 | 1.183 | 5.78E-02 |





|                                                  |                                                                                               |        |        |      |    |    |    |       |       |       |       |       |       |       |          |
|--------------------------------------------------|-----------------------------------------------------------------------------------------------|--------|--------|------|----|----|----|-------|-------|-------|-------|-------|-------|-------|----------|
|                                                  | PREDICT<br>ED:<br>mitochondrial                                                               |        |        |      |    |    |    |       |       |       |       |       |       |       |          |
| cds.Camellia_sinensis.comp2868_6_c0_seq2_m.19806 | phosphate carrier protein 3, mitochondrial [Jatropha curcas]                                  | 45.833 | 23.38  | 20.8 | 9  | 17 | 2  | 1.049 | 0.971 | 1.037 | 0.973 | 0.991 | 0.98  | 0.963 | 2.07E-01 |
|                                                  | PREDICT<br>ED:<br>sodium/pyruvate cotransporter BASS2, chloroplastic [Vitis vinifera]         |        |        |      |    |    |    |       |       |       |       |       |       |       |          |
| cds.Camellia_sinensis.comp2868_9_c0_seq3_m.12759 | sodium/pyruvate cotransporter BASS2, chloroplastic [Vitis vinifera]                           | 28.424 | 2.7041 | 5.2  | 1  | 2  | 1  | 0.976 | 0.858 | 0.916 | 1.07  | 1.151 | 1.062 | 1.194 | 1.70E-02 |
|                                                  | PREDICT<br>ED:<br>serine/threonine-protein kinase SAPK2-like isoform X1 [Gossypium raimondii] |        |        |      |    |    |    |       |       |       |       |       |       |       |          |
| cds.Camellia_sinensis.comp2869_1_c0_seq1_m.31137 | serine/threonine-protein kinase SAPK2-like isoform X1 [Gossypium raimondii]                   | 20.204 | 2.1693 | 8.5  | 2  | 4  | 1  | 1.013 | 1.06  | 0.949 | 1.001 | 1.033 | 0.951 | 0.988 | 7.82E-01 |
|                                                  | PREDICT<br>ED: 2-hydroxyacyl-CoA lyase [Ipomoea nil]                                          |        |        |      |    |    |    |       |       |       |       |       |       |       |          |
| cds.Camellia_sinensis.comp2869_2_c0_seq1_m.16119 | ED: 2-hydroxyacyl-CoA lyase [Ipomoea nil]                                                     | 61.941 | 151.18 | 44.6 | 22 | 53 | 22 | 0.976 | 0.956 | 0.978 | 1.031 | 1.034 | 1.018 | 1.059 | 2.68E-03 |

|                       |                                                                                  |        |        |      |   |    |   |       |       |       |       |       |       |       |          |
|-----------------------|----------------------------------------------------------------------------------|--------|--------|------|---|----|---|-------|-------|-------|-------|-------|-------|-------|----------|
| cds.Camellia_sinensis | PREDICT<br>ED: golgin subfamily A member 2-like<br>[Nicotiana sylvestris]        | 29.593 | 67.315 | 29.2 | 9 | 17 | 9 | 1.04  | 1.031 | 1.048 | 0.96  | 0.964 | 0.939 | 0.918 | 8.16E-04 |
| cds.Camellia_sinensis | PREDICT<br>ED: fasciclin-like arabinogalactan protein 10<br>[Vitis vinifera]     | 43.524 | 13.772 | 7.6  | 3 | 3  | 3 | 1.063 | 1.018 | 1.029 | 0.953 | 0.996 | 0.935 | 0.927 | 2.94E-02 |
| cds.Camellia_sinensis | PREDICT<br>ED: protein-ribulosamine 3-kinase, chloroplastic<br>[Jatropha curcas] | 39.908 | 7.8604 | 10.7 | 4 | 6  | 4 | 0.948 | 1.009 | 0.955 | 1.01  | 0.979 | 1.066 | 1.049 | 2.07E-01 |
| cds.Camellia_sinensis | PREDICT<br>ED: BAHD acyltransferase DCR<br>[Nicotiana attenuata]                 | 49.995 | 46.095 | 13.4 | 5 | 6  | 5 | 1.335 | 1.368 | 1.341 | 0.636 | 0.605 | 0.629 | 0.462 | 6.90E-07 |





|                                                  |                                                                                                 |        |        |      |   |    |   |       |       |       |       |       |       |       |          |
|--------------------------------------------------|-------------------------------------------------------------------------------------------------|--------|--------|------|---|----|---|-------|-------|-------|-------|-------|-------|-------|----------|
| cds.Camellia_sinensis.comp2871_1_c0_seq1_m.30494 | PREDICTED:<br>bifunctional UDP-glucose 4-epimerase and UDP-xylose 4-epimerase 1 [Juglans regia] | 38.909 | 11.005 | 24.3 | 7 | 11 | 6 | 1.012 | 0.986 | 0.983 | 1.034 | 1.015 | 0.963 | 1.01  | 6.89E-01 |
| cds.Camellia_sinensis.comp2871_5_c0_seq1_m.16881 | PREDICTED: WD-40 repeat-containing protein MSI4-like [Populus euphratica]                       | 56.68  | 111.44 | 22.5 | 8 | 13 | 3 | 1.078 | 1.073 | 1.142 | 0.913 | 0.892 | 0.883 | 0.816 | 8.20E-04 |
| cds.Camellia_sinensis.comp2871_5_c0_seq2_m.17799 | PREDICTED: WD-40 repeat-containing protein MSI4-like [Populus euphratica]                       | 56.594 | 4.3342 | 18.4 | 6 | 12 | 1 |       |       |       |       |       |       |       |          |
| cds.Camellia_sinensis.comp2871_7_c0_seq2_m.31648 | PREDICTED: tryptophan synthase alpha chain-like [Citrus sinensis]                               | 33.301 | 53.794 | 36.9 | 8 | 11 | 8 | 0.935 | 0.935 | 0.944 | 1.13  | 1.076 | 1.039 | 1.153 | 2.87E-02 |

|                                                 |                                                                                            |        |        |      |    |    |    |       |       |       |       |       |       |       |          |
|-------------------------------------------------|--------------------------------------------------------------------------------------------|--------|--------|------|----|----|----|-------|-------|-------|-------|-------|-------|-------|----------|
| cds.Camellia_sinensis.comp28719_c0_seq1_m.15381 | PREDICTED:<br>suppressor of mec-8 and unc-52 protein homolog 1 isoform X1 [Vitis vinifera] | 60.164 | 10.895 | 10   | 5  | 6  | 5  | 0.954 | 0.918 | 0.929 | 1.016 | 1.09  | 1.125 | 1.154 | 1.16E-02 |
| cds.Camellia_sinensis.comp28721_c0_seq1_m.33393 | PREDICTED: DNA-directed RNA polymerases IV and V subunit 4 [Malus domestica]               | 23.06  | 3.4038 | 11.7 | 3  | 3  | 3  | 1.186 | 1.157 | 1.205 | 0.885 | 0.762 | 0.766 | 0.68  | 1.54E-03 |
| cds.Camellia_sinensis.comp28723_c0_seq1_m.811   | PREDICTED:<br>eukaryotic translation initiation factor 4G isoform X2 [Vitis vinifera]      | 207.74 | 18.041 | 4.5  | 7  | 9  | 7  | 1.012 | 0.982 | 1.054 | 0.931 | 1.024 | 0.999 | 0.969 | 4.18E-01 |
| cds.Camellia_sinensis.comp28724_c0_seq1_m.17777 | PREDICTED:<br>probable nucleoredoxin 1 isoform X1 [Prunus                                  | 66.378 | 151.68 | 41.5 | 23 | 56 | 22 | 0.892 | 0.899 | 0.881 | 1.113 | 1.114 | 1.112 | 1.25  | 7.01E-04 |

|                                                  |                                                                                                                            |        |        |      |    |    |    |       |       |       |       |       |       |       |          |
|--------------------------------------------------|----------------------------------------------------------------------------------------------------------------------------|--------|--------|------|----|----|----|-------|-------|-------|-------|-------|-------|-------|----------|
| cds.Camellia_sinensis.comp2872_4_c0_seq2_m.18204 | PREDICT<br>ED:<br>probable<br>nucleoredoxin 1<br>[Jatropha curcas]                                                         | 66.017 | 13.087 | 10.9 | 6  | 13 | 5  | 1.049 | 1.02  | 1.043 | 0.98  | 0.923 | 0.973 | 0.924 | 1.88E-02 |
| cds.Camellia_sinensis.comp2872_8_c0_seq1_m.39416 | PREDICT<br>ED:<br>probable<br>aminopyrimidine<br>aminohydroxylase,<br>mitochondrial isoform<br>X2 [Pyrus x bretschneideri] | 16.042 | 1.3906 | 11.3 | 2  | 3  | 1  | 0.982 | 0.875 | 0.974 | 0.944 | 1.123 | 1.121 | 1.126 | 1.63E-01 |
| cds.Camellia_sinensis.comp2873_2_c0_seq1_m.10852 | PREDICT<br>ED: acidic<br>repeat-containing<br>protein isoform<br>X1<br>[Populus euphratica]                                | 43.497 | -2     | 2.3  | 1  | 1  | 1  | 0.896 | 0.886 | 0.934 | 1.053 | 1.147 | 1.125 | 1.224 | 2.68E-03 |
| cds.Camellia_sinensis.comp2873_3_c0_seq1_m.10252 | PREDICT<br>ED:<br>threonine--tRNA<br>ligase,<br>mitochondrial 1<br>[Vitis                                                  | 84.386 | 60.04  | 27.2 | 22 | 34 | 22 | 0.974 | 0.944 | 0.95  | 1.06  | 1.056 | 1.026 | 1.096 | 2.90E-03 |



|                                                  |                                                                                          |        |        |      |   |    |   |       |       |       |       |       |       |       |          |
|--------------------------------------------------|------------------------------------------------------------------------------------------|--------|--------|------|---|----|---|-------|-------|-------|-------|-------|-------|-------|----------|
| cds.Camellia_sinensis.comp2874.8_c0_seq2_m.19166 | PREDICTED:<br>putative G3BP-like protein isoform X4 [Juglans regia]                      | 46.869 | 7.2712 | 8.4  | 4 | 5  | 4 | 1.013 | 1.046 | 0.996 | 0.946 | 1.023 | 0.974 | 0.963 | 2.35E-01 |
| cds.Camellia_sinensis.comp2874.9_c0_seq2_m.10694 | PREDICTED: ABC transporter B family member 26, chloroplastic isoform X1 [Vitis vinifera] | 76.502 | 41.596 | 10.1 | 7 | 7  | 7 | 0.965 | 1.036 | 1.011 | 1.031 | 0.947 | 1.023 | 0.996 | 9.13E-01 |
| cds.Camellia_sinensis.comp2875.1_c0_seq1_m.36414 | PREDICTED: non-specific lipid transfer protein GPI-anchored 1 [Vitis vinifera]           | 20.567 | 6.1567 | 5.2  | 1 | 1  | 1 | 1.458 | 1.459 | 1.338 | 0.517 | 0.547 | 0.543 | 0.378 | 4.31E-06 |
| cds.Camellia_sinensis.comp2875.1_c1_seq1_m.26359 | PREDICTED:<br>metacaspase-4 [Theobroma cacao]                                            | 46.206 | 33.742 | 21.6 | 9 | 13 | 9 | 1.017 | 1.038 | 1.044 | 0.944 | 0.993 | 0.987 | 0.944 | 3.07E-02 |

|                                |                                                                                        |        |        |      |   |    |   |       |       |       |       |       |       |       |          |
|--------------------------------|----------------------------------------------------------------------------------------|--------|--------|------|---|----|---|-------|-------|-------|-------|-------|-------|-------|----------|
| cds.Camellia_sinensis.comp2875 | PREDICTED:<br>probable pectinesterase/pectinesterase inhibitor 61<br>[Sesamum indicum] | 65.748 | 23.809 | 7.5  | 5 | 9  | 5 | 1.059 | 1.018 | 1.062 | 0.936 | 0.934 | 0.943 | 0.896 | 1.42E-03 |
| cds.Camellia_sinensis.comp2875 | PREDICTED:<br>aldose 1-epimerase<br>[Juglans regia]                                    | 37.045 | 14.618 | 16.8 | 5 | 9  | 5 | 0.949 | 0.96  | 0.988 | 1.036 | 1.057 | 0.989 | 1.064 | 5.55E-02 |
| cds.Camellia_sinensis.comp2876 | PREDICTED:<br>nitrile-specifier protein 5<br>[Daucus carota subsp. sativus]            | 39.845 | 29.873 | 34.7 | 9 | 11 | 9 | 1.038 | 1.038 | 0.982 | 0.976 | 0.998 | 0.927 | 0.949 | 1.39E-01 |
| cds.Camellia_sinensis.comp2876 | plant/F17 O14-7 protein<br>[Medicago truncatula]                                       | 32.627 | 3.6145 | 10.7 | 3 | 3  | 3 | 1.013 | 1.008 | 0.964 | 0.977 | 1.012 | 1.032 | 1.012 | 6.22E-01 |
| cds.Camellia_sinensis.comp2877 | PREDICTED:<br>probable endo-1,3(4)-beta-glucanase ARB_01444<br>[Citrus sinensis]       | 17.185 | 17.11  | 23.8 | 3 | 7  | 3 | 0.984 | 0.915 | 0.921 | 1.102 | 1.02  | 1.078 | 1.135 | 1.80E-02 |



|                                                    |                                                                           |        |        |      |    |    |    |       |       |       |       |       |       |       |          |
|----------------------------------------------------|---------------------------------------------------------------------------|--------|--------|------|----|----|----|-------|-------|-------|-------|-------|-------|-------|----------|
|                                                    | PREDICT<br>ED:                                                            |        |        |      |    |    |    |       |       |       |       |       |       |       |          |
| cds.Camellia_sinensis.comp2879_4_c0_seq1_m.19751   | glutamine synthetase leaf isozyyme, chloroplastic [Juglans regia]         | 47.936 | 121.11 | 42.4 | 16 | 43 | 16 | 1.067 | 1.037 | 1.03  | 0.946 | 0.954 | 0.95  | 0.909 | 1.02E-03 |
|                                                    | PREDICT<br>ED: non-specific phospholipase C2 isoform X2 [Citrus sinensis] |        |        |      |    |    |    |       |       |       |       |       |       |       |          |
| cds.Camellia_sinensis.comp2879_7_c0_seq1_m.33679   | phospholipase C2 isoform X2 [Citrus sinensis]                             | 40.953 | 2.1263 | 8.2  | 3  | 4  | 2  | 1.009 | 1.013 | 1.027 | 0.932 | 1.021 | 1     | 0.969 | 3.09E-01 |
|                                                    | PREDICT<br>ED:                                                            |        |        |      |    |    |    |       |       |       |       |       |       |       |          |
| cds.Camellia_sinensis.comp2880_3_c0_seq1_m.13853   | xylulose kinase [Vitis vinifera]                                          | 61.118 | 52.011 | 19.4 | 9  | 16 | 9  | 0.961 | 0.979 | 0.963 | 1.067 | 1.035 | 1.017 | 1.074 | 9.24E-03 |
|                                                    | PREDICT<br>ED:                                                            |        |        |      |    |    |    |       |       |       |       |       |       |       |          |
| cds.Camellia_sinensis.comp2880_99_c0_seq1_m.5882_9 | universal stress protein A-like protein isoform X2 [Cucumis sativus]      | 11.806 | 1.4107 | 7.7  | 1  | 2  | 1  | 0.991 | 1.044 | 0.926 | 0.975 | 1.043 | 1.03  | 1.029 | 5.03E-01 |



|                                |                   |                                                                                                                |        |        |     |   |   |   |       |       |       |       |       |       |       |          |
|--------------------------------|-------------------|----------------------------------------------------------------------------------------------------------------|--------|--------|-----|---|---|---|-------|-------|-------|-------|-------|-------|-------|----------|
| cds.Camellia_sinensis.comp2881 | 3_c1_seq1_m.29578 | PREDICTED:<br>protein<br>ASPARTIC<br>PROTEASE IN<br>GUARD CELL 2-<br>like<br>[Sesamum indicum]                 | 40.944 | 4.1554 | 4.7 | 1 | 1 | 1 |       |       |       |       |       |       |       |          |
| cds.Camellia_sinensis.comp2881 | 4_c0_seq1_m.25455 | PREDICTED:<br>probable<br>3-<br>hydroxyisobutyrate<br>dehydrogenase,<br>mitochondrial<br>isoform<br>X1 [Vitis] | 39.572 | 1.3916 | 2.2 | 1 | 1 | 1 | 1.097 | 1.028 | 1.088 | 0.864 | 0.998 | 0.908 | 0.862 | 3.33E-02 |
| cds.Camellia_sinensis.comp2881 | 8_c0_seq1_m.28081 | PREDICTED:<br>protein<br>HGH1<br>homolog<br>[Gossypium<br>hirsutum]                                            | 38.528 | 2.491  | 2.6 | 1 | 1 | 1 | 0.998 | 0.941 | 0.98  | 0.922 | 1.057 | 1.11  | 1.058 | 4.07E-01 |

|                                                 |                                                                                                                                                                 |        |        |      |    |    |   |       |       |       |       |       |       |       |          |
|-------------------------------------------------|-----------------------------------------------------------------------------------------------------------------------------------------------------------------|--------|--------|------|----|----|---|-------|-------|-------|-------|-------|-------|-------|----------|
| cds.Camellia_sinensis.comp28827_c0_seq7_m.56542 | PREDICTED:<br>probable polygalacturonase isoform X1<br>[Nicotiana sylvestris] photosystem I chlorophyll a/b-binding protein 5, chloroplastic<br>[Cajanus cajan] | 13.465 | 3.3225 | 12.2 | 1  | 1  | 1 | 1.043 | 1.039 | 1.043 | 0.966 | 1.068 | 0.841 | 0.92  | 3.31E-01 |
| cds.Camellia_sinensis.comp28828_c0_seq5_m.27283 | PREDICTED:<br>lys-63-specific deubiquitinase BRCC36-like<br>[Jatropha curcas]                                                                                   | 12.144 | 2.6082 | 8.9  | 1  | 2  | 1 | 0.92  | 1.032 | 1.017 | 0.964 | 1.059 | 1.025 | 1.027 | 5.87E-01 |
| cds.Camellia_sinensis.comp28830_c0_seq1_m.25500 | PREDICTED:<br>14-3-3-like protein A<br>[Theobroma cacao]                                                                                                        | 50.006 | 14.061 | 17.6 | 7  | 7  | 7 | 1.114 | 1.097 | 1.013 | 0.955 | 0.925 | 0.891 | 0.859 | 1.33E-02 |
| cds.Camellia_sinensis.comp28835_c0_seq1_m.35332 | PREDICTED:<br>14-3-3-like protein A<br>[Theobroma cacao]                                                                                                        | 29.421 | 45.168 | 44.8 | 14 | 51 | 9 | 0.951 | 0.969 | 0.937 | 1.019 | 1.058 | 1.037 | 1.09  | 4.10E-03 |

|                                                  |                                                                                    |        |        |      |    |    |    |       |       |       |       |       |       |       |          |
|--------------------------------------------------|------------------------------------------------------------------------------------|--------|--------|------|----|----|----|-------|-------|-------|-------|-------|-------|-------|----------|
| cds.Camellia_sinensis.comp2883_6_c0_seq1_m.11655 | PREDICT<br>ED:<br>formate--<br>tetrahydrofolate<br>ligase<br>[Populus euphratica]  | 67.527 | 227.29 | 42.5 | 23 | 55 | 23 | 1.008 | 0.974 | 0.987 | 1.017 | 1.031 | 1.017 | 1.032 | 4.39E-02 |
| cds.Camellia_sinensis.comp2884_4_c0_seq1_m.6125  | PREDICT<br>ED: endo-<br>1,4-beta-xylanase<br>A-like<br>[Ziziphus jujuba]           | 104.79 | 11.525 | 2.8  | 2  | 2  | 2  | 1.066 | 1.213 | 1.185 | 0.819 | 0.75  | 0.929 | 0.721 | 1.11E-02 |
| cds.Camellia_sinensis.comp2884_5_c0_seq1_m.28073 | PREDICT<br>ED:<br>ubiquinol<br>oxidase,<br>mitochondrial-like<br>[Prunus mume]     | 44.246 | 16.262 | 15.4 | 6  | 7  | 6  | 1.004 | 0.952 | 0.995 | 0.997 | 1.013 | 1.008 | 1.023 | 2.55E-01 |
| cds.Camellia_sinensis.comp2884_6_c0_seq1_m.27141 | PREDICT<br>ED:<br>hydroxyphenylpyruvate<br>reductase-like<br>[Nicotiana attenuata] | 34.145 | 17.397 | 20.1 | 6  | 10 | 6  | 1.003 | 0.988 | 1.002 | 1.027 | 1.011 | 1.034 | 1.026 | 3.43E-02 |

|                                                  |                                                                                                   |        |        |      |   |    |   |       |       |       |       |       |       |       |          |
|--------------------------------------------------|---------------------------------------------------------------------------------------------------|--------|--------|------|---|----|---|-------|-------|-------|-------|-------|-------|-------|----------|
| cds.Camellia_sinensis.comp2885_3_c0_seq4_m.31738 | PREDICTED:<br>kinesin-like protein KIN-7M, chloroplastic [Camelina sativa]                        | 31.984 | 15.435 | 20.1 | 6 | 14 | 6 | 1.037 | 1.028 | 1.056 | 0.971 | 0.982 | 0.966 | 0.935 | 1.96E-03 |
| cds.Camellia_sinensis.comp2885_6_c0_seq1_m.1934  | PREDICTED:<br>transformation/transcription domain-associated protein isoform X4 [Capsicum annuum] | 156.62 | 5.6    | 2.3  | 3 | 3  | 3 |       |       |       |       |       |       |       |          |
| cds.Camellia_sinensis.comp2885_6_c1_seq1_m.467   | PREDICTED:<br>transcription-associated protein 1 isoform X1 [Vitis vinifera]                      | 263.9  | 15.47  | 0.9  | 2 | 2  | 2 | 0.988 | 1.002 | 0.973 | 1.011 | 1.015 | 1.025 | 1.03  | 3.57E-02 |

|                                                 |                                                                                                                                                   |        |        |      |   |   |   |       |       |       |       |       |       |       |          |
|-------------------------------------------------|---------------------------------------------------------------------------------------------------------------------------------------------------|--------|--------|------|---|---|---|-------|-------|-------|-------|-------|-------|-------|----------|
| cds.Camellia_sinensis.comp28859_c0_seq6_m.54527 | PREDICTED:<br>NEDD8-conjugating enzyme Ubc12-like isoform X2<br>[Ziziphus jujuba]                                                                 | 11.238 | 4.1712 | 17.2 | 3 | 3 | 3 | 0.985 | 0.96  | 0.956 | 1.07  | 0.998 | 1.05  | 1.075 | 3.46E-02 |
| cds.Camellia_sinensis.comp28864_c0_seq1_m.15106 | PREDICTED: SNF1-related protein kinase catalytic subunit alpha KIN10<br>[Cucumis sativus]                                                         | 24.26  | 8.7014 | 13.7 | 3 | 3 | 3 | 0.987 | 1.016 | 0.991 | 1.064 | 0.987 | 1.028 | 1.028 | 3.06E-01 |
| cds.Camellia_sinensis.comp28865_c0_seq1_m.27741 | PREDICTED: 33 kDa ribonucleo protein, chloroplastic<br>[Erythraea guttata] WSC domain-containing protein ARB_07867 precursor<br>[Ziziphus jujuba] | 36.156 | 83.966 | 20   | 4 | 8 | 4 | 1.114 | 1.162 | 1.129 | 0.859 | 0.883 | 0.838 | 0.758 | 1.42E-04 |
| cds.Camellia_sinensis.comp28869_c0_seq1_m.20929 | PREDICTED: 33 kDa ribonucleo protein, chloroplastic<br>[Erythraea guttata] WSC domain-containing protein ARB_07867 precursor<br>[Ziziphus jujuba] | 60.625 | 4.5543 | 4.4  | 2 | 2 | 2 | 1.071 | 1.133 | 1     | 0.995 | 0.886 | 0.903 | 0.869 | 5.09E-02 |

|                                                  |                                                                               |        |        |      |    |    |    |       |       |       |       |       |       |       |          |
|--------------------------------------------------|-------------------------------------------------------------------------------|--------|--------|------|----|----|----|-------|-------|-------|-------|-------|-------|-------|----------|
| cds.Camellia_sinensis.comp2887_6_c0_seq2_m.40932 | dynein beta chain, ciliary protein [Arabidopsis thaliana]                     | 20.927 | 15.71  | 38.2 | 6  | 6  | 6  | 0.979 | 1.016 | 0.957 | 1.078 | 0.899 | 1.085 | 1.037 | 6.32E-01 |
| cds.Camellia_sinensis.comp2887_7_c0_seq1_m.15313 | PREDICTED: cytosolic enolase 3 [Ipomoea nil]                                  | 39.649 | 5.8113 | 12.5 | 3  | 3  | 3  |       |       |       |       |       |       |       |          |
| cds.Camellia_sinensis.comp2887_7_c0_seq1_m.15314 | Cytosolic enolase 3 [Morus notabilis]                                         | 14.166 | 2.1048 | 8.5  | 1  | 1  | 1  |       |       |       |       |       |       |       |          |
| cds.Camellia_sinensis.comp2888_5_c0_seq1_m.17355 | PREDICTED: galactinol-sucrose galactosyltransferase-like [Erythraea guttata]  | 69.958 | 41.945 | 16.6 | 12 | 27 | 12 | 1.116 | 1.108 | 1.108 | 0.872 | 0.874 | 0.865 | 0.784 | 2.06E-07 |
| cds.Camellia_sinensis.comp2889_0_c0_seq2_m.42508 | PREDICTED: zinc finger CCCH domain-containing protein 14-like [Juglans regia] | 16.33  | 16.232 | 25.2 | 3  | 6  | 1  | 0.878 | 1.003 | 1.088 | 1.009 | 0.919 | 1.124 | 1.028 | 7.59E-01 |

|                                                  |                                                                                                                                                                                                                                                                                                                        |        |        |      |    |    |   |       |       |       |       |       |       |       |          |
|--------------------------------------------------|------------------------------------------------------------------------------------------------------------------------------------------------------------------------------------------------------------------------------------------------------------------------------------------------------------------------|--------|--------|------|----|----|---|-------|-------|-------|-------|-------|-------|-------|----------|
| cds.Camellia_sinensis.comp2889_1_c0_seq1_m.36773 | RmlC-like cupins superfamily protein [Arabidopsis thaliana] potassium/sodium hyperpolarization-activated cyclic nucleotide-gated channel protein [Arabidopsis thaliana] PREDICTED: 17.3 kDa class I heat shock protein-like [Gossypium raimondii] PREDICTED: phosphoenolpyruvate carboxykinase [ATP] [Ziziphus jujuba] | 19.337 | 28.901 | 33   | 5  | 12 | 5 | 1.031 | 1.043 | 0.989 | 0.968 | 0.982 | 0.982 | 0.957 | 6.12E-02 |
| cds.Camellia_sinensis.comp2890_1_c0_seq1_m.42012 | activated cyclic nucleotide-gated channel protein [Arabidopsis thaliana] PREDICTED: 17.3 kDa class I heat shock protein-like [Gossypium raimondii] PREDICTED: phosphoenolpyruvate carboxykinase [ATP] [Ziziphus jujuba]                                                                                                | 11.287 | 6.6911 | 24.2 | 3  | 4  | 3 | 0.953 | 1.04  | 1.008 | 0.967 | 1.04  | 0.976 | 0.994 | 8.72E-01 |
| cds.Camellia_sinensis.comp2891_1_c0_seq2_m.47475 | kDa class I heat shock protein-like [Gossypium raimondii] PREDICTED: phosphoenolpyruvate carboxykinase [ATP] [Ziziphus jujuba]                                                                                                                                                                                         | 17.116 | 74.141 | 46   | 6  | 16 | 4 | 1.108 | 1.063 | 1.106 | 0.864 | 0.896 | 0.917 | 0.817 | 7.77E-04 |
| cds.Camellia_sinensis.comp2891_7_c0_seq1_m.11358 | phosphoenolpyruvate carboxykinase [ATP] [Ziziphus jujuba]                                                                                                                                                                                                                                                              | 73.587 | 59.256 | 20.5 | 11 | 18 | 6 | 0.898 | 0.958 | 0.916 | 1.13  | 1.042 | 1.077 | 1.172 | 6.38E-03 |





|                                                  |                                                                 |        |        |      |    |    |   |       |       |       |       |       |       |       |          |
|--------------------------------------------------|-----------------------------------------------------------------|--------|--------|------|----|----|---|-------|-------|-------|-------|-------|-------|-------|----------|
|                                                  | PREDICT                                                         |        |        |      |    |    |   |       |       |       |       |       |       |       |          |
|                                                  | ED:                                                             |        |        |      |    |    |   |       |       |       |       |       |       |       |          |
| cds.Camellia_sinensis.comp2892_7_c0_seq2_m.8142  | serine/threonine-kinase BLUS1 [Theobroma cacao]                 | 75.838 | 1.8571 | 1.9  | 1  | 1  | 1 |       |       |       |       |       |       |       |          |
|                                                  | PREDICT                                                         |        |        |      |    |    |   |       |       |       |       |       |       |       |          |
|                                                  | ED:                                                             |        |        |      |    |    |   |       |       |       |       |       |       |       |          |
| cds.Camellia_sinensis.comp2892_8_c0_seq1_m.26817 | aspartic proteinase nepenthesisin-1 [Ziziphus jujuba]           | 43.084 | 16.425 | 8.8  | 4  | 6  | 4 | 1.071 | 1.033 | 1.121 | 0.925 | 0.96  | 0.894 | 0.862 | 9.00E-03 |
|                                                  | PREDICT                                                         |        |        |      |    |    |   |       |       |       |       |       |       |       |          |
|                                                  | ED:                                                             |        |        |      |    |    |   |       |       |       |       |       |       |       |          |
| cds.Camellia_sinensis.comp2893_5_c0_seq1_m.36443 | proteasome subunit alpha type-3 isoform X1 [Gossypium hirsutum] | 28.552 | 35.829 | 45.7 | 11 | 21 | 8 | 0.917 | 1.014 | 0.973 | 1.001 | 1.071 | 1.043 | 1.073 | 1.15E-01 |
|                                                  | PREDICT                                                         |        |        |      |    |    |   |       |       |       |       |       |       |       |          |
|                                                  | ED:                                                             |        |        |      |    |    |   |       |       |       |       |       |       |       |          |
| cds.Camellia_sinensis.comp2893_5_c0_seq2_m.57987 | proteasome subunit alpha type-3 [Jatropha curcas]               | 11.827 | 31.424 | 40   | 4  | 6  | 4 | 0.965 | 0.985 | 0.962 | 1.052 | 1.025 | 1.046 | 1.072 | 2.96E-03 |

|                                                  |                                                                                                                            |        |        |      |   |    |   |       |       |       |       |       |       |       |          |
|--------------------------------------------------|----------------------------------------------------------------------------------------------------------------------------|--------|--------|------|---|----|---|-------|-------|-------|-------|-------|-------|-------|----------|
| cds.Camellia_sinensis.comp2894_5_c0_seq1_m.36810 | PREDICT<br>ED:<br>elongation factor P-like<br>[Nicotiana tabacum]                                                          | 25.742 | 1.1763 | 3.4  | 1 | 1  | 1 | 1.06  | 1.012 | 1.134 | 0.964 | 0.871 | 0.949 | 0.868 | 3.67E-02 |
| cds.Camellia_sinensis.comp2894_8_c0_seq1_m.3320  | PREDICT<br>ED:<br>protein<br>CROWDED<br>NUCLEI 1<br>[Cucumis melo]                                                         | 73.4   | 13.392 | 12.9 | 9 | 10 | 8 | 1.124 | 1.066 | 1.07  | 0.893 | 0.884 | 0.886 | 0.817 | 3.15E-04 |
| cds.Camellia_sinensis.comp2894_8_c0_seq1_m.3321  | PREDICT<br>ED:<br>protein<br>CROWDED<br>NUCLEI 1<br>isoform X2 [Vitis]                                                     | 58.7   | 3.0255 | 3.6  | 2 | 2  | 2 | 1.003 | 1.094 | 1.167 | 0.913 | 0.953 | 0.862 | 0.836 | 2.76E-02 |
| cds.Camellia_sinensis.comp2895_3_c0_seq1_m.27824 | PREDICT<br>ED:<br>mediator of RNA polymerase II<br>transcripton subunit 15a<br>isoform X2<br>[Fragaria vesca subsp. vesca] | 44.129 | 1.47   | 2    | 1 | 1  | 1 | 1.092 | 1.017 | 1.035 | 0.948 | 0.918 | 0.978 | 0.905 | 2.36E-02 |



|                                                  |                                                                               |        |        |      |    |    |    |       |       |       |       |       |       |       |          |
|--------------------------------------------------|-------------------------------------------------------------------------------|--------|--------|------|----|----|----|-------|-------|-------|-------|-------|-------|-------|----------|
| cds.Camellia_sinensis.comp2896_4_c0_seq3_m.39000 | PREDICT<br>ED: target of Myb protein 1 [Vitis vinifera]                       | 26.211 | 3.372  | 15.6 | 3  | 5  | 3  | 1.046 | 0.926 | 1.007 | 0.949 | 0.992 | 1.013 | 0.992 | 8.63E-01 |
| cds.Camellia_sinensis.comp2896_7_c0_seq1_m.49180 | PREDICT<br>ED: heat shock cognate 70 kDa protein [Solanum lycopersicum]       | 22.519 | 4.4789 | 43.5 | 9  | 24 | 1  | 0.977 | 1.067 | 0.924 | 0.972 | 0.957 | 1.11  | 1.024 | 7.32E-01 |
| cds.Camellia_sinensis.comp2896_8_c0_seq3_m.7600  | PREDICT<br>ED: BEL1-like homeodomain protein 1 [Vitis vinifera]               | 76.287 | 2.9242 | 3.2  | 2  | 2  | 1  |       |       |       |       |       |       |       |          |
| cds.Camellia_sinensis.comp2896_9_c0_seq2_m.31057 | PREDICT<br>ED: mRNA-decapping enzyme subunit 2 [Daucus carota subsp. sativus] | 36.607 | 6.1684 | 6.5  | 2  | 3  | 2  | 0.864 | 1.052 | 0.985 | 1.151 | 0.964 | 1.021 | 1.081 | 3.71E-01 |
| cds.Camellia_sinensis.comp2897_1_c0_seq1_m.16528 | PREDICT<br>ED: cyclase-associated protein 1 [Vitis vinifera]                  | 62.147 | 27.245 | 20.5 | 13 | 17 | 13 | 0.973 | 0.956 | 0.998 | 1.009 | 1.019 | 1.024 | 1.043 | 3.37E-02 |

|                                                  |                                                                                                     |        |        |      |    |    |    |       |       |       |       |       |       |       |          |
|--------------------------------------------------|-----------------------------------------------------------------------------------------------------|--------|--------|------|----|----|----|-------|-------|-------|-------|-------|-------|-------|----------|
| cds.Camellia_sinensis.comp2897_5_c0_seq1_m.17459 | transcriptional repressor [Arabidopsis lyrata subsp. lyrata] PREDICTED: putative WEB family protein | 67.725 | 143.68 | 29.2 | 16 | 37 | 16 | 1.015 | 1.016 | 1.003 | 0.986 | 0.988 | 0.987 | 0.976 | 2.82E-02 |
| cds.Camellia_sinensis.comp2897_7_c0_seq3_m.38961 | At1g65010, chloroplastic [Malus domestica] photosystem I P700 chlorophyll                           | 23.82  | 1.2572 | 6    | 1  | 1  | 1  |       |       |       |       |       |       |       |          |
| cds.Camellia_sinensis.comp2898_0_c0_seq4_m.400   | 1 A apoprotein A2 (chloroplast) [Camellia crapnelliana] photosystem I P700 chlorophyll              | 82.369 | 264.44 | 20.2 | 11 | 59 | 11 | 1.013 | 1.013 | 1.02  | 0.97  | 0.99  | 0.976 | 0.964 | 4.70E-03 |
| cds.Camellia_sinensis.comp2898_0_c0_seq4_m.401   | 1 A apoprotein A1 (chloroplast) [Camellia crapnelliana]                                             | 56.528 | 40.312 | 15.5 | 9  | 26 | 9  | 1.025 | 0.989 | 1.007 | 0.992 | 1.019 | 0.986 | 0.992 | 6.11E-01 |

|                                                  |                                                                                      |        |        |      |    |    |    |       |       |       |       |       |       |       |          |
|--------------------------------------------------|--------------------------------------------------------------------------------------|--------|--------|------|----|----|----|-------|-------|-------|-------|-------|-------|-------|----------|
| cds.Camellia_sinensis.comp2898_0_c0_seq4_m.404   | photosystem I P700 chlorophyll a apoprotein A1 (chloroplast) [Camellia crapnelliana] | 17.031 | 23.712 | 15.9 | 3  | 12 | 3  | 1.012 | 1.018 | 1.054 | 0.938 | 0.999 | 0.954 | 0.937 | 4.61E-02 |
| cds.Camellia_sinensis.comp2898_1_c0_seq2_m.32966 | PREDICTED: protein trichome birefringence-like 38 [Sesamum indicum]                  | 44.457 | 26.795 | 14.4 | 4  | 7  | 4  | 1.11  | 1.146 | 1.138 | 0.863 | 0.872 | 0.88  | 0.77  | 2.01E-05 |
| cds.Camellia_sinensis.comp2898_3_c1_seq1_m.15218 | PREDICTED: selenoprotein O [Jatropha curcas]                                         | 73.473 | 101.58 | 37.3 | 23 | 32 | 23 | 1.022 | 1.006 | 1.004 | 0.96  | 1.014 | 1.007 | 0.983 | 3.95E-01 |
| cds.Camellia_sinensis.comp2898_4_c0_seq1_m.44429 | PREDICTED: cysteine proteinase inhibitor-like [Populus euphratica]                   | 13.513 | 76.668 | 33.1 | 6  | 19 | 2  | 1.116 | 1.075 | 1.204 | 0.821 | 0.905 | 0.852 | 0.759 | 3.28E-03 |
| cds.Camellia_sinensis.comp2898_4_c0_seq2_m.46176 | PREDICTED: cysteine proteinase inhibitor [Ricinus communis]                          | 11.614 | 63.439 | 36.8 | 5  | 16 | 1  | 0.95  | 0.895 | 0.981 | 1.032 | 1.12  | 1.068 | 1.139 | 2.19E-02 |







|                                                  |                                                                                    |        |        |      |   |    |   |       |       |       |       |       |       |       |          |
|--------------------------------------------------|------------------------------------------------------------------------------------|--------|--------|------|---|----|---|-------|-------|-------|-------|-------|-------|-------|----------|
| cds.Camellia_sinensis.comp2900_9_c2_seq1_m.33399 | PREDICT<br>ED:<br>translation machinery-associated protein 22 [Populus euphratica] | 22.946 | 2.5605 | 11.2 | 2 | 2  | 2 | 1.113 | 1.116 | 0.976 | 0.946 | 0.878 | 0.951 | 0.866 | 4.94E-02 |
| cds.Camellia_sinensis.comp2901_1_c0_seq1_m.33325 | PREDICT<br>ED: ACT domain-containing protein ACR12 [Juglans regia]                 | 34.168 | 30.961 | 18.8 | 6 | 11 | 6 | 1.015 | 1.012 | 0.996 | 1.004 | 0.995 | 0.99  | 0.989 | 1.90E-01 |
| cds.Camellia_sinensis.comp2901_3_c0_seq1_m.15937 | PREDICT<br>ED: TPR repeat-containing thioredoxin TDX isoform X2 [Malus domestica]  | 44.496 | 34.283 | 15.1 | 7 | 9  | 7 | 1.135 | 1.116 | 1.139 | 0.854 | 0.893 | 0.867 | 0.771 | 5.88E-05 |
| cds.Camellia_sinensis.comp2901_3_c0_seq1_m.15938 | PREDICT<br>ED:<br>ubiquitin receptor RAD23c-like [Vigna                            | 17.285 | 55.608 | 33.7 | 3 | 7  | 3 | 1.072 | 0.946 | 0.963 | 0.979 | 1.035 | 1.003 | 1.012 | 7.69E-01 |



|                                                  |                                                                                |        |        |      |   |    |   |       |       |       |       |       |       |       |          |
|--------------------------------------------------|--------------------------------------------------------------------------------|--------|--------|------|---|----|---|-------|-------|-------|-------|-------|-------|-------|----------|
| cds.Camellia_sinensis.comp2902_6_c0_seq1_m.42170 | PREDICT<br>ED:<br>probable glutathione S-transferase [Populus euphratica]      | 25.622 | 1.2231 | 5.4  | 1 | 1  | 1 |       |       |       |       |       |       |       |          |
| cds.Camellia_sinensis.comp2902_8_c0_seq1_m.20116 | PREDICT<br>ED: ras-related protein Rab11D [Vitis vinifera]                     | 24.928 | 5.7706 | 26.7 | 6 | 8  | 5 | 0.997 | 1.05  | 1.05  | 0.952 | 0.919 | 0.933 | 0.905 | 7.80E-03 |
| cds.Camellia_sinensis.comp2903_2_c0_seq1_m.32431 | PREDICT<br>ED:<br>proteasome subunit beta type-2-A-like [Jatropha curcas]      | 22.685 | 55.433 | 36.6 | 8 | 13 | 3 | 0.979 | 1.024 | 0.987 | 1.011 | 1.035 | 1.032 | 1.029 | 1.36E-01 |
| cds.Camellia_sinensis.comp2903_2_c0_seq2_m.54937 | PREDICT<br>ED:<br>proteasome subunit beta type-2-B [Ipomoea nil]               | 15.189 | 3.3625 | 42.8 | 6 | 10 | 1 | 0.94  | 0.96  | 0.989 | 1.01  | 1.104 | 1.022 | 1.085 | 6.12E-02 |
| cds.Camellia_sinensis.comp2903_9_c0_seq1_m.39236 | PREDICT<br>ED:<br>ubiquitin-conjugating enzyme E2 variant 1D [Sesamum indicum] | 16.562 | 77.395 | 58.9 | 8 | 21 | 8 | 1.01  | 0.973 | 0.989 | 1.002 | 1.041 | 1.017 | 1.03  | 1.33E-01 |

|                                                  |                                                                                 |        |        |      |   |   |   |       |       |       |       |       |       |       |          |
|--------------------------------------------------|---------------------------------------------------------------------------------|--------|--------|------|---|---|---|-------|-------|-------|-------|-------|-------|-------|----------|
| cds.Camellia_sinensis.comp2904_6_c0_seq1_m.29078 | PREDICT<br>ED: aldo-keto reductase family 4 member C9-like [Gossypium arboreum] | 35.072 | 8.9395 | 14.6 | 6 | 9 | 6 | 1.039 | 0.958 | 0.997 | 1.011 | 1.032 | 0.997 | 1.015 | 5.71E-01 |
| cds.Camellia_sinensis.comp2904_8_c0_seq1_m.26319 | PREDICT<br>ED: myb-related protein Myb4 [Theobroma cacao]                       | 42.111 | 1.5658 | 3.1  | 1 | 1 | 1 | 1.057 | 0.85  | 0.991 | 1.033 | 1.023 | 1.058 | 1.075 | 3.66E-01 |
| cds.Camellia_sinensis.comp2905_2_c0_seq1_m.19282 | PREDICT<br>ED: cell division control protein 7 [Ziziphus jujuba]                | 31.035 | 1.7548 | 4    | 1 | 2 | 1 |       |       |       |       |       |       |       |          |
| cds.Camellia_sinensis.comp2905_2_c0_seq1_m.19283 | PREDICT<br>ED: E3 ubiquitin-protein ligase KEG [Sesamum indicum]                | 28.627 | 1.5985 | 5.1  | 1 | 1 | 1 |       |       |       |       |       |       |       |          |
| cds.Camellia_sinensis.comp2906_4_c0_seq1_m.4735  | PREDICT<br>ED: protein transport protein SEC23 [Vitis vinifera]                 | 95.394 | 8.4967 | 4.3  | 4 | 4 | 4 | 0.89  | 1.028 | 0.976 | 1.151 | 0.964 | 1.037 | 1.089 | 2.73E-01 |

|                                                 |                                                                                             |        |        |      |    |    |    |       |       |       |       |       |       |       |          |
|-------------------------------------------------|---------------------------------------------------------------------------------------------|--------|--------|------|----|----|----|-------|-------|-------|-------|-------|-------|-------|----------|
| cds.Camellia_sinensis.comp29074_c0_seq1_m.15684 | PREDICT ED: enolase-phosphatase E1 [Vitis vinifera]                                         | 54.971 | 3.253  | 2.1  | 1  | 2  | 1  | 1.079 | 0.986 | 0.953 | 0.943 | 1.037 | 0.999 | 0.987 | 8.02E-01 |
| cds.Camellia_sinensis.comp29075_c0_seq1_m.18691 | PREDICT ED: inactive dipeptidyl peptidase 10-like isoform X1 [Daucus carota subsp. sativus] | 66.517 | 135.54 | 27.8 | 16 | 24 | 16 | 0.94  | 0.931 | 0.936 | 1.086 | 1.064 | 1.074 | 1.149 | 2.47E-05 |
| cds.Camellia_sinensis.comp29080_c0_seq1_m.18560 | PREDICT ED: chorismate synthase 1, chloroplastic [Vitis vinifera]                           | 47.258 | 9.5773 | 16.5 | 8  | 11 | 8  | 1.056 | 1.116 | 1.071 | 0.878 | 0.891 | 0.921 | 0.829 | 1.02E-03 |
| cds.Camellia_sinensis.comp29085_c0_seq1_m.49093 | PREDICT ED: 10 kDa chaperonin -like [Sesamum indicum]                                       | 13.338 | 57.867 | 54.9 | 7  | 23 | 7  | 1.023 | 0.996 | 0.996 | 0.953 | 0.998 | 1.028 | 0.988 | 6.29E-01 |





|                                                  |                                                                                                  |        |        |      |   |    |   |       |       |       |       |       |       |       |          |
|--------------------------------------------------|--------------------------------------------------------------------------------------------------|--------|--------|------|---|----|---|-------|-------|-------|-------|-------|-------|-------|----------|
| cds.Camellia_sinensis.comp2912_2_c0_seq1_m.32494 | PREDICT<br>ED: bark storage protein A-like<br>[Juglans regia]                                    | 36.404 | 3.7657 | 4.2  | 1 | 1  | 1 | 0.887 | 1.31  | 1.103 | 0.882 | 0.898 | 0.913 | 0.816 | 2.34E-01 |
| cds.Camellia_sinensis.comp2912_4_c0_seq1_m.29557 | PREDICT<br>ED: PI-PLC X domain-containing protein<br>At5g67130 [Arachis duranensis]              | 41.926 | 1.7781 | 4.4  | 2 | 2  | 2 | 0.945 | 1.06  | 0.979 | 1.076 | 0.975 | 0.984 | 1.017 | 7.30E-01 |
| cds.Camellia_sinensis.comp2912_7_c0_seq2_m.27072 | PREDICT<br>ED:<br>pyruvate dehydrogenase E1 component subunit beta-2, mitochondrial<br>[Setaria] | 18.566 | 34.233 | 49.4 | 8 | 21 | 5 | 0.991 | 1.049 | 1.002 | 0.998 | 0.968 | 0.999 | 0.975 | 2.77E-01 |
| cds.Camellia_sinensis.comp2912_8_c0_seq1_m.17628 | PREDICT<br>ED:<br>homeobox protein knotted-1-like 13 isoform X3 [Vitis vinifera]                 | 34.562 | 3.8194 | 5.9  | 2 | 2  | 2 | 1.071 | 1.169 | 1.038 | 1.023 | 0.853 | 0.833 | 0.826 | 5.90E-02 |



|                                                  |                                                                                    |        |        |      |   |    |   |       |       |       |       |       |       |       |          |
|--------------------------------------------------|------------------------------------------------------------------------------------|--------|--------|------|---|----|---|-------|-------|-------|-------|-------|-------|-------|----------|
|                                                  | PREDICT<br>ED:                                                                     |        |        |      |   |    |   |       |       |       |       |       |       |       |          |
| cds.Camellia_sinensis.comp2913_1_c0_seq1_m.37347 | photosynthetic NDH subunit of luminal location 4, chloroplastic [Vitis vinifera]   | 25.654 | 33.935 | 26.7 | 5 | 10 | 5 | 0.929 | 1.018 | 1.048 | 0.949 | 0.979 | 1.073 | 1.002 | 9.72E-01 |
|                                                  | PREDICT<br>ED:                                                                     |        |        |      |   |    |   |       |       |       |       |       |       |       |          |
| cds.Camellia_sinensis.comp2913_2_c0_seq2_m.16512 | molybdopterin biosynthesis protein CNX1 [Jatropha curcas]                          | 52.017 | 41.384 | 9.2  | 4 | 6  | 4 | 0.975 | 0.933 | 0.92  | 1.051 | 1.043 | 1.1   | 1.129 | 7.24E-03 |
|                                                  | PREDICT<br>ED: UDP-glucuronic acid decarboxylase 2 [Theobroma cacao] Mitochondrial |        |        |      |   |    |   |       |       |       |       |       |       |       |          |
| cds.Camellia_sinensis.comp2913_6_c0_seq1_m.23393 | acid decarboxylase 2 [Theobroma cacao] Mitochondrial                               | 48.526 | 6.7826 | 13.7 | 6 | 9  | 4 | 0.921 | 1.08  | 1.061 | 1.062 | 0.997 | 0.899 | 0.966 | 6.49E-01 |
|                                                  | PREDICT<br>ED:                                                                     |        |        |      |   |    |   |       |       |       |       |       |       |       |          |
| cds.Camellia_sinensis.comp2914_3_c0_seq1_m.17411 | metalloendopeptidase OMA1 [Morus notabilis]                                        | 50.212 | 1.2386 | 1.8  | 1 | 2  | 1 | 0.926 | 1.027 | 0.984 | 1.021 | 1.021 | 1.041 | 1.05  | 1.83E-01 |



|                                                  |                                                                                                        |        |        |      |   |    |   |       |       |       |       |       |       |       |          |
|--------------------------------------------------|--------------------------------------------------------------------------------------------------------|--------|--------|------|---|----|---|-------|-------|-------|-------|-------|-------|-------|----------|
| cds.Camellia_sinensis.comp2915_5_c0_seq1_m.33111 | transmembrane protein, putative [Medicago truncatula] ATP-dependent Clp protease proteolytic subunit 5 | 32.567 | 8.9467 | 5.8  | 1 | 2  | 1 | 0.909 | 1.012 | 0.986 | 1.008 | 1.192 | 0.923 | 1.074 | 4.58E-01 |
| cds.Camellia_sinensis.comp2915_6_c0_seq1_m.32125 | [Morus notabilis] PREDICTED: stearoyl-[acyl-carrier-protein] 9-desaturase, chloroplastic               | 38.3   | 35.914 | 21.1 | 6 | 15 | 6 | 0.943 | 0.979 | 0.945 | 1.063 | 1.05  | 1.01  | 1.089 | 1.21E-02 |
| cds.Camellia_sinensis.comp2915_8_c0_seq1_m.36360 | [Theobroma cacao] PREDICTED: stearoyl-[acyl-carrier-protein] 9-desaturase, chloroplastic isoform X2    | 40.653 | 34.636 | 16   | 5 | 5  | 5 | 0.917 | 0.937 | 0.971 | 1.104 | 1.031 | 1.056 | 1.13  | 9.54E-03 |
| cds.Camellia_sinensis.comp2915_8_c0_seq2_m.57673 | [Nelumbo nucifera]                                                                                     | 12.895 | 15.905 | 23.9 | 2 | 2  | 2 | 0.974 | 1.033 | 0.91  | 1.057 | 1.049 | 0.996 | 1.063 | 2.03E-01 |



|                                                 |                                                                                                     |        |        |      |    |    |    |       |       |       |       |       |       |       |          |
|-------------------------------------------------|-----------------------------------------------------------------------------------------------------|--------|--------|------|----|----|----|-------|-------|-------|-------|-------|-------|-------|----------|
| cds.Camellia_sinensis.comp29172_c0_seq2_m.27857 | PREDICTED: protein FAR1-RELATED SEQUENCE 9 [Vitis]                                                  | 46.018 | 9.647  | 6.3  | 2  | 2  | 2  | 0.926 | 0.978 | 0.965 | 1.136 | 0.965 | 1.061 | 1.102 | 1.30E-01 |
| cds.Camellia_sinensis.comp29174_c0_seq1_m.31554 | PREDICTED: RNA-binding protein CP29B, chloroplastic [Vitis vinifera]                                | 37.304 | 54.173 | 19.5 | 6  | 11 | 6  | 1.104 | 1.089 | 1.115 | 0.92  | 0.911 | 0.865 | 0.815 | 5.41E-04 |
| cds.Camellia_sinensis.comp29178_c0_seq1_m.22814 | PREDICTED: thiosulfate /3-mercaptopyruvate sulfurtransferase 1, mitochondrial isoform X1 [Jatropha] | 41.559 | 95.763 | 38.3 | 12 | 27 | 12 | 0.948 | 0.96  | 0.974 | 1.029 | 1.071 | 1.031 | 1.086 | 5.52E-03 |
| cds.Camellia_sinensis.comp29182_c0_seq1_m.10746 | PREDICTED: elongation factor G-1, mitochondrial [Theobroma cacao]                                   | 84.612 | 2.5142 | 2.2  | 2  | 2  | 2  | 0.913 | 1.02  | 0.928 | 1.044 | 1.146 | 0.979 | 1.108 | 1.52E-01 |

|                                                  |                                                                                                                                                                                                                                                                                                                    |        |        |      |   |    |   |       |       |       |       |       |       |       |          |
|--------------------------------------------------|--------------------------------------------------------------------------------------------------------------------------------------------------------------------------------------------------------------------------------------------------------------------------------------------------------------------|--------|--------|------|---|----|---|-------|-------|-------|-------|-------|-------|-------|----------|
| cds.Camellia_sinensis.comp2918_4_c0_seq2_m.31750 | PH-response transcript on factor [Arabidopsis thaliana] PREDICTED: AP-4 complex subunit mu isoform X1 [Daucus carota subsp. sativus] PREDICTED: spermidine synthase 1 [Citrus sinensis] PREDICTED: spermidine synthase [Theobroma cacao] PREDICTED: superoxide dismutase [Mn], mitochondrial [Nicotiana attenuata] | 38.237 | 18.251 | 15.7 | 5 | 8  | 5 | 0.951 | 0.991 | 0.977 | 0.991 | 0.997 | 1.1   | 1.058 | 1.99E-01 |
| cds.Camellia_sinensis.comp2918_6_c0_seq1_m.24270 |                                                                                                                                                                                                                                                                                                                    | 52.844 | 5.2092 | 7.6  | 3 | 4  | 3 | 0.968 | 1.034 | 1.01  | 1.108 | 0.926 | 0.973 | 0.998 | 9.45E-01 |
| cds.Camellia_sinensis.comp2918_8_c0_seq1_m.28848 |                                                                                                                                                                                                                                                                                                                    | 39.312 | 25.797 | 11.5 | 3 | 5  | 2 | 0.958 | 1.054 | 1.062 | 0.997 | 0.962 | 1.108 | 0.998 | 9.58E-01 |
| cds.Camellia_sinensis.comp2918_8_c0_seq2_m.30395 |                                                                                                                                                                                                                                                                                                                    | 39.351 | 4.1685 | 6.7  | 2 | 3  | 1 | 1.044 | 1.095 | 1.039 | 0.947 | 0.991 | 0.877 | 0.886 | 3.61E-02 |
| cds.Camellia_sinensis.comp2918_9_c0_seq1_m.26715 |                                                                                                                                                                                                                                                                                                                    | 25.54  | 66.201 | 33.9 | 7 | 37 | 7 | 0.991 | 0.945 | 0.942 | 1.024 | 1.046 | 1.041 | 1.081 | 1.14E-02 |



|                                                  |                                                                                    |        |        |      |    |    |   |       |       |       |       |       |       |       |          |
|--------------------------------------------------|------------------------------------------------------------------------------------|--------|--------|------|----|----|---|-------|-------|-------|-------|-------|-------|-------|----------|
| cds.Camellia_sinensis.comp2922_1_c0_seq1_m.35565 | PREDICTED: trigger factor-like [Phoenix dactylifera]                               | 24.688 | 59.672 | 26.9 | 6  | 12 | 6 | 1.036 | 1.028 | 1.079 | 0.953 | 0.94  | 0.939 | 0.901 | 2.72E-03 |
| cds.Camellia_sinensis.comp2922_3_c0_seq1_m.29121 | PREDICTED: UDP-glucuronic acid decarboxylase 6 [Nelumbo nucifera]                  | 38.379 | 50.808 | 33.2 | 11 | 21 | 6 | 1.011 | 0.964 | 0.973 | 1.015 | 1.074 | 1.013 | 1.052 | 1.03E-01 |
| cds.Camellia_sinensis.comp2922_3_c0_seq2_m.37257 | PREDICTED: UDP-glucuronic acid decarboxylase 6 [Arachis ipaensis]                  | 28.743 | 1.2219 | 20.1 | 6  | 10 | 1 |       |       |       |       |       |       |       |          |
| cds.Camellia_sinensis.comp2922_6_c0_seq2_m.38445 | PREDICTED: endo-1,3;1,4-beta-D-glucanase-like, partial [Nicotiana tomentosiformis] | 18.239 | 8.7447 | 12.2 | 2  | 3  | 2 | 1.075 | 0.946 | 1.011 | 0.996 | 0.983 | 0.989 | 0.979 | 6.44E-01 |



|                                                  |                                                                                |        |        |      |   |    |   |       |       |       |       |       |       |       |          |
|--------------------------------------------------|--------------------------------------------------------------------------------|--------|--------|------|---|----|---|-------|-------|-------|-------|-------|-------|-------|----------|
| cds.Camellia_sinensis.comp2923_8_c0_seq1_m.38345 | PREDICTED: CBS domain-containing protein CBSX3, mitochondrial [Vitis vinifera] | 22.649 | 35.65  | 50.7 | 9 | 24 | 9 | 0.949 | 0.994 | 0.993 | 1.027 | 1.03  | 1.02  | 1.048 | 3.87E-02 |
| cds.Camellia_sinensis.comp2923_9_c0_seq1_m.40043 | PREDICTED: probable carboxylesterase 2 [Vitis vinifera]                        | 19.798 | 4.2994 | 18.5 | 3 | 6  | 0 |       |       |       |       |       |       |       |          |
| cds.Camellia_sinensis.comp2923_9_c0_seq2_m.40683 | PREDICTED: probable carboxylesterase 2 [Vitis vinifera]                        | 20.772 | 42.738 | 27   | 5 | 10 | 3 | 0.987 | 0.943 | 0.919 | 1.063 | 1.053 | 1.048 | 1.111 | 7.78E-03 |
| cds.Camellia_sinensis.comp2923_9_c0_seq3_m.41918 | PREDICTED: probable carboxylesterase 2 [Vitis vinifera]                        | 28.937 | 2.1282 | 14.8 | 3 | 5  | 1 |       |       |       |       |       |       |       |          |
| cds.Camellia_sinensis.comp2924_2_c0_seq1_m.33354 | Thylakoid lumenal 19 kDa protein [Morus notabilis]                             | 27.926 | 50.819 | 16.2 | 6 | 15 | 6 | 1.013 | 0.992 | 0.972 | 1.011 | 1.027 | 0.997 | 1.019 | 2.58E-01 |

|                       |                                                                                                                                          |        |        |      |    |    |    |       |       |       |       |       |       |       |          |
|-----------------------|------------------------------------------------------------------------------------------------------------------------------------------|--------|--------|------|----|----|----|-------|-------|-------|-------|-------|-------|-------|----------|
| cds.Camellia_sinensis | PREDICT<br>ED:<br>alcohol dehydrogenase-like<br>[Nicotiana tabacum]                                                                      | 47.038 | 152.2  | 23.6 | 8  | 16 | 8  | 0.984 | 0.97  | 0.984 | 1.028 | 1.032 | 1.019 | 1.048 | 1.52E-03 |
| cds.Camellia_sinensis | PREDICT<br>ED:<br>probable mitochondrial<br>saccharophosphate dehydrogenase-like oxidoreductase<br>At5g39410 isoform XI[Jatropha curcas] | 48.98  | 12.16  | 13.4 | 5  | 5  | 5  | 1.015 | 1.048 | 1.039 | 0.906 | 0.983 | 1.006 | 0.933 | 1.02E-01 |
| cds.Camellia_sinensis | PREDICT<br>ED:<br>NAD(P)H-quinone oxidoreductase subunit N, chloroplastic-like<br>[Nicotiana tabacum]                                    | 19.834 | 4.0794 | 21.5 | 4  | 4  | 4  | 0.953 | 1.026 | 1.036 | 0.981 | 1.102 | 0.918 | 0.995 | 9.14E-01 |
| cds.Camellia_sinensis | PREDICT<br>ED:<br>alanine--tRNA ligase<br>[Vitis vinifera]                                                                               | 112.52 | 207.71 | 28.2 | 28 | 53 | 28 | 0.985 | 0.982 | 0.975 | 1.006 | 1.014 | 1.037 | 1.039 | 1.62E-02 |

|                                                  |                                                                                                                             |        |        |      |    |    |    |       |       |       |       |       |       |       |          |
|--------------------------------------------------|-----------------------------------------------------------------------------------------------------------------------------|--------|--------|------|----|----|----|-------|-------|-------|-------|-------|-------|-------|----------|
|                                                  | PREDICT<br>ED:                                                                                                              |        |        |      |    |    |    |       |       |       |       |       |       |       |          |
| cds.Camellia_sinensis.comp2925_8_c0_seq1_m.43491 | universal stress protein PHOS32 [Pyrus x bretschneider] Dehydration-responsive protein RD22 precursor [Populus trichocarpa] | 18.455 | 2.5107 | 18.3 | 4  | 6  | 3  | 0.969 | 0.98  | 0.975 | 1.043 | 1.046 | 1.007 | 1.059 | 1.07E-02 |
| cds.Camellia_sinensis.comp2926_6_c0_seq1_m.27706 | responsive protein RD22 precursor [Populus trichocarpa]                                                                     | 12.51  | 42.2   | 31.7 | 5  | 7  | 5  | 1.259 | 1.173 | 1.193 | 0.721 | 0.8   | 0.794 | 0.639 | 3.44E-04 |
| cds.Camellia_sinensis.comp2926_6_c0_seq2_m.32997 | PREDICT ED: BURP domain protein RD22-like, partial [Juglans regia]                                                          | 22.294 | 8.7869 | 16.2 | 4  | 4  | 4  | 1.34  | 1.282 | 1.299 | 0.638 | 0.669 | 0.656 | 0.501 | 1.70E-06 |
| cds.Camellia_sinensis.comp2927_0_c0_seq2_m.14589 | PREDICT ED: glucose-6-phosphate isomerase 1, chloroplastic [Ziziphus jujuba]                                                | 68.855 | 197.81 | 49.4 | 29 | 45 | 29 | 1.003 | 0.997 | 1.025 | 0.991 | 0.995 | 1.002 | 0.988 | 2.46E-01 |

|                                                 |                                                                                               |        |        |      |    |    |    |       |       |       |       |       |       |       |          |
|-------------------------------------------------|-----------------------------------------------------------------------------------------------|--------|--------|------|----|----|----|-------|-------|-------|-------|-------|-------|-------|----------|
| cds.Camellia_sinensis.comp29274_c0_seq1_m.16753 | PREDICTED:<br>succinate-semialdehyde dehydrogenase, mitochondrial [Prunus]                    | 56.659 | 64.941 | 28.6 | 15 | 32 | 15 | 0.945 | 0.964 | 0.953 | 1.072 | 1.075 | 1.047 | 1.116 | 4.19E-04 |
| cds.Camellia_sinensis.comp29282_c0_seq1_m.45480 | PREDICTED:<br>heparanase-like protein 3 [Vitis vinifera]                                      | 22.451 | 4.1598 | 9    | 2  | 3  | 2  | 1.016 | 1.053 | 1.041 | 1.041 | 0.919 | 0.933 | 0.93  | 1.44E-01 |
| cds.Camellia_sinensis.comp29286_c0_seq2_m.25516 | alpha/beta fold hydrolase [Medicago truncatula]                                               | 41.881 | 29.689 | 17.3 | 6  | 8  | 6  | 1.008 | 0.977 | 1.007 | 0.999 | 1.025 | 0.997 | 1.01  | 5.16E-01 |
| cds.Camellia_sinensis.comp29287_c0_seq6_m.49241 | lysine N-methyltransferase [Arabidopsis thaliana]                                             | 14.982 | 1.9029 | 7.2  | 1  | 1  | 1  |       |       |       |       |       |       |       |          |
| cds.Camellia_sinensis.comp29290_c0_seq2_m.14601 | PREDICTED:<br>serine/threonine-protein kinase STN8, chloroplastic isoform X1 [Vitis vinifera] | 57.13  | 47.976 | 20.2 | 10 | 10 | 10 | 0.98  | 1.004 | 1.005 | 1.035 | 1.006 | 0.998 | 1.017 | 2.96E-01 |

|                                                  |                                                                                 |        |        |      |   |    |   |       |       |       |       |       |       |       |          |
|--------------------------------------------------|---------------------------------------------------------------------------------|--------|--------|------|---|----|---|-------|-------|-------|-------|-------|-------|-------|----------|
| cds.Camellia_sinensis.comp2929_2_c0_seq4_m.36482 | PREDICTED:<br>TATA-box-binding protein-like<br>[Nicotiana tabacum]              | 28.745 | 1.4681 | 4    | 1 | 4  | 1 | 1.088 | 1.087 | 1.061 | 0.93  | 0.914 | 0.948 | 0.863 | 3.82E-04 |
| cds.Camellia_sinensis.comp2929_5_c0_seq1_m.32773 | PREDICTED:<br>phosphoglucan phosphatase DSP4, amyloplastic<br>[Ziziphus jujuba] | 22.498 | 6.0198 | 19.6 | 3 | 3  | 2 |       |       |       |       |       |       |       |          |
| cds.Camellia_sinensis.comp2929_7_c0_seq2_m.16897 | PREDICTED:<br>NEDD8 ultimate buster 1<br>[Solanum tuberosum]                    | 61.841 | 12.847 | 10.9 | 6 | 8  | 6 | 1.03  | 0.998 | 1.02  | 0.97  | 1.028 | 0.997 | 0.983 | 4.08E-01 |
| cds.Camellia_sinensis.comp2929_7_c0_seq3_m.18716 | PREDICTED:<br>aspartic proteinase<br>[Vitis vinifera] 26S                       | 58.91  | 11.975 | 9.1  | 5 | 7  | 5 | 0.952 | 0.965 | 0.924 | 1.043 | 1.054 | 1.045 | 1.106 | 1.58E-03 |
| cds.Camellia_sinensis.comp2929_9_c0_seq1_m.33168 | protease regulatory subunit 6B-like protein<br>[Morus notabilis]                | 38.558 | 5.1123 | 22.4 | 9 | 14 | 2 | 0.906 | 1.043 | 1.051 | 1.017 | 0.966 | 1.037 | 1.007 | 8.80E-01 |

|                                                  |                                                                           |        |        |      |    |    |    |       |       |       |       |       |       |       |          |
|--------------------------------------------------|---------------------------------------------------------------------------|--------|--------|------|----|----|----|-------|-------|-------|-------|-------|-------|-------|----------|
| cds.Camellia_sinensis.comp2930_1_c0_seq1_m.28275 | RNA binding protein [Arabidopsis thaliana] PREDICTED:                     | 45.52  | 6.8912 | 6.6  | 2  | 2  | 2  |       |       |       |       |       |       |       |          |
| cds.Camellia_sinensis.comp2930_7_c0_seq1_m.11343 | protein SIEVE ELEMENT OCCLUSION B [Ricinus communis] PREDICTED:           | 48.293 | 53.183 | 32.4 | 14 | 20 | 14 | 0.944 | 0.996 | 0.994 | 1.049 | 1.027 | 1.033 | 1.06  | 3.55E-02 |
| cds.Camellia_sinensis.comp2930_7_c0_seq1_m.11344 | protein SIEVE ELEMENT OCCLUSION B [Ricinus communis] PREDICTED:           | 35.78  | 34.291 | 25.2 | 6  | 9  | 6  | 0.951 | 0.944 | 0.977 | 1.085 | 1.101 | 1.024 | 1.118 | 1.06E-02 |
| cds.Camellia_sinensis.comp2930_8_c0_seq2_m.24888 | manganese-dependent ADP-ribose/CDP-alcohol diphosphatase [Vitis vinifera] | 35.925 | 3.4379 | 9.4  | 3  | 3  | 3  | 0.896 | 1.026 | 0.992 | 1.033 | 0.995 | 1.082 | 1.067 | 2.35E-01 |



|                                                 |                                                                                                 |        |        |      |    |    |    |       |       |       |       |       |       |       |          |
|-------------------------------------------------|-------------------------------------------------------------------------------------------------|--------|--------|------|----|----|----|-------|-------|-------|-------|-------|-------|-------|----------|
| cds.Camellia_sinensis.comp29357_c0_seq1_m.14976 | PREDICTED:<br>asparagine--tRNA ligase,<br>cytoplasmic 1 [Vitis vinifera]                        | 63.182 | 123.47 | 24.7 | 14 | 31 | 12 | 0.943 | 0.976 | 0.961 | 1.08  | 1.03  | 1.035 | 1.092 | 8.22E-03 |
| cds.Camellia_sinensis.comp29358_c0_seq1_m.36435 | PREDICTED:<br>60S ribosomal protein L9 [Cucumis melo]                                           | 23.154 | 78.166 | 54.2 | 10 | 22 | 10 | 1.197 | 1.165 | 1.142 | 0.8   | 0.856 | 0.83  | 0.709 | 1.37E-04 |
| cds.Camellia_sinensis.comp29362_c0_seq2_m.33302 | PREDICTED:<br>bifunctional phosphatase IMPL2, chloroplastic-like isoform X1 [Nicotiana tabacum] | 37.645 | 38.799 | 12.9 | 3  | 5  | 3  | 0.922 | 0.963 | 1.034 | 1.094 | 0.996 | 0.977 | 1.051 | 3.65E-01 |
| cds.Camellia_sinensis.comp29363_c0_seq1_m.13525 | PREDICTED:<br>pentatricopeptide repeat-containing protein At2g15690 [Solanum lycopersic         | 74.623 | 3.3549 | 3.6  | 2  | 2  | 1  | 0.983 | 1.027 | 1.037 | 0.948 | 0.952 | 1.056 | 0.97  | 4.66E-01 |



|                                                  |                                                                                |        |        |      |    |    |    |       |       |       |       |       |       |       |          |
|--------------------------------------------------|--------------------------------------------------------------------------------|--------|--------|------|----|----|----|-------|-------|-------|-------|-------|-------|-------|----------|
| cds.Camellia_sinensis.comp2936_3_c0_seq2_m.22606 | PREDICT ED: pentatricopeptide repeat-containing protein At2g15690-like [Vitis] | 53.849 | 8.2248 | 6.5  | 3  | 3  | 2  | 0.956 | 1.017 | 1.102 | 0.918 | 0.838 | 1.167 | 0.951 | 6.11E-01 |
| cds.Camellia_sinensis.comp2936_4_c0_seq1_m.23336 | PREDICT ED: tyrosine aminotransferase-like [Nicotiana attenuata]               | 46.995 | 38.035 | 17.1 | 7  | 9  | 7  | 1.101 | 1.111 | 1.143 | 0.87  | 0.889 | 0.879 | 0.786 | 4.43E-05 |
| cds.Camellia_sinensis.comp2936_5_c0_seq1_m.8543  | PREDICT ED: probable beta-D-xylosidase 7 isoform X2 [Theobroma cacao]          | 85.647 | 15.054 | 11   | 8  | 9  | 8  | 1.008 | 1.011 | 1.022 | 1.036 | 0.961 | 0.964 | 0.974 | 3.35E-01 |
| cds.Camellia_sinensis.comp2936_6_c0_seq1_m.9691  | PREDICT ED: WEB family protein At5g55860 [Vitis vinifera]                      | 71.843 | 33.42  | 18.7 | 12 | 13 | 12 | 0.95  | 0.994 | 0.991 | 0.966 | 1.055 | 1.021 | 1.036 | 2.98E-01 |

|                                                  |                                                                                    |        |        |      |   |   |   |       |       |       |       |       |       |       |          |
|--------------------------------------------------|------------------------------------------------------------------------------------|--------|--------|------|---|---|---|-------|-------|-------|-------|-------|-------|-------|----------|
|                                                  | PREDICT<br>ED:                                                                     |        |        |      |   |   |   |       |       |       |       |       |       |       |          |
| cds.Camellia_sinensis.comp2937_0_c0_seq2_m.43077 | probable xyloglucan endotransglucosylase/hydrolase protein 23 [Vitis vinifera]     | 25.9   | 23.438 | 21.6 | 4 | 5 | 3 | 0.809 | 0.877 | 0.874 | 1.182 | 1.085 | 1.234 | 1.368 | 2.48E-03 |
|                                                  | PREDICT<br>ED:                                                                     |        |        |      |   |   |   |       |       |       |       |       |       |       |          |
| cds.Camellia_sinensis.comp2937_1_c0_seq1_m.7891  | phospholipid:diacylglycerol acyltransferase 1-like [Jatropha curcas]               | 74.118 | 25.569 | 5.4  | 4 | 5 | 4 | 0.974 | 0.907 | 1.005 | 0.988 | 1.062 | 1.082 | 1.085 | 1.17E-01 |
|                                                  | PREDICT<br>ED:                                                                     |        |        |      |   |   |   |       |       |       |       |       |       |       |          |
| cds.Camellia_sinensis.comp2937_3_c0_seq2_m.37564 | vacuolar protein-sorting-associated protein 37 homolog 1-like [Gossypium hirsutum] | 29.518 | 5.9198 | 12.9 | 4 | 8 | 4 | 1.028 | 0.998 | 0.977 | 0.995 | 0.964 | 1.053 | 1.003 | 9.36E-01 |

|                                                 |                                                                                            |        |        |      |    |    |    |       |       |       |       |       |       |       |          |
|-------------------------------------------------|--------------------------------------------------------------------------------------------|--------|--------|------|----|----|----|-------|-------|-------|-------|-------|-------|-------|----------|
| cds.Camellia_sinensis.comp29378_c0_seq1_m.36536 | PREDICTED:<br>mitochondrial outer membrane import complex protein METAXIN [Vitis vinifera] | 38.229 | 2.5981 | 5.3  | 2  | 2  | 2  | 0.982 | 1.057 | 1.013 | 0.999 | 0.953 | 1.004 | 0.969 | 3.05E-01 |
| cds.Camellia_sinensis.comp29380_c0_seq1_m.39114 | PITH domain-containing protein [Morus notabilis]                                           | 20.83  | 18.845 | 11.2 | 2  | 4  | 2  | 0.936 | 0.991 | 0.978 | 1.054 | 1.035 | 1.073 | 1.088 | 1.35E-02 |
| cds.Camellia_sinensis.comp29387_c0_seq1_m.10368 | PREDICTED:<br>acyltransferase-like protein At3g26840, chloroplastic [Vitis vinifera]       | 70.567 | 2.2824 | 4    | 2  | 2  | 2  |       |       |       |       |       |       |       |          |
| cds.Camellia_sinensis.comp29390_c0_seq1_m.22240 | PREDICTED:<br>linolenate hydroperoxidase, chloroplastic [Fragaria vesca subsp. vesca]      | 54.807 | 56.694 | 22.6 | 11 | 20 | 11 | 1.006 | 0.977 | 0.962 | 1.044 | 1.03  | 1.014 | 1.049 | 3.81E-02 |

|                                                  |                                                                                                      |        |        |      |    |    |    |       |       |       |       |       |       |       |          |
|--------------------------------------------------|------------------------------------------------------------------------------------------------------|--------|--------|------|----|----|----|-------|-------|-------|-------|-------|-------|-------|----------|
| cds.Camellia_sinensis.comp2939_2_c1_seq2_m.18187 | PREDICT<br>ED: dnaJ<br>protein<br>ERDJ3B<br>[Nelumbo<br>nucifera]                                    | 38.646 | 10.358 | 16.6 | 4  | 6  | 4  | 1.097 | 1.028 | 1.036 | 0.948 | 0.953 | 0.907 | 0.888 | 1.02E-02 |
| cds.Camellia_sinensis.comp2939_4_c0_seq1_m.5515  | PREDICT<br>ED:<br>protein<br>TIC110,<br>chloroplast<br>ic isoform<br>X1 [Vitis<br>vinifera]          | 69.71  | 143.18 | 33.4 | 18 | 35 | 18 | 0.995 | 1.017 | 1.014 | 0.995 | 0.992 | 1.004 | 0.988 | 2.09E-01 |
| cds.Camellia_sinensis.comp2939_4_c0_seq1_m.5516  | PREDICT<br>ED:<br>protein<br>TIC110,<br>chloroplast<br>ic-like,<br>partial<br>[Nicotiana<br>tabacum] | 24.176 | 45.791 | 38.8 | 9  | 17 | 9  | 1     | 1.001 | 1.013 | 0.968 | 1.007 | 0.966 | 0.976 | 1.56E-01 |
| cds.Camellia_sinensis.comp2939_4_c0_seq1_m.5517  | PREDICT<br>ED:<br>protein<br>TIC110,<br>chloroplast<br>ic, partial<br>[Ziziphus<br>jujuba]           | 22.297 | 90.416 | 42   | 6  | 23 | 6  | 1.001 | 1.011 | 1.008 | 0.994 | 0.99  | 0.991 | 0.985 | 9.24E-03 |



|                                |                   |                                                                            |        |        |      |    |    |    |       |       |       |       |       |       |       |          |
|--------------------------------|-------------------|----------------------------------------------------------------------------|--------|--------|------|----|----|----|-------|-------|-------|-------|-------|-------|-------|----------|
| cds.Camellia_sinensis.comp2940 | 3_c0_seq1_m.1874  | PREDICTED:<br>sucrose synthase [Nicotiana tabacum]                         | 92.452 | 93.255 | 23.2 | 18 | 25 | 15 | 1.152 | 1.168 | 1.246 | 0.763 | 0.812 | 0.824 | 0.673 | 3.01E-04 |
| cds.Camellia_sinensis.comp2941 | 7_c0_seq1_m.27919 | uncharacterized oxidoreductase At4g09670-like [Nicotiana tomentosiformis]  | 44.582 | 27.988 | 19.3 | 8  | 16 | 8  | 0.996 | 0.994 | 0.952 | 1.026 | 1.037 | 1.031 | 1.052 | 2.83E-02 |
| cds.Camellia_sinensis.comp2941 | 8_c0_seq4_m.30677 | PREDICTED: psbP domain-containing protein 3, chloroplastic [Juglans regia] | 27.62  | 56.251 | 25.5 | 5  | 14 | 5  | 1.02  | 0.995 | 0.968 | 0.983 | 1.016 | 1.029 | 1.015 | 5.02E-01 |
| cds.Camellia_sinensis.comp2942 | 0_c0_seq1_m.7741  | PREDICTED: aminopeptidase M1 [Vitis vinifera]                              | 94.411 | 200.73 | 28.1 | 25 | 44 | 24 | 0.901 | 0.913 | 0.924 | 1.114 | 1.077 | 1.099 | 1.202 | 1.17E-04 |
| cds.Camellia_sinensis.comp2942 | 1_c0_seq1_m.26499 | ornithine carbamoyltransferase, chloroplastic-like [Nicotiana tabacum]     | 43.985 | 67.068 | 25.9 | 8  | 19 | 5  | 0.992 | 0.956 | 1.017 | 1.03  | 1.111 | 0.947 | 1.041 | 4.77E-01 |

|                                                  |                                                                                              |        |        |      |    |    |    |       |       |       |       |       |       |       |          |
|--------------------------------------------------|----------------------------------------------------------------------------------------------|--------|--------|------|----|----|----|-------|-------|-------|-------|-------|-------|-------|----------|
| cds.Camellia_sinensis.comp2942_1_c0_seq2_m.27772 | PREDICT<br>ED:<br>ornithine carbamoyltransferase, chloroplastic [Vitis vinifera]             | 44.517 | 13.757 | 19.4 | 6  | 18 | 3  | 0.973 | 1.034 | 1.015 | 0.948 | 1.043 | 0.995 | 0.988 | 7.25E-01 |
| cds.Camellia_sinensis.comp2942_5_c0_seq1_m.27175 | PREDICT<br>ED: RNA pseudouridine synthase 7 [Capsicum annuum]                                | 12.561 | 8.0695 | 10.5 | 1  | 2  | 1  |       |       |       |       |       |       |       |          |
| cds.Camellia_sinensis.comp2942_6_c0_seq1_m.33534 | PREDICT<br>ED:<br>probable protein phosphatase 2C 26 [Juglans regia]                         | 34.317 | 3.5489 | 7.3  | 2  | 3  | 2  | 0.977 | 1.03  | 1.093 | 1.04  | 0.988 | 0.885 | 0.94  | 3.33E-01 |
| cds.Camellia_sinensis.comp2943_1_c0_seq1_m.26713 | PREDICT<br>ED:<br>ribosome maturation protein SBDS [Nelumbo nucifera]                        | 40.957 | 11.771 | 5.6  | 2  | 2  | 2  |       |       |       |       |       |       |       |          |
| cds.Camellia_sinensis.comp2943_2_c0_seq1_m.15335 | PREDICT<br>ED:<br>eukaryotic translation initiation factor 3 subunit D-like [Vitis vinifera] | 64.853 | 103.17 | 28.6 | 13 | 17 | 13 | 1.026 | 1.02  | 1.046 | 0.984 | 0.977 | 0.952 | 0.942 | 9.06E-03 |

|                                                 |                                                                                               |        |        |      |    |    |    |       |       |       |       |       |       |       |          |
|-------------------------------------------------|-----------------------------------------------------------------------------------------------|--------|--------|------|----|----|----|-------|-------|-------|-------|-------|-------|-------|----------|
| cds.Camellia_sinensis.comp29433_c0_seq1_m.8748  | PREDICTED:<br>aldehyde dehydrogenase family 2 member B4, mitochondrial-like [Ziziphus jujuba] | 58.352 | 289.89 | 37.4 | 21 | 66 | 11 | 1.036 | 1.001 | 1.027 | 0.968 | 0.964 | 0.969 | 0.947 | 3.47E-02 |
| cds.Camellia_sinensis.comp29440_c1_seq1_m.13529 | PREDICTED:<br>threonine synthase, chloroplastic [Sesamum indicum]                             | 59.995 | 113.27 | 23.2 | 12 | 23 | 8  | 0.993 | 0.97  | 0.996 | 1.029 | 1.007 | 1.038 | 1.039 | 3.62E-02 |
| cds.Camellia_sinensis.comp29442_c0_seq1_m.19625 | PREDICTED:<br>1-deoxy-D-xylulose 5-phosphate reductoisomerase, chloroplastic [Vitis vinifera] | 51.292 | 98.423 | 26.9 | 11 | 24 | 11 | 1.008 | 1.022 | 1.02  | 0.982 | 0.976 | 0.976 | 0.962 | 1.24E-03 |
| cds.Camellia_sinensis.comp29445_c0_seq1_m.25904 | PREDICTED:<br>E3 ubiquitin protein ligase RIE1 [Theobroma cacao]                              | 39.628 | 8.9173 | 8.7  | 3  | 4  | 3  | 0.943 | 0.949 | 1.016 | 1.066 | 1.056 | 0.996 | 1.072 | 9.41E-02 |



|                                                  |                                                                                    |        |        |      |   |    |   |       |       |       |       |       |       |       |          |
|--------------------------------------------------|------------------------------------------------------------------------------------|--------|--------|------|---|----|---|-------|-------|-------|-------|-------|-------|-------|----------|
| cds.Camellia_sinensis.comp2944_9_c0_seq1_m.26166 | PREDICT<br>ED: uracil phosphoribosyltransferase<br>[Nelumbo nucifera]              | 18.45  | 4.6448 | 18.9 | 4 | 5  | 4 | 0.995 | 1.014 | 0.99  | 1.003 | 0.994 | 1.017 | 1.005 | 6.39E-01 |
| cds.Camellia_sinensis.comp2945_3_c0_seq1_m.21413 | PREDICT<br>ED: ankyrin repeat domain-containing protein 2B-like<br>[Juglans regia] | 38.004 | 5.4048 | 27.8 | 9 | 13 | 3 | 1.054 | 0.981 | 1.013 | 0.989 | 0.994 | 0.982 | 0.973 | 2.66E-01 |
| cds.Camellia_sinensis.comp2945_3_c0_seq3_m.23364 | PREDICT<br>ED: ankyrin repeat domain-containing protein 2B-like<br>[Juglans regia] | 38.658 | 59.736 | 30.4 | 9 | 14 | 3 | 1.119 | 1.054 | 0.992 | 0.913 | 0.927 | 0.943 | 0.879 | 2.40E-02 |
| cds.Camellia_sinensis.comp2946_3_c0_seq5_m.41542 | PREDICT<br>ED: 14 kDa zinc-binding protein isoform X1<br>[Vitis vinifera]          | 23.522 | 9.0624 | 15   | 3 | 3  | 3 | 0.973 | 0.994 | 1.057 | 1.037 | 0.984 | 0.969 | 0.989 | 7.48E-01 |

|                                                  |                                                                                                    |        |        |      |   |    |   |       |       |       |       |       |       |       |          |
|--------------------------------------------------|----------------------------------------------------------------------------------------------------|--------|--------|------|---|----|---|-------|-------|-------|-------|-------|-------|-------|----------|
| cds.Camellia_sinensis.comp2946_6_c0_seq1_m.19012 | PREDICT<br>ED:<br>lysosomal<br>Pro-X<br>carboxypeptidase<br>[Jatropha curcas]                      | 50.937 | 51.538 | 16.3 | 7 | 13 | 7 | 1.038 | 1.026 | 1.038 | 0.969 | 0.938 | 0.983 | 0.932 | 7.88E-03 |
| cds.Camellia_sinensis.comp2946_9_c0_seq1_m.24379 | PREDICT<br>ED: D-xylose-proton symporter-like 2<br>[Jatropha curcas]                               | 53.585 | 2.0805 | 2    | 1 | 1  | 1 |       |       |       |       |       |       |       |          |
| cds.Camellia_sinensis.comp2946_9_c3_seq1_m.33264 | integral membrane protein<br>[Medicago truncatula]                                                 | 31.598 | 8.1923 | 4.8  | 2 | 2  | 2 | 0.906 | 0.954 | 1.01  | 1.051 | 1.09  | 1.02  | 1.101 | 5.74E-02 |
| cds.Camellia_sinensis.comp2947_0_c0_seq1_m.43811 | PREDICT<br>ED: 17.3 kDa class I heat shock protein-like<br>[Nelumbo nucifera]                      | 18.121 | 7.5093 | 28.3 | 5 | 7  | 3 | 1.459 | 1.406 | 1.484 | 0.488 | 0.5   | 0.509 | 0.344 | 3.76E-07 |
| cds.Camellia_sinensis.comp2947_2_c0_seq1_m.25608 | PREDICT<br>ED: cell division protein FtsY homolog, chloroplastic<br>[Daucus carota subsp. sativus] | 39.021 | 46.233 | 28.3 | 9 | 16 | 9 | 1.019 | 1.053 | 1.025 | 0.966 | 0.979 | 0.956 | 0.937 | 5.92E-03 |

|                                                  |                                                                                           |        |        |      |    |    |    |       |       |       |       |       |       |       |          |
|--------------------------------------------------|-------------------------------------------------------------------------------------------|--------|--------|------|----|----|----|-------|-------|-------|-------|-------|-------|-------|----------|
| cds.Camellia_sinensis.comp2947_4_c0_seq1_m.21700 | PREDICTED:<br>dihydropyrimidine dehydrogenase (NADP(+)), chloroplastic [Ziziphus jujuba]  | 46.268 | 31.135 | 30.1 | 12 | 17 | 12 | 0.987 | 1.003 | 0.972 | 1.003 | 1.013 | 1.039 | 1.031 | 8.99E-02 |
| cds.Camellia_sinensis.comp2947_7_c0_seq1_m.30956 | thiol-disulfide oxidoreductase DCC [Medicago truncatula]<br>PREDICTED:                    | 25.573 | 7.1022 | 8.9  | 2  | 3  | 2  | 0.944 | 0.935 | 0.963 | 1.095 | 1.068 | 1.042 | 1.128 | 2.00E-03 |
| cds.Camellia_sinensis.comp2948_5_c0_seq1_m.3324  | phosphoglucan, water dikinase, chloroplastic isoform X1 [Vitis vinifera]<br>chloroplastic | 132.97 | 225.44 | 32.9 | 33 | 52 | 33 | 1.207 | 1.184 | 1.213 | 0.777 | 0.775 | 0.78  | 0.647 | 2.80E-07 |
| cds.Camellia_sinensis.comp2949_1_c0_seq1_m.18947 | cystathionine beta lyase family protein [Populus trichocarpa]                             | 50.257 | 25.197 | 11.4 | 5  | 7  | 5  | 1.006 | 1.019 | 1.026 | 1.004 | 0.963 | 0.975 | 0.964 | 5.55E-02 |



|                                                 |                                                                                           |        |        |      |    |    |    |       |       |       |       |       |       |       |          |
|-------------------------------------------------|-------------------------------------------------------------------------------------------|--------|--------|------|----|----|----|-------|-------|-------|-------|-------|-------|-------|----------|
| cds.Camellia_sinensis.comp29513_c0_seq1_m.28159 | PREDICTED:<br>phosphoribosylglycinamide formyltransferase, chloroplastic [Vitis vinifera] | 33.875 | 55.246 | 9.2  | 2  | 3  | 2  | 0.894 | 1.083 | 0.987 | 1.044 | 0.991 | 1.024 | 1.032 | 5.82E-01 |
| cds.Camellia_sinensis.comp29516_c0_seq1_m.16444 | PREDICTED:<br>leucine aminopeptidase 1-like [Juglans regia]                               | 60.078 | 323.31 | 53.4 | 23 | 63 | 19 | 0.986 | 0.997 | 0.964 | 1.026 | 1.029 | 1.014 | 1.041 | 2.02E-02 |
| cds.Camellia_sinensis.comp29521_c0_seq1_m.22699 | PREDICTED:<br>ED: COP9 signalosome complex subunit 4 [Ricinus]                            | 45.004 | 32.308 | 21.7 | 8  | 11 | 8  | 0.978 | 0.939 | 1.005 | 1.055 | 1.017 | 0.965 | 1.039 | 3.04E-01 |
| cds.Camellia_sinensis.comp29523_c0_seq1_m.24971 | PREDICTED:<br>ED:<br>serine--glyoxylate aminotransferase [Capsicum annuum]                | 44.033 | 290.14 | 47.1 | 15 | 52 | 15 | 1.03  | 0.994 | 1.017 | 0.988 | 0.961 | 0.989 | 0.966 | 7.01E-02 |

|                                                  |                                                                                                      |        |        |      |    |    |    |       |       |       |       |       |       |       |          |
|--------------------------------------------------|------------------------------------------------------------------------------------------------------|--------|--------|------|----|----|----|-------|-------|-------|-------|-------|-------|-------|----------|
|                                                  | PREDICT<br>ED:<br>exosome<br>complex<br>component                                                    |        |        |      |    |    |    |       |       |       |       |       |       |       |          |
| cds.Camellia_sinensis.comp2952_7_c0_seq1_m.32348 | RRP41-like isoform X1<br>[Nelumbo nucifera]                                                          | 27.497 | 2.1137 | 4.7  | 1  | 1  | 1  | 0.971 | 1.026 | 1.086 | 1.014 | 0.975 | 0.938 | 0.949 | 2.62E-01 |
|                                                  | PREDICT<br>ED: 4-hydroxyphenylpyruvate dioxygenase<br>[Cucumis]                                      |        |        |      |    |    |    |       |       |       |       |       |       |       |          |
| cds.Camellia_sinensis.comp2953_2_c0_seq1_m.22729 | ED: 4-hydroxyphenylpyruvate dioxygenase<br>[Cucumis]                                                 | 50.965 | 11.36  | 10.2 | 4  | 4  | 4  | 0.979 | 1.005 | 1.014 | 0.99  | 0.992 | 1.022 | 1.002 | 8.98E-01 |
|                                                  | PREDICT<br>ED:<br>probable<br>plastid-lipid-associated protein 6, chloroplastic<br>[Theobroma cacao] |        |        |      |    |    |    |       |       |       |       |       |       |       |          |
| cds.Camellia_sinensis.comp2953_5_c0_seq1_m.38228 | ED:<br>probable<br>plastid-lipid-associated protein 6, chloroplastic<br>[Theobroma cacao]            | 29.197 | 159.72 | 40.7 | 10 | 42 | 10 | 0.922 | 0.91  | 0.911 | 1.071 | 1.119 | 1.083 | 1.193 | 2.18E-04 |
|                                                  | PREDICT<br>ED:<br>nucleoside diphosphate kinase 3-like<br>[Nicotiana tabacum]                        |        |        |      |    |    |    |       |       |       |       |       |       |       |          |
| cds.Camellia_sinensis.comp2953_5_c1_seq2_m.43556 | ED:<br>nucleoside diphosphate kinase 3-like<br>[Nicotiana tabacum]                                   | 25.9   | 25.72  | 16   | 5  | 11 | 5  | 0.96  | 0.977 | 0.999 | 1.012 | 1.013 | 1.019 | 1.037 | 3.65E-02 |

|                                                 |                                                                               |        |        |      |    |    |    |       |       |       |       |       |       |       |          |
|-------------------------------------------------|-------------------------------------------------------------------------------|--------|--------|------|----|----|----|-------|-------|-------|-------|-------|-------|-------|----------|
| cds.Camellia_sinensis.comp29537_c0_seq1_m.2052  | PREDICT<br>ED: DNA-directed RNA polymerase V subunit 1 [Vitis]                | 102.79 | 6.1456 | 3.6  | 3  | 3  | 3  | 1.066 | 1.337 | 1.053 | 1.011 | 0.759 | 0.748 | 0.729 | 6.26E-02 |
| cds.Camellia_sinensis.comp29537_c0_seq1_m.2053  | PREDICT<br>ED: DNA-directed RNA polymerase V subunit 1 isoform X2 [Juglans]   | 56.261 | 1.3349 | 1.6  | 1  | 1  | 1  | 1.054 | 1.145 | 1.254 | 0.826 | 0.837 | 0.854 | 0.729 | 3.56E-03 |
| cds.Camellia_sinensis.comp29538_c0_seq1_m.25104 | PREDICT<br>ED: cysteine synthase [Vitis vinifera]                             | 34.269 | 187.64 | 50.3 | 13 | 55 | 10 | 0.962 | 0.943 | 0.922 | 1.091 | 1.064 | 1.054 | 1.135 | 1.38E-03 |
| cds.Camellia_sinensis.comp29540_c0_seq1_m.38474 | PREDICT<br>ED: adenylate kinase 4 [Jatropha curcas]                           | 31.07  | 70.014 | 43.7 | 12 | 31 | 8  | 1.008 | 1     | 0.967 | 0.999 | 1.008 | 1.021 | 1.018 | 2.79E-01 |
| cds.Camellia_sinensis.comp29543_c0_seq1_m.4810  | PREDICT<br>ED: probable ubiquitin conjugation factor E4 [Nicotiana attenuata] | 117.01 | 25.636 | 7.8  | 8  | 10 | 8  | 0.954 | 0.98  | 0.999 | 1.009 | 1.024 | 1.014 | 1.039 | 5.27E-02 |

|                                |                                                                                                        |        |        |      |   |   |   |       |       |       |       |       |       |       |          |
|--------------------------------|--------------------------------------------------------------------------------------------------------|--------|--------|------|---|---|---|-------|-------|-------|-------|-------|-------|-------|----------|
| cds.Camellia_sinensis.comp2954 | PREDICT<br>ED:<br>ORANGE,<br>chloroplast<br>ic [Vitis<br>vinifera]                                     | 28.601 | 2.7335 | 3.5  | 1 | 1 | 1 | 0.986 | 0.99  | 1.111 | 1.007 | 1.028 | 0.889 | 0.947 | 4.13E-01 |
| cds.Camellia_sinensis.comp2954 | PREDICT<br>ED:<br>vesicle-<br>associated<br>membrane<br>protein<br>727-like<br>[Gossypium<br>hirsutum] | 19.514 | 2.0884 | 9.3  | 2 | 2 | 2 | 1.062 | 0.961 | 0.996 | 0.965 | 1.026 | 0.989 | 0.987 | 7.34E-01 |
| cds.Camellia_sinensis.comp2954 | PREDICT<br>ED:<br>NPL4-like<br>protein 2<br>[Ipomoea<br>nil]                                           | 45.936 | 75.533 | 14.4 | 5 | 7 | 5 | 0.998 | 1.036 | 0.957 | 0.988 | 1     | 0.985 | 0.994 | 8.24E-01 |
| cds.Camellia_sinensis.comp2955 | PREDICT<br>ED:<br>DEAD-<br>box ATP-<br>dependent<br>RNA<br>helicase 30<br>[Jatropha<br>curcas]         | 16.77  | 9.1415 | 21.5 | 3 | 3 | 3 | 1.024 | 0.965 | 1.013 | 1.022 | 1.059 | 1.002 | 1.027 | 3.35E-01 |





|                                |                   |                                                                                                                                                              |        |        |      |   |    |   |       |       |       |       |       |       |       |          |
|--------------------------------|-------------------|--------------------------------------------------------------------------------------------------------------------------------------------------------------|--------|--------|------|---|----|---|-------|-------|-------|-------|-------|-------|-------|----------|
| cds.Camellia_sinensis.comp2956 | 9_c1_seq1_m.23928 | PREDICT<br>ED:<br>aspartic<br>proteinase<br>nepenthese<br>n-2<br>[Ziziphus<br>jujuba]                                                                        | 50.443 | 1.3437 | 2.6  | 1 | 1  | 1 |       |       |       |       |       |       |       |          |
| cds.Camellia_sinensis.comp2957 | 2_c0_seq1_m.23092 | PREDICT<br>ED:<br>bifunctional<br>D-cysteine<br>desulfhydrase/1-aminocyclopropane-1-carboxylate<br>deaminase,<br>mitochondrial[Daucus carota subsp. sativus] | 48.828 | 31.608 | 17.6 | 7 | 13 | 7 | 1.016 | 1.004 | 0.967 | 0.996 | 1.02  | 0.963 | 0.997 | 9.08E-01 |
| cds.Camellia_sinensis.comp2957 | 4_c0_seq3_m.14046 | PREDICT<br>ED: DNA-damage-repair/tolerant<br>protein<br>DRT111,<br>chloroplastic [Vitis vinifera]                                                            | 21.365 | 4.4728 | 7.5  | 1 | 1  | 1 | 0.934 | 1.01  | 1.141 | 1.021 | 0.895 | 1.012 | 0.949 | 5.22E-01 |

|                                                     |                                                                                               |        |        |     |   |   |   |       |       |       |       |       |       |       |          |
|-----------------------------------------------------|-----------------------------------------------------------------------------------------------|--------|--------|-----|---|---|---|-------|-------|-------|-------|-------|-------|-------|----------|
| cds.Camellia_sinensis.comp2957_7_c0_seq2_m.34497    | period circadian protein [Arabidopsis thaliana] PREDICT ED:                                   | 26.274 | 1.5156 | 6.8 | 1 | 1 | 1 |       |       |       |       |       |       |       |          |
| cds.Camellia_sinensis.comp2958_1_c0_seq1_m.33141    | haloacid dehalogenase-like hydrolase domain-containing protein 3 [Vitis vinifera] PREDICT ED: | 28.455 | 8.9899 | 15  | 4 | 7 | 4 | 0.983 | 1.021 | 0.995 | 1     | 1.012 | 1.022 | 1.012 | 4.14E-01 |
| cds.Camellia_sinensis.comp2958_2_c0_seq2_1_m.3369_5 | dehydrogenase/reductase SDR family member 7 isoform X1 [Nelumbo nucifera] PREDICT ED:         | 35.635 | 13.533 | 19  | 5 | 6 | 5 | 0.958 | 1.025 | 0.983 | 1.06  | 1.011 | 1     | 1.035 | 2.60E-01 |
| cds.Camellia_sinensis.comp2958_6_c0_seq1_m.33130    | isoeugenol synthase 1-like [Ziziphus jujuba]                                                  | 35.935 | 3.5992 | 5.9 | 2 | 2 | 1 | 1.015 | 0.95  | 1.152 | 0.919 | 0.968 | 0.994 | 0.924 | 2.81E-01 |





|                                                 |                                                                                                |        |        |      |    |    |    |       |       |       |       |       |       |       |          |
|-------------------------------------------------|------------------------------------------------------------------------------------------------|--------|--------|------|----|----|----|-------|-------|-------|-------|-------|-------|-------|----------|
| cds.Camellia_sinensis.comp29625_c0_seq1_m.18960 | PREDICT ED: transmembrane protein 87B-like [Ipomoea nil]                                       | 59.072 | 3.3679 | 5    | 3  | 3  | 3  | 0.99  | 0.974 | 1.023 | 1.033 | 0.976 | 1.016 | 1.013 | 6.01E-01 |
| cds.Camellia_sinensis.comp29628_c0_seq1_m.32748 | PREDICT ED: probable ribose-5-phosphate isomerase 3, chloroplastic [Nicotiana tomentosiformis] | 32.504 | 120.75 | 45.8 | 11 | 33 | 11 | 1.03  | 1.007 | 0.991 | 0.974 | 0.987 | 1.002 | 0.979 | 1.94E-01 |
| cds.Camellia_sinensis.comp29631_c0_seq1_m.25884 | PREDICT ED: putative glucose-6-phosphate 1-epimerase isoform X2 [Ricinus communis]             | 34.535 | 43.535 | 12.8 | 3  | 3  | 3  | 0.971 | 0.968 | 0.995 | 1.029 | 0.967 | 1.085 | 1.05  | 2.36E-01 |
| cds.Camellia_sinensis.comp29636_c0_seq1_m.42298 | PREDICT ED: probable glutathione S-transferase [Populus euphratica]                            | 26.993 | 32.805 | 28.9 | 7  | 11 | 7  | 0.924 | 0.907 | 0.92  | 1.075 | 1.116 | 1.043 | 1.176 | 1.36E-03 |

|                                                  |                                                                     |        |        |      |    |    |    |       |       |       |       |       |       |       |          |
|--------------------------------------------------|---------------------------------------------------------------------|--------|--------|------|----|----|----|-------|-------|-------|-------|-------|-------|-------|----------|
| cds.Camellia_sinensis.comp2963_8_c0_seq3_m.36028 | PREDICTED: ATP synthase subunit delta', mitochondrial [Ipomoea nil] | 23.797 | 6.1642 | 20.9 | 5  | 14 | 0  |       |       |       |       |       |       |       |          |
| cds.Camellia_sinensis.comp2963_8_c0_seq4_m.37459 | PREDICTED: ATP synthase subunit delta', mitochondrial [Ipomoea nil] | 23.785 | 22.784 | 20.9 | 5  | 13 | 0  |       |       |       |       |       |       |       |          |
| cds.Camellia_sinensis.comp2964_0_c0_seq1_m.16651 | PREDICTED: protein TIC 55, chloroplastic [Theobroma cacao]          | 65.698 | 84.884 | 33.5 | 19 | 31 | 12 | 0.988 | 1.011 | 1     | 0.994 | 0.986 | 1.01  | 0.997 | 7.72E-01 |
| cds.Camellia_sinensis.comp2964_0_c0_seq2_m.26004 | PREDICTED: protein TIC 55, chloroplastic [Vitis vinifera]           | 57.381 | 7.5249 | 18.6 | 9  | 15 | 2  | 0.991 | 0.915 | 0.929 | 1.085 | 1.076 | 1.029 | 1.125 | 1.60E-02 |
| cds.Camellia_sinensis.comp2964_9_c0_seq1_m.4774  | binding protein [Arabidopsis lyrata subsp. lyrata]                  | 31.408 | 5.1456 | 7    | 2  | 2  | 2  | 1.152 | 1.122 | 1.101 | 0.885 | 0.848 | 0.858 | 0.768 | 1.37E-04 |





|                                                 |                                                                                            |        |        |      |   |    |   |       |       |       |       |       |       |       |          |
|-------------------------------------------------|--------------------------------------------------------------------------------------------|--------|--------|------|---|----|---|-------|-------|-------|-------|-------|-------|-------|----------|
| cds.Camellia_sinensis.comp29657_c0_seq3_m.44557 | eukaryotic translation initiation factor 5A isoform V family protein [Populus trichocarpa] | 14.964 | 14.546 | 19.7 | 3 | 5  | 2 | 1.078 | 1.029 | 1.031 | 0.933 | 0.924 | 0.992 | 0.908 | 2.28E-02 |
| cds.Camellia_sinensis.comp29667_c0_seq1_m.29333 | PREDICTED: DNA-damage-repair/tolerant protein DRT100 [Solanum lycopersicum]                | 40.354 | 1.8888 | 6    | 2 | 2  | 2 | 0.946 | 0.879 | 0.851 | 1.074 | 1.205 | 1.084 | 1.257 | 9.22E-03 |
| cds.Camellia_sinensis.comp29670_c0_seq1_m.28316 | PREDICTED: uricase-2 isozyme 2 [Juglans regia]                                             | 39.992 | 33.176 | 18.6 | 8 | 10 | 8 | 0.958 | 0.949 | 0.991 | 1.023 | 1.063 | 1.041 | 1.079 | 1.15E-02 |
| cds.Camellia_sinensis.comp29671_c0_seq2_m.15629 | PREDICTED: probable lysine--tRNA ligase, cytoplasmic isoform X2 [Jatropha curcas]          | 55.368 | 70.612 | 21.9 | 9 | 11 | 9 | 0.999 | 1.029 | 0.947 | 1.006 | 1.024 | 1.013 | 1.023 | 4.04E-01 |

|                                                                                  |        |        |      |   |    |   |       |       |       |       |       |       |       |          |
|----------------------------------------------------------------------------------|--------|--------|------|---|----|---|-------|-------|-------|-------|-------|-------|-------|----------|
| cds.Camellia_sinensis.comp2967_2_c0_seq1_m.33549                                 | 34.169 | 33.488 | 30.8 | 9 | 12 | 8 | 1.161 | 1.081 | 1.123 | 0.852 | 0.855 | 0.886 | 0.771 | 4.19E-04 |
| cds.Camellia_sinensis.comp2967_2_c0_seq2_m.58600                                 | 12.028 | 1.9488 | 17   | 2 | 3  | 1 | 1.154 | 1.063 | 1.111 | 0.875 | 0.898 | 0.868 | 0.794 | 8.76E-04 |
| cds.Camellia_sinensis.comp2967_9_c0_seq1_m.5887                                  | 81.419 | 4.3922 | 2.7  | 2 | 2  | 2 |       |       |       |       |       |       |       |          |
| PREDICTED:<br>SCY1-like protein 2 [Vitis vinifera]                               |        |        |      |   |    |   |       |       |       |       |       |       |       |          |
| cds.Camellia_sinensis.comp2968_0_c0_seq1_m.30435                                 | 37.838 | 14.158 | 16.7 | 6 | 8  | 5 | 1.057 | 1.035 | 0.992 | 1.017 | 0.954 | 0.968 | 0.953 | 1.48E-01 |
| PREDICTED: malate dehydrogenase, cytoplasmic-like isoform X1 [Nicotiana tabacum] |        |        |      |   |    |   |       |       |       |       |       |       |       |          |
| cds.Camellia_sinensis.comp2968_2_c0_seq1_m.10171                                 | 74.186 | 10.393 | 6.2  | 4 | 6  | 4 | 1.05  | 1.079 | 1.031 | 0.962 | 0.945 | 0.967 | 0.909 | 3.18E-03 |
| PREDICTED: transmembrane 9 superfamily member 11 [Vitis vinifera]                |        |        |      |   |    |   |       |       |       |       |       |       |       |          |

|                                                 |                                                                                              |        |        |      |    |    |    |       |       |       |       |       |       |       |          |
|-------------------------------------------------|----------------------------------------------------------------------------------------------|--------|--------|------|----|----|----|-------|-------|-------|-------|-------|-------|-------|----------|
| cds.Camellia_sinensis.comp29683_c0_seq1_m.10827 | PREDICT<br>ED:<br>protein root UVB sensitive 1, chloroplastic [Vitis vinifera]               | 70.893 | 3.5356 | 4.9  | 2  | 2  | 2  |       |       |       |       |       |       |       |          |
| cds.Camellia_sinensis.comp29686_c0_seq1_m.12915 | PREDICT<br>ED: sterol 3-beta-glucosyltransferase UGT80A2-like isoform X1 [Sesamum indicum]   | 67.241 | 3.5189 | 4.4  | 2  | 2  | 2  | 0.844 | 1.114 | 1.099 | 0.957 | 1.062 | 0.946 | 0.97  | 8.18E-01 |
| cds.Camellia_sinensis.comp29687_c0_seq1_m.40450 | PREDICT<br>ED:<br>probable aldo-keto reductase 2 isoform X2 [Arachis duranensis]             | 22.094 | 240.61 | 67.5 | 11 | 30 | 10 | 0.951 | 0.913 | 0.922 | 1.092 | 1.091 | 1.095 | 1.177 | 5.70E-03 |
| cds.Camellia_sinensis.comp29696_c0_seq2_m.22622 | PREDICT<br>ED:<br>histidinolphosphate aminotransferase, chloroplastic-like [Malus domestica] | 47.013 | 5.8874 | 11   | 3  | 4  | 3  | 1.055 | 1.063 | 0.844 | 1.196 | 1.057 | 0.805 | 1.032 | 8.71E-01 |



|                                |                                                                                                                |        |        |      |    |    |    |       |       |       |       |       |       |       |          |
|--------------------------------|----------------------------------------------------------------------------------------------------------------|--------|--------|------|----|----|----|-------|-------|-------|-------|-------|-------|-------|----------|
| cds.Camellia_sinensis.comp2970 | PREDICT ED: thymidine kinase a isoform X2 [Vitis vinifera]                                                     | 31.114 | 1.7459 | 5.8  | 1  | 1  | 1  |       |       |       |       |       |       |       |          |
| cds.Camellia_sinensis.comp2971 | PREDICT ED: uncharacterized aarF domain-containing protein kinase At1g79600, chloroplastic [Solanum tuberosum] | 75.342 | 62.14  | 18.7 | 11 | 13 | 11 | 0.931 | 0.942 | 1.005 | 1.072 | 1.073 | 1.026 | 1.102 | 2.55E-02 |
| cds.Camellia_sinensis.comp2971 | PREDICT ED: probable cinnamyl alcohol dehydrogenase 1 [Ipomoea nil]                                            | 38.949 | 67.689 | 38.4 | 10 | 15 | 10 | 1.012 | 1.005 | 0.982 | 0.988 | 0.998 | 0.995 | 0.994 | 5.68E-01 |
| cds.Camellia_sinensis.comp2971 | 3-oxoacyl-[acyl-carrier-protein] reductase [Populus trichocarpa]                                               | 23.207 | 1.9009 | 7.1  | 2  | 3  | 1  | 1.065 | 1.04  | 0.998 | 0.965 | 0.971 | 0.956 | 0.932 | 2.29E-02 |

|                                                 |                                                                                         |        |        |      |   |    |   |       |       |       |       |       |       |       |          |
|-------------------------------------------------|-----------------------------------------------------------------------------------------|--------|--------|------|---|----|---|-------|-------|-------|-------|-------|-------|-------|----------|
| cds.Camellia_sinensis.comp29714_c0_seq2_m.52145 | PREDICT<br>ED: 3-oxoacyl-[acyl-carrier-protein] reductase 4 isoform X2 [Vitis vinifera] | 17.023 | 1.4282 | 9.6  | 2 | 3  | 1 | 0.95  | 1.129 | 0.982 | 0.962 | 1.007 | 0.977 | 0.962 | 5.49E-01 |
| cds.Camellia_sinensis.comp29715_c0_seq1_m.34103 | PREDICT<br>ED: inositol-phosphate phosphatase-like [Ziziphus jujuba]                    | 33.47  | 27.018 | 21.4 | 8 | 11 | 8 | 1.009 | 1.011 | 1.038 | 0.955 | 0.979 | 0.983 | 0.954 | 2.13E-02 |
| cds.Camellia_sinensis.comp29717_c0_seq1_m.55314 | PREDICT<br>ED: protein indeterminate-domain 2 isoform X1 [Camelina sativa]              | 15.382 | 2.1418 | 6    | 1 | 1  | 1 | 1.058 | 1.049 | 0.916 | 0.88  | 0.955 | 1.131 | 0.981 | 8.10E-01 |
| cds.Camellia_sinensis.comp29718_c0_seq1_m.27494 | PREDICT<br>ED: caffeic acid 3-O-methyltransferase isoform X3 [Vitis vinifera]           | 42.462 | 39.381 | 28.8 | 9 | 14 | 9 | 1.008 | 0.994 | 1.009 | 1.007 | 1.021 | 0.984 | 1     | 9.85E-01 |

|                                                  |                                                                                                                                                                        |        |        |      |   |    |   |       |       |       |       |       |       |       |          |
|--------------------------------------------------|------------------------------------------------------------------------------------------------------------------------------------------------------------------------|--------|--------|------|---|----|---|-------|-------|-------|-------|-------|-------|-------|----------|
| cds.Camellia_sinensis.comp2972_2_c0_seq1_m.57308 | PREDICT<br>ED:<br>farnesyl<br>pyrophosphatase 1<br>[Arachis<br>ipaensis]<br>SNF1-<br>related<br>kinase<br>regulatory<br>subunit<br>gamma 1<br>[Medicago<br>truncatula] | 13.421 | 10.352 | 19   | 2 | 5  | 1 | 1.075 | 1.062 | 0.836 | 1.064 | 1.005 | 0.963 | 1.02  | 7.85E-01 |
| cds.Camellia_sinensis.comp2972_7_c0_seq1_m.24095 | PREDICT<br>ED:<br>oligopeptidase<br>transporter 3<br>[Nicotiana<br>tabacum]<br>ATP<br>synthase G<br>subunit<br>family<br>protein<br>[Medicago<br>truncatula]           | 47.636 | 46.988 | 19.6 | 7 | 14 | 7 | 0.934 | 0.952 | 0.996 | 1.075 | 1.09  | 1.023 | 1.106 | 2.04E-02 |
| cds.Camellia_sinensis.comp2972_8_c0_seq1_m.9789  | PREDICT<br>ED:<br>oligopeptidase<br>transporter 3<br>[Nicotiana<br>tabacum]<br>ATP<br>synthase G<br>subunit<br>family<br>protein<br>[Medicago<br>truncatula]           | 83.343 | 45.247 | 1.6  | 1 | 1  | 1 | 1.098 | 1.073 | 1.073 | 0.906 | 0.899 | 0.93  | 0.843 | 1.82E-04 |
| cds.Camellia_sinensis.comp2973_9_c0_seq2_m.39439 | PREDICT<br>ED:<br>oligopeptidase<br>transporter 3<br>[Nicotiana<br>tabacum]<br>ATP<br>synthase G<br>subunit<br>family<br>protein<br>[Medicago<br>truncatula]           | 14.202 | 2.2604 | 27   | 4 | 5  | 2 | 1.064 | 0.992 | 0.972 | 1.004 | 0.924 | 1.042 | 0.981 | 6.81E-01 |

|                                                  |                                                                                                   |        |        |      |    |    |    |       |       |       |       |       |       |       |          |
|--------------------------------------------------|---------------------------------------------------------------------------------------------------|--------|--------|------|----|----|----|-------|-------|-------|-------|-------|-------|-------|----------|
| cds.Camellia_sinensis.comp2973_9_c0_seq3_m.40040 | mitochondrial ATP synthase g subunit family protein [Arabidopsis lyrata subsp. lyrata]            | 14.126 | 22.495 | 41.8 | 6  | 10 | 3  | 0.952 | 1.02  | 1.007 | 0.996 | 1.04  | 0.992 | 1.016 | 5.60E-01 |
| cds.Camellia_sinensis.comp2974_1_c0_seq1_m.17121 | carbamoyl-phosphate synthase small chain, chloroplastic isoform X2 [Daucus carota subsp. sativus] | 46.573 | 35.812 | 12.4 | 4  | 7  | 4  | 1.015 | 1.043 | 0.997 | 0.98  | 0.994 | 1.014 | 0.978 | 2.50E-01 |
| cds.Camellia_sinensis.comp2974_2_c0_seq1_m.33840 | kynurenine formamide isoform X1 [Solanum tuberosum]                                               | 32.454 | 94.718 | 32.2 | 10 | 29 | 10 | 0.897 | 0.92  | 0.935 | 1.104 | 1.073 | 1.078 | 1.183 | 3.59E-04 |
| cds.Camellia_sinensis.comp2975_6_c0_seq1_m.19956 | calreticulin family protein [Populus trichocarpa]                                                 | 47.598 | 62.757 | 41.5 | 15 | 26 | 15 | 0.999 | 1.028 | 0.991 | 0.976 | 0.981 | 1.008 | 0.982 | 3.03E-01 |





|                                                 |                                                                                                  |        |        |      |   |   |   |       |       |       |       |       |       |       |          |
|-------------------------------------------------|--------------------------------------------------------------------------------------------------|--------|--------|------|---|---|---|-------|-------|-------|-------|-------|-------|-------|----------|
| cds.Camellia_sinensis.comp29780_c0_seq1_m.42303 | Thioredoxin family protein [Arabidopsis thaliana]<br>PREDICTED:<br>probable polyol transporter 6 | 31.601 | 21.099 | 17.1 | 3 | 5 | 3 | 1.043 | 0.965 | 0.937 | 1.091 | 0.926 | 1     | 1.024 | 7.09E-01 |
| cds.Camellia_sinensis.comp29787_c0_seq2_m.12219 | [Eucalyptus grandis]<br>PREDICTED:<br>scarecrow-like protein 14                                  | 54.799 | 12.065 | 5.9  | 3 | 6 | 3 | 0.921 | 0.922 | 0.893 | 1.137 | 1.048 | 1.13  | 1.212 | 2.46E-03 |
| cds.Camellia_sinensis.comp29789_c0_seq1_m.6782  | [Nicotiana tomentosiformis]<br>PREDICTED:<br>peroxiredoxin-2F, mitochondrial                     | 86.597 | 24.436 | 9.7  | 7 | 9 | 7 | 1.003 | 1.058 | 1.084 | 1.066 | 0.9   | 0.918 | 0.917 | 2.01E-01 |
| cds.Camellia_sinensis.comp29794_c0_seq1_m.35453 | [Daucus carota subsp. sativus]                                                                   | 14.118 | 20.617 | 31.5 | 3 | 9 | 3 | 1.005 | 0.975 | 0.97  | 0.979 | 1.038 | 1.009 | 1.026 | 2.79E-01 |



|                                                 |                                                                                                          |        |        |      |   |   |   |       |       |       |       |       |      |       |          |
|-------------------------------------------------|----------------------------------------------------------------------------------------------------------|--------|--------|------|---|---|---|-------|-------|-------|-------|-------|------|-------|----------|
| cds.Camellia_sinensis.comp29820_c0_seq1_m.12786 | PREDICTED:<br>pentatricopeptide repeat-containing protein<br>At1g10270 [Vitis vinifera]                  | 49.45  | 1.1883 | 3.9  | 2 | 2 | 2 |       |       |       |       |       |      |       |          |
| cds.Camellia_sinensis.comp29828_c0_seq1_m.14841 | PREDICTED: ATP-dependent DNA helicase 2 subunit KU70<br>[Populus euphratica]                             | 71.173 | 2.9452 | 3.2  | 2 | 2 | 2 |       |       |       |       |       |      |       |          |
| cds.Camellia_sinensis.comp29836_c0_seq1_m.28714 | PREDICTED:<br>glyoxylate/succinic semialdehyde reductase 2,<br>chloroplastic isoform X2 [Vitis vinifera] | 21.748 | 39.622 | 19   | 3 | 4 | 3 | 1.066 | 1.042 | 1.054 | 0.973 | 0.933 | 1.05 | 0.935 | 1.23E-01 |
| cds.Camellia_sinensis.comp29844_c0_seq3_m.47883 | PREDICTED: ras-related protein RABD1<br>[Jatropha curcas]                                                | 18.559 | 12.196 | 38.6 | 6 | 7 | 5 | 0.98  | 0.985 | 0.97  | 1.028 | 1.027 | 1.08 | 1.068 | 1.89E-02 |



|                                                  |                                                                                                |        |        |      |    |    |    |       |       |       |       |       |       |       |          |
|--------------------------------------------------|------------------------------------------------------------------------------------------------|--------|--------|------|----|----|----|-------|-------|-------|-------|-------|-------|-------|----------|
|                                                  | PREDICT<br>ED:                                                                                 |        |        |      |    |    |    |       |       |       |       |       |       |       |          |
| cds.Camellia_sinensis.comp2985_9_c0_seq1_m.23083 | uncharacterized GTP-binding protein YjiA [Ricinus communis]                                    | 20.676 | 31.415 | 32.8 | 5  | 6  | 5  | 1.118 | 1.151 | 1.063 | 0.861 | 0.882 | 0.87  | 0.784 | 5.61E-04 |
|                                                  | PREDICT<br>ED:                                                                                 |        |        |      |    |    |    |       |       |       |       |       |       |       |          |
| cds.Camellia_sinensis.comp2987_3_c0_seq1_m.9189  | dolichyl-diphospho oligosaccharide--protein glycosyltransferase subunit STT3B [Vitis vinifera] | 83.31  | 18.558 | 12   | 10 | 14 | 10 | 0.954 | 0.966 | 0.989 | 0.991 | 1.009 | 1.063 | 1.053 | 9.50E-02 |
|                                                  | PREDICT<br>ED:                                                                                 |        |        |      |    |    |    |       |       |       |       |       |       |       |          |
| cds.Camellia_sinensis.comp2987_4_c0_seq1_m.17960 | AP-2 complex subunit mu [Morus notabilis]                                                      | 49.362 | 12.564 | 14.2 | 6  | 8  | 6  | 0.979 | 1.007 | 0.991 | 1.008 | 1.007 | 1.012 | 1.017 | 1.14E-01 |
|                                                  | PREDICT<br>ED:                                                                                 |        |        |      |    |    |    |       |       |       |       |       |       |       |          |
| cds.Camellia_sinensis.comp2988_8_c0_seq2_m.28666 | anthocyanidin reductase ((2S)-flavan-3-ol-forming)-like isoform X2 [Vitis vinifera]            | 38.354 | 62.24  | 25.1 | 10 | 15 | 10 | 0.984 | 0.97  | 0.967 | 0.999 | 1.048 | 1.032 | 1.054 | 2.54E-02 |

|                                                  |                                                                                                    |        |        |      |    |    |   |       |       |       |       |       |       |       |          |
|--------------------------------------------------|----------------------------------------------------------------------------------------------------|--------|--------|------|----|----|---|-------|-------|-------|-------|-------|-------|-------|----------|
| cds.Camellia_sinensis.comp2989_1_c0_seq1_m.28084 | PREDICT<br>ED: lanC-like protein<br>GCR2 [Vitis vinifera]                                          | 46.079 | 19.22  | 14.3 | 6  | 8  | 6 | 0.987 | 1.014 | 0.949 | 0.979 | 1.014 | 1.03  | 1.025 | 3.71E-01 |
| cds.Camellia_sinensis.comp2989_8_c0_seq1_m.36003 | PREDICT<br>ED: tropinone reductase homolog<br>[Sesamum indicum]                                    | 28.72  | 29.677 | 21.3 | 6  | 14 | 4 | 0.958 | 1.031 | 1.041 | 0.998 | 1.024 | 0.962 | 0.985 | 6.64E-01 |
| cds.Camellia_sinensis.comp2990_1_c0_seq1_m.36720 | PREDICT<br>ED: 101 kDa malaria antigen<br>[Phoenix dactylifera]                                    | 19.319 | 34.271 | 31.2 | 6  | 13 | 6 | 1.015 | 0.997 | 0.979 | 0.99  | 0.99  | 1.008 | 0.999 | 9.42E-01 |
| cds.Camellia_sinensis.comp2990_3_c0_seq1_m.17024 | PREDICT<br>ED: 6-phosphogluconate dehydrogenase, decarboxylating 1, chloroplastic [Vitis vinifera] | 54.431 | 26.46  | 29.2 | 12 | 20 | 4 | 0.983 | 0.958 | 0.96  | 1.042 | 1.006 | 1.056 | 1.07  | 1.55E-02 |

|                                                  |                                                                                                    |        |        |      |    |    |   |       |       |       |       |       |       |       |          |
|--------------------------------------------------|----------------------------------------------------------------------------------------------------|--------|--------|------|----|----|---|-------|-------|-------|-------|-------|-------|-------|----------|
| cds.Camellia_sinensis.comp2990_3_c0_seq2_m.17109 | PREDICT<br>ED: 6-phosphogluconate dehydrogenase, decarboxylating 1, chloroplastic [Vitis vinifera] | 54.139 | 120.3  | 37.3 | 16 | 25 | 8 | 0.949 | 0.956 | 0.994 | 1.103 | 1.071 | 1.015 | 1.1   | 2.83E-02 |
| cds.Camellia_sinensis.comp2990_5_c0_seq1_m.16721 | PREDICT<br>ED: probable zinc metalloproteinase EGY3, chloroplastic isoform X1 [Juglans regia]      | 67.992 | 28.865 | 11.9 | 8  | 15 | 8 | 1.007 | 0.977 | 1.025 | 0.991 | 0.987 | 1.027 | 0.999 | 9.49E-01 |
| cds.Camellia_sinensis.comp2991_0_c0_seq1_m.4399  | PREDICT<br>ED: probable prolyl 4-hydroxylase 10 [Gossypium raimondii]                              | 32.219 | 2.5556 | 9.3  | 3  | 3  | 3 |       |       |       |       |       |       |       |          |
| cds.Camellia_sinensis.comp2991_5_c0_seq3_m.16355 | PREDICT<br>ED: exportin-7 isoform X1 [Nelumbo nucifera]                                            | 62.303 | 1.5927 | 3.7  | 2  | 2  | 2 | 1.019 | 1.074 | 0.928 | 0.971 | 0.995 | 1.015 | 0.987 | 8.06E-01 |







|                                                  |                                                                                    |        |        |      |    |    |   |       |       |       |       |       |       |       |          |
|--------------------------------------------------|------------------------------------------------------------------------------------|--------|--------|------|----|----|---|-------|-------|-------|-------|-------|-------|-------|----------|
| cds.Camellia_sinensis.comp2994_1_c0_seq2_m.29977 | PREDICTED:<br>transcription initiation factor IIB-2 [Daucus carota subsp. sativus] | 34.279 | 27.15  | 9    | 3  | 3  | 3 | 0.834 | 1.003 | 0.986 | 1.099 | 1.044 | 1.093 | 1.146 | 8.41E-02 |
| cds.Camellia_sinensis.comp2994_4_c0_seq2_m.24140 | Protease HtpX-2-like protein [Morus notabilis]                                     | 27.982 | 13.874 | 15   | 5  | 5  | 5 | 0.934 | 0.939 | 1.011 | 1.065 | 1.046 | 1.017 | 1.085 | 4.74E-02 |
| cds.Camellia_sinensis.comp2994_7_c0_seq2_m.16040 | PREDICTED:<br>glutamate decarboxylase 1 [Vitis vinifera]                           | 55.542 | 50.339 | 21.5 | 10 | 20 | 9 | 0.889 | 0.956 | 0.926 | 1.116 | 1.066 | 1.075 | 1.175 | 3.08E-03 |
| cds.Camellia_sinensis.comp2994_7_c0_seq3_m.35602 | transmembrane protein, putative [Medicago truncatula]                              | 29.512 | 44.383 | 14.6 | 4  | 4  | 4 | 1.085 | 1.007 | 1.125 | 0.949 | 0.915 | 0.894 | 0.857 | 1.43E-02 |
| cds.Camellia_sinensis.comp2994_9_c0_seq1_m.28537 | 2-oxoacid dehydrogenases acyltransferase family protein [Arabidopsis thaliana]     | 32.796 | 26.088 | 25.2 | 6  | 8  | 5 | 1.066 | 0.939 | 1     | 1.005 | 0.998 | 0.989 | 0.996 | 9.42E-01 |

|                                                  |                                                                                                                                                                                                                                                                                                                                                                  |        |        |      |   |   |   |       |       |       |       |       |       |       |          |
|--------------------------------------------------|------------------------------------------------------------------------------------------------------------------------------------------------------------------------------------------------------------------------------------------------------------------------------------------------------------------------------------------------------------------|--------|--------|------|---|---|---|-------|-------|-------|-------|-------|-------|-------|----------|
| cds.Camellia_sinensis.comp2995_4_c0_seq2_m.42248 | PREDICT<br>ED: 60S<br>ribosomal<br>protein<br>L23-like<br>[Nicotiana<br>tabacum]<br>PREDICT<br>ED:<br>MATH<br>domain<br>and coiled-<br>coil<br>domain-<br>containing<br>protein<br>At2g4246<br>0<br>[Sesamum<br>sodium/cal-<br>cium<br>exchanger<br>family<br>protein /<br>calcium-<br>binding EF<br>hand<br>family<br>protein<br>[Arabidop-<br>sis<br>thaliana] | 15.061 | 23.705 | 39.3 | 5 | 9 | 5 | 1.179 | 1.179 | 1.152 | 0.831 | 0.825 | 0.813 | 0.703 | 1.99E-06 |
| cds.Camellia_sinensis.comp2995_5_c0_seq1_m.35485 | domain<br>and coiled-<br>coil<br>domain-<br>containing<br>protein<br>At2g4246<br>0<br>[Sesamum<br>sodium/cal-<br>cium<br>exchanger<br>family<br>protein /<br>calcium-<br>binding EF<br>hand<br>family<br>protein<br>[Arabidop-<br>sis<br>thaliana]                                                                                                               | 36.878 | 6.313  | 13.2 | 4 | 6 | 4 | 0.93  | 0.967 | 0.917 | 1.142 | 0.981 | 1.056 | 1.13  | 6.15E-02 |
| cds.Camellia_sinensis.comp2995_7_c0_seq1_m.10883 | protein /<br>calcium-<br>binding EF<br>hand<br>family<br>protein<br>[Arabidop-<br>sis<br>thaliana]                                                                                                                                                                                                                                                               | 56.8   | 1.5248 | 1.8  | 1 | 1 | 1 | 1.134 | 1.03  | 1.015 | 0.974 | 0.997 | 0.836 | 0.883 | 1.25E-01 |

|                                |                                                                                    |        |        |      |    |    |    |       |       |       |       |       |       |       |          |
|--------------------------------|------------------------------------------------------------------------------------|--------|--------|------|----|----|----|-------|-------|-------|-------|-------|-------|-------|----------|
| cds.Camellia_sinensis.comp2995 | PREDICTED: cell division protein FtsZ homolog 2-1, chloroplastic [Vitis vinifera]  | 34.357 | 85.035 | 26.5 | 6  | 10 | 5  | 1.061 | 1.121 | 1.04  | 0.938 | 0.905 | 0.932 | 0.861 | 3.98E-03 |
| cds.Camellia_sinensis.comp2997 | PREDICTED: heterogeneous nuclear ribonucleoprotein 1 [Vitis vinifera]              | 42.742 | 48.218 | 11.2 | 4  | 7  | 4  | 0.922 | 1.008 | 0.931 | 1.032 | 1.075 | 1.036 | 1.099 | 3.83E-02 |
| cds.Camellia_sinensis.comp2997 | PREDICTED: tobamovirus multiplication protein 1 [Prunus mume]                      | 20.692 | 1.7538 | 3.9  | 1  | 1  | 1  | 0.972 | 0.929 | 0.979 | 1.021 | 1.066 | 1.056 | 1.091 | 1.41E-02 |
| cds.Camellia_sinensis.comp2997 | PREDICTED: protein EARLY-RESPONSE TO DEHYDRATION 7, chloroplastic [Vitis vinifera] | 48.502 | 73.778 | 30.1 | 12 | 22 | 12 | 0.967 | 0.961 | 0.983 | 1.029 | 1.041 | 1.049 | 1.071 | 1.40E-03 |

|                                                  |                                                                          |        |        |      |   |    |   |       |       |       |       |       |       |       |          |
|--------------------------------------------------|--------------------------------------------------------------------------|--------|--------|------|---|----|---|-------|-------|-------|-------|-------|-------|-------|----------|
| cds.Camellia_sinensis.comp2997_8_c0_seq1_m.26173 | PREDICT ED: annexin D3 [Ricinus]                                         | 39.548 | 8.9225 | 10.7 | 4 | 4  | 4 | 0.968 | 0.907 | 1.057 | 1.072 | 1.011 | 1.008 | 1.054 | 3.26E-01 |
| cds.Camellia_sinensis.comp2998_3_c0_seq2_m.38552 | probable prefoldin subunit 3 isoform X2 [Nelumbo nucifera]               | 19.069 | 19.511 | 7.1  | 1 | 1  | 1 | 0.795 | 1.029 | 1.073 | 1.145 | 1.015 | 0.989 | 1.087 | 4.37E-01 |
| cds.Camellia_sinensis.comp2999_0_c0_seq2_m.8649  | transporter family protein [Populus trichocarpa]                         | 81.758 | 36.259 | 9.4  | 6 | 10 | 6 | 1.064 | 1.048 | 1.007 | 0.963 | 0.951 | 0.927 | 0.911 | 9.40E-03 |
| cds.Camellia_sinensis.comp3000_8_c0_seq1_m.29105 | translocase of chloroplast 34, chloroplastic isoform X2 [Vitis vinifera] | 33.364 | 65.989 | 31   | 9 | 15 | 9 | 0.978 | 0.975 | 1.003 | 1.038 | 1.019 | 1     | 1.034 | 7.48E-02 |
| cds.Camellia_sinensis.comp3000_8_c0_seq2_m.32150 | PREDICT ED: ras-related protein Rab7 [Gossypium arboreum]                | 23.072 | 13.996 | 53.9 | 9 | 22 | 4 | 0.983 | 0.97  | 0.984 | 1.039 | 1.029 | 0.974 | 1.036 | 1.68E-01 |

|                                                   |                                                                                                                                          |        |        |      |    |    |   |       |       |       |       |       |       |       |          |
|---------------------------------------------------|------------------------------------------------------------------------------------------------------------------------------------------|--------|--------|------|----|----|---|-------|-------|-------|-------|-------|-------|-------|----------|
|                                                   | PREDICT                                                                                                                                  |        |        |      |    |    |   |       |       |       |       |       |       |       |          |
|                                                   | ED:                                                                                                                                      |        |        |      |    |    |   |       |       |       |       |       |       |       |          |
| cds.Camellia sinensis .comp3001_1_c0_seq2_m.23817 | DUF21 domain-containing protein At4g14240 [Vitis vinifera]                                                                               | 54.604 | 42.688 | 17.9 | 6  | 6  | 5 | 0.968 | 1.055 | 1.067 | 1.053 | 0.903 | 0.964 | 0.945 | 3.47E-01 |
|                                                   | PREDICT                                                                                                                                  |        |        |      |    |    |   |       |       |       |       |       |       |       |          |
|                                                   | ED:                                                                                                                                      |        |        |      |    |    |   |       |       |       |       |       |       |       |          |
| cds.Camellia sinensis .comp3001_2_c1_seq3_m.27799 | nuclear pore complex protein NUP88 [Vitis vinifera] domon-like ligand-binding domain-containing protein precursor [Solanum lycopersicum] | 38.651 | 10.564 | 14.3 | 5  | 6  | 5 | 1.012 | 0.987 | 1.03  | 0.985 | 0.968 | 0.998 | 0.974 | 1.62E-01 |
|                                                   | PREDICT                                                                                                                                  |        |        |      |    |    |   |       |       |       |       |       |       |       |          |
|                                                   | ED:                                                                                                                                      |        |        |      |    |    |   |       |       |       |       |       |       |       |          |
| cds.Camellia sinensis .comp3001_3_c0_seq1_m.29161 | binding domain-containing protein precursor [Solanum lycopersicum]                                                                       | 39.598 | 2.7553 | 9.1  | 3  | 3  | 3 | 0.913 | 1.055 | 1.121 | 0.945 | 1.013 | 0.964 | 0.946 | 4.61E-01 |
|                                                   | PREDICT                                                                                                                                  |        |        |      |    |    |   |       |       |       |       |       |       |       |          |
|                                                   | ED:                                                                                                                                      |        |        |      |    |    |   |       |       |       |       |       |       |       |          |
| cds.Camellia sinensis .comp3001_8_c0_seq1_m.25032 | protochlorophyllide reductase, chloroplastic [Citrus sinensis]                                                                           | 43.212 | 39.92  | 25.8 | 10 | 15 | 4 | 0.989 | 0.928 | 0.958 | 1.043 | 1.048 | 1.064 | 1.097 | 8.50E-03 |

|                                                 |                                                                           |        |        |      |    |    |    |       |       |       |       |       |       |       |          |
|-------------------------------------------------|---------------------------------------------------------------------------|--------|--------|------|----|----|----|-------|-------|-------|-------|-------|-------|-------|----------|
| cds.Camellia_sinensis.comp30018_c0_seq2_m.25602 | PREDICTED: protochlorophyllide reductase, chloroplastic [Citrus sinensis] | 43.243 | 3.1027 | 18.3 | 7  | 8  | 1  | 0.799 | 0.901 | 0.872 | 1.163 | 1.188 | 1.141 | 1.358 | 1.24E-03 |
| cds.Camellia_sinensis.comp30019_c0_seq1_m.15873 | PREDICTED: blue-light photoreceptor PHR2 [Nicotiana tomentosiformis]      | 49.656 | 2.6415 | 2.6  | 1  | 1  | 1  | 1.473 | 1.266 | 1.338 | 0.627 | 0.559 | 0.615 | 0.442 | 1.38E-04 |
| cds.Camellia_sinensis.comp30020_c0_seq1_m.23866 | PREDICTED: 40S ribosomal protein SA-like [Ipomoea nil]                    | 32.087 | 106.39 | 41.2 | 11 | 27 | 11 | 0.974 | 0.974 | 0.964 | 1.063 | 1.028 | 1.046 | 1.077 | 1.92E-03 |
| cds.Camellia_sinensis.comp30027_c0_seq6_m.31289 | FKBP19, chloroplastic isoform X4 [Cajanus cajan]                          | 17.666 | 11.529 | 35.7 | 5  | 6  | 5  | 1.034 | 1.052 | 1.032 | 0.991 | 0.928 | 0.992 | 0.934 | 3.92E-02 |





|                                                  |                                                                                             |        |        |      |   |   |   |       |       |       |       |       |       |       |          |
|--------------------------------------------------|---------------------------------------------------------------------------------------------|--------|--------|------|---|---|---|-------|-------|-------|-------|-------|-------|-------|----------|
| cds.Camellia_sinensis.comp3004_6_c1_seq7_m.26133 | PREDICTED:<br>bifunctional riboflavin kinase/FMN phosphatase [Daucus carota subsp. sativus] | 43.406 | 9.2158 | 10.4 | 4 | 4 | 4 | 1.066 | 0.99  | 0.996 | 0.955 | 0.981 | 0.973 | 0.953 | 1.30E-01 |
| cds.Camellia_sinensis.comp3004_9_c0_seq1_m.26651 | PREDICTED:<br>methyl-CpG-binding domain-containing protein 13 isoform X4 [Vitis vinifera]   | 45.456 | 14.276 | 10.6 | 3 | 3 | 3 | 1.13  | 1.068 | 1.083 | 0.838 | 0.907 | 0.943 | 0.819 | 6.60E-03 |
| cds.Camellia_sinensis.comp3005_2_c0_seq1_m.27677 | PREDICTED:<br>histidine--tRNA ligase, cytoplasmic [Jatropha curcas]                         | 51.362 | 10.188 | 16.6 | 7 | 8 | 7 | 0.977 | 1.018 | 1.022 | 1.009 | 0.987 | 1.037 | 1.005 | 8.07E-01 |

|                                                 |                                                                                                |        |        |      |    |    |   |       |       |       |       |       |       |       |          |
|-------------------------------------------------|------------------------------------------------------------------------------------------------|--------|--------|------|----|----|---|-------|-------|-------|-------|-------|-------|-------|----------|
| cds.Camellia_sinensis.comp30053_c0_seq1_m.25085 | PREDICTED: 15-cis-phytoene desaturase, chloroplastic/chromoplastic-like [Populus euphratica]   | 52.942 | 3.8256 | 5.4  | 3  | 3  | 3 | 0.949 | 0.961 | 1.062 | 1.009 | 0.982 | 1.055 | 1.025 | 5.71E-01 |
| cds.Camellia_sinensis.comp30057_c0_seq1_m.29301 | 2-dehydro-3-deoxyphosphoheptonate aldolase family protein [Populus trichocarpa]                | 43.241 | 36.368 | 32.1 | 13 | 31 | 7 | 1.294 | 1.258 | 1.324 | 0.676 | 0.671 | 0.673 | 0.521 | 5.23E-04 |
| cds.Camellia_sinensis.comp30057_c1_seq2_m.50785 | PREDICTED: phospho-2-dehydro-3-deoxyheptonate aldolase 1, chloroplastic-like [Malus domestica] | 19.615 | 40.349 | 26.9 | 4  | 8  | 4 | 1.335 | 1.244 | 1.382 | 0.642 | 0.668 | 0.639 | 0.492 | 3.57E-05 |



|                                                  |                                                                                         |        |        |      |    |    |    |       |       |       |       |       |       |       |          |
|--------------------------------------------------|-----------------------------------------------------------------------------------------|--------|--------|------|----|----|----|-------|-------|-------|-------|-------|-------|-------|----------|
| cds.Camellia_sinensis.comp3007_4_c0_seq1_m.11760 | PREDICT<br>ED: beta-adaptin-like protein A [Nicotiana tabacum]                          | 63.034 | 3.4447 | 3    | 1  | 1  | 1  | 0.911 | 1.035 | 0.999 | 0.94  | 1.002 | 1.129 | 1.043 | 5.72E-01 |
| cds.Camellia_sinensis.comp3007_5_c0_seq1_m.24809 | PREDICT<br>ED: malate dehydrogenase, chloroplastic [Solanum tuberosum]                  | 43.67  | 153.91 | 36.9 | 14 | 40 | 14 | 1.01  | 1.001 | 1.018 | 1.001 | 0.985 | 0.971 | 0.976 | 7.43E-02 |
| cds.Camellia_sinensis.comp3007_7_c0_seq1_m.25826 | PREDICT<br>ED: rhomboid-like protein 19 [Juglans regia]                                 | 34.729 | 6.1518 | 5.4  | 1  | 1  | 1  | 0.978 | 0.937 | 1.088 | 0.976 | 1.041 | 0.992 | 1.002 | 9.44E-01 |
| cds.Camellia_sinensis.comp3008_0_c0_seq1_m.19030 | PREDICT<br>ED: glutaredoxin domain-containing cysteine-rich protein 1 [Jatropha curcas] | 37.479 | 49.119 | 27   | 8  | 9  | 8  | 1.016 | 1.028 | 1.015 | 0.949 | 1.006 | 0.979 | 0.959 | 7.26E-02 |
| cds.Camellia_sinensis.comp3008_5_c0_seq1_m.16810 | PREDICT<br>ED: omega-6 fatty acid desaturase, chloroplastic [Vitis vinifera]            | 33.054 | 3.818  | 3.6  | 1  | 1  | 1  | 0.967 | 0.99  | 1.088 | 0.952 | 0.985 | 1.026 | 0.973 | 5.63E-01 |

|                                |                                                                                        |        |        |      |    |    |    |       |       |       |       |       |       |       |          |
|--------------------------------|----------------------------------------------------------------------------------------|--------|--------|------|----|----|----|-------|-------|-------|-------|-------|-------|-------|----------|
| cds.Camellia_sinensis.comp3008 | PREDICT<br>ED: 2S albumin-like<br>[Ricinus communis]                                   | 17.357 | 37.043 | 33.6 | 6  | 10 | 6  | 1.119 | 1.136 | 1.161 | 0.826 | 0.847 | 0.86  | 0.742 | 4.35E-05 |
| cds.Camellia_sinensis.comp3009 | PREDICT<br>ED: protein PPLZ12<br>[Sesamum indicum]                                     | 32.318 | 39.018 | 36.6 | 10 | 16 | 10 | 0.97  | 1.028 | 1.027 | 0.969 | 0.991 | 0.985 | 0.974 | 2.63E-01 |
| cds.Camellia_sinensis.comp3009 | PREDICT<br>ED: polygalacturonase inhibitor-like<br>[Sesamum indicum]                   | 36.854 | 19.237 | 22   | 7  | 15 | 7  | 0.929 | 0.955 | 0.983 | 1.074 | 1.062 | 1.051 | 1.112 | 3.72E-03 |
| cds.Camellia_sinensis.comp3010 | PREDICT<br>ED: 60S ribosomal protein L19-1-like<br>[Cucumis melo]                      | 24.756 | 34.606 | 20.8 | 4  | 8  | 2  | 0.99  | 1.09  | 1.037 | 0.894 | 0.914 | 0.959 | 0.888 | 2.66E-02 |
| cds.Camellia_sinensis.comp3010 | PREDICT<br>ED: indole-3-glycerol phosphate synthase, chloroplastic<br>[Vitis vinifera] | 47.555 | 185.03 | 47.6 | 20 | 51 | 20 | 0.989 | 0.985 | 0.978 | 1.015 | 1.013 | 1.017 | 1.032 | 8.59E-04 |

|                                                  |                                                                   |        |        |      |    |    |    |       |       |       |       |       |       |       |          |
|--------------------------------------------------|-------------------------------------------------------------------|--------|--------|------|----|----|----|-------|-------|-------|-------|-------|-------|-------|----------|
|                                                  | PREDICT                                                           |        |        |      |    |    |    |       |       |       |       |       |       |       |          |
|                                                  | ED:                                                               |        |        |      |    |    |    |       |       |       |       |       |       |       |          |
| cds.Camellia_sinensis.comp3011.9_c0_seq2_m.13290 | probable inactive receptor kinase<br>At1g48480 [Jatropha curcas]  | 68.142 | 13.523 | 7    | 5  | 6  | 5  | 1.01  | 0.975 | 0.94  | 0.979 | 1.041 | 1.069 | 1.056 | 1.78E-01 |
|                                                  | PREDICT                                                           |        |        |      |    |    |    |       |       |       |       |       |       |       |          |
|                                                  | ED:                                                               |        |        |      |    |    |    |       |       |       |       |       |       |       |          |
| cds.Camellia_sinensis.comp3012.1_c0_seq1_m.23941 | homoserine kinase-like<br>[Nicotiana tabacum]                     | 39.752 | 17.585 | 5.5  | 2  | 4  | 2  | 1.002 | 1.032 | 0.984 | 1.03  | 1.008 | 1.011 | 1.01  | 5.39E-01 |
|                                                  | PREDICT                                                           |        |        |      |    |    |    |       |       |       |       |       |       |       |          |
|                                                  | ED:                                                               |        |        |      |    |    |    |       |       |       |       |       |       |       |          |
| cds.Camellia_sinensis.comp3012.3_c0_seq1_m.21466 | serine--tRNA ligase, mitochondrial<br>[Jatropha curcas]           | 58.997 | 79.008 | 21.6 | 10 | 12 | 10 | 0.967 | 0.971 | 0.979 | 1.049 | 1.047 | 1.017 | 1.067 | 3.66E-03 |
|                                                  | PREDICT                                                           |        |        |      |    |    |    |       |       |       |       |       |       |       |          |
|                                                  | ED:                                                               |        |        |      |    |    |    |       |       |       |       |       |       |       |          |
| cds.Camellia_sinensis.comp3012.5_c1_seq1_m.52105 | mitogen-activated protein kinase homolog NTF6<br>[Vitis vinifera] | 19.24  | 1.2801 | 6    | 1  | 1  | 1  | 0.976 | 0.982 | 0.947 | 1.078 | 1.04  | 1     | 1.073 | 4.48E-02 |

|                                |                                                                          |        |        |      |   |    |   |       |       |       |       |       |       |       |          |
|--------------------------------|--------------------------------------------------------------------------|--------|--------|------|---|----|---|-------|-------|-------|-------|-------|-------|-------|----------|
| cds.Camellia_sinensis.comp3012 | PREDICT ED: exocyst complex component SEC10 [Ricinus communis]           | 96.479 | 63.03  | 10.3 | 9 | 10 | 9 | 1.006 | 0.968 | 1.025 | 1.009 | 1     | 1.057 | 1.022 | 4.11E-01 |
| cds.Camellia_sinensis.comp3012 | immunophilin family protein [Populus trichocarpa]                        | 23.23  | 5.6207 | 5.3  | 1 | 1  | 1 | 1.103 | 1.137 | 1.175 | 0.783 | 0.891 | 0.874 | 0.746 | 2.64E-03 |
| cds.Camellia_sinensis.comp3012 | PREDICT ED: angiomotin-like [Jatropha curcas]                            | 39.859 | 2.1643 | 2.2  | 1 | 1  | 1 | 0.958 | 0.88  | 0.931 | 1.039 | 1.126 | 1.098 | 1.178 | 8.86E-03 |
| cds.Camellia_sinensis.comp3014 | PREDICT ED: secoisolari ciresinol dehydrogenase [Vitis vinifera]         | 35.948 | 3.5757 | 5.7  | 2 | 3  | 1 |       |       |       |       |       |       |       |          |
| cds.Camellia_sinensis.comp3014 | PREDICT ED: secoisolari ciresinol dehydrogenase-like [Nicotiana tabacum] | 36.795 | 15.607 | 13   | 4 | 4  | 3 | 0.985 | 0.824 | 0.93  | 1.013 | 1.188 | 1.089 | 1.201 | 5.82E-02 |



|                                                  |                                                                                                |        |        |      |    |    |   |       |       |       |       |       |       |       |          |
|--------------------------------------------------|------------------------------------------------------------------------------------------------|--------|--------|------|----|----|---|-------|-------|-------|-------|-------|-------|-------|----------|
|                                                  | PREDICT<br>ED:                                                                                 |        |        |      |    |    |   |       |       |       |       |       |       |       |          |
| cds.Camellia_sinensis.comp3014_6_c0_seq1_m.21634 | nuclear pore complex protein NUP50A [Theobroma cacao]                                          | 44.255 | 6.2386 | 12.8 | 4  | 4  | 4 | 1.311 | 1.197 | 1.167 | 0.75  | 0.718 | 0.78  | 0.612 | 3.23E-04 |
|                                                  | PREDICT<br>ED:                                                                                 |        |        |      |    |    |   |       |       |       |       |       |       |       |          |
| cds.Camellia_sinensis.comp3015_0_c0_seq1_m.14958 | putative leucine-rich repeat receptor-like serine/threonine-protein kinase At2g14440 [Ipomoea] | 38.064 | 1.2569 | 2    | 1  | 1  | 1 | 1.035 | 1.045 | 1.031 | 0.994 | 1.005 | 0.891 | 0.929 | 1.91E-01 |
|                                                  | PREDICT<br>ED:                                                                                 |        |        |      |    |    |   |       |       |       |       |       |       |       |          |
| cds.Camellia_sinensis.comp3015_8_c0_seq2_m.35978 | vesicle-associated protein 1-3 isoform X2 [Nicotiana glauca]                                   | 26.985 | 4.2751 | 3.7  | 1  | 1  | 1 | 0.993 | 1.012 | 1.036 | 0.88  | 1.059 | 1.021 | 0.973 | 6.32E-01 |
|                                                  | PREDICT<br>ED:                                                                                 |        |        |      |    |    |   |       |       |       |       |       |       |       |          |
| cds.Camellia_sinensis.comp3016_2_c0_seq1_m.16949 | cytochrome P450 89A2-like [Nicotiana glauca]                                                   | 63.252 | 96.112 | 21   | 11 | 17 | 8 | 1.003 | 0.985 | 0.951 | 1.065 | 0.996 | 0.988 | 1.037 | 2.70E-01 |

|                                                 |                                                                                                                 |        |        |      |   |    |   |       |       |       |       |       |       |       |          |
|-------------------------------------------------|-----------------------------------------------------------------------------------------------------------------|--------|--------|------|---|----|---|-------|-------|-------|-------|-------|-------|-------|----------|
| cds.Camellia_sinensis.comp30163_c0_seq4_m.39095 | glycosyltransferase family protein [Populus trichocarpa]                                                        | 31.332 | -2     | 3.8  | 1 | 1  | 1 | 0.975 | 0.976 | 1.074 | 1.047 | 0.906 | 1.034 | 0.987 | 8.20E-01 |
|                                                 | PREDICTED: ATP-dependent Clp protease ATP-binding subunit CLPT1, chloroplastic-like [Nicotiana tomentosiformis] |        |        |      |   |    |   |       |       |       |       |       |       |       |          |
| cds.Camellia_sinensis.comp30177_c0_seq3_m.34348 | chloroplastic-like [Nicotiana tomentosiformis]                                                                  | 25.666 | 16.62  | 12.9 | 3 | 8  | 2 | 0.932 | 1.023 | 0.944 | 1.128 | 0.979 | 0.956 | 1.057 | 4.21E-01 |
|                                                 | PREDICTED: ER membrane protein complex subunit 3 [Vitis vinifera]                                               |        |        |      |   |    |   |       |       |       |       |       |       |       |          |
| cds.Camellia_sinensis.comp30186_c1_seq1_m.34935 | ER membrane protein complex subunit 3 [Vitis vinifera]                                                          | 29.572 | 13.38  | 15.1 | 3 | 3  | 3 | 0.956 | 0.88  | 1.062 | 1.074 | 0.997 | 1.025 | 1.068 | 3.07E-01 |
|                                                 | PREDICTED: 30S ribosomal protein 2, chloroplastic [Sesamum indicum]                                             |        |        |      |   |    |   |       |       |       |       |       |       |       |          |
| cds.Camellia_sinensis.comp30190_c0_seq1_m.10899 | 30S ribosomal protein 2, chloroplastic [Sesamum indicum]                                                        | 28.529 | 50.981 | 23.6 | 7 | 16 | 7 | 1.031 | 1.023 | 1.031 | 0.955 | 0.993 | 0.947 | 0.938 | 1.27E-02 |



|                                                  |                                                                                                    |        |        |      |    |    |    |       |       |       |       |       |       |       |          |
|--------------------------------------------------|----------------------------------------------------------------------------------------------------|--------|--------|------|----|----|----|-------|-------|-------|-------|-------|-------|-------|----------|
| cds.Camellia_sinensis.comp3021_2_c0_seq1_m.7102  | PREDICT<br>ED: heat shock protein 90-6, mitochondrial-like [Nicotiana tabacum]                     | 90.064 | 113.73 | 24.8 | 16 | 31 | 12 | 1.062 | 1.061 | 1.058 | 0.96  | 0.951 | 0.974 | 0.907 | 1.58E-04 |
| cds.Camellia_sinensis.comp3021_4_c0_seq2_m.11773 | PREDICT<br>ED: acetyl-coenzyme A synthetase, chloroplast ic/glyoxysomal isoform X1 [Juglans regia] | 83.117 | 126.23 | 21.4 | 15 | 24 | 15 | 0.965 | 0.966 | 0.974 | 1.028 | 1.041 | 1.036 | 1.069 | 1.42E-04 |
| cds.Camellia_sinensis.comp3021_7_c0_seq1_m.14326 | PREDICT<br>ED: asparagine --tRNA ligase, cytoplasmic 2 [Sesamum indicum]                           | 70.297 | 25.048 | 13.6 | 10 | 12 | 9  | 0.963 | 0.922 | 1.002 | 1.015 | 1.079 | 0.997 | 1.071 | 1.14E-01 |
| cds.Camellia_sinensis.comp3021_9_c0_seq1_m.27886 | PREDICT<br>ED: rho-N domain-containing protein 1, chloroplastic [Vitis vinifera]                   | 40.079 | 4.7068 | 5.3  | 2  | 2  | 2  | 1.265 | 1.217 | 1.338 | 0.742 | 0.683 | 0.678 | 0.551 | 1.18E-04 |

|                                                 |                                                                                   |        |        |      |   |    |   |       |       |       |       |       |       |       |          |
|-------------------------------------------------|-----------------------------------------------------------------------------------|--------|--------|------|---|----|---|-------|-------|-------|-------|-------|-------|-------|----------|
|                                                 | PREDICT                                                                           |        |        |      |   |    |   |       |       |       |       |       |       |       |          |
|                                                 | ED:                                                                               |        |        |      |   |    |   |       |       |       |       |       |       |       |          |
| cds.Camellia_sinensis.comp30223_c0_seq3_m.43652 | phospholipase D alpha 1 [Daucus carota subsp. sativus]                            | 30.004 | 16.354 | 27.7 | 6 | 8  | 2 | 0.986 | 0.991 | 0.989 | 0.964 | 1.041 | 1.04  | 1.027 | 4.20E-01 |
|                                                 | PREDICT                                                                           |        |        |      |   |    |   |       |       |       |       |       |       |       |          |
|                                                 | ED:                                                                               |        |        |      |   |    |   |       |       |       |       |       |       |       |          |
| cds.Camellia_sinensis.comp30236_c0_seq1_m.38327 | aspartokinase 2, chloroplastic isoform X2 [Vitis vinifera]                        | 35.829 | 18.546 | 13   | 4 | 5  | 2 | 1.006 | 0.946 | 1.003 | 1.075 | 0.99  | 0.997 | 1.036 | 3.47E-01 |
|                                                 | PREDICT                                                                           |        |        |      |   |    |   |       |       |       |       |       |       |       |          |
|                                                 | ED:                                                                               |        |        |      |   |    |   |       |       |       |       |       |       |       |          |
| cds.Camellia_sinensis.comp30238_c0_seq1_m.38070 | thylakoid lumenal 17.4 kDa protein, chloroplastic isoform X2 [Populus euphratica] | 25.561 | 53.028 | 35.2 | 7 | 33 | 7 | 0.974 | 0.979 | 0.972 | 1.032 | 1.021 | 1.023 | 1.052 | 2.17E-04 |
|                                                 | PREDICT                                                                           |        |        |      |   |    |   |       |       |       |       |       |       |       |          |
|                                                 | ED:                                                                               |        |        |      |   |    |   |       |       |       |       |       |       |       |          |
| cds.Camellia_sinensis.comp30246_c1_seq1_m.24373 | natterin-1-like [Zea mays]                                                        | 51.883 | 1.7697 | 1.5  | 1 | 2  | 1 | 1.062 | 1.013 | 1.073 | 0.934 | 0.982 | 0.929 | 0.904 | 1.55E-02 |
|                                                 | PREDICT                                                                           |        |        |      |   |    |   |       |       |       |       |       |       |       |          |
|                                                 | ED: serine                                                                        |        |        |      |   |    |   |       |       |       |       |       |       |       |          |
| cds.Camellia_sinensis.comp30254_c0_seq3_m.19705 | carboxypeptidase-like 27 [Vitis vinifera]                                         | 44.262 | 1.5842 | 4.1  | 2 | 2  | 2 | 1.029 | 1.018 | 0.996 | 0.958 | 1.048 | 0.953 | 0.972 | 4.22E-01 |

|                                                  |                                                                                                                               |        |        |      |   |   |   |       |       |       |       |       |       |       |          |
|--------------------------------------------------|-------------------------------------------------------------------------------------------------------------------------------|--------|--------|------|---|---|---|-------|-------|-------|-------|-------|-------|-------|----------|
| cds.Camellia_sinensis.comp3026_6_c0_seq1_m.19323 | PREDICTED: MLO-like protein 10 [Theobroma cacao] peptidoglycan-binding domain-containing family protein [Populus trichocarpa] | 64.39  | 1.6435 | 1.6  | 1 | 1 | 1 |       |       |       |       |       |       |       |          |
| cds.Camellia_sinensis.comp3026_9_c0_seq5_m.34252 | PREDICTED: PLC X domain-containing protein At5g67130 [Juglans regia]                                                          | 34.21  | 2.4845 | 13.4 | 4 | 5 | 2 |       |       |       |       |       |       |       |          |
| cds.Camellia_sinensis.comp3027_1_c0_seq4_m.31584 | PREDICTED: UDP-glycosyltransferase 87A1-like [Fragaria vesca subsp. vesca]                                                    | 44.351 | 2.7778 | 3    | 1 | 1 | 1 | 0.936 | 1.003 | 0.948 | 1.028 | 1.039 | 1.068 | 1.086 | 2.64E-02 |
| cds.Camellia_sinensis.comp3027_5_c0_seq1_m.22683 |                                                                                                                               | 54.242 | 18.609 | 13.3 | 6 | 7 | 6 | 1.011 | 0.996 | 1.016 | 1.04  | 0.947 | 0.975 | 0.98  | 4.97E-01 |

|                                |                                             |        |        |      |   |    |   |
|--------------------------------|---------------------------------------------|--------|--------|------|---|----|---|
|                                | PREDICT                                     |        |        |      |   |    |   |
|                                | ED:                                         |        |        |      |   |    |   |
| cds.Camellia_sinensis.comp3028 | glycine-rich RNA-binding protein 2-like     | 16.248 | 83.979 | 58.5 | 7 | 25 | 0 |
| 5_c0_seq2_m.40271              |                                             |        |        |      |   |    |   |
|                                | [Sesamum indicum]                           |        |        |      |   |    |   |
|                                | PREDICT                                     |        |        |      |   |    |   |
|                                | ED:                                         |        |        |      |   |    |   |
| cds.Camellia_sinensis.comp3028 | glycine-rich RNA-binding protein GRP1A-like | 16.183 | 26.228 | 48.2 | 6 | 23 | 0 |
| 5_c0_seq3_m.43101              |                                             |        |        |      |   |    |   |
|                                | [Tarenaya hassleriana]                      |        |        |      |   |    |   |
|                                | PREDICT                                     |        |        |      |   |    |   |
|                                | ED:                                         |        |        |      |   |    |   |
| cds.Camellia_sinensis.comp3028 | glycine-rich RNA-binding protein 2-like     | 13.511 | 10.157 | 49.6 | 5 | 16 | 0 |
| 5_c0_seq5_m.48679              |                                             |        |        |      |   |    |   |
|                                | [Sesamum indicum]                           |        |        |      |   |    |   |

|                                |                                                                                                                       |        |        |      |    |    |    |       |       |       |       |       |       |       |          |
|--------------------------------|-----------------------------------------------------------------------------------------------------------------------|--------|--------|------|----|----|----|-------|-------|-------|-------|-------|-------|-------|----------|
| cds.Camellia_sinensis.comp3028 | PREDICTED:<br>probable<br>tRNA N6-adenosine<br>threonylcarbamoyltransferase,<br>mitochondrial isoform X2<br>[Populus] | 52.535 | 7.6102 | 5.7  | 2  | 2  | 2  |       |       |       |       |       |       |       |          |
| cds.Camellia_sinensis.comp3028 | PREDICTED:<br>acyl-coenzyme A thioesterase 13-like<br>[Pyrus x bretschneideri]                                        | 17.231 | 3.9146 | 6.3  | 1  | 1  | 1  | 1.04  | 1.002 | 0.965 | 1.023 | 0.991 | 0.984 | 0.997 | 9.19E-01 |
| cds.Camellia_sinensis.comp3029 | PREDICTED:<br>primary amine oxidase-like<br>[Juglans regia] ABC transporter E family member 2<br>[Morus notabilis]    | 82.737 | 135.73 | 36.9 | 23 | 47 | 23 | 1.122 | 1.097 | 1.104 | 0.881 | 0.887 | 0.87  | 0.794 | 1.62E-05 |
| cds.Camellia_sinensis.comp3029 | transporter E family member 2<br>[Morus notabilis]                                                                    | 68.221 | 32.534 | 14.9 | 10 | 12 | 10 | 1.022 | 1.008 | 1.032 | 0.958 | 0.984 | 1.028 | 0.97  | 2.27E-01 |



|                                                  |                                                                                                |        |        |      |    |    |    |       |       |       |       |       |       |       |          |
|--------------------------------------------------|------------------------------------------------------------------------------------------------|--------|--------|------|----|----|----|-------|-------|-------|-------|-------|-------|-------|----------|
|                                                  | PREDICT<br>ED:                                                                                 |        |        |      |    |    |    |       |       |       |       |       |       |       |          |
| cds.Camellia_sinensis.comp3029_9_c1_seq1_m.29581 | vesicle-associated protein 4-2-like [Gossypium hirsutum]                                       | 29.469 | 9.2212 | 11.4 | 2  | 2  | 2  | 1.005 | 0.982 | 1.037 | 1.053 | 0.973 | 0.961 | 0.988 | 7.14E-01 |
|                                                  | PREDICT<br>ED: ER membrane protein complex subunit 2 [Ziziphus jujuba]                         |        |        |      |    |    |    |       |       |       |       |       |       |       |          |
| cds.Camellia_sinensis.comp3030_3_c0_seq1_m.33137 | protein complex subunit 2 [Ziziphus jujuba]                                                    | 21.809 | 5.0825 | 7.6  | 1  | 1  | 1  | 0.984 | 0.979 | 0.882 | 0.958 | 1.118 | 1.094 | 1.114 | 1.49E-01 |
|                                                  | PREDICT<br>ED: non-lysosomal glucosylceramidase-like isoform X2 [Juglans regia]                |        |        |      |    |    |    |       |       |       |       |       |       |       |          |
| cds.Camellia_sinensis.comp3031_2_c0_seq1_m.6452  | lysosomal glucosylceramidase-like isoform X2 [Juglans regia]                                   | 109.58 | 78.849 | 14.8 | 11 | 18 | 11 | 0.983 | 0.993 | 0.985 | 0.997 | 1.009 | 1.031 | 1.026 | 7.01E-02 |
|                                                  | PREDICT<br>ED: mitochondrial import inner membrane translocase subunit TIM22 [Ziziphus jujuba] |        |        |      |    |    |    |       |       |       |       |       |       |       |          |
| cds.Camellia_sinensis.comp3031_3_c0_seq1_m.35730 | mitochondrial import inner membrane translocase subunit TIM22 [Ziziphus jujuba]                | 27.225 | 88.401 | 29.7 | 7  | 17 | 7  | 0.977 | 0.938 | 0.961 | 1.064 | 1.045 | 1.011 | 1.085 | 1.30E-02 |

|                                                 |                                                                                 |        |        |      |   |   |   |       |       |       |       |       |       |       |          |
|-------------------------------------------------|---------------------------------------------------------------------------------|--------|--------|------|---|---|---|-------|-------|-------|-------|-------|-------|-------|----------|
| cds.Camellia_sinensis.comp30319_c0_seq2_m.36426 | PREDICTED:<br>protein SYM1 [Erythrant<br>he guttata]                            | 25.36  | 91.413 | 15.5 | 2 | 5 | 2 | 0.963 | 0.982 | 1.047 | 1.065 | 1.05  | 0.993 | 1.039 | 3.12E-01 |
| cds.Camellia_sinensis.comp30320_c0_seq1_m.24022 | PREDICTED:<br>double-stranded RNA-binding protein 4 isoform X3 [Vitis vinifera] | 39.391 | 5.0646 | 9.5  | 4 | 4 | 2 | 0.987 | 1.095 | 1.143 | 0.917 | 0.922 | 0.93  | 0.859 | 7.50E-02 |
| cds.Camellia_sinensis.comp30323_c0_seq2_m.19870 | PREDICTED:<br>malonyl-CoA decarboxylase, mitochondrial [Vitis vinifera]         | 55.948 | 2.2638 | 1.6  | 1 | 1 | 1 | 0.93  | 1.048 | 0.974 | 1.168 | 0.928 | 0.979 | 1.042 | 6.58E-01 |
| cds.Camellia_sinensis.comp30327_c1_seq1_m.25283 | PREDICTED:<br>PCI domain-containing protein 2 isoform X1 [Jatropha curcas]      | 48.184 | 2.7586 | 6    | 2 | 2 | 2 | 0.902 | 0.946 | 0.957 | 1.051 | 1.103 | 1.074 | 1.151 | 3.56E-03 |
| cds.Camellia_sinensis.comp30328_c0_seq1_m.33208 |                                                                                 | 27.843 | 16.187 | 17.3 | 4 | 5 | 4 | 1.03  | 1.015 | 0.994 | 1.018 | 0.975 | 0.99  | 0.982 | 3.17E-01 |

|                                                 |                                                                                                                     |        |        |     |   |   |   |       |       |       |       |       |       |       |          |
|-------------------------------------------------|---------------------------------------------------------------------------------------------------------------------|--------|--------|-----|---|---|---|-------|-------|-------|-------|-------|-------|-------|----------|
| cds.Camellia_sinensis.comp30329_c0_seq1_m.9005  | PREDICT<br>ED:<br>peroxisome biogenesis protein 5 [Sesamum indicum]                                                 | 85.257 | 4.4744 | 3.7 | 2 | 2 | 2 | 0.829 | 1.089 | 1.008 | 0.99  | 1.017 | 1.095 | 1.06  | 5.01E-01 |
| cds.Camellia_sinensis.comp30330_c0_seq1_m.44090 | PREDICT<br>ED:<br>coiled-coil-helix-coiled-coil-helix domain-containing protein 10, mitochondrial [Sesamum indicum] | 17.89  | 3.54   | 9.7 | 2 | 2 | 2 | 0.95  | 1.061 | 0.969 | 1.009 | 0.963 | 1.062 | 1.018 | 7.00E-01 |
| cds.Camellia_sinensis.comp30332_c0_seq1_m.10145 | PREDICT<br>ED:<br>acetyl-coenzyme A carboxylase subunit alpha, chloroplast-like [Prunus mume]                       | 82.43  | 36.28  | 8   | 5 | 6 | 4 | 0.986 | 1.129 | 1.093 | 0.898 | 0.95  | 0.929 | 0.866 | 3.14E-02 |

|                                                 |                                                                                         |        |        |     |   |   |   |       |       |       |       |       |       |       |          |
|-------------------------------------------------|-----------------------------------------------------------------------------------------|--------|--------|-----|---|---|---|-------|-------|-------|-------|-------|-------|-------|----------|
| cds.Camellia_sinensis.comp30335_c0_seq1_m.49908 | UDP-glycosyltransferase 73C3<br>[Morus notabilis]<br>PREDICTED: LOW QUALITY PROTEIN:    | 19.055 | 1.5191 | 4.7 | 1 | 2 | 1 | 1.077 | 1.043 | 1.093 | 0.939 | 0.94  | 0.897 | 0.864 | 2.12E-03 |
| cds.Camellia_sinensis.comp30337_c0_seq3_m.29088 | mannosyl-oligosaccharide glucosidase GCS1-like<br>[Malus domestica]<br>PREDICTED: beta- | 39.557 | 1.4282 | 2.7 | 1 | 1 | 1 | 0.976 | 1.057 | 1.04  | 0.963 | 0.948 | 1.019 | 0.953 | 2.20E-01 |
| cds.Camellia_sinensis.comp30339_c0_seq1_m.10719 | glucosidase BoGH3B<br>[Solanum pennellii]<br>PREDICTED:                                 | 91.302 | 15.231 | 6   | 5 | 7 | 5 | 1.04  | 1.074 | 1.053 | 0.956 | 0.91  | 0.945 | 0.888 | 2.46E-03 |
| cds.Camellia_sinensis.comp30341_c1_seq1_m.22308 | fasciclin-like arabinogalactan protein 17<br>[Vitis vinifera]                           | 49.243 | 4.6548 | 6.9 | 2 | 2 | 2 | 1.028 | 1.108 | 0.952 | 1.057 | 1.023 | 0.839 | 0.945 | 5.20E-01 |

|                                                  |                                                                                                                                                |        |        |      |   |   |   |       |       |       |       |       |       |       |          |
|--------------------------------------------------|------------------------------------------------------------------------------------------------------------------------------------------------|--------|--------|------|---|---|---|-------|-------|-------|-------|-------|-------|-------|----------|
| cds.Camellia_sinensis.comp3034_1_c2_seq9_m.44946 | PREDICTED: D-xylose-proton symporter-like 3, chloroplast isoform X2 [Ipomoea nil] adenosine/AMP deaminase family protein [Populus trichocarpa] | 17.358 | 20.362 | 28.9 | 4 | 6 | 4 | 0.995 | 0.977 | 0.985 | 0.99  | 1.084 | 1.013 | 1.044 | 2.02E-01 |
| cds.Camellia_sinensis.comp3034_2_c0_seq1_m.25365 | PREDICTED: phosphoglucan phosphatase LSF2, chloroplast isoform X1 [Gossypium raimondii]                                                        | 41.05  | 6.0549 | 3    | 1 | 1 | 1 |       |       |       |       |       |       |       |          |
| cds.Camellia_sinensis.comp3034_7_c0_seq3_m.33116 | PREDICTED: phosphoglucan phosphatase LSF2, chloroplast isoform X1 [Gossypium raimondii]                                                        | 31.254 | 6.7294 | 7.7  | 2 | 3 | 2 | 0.981 | 1.095 | 1.117 | 0.891 | 0.981 | 0.929 | 0.877 | 5.68E-02 |



|                                |                                                                      |        |        |      |    |    |    |       |       |       |       |       |       |       |          |
|--------------------------------|----------------------------------------------------------------------|--------|--------|------|----|----|----|-------|-------|-------|-------|-------|-------|-------|----------|
| cds.Camellia_sinensis.comp3035 | PREDICT<br>ED:<br>vacuolar-sorting receptor 6 [Vitis vinifera]       | 70.812 | 19.802 | 18.6 | 11 | 12 | 11 | 0.915 | 0.967 | 0.935 | 1.065 | 1.065 | 1.105 | 1.148 | 2.38E-03 |
| cds.Camellia_sinensis.comp3035 | PREDICT<br>ED:<br>dihydropyrimidinase [Vitis vinifera]               | 58.109 | 56.545 | 18.2 | 12 | 15 | 12 | 0.923 | 0.945 | 0.93  | 1.112 | 1.065 | 1.074 | 1.162 | 5.57E-04 |
| cds.Camellia_sinensis.comp3036 | PREDICT<br>ED:<br>probable inositol transporter 2 [Nelumbo nucifera] | 65.018 | 15.409 | 6.5  | 3  | 4  | 3  | 1.077 | 0.954 | 0.899 | 1.153 | 0.862 | 1.065 | 1.051 | 6.79E-01 |
| cds.Camellia_sinensis.comp3036 | PREDICT<br>ED:<br>ferredoxin-1 [Gossypium hirsutum]                  | 22.973 | 3.622  | 5.9  | 1  | 2  | 1  |       |       |       |       |       |       |       |          |
| cds.Camellia_sinensis.comp3036 | PREDICT<br>ED:<br>uridine 5'-phosphate synthase-like [Ipomoea nil]   | 57.165 | 14.43  | 6.3  | 3  | 3  | 3  | 1.032 | 1.019 | 0.998 | 0.996 | 0.985 | 0.973 | 0.969 | 5.62E-02 |





|                                |                                                                                         |        |        |      |    |    |    |       |       |       |       |       |       |       |          |
|--------------------------------|-----------------------------------------------------------------------------------------|--------|--------|------|----|----|----|-------|-------|-------|-------|-------|-------|-------|----------|
| cds.Camellia_sinensis.comp3038 | ganine nucleotide-binding protein alpha-1 subunit [Jatropha curcas]                     | 44.776 | 4.853  | 4.9  | 2  | 3  | 2  | 0.924 | 1.009 | 0.938 | 1.122 | 0.989 | 1.048 | 1.1   | 1.05E-01 |
| cds.Camellia_sinensis.comp3038 | external alternative NAD(P)H-ubiquinone oxidoreductase B1, mitochondrial-like [Ipomoea] | 67.612 | 30.735 | 19.9 | 12 | 13 | 11 | 1     | 0.961 | 0.963 | 1.045 | 0.996 | 0.991 | 1.037 | 1.65E-01 |
| cds.Camellia_sinensis.comp3039 | UPF0160 protein [Ziziphus jujuba]                                                       | 41.607 | 21.467 | 13.6 | 4  | 6  | 4  | 0.955 | 1.008 | 1.036 | 0.995 | 1.072 | 1.002 | 1.023 | 5.31E-01 |
| cds.Camellia_sinensis.comp3039 | RNA-binding protein 2-like isoform X2 [Juglans regia]                                   | 29.17  | 1.4747 | 15.2 | 5  | 6  | 2  | 1.017 | 0.967 | 0.984 | 1.005 | 0.999 | 1.038 | 1.025 | 2.63E-01 |

|                                                  |                                                                                                                |        |        |      |   |   |   |       |       |       |       |       |       |       |          |
|--------------------------------------------------|----------------------------------------------------------------------------------------------------------------|--------|--------|------|---|---|---|-------|-------|-------|-------|-------|-------|-------|----------|
| cds.Camellia_sinensis.comp3039_2_c0_seq2_m.44216 | PREDICTED: RNA-binding protein 2-like isoform X2 [Juglans regia]                                               | 25.007 | 17.497 | 32.5 | 7 | 8 | 4 | 1.006 | 0.987 | 0.997 | 1.012 | 0.951 | 1.052 | 1.008 | 8.14E-01 |
| cds.Camellia_sinensis.comp3039_6_c0_seq1_m.9383  | PREDICTED: probable alpha,alpha-trehalose-phosphate synthase [UDP-forming] 7 isoform X3 [Pyrus bretschneideri] | 64.982 | 12.424 | 10.2 | 4 | 4 | 4 | 0.819 | 1.012 | 0.864 | 1.12  | 1.017 | 1.214 | 1.243 | 5.47E-02 |
| cds.Camellia_sinensis.comp3039_6_c0_seq1_m.9384  | PREDICTED: probable alpha,alpha-trehalose-phosphate synthase [UDP-forming] 7, partial [Jatropha curcas]        | 19.457 | 1.5727 | 5.2  | 1 | 1 | 1 | 0.904 | 0.945 | 0.933 | 1.151 | 1.061 | 1.047 | 1.171 | 8.28E-03 |



|                                                 |                                                                                                          |        |        |      |   |    |   |       |       |       |       |       |       |       |          |
|-------------------------------------------------|----------------------------------------------------------------------------------------------------------|--------|--------|------|---|----|---|-------|-------|-------|-------|-------|-------|-------|----------|
| cds.Camellia_sinensis.comp30409_c1_seq1_m.20071 | PREDICT<br>ED: 2-methyl-6-phytyl-1,4-hydroquinone methyltransferase, chloroplast<br>[Populus euphratica] | 38.711 | 77.336 | 21.6 | 6 | 17 | 1 | 0.986 | 1.015 | 1.046 | 0.989 | 1.016 | 0.972 | 0.977 | 3.40E-01 |
| cds.Camellia_sinensis.comp30409_c1_seq3_m.41209 | PREDICT<br>ED: 2-methyl-6-phytyl-1,4-hydroquinone methyltransferase, chloroplast<br>[Theobroma cacao]    | 22.705 | 88.828 | 38.4 | 6 | 11 | 3 | 1.017 | 1.011 | 1.053 | 0.949 | 1.006 | 1.006 | 0.961 | 1.61E-01 |
| cds.Camellia_sinensis.comp30411_c1_seq1_m.31103 | PREDICT<br>ED: 60S ribosomal protein L5<br>[Vitis vinifera]                                              | 35.38  | 30.696 | 16.8 | 6 | 12 | 4 | 0.974 | 0.94  | 0.947 | 1.074 | 1.051 | 1.022 | 1.1   | 6.12E-03 |
| cds.Camellia_sinensis.comp30411_c1_seq2_m.34917 | PREDICT<br>ED: 60S ribosomal protein L5<br>[Populus euphratica]                                          | 34.522 | 3.8403 | 14.6 | 4 | 8  | 2 | 0.95  | 0.961 | 0.961 | 1.139 | 1.002 | 1.017 | 1.1   | 1.49E-01 |

|                                                  |                                                                                                    |        |        |      |   |    |   |       |       |       |       |       |       |       |          |
|--------------------------------------------------|----------------------------------------------------------------------------------------------------|--------|--------|------|---|----|---|-------|-------|-------|-------|-------|-------|-------|----------|
| cds.Camellia_sinensis.comp3041_2_c0_seq1_m.51782 | PREDICT<br>ED: 17.3<br>kDa class I<br>heat shock<br>protein-<br>like<br>[Nelumbo<br>nucifera]      | 11.746 | 3.7243 | 14.9 | 1 | 1  | 1 | 1.052 | 1.083 | 1.118 | 0.874 | 1.036 | 0.825 | 0.841 | 6.53E-02 |
| cds.Camellia_sinensis.comp3041_7_c0_seq1_m.20260 | PREDICT<br>ED:<br>aspartyl<br>protease<br>family<br>protein<br>At5g1077<br>0 [Vitis<br>vinifera]   | 50.917 | 84.664 | 21.8 | 9 | 24 | 9 | 1.052 | 1.071 | 1.009 | 0.931 | 0.959 | 0.963 | 0.911 | 1.07E-02 |
| cds.Camellia_sinensis.comp3041_8_c0_seq1_m.10541 | PREDICT<br>ED: ABC<br>transporter<br>F family<br>member 1<br>[Eucalyptus<br>grandis]               | 53.778 | 23.342 | 17.4 | 8 | 9  | 8 | 0.914 | 1.022 | 1.027 | 1.028 | 1.009 | 0.988 | 1.021 | 6.09E-01 |
| cds.Camellia_sinensis.comp3041_9_c0_seq1_m.29507 | PREDICT<br>ED:<br>bifunctional<br>monothiol<br>glutaredoxin-S16,<br>chloroplastic [Prunus<br>mume] | 37.07  | 12.515 | 20.2 | 6 | 8  | 6 | 1.005 | 1.019 | 1.058 | 0.958 | 0.974 | 0.959 | 0.938 | 1.72E-02 |

|                                                  |                                                                                                  |        |        |      |    |    |    |       |       |       |       |       |       |       |          |
|--------------------------------------------------|--------------------------------------------------------------------------------------------------|--------|--------|------|----|----|----|-------|-------|-------|-------|-------|-------|-------|----------|
| cds.Camellia_sinensis.comp3042_2_c0_seq1_m.48267 | PREDICT<br>ED:<br>dynein light chain 1,<br>cytoplasmic [Jatropha<br>PREDICT                      | 14.258 | 3.083  | 17.3 | 2  | 2  | 2  | 0.994 | 0.966 | 0.987 | 0.996 | 1.004 | 1.064 | 1.04  | 1.62E-01 |
| cds.Camellia_sinensis.comp3042_6_c0_seq1_m.40832 | ED: ras-related<br>protein RABA2a<br>[Prunus mume]<br>PREDICT                                    | 23.839 | 89.244 | 49.3 | 9  | 18 | 1  | 1.034 | 0.971 | 1.028 | 0.99  | 0.972 | 1.009 | 0.98  | 4.22E-01 |
| cds.Camellia_sinensis.comp3042_6_c0_seq2_m.45216 | ED: ras-related<br>protein RABA2a-like<br>[Gossypium<br>arboreum]<br>uncharacterized             | 21.7   | 13.265 | 52.8 | 9  | 14 | 2  | 0.868 | 0.956 | 0.987 | 1.017 | 1.079 | 1.128 | 1.147 | 4.81E-02 |
| cds.Camellia_sinensis.comp3042_7_c0_seq1_m.28594 | LOC102580903<br>[Solanum tuberosum<br>PREDICT                                                    | 41.216 | 112.52 | 43.6 | 14 | 32 | 14 | 0.985 | 0.956 | 0.989 | 1.014 | 1.045 | 1.01  | 1.047 | 3.79E-02 |
| cds.Camellia_sinensis.comp3042_8_c0_seq1_m.32708 | ED:<br>rhodanese-like/PpiC<br>domain-containing<br>protein 12,<br>chloroplastic [Prunus<br>mume] | 25.507 | 28.719 | 31.7 | 6  | 8  | 6  | 1.002 | 1.031 | 1.042 | 1.004 | 0.963 | 1.003 | 0.966 | 1.26E-01 |

|                                |                   |                                                                                                      |        |        |      |    |    |    |       |       |       |       |       |       |       |          |
|--------------------------------|-------------------|------------------------------------------------------------------------------------------------------|--------|--------|------|----|----|----|-------|-------|-------|-------|-------|-------|-------|----------|
| cds.Camellia_sinensis.comp3042 | 9_c1_seq1_m.31899 | PREDICT<br>ED:<br>caffeic acid 3-O-methyltransferase [Vitis vinifera]                                | 38.272 | 65.214 | 43.7 | 13 | 35 | 13 | 1.045 | 1.036 | 1.039 | 0.965 | 0.956 | 0.945 | 0.919 | 2.03E-04 |
| cds.Camellia_sinensis.comp3043 | 1_c0_seq1_m.9052  | PREDICT<br>ED:<br>DEAD-box ATP-dependent RNA helicase 3, chloroplastic isoform X1 [Nelumbo nucifera] | 81.033 | 54.478 | 25.5 | 15 | 25 | 10 | 1.105 | 1.116 | 1.145 | 0.889 | 0.847 | 0.886 | 0.779 | 1.84E-04 |
| cds.Camellia_sinensis.comp3043 | 1_c0_seq2_m.9474  | PREDICT<br>ED:<br>DEAD-box ATP-dependent RNA helicase 3, chloroplastic isoform X1 [Nelumbo nucifera] | 80.434 | 3.4553 | 10.4 | 6  | 10 | 1  | 1.116 | 1.002 | 1.105 | 0.986 | 0.903 | 0.875 | 0.858 | 3.62E-02 |
| cds.Camellia_sinensis.comp3043 | 4_c0_seq1_m.24447 | 3-oxoacyl-[acyl-carrier-protein] reductase [Morus notabilis]                                         | 34.44  | 40.791 | 14.8 | 4  | 9  | 3  | 0.997 | 0.931 | 1.03  | 1.048 | 1.098 | 1.041 | 1.077 | 9.27E-02 |

|                                                     |                                                                                                   |        |        |      |   |    |   |       |       |       |       |       |       |       |          |
|-----------------------------------------------------|---------------------------------------------------------------------------------------------------|--------|--------|------|---|----|---|-------|-------|-------|-------|-------|-------|-------|----------|
| cds.Camellia_sinensis.comp3043_6_c0_seq1_5_m.2985   | Aquaporin PIP2-7 [Morus notabilis]                                                                | 31.629 | 36.815 | 12.5 | 3 | 9  | 3 | 1     | 0.96  | 0.954 | 1.003 | 1.016 | 1.065 | 1.058 | 7.34E-02 |
|                                                     | PREDICTED:<br>eukaryotic translation initiation factor 3 subunit F [Daucus carota subsp. sativus] |        |        |      |   |    |   |       |       |       |       |       |       |       |          |
| cds.Camellia_sinensis.comp3043_6_c0_seq1_6_m.3102_6 |                                                                                                   | 31.338 | 12.763 | 25.3 | 8 | 14 | 8 | 0.966 | 1.003 | 0.951 | 1.023 | 1.029 | 1.033 | 1.057 | 2.63E-02 |
|                                                     | Histone superfamily protein [Arabidopsis thaliana]                                                |        |        |      |   |    |   |       |       |       |       |       |       |       |          |
| cds.Camellia_sinensis.comp3043_6_c0_seq2_8_m.5687_4 |                                                                                                   | 13.537 | 10.603 | 27.5 | 5 | 14 | 3 | 1.189 | 1.173 | 1.1   | 0.883 | 0.792 | 0.779 | 0.709 | 1.70E-03 |
|                                                     | PREDICTED:<br>histone H3.2-like [Nicotiana tabacum]                                               |        |        |      |   |    |   |       |       |       |       |       |       |       |          |
| cds.Camellia_sinensis.comp3043_6_c0_seq9_m.19783    |                                                                                                   | 15.302 | 1.8199 | 16.9 | 3 | 7  | 1 | 1.087 | 1.076 | 1.122 | 0.816 | 0.96  | 0.914 | 0.819 | 1.54E-02 |
|                                                     | PREDICTED:<br>proline iminopeptidase isoform X1 [Prunus                                           |        |        |      |   |    |   |       |       |       |       |       |       |       |          |
| cds.Camellia_sinensis.comp3043_6_c2_seq1_m.16118    |                                                                                                   | 60.755 | 2.663  | 2    | 1 | 1  | 1 | 1.053 | 0.969 | 1.008 | 1.01  | 0.935 | 1.026 | 0.981 | 6.23E-01 |





|                                                 |                                                                                                     |        |        |      |    |    |    |       |       |       |       |       |       |       |          |
|-------------------------------------------------|-----------------------------------------------------------------------------------------------------|--------|--------|------|----|----|----|-------|-------|-------|-------|-------|-------|-------|----------|
| cds.Camellia_sinensis.comp30448_c0_seq1_m.13595 | PREDICTED:<br>bifunctional purine biosynthesis protein PurH-like isoform X2<br>[Gossypium arboreum] | 65.947 | 268.92 | 45.2 | 25 | 67 | 25 | 0.982 | 0.997 | 0.975 | 1.007 | 1.023 | 1.035 | 1.038 | 2.33E-02 |
| cds.Camellia_sinensis.comp30451_c0_seq1_m.44919 | PREDICTED:<br>glyceraldehyde-3-phosphate dehydrogenase, cytosolic<br>[Capsicum annuum]              | 14.387 | 2.1733 | 26.7 | 4  | 7  | 2  | 1.06  | 1.052 | 1.072 | 1.028 | 0.891 | 0.892 | 0.883 | 1.17E-01 |
| cds.Camellia_sinensis.comp30452_c0_seq1_m.32345 | PREDICTED:<br>methyl-CpG-binding domain-containing protein 11<br>[Vitis vinifera]                   | 34.5   | 18.045 | 16.8 | 5  | 10 | 2  | 1.24  | 1.175 | 1.188 | 0.747 | 0.82  | 0.788 | 0.654 | 1.78E-04 |

|                                                  |                                                                                   |        |        |      |    |    |    |       |       |       |       |       |       |       |          |
|--------------------------------------------------|-----------------------------------------------------------------------------------|--------|--------|------|----|----|----|-------|-------|-------|-------|-------|-------|-------|----------|
| cds.Camellia_sinensis.comp3045_2_c0_seq2_m.40812 | PREDICTED:<br>methyl-CpG-binding domain-containing protein 11 [Vitis vinifera]    | 29.818 | 34.764 | 28.8 | 6  | 8  | 5  | 1.237 | 1.268 | 1.251 | 0.782 | 0.683 | 0.745 | 0.588 | 1.85E-04 |
| cds.Camellia_sinensis.comp3045_3_c0_seq1_m.32376 | PREDICTED:<br>bifunctional epoxide hydrolase 2-like [Capsicum annuum]             | 37.333 | 3.0489 | 5.2  | 1  | 1  | 1  | 1.016 | 1.276 | 0.888 | 1.011 | 0.692 | 1.102 | 0.882 | 4.94E-01 |
| cds.Camellia_sinensis.comp3045_3_c1_seq1_m.29710 | PREDICTED:<br>probable 2-oxoglutarate-dependent dioxygenase AOP1 [Vitis vinifera] | 22.474 | 10.463 | 18.7 | 4  | 4  | 4  | 1.142 | 1.146 | 1.222 | 0.804 | 0.807 | 0.834 | 0.697 | 1.36E-04 |
| cds.Camellia_sinensis.comp3045_4_c1_seq1_m.18257 | PREDICTED:<br>dihydrolipoyl dehydrogenase 1, mitochondrial [Ricinus communis]     | 53.812 | 201.3  | 55   | 20 | 60 | 20 | 1.045 | 1.002 | 1.02  | 0.979 | 0.979 | 0.975 | 0.956 | 6.81E-02 |



|                                                  |                                                                                                             |        |        |      |    |    |    |       |       |       |       |       |       |       |          |
|--------------------------------------------------|-------------------------------------------------------------------------------------------------------------|--------|--------|------|----|----|----|-------|-------|-------|-------|-------|-------|-------|----------|
| cds.Camellia_sinensis.comp3046_7_c1_seq1_m.34326 | PREDICTED:<br>homeobox protein BEL1 homolog [Juglans regia]                                                 | 44.679 | 2.0357 | 2.3  | 1  | 1  | 1  | 0.998 | 1.06  | 1.036 | 0.963 | 0.962 | 0.983 | 0.94  | 3.10E-02 |
| cds.Camellia_sinensis.comp3046_7_c2_seq1_m.40185 | PREDICTED: ATP synthase subunit d, mitochondrial-like [Gossypium hirsutum]                                  | 24.9   | 117.83 | 63.8 | 17 | 42 | 15 | 1.049 | 1.01  | 1.039 | 0.974 | 0.98  | 0.966 | 0.943 | 8.18E-03 |
| cds.Camellia_sinensis.comp3046_8_c0_seq2_m.34663 | chalcone--flavonone isomerase 2 [Vitis vinifera]                                                            | 24.735 | 189.7  | 55.2 | 10 | 24 | 10 | 1.205 | 1.153 | 1.183 | 0.791 | 0.814 | 0.811 | 0.682 | 1.83E-05 |
| cds.Camellia_sinensis.comp3046_9_c0_seq1_m.14434 | PREDICTED:<br>probable mitochondrial-rial-processing peptidase subunit beta, mitochondrial [Vitis vinifera] | 63.829 | 180.92 | 31.8 | 19 | 46 | 17 | 0.995 | 1.037 | 1.007 | 1.003 | 0.986 | 0.984 | 0.978 | 1.86E-01 |
| cds.Camellia_sinensis.comp3047_1_c0_seq1_m.40186 | 40S ribosomal protein S19-3 [Cajanus cajan]                                                                 | 16.159 | 88.633 | 65.5 | 12 | 22 | 12 | 0.93  | 0.957 | 0.91  | 1.074 | 1.071 | 1.064 | 1.147 | 7.56E-04 |



|                                                 |                                                                                    |        |        |      |   |   |   |       |       |       |       |       |       |       |          |
|-------------------------------------------------|------------------------------------------------------------------------------------|--------|--------|------|---|---|---|-------|-------|-------|-------|-------|-------|-------|----------|
|                                                 | PREDICT<br>ED:                                                                     |        |        |      |   |   |   |       |       |       |       |       |       |       |          |
| cds.Camellia_sinensis.comp30479_c0_seq3_m.39564 | translation initiation factor eIF-2B subunit beta-like, partial [Prunus mume]      | 22.195 | 3.7682 | 10.6 | 2 | 2 | 1 |       |       |       |       |       |       |       |          |
|                                                 | PREDICT<br>ED:                                                                     |        |        |      |   |   |   |       |       |       |       |       |       |       |          |
| cds.Camellia_sinensis.comp30492_c0_seq4_m.27379 | photosynthetic NDH subunit of lumenal location 3, chloroplastic [Nelumbo nucifera] | 17.619 | 31.666 | 34.9 | 5 | 6 | 5 | 0.97  | 0.976 | 1.001 | 0.972 | 1.046 | 1.096 | 1.057 | 2.11E-01 |
|                                                 | PREDICT<br>ED:                                                                     |        |        |      |   |   |   |       |       |       |       |       |       |       |          |
| cds.Camellia_sinensis.comp30506_c0_seq2_m.33369 | glucose-induced degradation protein 8 homolog isoform X1 [Citrus sinensis]         | 27.493 | 17.758 | 23.6 | 4 | 4 | 4 | 1.032 | 1     | 0.988 | 1.004 | 0.989 | 0.991 | 0.988 | 4.40E-01 |

|                                                                                              |                   |        |        |      |    |    |    |       |       |       |       |       |       |       |          |
|----------------------------------------------------------------------------------------------|-------------------|--------|--------|------|----|----|----|-------|-------|-------|-------|-------|-------|-------|----------|
| cds.Camellia_sinensis.comp3050                                                               | 8_c0_seq2_m.12649 | 63.401 | 70.189 | 25.3 | 12 | 14 | 12 | 0.987 | 1.021 | 0.953 | 1.021 | 0.997 | 0.999 | 1.019 | 4.21E-01 |
| PREDICTED:<br>methylcrotonoyl-CoA carboxylase beta chain, mitochondrial<br>[Jatropha curcas] |                   |        |        |      |    |    |    |       |       |       |       |       |       |       |          |
| cds.Camellia_sinensis.comp3050                                                               | 9_c0_seq1_m.20039 | 25.747 | 9.1807 | 5.2  | 1  | 1  | 1  | 1.114 | 0.956 | 0.87  | 1.027 | 1.086 | 0.952 | 1.043 | 6.07E-01 |
| peptidase M50B-like protein<br>[Medicago truncatula]                                         |                   |        |        |      |    |    |    |       |       |       |       |       |       |       |          |
| cds.Camellia_sinensis.comp3051                                                               | 7_c0_seq1_m.10671 | 76.909 | 1.7207 | 6.4  | 4  | 6  | 2  | 1.036 | 0.974 | 1.012 | 0.973 | 0.968 | 0.996 | 0.972 | 2.30E-01 |
| PREDICTED: zinc finger BED domain-containing protein<br>DAYSLEPER-like<br>[Vitis vinifera]   |                   |        |        |      |    |    |    |       |       |       |       |       |       |       |          |



|                                                  |                                                                                                                                   |        |        |      |   |   |   |       |       |       |       |       |       |       |          |
|--------------------------------------------------|-----------------------------------------------------------------------------------------------------------------------------------|--------|--------|------|---|---|---|-------|-------|-------|-------|-------|-------|-------|----------|
| cds.Camellia_sinensis.comp3052.5_c0_seq1_m.4935  | PREDICTED:<br>probable<br>inactive<br>ATP-dependent<br>zinc metalloprotease<br>FTSHI 1,<br>chloroplastic<br>[Nicotiana attenuata] | 107.86 | 17.409 | 6.8  | 6 | 7 | 6 | 1.05  | 0.998 | 1.041 | 0.972 | 0.954 | 0.936 | 0.927 | 1.63E-02 |
| cds.Camellia_sinensis.comp3052.6_c0_seq1_m.17626 | PREDICTED:<br>CDK5RA<br>P3-like<br>protein<br>[Theobroma cacao]                                                                   | 64.311 | 9.7735 | 9.1  | 6 | 7 | 6 | 0.969 | 0.98  | 0.963 | 1.041 | 1.046 | 0.996 | 1.059 | 2.57E-02 |
| cds.Camellia_sinensis.comp3052.8_c0_seq1_m.29937 | PREDICTED:<br>E3<br>ubiquitin-ligase<br>At1g63170-like<br>[Ipomoea nil]                                                           | 37.631 | 4.0865 | 10.6 | 2 | 2 | 2 |       |       |       |       |       |       |       |          |
| cds.Camellia_sinensis.comp3053.2_c0_seq1_m.22428 | PREDICTED:<br>calcium-transporting<br>ATPase<br>1,<br>chloroplastic<br>[Solanum pennellii]                                        | 47.557 | 4.5251 | 6.3  | 3 | 4 | 3 | 0.928 | 0.925 | 0.969 | 1.038 | 1.086 | 1.084 | 1.137 | 3.66E-03 |



|                                                                 |                                                                                                                                                                                                                                                                                                                                                                                                                                                                  |        |        |      |    |    |    |       |       |       |       |       |       |       |          |
|-----------------------------------------------------------------|------------------------------------------------------------------------------------------------------------------------------------------------------------------------------------------------------------------------------------------------------------------------------------------------------------------------------------------------------------------------------------------------------------------------------------------------------------------|--------|--------|------|----|----|----|-------|-------|-------|-------|-------|-------|-------|----------|
|                                                                 | PREDICT<br>ED: 5'-<br>methylthio<br>adenosine/<br>S-<br>adenosylh<br>omocysteine<br>nucleosida<br>se 1-like<br>isoform<br>X1<br>[Juglans<br>PREDICT<br>ED: 30S<br>ribosomal<br>protein<br>S10,<br>chloroplast<br>ic [Juglans<br>regia]<br>PREDICT<br>ED:<br>phenylalan<br>ine--tRNA<br>ligase,<br>chloroplast<br>ic/mitocho<br>ndrial<br>[Vitis<br>vinifera]<br>Nuclear<br>transport<br>factor 2<br>(NTF2)<br>family<br>protein<br>[Arabidop<br>sis<br>thaliana] | 32.258 | 15.685 | 19.6 | 4  | 7  | 4  | 0.939 | 0.963 | 0.979 | 1.056 | 1.039 | 1.076 | 1.101 | 3.70E-03 |
| cds.Camell<br>ia_sinensis<br>.comp3057<br>1_c0_seq1<br>_m.31708 |                                                                                                                                                                                                                                                                                                                                                                                                                                                                  |        |        |      |    |    |    |       |       |       |       |       |       |       |          |
| cds.Camell<br>ia_sinensis<br>.comp3057<br>3_c0_seq2<br>_m.39452 |                                                                                                                                                                                                                                                                                                                                                                                                                                                                  | 21.737 | 2.0996 | 8.5  | 2  | 5  | 2  | 1.019 | 1.101 | 1.025 | 0.901 | 0.975 | 0.979 | 0.908 | 5.78E-02 |
|                                                                 |                                                                                                                                                                                                                                                                                                                                                                                                                                                                  |        |        |      |    |    |    |       |       |       |       |       |       |       |          |
| cds.Camell<br>ia_sinensis<br>.comp3057<br>7_c0_seq1<br>_m.21840 |                                                                                                                                                                                                                                                                                                                                                                                                                                                                  | 52.454 | 61.358 | 32   | 12 | 16 | 12 | 1.008 | 0.998 | 0.985 | 0.986 | 1.021 | 1.003 | 1.006 | 6.31E-01 |
|                                                                 |                                                                                                                                                                                                                                                                                                                                                                                                                                                                  |        |        |      |    |    |    |       |       |       |       |       |       |       |          |
| cds.Camell<br>ia_sinensis<br>.comp3057<br>9_c0_seq4<br>_m.29219 |                                                                                                                                                                                                                                                                                                                                                                                                                                                                  | 32.174 | 11.875 | 11.6 | 3  | 4  | 3  | 1.033 | 1.125 | 0.967 | 0.968 | 0.933 | 1.01  | 0.932 | 2.32E-01 |



|                                                  |                                                                     |        |        |      |   |    |   |       |       |       |       |       |       |       |          |
|--------------------------------------------------|---------------------------------------------------------------------|--------|--------|------|---|----|---|-------|-------|-------|-------|-------|-------|-------|----------|
|                                                  | PREDICT<br>ED:                                                      |        |        |      |   |    |   |       |       |       |       |       |       |       |          |
| cds.Camellia_sinensis.comp3060_4_c1_seq3_m.17421 | polyadenylate-binding protein RBP45-like<br>[Ipomoea                | 39.706 | 17.958 | 7.9  | 3 | 8  | 3 | 0.963 | 0.967 | 1.014 | 1.045 | 1.085 | 0.997 | 1.062 | 1.12E-01 |
|                                                  | PREDICT<br>ED:                                                      |        |        |      |   |    |   |       |       |       |       |       |       |       |          |
| cds.Camellia_sinensis.comp3060_4_c1_seq5_m.19357 | polyadenylate-binding protein RBP45<br>[Daucus carota subsp.        | 49.307 | 47.177 | 13.4 | 5 | 10 | 5 | 1.009 | 0.971 | 0.969 | 0.996 | 1.01  | 1.083 | 1.047 | 1.89E-01 |
| cds.Camellia_sinensis.comp3061_4_c0_seq1_m.48786 |                                                                     | 13.261 | 8.15   | 23.8 | 3 | 3  | 3 | 1.088 | 1.026 | 1.057 | 0.908 | 0.918 | 0.987 | 0.887 | 1.82E-02 |
|                                                  | PREDICT<br>ED:                                                      |        |        |      |   |    |   |       |       |       |       |       |       |       |          |
| cds.Camellia_sinensis.comp3061_4_c0_seq2_m.53959 | inactive protein<br>RESTRICTED TEV MOVEMENT 2<br>[Solanum tuberosum | 12.797 | 5.5342 | 18.8 | 3 | 3  | 3 | 1.025 | 1.142 | 1.068 | 0.893 | 0.925 | 0.901 | 0.84  | 6.50E-03 |

|                                                 |                                                                                          |        |        |      |   |    |   |       |       |       |       |       |       |       |          |
|-------------------------------------------------|------------------------------------------------------------------------------------------|--------|--------|------|---|----|---|-------|-------|-------|-------|-------|-------|-------|----------|
| cds.Camellia_sinensis.comp30618_c0_seq3_m.37107 | PREDICTED: 5-formyltetrahydrofolate cyclo-ligase, mitochondrial-like [Nicotiana tabacum] | 26.275 | 4.752  | 11.9 | 2 | 3  | 2 | 0.872 | 0.983 | 0.987 | 1.272 | 0.946 | 0.988 | 1.128 | 3.24E-01 |
| cds.Camellia_sinensis.comp30619_c0_seq1_m.21275 | PREDICTED: repeat-containing protein At4g35850, mitochondrial-like [Nicotiana tabacum]   | 53.506 | 6.6988 | 8    | 4 | 5  | 4 | 0.95  | 0.981 | 1.036 | 1.033 | 1.011 | 1.009 | 1.029 | 3.31E-01 |
| cds.Camellia_sinensis.comp30621_c0_seq1_m.31503 | zinc finger protein [Populus trichocarpa]                                                | 34.394 | 1.8312 | 2.4  | 1 | 1  | 1 | 1.091 | 1.105 | 1.078 | 0.962 | 0.868 | 0.876 | 0.827 | 4.68E-03 |
| cds.Camellia_sinensis.comp30622_c0_seq1_m.27600 | PREDICTED: phosphoglycerate mutase-like protein 1 isoform X1 [Sesamum indicum]           | 31.245 | 27.202 | 33.3 | 7 | 11 | 7 | 1.02  | 1.006 | 0.963 | 0.979 | 0.953 | 1.062 | 1.002 | 9.82E-01 |

|                                                 |                                                                                                                                                            |        |        |     |   |   |   |       |       |       |       |       |       |       |          |
|-------------------------------------------------|------------------------------------------------------------------------------------------------------------------------------------------------------------|--------|--------|-----|---|---|---|-------|-------|-------|-------|-------|-------|-------|----------|
| cds.Camellia_sinensis.comp30625_c0_seq1_m.28951 | PREDICTED:<br>uncharacterized methyltransferase At2g41040, chloroplastic [Sesamum indicum] Protein phosphatase 1 regulatory subunit pprA [Morus notabilis] | 38.227 | 22.256 | 16  | 5 | 5 | 5 | 0.938 | 0.905 | 1.009 | 1.1   | 1.037 | 1.047 | 1.116 | 3.97E-02 |
| cds.Camellia_sinensis.comp30629_c0_seq1_m.29610 | PREDICTED:<br>nuclear pore complex protein NUP1 isoform X1 [Vitis vinifera]                                                                                | 40.768 | 1.5357 | 2.2 | 1 | 1 | 1 | 0.951 | 0.878 | 0.966 | 1.148 | 1.066 | 1.028 | 1.16  | 2.80E-02 |
| cds.Camellia_sinensis.comp30630_c0_seq1_m.10372 | PREDICTED: 2-oxoglutarate-dependent dioxygenase DAO [Vitis vinifera]                                                                                       | 83.744 | 4.1297 | 4.4 | 3 | 3 | 3 | 0.997 | 1.023 | 1.003 | 0.978 | 1.023 | 0.984 | 0.987 | 4.71E-01 |
| cds.Camellia_sinensis.comp30631_c0_seq1_m.33662 |                                                                                                                                                            | 33.894 | 2.4382 | 3.9 | 1 | 1 | 1 | 0.88  | 1.056 | 1.003 | 1.102 | 1.011 | 0.979 | 1.052 | 4.64E-01 |





|                                                 |                                                                                                        |        |        |      |    |    |    |       |       |       |       |       |       |       |          |
|-------------------------------------------------|--------------------------------------------------------------------------------------------------------|--------|--------|------|----|----|----|-------|-------|-------|-------|-------|-------|-------|----------|
| cds.Camellia_sinensis.comp30675_c0_seq1_m.8779  | PREDICTED: 1,4-alpha-glucan-branching enzyme 1, chloroplastic/amyloplastic isoform X1 [Vitis vinifera] | 96.568 | 48.838 | 20.9 | 18 | 20 | 18 | 1.139 | 1.137 | 1.156 | 0.85  | 0.833 | 0.833 | 0.733 | 1.71E-06 |
| cds.Camellia_sinensis.comp30678_c0_seq2_m.27253 | PREDICTED: maltose excess protein 1, chloroplastic isoform X1 [Ricinus communis]                       | 30.645 | 4.1173 | 4.6  | 1  | 1  | 1  | 1.029 | 1.064 | 1.021 | 0.975 | 0.95  | 0.959 | 0.926 | 6.54E-03 |
| cds.Camellia_sinensis.comp30683_c0_seq1_m.31687 | PREDICTED: peroxidase 72-like [Nelumbo nucifera]                                                       | 40.265 | 117.69 | 36.5 | 11 | 24 | 11 | 0.95  | 0.936 | 0.952 | 1.068 | 1.054 | 1.064 | 1.123 | 6.15E-05 |
| cds.Camellia_sinensis.comp30689_c0_seq1_m.27969 | nucleotidyl transferase [Medicago truncatula]                                                          | 44.514 | 44.555 | 24.8 | 10 | 14 | 10 | 0.953 | 0.977 | 0.998 | 1.062 | 1.043 | 1.032 | 1.071 | 1.18E-02 |
| cds.Camellia_sinensis.comp30697_c0_seq1_m.25600 | PREDICTED: SEC12-like protein 2 [Nelumbo nucifera]                                                     | 31.402 | 4.2576 | 7.3  | 2  | 2  | 2  | 1.072 | 0.954 | 1.009 | 0.943 | 0.956 | 1.06  | 0.975 | 6.35E-01 |

|                                                                                                               |                   |        |        |      |    |    |    |       |       |       |       |       |       |       |          |
|---------------------------------------------------------------------------------------------------------------|-------------------|--------|--------|------|----|----|----|-------|-------|-------|-------|-------|-------|-------|----------|
| cds.Camellia_sinensis.comp3069                                                                                | 9_c1_seq1_m.13420 | 60.706 | 60.371 | 24.5 | 13 | 25 | 13 | 1.018 | 1.011 | 1.024 | 0.965 | 0.989 | 0.981 | 0.961 | 8.26E-03 |
| PREDICTED:<br>glutamyl-tRNA(Gln)<br>amidotransferase subunit B,<br>chloroplastic/mitochondrial<br>[Theobroma] |                   |        |        |      |    |    |    |       |       |       |       |       |       |       |          |
| cds.Camellia_sinensis.comp3070                                                                                | 2_c0_seq1_m.38848 | 22.419 | 12.705 | 17.5 | 4  | 6  | 4  | 1.03  | 1.02  | 1.041 | 0.977 | 0.958 | 0.95  | 0.933 | 2.48E-03 |
| repair RAD52-like protein 1,<br>mitochondrial [Vitis vinifera]                                                |                   |        |        |      |    |    |    |       |       |       |       |       |       |       |          |
| cds.Camellia_sinensis.comp3072                                                                                | 2_c0_seq1_m.25310 | 33.047 | 3.6446 | 6    | 2  | 3  | 2  | 1.025 | 1.035 | 1.014 | 1.005 | 0.972 | 0.953 | 0.953 | 4.40E-02 |
| PREDICTED:<br>lecithin-cholesterol acyltransferase-like 1<br>[Juglans regia]                                  |                   |        |        |      |    |    |    |       |       |       |       |       |       |       |          |
| cds.Camellia_sinensis.comp3072                                                                                | 2_c0_seq1_m.25311 | 18.598 | 5.0967 | 11.8 | 2  | 2  | 2  | 1.057 | 1.122 | 1.026 | 0.973 | 0.915 | 0.896 | 0.869 | 1.76E-02 |
| PREDICTED:<br>lecithin-cholesterol acyltransferase-like 1<br>[Juglans regia]                                  |                   |        |        |      |    |    |    |       |       |       |       |       |       |       |          |

|                                                  |                                                                             |        |        |      |   |    |   |       |       |       |       |       |       |       |          |
|--------------------------------------------------|-----------------------------------------------------------------------------|--------|--------|------|---|----|---|-------|-------|-------|-------|-------|-------|-------|----------|
| cds.Camellia_sinensis.comp30729_c0_seq15_m.47517 | PREDICTED: callose synthase 2-like [Camelina sativa]                        | 13.925 | 5.806  | 9.1  | 1 | 1  | 1 | 1.057 | 0.946 | 0.948 | 1.035 | 0.961 | 1.06  | 1.036 | 4.93E-01 |
| cds.Camellia_sinensis.comp30732_c0_seq1_m.1325   | PREDICTED: auxin transport protein BIG [Vitis vinifera]                     | 186.72 | 3.7505 | 1.4  | 2 | 2  | 2 |       |       |       |       |       |       |       |          |
| cds.Camellia_sinensis.comp30736_c0_seq1_m.27581  | PREDICTED: protein transport protein SEC13 homolog B-like [Malus domestica] | 32.894 | 2.8494 | 12   | 3 | 9  | 1 | 0.938 | 0.92  | 0.977 | 1.051 | 1.127 | 1.018 | 1.127 | 2.68E-02 |
| cds.Camellia_sinensis.comp30740_c0_seq1_m.25588  | PREDICTED: grpE protein homolog, mitochondrial isoform X2 [Sesamum]         | 26.957 | 25.219 | 9.1  | 2 | 3  | 2 | 1.025 | 1.07  | 1.015 | 0.948 | 0.911 | 0.992 | 0.917 | 4.14E-02 |
| cds.Camellia_sinensis.comp30740_c0_seq1_m.25589  | PREDICTED: protein GrpE-like isoform X2 [Cucumis melo]                      | 17.072 | 34.481 | 36.4 | 7 | 10 | 7 | 1.034 | 1.038 | 1.083 | 0.966 | 0.925 | 0.953 | 0.901 | 6.12E-03 |



|                                                  |                                                                                  |        |        |      |    |    |    |       |       |       |       |       |       |       |          |
|--------------------------------------------------|----------------------------------------------------------------------------------|--------|--------|------|----|----|----|-------|-------|-------|-------|-------|-------|-------|----------|
|                                                  | PREDICT<br>ED:<br>uncharacterized<br>aaRF                                        |        |        |      |    |    |    |       |       |       |       |       |       |       |          |
| cds.Camellia_sinensis.comp3078_8_c0_seq1_m.9388  | domain-containing protein kinase<br>At4g31390,<br>chloroplastic [Vitis vinifera] | 77.309 | 22.392 | 17   | 11 | 13 | 11 | 0.947 | 0.987 | 0.966 | 1.019 | 1.044 | 1.051 | 1.074 | 9.38E-03 |
|                                                  | PREDICT                                                                          |        |        |      |    |    |    |       |       |       |       |       |       |       |          |
| cds.Camellia_sinensis.comp3079_2_c0_seq1_m.34107 | ED: alkane hydroxylase MAH1-like<br>[Nicotiana tabacum]                          | 31.537 | 3.2288 | 7    | 2  | 2  | 2  | 0.863 | 0.931 | 0.917 | 1.208 | 1.004 | 1.127 | 1.232 | 2.47E-02 |
|                                                  | PREDICT                                                                          |        |        |      |    |    |    |       |       |       |       |       |       |       |          |
| cds.Camellia_sinensis.comp3080_0_c0_seq1_m.32560 | ED:<br>phytanoyl-CoA dioxygenase<br>[Prunus mume]<br>transcription               | 19.952 | 5.5707 | 11.3 | 3  | 3  | 3  | 0.902 | 0.991 | 1.027 | 1.086 | 1.018 | 1.006 | 1.065 | 2.32E-01 |
|                                                  | on                                                                               |        |        |      |    |    |    |       |       |       |       |       |       |       |          |
| cds.Camellia_sinensis.comp3080_4_c0_seq1_m.38835 | termination factor family protein<br>[Medicago truncatula]                       | 24.086 | 21.122 | 18.3 | 5  | 5  | 5  | 1.032 | 1.037 | 1.024 | 0.997 | 0.966 | 0.975 | 0.95  | 6.92E-03 |





|                                                 |                                                                                 |        |        |      |   |    |   |       |       |       |       |       |       |       |          |
|-------------------------------------------------|---------------------------------------------------------------------------------|--------|--------|------|---|----|---|-------|-------|-------|-------|-------|-------|-------|----------|
| cds.Camellia_sinensis.comp30836_c1_seq1_m.24886 | PREDICT<br>ED: post-GPI attachment to proteins factor 3 [Jatropha curcas]       | 39.38  | 24.268 | 8.5  | 2 | 3  | 2 | 0.93  | 1.096 | 0.927 | 0.997 | 1.045 | 1.022 | 1.038 | 5.23E-01 |
| cds.Camellia_sinensis.comp30842_c0_seq1_m.30149 | PREDICT<br>ED: peroxidase N1 [Solanum tuberosum]                                | 38.299 | 17.217 | 14.1 | 4 | 4  | 4 | 0.854 | 0.979 | 0.991 | 1.019 | 1.102 | 1.091 | 1.137 | 7.20E-02 |
| cds.Camellia_sinensis.comp30843_c0_seq1_m.19911 | PREDICT<br>ED: COP9 signalosome complex subunit 1 [Vitis]                       | 50.277 | 21.537 | 11.8 | 5 | 5  | 5 | 0.918 | 0.971 | 0.973 | 1.051 | 1.065 | 1.045 | 1.104 | 7.40E-03 |
| cds.Camellia_sinensis.comp30846_c0_seq1_m.36865 | PREDICT<br>ED: psbP domain-containing protein 7, chloroplastic [Vitis vinifera] | 30.996 | 41.726 | 37.1 | 9 | 11 | 9 | 0.997 | 1.012 | 0.961 | 0.999 | 0.997 | 1.012 | 1.013 | 4.66E-01 |



|                                                  |                                                                                                                         |        |        |      |   |   |   |       |       |       |       |       |       |       |          |
|--------------------------------------------------|-------------------------------------------------------------------------------------------------------------------------|--------|--------|------|---|---|---|-------|-------|-------|-------|-------|-------|-------|----------|
| cds.Camellia_sinensis.comp3085_1_c0_seq2_m.31785 | PREDICT<br>ED:<br>ubiquitin<br>carboxyl-<br>terminal<br>hydrolase<br>3-like<br>isoform<br>X2<br>[Gossypium<br>arboreum] | 29.536 | 6.4599 | 13.8 | 4 | 4 | 4 | 0.989 | 0.958 | 0.989 | 1.016 | 0.996 | 1.028 | 1.035 | 6.85E-02 |
| cds.Camellia_sinensis.comp3085_2_c0_seq2_m.34274 | PREDICT<br>ED:<br>protein<br>TONNEAU 1a-like<br>[Juglans<br>regia]                                                      | 29.734 | 3.5112 | 5.6  | 1 | 1 | 1 |       |       |       |       |       |       |       |          |
| cds.Camellia_sinensis.comp3085_7_c0_seq1_m.28428 | PREDICT<br>ED:<br>glutamyl-<br>tRNA<br>reductase-<br>binding<br>protein,<br>chloroplast<br>ic [Vitis<br>vinifera]       | 41.468 | 19.28  | 9.4  | 2 | 2 | 2 | 1.138 | 1.01  | 1.041 | 0.891 | 0.956 | 0.942 | 0.875 | 3.32E-02 |

|                                                  |                                                                                                                 |        |        |      |   |    |   |       |       |       |       |       |       |       |          |
|--------------------------------------------------|-----------------------------------------------------------------------------------------------------------------|--------|--------|------|---|----|---|-------|-------|-------|-------|-------|-------|-------|----------|
| cds.Camellia_sinensis.comp3087_6_c0_seq1_m.20229 | PREDICTED:<br>protein<br>PLASTID<br>TRANSCRIPTION<br>ALLY<br>ACTIVE<br>14 isoform<br>X1<br>[Ziziphus<br>jujuba] | 38.586 | 1.2437 | 2.1  | 1 | 1  | 1 | 1.046 | 0.969 | 1.023 | 0.957 | 0.968 | 1.037 | 0.975 | 4.94E-01 |
| cds.Camellia_sinensis.comp3087_8_c1_seq5_m.46877 | PREDICTED:<br>probable<br>histone<br>H2B.1<br>[Juglans<br>regia]                                                | 16.206 | 31.564 | 48   | 8 | 37 | 8 | 1.153 | 1.132 | 1.096 | 0.844 | 0.846 | 0.882 | 0.761 | 1.83E-04 |
| cds.Camellia_sinensis.comp3087_9_c0_seq1_m.36130 | PREDICTED:<br>probable<br>carboxyl<br>terase 12<br>[Populus<br>euphratica]                                      | 14.235 | 7.1361 | 19.5 | 2 | 3  | 2 |       |       |       |       |       |       |       |          |
| cds.Camellia_sinensis.comp3089_4_c0_seq1_m.34389 | PREDICTED:<br>HD<br>domain-<br>containing<br>protein 2<br>[Jatropha<br>curcas]                                  | 28.86  | 9.9453 | 12.9 | 3 | 4  | 3 | 1.103 | 1.058 | 1.004 | 0.964 | 0.959 | 0.941 | 0.905 | 2.44E-02 |

|                                |                                                                                       |        |        |      |    |    |    |       |       |       |       |       |       |       |          |
|--------------------------------|---------------------------------------------------------------------------------------|--------|--------|------|----|----|----|-------|-------|-------|-------|-------|-------|-------|----------|
| cds.Camellia_sinensis.comp3089 | PREDICT<br>ED:<br>phosphoinositide phospholipase C 2<br>[Vitis vinifera]              | 52.253 | 1.1818 | 2    | 1  | 1  | 1  |       |       |       |       |       |       |       |          |
| cds.Camellia_sinensis.comp3090 | PREDICT<br>ED:<br>leucine-rich repeat extensin-like protein 3<br>[Populus euphratica] | 42.521 | 1.5575 | 2.4  | 1  | 1  | 1  | 1.1   | 1.021 | 1.041 | 0.955 | 0.924 | 0.946 | 0.893 | 1.00E-02 |
| cds.Camellia_sinensis.comp3090 | PREDICT<br>ED:<br>callose synthase 10<br>[Nicotiana attenuata]                        | 218.2  | 12.501 | 4.2  | 7  | 8  | 6  | 0.999 | 1.005 | 1.06  | 0.975 | 0.936 | 1.065 | 0.971 | 5.16E-01 |
| cds.Camellia_sinensis.comp3090 | PREDICT<br>ED: NHL repeat-containing protein 2<br>[Ziziphus jujuba]                   | 118.82 | 213.3  | 23.4 | 22 | 38 | 22 | 0.978 | 0.99  | 0.989 | 1     | 1.01  | 1     | 1.018 | 2.57E-02 |



|                                |                   |                                                                                        |        |        |      |    |    |    |       |       |       |       |       |       |       |          |
|--------------------------------|-------------------|----------------------------------------------------------------------------------------|--------|--------|------|----|----|----|-------|-------|-------|-------|-------|-------|-------|----------|
| cds.Camellia_sinensis.comp3093 | 9_c0_seq1_m.5099  | PREDICTED:<br>vacuolar protein 8<br>[Theobroma cacao]                                  | 23.045 | 32.641 | 16.7 | 3  | 4  | 3  | 0.996 | 1.004 | 1.053 | 1.032 | 0.965 | 0.958 | 0.968 | 3.26E-01 |
| cds.Camellia_sinensis.comp3094 | 1_c0_seq1_m.40634 | PREDICTED:<br>germin-like protein subfamily 1 member 13<br>[Theobroma cacao]           | 24.269 | 89.566 | 33.9 | 6  | 24 | 6  | 1.022 | 0.994 | 0.984 | 0.989 | 1.022 | 1.003 | 1.005 | 7.67E-01 |
| cds.Camellia_sinensis.comp3094 | 3_c0_seq1_m.12978 | PREDICTED:<br>conserved oligomeric Golgi complex subunit 8 isoform X1 [Vitis vinifera] | 63.983 | 1.4449 | 1.6  | 1  | 1  | 1  | 1     | 0.993 | 1.025 | 0.961 | 1.064 | 0.965 | 0.991 | 7.80E-01 |
| cds.Camellia_sinensis.comp3094 | 6_c0_seq1_m.27209 | PREDICTED:<br>ribokinase-like<br>[Malus domestica]                                     | 40.011 | 77.722 | 34.7 | 11 | 18 | 11 | 0.974 | 1.029 | 1.012 | 1.051 | 0.985 | 1.003 | 1.008 | 7.72E-01 |

|                                                  |                                                                                       |        |        |      |   |    |   |       |       |       |       |       |       |       |          |
|--------------------------------------------------|---------------------------------------------------------------------------------------|--------|--------|------|---|----|---|-------|-------|-------|-------|-------|-------|-------|----------|
| cds.Camellia_sinensis.comp3095_3_c0_seq1_m.24684 | Serine/Threonine-kinase STN7, related protein, putative [Medicago truncatula] Protein | 31.109 | 30.704 | 24.1 | 7 | 11 | 7 | 0.956 | 0.985 | 1.021 | 1.022 | 1.031 | 1     | 1.031 | 2.21E-01 |
| cds.Camellia_sinensis.comp3095_3_c0_seq1_m.24686 | kinase superfamily protein [Arabidopsis thaliana] lipase                              | 14.099 | 4.4485 | 7.8  | 1 | 4  | 1 | 1.003 | 1.002 | 0.988 | 0.964 | 1.049 | 1.042 | 1.021 | 5.12E-01 |
| cds.Camellia_sinensis.comp3096_2_c0_seq4_m.19169 | class 3 family protein [Populus trichocarpa] PREDICTED: uncharacterized               | 51.044 | 1.8008 | 5.3  | 3 | 3  | 3 | 1.014 | 0.942 | 1.023 | 0.961 | 1.041 | 1.028 | 1.017 | 6.61E-01 |
| cds.Camellia_sinensis.comp3097_4_c0_seq1_m.26333 | oxidoreductase At1g06690, chloroplastic [Vitis vinifera]                              | 26.481 | 135.54 | 31.1 | 6 | 12 | 6 | 1.037 | 1.052 | 1.031 | 0.952 | 0.984 | 0.916 | 0.914 | 1.38E-02 |

|                                                  |                                                                                              |        |        |      |    |    |    |       |       |       |       |       |       |       |          |
|--------------------------------------------------|----------------------------------------------------------------------------------------------|--------|--------|------|----|----|----|-------|-------|-------|-------|-------|-------|-------|----------|
| cds.Camellia_sinensis.comp3097_4_c0_seq1_m.26334 | uncharacterized oxidoreductase<br>At1g06690,<br>chloroplastic [Ananas comosus]<br>PREDICTED: | 18.519 | 51.341 | 40.7 | 7  | 11 | 7  | 1.021 | 1.019 | 1.044 | 0.991 | 0.966 | 0.956 | 0.945 | 1.24E-02 |
| cds.Camellia_sinensis.comp3097_5_c1_seq2_m.19937 | flavin-dependent oxidoreductase<br>FOX1-like [Nicotiana tomentosiformis]<br>PREDICTED:       | 62.388 | 28.149 | 17.7 | 9  | 11 | 9  | 1.033 | 1.058 | 1.102 | 0.94  | 0.921 | 0.89  | 0.862 | 3.82E-03 |
| cds.Camellia_sinensis.comp3097_9_c1_seq1_m.25752 | ED: GDP-mannose 3,5-epimerase 2 [Juglans regia]<br>PREDICTED: 50S                            | 42.404 | 114.48 | 42.8 | 16 | 32 | 16 | 1.051 | 1.039 | 1.041 | 0.939 | 0.952 | 0.949 | 0.907 | 5.90E-05 |
| cds.Camellia_sinensis.comp3098_0_c0_seq2_m.28639 | ribosomal protein L24,<br>chloroplastic [Sesamum indicum]                                    | 19.973 | 7.8095 | 12.4 | 2  | 3  | 2  | 1.189 | 1.116 | 1.18  | 0.773 | 0.857 | 0.836 | 0.708 | 7.21E-04 |

|                                |                                                                           |        |        |      |   |    |   |       |       |       |       |       |       |       |          |
|--------------------------------|---------------------------------------------------------------------------|--------|--------|------|---|----|---|-------|-------|-------|-------|-------|-------|-------|----------|
| cds.Camellia_sinensis.comp3098 | PREDICT<br>ED: outer envelope protein 64, mitochondrial [Jatropha curcas] | 66.511 | 3.3038 | 2.5  | 1 | 1  | 1 |       |       |       |       |       |       |       |          |
| cds.Camellia_sinensis.comp3099 | PREDICT<br>ED: HMG-Y-related protein A-like [Raphanus sativus]            | 20.266 | 9.7131 | 34.7 | 6 | 13 | 1 |       |       |       |       |       |       |       |          |
| cds.Camellia_sinensis.comp3099 | PREDICT<br>ED: HMG-Y-related protein A-like [Raphanus sativus]            | 19.574 | 49.648 | 32.3 | 6 | 14 | 1 | 1.251 | 1.197 | 1.148 | 0.771 | 0.811 | 0.758 | 0.651 | 1.80E-04 |
| cds.Camellia_sinensis.comp3099 | PREDICT<br>ED: AP-1 complex subunit sigma-1 [Sesamum indicum]             | 18.659 | 20.684 | 13.7 | 2 | 3  | 2 | 1.007 | 0.945 | 1.055 | 1.006 | 1.033 | 1.046 | 1.026 | 4.78E-01 |
| cds.Camellia_sinensis.comp3100 | PREDICT<br>ED: peptide deformylase 1B, chloroplastic [Vitis vinifera]     | 30.703 | 17.829 | 30.4 | 7 | 7  | 7 | 0.99  | 1.057 | 1.01  | 1.054 | 1.01  | 0.926 | 0.978 | 6.16E-01 |



|                                |                                                                                      |        |        |      |    |     |    |       |       |       |       |       |       |       |          |
|--------------------------------|--------------------------------------------------------------------------------------|--------|--------|------|----|-----|----|-------|-------|-------|-------|-------|-------|-------|----------|
| cds.Camellia_sinensis.comp3100 | PREDICT<br>ED: ras-related protein RABA1d [Vitis vinifera]                           | 24.186 | 13.307 | 36.2 | 7  | 14  | 2  | 1.068 | 0.952 | 0.925 | 1.016 | 0.998 | 1.045 | 1.039 | 4.35E-01 |
| cds.Camellia_sinensis.comp3101 | PREDICT<br>ED: eukaryotic translation initiation factor 3 subunit C [Vitis vinifera] | 107.04 | 35.83  | 10.4 | 10 | 10  | 10 | 1.015 | 1.042 | 0.993 | 0.979 | 0.974 | 1.038 | 0.981 | 4.69E-01 |
| cds.Camellia_sinensis.comp3101 | cytochrome f (chloroplast) [Camellia crapnelliana]                                   | 35.219 | 224.34 | 55.9 | 14 | 74  | 14 | 0.996 | 0.969 | 0.977 | 0.987 | 1.01  | 1.023 | 1.027 | 1.20E-01 |
| cds.Camellia_sinensis.comp3102 | peroxisomal (S)-2-hydroxyacid oxidase GLO1 isoform X1 [Cajanus cajan]                | 40.676 | 271.35 | 60.7 | 18 | 107 | 3  | 0.992 | 0.955 | 0.943 | 1.027 | 1.028 | 1.048 | 1.074 | 1.27E-02 |

|                                                  |                                                                                                                                                                                               |        |        |      |    |     |   |       |       |       |       |       |       |       |          |
|--------------------------------------------------|-----------------------------------------------------------------------------------------------------------------------------------------------------------------------------------------------|--------|--------|------|----|-----|---|-------|-------|-------|-------|-------|-------|-------|----------|
| cds.Camellia_sinensis.comp3102_2_c0_seq2_m.27008 | peroxisomal (S)-2-hydroxyacid oxidase GLO1 isoform X1 [Cajanus cajan] PREDICTED: SNARE-interacting protein                                                                                    | 40.384 | 126.99 | 60.5 | 17 | 103 | 2 | 0.996 | 0.981 | 1.011 | 1.02  | 1.043 | 1.007 | 1.027 | 1.15E-01 |
| cds.Camellia_sinensis.comp3102_7_c0_seq1_m.11356 | KEULE-like isoform X2 [Nicotiana tabacum] PREDICTED: alpha-N-acetylglucosaminidase isoform X1 [Vitis vinifera] PREDICTED: probable lactoylglutathione lyase, chloroplastic [Nelumbo nucifera] | 42.91  | 1.1947 | 1.9  | 1  | 1   | 1 | 1.036 | 1.013 | 0.948 | 0.979 | 1.038 | 0.99  | 1.003 | 9.14E-01 |
| cds.Camellia_sinensis.comp3103_1_c0_seq1_m.9294  | acetylglucosaminidase isoform X1 [Vitis vinifera] PREDICTED: probable lactoylglutathione lyase, chloroplastic [Nelumbo nucifera]                                                              | 92.124 | 39.215 | 12.5 | 9  | 9   | 9 | 1.024 | 0.952 | 1.009 | 0.974 | 0.998 | 0.991 | 0.993 | 7.81E-01 |
| cds.Camellia_sinensis.comp3103_5_c0_seq1_m.19017 | probable lactoylglutathione lyase, chloroplastic [Nelumbo nucifera]                                                                                                                           | 41.181 | 32.549 | 30.7 | 11 | 48  | 2 | 1.006 | 0.905 | 0.946 | 1.075 | 1.092 | 1.05  | 1.126 | 2.17E-02 |

|                                                  |                                                                    |        |        |      |    |    |    |       |       |       |       |       |       |       |          |
|--------------------------------------------------|--------------------------------------------------------------------|--------|--------|------|----|----|----|-------|-------|-------|-------|-------|-------|-------|----------|
|                                                  | PREDICT                                                            |        |        |      |    |    |    |       |       |       |       |       |       |       |          |
|                                                  | ED:                                                                |        |        |      |    |    |    |       |       |       |       |       |       |       |          |
| cds.Camellia_sinensis.comp3103_5_c0_seq2_m.20044 | probable lactoylglutathione lyase, chloroplastic [Prunus mume]     | 40.353 | 11.947 | 31.3 | 11 | 45 | 2  | 1.025 | 0.971 | 0.919 | 0.972 | 1.032 | 1.089 | 1.061 | 2.63E-01 |
|                                                  | PREDICT                                                            |        |        |      |    |    |    |       |       |       |       |       |       |       |          |
|                                                  | ED:                                                                |        |        |      |    |    |    |       |       |       |       |       |       |       |          |
|                                                  | probable                                                           |        |        |      |    |    |    |       |       |       |       |       |       |       |          |
| cds.Camellia_sinensis.comp3105_0_c0_seq2_m.27451 | isoaspartyl peptidase/L-asparaginase 3 isoform X2 [Vitis vinifera] | 27.187 | 6.2571 | 4.8  | 1  | 1  | 1  | 1.092 | 1.078 | 1.017 | 0.899 | 0.988 | 0.91  | 0.878 | 2.37E-02 |
| cds.Camellia_sinensis.comp3105_2_c0_seq1_m.33192 | trigger factor [Arabidopsis thaliana]                              | 23.356 | 7.5921 | 9.9  | 2  | 4  | 2  | 0.865 | 0.911 | 0.937 | 1.09  | 1.216 | 1.03  | 1.23  | 1.93E-02 |
|                                                  | PREDICT                                                            |        |        |      |    |    |    |       |       |       |       |       |       |       |          |
|                                                  | ED:                                                                |        |        |      |    |    |    |       |       |       |       |       |       |       |          |
|                                                  | glutathione S-transferase L3 isoform X1 [Vitis vinifera]           |        |        |      |    |    |    |       |       |       |       |       |       |       |          |
| cds.Camellia_sinensis.comp3105_4_c0_seq1_m.44381 |                                                                    | 18.406 | 10.927 | 22.6 | 5  | 8  | 5  | 1.12  | 1.064 | 1.083 | 0.907 | 0.894 | 0.899 | 0.826 | 2.60E-04 |
|                                                  | PREDICT                                                            |        |        |      |    |    |    |       |       |       |       |       |       |       |          |
|                                                  | ED:                                                                |        |        |      |    |    |    |       |       |       |       |       |       |       |          |
| cds.Camellia_sinensis.comp3105_8_c0_seq1_m.3937  | aconitate hydratase, cytoplasmic [Citrus sinensis]                 | 108.76 | 145.83 | 32.1 | 30 | 67 | 15 | 0.971 | 0.989 | 0.963 | 1.013 | 1.024 | 1.054 | 1.057 | 1.72E-02 |

|                                                 |                                                                                                                                                       |        |        |      |    |    |    |       |       |       |       |       |       |       |          |
|-------------------------------------------------|-------------------------------------------------------------------------------------------------------------------------------------------------------|--------|--------|------|----|----|----|-------|-------|-------|-------|-------|-------|-------|----------|
| cds.Camellia_sinensis.comp31058_c0_seq2_m.10105 | PREDICT<br>ED:<br>aconitate<br>hydratase,<br>cytoplasmic<br>[Nelumbo<br>nucifera]<br>PREDICT<br>ED:<br>pentatricop<br>eptide                          | 73.651 | 146.52 | 36.5 | 21 | 58 | 14 | 0.978 | 0.999 | 0.946 | 1.015 | 1.034 | 1.039 | 1.056 | 3.39E-02 |
| cds.Camellia_sinensis.comp31060_c0_seq1_m.3230  | repeat-<br>containing<br>protein<br>MRL1,<br>chloroplast<br>ic isoform<br>X1 [Vitis<br>vinifera]<br>PREDICT<br>ED:<br>serine/thre<br>onine<br>protein | 126.72 | 4.6739 | 2.4  | 3  | 3  | 3  | 1.072 | 1.052 | 1.033 | 1.009 | 0.888 | 0.939 | 0.898 | 4.79E-02 |
| cds.Camellia_sinensis.comp31061_c0_seq1_m.10833 | phosphatas<br>e 2A 57<br>kDa<br>regulatory<br>subunit B'<br>theta<br>isoform<br>isoform<br>X1 [Vitis<br>vinifera]                                     | 58.796 | 2.6477 | 3.5  | 2  | 2  | 2  | 0.975 | 0.946 | 0.938 | 1.009 | 1.079 | 1.072 | 1.105 | 1.49E-02 |

|                                                  |                                                                                                                                    |        |        |      |   |   |   |       |       |       |       |       |       |       |          |
|--------------------------------------------------|------------------------------------------------------------------------------------------------------------------------------------|--------|--------|------|---|---|---|-------|-------|-------|-------|-------|-------|-------|----------|
| cds.Camellia_sinensis.comp3106_2_c0_seq1_m.26787 | PREDICTED: 3-dehydroquininate synthase homolog isoform X4 [Ziziphus jujuba]                                                        | 39.34  | 12.504 | 14.3 | 5 | 5 | 5 | 0.971 | 1.007 | 1.007 | 0.984 | 1.01  | 0.954 | 0.988 | 5.72E-01 |
| cds.Camellia_sinensis.comp3106_6_c0_seq1_m.29752 | PREDICTED: alanine--tRNA ligase isoform X1 [Citrus sinensis] DCD (development and cell death) domain protein [Medicago truncatula] | 29.293 | 1.5211 | 3.8  | 1 | 1 | 1 |       |       |       |       |       |       |       |          |
| cds.Camellia_sinensis.comp3106_8_c0_seq1_m.13277 | PREDICTED: protein S-acyltransferase 8 [Ricinus communis]                                                                          | 44.829 | 3.814  | 2.5  | 1 | 1 | 1 | 1.041 | 1.134 | 1.183 | 0.824 | 0.838 | 0.951 | 0.778 | 1.29E-02 |
| cds.Camellia_sinensis.comp3106_9_c0_seq1_m.10638 | PREDICTED: diacylglycerol kinase 7-like [Citrus sinensis]                                                                          | 48.481 | 7.3907 | 7.8  | 3 | 4 | 3 | 1.141 | 1.07  | 1.152 | 0.877 | 0.871 | 0.876 | 0.78  | 8.72E-03 |
| cds.Camellia_sinensis.comp3107_4_c0_seq1_m.17913 |                                                                                                                                    | 53.405 | 14.843 | 10.4 | 4 | 4 | 2 | 0.903 | 1.018 | 0.989 | 0.948 | 1.053 | 1.108 | 1.068 | 3.26E-01 |

|                                                  |                                                                                                           |        |        |      |    |    |   |       |       |       |       |       |       |       |          |
|--------------------------------------------------|-----------------------------------------------------------------------------------------------------------|--------|--------|------|----|----|---|-------|-------|-------|-------|-------|-------|-------|----------|
| cds.Camellia_sinensis.comp3107_4_c0_seq2_m.26304 | PREDICT<br>ED:<br>diacylglycerol kinase 7-like<br>[Citrus sinensis]                                       | 54.448 | 13.571 | 11.6 | 5  | 6  | 3 | 0.94  | 0.996 | 0.976 | 1.01  | 1.036 | 1.07  | 1.07  | 4.66E-02 |
| cds.Camellia_sinensis.comp3107_6_c0_seq1_m.8629  | Delta(24)-sterol reductase<br>[Morus notabilis]                                                           | 72.586 | 13.681 | 6.2  | 4  | 4  | 4 | 1.123 | 1.1   | 1.117 | 0.892 | 0.895 | 0.852 | 0.79  | 1.59E-04 |
| cds.Camellia_sinensis.comp3108_4_c0_seq8_m.39802 | universal stress family protein<br>[Medicago truncatula]                                                  | 25.319 | 17.318 | 12.6 | 3  | 8  | 3 | 0.965 | 1.014 | 0.921 | 1.048 | 1.016 | 1.03  | 1.067 | 8.84E-02 |
| cds.Camellia_sinensis.comp3108_5_c0_seq1_m.15362 | PREDICT<br>ED: D-3-phosphoglycerate dehydrogenase 1, chloroplastic-like<br>[Daucus carota subsp. sativus] | 63.01  | 123.93 | 19.9 | 11 | 24 | 8 | 0.966 | 0.976 | 0.992 | 1.018 | 0.999 | 1.028 | 1.038 | 3.13E-02 |
| cds.Camellia_sinensis.comp3108_5_c0_seq3_m.50077 | PREDICT<br>ED:<br>keratin, type I cytoskeletal 19 isoform X1<br>[Arachis ipaensis]                        | 21.85  | 3.3421 | 13.2 | 3  | 4  | 3 | 0.969 | 1.037 | 0.978 | 1.035 | 0.964 | 1.049 | 1.021 | 5.68E-01 |

|                                                  |                                                                               |        |        |      |   |   |   |       |       |       |       |       |       |       |          |
|--------------------------------------------------|-------------------------------------------------------------------------------|--------|--------|------|---|---|---|-------|-------|-------|-------|-------|-------|-------|----------|
| cds.Camellia_sinensis.comp3109_0_c0_seq1_m.34311 | catalytic/coenzyme binding protein [Arabidopsis lyrata subsp. lyrata]         | 30.637 | 14.714 | 6.4  | 2 | 3 | 2 | 0.938 | 1.047 | 1.023 | 1.031 | 1.009 | 0.97  | 1.001 | 9.71E-01 |
| cds.Camellia_sinensis.comp3109_1_c0_seq2_m.31417 | hydroxyproline-rich glycoprotein [Populus trichocarpa]                        | 15.83  | 1.7763 | 7.5  | 1 | 1 | 1 | 0.924 | 1.084 | 0.997 | 0.967 | 0.89  | 1.147 | 1     | 9.67E-01 |
| cds.Camellia_sinensis.comp3109_5_c0_seq1_m.26137 | WRKY transcription factor 11-2, putative [Medicago truncatula]                | 45.815 | 9.9485 | 10.2 | 4 | 7 | 4 | 1.004 | 0.972 | 1.034 | 1.028 | 1.039 | 1.012 | 1.023 | 3.03E-01 |
| cds.Camellia_sinensis.comp3109_6_c0_seq2_m.15188 |                                                                               | 14.195 | -2     | 6.6  | 1 | 1 | 1 | 0.984 | 0.925 | 0.958 | 1.083 | 0.988 | 1.084 | 1.1   | 5.57E-02 |
| cds.Camellia_sinensis.comp3109_8_c1_seq1_m.15559 | PREDICTED: violaxanthin de-epoxidase, chloroplastic-like [Populus euphratica] | 61.45  | 9.9885 | 3.7  | 2 | 2 | 2 | 0.996 | 1.079 | 1.107 | 0.959 | 0.967 | 0.892 | 0.886 | 4.14E-02 |

|                                                 |                                                                              |        |        |      |    |    |    |       |       |       |       |       |       |       |          |
|-------------------------------------------------|------------------------------------------------------------------------------|--------|--------|------|----|----|----|-------|-------|-------|-------|-------|-------|-------|----------|
| cds.Camellia_sinensis.comp31113_c0_seq1_m.22495 | PREDICT<br>ED:<br>ureidoglycolate hydrolase [Juglans regia]                  | 53.52  | 66.838 | 17.6 | 7  | 19 | 7  | 0.949 | 0.934 | 0.92  | 1.065 | 1.08  | 1.052 | 1.141 | 3.61E-04 |
| cds.Camellia_sinensis.comp31119_c0_seq1_m.23072 | PREDICT<br>ED: UDP-glycosyltransferase 74E2-like isoform X1 [Juglans regia]  | 54.517 | 2.6303 | 3.7  | 2  | 2  | 2  | 1.212 | 1.119 | 1.041 | 0.838 | 0.855 | 0.89  | 0.766 | 5.00E-03 |
| cds.Camellia_sinensis.comp31127_c0_seq1_m.6174  | PREDICT<br>ED:<br>chaperone protein ClpB1 [Nicotiana tabacum]                | 101.46 | 225.87 | 36.4 | 30 | 39 | 28 | 0.994 | 1.028 | 1.024 | 0.973 | 0.984 | 0.988 | 0.967 | 4.38E-02 |
| cds.Camellia_sinensis.comp31129_c0_seq1_m.4353  | PREDICT<br>ED:<br>intracellular transport protein USO1 [Nicotiana attenuata] | 75.838 | 43.291 | 20.8 | 15 | 17 | 15 | 0.999 | 1.031 | 1.047 | 0.988 | 0.962 | 0.979 | 0.952 | 3.63E-02 |
| cds.Camellia_sinensis.comp31133_c0_seq1_m.12936 | PREDICT<br>ED:<br>pyruvate decarboxylase 1 [Gossypium arboreum]              | 63.495 | 25.612 | 13.4 | 7  | 10 | 5  | 0.861 | 0.93  | 0.89  | 1.157 | 1.064 | 1.105 | 1.241 | 2.82E-03 |



|                                                  |                                                                                               |        |        |      |    |    |    |       |       |       |       |       |       |       |          |
|--------------------------------------------------|-----------------------------------------------------------------------------------------------|--------|--------|------|----|----|----|-------|-------|-------|-------|-------|-------|-------|----------|
| cds.Camellia_sinensis.comp3113_5_c1_seq1_m.30434 | PREDICT<br>ED:<br>methyl-CpG-binding domain-containing protein 11 isoform X1 [Vitis vinifera] | 37.597 | 159.77 | 62.2 | 20 | 32 | 18 | 1.134 | 1.121 | 1.096 | 0.874 | 0.866 | 0.889 | 0.785 | 4.15E-05 |
| cds.Camellia_sinensis.comp3113_5_c2_seq2_m.13406 | PREDICT<br>ED: long chain acyl-CoA synthetase 1 [Sesamum indicum]                             | 74.769 | 7.8079 | 7.4  | 5  | 5  | 5  | 1.103 | 1.245 | 1.211 | 0.907 | 0.831 | 0.668 | 0.676 | 1.53E-02 |
| cds.Camellia_sinensis.comp3113_6_c0_seq1_m.35724 | PREDICT<br>ED: 30S ribosomal protein S6 alpha, chloroplastic [Vitis vinifera]                 | 28.105 | 9.1059 | 10.6 | 2  | 7  | 2  | 1.021 | 1.028 | 1.015 | 0.974 | 0.953 | 0.984 | 0.95  | 7.16E-03 |
| cds.Camellia_sinensis.comp3113_9_c0_seq6_m.36886 | PREDICT<br>ED:<br>putative RNA-binding protein YlmH [Theobroma cacao]                         | 17.281 | 2.0955 | 4.3  | 1  | 1  | 1  | 0.978 | 1.015 | 0.99  | 1.004 | 1.037 | 0.989 | 1.016 | 4.30E-01 |



|                                                 |                                                                                   |        |        |      |    |    |    |       |       |       |       |       |       |       |          |
|-------------------------------------------------|-----------------------------------------------------------------------------------|--------|--------|------|----|----|----|-------|-------|-------|-------|-------|-------|-------|----------|
| cds.Camellia_sinensis.comp31170_c0_seq2_m.13451 | PREDICT<br>ED: D-2-hydroxyglutarate dehydrogenase, mitochondrial [Vitis vinifera] | 65.442 | 13.703 | 10.3 | 7  | 11 | 7  | 1.014 | 1.014 | 1.069 | 0.983 | 0.986 | 0.959 | 0.945 | 4.69E-02 |
| cds.Camellia_sinensis.comp31171_c0_seq1_m.26823 | PREDICT<br>ED: IST1 homolog [Solanum pennellii]                                   | 36.274 | 44.124 | 27.6 | 8  | 12 | 8  | 0.96  | 0.977 | 1.004 | 1.063 | 0.971 | 1.047 | 1.048 | 2.11E-01 |
| cds.Camellia_sinensis.comp31172_c0_seq1_m.3334  | PREDICT<br>ED: exocyst complex component SEC8 [Vitis vinifera]                    | 119.3  | 55.8   | 12.2 | 10 | 10 | 10 | 1.028 | 0.971 | 0.988 | 1.004 | 1.03  | 0.96  | 1.002 | 9.38E-01 |
| cds.Camellia_sinensis.comp31173_c0_seq2_m.31664 | PREDICT<br>ED: sanguinarine reductase isoform X1 [Citrus sinensis]                | 36.914 | 92.17  | 32.4 | 11 | 17 | 11 | 1.033 | 0.987 | 1.018 | 1.022 | 0.977 | 0.966 | 0.976 | 3.26E-01 |



|                                                  |                                                                                                                           |        |        |      |    |    |    |       |       |       |       |       |       |       |          |
|--------------------------------------------------|---------------------------------------------------------------------------------------------------------------------------|--------|--------|------|----|----|----|-------|-------|-------|-------|-------|-------|-------|----------|
| cds.Camellia_sinensis.comp3118_6_c0_seq1_m.26570 | PREDICTED:<br>magnesium-protoporphyrin IX monomethyl ester [oxidative] cyclase, chloroplastic isoform X2[Ziziphus jujuba] | 48.864 | 61.529 | 33.6 | 15 | 25 | 15 | 1.044 | 1.044 | 1.018 | 0.971 | 0.951 | 0.937 | 0.92  | 3.40E-03 |
| cds.Camellia_sinensis.comp3118_6_c1_seq1_m.18514 | PREDICTED:<br>UDP-glucose 6-dehydrogenase 1 [Vitis vinifera]                                                              | 52.995 | 134.97 | 41   | 16 | 30 | 16 | 1.022 | 1.017 | 0.996 | 0.99  | 0.985 | 0.991 | 0.977 | 4.76E-02 |
| cds.Camellia_sinensis.comp3118_7_c0_seq1_m.29494 | PREDICTED:<br>vesicle-associated protein 1-2 [Theobroma cacao]                                                            | 35.307 | 21.629 | 14.9 | 5  | 9  | 4  | 1.03  | 0.993 | 1.02  | 1.071 | 0.976 | 0.968 | 0.991 | 7.81E-01 |
| cds.Camellia_sinensis.comp3118_7_c0_seq2_m.31271 | PREDICTED:<br>vesicle-associated protein 1-2 [Theobroma cacao]                                                            | 35.21  | 26.434 | 15.2 | 6  | 10 | 5  | 0.963 | 1.094 | 0.937 | 0.963 | 1.004 | 1.025 | 0.999 | 9.81E-01 |

|                                                  |                                                                                 |        |        |      |   |    |   |       |       |       |       |       |       |       |          |
|--------------------------------------------------|---------------------------------------------------------------------------------|--------|--------|------|---|----|---|-------|-------|-------|-------|-------|-------|-------|----------|
|                                                  | PREDICT<br>ED:                                                                  |        |        |      |   |    |   |       |       |       |       |       |       |       |          |
| cds.Camellia_sinensis.comp3118_8_c0_seq2_m.28517 | pyruvate kinase isozyme A, chloroplastic [Theobroma                             | 41.4   | 21.026 | 21.5 | 7 | 10 | 7 | 0.956 | 1.014 | 1.011 | 1.006 | 0.999 | 1.039 | 1.021 | 4.04E-01 |
|                                                  | PREDICT<br>ED:                                                                  |        |        |      |   |    |   |       |       |       |       |       |       |       |          |
| cds.Camellia_sinensis.comp3118_8_c1_seq1_m.39043 | pyruvate kinase isozyme A, chloroplastic [Vitis                                 | 35.505 | 35.286 | 3.7  | 1 | 3  | 1 | 0.98  | 1.029 | 1.028 | 1.033 | 0.986 | 0.956 | 0.98  | 4.93E-01 |
|                                                  | PREDICT<br>ED:                                                                  |        |        |      |   |    |   |       |       |       |       |       |       |       |          |
| cds.Camellia_sinensis.comp3119_1_c0_seq3_m.14179 | electron transfer flavoprotein-ubiquinone oxidoreductase, mitochondrial isoform | 68.67  | 5.0429 | 5.2  | 3 | 3  | 3 | 0.891 | 0.913 | 1.024 | 1.01  | 1.097 | 1.097 | 1.133 | 6.89E-02 |
|                                                  | PREDICT<br>ED:                                                                  |        |        |      |   |    |   |       |       |       |       |       |       |       |          |
| cds.Camellia_sinensis.comp3119_4_c0_seq1_m.23449 | probable protein phosphatase 2C 76 [Ziziphus jujuba]                            | 43.058 | 3.2678 | 4.9  | 2 | 2  | 2 | 0.969 | 1.052 | 1.101 | 0.949 | 0.875 | 1.054 | 0.922 | 2.75E-01 |

|                                |                   |                                                                                                                                                                                             |        |        |      |    |    |    |       |       |       |       |       |       |       |          |
|--------------------------------|-------------------|---------------------------------------------------------------------------------------------------------------------------------------------------------------------------------------------|--------|--------|------|----|----|----|-------|-------|-------|-------|-------|-------|-------|----------|
| cds.Camellia_sinensis.comp3119 | 8_c0_seq1_m.17489 | PREDICT<br>ED:<br>UPF0051<br>protein<br>ABC18,<br>chloroplast<br>ic [Vitis<br>vinifera]<br>short-chain<br>dehydroge<br>nase/reduc<br>tase family<br>protein<br>[Populus<br>trichocarpa<br>] | 62.134 | 74.416 | 31   | 14 | 19 | 14 | 0.995 | 0.998 | 1.041 | 0.986 | 1.013 | 0.993 | 0.986 | 4.55E-01 |
| cds.Camellia_sinensis.comp3119 | 9_c0_seq1_m.41911 | dehydroge<br>nase/reduc<br>tase family<br>protein<br>[Populus<br>trichocarpa<br>]                                                                                                           | 30.046 | 9.8716 | 14.4 | 5  | 7  | 5  | 0.986 | 0.961 | 0.919 | 1.029 | 1.064 | 1.048 | 1.096 | 1.55E-02 |
| cds.Camellia_sinensis.comp3120 | 5_c0_seq1_m.15992 | PREDICT<br>ED:<br>glutathione<br>reductase,<br>chloroplast<br>ic [Vitis<br>vinifera]                                                                                                        | 60.57  | 129.02 | 35.5 | 16 | 36 | 16 | 0.986 | 0.994 | 0.959 | 1.01  | 1.033 | 1.037 | 1.048 | 2.62E-02 |
| cds.Camellia_sinensis.comp3120 | 5_c1_seq1_m.18720 | PREDICT<br>ED:<br>pectinester<br>ase-like<br>[Populus<br>euphratica]                                                                                                                        | 31.464 | 43.178 | 17.8 | 6  | 14 | 6  | 0.879 | 0.869 | 0.912 | 1.126 | 1.143 | 1.141 | 1.282 | 8.22E-05 |
| cds.Camellia_sinensis.comp3120 | 7_c0_seq1_m.21467 | PREDICT<br>ED: actin-<br>depolymer<br>izing<br>factor 2<br>[Ricinus                                                                                                                         | 16.07  | 11.403 | 41.7 | 4  | 9  | 3  | 1.038 | 1.01  | 1.004 | 0.974 | 0.955 | 1.008 | 0.962 | 1.10E-01 |

|                                                 |                                                                                                       |        |        |      |    |    |    |       |       |       |       |       |       |       |          |
|-------------------------------------------------|-------------------------------------------------------------------------------------------------------|--------|--------|------|----|----|----|-------|-------|-------|-------|-------|-------|-------|----------|
| cds.Camellia_sinensis.comp31210_c0_seq1_m.18091 | PREDICT<br>ED:<br>elongation factor 1-gamma [Vitis vinifera]                                          | 48.228 | 64.061 | 30.3 | 14 | 41 | 14 | 1.068 | 1.034 | 1.035 | 0.942 | 0.956 | 0.954 | 0.909 | 1.20E-03 |
| cds.Camellia_sinensis.comp31217_c0_seq1_m.33570 | PREDICT<br>ED:<br>protein CDI-like [Nicotiana attenuata]                                              | 32.291 | 5.705  | 3.9  | 1  | 1  | 1  |       |       |       |       |       |       |       |          |
| cds.Camellia_sinensis.comp31218_c1_seq1_m.20508 | PREDICT<br>ED:<br>tryptophan --tRNA ligase, chloroplast ic/mitochondrial isoform X1 [Theobroma cacao] | 46.381 | 34.901 | 15.7 | 6  | 7  | 6  | 0.913 | 1.069 | 1.047 | 1.008 | 1.007 | 0.986 | 0.991 | 9.02E-01 |
| cds.Camellia_sinensis.comp31222_c1_seq1_m.35525 | PREDICT<br>ED: rabin-binding protein 1 homolog c-like [Ipomoea nil]                                   | 24.654 | 58.526 | 29.2 | 5  | 7  | 4  | 1.088 | 1.07  | 1.083 | 0.873 | 0.903 | 0.922 | 0.832 | 3.83E-04 |



|                                                  |                                                                              |        |        |      |    |    |   |       |       |       |       |       |       |       |          |
|--------------------------------------------------|------------------------------------------------------------------------------|--------|--------|------|----|----|---|-------|-------|-------|-------|-------|-------|-------|----------|
| cds.Camellia_sinensis.comp3122_2_c2_seq1_m.42949 | PREDICT<br>ED:<br>nucleoside diphosphate kinase B-like<br>[Nelumbo nucifera] | 16.432 | 46.385 | 28.4 | 5  | 10 | 5 | 0.944 | 0.98  | 0.95  | 1.056 | 1.043 | 1.058 | 1.098 | 1.62E-03 |
| cds.Camellia_sinensis.comp3122_2_c4_seq1_m.33714 | 14-3-3 protein<br>[Vitis vinifera]                                           | 29.408 | 102.49 | 54   | 14 | 51 | 8 | 1.049 | 0.983 | 0.995 | 0.977 | 1.014 | 0.999 | 0.988 | 6.24E-01 |
| cds.Camellia_sinensis.comp3122_6_c0_seq1_m.36088 | plant/F21F14-40 protein<br>[Medicago truncatula]                             | 30.12  | 41.57  | 15   | 4  | 11 | 4 | 0.896 | 0.887 | 0.927 | 1.101 | 1.103 | 1.084 | 1.213 | 1.80E-04 |
| cds.Camellia_sinensis.comp3122_6_c1_seq1_m.33340 | PREDICT<br>ED:<br>farnesyl pyrophosphate synthase 1<br>[Arachis duranensis]  | 40.387 | 17.961 | 15.4 | 7  | 13 | 6 | 0.991 | 0.971 | 1.042 | 1.014 | 0.984 | 0.997 | 0.997 | 9.13E-01 |
| cds.Camellia_sinensis.comp3123_6_c0_seq1_m.32178 | PREDICT<br>ED:<br>xanthoxin dehydrogenase-like isoform X1<br>[Juglans regia] | 30.617 | 120.71 | 24   | 6  | 17 | 6 | 0.978 | 0.95  | 0.979 | 1.058 | 1.059 | 1.016 | 1.078 | 1.13E-02 |

|                                                 |                                                                                            |        |        |      |    |    |   |       |       |       |       |       |       |       |          |
|-------------------------------------------------|--------------------------------------------------------------------------------------------|--------|--------|------|----|----|---|-------|-------|-------|-------|-------|-------|-------|----------|
| cds.Camellia_sinensis.comp31237_c0_seq1_m.31685 | mitochondrial outer membrane protein porin of 36 kDa<br>[Solanum tuberosum<br>PREDICTED:   | 29.437 | 102.2  | 46.7 | 11 | 23 | 8 | 1.02  | 1.019 | 1.048 | 0.985 | 0.95  | 0.958 | 0.937 | 1.05E-02 |
| cds.Camellia_sinensis.comp31237_c0_seq2_m.40792 | mitochondrial outer membrane protein porin of 36 kDa<br>[Eucalyptus grandis]<br>PREDICTED: | 22.999 | 3.1935 | 16.4 | 4  | 10 | 1 |       |       |       |       |       |       |       |          |
| cds.Camellia_sinensis.comp31239_c0_seq1_m.8873  | eukaryotic translation initiation factor 3 subunit B<br>[Vitis vinifera]<br>PREDICTED:     | 85.203 | 15.558 | 7    | 5  | 8  | 5 | 0.984 | 1.141 | 1.168 | 0.946 | 0.856 | 0.904 | 0.822 | 3.33E-02 |
| cds.Camellia_sinensis.comp31241_c0_seq2_m.19977 | mitochondrial import inner membrane translocase subunit TIM44-2<br>[Theobroma cacao]       | 61.556 | 3.8747 | 4.3  | 3  | 4  | 3 | 1.075 | 1.121 | 1.119 | 0.872 | 0.902 | 0.916 | 0.811 | 4.75E-04 |

|                                |                                                                                                                     |        |        |      |    |    |    |       |       |       |       |       |       |       |          |
|--------------------------------|---------------------------------------------------------------------------------------------------------------------|--------|--------|------|----|----|----|-------|-------|-------|-------|-------|-------|-------|----------|
| cds.Camellia_sinensis.comp3124 | PREDICT<br>ED: biotin<br>carboxylase 1,<br>chloroplastic<br>[Theobroma cacao]                                       | 58.6   | 56.384 | 32.6 | 16 | 32 | 16 | 1.005 | 1.029 | 1.034 | 0.963 | 0.96  | 0.984 | 0.948 | 1.01E-02 |
| cds.Camellia_sinensis.comp3125 | PREDICT<br>ED:<br>proteasome subunit<br>beta type-5<br>[Gossypium<br>hirsutum]                                      | 29.132 | 41.095 | 19.4 | 6  | 17 | 6  | 0.956 | 0.957 | 0.928 | 1.067 | 1.02  | 1.046 | 1.103 | 4.04E-03 |
| cds.Camellia_sinensis.comp3125 | PREDICT<br>ED:<br>alternative<br>NAD(P)H-ubiquinone<br>oxidoreductase C1,<br>chloroplastic/mitochondrial<br>[Vitis] | 21.814 | 19.284 | 15.5 | 2  | 3  | 2  | 0.946 | 0.915 | 0.965 | 1.103 | 1.091 | 1.01  | 1.134 | 1.70E-02 |
| cds.Camellia_sinensis.comp3125 | PREDICT<br>ED:<br>alternative<br>NAD(P)H-ubiquinone<br>oxidoreductase C1,<br>chloroplastic/mitochondrial<br>[Vitis] | 24.758 | 13.339 | 16.7 | 3  | 4  | 3  | 0.94  | 0.911 | 1.003 | 1.125 | 1.072 | 1.087 | 1.151 | 1.13E-02 |



|                                                  |                                                                                 |        |        |      |   |   |   |       |       |       |       |       |       |       |          |
|--------------------------------------------------|---------------------------------------------------------------------------------|--------|--------|------|---|---|---|-------|-------|-------|-------|-------|-------|-------|----------|
| cds.Camellia_sinensis.comp3126                   | PREDICT<br>ED:<br>ubiquitin-related modifier 1 homolog 2 [Ricinus communis]     | 13.822 | 1.8869 | 12   | 1 | 1 | 1 |       |       |       |       |       |       |       |          |
| cds.Camellia_sinensis.comp3126_9_c0_seq1_m.26183 | plant/T7N 9-9 protein [Medicago truncatula]                                     | 41.753 | 37.484 | 23.9 | 8 | 9 | 8 | 1.011 | 0.978 | 0.977 | 0.968 | 1.033 | 1.019 | 1.018 | 4.78E-01 |
| cds.Camellia_sinensis.comp3127_0_c0_seq2_m.16661 | PREDICT<br>ED:<br>folylpolyglutamate synthase isoform X2 [Vitis vinifera]       | 28.549 | 5.1992 | 6.7  | 2 | 2 | 2 | 0.987 | 0.988 | 1.025 | 1.007 | 1.003 | 1.002 | 1.004 | 7.72E-01 |
| cds.Camellia_sinensis.comp3127_0_c0_seq2_m.16662 | PREDICT<br>ED:<br>folylpolyglutamate synthase-like isoform X1 [Capsicum annuum] | 15.334 | 1.3912 | 7.5  | 1 | 2 | 1 | 0.952 | 1.044 | 1.103 | 1.065 | 0.84  | 1.005 | 0.939 | 4.72E-01 |

|                                                  |                                                                                                        |        |        |      |    |    |    |       |       |       |       |       |       |       |          |
|--------------------------------------------------|--------------------------------------------------------------------------------------------------------|--------|--------|------|----|----|----|-------|-------|-------|-------|-------|-------|-------|----------|
| cds.Camellia_sinensis.comp3127_3_c0_seq1_m.15035 | PREDICT<br>ED: 15-cis-phytoene desaturase, chloroplast<br>ic/chromoplastic isoform X1 [Vitis vinifera] | 64.9   | 45.321 | 23   | 11 | 14 | 11 | 1.035 | 1.039 | 1.065 | 0.956 | 0.925 | 0.965 | 0.907 | 3.30E-03 |
| cds.Camellia_sinensis.comp3127_5_c0_seq1_m.19312 | PREDICT<br>ED: beta-galactosidase-like [Sesamum indicum]                                               | 68.686 | 54.92  | 18.7 | 10 | 21 | 8  | 0.842 | 0.827 | 0.809 | 1.198 | 1.198 | 1.19  | 1.447 | 3.07E-06 |
| cds.Camellia_sinensis.comp3127_6_c0_seq1_m.31390 | PREDICT<br>ED: 2-Cys peroxiredoxin BAS1, chloroplast<br>ic [Juglans regia]                             | 30.692 | 96.646 | 45.7 | 11 | 43 | 3  | 0.918 | 0.934 | 0.963 | 1.084 | 1.069 | 1.023 | 1.128 | 5.74E-03 |
| cds.Camellia_sinensis.comp3127_6_c0_seq2_m.31885 | PREDICT<br>ED: 2-Cys peroxiredoxin BAS1, chloroplast<br>ic [Juglans regia]                             | 29.991 | 20.276 | 31.4 | 9  | 40 | 1  | 1.007 | 0.976 | 1.091 | 0.988 | 0.954 | 0.935 | 0.936 | 1.51E-01 |
| cds.Camellia_sinensis.comp3127_7_c0_seq2_m.35600 | PREDICT<br>ED: mitochondrial import receptor subunit TOM20 [Vitis vinifera]                            | 21.758 | 12.61  | 24.7 | 4  | 4  | 4  | 0.984 | 0.994 | 0.996 | 1.028 | 1.061 | 0.953 | 1.023 | 5.70E-01 |

|                                                  |                                                                                               |        |        |      |    |    |    |       |       |       |       |       |       |       |          |
|--------------------------------------------------|-----------------------------------------------------------------------------------------------|--------|--------|------|----|----|----|-------|-------|-------|-------|-------|-------|-------|----------|
| cds.Camellia_sinensis.comp31278_c0_seq3_m.47850  | PREDICTED:<br>probable NAD(P)H dehydrogenase subunit CRR3, chloroplastic<br>[Capsicum annuum] | 20.739 | 7.3951 | 17.4 | 2  | 2  | 2  |       |       |       |       |       |       |       |          |
| cds.Camellia_sinensis.comp31279_c0_seq2_m.10195  | PREDICTED: IAA-amino acid hydrolase ILR1-like isoform X2<br>[Ziziphus jujuba]                 | 46.935 | 1.2403 | 3.7  | 2  | 2  | 1  | 1.018 | 0.947 | 1.026 | 0.972 | 0.969 | 1.073 | 1.008 | 8.73E-01 |
| cds.Camellia_sinensis.comp31280_c0_seq1_m.12848  | dihydroxy-acid dehydratase-like<br>[Solanum lycopersicum]                                     | 65.943 | 41.388 | 23.3 | 13 | 21 | 13 | 0.943 | 0.96  | 0.949 | 1.064 | 1.065 | 1.035 | 1.109 | 6.40E-04 |
| cds.Camellia_sinensis.comp31287_c0_seq12_m.42513 | PREDICTED: IST1-like protein isoform X1<br>[Jatropha curcas]                                  | 27.878 | 20.126 | 7.7  | 2  | 2  | 2  | 0.91  | 1.275 | 1.033 | 0.94  | 0.858 | 0.98  | 0.863 | 2.60E-01 |





|                                                  |                                                                      |        |        |      |   |    |   |       |       |       |       |       |       |       |          |
|--------------------------------------------------|----------------------------------------------------------------------|--------|--------|------|---|----|---|-------|-------|-------|-------|-------|-------|-------|----------|
| cds.Camellia_sinensis.comp3129_8_c0_seq3_m.21813 | PREDICTED: SH3 domain-containing protein 2-like [Gossypium hirsutum] | 41.041 | 1.7475 | 2.4  | 1 | 1  | 1 | 1.104 | 0.991 | 0.948 | 0.998 | 0.978 | 0.975 | 0.97  | 5.65E-01 |
| cds.Camellia_sinensis.comp3129_8_c0_seq6_m.27802 | PREDICTED: SH3 domain-containing protein 2-like [Ipomoea nil]        | 27.96  | 20.749 | 12.4 | 3 | 3  | 3 | 0.998 | 0.954 | 1.006 | 1.123 | 0.948 | 1.002 | 1.039 | 5.32E-01 |
| cds.Camellia_sinensis.comp3130_5_c0_seq1_m.16175 | PREDICTED: synaptotagmin-5-like [Ziziphus jujuba]                    | 26.531 | 2.5374 | 4.2  | 1 | 2  | 1 | 0.933 | 0.946 | 1     | 1.045 | 1.057 | 1.046 | 1.093 | 1.40E-02 |
| cds.Camellia_sinensis.comp3130_6_c0_seq1_m.29350 | PREDICTED: ferritin isoform X1 [Solanum tuberosum]                   | 28.521 | 42.039 | 24.7 | 4 | 10 | 3 | 1.078 | 1.054 | 1.083 | 0.869 | 0.916 | 0.939 | 0.847 | 2.40E-03 |
| cds.Camellia_sinensis.comp3130_8_c0_seq2_m.19470 | PREDICTED: protein HASTY 1 isoform X4 [Nelumbo nucifera]             | 18.847 | 1.2204 | 12.1 | 2 | 2  | 2 | 1.046 | 0.964 | 1.067 | 0.964 | 1.006 | 0.954 | 0.95  | 2.24E-01 |

|                                                  |                                                                                               |        |        |      |    |    |    |       |       |       |       |       |       |       |          |
|--------------------------------------------------|-----------------------------------------------------------------------------------------------|--------|--------|------|----|----|----|-------|-------|-------|-------|-------|-------|-------|----------|
| cds.Camellia_sinensis.comp3131_0_c0_seq1_m.36302 | PREDICT<br>ED:<br>carbonic anhydrase 2-like<br>[Citrus sinensis]                              | 26.853 | 54.121 | 33.1 | 7  | 14 | 7  | 0.915 | 0.928 | 0.912 | 1.128 | 1.092 | 1.135 | 1.218 | 1.17E-04 |
| cds.Camellia_sinensis.comp3131_3_c0_seq1_m.16545 | PREDICT<br>ED: alpha-1,4 glucan phosphorylase L-2 isozyme, chloroplast<br>[Vitis vinifera]    | 68.013 | 63.367 | 17.4 | 10 | 17 | 8  | 1.002 | 1.002 | 0.999 | 0.975 | 0.976 | 0.987 | 0.978 | 5.64E-03 |
| cds.Camellia_sinensis.comp3131_3_c0_seq4_m.26743 | PREDICT<br>ED: alpha-1,4 glucan phosphorylase L-1 isozyme, chloroplast<br>[Nicotiana tabacum] | 56.271 | 2.0705 | 5.1  | 2  | 2  | 1  |       |       |       |       |       |       |       |          |
| cds.Camellia_sinensis.comp3131_7_c0_seq3_m.29906 | PREDICT<br>ED:<br>sorbitol dehydrogenase<br>[Juglans regia]                                   | 39.421 | 127.55 | 52.3 | 13 | 23 | 12 | 0.927 | 0.972 | 0.953 | 1.046 | 1.044 | 1.03  | 1.094 | 3.50E-03 |



|                                                  |                                                                                                   |        |        |      |   |   |   |       |       |       |       |       |       |       |          |
|--------------------------------------------------|---------------------------------------------------------------------------------------------------|--------|--------|------|---|---|---|-------|-------|-------|-------|-------|-------|-------|----------|
| cds.Camellia_sinensis.comp3135_1_c0_seq2_m.50012 | PREDICT<br>ED: ras-related protein RABH1e [Ipomoea nil]                                           | 11.804 | 1.9129 | 26.6 | 3 | 3 | 1 | 1.025 | 1.049 | 1.066 | 0.957 | 0.941 | 0.958 | 0.91  | 1.76E-03 |
| cds.Camellia_sinensis.comp3135_3_c0_seq4_m.6311  | PREDICT<br>ED: structural maintenance of chromosome protein 2-1-like [Ziziphus jujuba] DNA repair | 33.556 | 18.796 | 19.6 | 7 | 9 | 7 | 1.084 | 1.044 | 1.017 | 0.937 | 0.925 | 0.957 | 0.896 | 6.52E-03 |
| cds.Camellia_sinensis.comp3135_3_c0_seq4_m.6313  | ATPase-related family protein [Populus trichocarpa]                                               | 19.049 | 4.5979 | 17.8 | 2 | 2 | 2 | 1.032 | 1.089 | 1.029 | 1.023 | 0.886 | 0.939 | 0.904 | 8.87E-02 |
| cds.Camellia_sinensis.comp3135_4_c0_seq1_m.36920 | DUF2996 family protein [Medicago truncatula]                                                      | 22.698 | 7.1573 | 22.7 | 4 | 5 | 4 | 1.04  | 1.03  | 0.988 | 0.951 | 1.008 | 1.024 | 0.975 | 4.12E-01 |



|                                                  |                                                                                      |        |        |      |   |    |   |       |       |       |       |       |       |       |          |
|--------------------------------------------------|--------------------------------------------------------------------------------------|--------|--------|------|---|----|---|-------|-------|-------|-------|-------|-------|-------|----------|
| cds.Camellia_sinensis.comp3136_6_c0_seq2_m.41934 | PREDICTED:<br>isocitrate dehydrogenase [NADP] isoform X2<br>[Sesamum indicum]        | 17.381 | 3.7374 | 29.2 | 4 | 10 | 2 | 1.005 | 1.039 | 1.077 | 0.963 | 1.018 | 0.901 | 0.923 | 1.18E-01 |
| cds.Camellia_sinensis.comp3137_4_c0_seq6_m.6902  | PREDICTED:<br>clathrin interactor EPSIN 2<br>[Sesamum indicum]                       | 94.053 | 7.0501 | 1.8  | 1 | 1  | 1 |       |       |       |       |       |       |       |          |
| cds.Camellia_sinensis.comp3137_8_c0_seq1_m.15382 | PREDICTED:<br>LIMR family protein At5g01460 [Citrus sinensis]                        | 56.249 | 2.9756 | 2    | 1 | 2  | 1 | 0.979 | 1.284 | 1.059 | 1.016 | 0.766 | 0.885 | 0.803 | 1.28E-01 |
| cds.Camellia_sinensis.comp3139_3_c0_seq1_m.18843 | PREDICTED:<br>uncharacterized membrane protein At1g16860-like<br>[Solanum tuberosum] | 50.551 | 2.071  | 3.8  | 2 | 2  | 2 | 1.107 | 1.091 | 1.101 | 0.915 | 0.837 | 0.924 | 0.811 | 2.20E-02 |

|                                                  |                                                                                                 |        |        |     |    |    |    |       |       |       |       |       |       |       |          |
|--------------------------------------------------|-------------------------------------------------------------------------------------------------|--------|--------|-----|----|----|----|-------|-------|-------|-------|-------|-------|-------|----------|
| cds.Camellia_sinensis.comp3139_5_c0_seq4_m.41708 | PREDICTED:<br>oxysterol-binding protein-related protein 1C-like isoform X1 [Gossypium arboreum] | 29.284 | 2.2174 | 2.8 | 1  | 2  | 1  | 0.97  | 0.989 | 1.017 | 0.991 | 1.026 | 1.021 | 1.021 | 3.03E-01 |
| cds.Camellia_sinensis.comp3139_7_c0_seq1_m.2604  | PREDICTED:<br>probable manganese transportin PDR2 [Vitis vinifera]                              | 134.73 | 32.351 | 8.3 | 10 | 10 | 10 | 1.025 | 1.043 | 1.108 | 0.899 | 0.942 | 0.953 | 0.88  | 1.24E-02 |
| cds.Camellia_sinensis.comp3139_8_c0_seq4_m.4052  | PREDICTED:<br>peroxisome biogenesis protein 1 isoform X3 [Vitis vinifera]                       | 34.006 | -2     | 2.3 | 1  | 2  | 1  | 1.02  | 1.007 | 1.085 | 0.973 | 0.972 | 0.945 | 0.929 | 4.20E-02 |
| cds.Camellia_sinensis.comp3140_1_c0_seq1_m.25465 | PREDICTED:<br>isopentenyl-diphosphate delta-isomerase [Arabidopsis thaliana]                    | 36.582 | 14.071 | 7.8 | 2  | 3  | 2  | 0.95  | 0.941 | 0.961 | 1.065 | 1.064 | 1.048 | 1.114 | 1.78E-04 |

|                                                  |                                                                                      |        |        |      |   |   |   |       |       |       |       |       |       |       |          |
|--------------------------------------------------|--------------------------------------------------------------------------------------|--------|--------|------|---|---|---|-------|-------|-------|-------|-------|-------|-------|----------|
| cds.Camellia_sinensis.comp3140_2_c0_seq1_m.31439 | PREDICT ED: syntaxin-61 [Vitis vinifera]                                             | 28.189 | 2.1049 | 4    | 1 | 1 | 1 |       |       |       |       |       |       |       |          |
| cds.Camellia_sinensis.comp3140_9_c0_seq1_m.27497 | PREDICT ED: GDP-mannose 4,6 dehydratase 1 [Ipomoea nil]                              | 41.322 | 5.6067 | 11.1 | 5 | 7 | 5 | 1.032 | 1.015 | 1.027 | 0.945 | 0.987 | 0.994 | 0.952 | 4.02E-02 |
| cds.Camellia_sinensis.comp3141_3_c1_seq2_m.24829 | PREDICT ED: macrophage erythroblast attacher [Nelumbo nucifera]                      | 27.524 | 1.8941 | 3.8  | 1 | 1 | 1 | 0.96  | 0.956 | 0.927 | 1.057 | 1.079 | 1.048 | 1.12  | 1.28E-03 |
| cds.Camellia_sinensis.comp3141_3_c1_seq2_m.24830 | PREDICT ED: macrophage erythroblast attacher [Glycine max]                           | 23.826 | 6.2066 | 15   | 4 | 5 | 4 | 0.955 | 0.987 | 0.987 | 1.026 | 0.989 | 1.055 | 1.048 | 9.73E-02 |
| cds.Camellia_sinensis.comp3141_7_c0_seq1_m.11793 | PREDICT ED: acyl-CoA-binding domain-containing protein 4 isoform X1 [Vitis vinifera] | 73.396 | 23.176 | 13.7 | 9 | 9 | 8 | 1.014 | 1.056 | 1.016 | 0.981 | 0.913 | 0.984 | 0.933 | 6.51E-02 |



|                                                  |                                                                                               |        |        |      |    |    |    |       |       |       |       |       |       |       |          |
|--------------------------------------------------|-----------------------------------------------------------------------------------------------|--------|--------|------|----|----|----|-------|-------|-------|-------|-------|-------|-------|----------|
| cds.Camellia_sinensis.comp3142_0_c0_seq2_m.37281 | PREDICT<br>ED: UMP-kinase 3-like<br>[Sesamum indicum]                                         | 23.194 | 6.134  | 12.4 | 3  | 5  | 2  | 1.037 | 1.039 | 1.016 | 1.021 | 0.889 | 0.996 | 0.94  | 2.14E-01 |
| cds.Camellia_sinensis.comp3142_1_c0_seq2_m.20836 | PREDICT<br>ED: ACT domain-containing protein ACR10<br>[Prunus mume]                           | 46.488 | 2.2599 | 3.2  | 1  | 1  | 1  |       |       |       |       |       |       |       |          |
| cds.Camellia_sinensis.comp3142_3_c0_seq1_m.8048  | PREDICT<br>ED: eukaryotic translation initiation factor 3 subunit L-like<br>[Juglans regia]   | 60.856 | 45.063 | 18   | 8  | 11 | 8  | 0.966 | 0.974 | 0.973 | 1.034 | 1.066 | 1.073 | 1.089 | 1.88E-03 |
| cds.Camellia_sinensis.comp3142_8_c0_seq1_m.16859 | PREDICT<br>ED: gamma aminobutyrate transaminase 3, chloroplastic-like<br>[Gossypium hirsutum] | 57.364 | 112.21 | 29.7 | 11 | 26 | 11 | 0.966 | 0.963 | 0.987 | 0.993 | 1.035 | 1.032 | 1.049 | 3.57E-02 |

|                                |                                                                                  |        |        |     |    |    |    |       |       |       |       |       |       |       |          |
|--------------------------------|----------------------------------------------------------------------------------|--------|--------|-----|----|----|----|-------|-------|-------|-------|-------|-------|-------|----------|
| cds.Camellia_sinensis.comp3142 | NADH-plastoquinone oxidoreductase chain 4L (chloroplast) [Camellia crapnelliana] | 11.258 | 2.2505 | 8.9 | 1  | 2  | 1  | 0.863 | 0.912 | 0.946 | 1.126 | 1.077 | 1.123 | 1.222 | 2.68E-03 |
| cds.Camellia_sinensis.comp3143 | glutamate-glyoxylate aminotransferase 2 [Jatropha curcas]                        | 53.544 | 251.89 | 47  | 21 | 58 | 15 | 1.039 | 1.015 | 1.007 | 0.962 | 1.001 | 0.954 | 0.953 | 5.13E-02 |
| cds.Camellia_sinensis.comp3143 | glutamate-glyoxylate aminotransferase 2-like [Juglans regia]                     | 18.454 | 39.85  | 53  | 6  | 16 | 4  | 1.097 | 1.002 | 1.001 | 0.977 | 0.984 | 0.96  | 0.942 | 1.34E-01 |
| cds.Camellia_sinensis.comp3143 | transmembrane protein [Arabidopsis thaliana]                                     | 73.9   | 6.3432 | 5   | 3  | 3  | 3  | 1.055 | 1.041 | 0.982 | 0.971 | 0.931 | 1.016 | 0.948 | 1.85E-01 |

|                                                 |                                                                                                                   |        |        |      |    |    |    |       |       |       |       |       |       |       |          |
|-------------------------------------------------|-------------------------------------------------------------------------------------------------------------------|--------|--------|------|----|----|----|-------|-------|-------|-------|-------|-------|-------|----------|
| cds.Camellia_sinensis.comp31436_c0_seq1_m.14855 | PREDICT<br>ED:<br>germinal center kinase 1 isoform X3 [Vitis vinifera]                                            | 72.963 | 1.2564 | 1.8  | 1  | 1  | 1  |       |       |       |       |       |       |       |          |
| cds.Camellia_sinensis.comp31439_c0_seq1_m.17754 | PREDICT<br>ED:<br>uncharacterized aarF domain-containing protein kinase At5g05200, chloroplastic [Vitis vinifera] | 59.251 | 71.329 | 25.7 | 12 | 19 | 12 | 1.008 | 1.021 | 1.012 | 0.998 | 0.983 | 1.004 | 0.982 | 6.43E-02 |
| cds.Camellia_sinensis.comp31443_c0_seq1_m.4815  | PREDICT<br>ED:<br>phototropin-2 [Vitis vinifera]                                                                  | 31.198 | 7.1811 | 13.1 | 3  | 3  | 2  |       |       |       |       |       |       |       |          |
| cds.Camellia_sinensis.comp31443_c0_seq2_m.5583  | PREDICT<br>ED:<br>phototropin-2 [Vitis vinifera]                                                                  | 31.112 | 7.2338 | 8.2  | 2  | 2  | 1  |       |       |       |       |       |       |       |          |
| cds.Camellia_sinensis.comp31443_c0_seq2_m.5584  | PREDICT<br>ED:<br>phototropin-2-like [Malus domestica]                                                            | 22.588 | 31.686 | 28.9 | 5  | 5  | 4  | 1.233 | 1.126 | 1.186 | 0.789 | 0.788 | 0.877 | 0.692 | 1.12E-03 |

|                                                 |                                                                                 |        |        |      |   |   |   |       |       |       |       |       |       |       |          |
|-------------------------------------------------|---------------------------------------------------------------------------------|--------|--------|------|---|---|---|-------|-------|-------|-------|-------|-------|-------|----------|
| cds.Camellia_sinensis.comp31443_c0_seq2_m.5585  | PREDICTED:<br>phototropin-2<br>[Nelumbonucifera]                                | 11.501 | 1.6787 | 14.6 | 1 | 1 | 1 |       |       |       |       |       |       |       |          |
| cds.Camellia_sinensis.comp31446_c1_seq1_m.31776 | PREDICTED:<br>COP9 signalosome complex subunit 7-like isoform X2<br>[Nicotiana] | 28.105 | 2.1067 | 7.7  | 2 | 2 | 2 |       |       |       |       |       |       |       |          |
| cds.Camellia_sinensis.comp31451_c0_seq1_m.18500 | PREDICTED:<br>cytochrome P450 86B1-like<br>[Sesamum indicum]                    | 57.848 | 5.5293 | 6.8  | 3 | 3 | 3 | 1.404 | 1.26  | 1.295 | 0.609 | 0.584 | 0.735 | 0.487 | 7.42E-04 |
| cds.Camellia_sinensis.comp31454_c0_seq1_m.4100  | PREDICTED:<br>vam6/Vps39-like protein<br>[Vitis vinifera]                       | 112.57 | 4.5719 | 2.1  | 2 | 2 | 2 | 1.039 | 1.009 | 0.96  | 0.918 | 1.023 | 1.05  | 0.994 | 8.92E-01 |
| cds.Camellia_sinensis.comp31457_c0_seq1_m.2138  | PREDICTED:<br>AAA domain-containing protein 1<br>[Morus notabilis]              | 137.34 | 12.061 | 2.6  | 2 | 2 | 1 | 1.045 | 1.157 | 1.127 | 0.934 | 0.79  | 0.926 | 0.796 | 2.11E-02 |



|                                                  |                                                                                                               |        |        |      |    |    |    |       |       |       |       |       |       |       |          |
|--------------------------------------------------|---------------------------------------------------------------------------------------------------------------|--------|--------|------|----|----|----|-------|-------|-------|-------|-------|-------|-------|----------|
| cds.Camellia_sinensis.comp3147_4_c0_seq3_m.1857  | PREDICT<br>ED:<br>stromal processing peptidase, chloroplastic [Vitis vinifera]                                | 143.42 | 164.03 | 19   | 21 | 30 | 21 | 0.993 | 1.008 | 1.033 | 0.98  | 0.98  | 0.987 | 0.971 | 6.93E-02 |
| cds.Camellia_sinensis.comp3147_5_c0_seq1_m.12049 | PREDICT<br>ED:<br>glucan endo-1,3-beta-glucosidase 6 [Juglans]                                                | 40.907 | 3.3748 | 9    | 3  | 3  | 2  |       |       |       |       |       |       |       |          |
| cds.Camellia_sinensis.comp3147_6_c0_seq1_m.29022 | PREDICT<br>ED: COP9 signalosome complex subunit 8 [Vitis]                                                     | 21.739 | 14.877 | 10.6 | 2  | 2  | 2  | 0.948 | 0.976 | 1.114 | 0.943 | 1.053 | 0.979 | 0.979 | 7.59E-01 |
| cds.Camellia_sinensis.comp3148_1_c1_seq1_m.17674 | PREDICT<br>ED:<br>glucose-6-phosphate/phosphate translocator 1, chloroplastic isoform X2 [Populus euphratica] | 43.511 | 7.5853 | 4.8  | 2  | 2  | 2  | 1.056 | 1.015 | 1.02  | 0.946 | 0.982 | 0.976 | 0.94  | 2.14E-02 |

|                                |                   |                                                                                                            |        |        |      |    |    |    |       |       |       |       |       |       |       |          |
|--------------------------------|-------------------|------------------------------------------------------------------------------------------------------------|--------|--------|------|----|----|----|-------|-------|-------|-------|-------|-------|-------|----------|
| cds.Camellia_sinensis.comp3148 | 3_c0_seq1_m.35630 | PREDICT<br>ED: 17.8<br>kDa class<br>II heat shock protein<br>[Theobroma cacao]                             | 30.257 | 43.625 | 19.8 | 4  | 9  | 4  | 1.002 | 0.953 | 1.007 | 1.053 | 1.028 | 0.954 | 1.025 | 5.29E-01 |
| cds.Camellia_sinensis.comp3148 | 9_c0_seq1_m.25731 | PREDICT<br>ED:<br>probable indole-3-pyruvate monooxygenase<br>YUCCA10 isoform X1<br>[Nelumbo nucifera]     | 42.664 | 29.008 | 31.4 | 10 | 15 | 10 | 0.989 | 1.075 | 1.016 | 0.965 | 0.962 | 0.928 | 0.927 | 5.22E-02 |
| cds.Camellia_sinensis.comp3149 | 1_c0_seq1_m.14592 | PREDICT<br>ED:<br>vacuolar protein-sorting-associated protein 33 homolog isoform X2<br>[Solanum tuberosum] | 67.853 | 7.7812 | 4.2  | 3  | 3  | 3  | 0.949 | 0.927 | 0.974 | 1.001 | 1.038 | 1.016 | 1.072 | 1.73E-02 |

|                                                  |                                                                         |        |        |      |    |    |    |       |       |       |       |       |       |       |          |
|--------------------------------------------------|-------------------------------------------------------------------------|--------|--------|------|----|----|----|-------|-------|-------|-------|-------|-------|-------|----------|
|                                                  | PREDICT                                                                 |        |        |      |    |    |    |       |       |       |       |       |       |       |          |
|                                                  | ED:                                                                     |        |        |      |    |    |    |       |       |       |       |       |       |       |          |
| cds.Camellia_sinensis.comp3149_4_c0_seq1_m.11585 | phosphatidylserine decarboxylase proenzyme 3-like [Malus domestica]     | 73.368 | 38.291 | 22   | 14 | 19 | 11 | 1.014 | 1.032 | 1.039 | 0.968 | 0.978 | 0.981 | 0.949 | 3.20E-03 |
|                                                  | PREDICT                                                                 |        |        |      |    |    |    |       |       |       |       |       |       |       |          |
|                                                  | ED:                                                                     |        |        |      |    |    |    |       |       |       |       |       |       |       |          |
| cds.Camellia_sinensis.comp3149_4_c0_seq2_m.28102 | phosphatidylserine decarboxylase proenzyme 2 [Vitis vinifera]           | 42.343 | 4.6582 | 16.1 | 7  | 8  | 4  | 1.131 | 1.097 | 1.212 | 0.871 | 0.84  | 0.815 | 0.734 | 9.38E-04 |
|                                                  | SOUL                                                                    |        |        |      |    |    |    |       |       |       |       |       |       |       |          |
| cds.Camellia_sinensis.comp3150_3_c0_seq1_m.23563 | heme-binding family protein [Medicago truncatula]                       | 44.862 | 6.5765 | 8.4  | 4  | 6  | 4  | 1.042 | 1.039 | 0.987 | 0.944 | 0.98  | 0.985 | 0.948 | 7.45E-02 |
|                                                  | PREDICT                                                                 |        |        |      |    |    |    |       |       |       |       |       |       |       |          |
|                                                  | ED:                                                                     |        |        |      |    |    |    |       |       |       |       |       |       |       |          |
| cds.Camellia_sinensis.comp3150_4_c0_seq1_m.40828 | glutathione S-transferase zeta class-like [Fragaria vesca subsp. vesca] | 26.492 | 9.6859 | 27.5 | 5  | 7  | 5  | 0.973 | 0.965 | 0.967 | 1.062 | 1.034 | 1.045 | 1.081 | 6.63E-04 |



|                                                 |                                                                            |        |        |      |    |    |    |       |       |       |       |       |       |       |          |
|-------------------------------------------------|----------------------------------------------------------------------------|--------|--------|------|----|----|----|-------|-------|-------|-------|-------|-------|-------|----------|
| cds.Camellia_sinensis.comp31513_c0_seq2_m.27050 | PREDICTED: beta-ureidopropionase [Ipomoea nil]                             | 48.626 | 11.128 | 9.9  | 3  | 4  | 3  | 1.018 | 1.153 | 0.937 | 1.132 | 0.891 | 0.875 | 0.932 | 5.14E-01 |
| cds.Camellia_sinensis.comp31528_c0_seq1_m.9279  | PREDICTED: probable methionine--tRNA ligase [Daucus carota subsp. sativus] | 90.978 | 147.32 | 36.3 | 25 | 35 | 23 | 1.045 | 1.031 | 1.051 | 0.942 | 0.982 | 0.95  | 0.919 | 3.70E-03 |
| cds.Camellia_sinensis.comp31534_c0_seq1_m.24580 | PREDICTED: UDP-glycosyltransferase 73C2 [Vitis vinifera]                   | 55.675 | 39.703 | 16.2 | 7  | 12 | 7  | 0.979 | 0.955 | 0.958 | 1.056 | 1.107 | 0.975 | 1.085 | 1.01E-01 |
| cds.Camellia_sinensis.comp31534_c0_seq2_m.50624 | PREDICTED: UDP-glycosyltransferase 73C2 [Vitis vinifera]                   | 21.076 | 13.456 | 10.9 | 1  | 1  | 1  | 0.813 | 0.988 | 1.096 | 1.098 | 0.989 | 1.058 | 1.086 | 3.93E-01 |
| cds.Camellia_sinensis.comp31546_c0_seq2_m.19660 | GYF domain-containing family protein [Populus trichocarpa]                 | 23.868 | 9.4244 | 10.1 | 1  | 1  | 1  | 1.225 | 1.025 | 1.072 | 0.856 | 0.832 | 0.947 | 0.793 | 2.56E-02 |



|                                                 |                                                                                         |        |        |      |   |    |   |       |       |       |       |       |       |       |          |
|-------------------------------------------------|-----------------------------------------------------------------------------------------|--------|--------|------|---|----|---|-------|-------|-------|-------|-------|-------|-------|----------|
| cds.Camellia_sinensis.comp31558_c0_seq1_m.19170 | PREDICTED:<br>squalene synthase [Vitis vinifera]                                        | 47.269 | 5.8641 | 6    | 2 | 2  | 2 | 1.199 | 0.979 | 0.679 | 1.216 | 1.272 | 0.674 | 1.107 | 7.51E-01 |
| cds.Camellia_sinensis.comp31559_c0_seq3_m.32145 | PREDICTED:<br>vesicle-associated membrane protein 722-like [Vigna radiata var. radiata] | 24.815 | -2     | 10.9 | 4 | 11 | 1 | 1.011 | 1.104 | 1.103 | 0.939 | 0.901 | 0.934 | 0.862 | 9.82E-03 |
| cds.Camellia_sinensis.comp31559_c0_seq5_m.33305 | Putative vesicle-associated membrane protein 726 [Morus notabilis]                      | 24.779 | 59.748 | 29.5 | 8 | 19 | 5 | 0.972 | 0.961 | 1.008 | 1.051 | 1.015 | 1.001 | 1.043 | 1.09E-01 |
| cds.Camellia_sinensis.comp31560_c0_seq1_m.23697 | PREDICTED:<br>PGR5-like protein 1A, chloroplastic [Ziziphus jujuba]                     | 35.181 | 28.184 | 19.4 | 7 | 10 | 7 | 1.04  | 1.004 | 1.015 | 0.992 | 0.978 | 0.976 | 0.963 | 3.18E-02 |

| PREDICT                                          |                                                                       |        |        |      |    |    |   |       |       |       |       |       |       |       |          |
|--------------------------------------------------|-----------------------------------------------------------------------|--------|--------|------|----|----|---|-------|-------|-------|-------|-------|-------|-------|----------|
| ED:                                              |                                                                       |        |        |      |    |    |   |       |       |       |       |       |       |       |          |
| cds.Camellia_sinensis.comp3157_2_c0_seq2_m.39642 | protein LURP-one-related 12-like [Nicotiana tabacum]                  | 23.361 | 3.1983 | 9    | 2  | 2  | 2 | 0.993 | 0.962 | 1.039 | 1.004 | 1.009 | 1.006 | 1.008 | 7.32E-01 |
| cds.Camellia_sinensis.comp3157_7_c0_seq1_m.18209 | iron-sulfur cluster biosynthesis family protein [Medicago truncatula] | 59.811 | 108.51 | 16.2 | 8  | 13 | 8 | 0.98  | 0.981 | 1.035 | 0.99  | 1.02  | 0.991 | 1.002 | 9.31E-01 |
| cds.Camellia_sinensis.comp3157_8_c0_seq2_m.37745 | SNF7 family protein [Populus trichocarpa]                             | 27.134 | 10.817 | 15.2 | 4  | 4  | 4 | 1.216 | 1.204 | 1.226 | 0.72  | 0.775 | 0.776 | 0.623 | 4.39E-05 |
| cds.Camellia_sinensis.comp3158_0_c0_seq1_m.19204 | BSD domain-containing family protein [Populus trichocarpa]            | 53.407 | 2.1591 | 2.1  | 1  | 1  | 1 | 1.177 | 1.197 | 1.132 | 0.935 | 0.786 | 0.732 | 0.7   | 8.28E-03 |
| cds.Camellia_sinensis.comp3158_1_c0_seq1_m.13417 | Dynamamin-related protein 1E [Morus notabilis]                        | 68.627 | 15.202 | 27.3 | 15 | 19 | 4 | 1.056 | 1.049 | 1.081 | 0.876 | 0.931 | 0.933 | 0.86  | 2.60E-03 |
| cds.Camellia_sinensis.comp3158_1_c0_seq2_m.13831 | Dynamamin-related protein 1E [Morus notabilis]                        | 69.077 | 83.96  | 30.4 | 16 | 21 | 4 | 0.916 | 0.945 | 0.933 | 1.093 | 1.074 | 1.104 | 1.171 | 2.00E-04 |





|                                                  |                                                                                           |        |        |      |   |    |   |       |       |       |       |       |       |       |          |
|--------------------------------------------------|-------------------------------------------------------------------------------------------|--------|--------|------|---|----|---|-------|-------|-------|-------|-------|-------|-------|----------|
| cds.Camellia_sinensis.comp3162.8_c0_seq1_m.23367 | PREDICT<br>ED:<br>ubiquitin-activating enzyme E1 1-like<br>[Ziziphus jujuba]              | 47.768 | 13.454 | 14.7 | 8 | 15 | 3 | 0.979 | 0.953 | 0.989 | 1.028 | 1.022 | 0.977 | 1.036 | 1.43E-01 |
| cds.Camellia_sinensis.comp3162.8_c1_seq1_m.44607 | PREDICT<br>ED:<br>ubiquitin-activating enzyme E1 1-like<br>[Ziziphus jujuba]              | 28.047 | 4.959  | 8.7  | 2 | 2  | 2 |       |       |       |       |       |       |       |          |
| cds.Camellia_sinensis.comp3162.9_c2_seq1_m.24972 | PREDICT<br>ED: ABC transporter G family member 11 [Vitis vinifera]                        | 47.276 | 9.734  | 2.4  | 1 | 1  | 1 | 1.233 | 1.228 | 1.006 | 0.775 | 0.805 | 0.893 | 0.713 | 1.34E-02 |
| cds.Camellia_sinensis.comp3163.3_c0_seq1_m.23576 | PREDICT<br>ED:<br>crocetin glucosyltransferase, chloroplast ic-like<br>[Nicotiana glauca] | 51.15  | 35.256 | 10   | 4 | 5  | 2 | 0.953 | 0.953 | 0.981 | 1.011 | 1.053 | 1.071 | 1.086 | 1.39E-02 |

|                                                  |                                                                                                      |        |        |      |   |   |   |       |       |       |       |       |       |       |          |
|--------------------------------------------------|------------------------------------------------------------------------------------------------------|--------|--------|------|---|---|---|-------|-------|-------|-------|-------|-------|-------|----------|
| cds.Camellia_sinensis.comp3163_3_c0_seq2_m.35544 | PREDICTED:<br>crocetin glucosyltransferase, chloroplast ic-like, partial<br>[Sesamum indicum]        | 35.64  | 15.347 | 10.8 | 3 | 3 | 1 |       |       |       |       |       |       |       |          |
| cds.Camellia_sinensis.comp3163_4_c0_seq3_m.15811 | PREDICTED:<br>protein MON2 homolog isoform X2<br>[Juglans regia]                                     | 24.093 | 1.4044 | 4.7  | 1 | 1 | 1 |       |       |       |       |       |       |       |          |
| cds.Camellia_sinensis.comp3163_6_c0_seq2_m.39904 | PREDICTED: ADP-ribosylation factor 1<br>[Prunus mume]                                                | 20.231 | 15.529 | 14.8 | 2 | 4 | 2 | 1.059 | 1.031 | 1.004 | 1.073 | 0.97  | 0.999 | 0.983 | 6.29E-01 |
| cds.Camellia_sinensis.comp3163_8_c0_seq1_m.17824 | PREDICTED:<br>protein TRIGALACTOSYL DIACYLG LYCEROL 3, chloroplastic isoform X1<br>[Sesamum indicum] | 37.986 | 2.9666 | 5.1  | 2 | 3 | 2 | 1.023 | 1.055 | 1.013 | 0.916 | 0.989 | 1.001 | 0.94  | 1.09E-01 |



|                                |                   |                                                                                                            |        |        |      |    |    |   |       |       |       |       |       |       |       |          |
|--------------------------------|-------------------|------------------------------------------------------------------------------------------------------------|--------|--------|------|----|----|---|-------|-------|-------|-------|-------|-------|-------|----------|
| cds.Camellia_sinensis.comp3163 | 9_c0_seq2_m.22265 | PREDICT ED: tubulin alpha-3 chain [Gossypium raimondii]                                                    | 49.711 | 18.069 | 24.7 | 10 | 19 | 0 |       |       |       |       |       |       |       |          |
| cds.Camellia_sinensis.comp3164 | 2_c0_seq2_m.42606 | PREDICT ED: probable mediator of RNA polymerase II transcription subunit 37c, partial [Eucalyptus grandis] | 22.778 | 7.1212 | 15.1 | 3  | 5  | 1 | 0.995 | 1.033 | 1.054 | 0.869 | 1.08  | 0.97  | 0.947 | 4.23E-01 |
| cds.Camellia_sinensis.comp3164 | 6_c0_seq1_m.28973 | alpha/beta-Hydrolases superfamily protein [Arabidopsis thaliana]                                           | 36.259 | 2.725  | 4.8  | 2  | 2  | 2 | 1.048 | 1.074 | 1.042 | 0.816 | 0.997 | 1.008 | 0.892 | 2.27E-01 |
| cds.Camellia_sinensis.comp3165 | 2_c0_seq1_m.6916  | PREDICT ED: protein EXORDIUM-like 2 [Theobroma cacao]                                                      | 36.343 | 21.274 | 14   | 4  | 6  | 4 | 1.017 | 1.015 | 1.047 | 0.973 | 0.951 | 0.964 | 0.938 | 6.02E-03 |

|                                                  |                                                                                                                                 |        |        |      |    |    |    |       |       |       |       |       |       |       |          |
|--------------------------------------------------|---------------------------------------------------------------------------------------------------------------------------------|--------|--------|------|----|----|----|-------|-------|-------|-------|-------|-------|-------|----------|
| cds.Camellia_sinensis.comp3165_2_c0_seq1_m.6917  | PREDICTED: fumarate hydratase 1, mitochondrial isoform X2 [Gossypium Fumarate hydratase 1 family protein [Populus trichocarpa]] | 29.957 | 99.173 | 43.3 | 10 | 20 | 10 | 1.016 | 1.063 | 1.049 | 0.916 | 0.958 | 0.973 | 0.91  | 1.39E-02 |
| cds.Camellia_sinensis.comp3165_2_c0_seq1_m.6918  | PREDICTED: CLP protease regulatory subunit CLPX1, mitochondrial-like [Solanum pennellii]                                        | 18.7   | 11.413 | 16.5 | 3  | 3  | 3  | 1.045 | 1.051 | 1.043 | 0.934 | 0.95  | 0.953 | 0.904 | 1.05E-04 |
| cds.Camellia_sinensis.comp3165_3_c0_seq1_m.14478 | PREDICTED: fatty-acid-binding protein 3, chloroplastic [Vitis vinifera]                                                         | 68.927 | 4.6876 | 4.7  | 3  | 4  | 1  |       |       |       |       |       |       |       |          |
| cds.Camellia_sinensis.comp3165_4_c0_seq2_m.30801 |                                                                                                                                 | 30.251 | 18.353 | 9.8  | 2  | 4  | 2  | 0.996 | 1.063 | 1.06  | 0.958 | 0.945 | 0.969 | 0.921 | 2.16E-02 |

|                                                  |                                                              |        |        |      |   |    |   |       |       |       |       |       |       |       |          |
|--------------------------------------------------|--------------------------------------------------------------|--------|--------|------|---|----|---|-------|-------|-------|-------|-------|-------|-------|----------|
|                                                  | PREDICT                                                      |        |        |      |   |    |   |       |       |       |       |       |       |       |          |
|                                                  | ED:                                                          |        |        |      |   |    |   |       |       |       |       |       |       |       |          |
| cds.Camellia_sinensis.comp3166_2_c0_seq1_m.30500 | putative glucose-6-phosphate 1-epimerase [Nelumbo nucifera]  | 35.501 | 10.983 | 29.6 | 7 | 13 | 2 | 1.013 | 0.912 | 1.038 | 0.918 | 1.066 | 1.06  | 1.027 | 6.99E-01 |
|                                                  | PREDICT                                                      |        |        |      |   |    |   |       |       |       |       |       |       |       |          |
|                                                  | ED: OTU                                                      |        |        |      |   |    |   |       |       |       |       |       |       |       |          |
| cds.Camellia_sinensis.comp3167_6_c0_seq1_m.23298 | domain-containing protein 6B [Cucumis melo]                  | 27.75  | 1.7361 | 4.8  | 1 | 1  | 1 |       |       |       |       |       |       |       |          |
|                                                  | PREDICT                                                      |        |        |      |   |    |   |       |       |       |       |       |       |       |          |
|                                                  | ED:                                                          |        |        |      |   |    |   |       |       |       |       |       |       |       |          |
| cds.Camellia_sinensis.comp3167_8_c1_seq1_m.16965 | zinc ion-binding protein, putative [Medicago truncatula]     | 40.757 | 5.25   | 8.9  | 4 | 4  | 4 | 0.936 | 0.951 | 0.945 | 1.04  | 1.091 | 1.055 | 1.125 | 1.40E-03 |
|                                                  | PREDICT                                                      |        |        |      |   |    |   |       |       |       |       |       |       |       |          |
|                                                  | ED:                                                          |        |        |      |   |    |   |       |       |       |       |       |       |       |          |
| cds.Camellia_sinensis.comp3168_7_c0_seq2_m.32126 | proteasome subunit beta type-7-A [Sesamum indicum]           | 29.52  | 11.415 | 9.2  | 3 | 10 | 3 | 1.02  | 1.003 | 1.023 | 1.01  | 0.983 | 0.976 | 0.975 | 1.01E-01 |
|                                                  | PREDICT                                                      |        |        |      |   |    |   |       |       |       |       |       |       |       |          |
|                                                  | ED: plant                                                    |        |        |      |   |    |   |       |       |       |       |       |       |       |          |
| cds.Camellia_sinensis.comp3169_0_c0_seq1_m.13753 | UBX domain-containing protein 11 isoform X1 [Vitis vinifera] | 62.219 | 4.5695 | 6.2  | 4 | 4  | 4 | 0.986 | 0.992 | 1.043 | 0.955 | 0.949 | 1.028 | 0.971 | 3.88E-01 |

|                                                  |                                                                                        |        |        |      |   |   |   |       |       |       |       |       |       |       |          |
|--------------------------------------------------|----------------------------------------------------------------------------------------|--------|--------|------|---|---|---|-------|-------|-------|-------|-------|-------|-------|----------|
|                                                  | PREDICT<br>ED:                                                                         |        |        |      |   |   |   |       |       |       |       |       |       |       |          |
| cds.Camellia_sinensis.comp3169_3_c0_seq1_m.36890 | vesicle-associated membrane protein 714<br>[Prunus mume]                               | 26.479 | 2.1048 | 3.9  | 1 | 1 | 1 | 0.992 | 0.992 | 0.959 | 1.058 | 1.034 | 0.983 | 1.045 | 1.50E-01 |
|                                                  | PREDICT<br>ED: 3-oxo-Delta(4,5)-steroid 5-beta-reductase-like<br>[Nicotiana attenuata] |        |        |      |   |   |   |       |       |       |       |       |       |       |          |
| cds.Camellia_sinensis.comp3169_4_c0_seq1_m.25248 | steroid 5-beta-reductase-like<br>[Nicotiana attenuata]                                 | 30.526 | 9.7601 | 21.9 | 6 | 9 | 6 | 0.933 | 1.028 | 1.023 | 0.994 | 1.011 | 0.984 | 1.002 | 9.40E-01 |
|                                                  | PREDICT<br>ED:                                                                         |        |        |      |   |   |   |       |       |       |       |       |       |       |          |
| cds.Camellia_sinensis.comp3169_4_c0_seq6_m.38692 | universal stress protein A-like protein<br>[Ziziphus jujuba]                           | 18.521 | 7.9883 | 16   | 4 | 6 | 4 | 1.011 | 1.011 | 0.968 | 0.979 | 0.995 | 1.027 | 1.004 | 8.64E-01 |
|                                                  | aleurone layer morphogenesis protein<br>[Medicago truncatula]                          |        |        |      |   |   |   |       |       |       |       |       |       |       |          |
| cds.Camellia_sinensis.comp3169_6_c0_seq1_m.8121  | protein<br>[Medicago truncatula]                                                       | 85.151 | 5.347  | 4.5  | 4 | 4 | 4 | 1.041 | 1.02  | 0.991 | 0.958 | 0.969 | 1.02  | 0.966 | 2.17E-01 |

|                                |                   |                                                                                                             |        |        |      |    |    |    |       |       |       |       |       |       |       |          |
|--------------------------------|-------------------|-------------------------------------------------------------------------------------------------------------|--------|--------|------|----|----|----|-------|-------|-------|-------|-------|-------|-------|----------|
| cds.Camellia_sinensis.comp3169 | 7_c0_seq1_m.20650 | PREDICTED:<br>NADH dehydrogenase [ubiquinone] 1 alpha subcomplex subunit 9, mitochondrial [Ziziphus jujuba] | 38.682 | 67.922 | 32.1 | 10 | 14 | 10 | 1.011 | 1.023 | 0.975 | 1.006 | 0.982 | 1.017 | 0.999 | 9.48E-01 |
| cds.Camellia_sinensis.comp3171 | 4_c0_seq2_m.17445 | PREDICTED:<br>renalase isoform X1 [Citrus sinensis]                                                         | 27.415 | 7.0843 | 12   | 2  | 2  | 2  |       |       |       |       |       |       |       |          |
| cds.Camellia_sinensis.comp3171 | 5_c0_seq1_m.21131 | PREDICTED:<br>2-methylbutanal oxime monooxygenase [Theobroma cacao]                                         | 58.791 | 22.417 | 12.4 | 7  | 9  | 7  | 0.901 | 0.932 | 0.946 | 1.118 | 1.094 | 1.082 | 1.185 | 6.02E-04 |
| cds.Camellia_sinensis.comp3172 | 1_c0_seq1_m.24824 | PREDICTED:<br>mitogen-activated protein kinase homolog MMK1 [Vigna angularis]                               | 45.454 | 11.166 | 15.8 | 6  | 7  | 5  | 0.977 | 0.971 | 1.026 | 1.006 | 1.024 | 1.056 | 1.038 | 1.74E-01 |

|                                                  |                                                                                          |        |        |      |    |    |    |       |       |       |       |       |       |       |          |
|--------------------------------------------------|------------------------------------------------------------------------------------------|--------|--------|------|----|----|----|-------|-------|-------|-------|-------|-------|-------|----------|
| cds.Camellia_sinensis.comp3172_1_c0_seq2_m.41791 | PREDICT<br>ED:<br>mitogen-activated protein kinase homolog MMK2 isoform X2 [Glycine max] | 20.964 | 1.6928 | 9.8  | 2  | 3  | 1  | 0.989 | 1.038 | 0.905 | 1.015 | 1.021 | 1.044 | 1.05  | 2.84E-01 |
| cds.Camellia_sinensis.comp3172_1_c0_seq3_m.44147 | PREDICT<br>ED:<br>mitogen-activated protein kinase homolog MMK2 [Pyrus x bretschneideri] | 29.242 | 11.143 | 14.3 | 4  | 6  | 3  | 0.976 | 1.093 | 1.055 | 0.986 | 0.979 | 0.917 | 0.923 | 1.20E-01 |
| cds.Camellia_sinensis.comp3172_1_c1_seq1_m.40504 | PREDICT<br>ED:<br>mitogen-activated protein kinase homolog MMK2 [Vitis vinifera]         | 22.169 | 86.288 | 28.1 | 4  | 6  | 3  | 1.037 | 0.962 | 0.93  | 1.104 | 0.964 | 1.007 | 1.05  | 4.02E-01 |
| cds.Camellia_sinensis.comp3172_3_c0_seq1_m.25436 | PREDICT<br>ED:<br>trithorax group protein osa [Ziziphus jujuba]                          | 54.091 | 127.87 | 33.2 | 12 | 24 | 11 | 1.007 | 1.02  | 0.958 | 0.998 | 1.003 | 0.994 | 1.003 | 8.66E-01 |

|                                |                                                                                                                                                      |        |        |      |   |   |   |       |       |       |       |       |       |       |          |
|--------------------------------|------------------------------------------------------------------------------------------------------------------------------------------------------|--------|--------|------|---|---|---|-------|-------|-------|-------|-------|-------|-------|----------|
| cds.Camellia_sinensis.comp3173 | PREDICT<br>ED:<br>xanthine dehydrogenase 1<br>[Vitis vinifera]                                                                                       | 91.284 | 3.3731 | 2.3  | 2 | 3 | 2 | 0.989 | 0.931 | 1.086 | 1.014 | 0.971 | 1.022 | 1     | 9.67E-01 |
| cds.Camellia_sinensis.comp3176 | PREDICT<br>ED:<br>NADH dehydrogenase [ubiquinone] iron-sulfur protein 6, mitochondrial<br>[Ipomoea nil]                                              | 14.225 | 2.4462 | 17.7 | 2 | 3 | 2 | 1.091 | 0.917 | 1.018 | 0.871 | 0.808 | 1.277 | 0.977 | 7.95E-01 |
| cds.Camellia_sinensis.comp3176 | PREDICT<br>ED:<br>dihydrolysoyllysine-succinyltransferase component of 2-oxoglutarate dehydrogenase complex 2, mitochondrial-like<br>[Juglans regia] | 30.695 | 2.9499 | 3.5  | 1 | 3 | 1 | 1.095 | 0.941 | 1.002 | 0.947 | 0.974 | 1.034 | 0.973 | 6.32E-01 |





|                                                  |                                                                                                       |        |        |      |    |    |    |       |       |       |       |       |       |       |          |
|--------------------------------------------------|-------------------------------------------------------------------------------------------------------|--------|--------|------|----|----|----|-------|-------|-------|-------|-------|-------|-------|----------|
|                                                  | PREDICT<br>ED: 39S                                                                                    |        |        |      |    |    |    |       |       |       |       |       |       |       |          |
| cds.Camellia_sinensis.comp3178_1_c0_seq1_m.40000 | ribosomal protein L47, mitochondrial<br>[Cucumis sativus]                                             | 16.537 | 7.9898 | 28.7 | 3  | 3  | 3  | 0.927 | 1.03  | 0.905 | 1.07  | 0.989 | 1.103 | 1.105 | 1.23E-01 |
|                                                  | PREDICT<br>ED: YTH                                                                                    |        |        |      |    |    |    |       |       |       |       |       |       |       |          |
| cds.Camellia_sinensis.comp3178_7_c0_seq1_m.11219 | domain-containing family protein 1-like<br>[Sesamum indicum]                                          | 79.591 | 31.73  | 13.4 | 11 | 15 | 11 | 0.928 | 0.975 | 1     | 1.028 | 1.071 | 1.04  | 1.081 | 3.53E-02 |
|                                                  | PREDICT<br>ED:<br>probable receptor-like protein kinase<br>At5g47070 isoform X2<br>[Nelumbo nucifera] |        |        |      |    |    |    |       |       |       |       |       |       |       |          |
| cds.Camellia_sinensis.comp3178_8_c0_seq1_m.5572  | probable receptor-like protein kinase<br>At5g47070 isoform X2<br>[Nelumbo nucifera]                   | 46.778 | 22.622 | 8.6  | 4  | 5  | 3  | 1.011 | 1.069 | 1.01  | 0.982 | 0.962 | 0.975 | 0.945 | 4.53E-02 |
|                                                  | PREDICT<br>ED:                                                                                        |        |        |      |    |    |    |       |       |       |       |       |       |       |          |
| cds.Camellia_sinensis.comp3178_9_c0_seq1_m.20372 | cytochrome P450 76C2-like<br>[Vitis vinifera]                                                         | 63.468 | 14.003 | 13.3 | 7  | 9  | 6  | 0.999 | 1.05  | 1.025 | 0.975 | 0.969 | 0.986 | 0.953 | 3.50E-02 |



|                                                  |                                                                   |        |        |      |   |    |   |       |       |       |       |       |       |       |          |
|--------------------------------------------------|-------------------------------------------------------------------|--------|--------|------|---|----|---|-------|-------|-------|-------|-------|-------|-------|----------|
|                                                  | PREDICT                                                           |        |        |      |   |    |   |       |       |       |       |       |       |       |          |
|                                                  | ED:                                                               |        |        |      |   |    |   |       |       |       |       |       |       |       |          |
| cds.Camellia_sinensis.comp3181_0_c0_seq2_m.6850  | probable linoleate 9S-lipoxygenase 5 [Eucalyptus grandis]         | 21.445 | 48.311 | 30.2 | 6 | 11 | 6 | 0.992 | 1.009 | 0.953 | 1.049 | 1.03  | 1.003 | 1.043 | 1.17E-01 |
|                                                  | PREDICT                                                           |        |        |      |   |    |   |       |       |       |       |       |       |       |          |
|                                                  | ED: acyl-CoA-binding domain-containing protein 1 [Vitis vinifera] |        |        |      |   |    |   |       |       |       |       |       |       |       |          |
| cds.Camellia_sinensis.comp3181_6_c1_seq3_m.30019 | 40.747                                                            | 3.3527 | 3.2    | 1    | 1 | 1  |   |       |       |       |       |       |       |       |          |
|                                                  | PREDICT                                                           |        |        |      |   |    |   |       |       |       |       |       |       |       |          |
|                                                  | ED:                                                               |        |        |      |   |    |   |       |       |       |       |       |       |       |          |
| cds.Camellia_sinensis.comp3181_7_c0_seq1_m.7018  | polyadenylate-binding protein 8-like isoform X2 [Nicotiana]       | 44.482 | 2.2016 | 18.1 | 8 | 13 | 1 | 1     | 1.024 | 0.914 | 1.019 | 1.022 | 1.034 | 1.047 | 3.12E-01 |
|                                                  | PREDICT                                                           |        |        |      |   |    |   |       |       |       |       |       |       |       |          |
|                                                  | ED:                                                               |        |        |      |   |    |   |       |       |       |       |       |       |       |          |
| cds.Camellia_sinensis.comp3181_7_c0_seq2_m.7904  | polyadenylate-binding protein 8-like isoform X2 [Nicotiana]       | 44.471 | 57.432 | 23.6 | 9 | 15 | 2 | 0.926 | 0.951 | 0.998 | 1.05  | 0.977 | 0.973 | 1.043 | 2.69E-01 |

|                                                  |                                                                                        |        |        |      |    |    |    |       |       |       |       |       |       |       |          |
|--------------------------------------------------|----------------------------------------------------------------------------------------|--------|--------|------|----|----|----|-------|-------|-------|-------|-------|-------|-------|----------|
| cds.Camellia_sinensis.comp31817_c0_seq2_m.7905   | polyadenylate-binding family protein [Populus trichocarpa PREDICT ED:                  | 29.29  | 66.505 | 41.5 | 10 | 12 | 10 | 0.976 | 0.982 | 1     | 1.03  | 0.991 | 1.019 | 1.028 | 1.16E-01 |
| cds.Camellia_sinensis.comp31819_c0_seq1_m.19399  | sphingosine-1-phosphate lyase [Jatropha curcas] PREDICT ED:                            | 62.296 | 7.6452 | 8.9  | 5  | 5  | 5  | 0.961 | 1.051 | 1.025 | 1.055 | 0.95  | 1.056 | 1.008 | 8.76E-01 |
| cds.Camellia_sinensis.comp31821_c0_seq13_m.22182 | protein indeterminate-domain 5, chloroplastic isoform X1 [Theobroma cacao] PREDICT ED: | 20.883 | 1.7351 | 4.3  | 1  | 1  | 1  |       |       |       |       |       |       |       |          |
| cds.Camellia_sinensis.comp31826_c0_seq1_m.17816  | nicotinate phosphoribosyltransferase 2 [Daucus carota subsp. sativus]                  | 62.797 | 7.4605 | 6.4  | 3  | 4  | 3  | 1.008 | 1.019 | 1.024 | 0.964 | 1.002 | 0.982 | 0.966 | 4.65E-02 |

|                                                  |                                                                                    |        |        |      |   |    |   |       |       |       |       |       |       |       |          |
|--------------------------------------------------|------------------------------------------------------------------------------------|--------|--------|------|---|----|---|-------|-------|-------|-------|-------|-------|-------|----------|
| cds.Camellia_sinensis.comp3182_7_c0_seq1_m.11455 | calcium ion-binding protein [Medicago truncatula] PREDICT                          | 64.054 | 1.5508 | 1.6  | 1 | 1  | 1 | 0.992 | 0.961 | 1.005 | 1.115 | 0.969 | 0.979 | 1.035 | 5.22E-01 |
| cds.Camellia_sinensis.comp3183_0_c0_seq1_m.18863 | ED: serine carboxypeptidase-like [Eucalyptus grandis] PREDICT                      | 25.392 | 34.376 | 34.1 | 6 | 17 | 6 | 1.069 | 1.043 | 0.985 | 0.949 | 0.986 | 0.975 | 0.94  | 8.21E-02 |
| cds.Camellia_sinensis.comp3183_1_c0_seq2_m.20143 | ED: plasminogen activator inhibitor 1 RNA-binding protein [Vitis vinifera] PREDICT | 40.744 | 35.755 | 13.6 | 4 | 5  | 3 | 1.107 | 1.144 | 1.206 | 0.882 | 0.789 | 0.839 | 0.726 | 1.42E-03 |
| cds.Camellia_sinensis.comp3183_1_c0_seq3_m.20572 | ED: U3 small nucleolar RNA-associated protein 25 [Jatropha curcas]                 | 40.236 | 48.52  | 19.8 | 6 | 13 | 4 | 1.308 | 1.202 | 1.239 | 0.708 | 0.658 | 0.781 | 0.573 | 5.42E-04 |



|                                                  |                                                                                                                                                                   |        |        |      |   |   |   |       |       |       |       |       |       |       |          |
|--------------------------------------------------|-------------------------------------------------------------------------------------------------------------------------------------------------------------------|--------|--------|------|---|---|---|-------|-------|-------|-------|-------|-------|-------|----------|
| cds.Camellia_sinensis.comp3183_9_c1_seq9_m.41622 | PREDICTED:<br>mavicyanin<br>[Theobroma cacao]<br>PREDICTED:<br>probable pre-mRNA-splicing factor ATP-dependent RNA helicase DEAH9 isoform X1<br>[Theobroma cacao] | 24.512 | 15.908 | 10.1 | 2 | 3 | 2 | 1.019 | 1.029 | 1.017 | 0.986 | 1.005 | 0.97  | 0.966 | 3.34E-02 |
| cds.Camellia_sinensis.comp3185_2_c0_seq1_m.12704 | ATP-dependent RNA helicase DEAH9 isoform X1<br>[Theobroma cacao]                                                                                                  | 77.817 | 2.6793 | 1.7  | 1 | 1 | 1 | 0.879 | 1.08  | 0.907 | 1.091 | 1.075 | 1.003 | 1.106 | 2.07E-01 |
| cds.Camellia_sinensis.comp3185_5_c0_seq2_m.30542 | PREDICTED:<br>putative hydrolase C777.06c<br>[Citrus sinensis]                                                                                                    | 36.191 | 6.6618 | 4    | 1 | 1 | 1 | 1.089 | 0.959 | 1.129 | 0.927 | 0.979 | 0.906 | 0.885 | 9.25E-02 |

|                                                 |                                                                                                                             |        |        |      |   |    |   |       |       |       |       |       |       |       |          |
|-------------------------------------------------|-----------------------------------------------------------------------------------------------------------------------------|--------|--------|------|---|----|---|-------|-------|-------|-------|-------|-------|-------|----------|
|                                                 | PREDICT<br>ED:<br>putative<br>E3<br>ubiquitin-<br>protein<br>ligase<br>XBAT35<br>isoform<br>X2<br>[Nicotiana<br>sylvestris] |        |        |      |   |    |   |       |       |       |       |       |       |       |          |
| cds.Camellia_sinensis.comp31857_c0_seq5_m.17877 |                                                                                                                             | 58.081 | 6.101  | 3    | 1 | 1  | 1 | 1.047 | 1.043 | 0.986 | 0.787 | 1.044 | 1.078 | 0.946 | 5.57E-01 |
|                                                 | PREDICT<br>ED:<br>ubiquitin-<br>conjugating enzyme<br>E2 36<br>[Theobroma cacao]                                            |        |        |      |   |    |   |       |       |       |       |       |       |       |          |
| cds.Camellia_sinensis.comp31860_c0_seq1_m.5968  |                                                                                                                             | 22.288 | 59.801 | 34.8 | 7 | 21 | 7 | 0.998 | 1.024 | 0.979 | 0.998 | 1.018 | 1.008 | 1.008 | 6.14E-01 |
|                                                 | PREDICT<br>ED:<br>pentatricopeptide<br>repeat-<br>containing<br>protein<br>At1g74850,<br>chloroplastic [Vitis<br>vinifera]  |        |        |      |   |    |   |       |       |       |       |       |       |       |          |
| cds.Camellia_sinensis.comp31866_c0_seq1_m.8702  |                                                                                                                             | 91.798 | 5.3669 | 3.7  | 3 | 3  | 3 | 0.975 | 1.001 | 1.035 | 0.994 | 0.977 | 1.03  | 0.997 | 8.95E-01 |



|                                                                                               |                   |        |        |      |   |    |   |       |       |       |       |       |       |       |          |
|-----------------------------------------------------------------------------------------------|-------------------|--------|--------|------|---|----|---|-------|-------|-------|-------|-------|-------|-------|----------|
| cds.Camellia_sinensis.comp3186                                                                | 8_c0_seq1_m.13263 | 71.693 | 31.484 | 15.4 | 7 | 7  | 7 | 0.937 | 0.982 | 0.963 | 0.985 | 1.056 | 1.098 | 1.089 | 7.06E-02 |
| PREDICTED:<br>soluble starch synthase 1, chloroplastic/amyloplastic [Ricinus communis]        |                   |        |        |      |   |    |   |       |       |       |       |       |       |       |          |
| cds.Camellia_sinensis.comp3187                                                                | 0_c0_seq1_m.10965 | 44.186 | 2.7391 | 3.8  | 2 | 2  | 2 | 1.133 | 1.079 | 1.109 | 0.849 | 0.934 | 0.867 | 0.798 | 2.16E-03 |
| PREDICTED:<br>probable cadmium/zinc-transporting ATPase HMA1, chloroplastic [Sesamum indicum] |                   |        |        |      |   |    |   |       |       |       |       |       |       |       |          |
| cds.Camellia_sinensis.comp3187                                                                | 2_c0_seq1_m.4416  | 54.165 | 26.595 | 19.2 | 7 | 9  | 7 | 1     | 1.006 | 1.047 | 0.957 | 0.966 | 0.988 | 0.953 | 5.11E-02 |
| PREDICTED: 4-alpha-glucanotransferase DPE2-like [Populus euphratica]                          |                   |        |        |      |   |    |   |       |       |       |       |       |       |       |          |
| cds.Camellia_sinensis.comp3187                                                                | 2_c0_seq1_m.4417  | 45.813 | 31.861 | 23.6 | 8 | 15 | 8 | 1.068 | 1.019 | 1.001 | 0.939 | 0.975 | 0.989 | 0.94  | 6.75E-02 |
| PREDICTED: 4-alpha-glucanotransferase DPE2 [Prunus mume]                                      |                   |        |        |      |   |    |   |       |       |       |       |       |       |       |          |



|                                                  |                                                                                                 |        |        |      |    |    |    |       |       |       |       |       |       |       |          |
|--------------------------------------------------|-------------------------------------------------------------------------------------------------|--------|--------|------|----|----|----|-------|-------|-------|-------|-------|-------|-------|----------|
| cds.Camellia_sinensis.comp3188_4_c0_seq1_m.15173 | PREDICTED: mitochondrial-processing peptidase subunit alpha [Musa acuminata subsp. malaccensis] | 54.485 | 182.83 | 44   | 17 | 41 | 17 | 1.019 | 0.985 | 0.996 | 0.991 | 1.019 | 0.994 | 1.001 | 9.24E-01 |
| cds.Camellia_sinensis.comp3188_8_c0_seq4_m.43428 | Metal-dependent phosphohydrolase [Arabidopsis thaliana]                                         | 25.147 | 12.217 | 16.6 | 3  | 3  | 3  | 1.163 | 1.175 | 1.164 | 0.81  | 0.803 | 0.837 | 0.7   | 1.53E-05 |
| cds.Camellia_sinensis.comp3189_2_c0_seq1_m.18682 | PREDICTED: 3-oxoacyl-[acyl-carrier-protein] synthase, mitochondrial isoform X1 [Vitis           | 50.769 | 27.358 | 7.2  | 2  | 2  | 2  | 0.822 | 1.18  | 1.104 | 1.109 | 0.873 | 0.938 | 0.94  | 6.98E-01 |

|                                                                               |                   |        |        |      |    |    |    |       |       |       |       |       |       |       |          |
|-------------------------------------------------------------------------------|-------------------|--------|--------|------|----|----|----|-------|-------|-------|-------|-------|-------|-------|----------|
| cds.Camellia_sinensis.comp3189                                                | 6_c0_seq2_m.899   | 210.18 | 8.8411 | 2.8  | 6  | 6  | 6  | 0.925 | 1.003 | 0.967 | 1.055 | 0.962 | 0.985 | 1.037 | 3.76E-01 |
| PREDICTED:<br>nuclear pore complex protein NUP205 isoform X1 [Vitis vinifera] |                   |        |        |      |    |    |    |       |       |       |       |       |       |       |          |
| cds.Camellia_sinensis.comp3189                                                | 7_c0_seq5_m.20303 | 37.035 | 116.82 | 49.5 | 15 | 35 | 14 | 0.979 | 0.964 | 0.933 | 1.077 | 1.011 | 1.036 | 1.086 | 2.37E-02 |
| adenylate kinase 5, chloroplast ic isoform X9 [Eucalyptus grandis]            |                   |        |        |      |    |    |    |       |       |       |       |       |       |       |          |
| cds.Camellia_sinensis.comp3189                                                | 7_c0_seq5_m.20304 | 24.94  | 63.793 | 35.3 | 6  | 15 | 6  | 0.943 | 0.978 | 0.944 | 1.045 | 1.045 | 1.03  | 1.089 | 2.70E-03 |
| ED:<br>adenylate kinase 5, chloroplast ic [Prunus mume]                       |                   |        |        |      |    |    |    |       |       |       |       |       |       |       |          |
| cds.Camellia_sinensis.comp3190                                                | 0_c0_seq1_m.9317  | 81.029 | 18.749 | 7.8  | 6  | 6  | 6  | 0.964 | 0.974 | 0.964 | 1.041 | 1.062 | 0.999 | 1.069 | 2.24E-02 |
| ED:<br>UPF0261 protein ml19388 [Daucus carota subsp. sativus]                 |                   |        |        |      |    |    |    |       |       |       |       |       |       |       |          |



|                                                  |                                                                                                                                                                      |        |        |      |    |    |    |       |       |       |       |       |       |       |          |
|--------------------------------------------------|----------------------------------------------------------------------------------------------------------------------------------------------------------------------|--------|--------|------|----|----|----|-------|-------|-------|-------|-------|-------|-------|----------|
|                                                  | PREDICT<br>ED: 26S                                                                                                                                                   |        |        |      |    |    |    |       |       |       |       |       |       |       |          |
| cds.Camellia_sinensis.comp3190_9_c0_seq1_m.17647 | proteasome regulatory subunit 4 homolog A<br>[Sesamum<br>PREDICT<br>ED:<br>guanosine nucleotide diphosphate dissociation inhibitor 2 isoform X2<br>[Ziziphus jujuba] | 49.555 | 81.331 | 42.7 | 19 | 25 | 19 | 1.173 | 1.171 | 1.16  | 0.817 | 0.807 | 0.794 | 0.69  | 1.02E-06 |
| cds.Camellia_sinensis.comp3191_0_c0_seq2_m.21802 | ED:<br>clustered mitochondria protein<br>[Vitis vinifera]                                                                                                            | 49.602 | 192.48 | 39.2 | 16 | 42 | 16 | 0.99  | 0.963 | 0.968 | 0.998 | 1.038 | 1.035 | 1.051 | 3.04E-02 |
| cds.Camellia_sinensis.comp3191_1_c0_seq1_m.1537  | PREDICT<br>ED:<br>clustered mitochondria protein<br>[Vitis vinifera]                                                                                                 | 155.82 | 19.682 | 4.4  | 5  | 5  | 5  | 1.089 | 1.12  | 1.113 | 0.854 | 0.846 | 0.942 | 0.795 | 2.88E-03 |
| cds.Camellia_sinensis.comp3191_3_c0_seq1_m.21576 | PREDICT<br>ED:<br>peroxiredoxin Q, chloroplastic<br>[Ricinus communis]                                                                                               | 24.214 | 134.98 | 46.8 | 9  | 34 | 9  | 1.061 | 1.015 | 1.024 | 0.961 | 0.953 | 0.963 | 0.928 | 5.88E-03 |



|                                                  |                                                                          |        |        |      |    |    |    |       |       |       |       |       |       |       |          |
|--------------------------------------------------|--------------------------------------------------------------------------|--------|--------|------|----|----|----|-------|-------|-------|-------|-------|-------|-------|----------|
|                                                  | PREDICT<br>ED:                                                           |        |        |      |    |    |    |       |       |       |       |       |       |       |          |
| cds.Camellia_sinensis.comp3193_1_c0_seq1_m.7532  | pyrophosphate-energized vacuolar membrane proton pump-like [Ipomoea nil] | 80.572 | 120.24 | 18.5 | 13 | 34 | 7  | 1.026 | 0.969 | 0.994 | 0.979 | 1.019 | 0.993 | 1.001 | 9.70E-01 |
|                                                  | PREDICT<br>ED:                                                           |        |        |      |    |    |    |       |       |       |       |       |       |       |          |
| cds.Camellia_sinensis.comp3193_6_c0_seq1_m.9484  | calcium-transporting ATPase, endoplasmic reticulum-type [Vitis vinifera] | 85.11  | 1.8695 | 3.4  | 3  | 6  | 1  | 1.056 | 1.036 | 1.008 | 0.968 | 1.01  | 0.92  | 0.935 | 8.75E-02 |
|                                                  | PREDICT<br>ED:                                                           |        |        |      |    |    |    |       |       |       |       |       |       |       |          |
| cds.Camellia_sinensis.comp3194_6_c0_seq1_m.19079 | DEAD-box ATP-dependent RNA helicase 38 [Ipomoea nil]                     | 54.44  | 94.859 | 29.7 | 13 | 22 | 13 | 0.954 | 0.977 | 0.968 | 1.009 | 1.061 | 1.053 | 1.077 | 1.23E-02 |
|                                                  | PREDICT<br>ED:                                                           |        |        |      |    |    |    |       |       |       |       |       |       |       |          |
| cds.Camellia_sinensis.comp3195_0_c0_seq1_m.31380 | probable proteasome inhibitor [Ziziphus jujuba]                          | 31.92  | 19.493 | 14.5 | 4  | 7  | 4  | 1.01  | 0.957 | 0.935 | 1.046 | 0.995 | 1.094 | 1.08  | 9.71E-02 |



|                                                  |                                                                                                               |        |        |      |   |   |   |       |       |       |       |       |      |       |          |
|--------------------------------------------------|---------------------------------------------------------------------------------------------------------------|--------|--------|------|---|---|---|-------|-------|-------|-------|-------|------|-------|----------|
| cds.Camellia_sinensis.comp3195_2_c0_seq2_m.12569 | PREDICTED:<br>pentatricopeptide repeat-containing protein<br>At1g26460,<br>mitochondrial<br>[Nelumbonucifera] | 69.016 | 6.5756 | 2.7  | 2 | 2 | 2 | 1.055 | 0.92  | 1.033 | 0.969 | 1.006 | 1.02 | 0.996 | 9.54E-01 |
| cds.Camellia_sinensis.comp3195_5_c0_seq7_m.21954 | PREDICTED:<br>nicotinate-nucleotide pyrophosphorylase [carboxylating],<br>chloroplastic<br>[Jatropha curcas]  | 35.621 | 37.042 | 17.9 | 6 | 7 | 6 | 0.985 | 1.022 | 0.98  | 1.009 | 0.994 | 1.04 | 1.019 | 3.78E-01 |
| cds.Camellia_sinensis.comp3195_6_c0_seq1_m.37546 | PREDICTED:<br>granule-bound starch synthase 1,<br>chloroplastic/amyloplastic-like<br>[Ziziphus jujuba]        | 27.177 | 33.057 | 17.9 | 4 | 6 | 3 | 0.901 | 0.945 | 0.903 | 1.053 | 1.082 | 1.13 | 1.188 | 2.62E-03 |



|                                                  |                                                                                                |        |        |      |    |    |    |       |       |       |       |       |       |       |          |
|--------------------------------------------------|------------------------------------------------------------------------------------------------|--------|--------|------|----|----|----|-------|-------|-------|-------|-------|-------|-------|----------|
| cds.Camellia_sinensis.comp3197_3_c2_seq4_m.32928 | PREDICTED:<br>protein-lysine N-methyltransferase Mett10-like<br>[Daucus carota subsp. sativus] | 37.398 | 3.0913 | 20.8 | 6  | 6  | 1  |       |       |       |       |       |       |       |          |
| cds.Camellia_sinensis.comp3197_3_c2_seq5_m.36078 | PREDICTED:<br>protein-lysine N-methyltransferase Mett10<br>[Vitis vinifera]                    | 37.447 | 24.782 | 25.8 | 7  | 7  | 2  | 0.927 | 1.001 | 1.04  | 1.037 | 0.881 | 1.131 | 1.027 | 7.92E-01 |
| cds.Camellia_sinensis.comp3197_4_c0_seq2_m.16924 | PREDICTED: T-complex protein 1 subunit delta<br>[Cucumis melo]                                 | 57.783 | 97.147 | 30.5 | 18 | 31 | 18 | 0.918 | 0.958 | 0.941 | 1.069 | 1.049 | 1.063 | 1.129 | 8.59E-04 |
| cds.Camellia_sinensis.comp3197_6_c1_seq1_m.38493 | PREDICTED:<br>ferritin-3, chloroplast ic<br>[Theobroma cacao]                                  | 28.646 | 153.31 | 42.4 | 10 | 88 | 10 | 0.948 | 0.949 | 0.974 | 1.061 | 1.06  | 1.043 | 1.102 | 7.41E-04 |



|                                                  |                                                                                |        |        |      |   |   |   |       |       |       |       |       |       |       |          |
|--------------------------------------------------|--------------------------------------------------------------------------------|--------|--------|------|---|---|---|-------|-------|-------|-------|-------|-------|-------|----------|
| cds.Camellia_sinensis.comp3198_4_c1_seq4_m.33674 | adaptin ear-binding coat-associated protein 1 [Medicago truncatula]            | 30.531 | 24.374 | 13.4 | 3 | 3 | 3 | 1.054 | 0.976 | 1.056 | 0.934 | 0.981 | 0.956 | 0.93  | 7.23E-02 |
| cds.Camellia_sinensis.comp3198_4_c2_seq1_m.13214 | peptidyl-prolyl cis-trans isomerase CYP71 [Cajanus cajan]                      | 37.666 | 3.5294 | 9.6  | 3 | 3 | 3 | 0.934 | 1.01  | 0.976 | 1.054 | 1.005 | 1.044 | 1.063 | 8.57E-02 |
| cds.Camellia_sinensis.comp3198_4_c2_seq1_m.13215 | PREDICTED: peptidyl-prolyl cis-trans isomerase CYP71-like [Gossypium hirsutum] | 17.258 | 2.6346 | 11.8 | 2 | 2 | 2 |       |       |       |       |       |       |       |          |
| cds.Camellia_sinensis.comp3199_0_c0_seq1_m.12729 | PREDICTED: CSC1-like protein HYP1 isoform X2 [Vitis vinifera]                  | 57.491 | 7.3314 | 8.3  | 4 | 4 | 4 | 1.006 | 0.99  | 0.945 | 0.949 | 1.049 | 1.068 | 1.043 | 3.80E-01 |



|                                                  |                                                                                                                     |        |        |      |    |    |   |       |       |       |       |       |       |       |          |
|--------------------------------------------------|---------------------------------------------------------------------------------------------------------------------|--------|--------|------|----|----|---|-------|-------|-------|-------|-------|-------|-------|----------|
| cds.Camellia_sinensis.comp3201_1_c0_seq1_m.24958 | PREDICTED:<br>mitochondrial import inner membrane translocase subunit TIM17-2-like<br>[Daucus carota subsp.sativus] | 24.116 | 1.8303 | 3.8  | 1  | 1  | 1 | 0.979 | 1.004 | 0.995 | 1.009 | 0.993 | 1.031 | 1.018 | 2.38E-01 |
| cds.Camellia_sinensis.comp3201_3_c0_seq2_m.11407 | PREDICTED:<br>pyrophosphate--fructose 6-phosphate 1-phosphotransferase subunit alpha<br>[Sesamum indicum]           | 67.174 | 6.2866 | 23.2 | 11 | 15 | 2 | 1.004 | 1.058 | 0.981 | 0.907 | 0.936 | 0.948 | 0.917 | 2.93E-02 |
| cds.Camellia_sinensis.comp3201_3_c0_seq3_m.12719 | PREDICTED:<br>pyrophosphate--fructose 6-phosphate 1-phosphotransferase subunit alpha<br>[Sesamum indicum]           | 67.297 | 59.581 | 27.7 | 13 | 17 | 4 | 0.945 | 0.966 | 0.949 | 1.029 | 1.048 | 1.087 | 1.106 | 4.48E-03 |





|                                                 |                                                                                               |        |        |      |    |    |    |       |       |       |       |       |       |       |          |
|-------------------------------------------------|-----------------------------------------------------------------------------------------------|--------|--------|------|----|----|----|-------|-------|-------|-------|-------|-------|-------|----------|
| cds.Camellia_sinensis.comp32027_c0_seq1_m.3932  | PREDICT<br>ED:<br>ATPase 10, plasma membrane -type<br>[Eucalyptus grandis] transmembrane      | 104.46 | 196.46 | 38.8 | 32 | 80 | 22 | 0.998 | 0.988 | 1.01  | 1     | 1.012 | 1.004 | 1.007 | 4.10E-01 |
| cds.Camellia_sinensis.comp32027_c0_seq4_m.14972 | protein, putative<br>[Medicago truncatula]                                                    | 26.309 | 8.107  | 15.8 | 3  | 3  | 3  |       |       |       |       |       |       |       |          |
| cds.Camellia_sinensis.comp32029_c0_seq1_m.29689 | PREDICT<br>ED:<br>photosynthetic NDH subunit of complex B 2, chloroplastic<br>[Juglans regia] | 40.599 | 58.33  | 20.1 | 6  | 7  | 6  | 0.994 | 0.986 | 1.012 | 1.022 | 1.015 | 0.985 | 1.01  | 5.09E-01 |
| cds.Camellia_sinensis.comp32030_c0_seq3_m.42437 | PREDICT<br>ED:<br>thymidylate kinase isoform X2<br>[Sesamum indicum]                          | 15.97  | 2.9187 | 7.6  | 1  | 1  | 1  | 0.96  | 1.085 | 0.955 | 1     | 0.97  | 1.04  | 1.003 | 9.24E-01 |
| cds.Camellia_sinensis.comp32031_c0_seq1_m.16650 | PREDICT<br>ED: citrate synthase, glyoxysomal<br>[Sesamum indicum]                             | 56.278 | 49.115 | 21.5 | 10 | 16 | 10 | 0.965 | 0.967 | 0.984 | 1.059 | 1.029 | 1.02  | 1.066 | 7.86E-03 |

|                                                  |                                                                                                                                                                      |        |        |      |   |    |   |       |       |       |       |       |       |       |          |
|--------------------------------------------------|----------------------------------------------------------------------------------------------------------------------------------------------------------------------|--------|--------|------|---|----|---|-------|-------|-------|-------|-------|-------|-------|----------|
| cds.Camellia_sinensis.comp3203_5_c0_seq3_m.19627 | PREDICT<br>ED:<br>dolichyl-<br>diphospho-<br>oligosacch-<br>aride--<br>protein<br>glycosyltra-<br>nsferase<br>48 kDa<br>subunit<br>isoform<br>X3 [Vitis<br>vinifera] | 48.95  | 14.938 | 13.5 | 6 | 11 | 6 | 1.002 | 0.987 | 0.955 | 1.01  | 1.043 | 1.016 | 1.042 | 7.34E-02 |
| cds.Camellia_sinensis.comp3203_5_c0_seq4_m.21981 | PREDICT<br>ED:<br>scopoletin<br>glucosyltra-<br>nsferase<br>[Theobrom-<br>a cacao]                                                                                   | 52.919 | 24.768 | 18.4 | 9 | 15 | 9 | 0.93  | 0.978 | 0.96  | 1.067 | 1.072 | 1.033 | 1.106 | 5.78E-03 |
| cds.Camellia_sinensis.comp3203_6_c0_seq1_m.17656 | PREDICT<br>ED:<br>probable<br>solanesyl-<br>diphosphat-<br>e synthase<br>3,<br>chloroplast<br>ic [Ricinus<br>communis]                                               | 46.323 | 4.6719 | 6.7  | 3 | 4  | 3 | 0.974 | 0.973 | 1.02  | 0.968 | 0.957 | 1.118 | 1.026 | 6.83E-01 |

|                                                  |                                                                                         |        |        |      |    |    |    |       |       |       |       |       |       |       |          |
|--------------------------------------------------|-----------------------------------------------------------------------------------------|--------|--------|------|----|----|----|-------|-------|-------|-------|-------|-------|-------|----------|
| cds.Camellia_sinensis.comp3203_7_c2_seq4_m.5633  | PREDICT ED: KH domain-containing protein At4g1837 5 isoform X2 [Eucalyptus grandis]     | 58.48  | 97.132 | 40.2 | 19 | 24 | 17 | 1.022 | 1.04  | 1.04  | 0.996 | 0.956 | 0.946 | 0.934 | 1.52E-02 |
| cds.Camellia_sinensis.comp3203_7_c2_seq5_m.11381 | PREDICT ED: KH domain-containing protein At4g1837 5-like isoform X1 [Nicotiana tabacum] | 57.174 | 128.33 | 26.6 | 14 | 18 | 13 | 1.042 | 1.059 | 1.049 | 0.933 | 0.963 | 0.957 | 0.906 | 7.76E-04 |
| cds.Camellia_sinensis.comp3203_8_c0_seq1_m.13087 | PREDICT ED: auxilin-related protein 2 [Vitis vinifera]                                  | 84.421 | 4.8131 | 2.6  | 2  | 3  | 2  | 1.144 | 1.224 | 1.125 | 0.693 | 0.791 | 0.966 | 0.701 | 2.20E-02 |
| cds.Camellia_sinensis.comp3204_0_c0_seq9_m.9512  | PREDICT ED: probable lactoylglutathione lyase, chloroplastic [Citrus sinensis]          | 38.267 | 65.407 | 36.8 | 12 | 46 | 6  | 0.962 | 0.95  | 0.983 | 1.04  | 1.031 | 1.032 | 1.072 | 2.56E-03 |







|                                                  |                                                                                                            |        |        |      |    |    |    |       |       |       |       |       |       |       |          |
|--------------------------------------------------|------------------------------------------------------------------------------------------------------------|--------|--------|------|----|----|----|-------|-------|-------|-------|-------|-------|-------|----------|
| cds.Camellia_sinensis.comp3209.4_c0_seq1_m.5391  | PREDICTED: LOW QUALITY PROTEIN: calcium-transporting ATPase 4, plasma membrane-type-like [Ziziphus jujuba] | 116.18 | 23.398 | 7.9  | 8  | 12 | 6  | 0.962 | 0.94  | 0.921 | 1.069 | 1.051 | 1.076 | 1.132 | 9.97E-04 |
| cds.Camellia_sinensis.comp3209.5_c0_seq1_m.21396 | PREDICTED: fructose-1,6-bisphosphatase, cytosolic [Jatropha curcas]                                        | 51.329 | 79.64  | 28.3 | 10 | 11 | 10 | 0.93  | 0.945 | 0.944 | 1.054 | 1.088 | 1.084 | 1.144 | 2.80E-04 |
| cds.Camellia_sinensis.comp3209.8_c0_seq3_m.35699 | PREDICTED: glycine-rich RNA-binding protein 2, mitochondrial-like isoform X2 [Nicotiana tomentosiformis]   | 28.961 | 134.76 | 21.5 | 4  | 8  | 1  | 1.077 | 0.956 | 0.998 | 1.046 | 0.977 | 0.95  | 0.981 | 6.96E-01 |

|                                                  |                                                                       |        |        |      |    |    |    |       |       |       |       |       |       |       |          |
|--------------------------------------------------|-----------------------------------------------------------------------|--------|--------|------|----|----|----|-------|-------|-------|-------|-------|-------|-------|----------|
|                                                  | PREDICT<br>ED:                                                        |        |        |      |    |    |    |       |       |       |       |       |       |       |          |
| cds.Camellia_sinensis.comp3209_8_c0_seq8_m.39893 | glycine-rich RNA-binding protein blt801 [Vitis vinifera]              | 16.541 | 1.8011 | 37.3 | 4  | 9  | 1  | 0.976 | 1.014 | 0.973 | 0.989 | 1.062 | 1     | 1.03  | 3.25E-01 |
|                                                  | PREDICT<br>ED: RNA-binding protein Musashi homolog 2 [Vitis vinifera] |        |        |      |    |    |    |       |       |       |       |       |       |       |          |
| cds.Camellia_sinensis.comp3209_8_c1_seq1_m.2920  |                                                                       | 40.367 | 43.45  | 22.1 | 7  | 9  | 2  |       |       |       |       |       |       |       |          |
|                                                  | PREDICT<br>ED:                                                        |        |        |      |    |    |    |       |       |       |       |       |       |       |          |
| cds.Camellia_sinensis.comp3209_8_c1_seq4_m.23978 | heterogeneous nuclear ribonucleoprotein A/B [Ziziphus jujuba]         | 39.804 | 2.5328 | 19.4 | 6  | 9  | 1  | 0.941 | 0.985 | 0.967 | 1.033 | 1.057 | 1.041 | 1.082 | 6.02E-03 |
|                                                  | PREDICT<br>ED:                                                        |        |        |      |    |    |    |       |       |       |       |       |       |       |          |
| cds.Camellia_sinensis.comp3209_8_c3_seq1_m.36836 | calmodulin-7 isoform X1 [Vitis vinifera]                              | 16.848 | 125.03 | 55   | 11 | 46 | 11 | 1.001 | 0.967 | 0.97  | 1.004 | 1.046 | 1.034 | 1.05  | 4.21E-02 |





|                                                 |                                                                                      |        |        |      |   |   |   |       |       |       |       |       |       |       |          |
|-------------------------------------------------|--------------------------------------------------------------------------------------|--------|--------|------|---|---|---|-------|-------|-------|-------|-------|-------|-------|----------|
| cds.Camellia_sinensis.comp32116_c0_seq3_m.15155 | PREDICTED:<br>probable protein phosphatase 2C 60 isoform X1<br>[Nelumbo nucifera]    | 25.977 | 6.0133 | 15.8 | 5 | 7 | 4 | 0.942 | 0.946 | 0.993 | 1.05  | 1.035 | 1.039 | 1.084 | 9.62E-03 |
| cds.Camellia_sinensis.comp32116_c0_seq6_m.22215 | PREDICTED:<br>probable protein phosphatase 2C 60<br>[Pyrus x bretschneideri]         | 10.92  | 1.3693 | 8.1  | 1 | 1 | 1 |       |       |       |       |       |       |       |          |
| cds.Camellia_sinensis.comp32119_c0_seq1_m.26230 | PREDICTED:<br>protein FLX-like 1<br>[Nelumbo nucifera]                               | 33.426 | 4.9706 | 9.1  | 3 | 3 | 2 | 1.008 | 0.99  | 0.988 | 1.048 | 0.932 | 1.044 | 1.013 | 7.88E-01 |
| cds.Camellia_sinensis.comp32127_c0_seq1_m.30393 | PREDICTED:<br>short-chain dehydrogenase TIC 32,<br>chloroplastic<br>[Vitis vinifera] | 34.14  | 63.954 | 16.8 | 3 | 4 | 3 | 0.975 | 1.035 | 0.968 | 0.963 | 1.018 | 1.009 | 1.004 | 8.86E-01 |
| cds.Camellia_sinensis.comp32128_c0_seq1_m.17622 | PREDICTED:<br>fumarylacetate acetyltransferase<br>[Jatropha curcas]                  | 42.157 | 52.045 | 16.7 | 6 | 8 | 6 | 1.05  | 1.03  | 1.052 | 0.945 | 0.963 | 0.949 | 0.912 | 4.82E-04 |





|                                                  |                                                                   |        |        |      |    |    |    |       |       |       |       |       |       |       |          |
|--------------------------------------------------|-------------------------------------------------------------------|--------|--------|------|----|----|----|-------|-------|-------|-------|-------|-------|-------|----------|
|                                                  | PREDICT<br>ED:                                                    |        |        |      |    |    |    |       |       |       |       |       |       |       |          |
| cds.Camellia_sinensis.comp3215_5_c0_seq1_m.31991 | succinate dehydrogenase subunit 5, mitochondrial [Vitis vinifera] | 29.706 | 125.41 | 42.7 | 9  | 19 | 9  | 0.999 | 1.017 | 0.985 | 1.024 | 0.981 | 0.982 | 0.995 | 7.91E-01 |
|                                                  | PREDICT<br>ED:<br>protein                                         |        |        |      |    |    |    |       |       |       |       |       |       |       |          |
| cds.Camellia_sinensis.comp3215_8_c0_seq2_m.17123 | ASPARTIC ACID PROTEIN GUARD CELL 1-like [Nicotiana tabacum]       | 49.376 | 62.233 | 20.3 | 6  | 6  | 6  | 1.008 | 1.064 | 1.095 | 0.967 | 0.916 | 0.89  | 0.876 | 1.80E-02 |
|                                                  | PREDICT<br>ED:                                                    |        |        |      |    |    |    |       |       |       |       |       |       |       |          |
| cds.Camellia_sinensis.comp3215_8_c1_seq1_m.14727 | patellin-3 [Populus euphratica]                                   | 57.719 | 176.63 | 40.6 | 19 | 45 | 18 | 0.947 | 0.92  | 0.95  | 1.073 | 1.078 | 1.059 | 1.14  | 3.42E-04 |
|                                                  | PREDICT<br>ED: 3-                                                 |        |        |      |    |    |    |       |       |       |       |       |       |       |          |
| cds.Camellia_sinensis.comp3216_2_c0_seq1_m.28224 | hydroxyisobutyryl-CoA hydrolase 1-like [Juglans regia]            | 43.603 | 12.381 | 15   | 5  | 7  | 3  | 0.961 | 1.047 | 1.022 | 1.007 | 0.951 | 1.023 | 0.984 | 6.58E-01 |



|                                                 |                                                                                                                                                       |        |        |      |    |    |   |       |       |       |       |       |       |       |          |
|-------------------------------------------------|-------------------------------------------------------------------------------------------------------------------------------------------------------|--------|--------|------|----|----|---|-------|-------|-------|-------|-------|-------|-------|----------|
| cds.Camellia_sinensis.comp3217.5_c0_seq1_m.9849 | PREDICTED: trifunctional UDP-glucose 4,6-dehydratase/UDP-4-keto-6-deoxy-D-glucose 3,5-epimerase/UDP-4-keto-L-rhamnose-reductase RHM1 [Vitis vinifera] | 75.906 | 22.214 | 13.8 | 10 | 10 | 9 | 1.053 | 1.043 | 1.016 | 0.959 | 0.985 | 0.962 | 0.934 | 7.36E-03 |
| cds.Camellia_sinensis.comp3218.3_c0_seq1_m.8166 | PREDICTED: UDP-N-acetylmuramoyl-L-alanyl-D-glutamate-2,6-diaminopimelate ligase-like [Nicotiana tabacum]                                              | 86.924 | 2.953  | 2    | 2  | 2  | 2 | 1.063 | 1.098 | 1.123 | 0.872 | 0.914 | 0.91  | 0.821 | 8.40E-04 |





|                                                 |                                                                                                        |        |        |      |    |     |    |       |       |       |       |       |       |       |          |
|-------------------------------------------------|--------------------------------------------------------------------------------------------------------|--------|--------|------|----|-----|----|-------|-------|-------|-------|-------|-------|-------|----------|
| cds.Camellia_sinensis.comp32203_c0_seq1_m.3830  | PREDICTED:<br>presequence protease 1,<br>chloroplast ic/mitochondrial-like isoform X1<br>[Ipomoea nil] | 134.51 | 323.31 | 47.1 | 54 | 133 | 54 | 0.998 | 0.993 | 0.99  | 1.008 | 1.01  | 1.013 | 1.017 | 3.78E-03 |
| cds.Camellia_sinensis.comp32205_c0_seq1_m.13071 | PREDICTED: outer envelope protein 64, chloroplast ic-like<br>[Nelumbo nucifera]                        | 64.388 | 4.7647 | 10.5 | 7  | 7   | 4  | 1.043 | 1.014 | 0.95  | 0.946 | 0.967 | 1.078 | 0.995 | 9.05E-01 |
| cds.Camellia_sinensis.comp32205_c0_seq2_m.13339 | PREDICTED: outer envelope protein 64, chloroplast ic-like<br>[Nelumbo nucifera]                        | 64.334 | 48.641 | 24.2 | 13 | 16  | 10 | 0.953 | 0.969 | 0.959 | 1.043 | 1.078 | 1.052 | 1.101 | 9.38E-04 |
| cds.Camellia_sinensis.comp32207_c0_seq1_m.13675 | PREDICTED:<br>phosphomannomutase/phosphoglucomutase isoform X1<br>[Prunus                              | 69.24  | 40.24  | 20.3 | 11 | 18  | 11 | 0.976 | 0.954 | 0.971 | 1.026 | 1.018 | 1.048 | 1.066 | 4.54E-03 |

|                                                  |                                                                             |        |        |      |    |    |   |       |       |       |       |       |       |       |          |
|--------------------------------------------------|-----------------------------------------------------------------------------|--------|--------|------|----|----|---|-------|-------|-------|-------|-------|-------|-------|----------|
| cds.Camellia_sinensis.comp3220.9_c0_seq1_m.29095 | arginase 1<br>[Solanum lycopersicum]                                        | 41.886 | 86.806 | 30.4 | 10 | 21 | 9 | 1.041 | 1.117 | 1.08  | 0.938 | 0.922 | 0.914 | 0.857 | 2.08E-03 |
| cds.Camellia_sinensis.comp3221.2_c1_seq1_m.2978  | PREDICTED:<br>pumilio homolog 2<br>[Theobroma cacao]                        | 113.63 | 30.888 | 5.8  | 4  | 4  | 4 | 1.041 | 1.014 | 1.017 | 1.067 | 0.957 | 1.009 | 0.987 | 6.95E-01 |
| cds.Camellia_sinensis.comp3221.2_c2_seq1_m.2678  | PREDICTED: ABC transporter B family member 1<br>[Ipomoea nil]               | 147.41 | 7.0531 | 5.1  | 5  | 6  | 4 | 1.104 | 0.98  | 1.126 | 0.895 | 0.952 | 0.927 | 0.864 | 3.70E-02 |
| cds.Camellia_sinensis.comp3221.4_c0_seq1_m.34384 | PREDICTED: 14-3-3-like protein GF14 kappa<br>[Daucus carota subsp. sativus] | 28.611 | 80.223 | 53.8 | 13 | 33 | 6 | 0.951 | 0.953 | 0.881 | 1.108 | 1.104 | 1.051 | 1.172 | 6.84E-03 |
| cds.Camellia_sinensis.comp3221.4_c0_seq3_m.43656 | PREDICTED: 14-3-3-like protein GF14 kappa<br>[Daucus carota subsp. sativus] | 20.201 | 56.274 | 47.5 | 6  | 20 | 3 | 1.017 | 1.01  | 0.953 | 0.984 | 1.083 | 0.993 | 1.027 | 5.20E-01 |



|                                |                                                                                          |        |        |      |    |    |    |       |       |       |       |       |       |       |          |
|--------------------------------|------------------------------------------------------------------------------------------|--------|--------|------|----|----|----|-------|-------|-------|-------|-------|-------|-------|----------|
| cds.Camellia_sinensis.comp3222 | PREDICT<br>ED:<br>phosphoenolpyruvate carboxylase 4<br>[Eucalyptus grandis]              | 119.31 | 126.11 | 26.4 | 27 | 37 | 27 | 1.02  | 1.004 | 1.029 | 0.978 | 0.983 | 0.978 | 0.963 | 6.80E-03 |
| cds.Camellia_sinensis.comp3223 | PREDICT<br>ED: ABC transporter C family member 10-like<br>[Populus euphratica]           | 147.83 | 11.382 | 2.9  | 3  | 5  | 1  | 1.162 | 0.973 | 0.83  | 1.012 | 0.99  | 1.025 | 1.021 | 7.88E-01 |
| cds.Camellia_sinensis.comp3223 | PREDICT<br>ED:<br>serine/threonine-protein phosphatase 5 isoform X2<br>[Jatropha curcas] | 54.998 | 3.4471 | 6.2  | 3  | 4  | 3  | 0.982 | 0.994 | 0.988 | 1.076 | 1.031 | 0.949 | 1.031 | 5.13E-01 |
| cds.Camellia_sinensis.comp3223 |                                                                                          | 13.007 | 32.337 | 42.6 | 6  | 14 | 6  | 1.102 | 0.986 | 0.994 | 0.902 | 0.995 | 1.025 | 0.948 | 3.67E-01 |



|                                                  |                                                                                       |        |        |      |    |     |   |       |       |       |       |       |       |       |          |
|--------------------------------------------------|---------------------------------------------------------------------------------------|--------|--------|------|----|-----|---|-------|-------|-------|-------|-------|-------|-------|----------|
| cds.Camellia_sinensis.comp3224.5_c0_seq1_m.4096  | PREDICTED:<br>probable 26S protease regulatory subunit 10B isoform X2 [Juglans regia] | 50.495 | 1.3175 | 2.4  | 1  | 1   | 1 | 0.943 | 1.114 | 0.957 | 0.963 | 0.997 | 1.034 | 0.993 | 9.45E-01 |
| cds.Camellia_sinensis.comp3224.5_c0_seq1_m.4098  | PREDICTED:<br>probable 26S protease regulatory subunit 10B isoform X1 [Juglans regia] | 19.299 | 2.4147 | 13.5 | 2  | 2   | 2 |       |       |       |       |       |       |       |          |
| cds.Camellia_sinensis.comp3225.4_c0_seq1_m.30872 | PREDICTED:<br>strigolactone esterase D14 [Juglans regia]                              | 32.449 | 36.651 | 21.9 | 6  | 12  | 6 | 1.024 | 1.049 | 1.055 | 0.945 | 0.961 | 0.941 | 0.91  | 1.08E-03 |
| cds.Camellia_sinensis.comp3226.2_c0_seq1_m.19868 | PREDICTED:<br>actin-7 [Prunus mume]                                                   | 41.695 | 253.54 | 47.5 | 17 | 120 | 2 | 0.991 | 1.021 | 1.004 | 1.015 | 0.98  | 0.988 | 0.989 | 4.65E-01 |



|                       |                                                           |        |        |      |   |    |   |       |       |       |       |       |       |       |          |
|-----------------------|-----------------------------------------------------------|--------|--------|------|---|----|---|-------|-------|-------|-------|-------|-------|-------|----------|
| PREDICT               |                                                           |        |        |      |   |    |   |       |       |       |       |       |       |       |          |
| ED:                   |                                                           |        |        |      |   |    |   |       |       |       |       |       |       |       |          |
| cds.Camellia_sinensis | germin-like protein subfamily 1 [Juglans regia]           | 22.619 | 29.867 | 27.2 | 5 | 13 | 5 | 0.898 | 0.901 | 0.932 | 1.133 | 1.14  | 1.091 | 1.232 | 3.24E-04 |
| PREDICT               |                                                           |        |        |      |   |    |   |       |       |       |       |       |       |       |          |
| ED:                   |                                                           |        |        |      |   |    |   |       |       |       |       |       |       |       |          |
| cds.Camellia_sinensis | protein SHOOT GRAVITR OPISM 6 isoform X2 [Vitis vinifera] | 62.846 | 5.9657 | 2.1  | 1 | 1  | 1 | 0.959 | 0.981 | 1.025 | 1.146 | 0.988 | 0.928 | 1.033 | 6.85E-01 |
| PREDICT               |                                                           |        |        |      |   |    |   |       |       |       |       |       |       |       |          |
| ED:                   |                                                           |        |        |      |   |    |   |       |       |       |       |       |       |       |          |
| cds.Camellia_sinensis | protein SHOOT GRAVITR OPISM 6 isoform X4 [Vitis vinifera] | 68.995 | 5.3556 | 5.5  | 3 | 3  | 3 | 0.979 | 0.993 | 0.957 | 1.167 | 0.976 | 0.952 | 1.057 | 4.76E-01 |
| PREDICT               |                                                           |        |        |      |   |    |   |       |       |       |       |       |       |       |          |
| ED:                   |                                                           |        |        |      |   |    |   |       |       |       |       |       |       |       |          |
| cds.Camellia_sinensis | serine/threonine-kinase HT1-like [Sesamum indicum]        | 41.091 | 8.8736 | 6.5  | 2 | 3  | 2 | 0.88  | 0.876 | 0.964 | 1.122 | 1.048 | 1.162 | 1.225 | 9.54E-03 |





|                                |                                                                                                                                                          |        |        |      |   |    |   |       |       |       |       |       |       |       |          |
|--------------------------------|----------------------------------------------------------------------------------------------------------------------------------------------------------|--------|--------|------|---|----|---|-------|-------|-------|-------|-------|-------|-------|----------|
| cds.Camellia_sinensis.comp3230 | PREDICT<br>ED:<br>phenylalanine<br>ammonia-lyase<br>[Vitis<br>vinifera]<br>NADPH:QUINONE<br>OXIDOREDUCTASE family<br>protein<br>[Populus<br>trichocarpa] | 30.151 | 2.475  | 15.7 | 5 | 10 | 0 |       |       |       |       |       |       |       |          |
| cds.Camellia_sinensis.comp3231 | OXIDOREDUCTASE family<br>protein<br>[Populus<br>trichocarpa]                                                                                             | 22.987 | 38.035 | 31.2 | 4 | 4  | 4 | 0.963 | 1.054 | 1.012 | 1.034 | 0.953 | 0.968 | 0.976 | 5.32E-01 |
| cds.Camellia_sinensis.comp3231 | PREDICT<br>ED:<br>protein<br>BONZAI<br>1-like<br>[Juglans<br>regia]                                                                                      | 65.25  | 1.3509 | 3    | 2 | 2  | 2 | 0.897 | 1.011 | 0.889 | 1.173 | 1.085 | 0.988 | 1.161 | 8.37E-02 |
| cds.Camellia_sinensis.comp3231 | PREDICT<br>ED:<br>guanine<br>nucleotide-binding<br>protein<br>subunit<br>beta-2<br>[Citrus<br>sinensis]                                                  | 41.112 | 10.711 | 8    | 3 | 4  | 3 | 0.98  | 0.951 | 0.963 | 1.03  | 1.067 | 1.045 | 1.086 | 3.62E-03 |

|                                |                   |                                                                                                                |        |        |      |   |    |   |       |       |       |       |       |       |       |          |
|--------------------------------|-------------------|----------------------------------------------------------------------------------------------------------------|--------|--------|------|---|----|---|-------|-------|-------|-------|-------|-------|-------|----------|
| cds.Camellia_sinensis.comp3231 | 5_c0_seq4_m.34834 | PREDICTED:<br>protein<br>LUTEIN DEFICIENT 5,<br>chloroplastic<br>[Ipomoea nil]                                 | 34.82  | 1.8687 | 2.9  | 1 | 1  | 1 |       |       |       |       |       |       |       |          |
| cds.Camellia_sinensis.comp3232 | 1_c0_seq1_m.22581 | PREDICTED:<br>V-type<br>proton ATPase subunit H<br>[Theobroma cacao]                                           | 55.987 | 59.034 | 15.4 | 7 | 11 | 7 | 0.967 | 0.959 | 0.974 | 1.044 | 1.077 | 1.006 | 1.078 | 2.07E-02 |
| cds.Camellia_sinensis.comp3232 | 3_c0_seq1_m.26511 | PREDICTED:<br>pyruvate dehydrogenase (acetyl-transferring) kinase, mitochondrial-like<br>[Nicotiana attenuata] | 41.962 | 1.5816 | 4.3  | 1 | 1  | 1 |       |       |       |       |       |       |       |          |
| cds.Camellia_sinensis.comp3232 | 4_c0_seq8_m.30857 | PREDICTED:<br>probable polyamine aminopropyl transferase<br>[Malus domestica]                                  | 18.543 | 3.8695 | 5.9  | 1 | 1  | 1 | 1.069 | 1.053 | 0.972 | 0.993 | 0.927 | 0.979 | 0.937 | 1.49E-01 |

|                       |                                                       |        |        |      |    |    |    |       |       |       |       |       |       |       |          |
|-----------------------|-------------------------------------------------------|--------|--------|------|----|----|----|-------|-------|-------|-------|-------|-------|-------|----------|
|                       | PREDICT                                               |        |        |      |    |    |    |       |       |       |       |       |       |       |          |
|                       | ED:                                                   |        |        |      |    |    |    |       |       |       |       |       |       |       |          |
| cds.Camellia_sinensis | putative 3,4-dihydroxy-2-butanone kinase [Malus]      | 53.565 | 109.98 | 36.3 | 15 | 25 | 15 | 0.959 | 0.946 | 0.938 | 1.088 | 1.029 | 1.044 | 1.112 | 4.10E-03 |
|                       | PREDICT                                               |        |        |      |    |    |    |       |       |       |       |       |       |       |          |
|                       | ED:                                                   |        |        |      |    |    |    |       |       |       |       |       |       |       |          |
| cds.Camellia_sinensis | transmembrane protein 33 homolog [Juglans regia]      | 17.468 | 42.018 | 19.9 | 2  | 3  | 2  | 0.934 | 0.938 | 0.954 | 1.032 | 1.099 | 1.026 | 1.117 | 8.58E-03 |
|                       | PREDICT                                               |        |        |      |    |    |    |       |       |       |       |       |       |       |          |
|                       | ED:                                                   |        |        |      |    |    |    |       |       |       |       |       |       |       |          |
| cds.Camellia_sinensis | glutamate dehydrogenase 2 [Gossypium raimondii]       | 32.818 | 18.896 | 24.3 | 6  | 9  | 4  | 0.973 | 0.965 | 0.942 | 1.122 | 1.015 | 1.075 | 1.115 | 2.40E-02 |
|                       | PREDICT                                               |        |        |      |    |    |    |       |       |       |       |       |       |       |          |
|                       | ED: fatty acid amide hydrolase-like [Sesamum indicum] | 66.642 | 2.9938 | 3.3  | 2  | 2  | 2  | 1.191 | 1.182 | 1.254 | 0.774 | 0.74  | 0.799 | 0.638 | 1.00E-04 |

|                                |                   |                                                                                   |        |        |      |    |     |    |       |       |       |       |       |       |       |          |
|--------------------------------|-------------------|-----------------------------------------------------------------------------------|--------|--------|------|----|-----|----|-------|-------|-------|-------|-------|-------|-------|----------|
| cds.Camellia_sinensis.comp3234 | 5_c0_seq1_m.37112 | PREDICTED:<br>proteasome subunit alpha type-2-A<br>[Daucus carota subsp. sativus] | 25.65  | 87.343 | 46   | 9  | 18  | 9  | 1.002 | 0.975 | 0.992 | 1.01  | 1.021 | 1.002 | 1.022 | 9.14E-02 |
| cds.Camellia_sinensis.comp3234 | 7_c1_seq1_m.26020 | PREDICTED:<br>phosphorylase kinase, chloroplastic-like<br>[Populus]               | 46.592 | 236.37 | 47.6 | 18 | 105 | 17 | 1.02  | 1.02  | 1     | 0.979 | 1     | 0.978 | 0.973 | 4.76E-02 |
| cds.Camellia_sinensis.comp3234 | 8_c0_seq1_m.12333 | PREDICTED:<br>flowering time control protein FCA isoform X3 [Vitis vinifera]      | 65.426 | 6.3868 | 3.1  | 2  | 2   | 2  | 1.011 | 1     | 0.995 | 0.996 | 1.037 | 0.969 | 0.999 | 9.37E-01 |
| cds.Camellia_sinensis.comp3235 | 6_c0_seq5_m.37866 | PREDICTED: 50S ribosomal protein HLP, mitochondrial isoform X3<br>[Nelumbo]       | 13.333 | 1.8762 | 8.1  | 1  | 1   | 1  | 0.887 | 1.035 | 1.109 | 1.084 | 0.889 | 1.019 | 0.987 | 8.98E-01 |

|                                                  |                                                                                        |        |        |      |    |    |    |       |       |       |       |       |       |       |          |
|--------------------------------------------------|----------------------------------------------------------------------------------------|--------|--------|------|----|----|----|-------|-------|-------|-------|-------|-------|-------|----------|
| cds.Camellia_sinensis.comp3236_0_c0_seq1_m.22186 | PREDICT<br>ED: 30S ribosomal protein S1-like<br>[Nicotiana tabacum]                    | 46.85  | 41.834 | 15.2 | 5  | 7  | 5  | 0.992 | 1.057 | 0.939 | 1.001 | 1.055 | 0.968 | 1.012 | 7.82E-01 |
| cds.Camellia_sinensis.comp3236_2_c0_seq1_m.5696  | PREDICT<br>ED: alpha-xylosidase 1-like<br>[Juglans regia]                              | 102.92 | 96.953 | 21   | 18 | 27 | 16 | 0.97  | 0.92  | 0.93  | 1.066 | 1.08  | 1.046 | 1.132 | 2.64E-03 |
| cds.Camellia_sinensis.comp3236_2_c0_seq2_m.6011  | PREDICT<br>ED: alpha-xylosidase 1-like<br>[Juglans regia]                              | 103    | 20.166 | 10.2 | 9  | 13 | 7  | 1.017 | 1.009 | 1.028 | 1.01  | 0.951 | 1.002 | 0.97  | 1.94E-01 |
| cds.Camellia_sinensis.comp3236_7_c0_seq1_m.5385  | PREDICT<br>ED:<br>protein translocase subunit SecA, chloroplastic [Vitis vinifera]     | 107.75 | 232.29 | 41.8 | 35 | 48 | 35 | 1.002 | 1.017 | 1.01  | 0.994 | 0.977 | 0.992 | 0.978 | 3.36E-02 |
| cds.Camellia_sinensis.comp3236_8_c0_seq1_m.6891  | PREDICT<br>ED:<br>linoleate 13S-lipoxygenase 3-1, chloroplastic<br>[Nicotiana tabacum] | 102.78 | 21.33  | 9.8  | 8  | 9  | 8  | 0.952 | 0.997 | 1.062 | 1.009 | 0.98  | 1.023 | 1     | 9.74E-01 |

|                                                 |                                                                                  |        |        |      |    |    |    |       |       |       |       |       |       |       |          |
|-------------------------------------------------|----------------------------------------------------------------------------------|--------|--------|------|----|----|----|-------|-------|-------|-------|-------|-------|-------|----------|
| cds.Camellia_sinensis.comp32370_c0_seq3_m.44534 | PREDICT ED: superoxide dismutase [Fe] 3, chloroplastic [Juglans regia]           | 27.666 | 1.2639 | 3.3  | 1  | 1  | 1  | 0.897 | 0.99  | 0.959 | 1.069 | 1.065 | 1.053 | 1.12  | 6.06E-02 |
| cds.Camellia_sinensis.comp32371_c0_seq1_m.8400  | PREDICT ED: nucleolin 2 [Prunus mume]                                            | 79.316 | 3.9865 | 2    | 1  | 1  | 1  | 1.251 | 1.248 | 1.228 | 0.744 | 0.722 | 0.735 | 0.591 | 4.70E-07 |
| cds.Camellia_sinensis.comp32375_c0_seq2_m.21212 | PREDICT ED: oxysterol-binding protein-related protein 3C-like [Nelumbo nucifera] | 51.934 | 11.64  | 9.9  | 4  | 4  | 3  | 1.034 | 1.021 | 1.122 | 1.041 | 0.847 | 0.933 | 0.888 | 1.42E-01 |
| cds.Camellia_sinensis.comp32378_c0_seq1_m.4555  | PREDICT ED: phosphatidylinositol 4-phosphate 5-kinase 9-like [Sesamum indicum]   | 92.934 | 1.9421 | 1    | 1  | 1  | 1  | 1.22  | 1.184 | 1.215 | 0.769 | 0.804 | 0.747 | 0.641 | 4.23E-05 |
| cds.Camellia_sinensis.comp32382_c0_seq1_m.25543 | PREDICT ED: 60S ribosomal protein L7-2-like [Ipomoea nil]                        | 28.589 | 51.596 | 44.7 | 10 | 14 | 10 | 1.139 | 1.172 | 1.166 | 0.796 | 0.863 | 0.82  | 0.713 | 1.78E-04 |

|                       |                                                                                               |        |        |      |    |    |    |       |       |       |       |       |       |       |          |
|-----------------------|-----------------------------------------------------------------------------------------------|--------|--------|------|----|----|----|-------|-------|-------|-------|-------|-------|-------|----------|
| PREDICT               |                                                                                               |        |        |      |    |    |    |       |       |       |       |       |       |       |          |
| cds.Camellia_sinensis | ED:<br>sucrose-<br>phosphatase 2-like<br>[Sesamum indicum]                                    | 48.112 | 162.33 | 31.6 | 12 | 24 | 12 | 1.037 | 1.053 | 0.985 | 0.955 | 0.963 | 0.961 | 0.936 | 8.45E-02 |
| PREDICT               |                                                                                               |        |        |      |    |    |    |       |       |       |       |       |       |       |          |
| cds.Camellia_sinensis | ED:<br>translation<br>initiation<br>factor eIF-2B subunit<br>beta-like<br>[Nicotiana tabacum] | 44.049 | 6.7722 | 6.7  | 3  | 3  | 2  | 0.934 | 1.001 | 1.034 | 0.992 | 1.041 | 1.016 | 1.027 | 4.56E-01 |
| PREDICT               |                                                                                               |        |        |      |    |    |    |       |       |       |       |       |       |       |          |
| cds.Camellia_sinensis | ED:<br>eukaryotic<br>translation<br>initiation<br>factor<br>[Vitis vinifera]                  | 87.118 | 109.52 | 29.4 | 23 | 32 | 23 | 0.961 | 0.96  | 0.949 | 1.038 | 1.055 | 1.073 | 1.103 | 7.01E-04 |
| PREDICT               |                                                                                               |        |        |      |    |    |    |       |       |       |       |       |       |       |          |
| cds.Camellia_sinensis | ED:<br>perakine<br>reductase-like<br>[Populus euphratica]                                     | 30.224 | 5.9833 | 7.4  | 2  | 3  | 1  |       |       |       |       |       |       |       |          |



|                                                  |                                                                              |        |        |      |   |    |   |       |       |       |       |       |       |       |          |  |
|--------------------------------------------------|------------------------------------------------------------------------------|--------|--------|------|---|----|---|-------|-------|-------|-------|-------|-------|-------|----------|--|
|                                                  | PREDICT<br>ED:<br>probable                                                   |        |        |      |   |    |   |       |       |       |       |       |       |       |          |  |
| cds.Camellia_sinensis.comp3239_3_c0_seq1_m.22641 | N-acetyl-gamma-glutamyl-phosphate reductase, chloroplast ic [Vitis vinifera] | 44.074 | 49.966 | 23.1 | 9 | 11 | 9 | 0.979 | 1.021 | 0.954 | 0.971 | 0.998 | 1.054 | 1.023 | 5.03E-01 |  |
|                                                  | PREDICT<br>ED:<br>probable                                                   |        |        |      |   |    |   |       |       |       |       |       |       |       |          |  |
| cds.Camellia_sinensis.comp3239_4_c0_seq7_m.10219 | acyl-activating enzyme 18, peroxisomal [Ziziphus                             | 81.183 | 52.494 | 14.9 | 9 | 10 | 9 | 1.289 | 1.404 | 1.323 | 0.588 | 0.58  | 0.607 | 0.442 | 4.53E-06 |  |
|                                                  | PREDICT<br>ED: 15.7                                                          |        |        |      |   |    |   |       |       |       |       |       |       |       |          |  |
| cds.Camellia_sinensis.comp3239_4_c0_seq9_m.12860 | kDa heat shock protein, peroxisomal [Solanum tuberosum                       | 18.83  | 5.4027 | 22.5 | 4 | 4  | 4 | 1.029 | 1.041 | 1.035 | 0.945 | 0.941 | 1.004 | 0.931 | 7.65E-02 |  |
|                                                  | PREDICT<br>ED: V-type                                                        |        |        |      |   |    |   |       |       |       |       |       |       |       |          |  |
| cds.Camellia_sinensis.comp3239_7_c0_seq1_m.21879 | proton ATPase subunit d2-like [Daucus carota subsp.                          | 40.616 | 10.037 | 15.1 | 6 | 8  | 6 | 0.987 | 1.007 | 0.965 | 0.985 | 1.045 | 1.018 | 1.03  | 2.34E-01 |  |

|                                |                   |                                                                               |        |        |      |    |    |    |       |       |       |       |       |       |       |          |
|--------------------------------|-------------------|-------------------------------------------------------------------------------|--------|--------|------|----|----|----|-------|-------|-------|-------|-------|-------|-------|----------|
| cds.Camellia_sinensis.comp3240 | 1_c0_seq1_m.44336 | PREDICTED:<br>uroporphyrinogen decarboxylase, chloroplastic [Ipomoea nil]     | 21.735 | 14.659 | 23.2 | 3  | 6  | 3  | 1.009 | 0.978 | 0.893 | 1.062 | 1.023 | 1.042 | 1.086 | 9.41E-02 |
| cds.Camellia_sinensis.comp3240 | 2_c0_seq1_m.10103 | PREDICTED:<br>zeaxanthin epoxidase, chloroplastic [Juglans regia]             | 73.508 | 66.786 | 27.4 | 18 | 32 | 18 | 1.015 | 0.997 | 1.005 | 0.979 | 1     | 1.004 | 0.989 | 2.92E-01 |
| cds.Camellia_sinensis.comp3241 | 0_c0_seq1_m.12637 | PREDICTED:<br>protein TOPLESS-like, partial [Juglans regia] P-loop nucleoside | 48.81  | 27.386 | 15   | 6  | 7  | 5  | 0.903 | 0.905 | 0.938 | 1.074 | 1.108 | 1.074 | 1.186 | 4.56E-04 |
| cds.Camellia_sinensis.comp3241 | 3_c0_seq1_m.18086 | triphosphate hydrolase superfamily protein [Medicago truncatula]              | 57.784 | 12.969 | 10.1 | 5  | 6  | 5  | 1.01  | 1.027 | 1.059 | 0.983 | 0.948 | 0.97  | 0.937 | 2.04E-02 |

|                                                  |                                                                            |        |        |      |    |    |   |       |       |       |       |       |       |       |          |
|--------------------------------------------------|----------------------------------------------------------------------------|--------|--------|------|----|----|---|-------|-------|-------|-------|-------|-------|-------|----------|
|                                                  | PREDICT                                                                    |        |        |      |    |    |   |       |       |       |       |       |       |       |          |
|                                                  | ED:                                                                        |        |        |      |    |    |   |       |       |       |       |       |       |       |          |
| cds.Camellia_sinensis.comp3241_9_c0_seq1_m.20477 | serine/threonine-kinase SRK2A [Vitis vinifera]                             | 41.231 | 4.688  | 14   | 5  | 6  | 3 | 1.09  | 1.077 | 1.077 | 0.917 | 0.909 | 0.911 | 0.844 | 1.88E-06 |
|                                                  | PREDICT                                                                    |        |        |      |    |    |   |       |       |       |       |       |       |       |          |
|                                                  | ED:                                                                        |        |        |      |    |    |   |       |       |       |       |       |       |       |          |
| cds.Camellia_sinensis.comp3242_9_c0_seq3_m.4590  | putative late blight resistance protein homolog R1B-14 [Solanum pennellii] | 96.321 | 7.4915 | 5.7  | 5  | 6  | 5 | 0.957 | 0.96  | 1.03  | 1.042 | 1.049 | 0.973 | 1.04  | 3.15E-01 |
|                                                  | PREDICT                                                                    |        |        |      |    |    |   |       |       |       |       |       |       |       |          |
|                                                  | ED:                                                                        |        |        |      |    |    |   |       |       |       |       |       |       |       |          |
| cds.Camellia_sinensis.comp3243_2_c0_seq1_m.18622 | calcium-dependent protein kinase 1-like [Nelumbo nucifera]                 | 57.26  | 45.757 | 23.2 | 10 | 12 | 6 | 1.045 | 0.991 | 0.994 | 0.949 | 1.067 | 1.02  | 1.002 | 9.78E-01 |

|                                                  |                                                                                                                          |        |        |      |    |    |    |       |       |       |       |       |       |       |          |
|--------------------------------------------------|--------------------------------------------------------------------------------------------------------------------------|--------|--------|------|----|----|----|-------|-------|-------|-------|-------|-------|-------|----------|
| cds.Camellia_sinensis.comp3243_4_c0_seq1_m.25833 | PREDICT<br>ED: 4-diphosphocytidyl-2-C-methyl-D-erythritol kinase, chloroplastic/chromoplastic [Nicotiana attenuata]      | 45.215 | 21.832 | 11.5 | 4  | 6  | 4  | 1.005 | 1.017 | 1.029 | 1.034 | 0.972 | 1.019 | 0.991 | 6.79E-01 |
| cds.Camellia_sinensis.comp3243_4_c0_seq3_m.38079 | PREDICT<br>ED: 4-diphosphocytidyl-2-C-methyl-D-erythritol kinase, chloroplastic/chromoplastic isoform X2[Vitis vinifera] | 28.668 | 3.2328 | 8.4  | 2  | 4  | 2  | 1.011 | 0.979 | 1.027 | 1.09  | 0.986 | 0.923 | 0.994 | 8.80E-01 |
| cds.Camellia_sinensis.comp3243_7_c0_seq1_m.8865  | PREDICT<br>ED: acyl-CoA dehydrogenase family member 10 [Jatropha                                                         | 92.395 | 40.355 | 15.3 | 12 | 19 | 12 | 0.955 | 1.01  | 0.96  | 1.005 | 1.036 | 1.01  | 1.043 | 1.04E-01 |



|                                |                                                                                                                                                                                      |        |        |      |    |    |    |       |       |       |       |       |       |       |          |
|--------------------------------|--------------------------------------------------------------------------------------------------------------------------------------------------------------------------------------|--------|--------|------|----|----|----|-------|-------|-------|-------|-------|-------|-------|----------|
| cds.Camellia_sinensis.comp3244 | PREDICT<br>ED: 3-hydroxyisobutyryl-CoA hydrolase-like protein 3, mitochondrial isoform X1 [Juglans phosphoglycerate mutase family protein                                            | 32.919 | 23.432 | 24.5 | 7  | 12 | 7  | 1.008 | 0.958 | 1.016 | 1.01  | 0.955 | 1.026 | 1.003 | 9.24E-01 |
| 8_c0_seq2_m.29251              | truncatula] PREDICT<br>ED:<br>lysine--tRNA ligase, cytoplasmic-like [Gossypium hirsutum] PREDICT<br>ED:<br>probable galactinol--sucrose galactosyltransferase 2 [Eucalyptus grandis] |        |        |      |    |    |    |       |       |       |       |       |       |       |          |
| cds.Camellia_sinensis.comp3245 | 1_c0_seq1_m.37243                                                                                                                                                                    | 30.907 | 12.848 | 13.6 | 3  | 3  | 3  | 1.068 | 0.956 | 1     | 1.01  | 1.01  | 0.959 | 0.985 | 7.16E-01 |
| cds.Camellia_sinensis.comp3245 | 3_c0_seq1_m.12949                                                                                                                                                                    | 69.931 | 94.876 | 37.2 | 25 | 36 | 25 | 0.965 | 0.953 | 0.947 | 1.038 | 1.037 | 1.042 | 1.088 | 1.22E-04 |
| cds.Camellia_sinensis.comp3245 | 8_c0_seq1_m.14581                                                                                                                                                                    | 64.87  | 86.998 | 19.5 | 12 | 20 | 12 | 1.139 | 1.189 | 1.21  | 0.835 | 0.79  | 0.795 | 0.684 | 1.15E-04 |

|                                                  |                                                                       |        |        |      |   |    |   |       |       |       |       |       |       |       |          |
|--------------------------------------------------|-----------------------------------------------------------------------|--------|--------|------|---|----|---|-------|-------|-------|-------|-------|-------|-------|----------|
|                                                  | PREDICT                                                               |        |        |      |   |    |   |       |       |       |       |       |       |       |          |
|                                                  | ED:                                                                   |        |        |      |   |    |   |       |       |       |       |       |       |       |          |
| cds.Camellia_sinensis.comp3245_8_c1_seq1_m.45032 | probable galactinol-sucrose galactosyltransferase 2 [Citrus sinensis] | 18.413 | 46.075 | 30.8 | 3 | 6  | 2 | 1.227 | 1.145 | 1.162 | 0.755 | 0.835 | 0.805 | 0.678 | 4.21E-04 |
|                                                  | PREDICT                                                               |        |        |      |   |    |   |       |       |       |       |       |       |       |          |
|                                                  | ED:                                                                   |        |        |      |   |    |   |       |       |       |       |       |       |       |          |
| cds.Camellia_sinensis.comp3245_8_c1_seq2_m.46697 | probable galactinol-sucrose galactosyltransferase 2 [Sesamum indicum] | 18.472 | 1.2074 | 20.1 | 2 | 4  | 1 | 1.028 | 1.013 | 0.985 | 1.112 | 0.727 | 1.138 | 0.984 | 8.27E-01 |
|                                                  | PREDICT                                                               |        |        |      |   |    |   |       |       |       |       |       |       |       |          |
|                                                  | ED: serine                                                            |        |        |      |   |    |   |       |       |       |       |       |       |       |          |
| cds.Camellia_sinensis.comp3245_9_c1_seq1_m.24665 | carboxypeptidase-like 18 [Jatropha curcas]                            | 52.937 | 11.819 | 17.6 | 6 | 9  | 4 | 0.94  | 0.965 | 0.954 | 1.05  | 1.027 | 1.088 | 1.107 | 5.32E-03 |
|                                                  | PREDICT                                                               |        |        |      |   |    |   |       |       |       |       |       |       |       |          |
|                                                  | ED:                                                                   |        |        |      |   |    |   |       |       |       |       |       |       |       |          |
| cds.Camellia_sinensis.comp3246_0_c0_seq1_m.14509 | reticuline oxidase-like protein [Eucalyptus grandis]                  | 46.143 | 17.56  | 16.8 | 8 | 12 | 7 | 1.006 | 1.009 | 1.015 | 0.989 | 0.941 | 1.05  | 0.983 | 6.35E-01 |

|                                                  |                                                                                                  |        |        |      |    |    |    |       |       |       |       |       |       |       |          |
|--------------------------------------------------|--------------------------------------------------------------------------------------------------|--------|--------|------|----|----|----|-------|-------|-------|-------|-------|-------|-------|----------|
| cds.Camellia_sinensis.comp3246_7_c0_seq1_m.27579 | PREDICT<br>ED: 2-methylene-furan-3-one reductase<br>[Theobroma cacao]                            | 42.717 | 279.91 | 52.5 | 19 | 66 | 19 | 1.057 | 1.017 | 1.004 | 0.964 | 0.964 | 0.978 | 0.944 | 2.40E-02 |
| cds.Camellia_sinensis.comp3247_1_c0_seq4_m.12264 | PREDICT<br>ED:<br>NEDD8-activating enzyme E1 regulatory subunit AXR1 isoform X1 [Vitis vinifera] | 64.292 | 42.122 | 16   | 8  | 10 | 0  |       |       |       |       |       |       |       |          |
| cds.Camellia_sinensis.comp3247_5_c0_seq1_m.12477 | PREDICT<br>ED:<br>vacuolar-sorting receptor 3<br>[Theobroma cacao]                               | 69.884 | 4.3057 | 14.4 | 7  | 8  | 1  | 1.015 | 0.979 | 1.027 | 1.031 | 1.013 | 0.947 | 0.99  | 7.42E-01 |
| cds.Camellia_sinensis.comp3247_5_c0_seq2_m.12762 | PREDICT<br>ED:<br>vacuolar-sorting receptor 3-like<br>[Juglans regia]                            | 69.568 | 58.183 | 18   | 9  | 10 | 3  | 1.016 | 1.044 | 1.106 | 0.998 | 0.971 | 0.867 | 0.896 | 8.92E-02 |





|                                                  |                                                                                                           |        |        |      |   |   |   |       |       |       |       |       |       |       |          |
|--------------------------------------------------|-----------------------------------------------------------------------------------------------------------|--------|--------|------|---|---|---|-------|-------|-------|-------|-------|-------|-------|----------|
| cds.Camellia_sinensis.comp3250_1_c0_seq3_m.20794 | PREDICT<br>ED: kelch domain-containing protein 3 isoform X3 [Vitis vinifera]                              | 57.433 | 3.2848 | 1.9  | 1 | 1 | 1 | 1.087 | 0.824 | 1.134 | 0.947 | 1.06  | 0.948 | 0.97  | 8.49E-01 |
| cds.Camellia_sinensis.comp3250_2_c1_seq1_m.40785 | PREDICT<br>ED: glutamyl-tRNA(Gln)<br>)amidotransferase subunit C, chloroplastic/mitochondrial-like [Vitis | 17.402 | 11.111 | 9.2  | 1 | 3 | 1 | 1.059 | 1.001 | 1.004 | 0.992 | 0.994 | 0.95  | 0.958 | 1.45E-01 |
| cds.Camellia_sinensis.comp3250_6_c0_seq2_m.22896 | PREDICT<br>ED: peptide chain release factor PrfB1, chloroplastic [Sesamum indicum]                        | 27.069 | 11.607 | 22.2 | 6 | 9 | 6 | 0.987 | 1.028 | 1.067 | 1.025 | 0.99  | 0.95  | 0.962 | 2.86E-01 |





|                                                  |                                                              |        |        |     |   |   |   |       |       |       |       |       |       |       |          |
|--------------------------------------------------|--------------------------------------------------------------|--------|--------|-----|---|---|---|-------|-------|-------|-------|-------|-------|-------|----------|
|                                                  | PREDICT<br>ED: WPP                                           |        |        |     |   |   |   |       |       |       |       |       |       |       |          |
| cds.Camellia_sinensis.comp3252_3_c1_seq1_m.11627 | domain-interacting tail-anchored protein 1 [Vitis vinifera]  | 77.162 | 1.5994 | 3.6 | 3 | 3 | 3 | 0.867 | 1.042 | 1.107 | 1.051 | 0.962 | 0.998 | 0.998 | 9.71E-01 |
|                                                  | PREDICT<br>ED:                                               |        |        |     |   |   |   |       |       |       |       |       |       |       |          |
| cds.Camellia_sinensis.comp3252_6_c0_seq1_m.7405  | nuclear pore complex protein NUP85 [Vitis vinifera]          | 80.37  | 27.331 | 8.4 | 4 | 5 | 4 | 0.952 | 1.008 | 1.105 | 1.148 | 0.877 | 0.965 | 0.976 | 7.62E-01 |
|                                                  | PREDICT<br>ED:                                               |        |        |     |   |   |   |       |       |       |       |       |       |       |          |
| cds.Camellia_sinensis.comp3252_8_c0_seq1_m.20398 | hydroxymethylglutaryl-CoA synthase-like [Gossypium arboreum] | 51.699 | 6.5554 | 8.9 | 4 | 5 | 3 | 1.009 | 1.014 | 0.913 | 1.081 | 1.04  | 1.026 | 1.072 | 1.35E-01 |
|                                                  | PREDICT<br>ED:                                               |        |        |     |   |   |   |       |       |       |       |       |       |       |          |
| cds.Camellia_sinensis.comp3252_8_c0_seq2_m.21516 | hydroxymethylglutaryl-CoA synthase [Theobroma cacao]         | 51.561 | 21.405 | 8.1 | 4 | 5 | 3 | 0.949 | 0.98  | 0.939 | 1.052 | 1.022 | 1.121 | 1.114 | 2.36E-02 |

|                                                  |                                                                   |        |        |      |    |    |    |       |       |       |       |       |       |       |          |
|--------------------------------------------------|-------------------------------------------------------------------|--------|--------|------|----|----|----|-------|-------|-------|-------|-------|-------|-------|----------|
| cds.Camellia_sinensis.comp3253_6_c0_seq3_m.1041  | Heterogeneous nuclear ribonucleoprotein Q [Morus notabilis] toIB  | 90.479 | 19.33  | 10.4 | 8  | 8  | 8  | 0.994 | 1.047 | 0.999 | 0.953 | 0.95  | 1.022 | 0.962 | 2.52E-01 |
| cds.Camellia_sinensis.comp3253_7_c0_seq1_m.2620  | protein-like protein [Arabidopsis thaliana] toIB                  | 73.827 | 107.67 | 25.8 | 13 | 18 | 11 | 0.93  | 0.914 | 0.902 | 1.133 | 1.074 | 1.06  | 1.19  | 1.46E-03 |
| cds.Camellia_sinensis.comp3253_7_c0_seq3_m.13950 | protein-like protein [Arabidopsis thaliana] toIB                  | 77.657 | 55.919 | 22.6 | 12 | 18 | 10 | 0.902 | 0.933 | 0.928 | 1.114 | 1.1   | 1.066 | 1.187 | 5.18E-04 |
| PREDICTED:                                       |                                                                   |        |        |      |    |    |    |       |       |       |       |       |       |       |          |
| cds.Camellia_sinensis.comp3253_7_c0_seq5_m.16986 | topless-related protein 1 isoform X1 [Vigna radiata var. radiata] | 62.321 | 20.338 | 15   | 8  | 11 | 4  | 0.965 | 0.974 | 1.044 | 0.983 | 0.957 | 1.089 | 1.015 | 7.73E-01 |

|                                                  |                                                                                                       |        |        |      |    |    |    |       |       |       |       |       |       |       |          |
|--------------------------------------------------|-------------------------------------------------------------------------------------------------------|--------|--------|------|----|----|----|-------|-------|-------|-------|-------|-------|-------|----------|
| cds.Camellia_sinensis.comp3253_8_c0_seq1_m.33174 | PREDICTED: probable 2-oxoglutarate-dependent dioxygenase<br>At3g49630 isoform X1<br>[Theobroma cacao] | 37.605 | 3.4332 | 10.4 | 3  | 3  | 3  | 0.984 | 0.909 | 0.962 | 1.131 | 1.029 | 1.013 | 1.111 | 6.56E-02 |
| cds.Camellia_sinensis.comp3254_2_c0_seq2_m.8482  | PREDICTED: vacuolar protein sorting-associated protein 51 homolog<br>[Vitis vinifera]                 | 89.96  | 10.538 | 4    | 3  | 3  | 3  |       |       |       |       |       |       |       |          |
| cds.Camellia_sinensis.comp3254_6_c0_seq1_m.9615  | PREDICTED: heat shock 70 kDa protein, mitochondrial-like<br>[Sesamum indicum]                         | 72.905 | 306.64 | 41.2 | 29 | 84 | 23 | 0.993 | 0.97  | 0.969 | 1.025 | 1.015 | 1.017 | 1.043 | 8.04E-03 |





|                                                  |                                                                                              |        |        |      |   |    |   |       |       |       |       |       |       |       |          |
|--------------------------------------------------|----------------------------------------------------------------------------------------------|--------|--------|------|---|----|---|-------|-------|-------|-------|-------|-------|-------|----------|
|                                                  | PREDICT<br>ED:<br>probable<br>bifunctional                                                   |        |        |      |   |    |   |       |       |       |       |       |       |       |          |
| cds.Camellia_sinensis.comp3255_7_c2_seq6_m.32119 | methylthioribulose-1-phosphate dehydratase/enolase-phosphatase E1<br>[Nicotiana attenuata]   | 45.532 | 33.579 | 19.6 | 9 | 12 | 9 | 0.991 | 0.994 | 0.989 | 1.084 | 0.983 | 1.027 | 1.04  | 3.05E-01 |
|                                                  | PREDICT<br>ED: 30S<br>ribosomal<br>protein S1<br>isoform<br>X1<br>[Theobroma cacao]<br>39S   |        |        |      |   |    |   |       |       |       |       |       |       |       |          |
| cds.Camellia_sinensis.comp3255_9_c0_seq1_m.23940 | ribosomal protein S1 isoform X1<br>[Theobroma cacao]<br>39S                                  | 43.965 | 7.4792 | 5.8  | 2 | 4  | 2 | 0.951 | 0.99  | 1.079 | 0.985 | 1.059 | 0.958 | 0.994 | 9.14E-01 |
|                                                  | PREDICT<br>ED:<br>chaperone<br>protein<br>dnaJ<br>GFA2,<br>mitochondrial<br>[Vitis vinifera] |        |        |      |   |    |   |       |       |       |       |       |       |       |          |
| cds.Camellia_sinensis.comp3256_1_c0_seq9_m.47671 | ribosomal protein L53/MRP-L53<br>[Medicago truncatula]                                       | 18.602 | -2     | 6.7  | 1 | 1  | 1 |       |       |       |       |       |       |       |          |
|                                                  | PREDICT<br>ED:<br>chaperone<br>protein<br>dnaJ<br>GFA2,<br>mitochondrial<br>[Vitis vinifera] |        |        |      |   |    |   |       |       |       |       |       |       |       |          |
| cds.Camellia_sinensis.comp3256_5_c0_seq1_m.19595 | chaperone protein dnaJ GFA2,<br>mitochondrial [Vitis vinifera]                               | 44.78  | 3.3611 | 4.9  | 2 | 2  | 2 | 0.988 | 0.973 | 0.894 | 1.045 | 1.031 | 1.088 | 1.108 | 4.19E-02 |

|                                                  |                                                                                 |        |        |      |    |    |    |       |       |       |       |       |       |       |          |
|--------------------------------------------------|---------------------------------------------------------------------------------|--------|--------|------|----|----|----|-------|-------|-------|-------|-------|-------|-------|----------|
| cds.Camellia_sinensis.comp3256_6_c0_seq2_m.24088 | PREDICT<br>ED:<br>ERBB-3<br>BINDING<br>PROTEIN<br>1<br>[Theobroma cacao]        | 43.52  | 52.548 | 30.6 | 11 | 13 | 8  | 1.199 | 1.148 | 1.055 | 0.862 | 0.882 | 0.855 | 0.764 | 2.28E-03 |
| cds.Camellia_sinensis.comp3256_6_c0_seq3_m.24185 | PREDICT<br>ED: EBP1<br>isoform<br>X1<br>[Solanum tuberosum]                     | 19.199 | 12.455 | 29.7 | 5  | 6  | 2  | 1.039 | 1.412 | 0.889 | 0.911 | 0.806 | 0.914 | 0.788 | 1.94E-01 |
| cds.Camellia_sinensis.comp3256_7_c0_seq1_m.20559 | PREDICT<br>ED: casein<br>kinase I<br>isoform<br>delta-like<br>[Ziziphus jujuba] | 53.237 | 3.3561 | 5.5  | 3  | 4  | 3  | 0.998 | 1.074 | 1.095 | 0.936 | 0.901 | 0.964 | 0.884 | 2.35E-02 |
| cds.Camellia_sinensis.comp3257_5_c0_seq1_m.12281 | PREDICT<br>ED: 2-<br>isopropyl<br>malate<br>synthase A<br>[Vitis vinifera]      | 66.102 | 92.444 | 29.2 | 15 | 23 | 11 | 0.99  | 0.962 | 0.961 | 1.035 | 1.012 | 0.991 | 1.043 | 5.75E-02 |
| cds.Camellia_sinensis.comp3257_5_c0_seq3_m.14832 | PREDICT<br>ED: 2-<br>isopropyl<br>malate<br>synthase A<br>[Vitis vinifera]      | 65.888 | 6.956  | 15.3 | 9  | 11 | 5  | 0.923 | 1.057 | 0.958 | 1.022 | 1.02  | 1.041 | 1.049 | 2.91E-01 |

|                                                                 |                                                                                                   |        |        |      |    |    |    |       |       |       |       |       |       |       |          |
|-----------------------------------------------------------------|---------------------------------------------------------------------------------------------------|--------|--------|------|----|----|----|-------|-------|-------|-------|-------|-------|-------|----------|
|                                                                 | PREDICT<br>ED:<br>pentatricop<br>ptide<br>repeat-                                                 |        |        |      |    |    |    |       |       |       |       |       |       |       |          |
| cds.Camell<br>ia_sinensis<br>.comp3257<br>7_c0_seq1<br>_m.48543 | containing<br>protein<br>At4g3815<br>0-like<br>[Malus<br>domestica]                               | 22.736 | 8.6434 | 22.2 | 5  | 5  | 5  | 0.996 | 1.065 | 1.074 | 0.95  | 0.94  | 0.973 | 0.913 | 2.53E-02 |
|                                                                 | PREDICT<br>ED:<br>argininosu<br>ccinate<br>lyase,<br>chloroplast<br>ic [Vitis<br>vinifera]        |        |        |      |    |    |    |       |       |       |       |       |       |       |          |
| cds.Camell<br>ia_sinensis<br>.comp3257<br>7_c1_seq1<br>_m.18933 | vacuolar<br>protein<br>sorting-<br>associated<br>protein<br>26A<br>[Ziziphus<br>jujuba]           | 59.026 | 22.933 | 14.3 | 7  | 8  | 7  | 1.013 | 0.98  | 0.94  | 1.024 | 1.053 | 0.994 | 1.047 | 1.66E-01 |
|                                                                 | PREDICT<br>ED:<br>heat<br>shock<br>protein 90-<br>5,<br>chloroplast<br>ic<br>[Ziziphus<br>jujuba] |        |        |      |    |    |    |       |       |       |       |       |       |       |          |
| cds.Camell<br>ia_sinensis<br>.comp3258<br>1_c1_seq3<br>_m.881   | vacuolar<br>protein<br>sorting-<br>associated<br>protein<br>26A<br>[Ziziphus<br>jujuba]           | 25.996 | 27.362 | 13.1 | 3  | 3  | 2  | 0.913 | 0.948 | 1.042 | 1.026 | 1.048 | 1.049 | 1.076 | 1.36E-01 |
|                                                                 | PREDICT<br>ED:<br>heat<br>shock<br>protein 90-<br>5,<br>chloroplast<br>ic<br>[Ziziphus<br>jujuba] |        |        |      |    |    |    |       |       |       |       |       |       |       |          |
| cds.Camell<br>ia_sinensis<br>.comp3258<br>1_c1_seq3<br>_m.881   | vacuolar<br>protein<br>sorting-<br>associated<br>protein<br>26A<br>[Ziziphus<br>jujuba]           | 91.123 | 323.31 | 41.9 | 26 | 55 | 22 | 1.194 | 1.155 | 1.172 | 0.807 | 0.787 | 0.827 | 0.688 | 2.33E-05 |

|                                                                                                     |        |        |      |    |    |    |       |       |       |       |       |       |       |          |
|-----------------------------------------------------------------------------------------------------|--------|--------|------|----|----|----|-------|-------|-------|-------|-------|-------|-------|----------|
| cds.Camellia_sinensis.comp3258                                                                      | 140.11 | 8.0215 | 4.3  | 5  | 5  | 5  | 0.959 | 1.078 | 0.976 | 1.009 | 0.967 | 1.023 | 0.995 | 9.33E-01 |
| 1_c1_seq5_m.2176                                                                                    |        |        |      |    |    |    |       |       |       |       |       |       |       |          |
| PREDICT ED: trafficking protein particle complex II-specific subunit 130 homolog [Vitis vinifera]   |        |        |      |    |    |    |       |       |       |       |       |       |       |          |
| cds.Camellia_sinensis.comp3258                                                                      | 49.565 | 3.2527 | 5.1  | 2  | 2  | 2  | 0.96  | 1.001 | 1.034 | 0.985 | 1.031 | 1.004 | 1.008 | 7.51E-01 |
| 1_c1_seq9_m.24298                                                                                   |        |        |      |    |    |    |       |       |       |       |       |       |       |          |
| PREDICT ED: probable protein phosphatase 2C 60 [Nelumbo nucifera]                                   |        |        |      |    |    |    |       |       |       |       |       |       |       |          |
| cds.Camellia_sinensis.comp3258                                                                      | 71.439 | 46.35  | 26.5 | 17 | 46 | 11 | 0.985 | 0.973 | 0.987 | 1.022 | 1.027 | 1.017 | 1.041 | 1.58E-03 |
| 5_c0_seq1_m.4306                                                                                    |        |        |      |    |    |    |       |       |       |       |       |       |       |          |
| PREDICT ED: 5-methyltetrahydropteroyltriglutamate--homocysteine methyltransferase [Ziziphus jujuba] |        |        |      |    |    |    |       |       |       |       |       |       |       |          |

|                                                    |                                                                                        |        |        |      |    |    |    |       |       |       |       |       |       |       |          |
|----------------------------------------------------|----------------------------------------------------------------------------------------|--------|--------|------|----|----|----|-------|-------|-------|-------|-------|-------|-------|----------|
|                                                    | PREDICT<br>ED:                                                                         |        |        |      |    |    |    |       |       |       |       |       |       |       |          |
| cds.Camellia_sinensis.comp3258_6_c0_seq1_m.27262   | triosephosphate isomerase, chloroplastic [Solanum pennellii]                           | 34.474 | 155.35 | 37.8 | 11 | 40 | 11 | 1.054 | 0.998 | 1.036 | 0.948 | 0.971 | 0.969 | 0.935 | 2.01E-02 |
|                                                    | PREDICT<br>ED: trans-resveratrol di-O-methyltransferase-like [Capsicum annuum]         |        |        |      |    |    |    |       |       |       |       |       |       |       |          |
| cds.Camellia_sinensis.comp3258_75_c0_seq1_m.5254_0 | triosephosphate isomerase, chloroplastic [Solanum pennellii]                           | 18.308 | 3.3564 | 6.7  | 1  | 1  | 1  | 0.827 | 0.94  | 0.8   | 1.074 | 1.207 | 1.205 | 1.358 | 8.00E-03 |
|                                                    | PREDICT<br>ED: anthranilate phosphoribosyltransferase, chloroplastic [Jatropha curcas] |        |        |      |    |    |    |       |       |       |       |       |       |       |          |
| cds.Camellia_sinensis.comp3259_1_c0_seq1_m.18528   | anthranilate phosphoribosyltransferase, chloroplastic [Jatropha curcas]                | 44.465 | 35.223 | 17   | 6  | 11 | 6  | 1.007 | 0.99  | 1.044 | 0.94  | 1.022 | 1.044 | 0.988 | 7.47E-01 |
|                                                    | PREDICT<br>ED: arogenate dehydratase 3, chloroplastic [Vitis vinifera]                 |        |        |      |    |    |    |       |       |       |       |       |       |       |          |
| cds.Camellia_sinensis.comp3259_2_c3_seq4_m.29222   | arogenate dehydratase 3, chloroplastic [Vitis vinifera]                                | 45.948 | 3.0291 | 4.3  | 2  | 2  | 1  | 1.331 | 1.137 | 1.271 | 0.663 | 0.842 | 0.675 | 0.583 | 3.78E-03 |

|                                                  |                                                                      |        |        |      |    |    |    |       |       |       |       |       |       |       |          |
|--------------------------------------------------|----------------------------------------------------------------------|--------|--------|------|----|----|----|-------|-------|-------|-------|-------|-------|-------|----------|
|                                                  | PREDICT<br>ED:                                                       |        |        |      |    |    |    |       |       |       |       |       |       |       |          |
| cds.Camellia_sinensis.comp3259_4_c0_seq1_m.2005  | translocase of chloroplast 159, chloroplastic [Nicotiana attenuata]  | 145.19 | 169.24 | 17.4 | 19 | 26 | 19 | 1.093 | 1.091 | 1.089 | 0.9   | 0.863 | 0.894 | 0.812 | 3.90E-03 |
|                                                  | PREDICT<br>ED:                                                       |        |        |      |    |    |    |       |       |       |       |       |       |       |          |
| cds.Camellia_sinensis.comp3259_5_c0_seq1_m.5552  | tubulin--tyrosine ligase-like protein 12 isoform X2 [Vitis vinifera] | 102.33 | 1.3778 | 0.9  | 1  | 1  | 1  | 1.037 | 0.888 | 1.004 | 0.848 | 1.055 | 1.167 | 1.048 | 7.20E-01 |
|                                                  | PREDICT<br>ED: CLIP-associated                                       |        |        |      |    |    |    |       |       |       |       |       |       |       |          |
| cds.Camellia_sinensis.comp3259_6_c0_seq2_m.1710  | protein isoform X1 [Vitis vinifera]                                  | 161.78 | 3.2754 | 1.6  | 2  | 2  | 2  | 0.835 | 1.039 | 1.221 | 1.007 | 1.037 | 0.888 | 0.947 | 7.30E-01 |
|                                                  | PREDICT<br>ED: nifU-like                                             |        |        |      |    |    |    |       |       |       |       |       |       |       |          |
| cds.Camellia_sinensis.comp3259_8_c0_seq1_m.32571 | protein 4, mitochondrial [Citrus sinensis]                           | 20.076 | 20.747 | 38.9 | 6  | 9  | 6  | 0.963 | 1.038 | 0.964 | 0.988 | 1.013 | 0.964 | 1     | 9.89E-01 |

|                                                  |                                                                     |        |        |      |    |    |    |       |       |       |       |       |       |       |          |
|--------------------------------------------------|---------------------------------------------------------------------|--------|--------|------|----|----|----|-------|-------|-------|-------|-------|-------|-------|----------|
|                                                  | PREDICT<br>ED:                                                      |        |        |      |    |    |    |       |       |       |       |       |       |       |          |
| cds.Camellia_sinensis.comp3259_9_c0_seq1_m.31879 | gamma carbonic anhydrase 1, mitochondrial [Ziziphus jujuba]         | 29.459 | 79.989 | 38.4 | 10 | 17 | 4  | 1.018 | 1.026 | 0.977 | 0.992 | 0.976 | 0.986 | 0.978 | 2.35E-01 |
|                                                  | PREDICT<br>ED:                                                      |        |        |      |    |    |    |       |       |       |       |       |       |       |          |
| cds.Camellia_sinensis.comp3259_9_c0_seq3_m.34004 | gamma carbonic anhydrase 1, mitochondrial-like [Gossypium hirsutum] | 29.493 | 23.55  | 32.8 | 9  | 16 | 3  | 0.987 | 0.959 | 0.931 | 1.048 | 1.042 | 1.008 | 1.077 | 2.34E-02 |
|                                                  | PREDICT<br>ED: ER                                                   |        |        |      |    |    |    |       |       |       |       |       |       |       |          |
| cds.Camellia_sinensis.comp3260_4_c0_seq2_m.38380 | membrane protein complex subunit 4-like [Gossypium raimondii]       | 19.751 | 3.5857 | 17.8 | 3  | 4  | 3  | 0.998 | 0.908 | 1.104 | 0.93  | 1.013 | 1.053 | 0.995 | 9.69E-01 |
|                                                  | PREDICT<br>ED:                                                      |        |        |      |    |    |    |       |       |       |       |       |       |       |          |
| cds.Camellia_sinensis.comp3260_8_c0_seq2_m.39213 | proteasome subunit alpha type-7 [Vitis vinifera]                    | 27.457 | 64.161 | 48.8 | 13 | 26 | 13 | 1.003 | 0.967 | 0.963 | 1.011 | 1.025 | 1.043 | 1.05  | 3.67E-02 |

|                                                  |                                                                               |        |        |      |    |    |    |       |       |       |       |       |       |       |          |
|--------------------------------------------------|-------------------------------------------------------------------------------|--------|--------|------|----|----|----|-------|-------|-------|-------|-------|-------|-------|----------|
| cds.Camellia_sinensis.comp3261_1_c0_seq2_m.7606  | PREDICTED: 26S proteasome non-ATPase regulatory subunit 8 homolog A [Sesamum] | 26.899 | 75.183 | 45.3 | 9  | 14 | 9  | 1.012 | 0.992 | 0.996 | 0.954 | 0.984 | 1.015 | 0.984 | 4.43E-01 |
| cds.Camellia_sinensis.comp3261_1_c0_seq5_m.9822  | PREDICTED: eukaryotic translation initiation factor 5B isoform X2 [Prunus]    | 49.752 | 2.1091 | 4.1  | 1  | 1  | 1  | 0.883 | 0.94  | 1.151 | 1.074 | 1.077 | 0.91  | 1.029 | 7.57E-01 |
| cds.Camellia_sinensis.comp3261_2_c0_seq1_m.44258 | PREDICTED: small ubiquitin-related modifier 1 [Eucalyptus grandis]            | 11.644 | 63.404 | 33.3 | 4  | 8  | 1  | 1.095 | 1.016 | 1.17  | 0.962 | 0.784 | 0.954 | 0.823 | 6.51E-02 |
| cds.Camellia_sinensis.comp3261_2_c1_seq1_m.15867 | PREDICTED: transaldolase family protein [Populus trichocarpa]                 | 48.347 | 172.31 | 32.3 | 13 | 33 | 13 | 1.061 | 1.018 | 1.054 | 0.946 | 0.961 | 0.966 | 0.917 | 3.76E-03 |





| PREDICTED:                                                                  |                                                                    |        |        |      |    |     |    |       |       |       |       |       |       |       |          |
|-----------------------------------------------------------------------------|--------------------------------------------------------------------|--------|--------|------|----|-----|----|-------|-------|-------|-------|-------|-------|-------|----------|
| probable ADP-ribosylation factor GTPase-activating protein AGD14 isoform X2 |                                                                    |        |        |      |    |     |    |       |       |       |       |       |       |       |          |
| [Theobroma cacao]                                                           |                                                                    |        |        |      |    |     |    |       |       |       |       |       |       |       |          |
| cds.Camellia_sinensis.comp3262_4_c0_seq1_m.4750                             | ribulose-1 (chloroplast) [Carpinus putoensis] ATP synthase         | 34.441 | 2.1163 | 2.9  | 1  | 1   | 1  | 1.061 | 1.021 | 1.007 | 1.042 | 0.96  | 0.91  | 0.943 | 2.28E-01 |
| cds.Camellia_sinensis.comp3262_5_c0_seq1_m.1156                             | CF1 beta subunit (chloroplast) [Camellia leptophylla] ATP synthase | 53.444 | 323.31 | 55.6 | 31 | 631 | 31 | 1     | 1.022 | 1.005 | 0.992 | 0.971 | 0.971 | 0.969 | 3.24E-02 |
| cds.Camellia_sinensis.comp3262_5_c0_seq1_m.1157                             | CF1 epsilon subunit (chloroplast) [Camellia leptophylla]           | 49.355 | 323.31 | 72.1 | 22 | 234 | 21 | 1.005 | 1.007 | 0.995 | 1.001 | 1.012 | 0.988 | 0.998 | 8.09E-01 |
| cds.Camellia_sinensis.comp3262_5_c0_seq1_m.1158                             | CF1 epsilon subunit (chloroplast) [Camellia leptophylla]           | 14.685 | 149.91 | 66.9 | 7  | 28  | 7  | 0.992 | 0.98  | 0.977 | 1.056 | 0.995 | 1.015 | 1.04  | 9.97E-02 |

|                                                  |                                                                 |        |        |      |    |    |    |       |       |       |       |       |       |       |          |
|--------------------------------------------------|-----------------------------------------------------------------|--------|--------|------|----|----|----|-------|-------|-------|-------|-------|-------|-------|----------|
| cds.Camellia_sinensis.comp3262_6_c0_seq3_m.34857 | Thioredoxin-like protein [Morus notabilis] TATA BINDING protein | 28.957 | 87.929 | 42.5 | 11 | 20 | 11 | 1.013 | 1.035 | 0.985 | 0.992 | 0.988 | 0.985 | 0.978 | 2.61E-01 |
| cds.Camellia_sinensis.comp3262_6_c2_seq1_m.40398 | ASSOCIATED FACTOR 21KDA SUBUNIT [Populus trichocarpa]           | 23.413 | 1.9244 | 4.8  | 1  | 2  | 1  | 1.021 | 0.954 | 1.054 | 0.961 | 0.98  | 1.034 | 0.982 | 6.56E-01 |
| cds.Camellia_sinensis.comp3262_6_c3_seq1_m.19050 | FRIGIDA-like protein 4a [Nicotiana tabacum]                     | 63.348 | 24.606 | 14.5 | 8  | 13 | 8  | 1.011 | 1.075 | 1.095 | 0.942 | 0.92  | 0.906 | 0.87  | 6.52E-03 |
| cds.Camellia_sinensis.comp3262_8_c0_seq6_m.1529  | chromatin modification-related protein eaf-1 [Vitis vinifera]   | 102.17 | 17.366 | 9.1  | 8  | 8  | 8  | 1.033 | 1.073 | 1.076 | 0.932 | 0.897 | 0.962 | 0.877 | 5.52E-03 |
| cds.Camellia_sinensis.comp3262_9_c0_seq1_m.13549 | T-complex protein 1 subunit alpha [Jatropha curcas]             | 41.847 | 70.735 | 33.3 | 11 | 18 | 11 | 0.955 | 0.977 | 0.935 | 1.051 | 1.054 | 1.035 | 1.095 | 2.80E-03 |

|                                                  |                                                                     |        |        |      |   |   |   |       |       |       |       |       |       |       |          |
|--------------------------------------------------|---------------------------------------------------------------------|--------|--------|------|---|---|---|-------|-------|-------|-------|-------|-------|-------|----------|
| cds.Camellia_sinensis.comp3262.9_c0_seq1_m.13550 | PREDICT<br>ED: T-complex protein 1 subunit alpha [Jatropha curcas]  | 17.331 | 9.7863 | 16.2 | 3 | 6 | 3 | 0.938 | 1.002 | 1.025 | 1.035 | 1.017 | 1.043 | 1.044 | 1.90E-01 |
| cds.Camellia_sinensis.comp3263.2_c0_seq1_m.2349  | SH3 domain protein [Medicago truncatula]                            | 116.34 | 3.2732 | 2.1  | 3 | 3 | 3 | 1.072 | 1.098 | 1.151 | 0.881 | 0.887 | 0.889 | 0.8   | 8.84E-03 |
| cds.Camellia_sinensis.comp3263.3_c0_seq1_m.37141 | PREDICT<br>ED: secoisolariciresinol dehydrogenase [Malus domestica] | 32.062 | 11.239 | 15.1 | 5 | 7 | 5 | 0.965 | 0.962 | 0.996 | 1.059 | 1.015 | 1.017 | 1.057 | 3.46E-02 |
| cds.Camellia_sinensis.comp3263.5_c0_seq1_m.17640 | PREDICT<br>ED: phospholipase SGR2 isoform X4 [Ziziphus jujuba]      | 53.979 | 12.173 | 8.2  | 3 | 3 | 3 | 0.926 | 1.056 | 1.078 | 0.999 | 1.007 | 0.938 | 0.962 | 5.22E-01 |
| cds.Camellia_sinensis.comp3263.7_c0_seq1_m.12436 | PREDICT<br>ED: protein MLP1 isoform X2 [Vitis vinifera]             | 76.674 | 11.268 | 7.2  | 5 | 6 | 4 | 1.065 | 1.144 | 1.081 | 0.882 | 0.892 | 0.929 | 0.822 | 1.88E-03 |



|                                                  |                                                                                                   |        |        |      |   |    |   |       |       |       |       |       |       |       |          |
|--------------------------------------------------|---------------------------------------------------------------------------------------------------|--------|--------|------|---|----|---|-------|-------|-------|-------|-------|-------|-------|----------|
| cds.Camellia_sinensis.comp3264.5_c0_seq1_m.1618  | PREDICT<br>ED: enoyl-<br>[acyl-carrier-protein] reductase [NADH], chloroplast ic [Vitis vinifera] | 41.544 | 94.606 | 27   | 9 | 25 | 3 | 0.993 | 0.945 | 0.972 | 1.035 | 1.052 | 1.015 | 1.066 | 2.24E-02 |
| cds.Camellia_sinensis.comp3265.4_c0_seq1_m.12782 | PREDICT<br>ED:<br>peptidyl-prolyl cis-trans isomerase PASTICCI NO1 isoform X1 [Vitis vinifera]    | 70.005 | 10.659 | 6.1  | 3 | 3  | 3 | 1.04  | 1.116 | 1.044 | 0.911 | 0.851 | 0.864 | 0.821 | 3.04E-03 |
| cds.Camellia_sinensis.comp3265.9_c0_seq6_m.10945 | PREDICT<br>ED:<br>probable glutamate carboxypeptidase 2 isoform X1 [Sesamum indicum]              | 39.017 | 27.07  | 19   | 6 | 9  | 6 | 0.946 | 0.987 | 0.949 | 1.033 | 1.045 | 1.092 | 1.1   | 1.19E-02 |
| cds.Camellia_sinensis.comp3265.9_c0_seq6_m.10946 | PREDICT<br>ED:<br>probable glutamate carboxypeptidase 2 [Vitis vinifera]                          | 22.959 | 16.231 | 18.2 | 4 | 5  | 4 | 0.942 | 0.956 | 0.966 | 1.069 | 1.068 | 1.029 | 1.105 | 2.32E-03 |







|                                                  |                                                                                                                                                                          |        |        |      |   |    |   |       |       |       |       |       |       |       |          |
|--------------------------------------------------|--------------------------------------------------------------------------------------------------------------------------------------------------------------------------|--------|--------|------|---|----|---|-------|-------|-------|-------|-------|-------|-------|----------|
| cds.Camellia_sinensis.comp3269_1_c0_seq2_m.17320 | PREDICTED: lipoamide acyltransferase component of branched-chain alpha-keto acid dehydrogenase complex, mitochondrial [Vitis vinifera] alpha/beta-hydrolases superfamily | 62.031 | 24.979 | 5.9  | 2 | 2  | 2 | 0.976 | 0.967 | 1.171 | 0.967 | 0.964 | 0.962 | 0.929 | 3.80E-01 |
| cds.Camellia_sinensis.comp3269_4_c0_seq3_m.27655 | protein precursor [Solanum lycopersicum]                                                                                                                                 | 22.834 | 1.7437 | 4    | 1 | 2  | 1 | 1.019 | 1.017 | 1.02  | 0.972 | 0.99  | 0.984 | 0.964 | 2.56E-03 |
| cds.Camellia_sinensis.comp3269_6_c0_seq3_m.41222 | PREDICTED: aladin isoform X1 [Vitis vinifera]                                                                                                                            | 27.84  | 5.1003 | 14.9 | 4 | 4  | 4 | 0.992 | 0.924 | 0.958 | 1.055 | 1.023 | 1.086 | 1.101 | 2.29E-02 |
| cds.Camellia_sinensis.comp3269_9_c0_seq1_m.25218 | PREDICTED: 26S proteasome non-ATPase regulatory subunit 13 homolog A [Vitis vinifera]                                                                                    | 47.41  | 46.294 | 22.8 | 9 | 16 | 9 | 0.961 | 0.964 | 0.993 | 1.031 | 1.033 | 0.99  | 1.047 | 5.88E-02 |

|                                |                                                             |        |        |      |   |    |   |       |       |       |       |       |       |       |          |
|--------------------------------|-------------------------------------------------------------|--------|--------|------|---|----|---|-------|-------|-------|-------|-------|-------|-------|----------|
|                                | PREDICT                                                     |        |        |      |   |    |   |       |       |       |       |       |       |       |          |
|                                | ED:                                                         |        |        |      |   |    |   |       |       |       |       |       |       |       |          |
|                                | ATPase                                                      |        |        |      |   |    |   |       |       |       |       |       |       |       |          |
| cds.Camellia_sinensis          | family AAA domain-containing protein 3-B [Nelumbo nucifera] |        |        |      |   |    |   |       |       |       |       |       |       |       |          |
| .comp3270_1_c0_seq1_m.13827    |                                                             | 74.452 | 28.859 | 11.9 | 9 | 12 | 8 | 0.923 | 0.975 | 0.939 | 1.035 | 1.042 | 1.027 | 1.094 | 5.72E-03 |
|                                | PREDICT                                                     |        |        |      |   |    |   |       |       |       |       |       |       |       |          |
|                                | ED:                                                         |        |        |      |   |    |   |       |       |       |       |       |       |       |          |
|                                | profilin-2 [Gossypium hirsutum]                             |        |        |      |   |    |   |       |       |       |       |       |       |       |          |
| cds.Camellia_sinensis          |                                                             |        |        |      |   |    |   |       |       |       |       |       |       |       |          |
| .comp3270_2_c0_seq1_4_m.3897_3 |                                                             | 14.14  | 34.761 | 38.9 | 5 | 19 | 4 | 1.041 | 0.993 | 0.974 | 0.99  | 1.006 | 1.022 | 1.003 | 8.76E-01 |
|                                | PREDICT                                                     |        |        |      |   |    |   |       |       |       |       |       |       |       |          |
|                                | ED:                                                         |        |        |      |   |    |   |       |       |       |       |       |       |       |          |
|                                | probable diphthine methyl ester synthase [Vitis vinifera]   |        |        |      |   |    |   |       |       |       |       |       |       |       |          |
| cds.Camellia_sinensis          |                                                             |        |        |      |   |    |   |       |       |       |       |       |       |       |          |
| .comp3270_7_c0_seq1_m.33071    |                                                             | 30.465 | 6.7062 | 6.9  | 2 | 2  | 2 | 0.917 | 0.959 | 0.997 | 1.095 | 1.017 | 1.045 | 1.099 | 4.35E-02 |
|                                | PREDICT                                                     |        |        |      |   |    |   |       |       |       |       |       |       |       |          |
|                                | ED: (+)-neomenthol 1 dehydrogenase [Vitis vinifera]         |        |        |      |   |    |   |       |       |       |       |       |       |       |          |
| cds.Camellia_sinensis          |                                                             |        |        |      |   |    |   |       |       |       |       |       |       |       |          |
| .comp3270_9_c0_seq2_m.50782    |                                                             | 17.282 | 59.453 | 40.4 | 7 | 17 | 7 | 0.983 | 1.005 | 0.997 | 1.013 | 1.008 | 1.024 | 1.02  | 6.68E-02 |

|                                |                   |                                                                                                             |        |        |      |    |    |    |       |       |       |       |       |       |       |          |
|--------------------------------|-------------------|-------------------------------------------------------------------------------------------------------------|--------|--------|------|----|----|----|-------|-------|-------|-------|-------|-------|-------|----------|
| cds.Camellia_sinensis.comp3270 | 9_c3_seq1_m.49004 | PREDICT<br>ED: (+)-neomenthoniol dehydrogenase<br>[Theobroma cacao]                                         | 17.639 | 47.85  | 48.1 | 7  | 15 | 7  | 0.997 | 0.979 | 1     | 1.011 | 0.995 | 0.985 | 1.005 | 6.45E-01 |
| cds.Camellia_sinensis.comp3271 | 0_c0_seq5_m.19068 | PREDICT<br>ED: endoplasmic reticulum-Golgi intermediate compartment protein 3 isoform X1<br>[Juglans regia] | 40.331 | 1.9355 | 2.3  | 1  | 1  | 1  | 1.016 | 0.985 | 1.082 | 0.972 | 1.012 | 0.936 | 0.947 | 2.04E-01 |
| cds.Camellia_sinensis.comp3271 | 6_c0_seq1_m.13905 | PREDICT<br>ED: phosphoglucosyltransferase, chloroplastic-like<br>[Populus]                                  | 68.529 | 116.97 | 29   | 15 | 37 | 15 | 0.968 | 0.976 | 0.97  | 1.055 | 1.05  | 1.022 | 1.073 | 2.30E-03 |
| cds.Camellia_sinensis.comp3271 | 6_c0_seq2_m.17812 | PREDICT<br>ED: phosphoglucosyltransferase, cytoplasmic<br>[Daucus carota subsp.]                            | 63.336 | 295.75 | 42.7 | 23 | 62 | 12 | 0.957 | 0.956 | 0.966 | 1.033 | 1.061 | 1.042 | 1.089 | 5.61E-04 |

|                                                    |                                                                         |        |        |      |    |    |    |       |       |       |       |       |       |       |          |
|----------------------------------------------------|-------------------------------------------------------------------------|--------|--------|------|----|----|----|-------|-------|-------|-------|-------|-------|-------|----------|
|                                                    | PREDICT                                                                 |        |        |      |    |    |    |       |       |       |       |       |       |       |          |
|                                                    | ED:                                                                     |        |        |      |    |    |    |       |       |       |       |       |       |       |          |
| cds.Camellia_sinensis.comp3271_6_c0_seq3_m.17919   | phosphoglucosyl transferase 1 cytoplasmic [Daucus carota subsp. carota] | 63.559 | 70.773 | 34.3 | 18 | 50 | 7  | 1.038 | 1.026 | 1.01  | 0.945 | 0.993 | 0.969 | 0.946 | 2.67E-02 |
|                                                    | PREDICT                                                                 |        |        |      |    |    |    |       |       |       |       |       |       |       |          |
|                                                    | ED:                                                                     |        |        |      |    |    |    |       |       |       |       |       |       |       |          |
| cds.Camellia_sinensis.comp3271_6_c3_seq1_m.24652   | desiccation-related protein 1 [Ziziphus caribaea]                       | 34.969 | 57.56  | 30.8 | 11 | 18 | 11 | 1.162 | 1.127 | 1.143 | 0.854 | 0.848 | 0.842 | 0.741 | 3.33E-06 |
|                                                    | PREDICT                                                                 |        |        |      |    |    |    |       |       |       |       |       |       |       |          |
|                                                    | ED:                                                                     |        |        |      |    |    |    |       |       |       |       |       |       |       |          |
| cds.Camellia_sinensis.comp3271_7_c0_seq1_m.34599   | glutathione S-transferase U17-like [Malus domestica]                    | 25.892 | 29.821 | 32.2 | 7  | 15 | 7  | 1.337 | 1.307 | 1.346 | 0.645 | 0.642 | 0.635 | 0.482 | 1.07E-07 |
|                                                    | PREDICT                                                                 |        |        |      |    |    |    |       |       |       |       |       |       |       |          |
|                                                    | ED:                                                                     |        |        |      |    |    |    |       |       |       |       |       |       |       |          |
| cds.Camellia_sinensis.comp3272_1_c2_seq1_7_m.22610 | multiple inositol polyphosphate 1-phosphatase [Vitis vinifera]          | 57.393 | 5.2379 | 8.9  | 5  | 6  | 2  | 1.016 | 0.9   | 0.964 | 1.147 | 0.985 | 1.011 | 1.091 | 2.15E-01 |



|                       |                                                                          |        |        |      |   |    |   |       |       |       |       |       |       |       |          |
|-----------------------|--------------------------------------------------------------------------|--------|--------|------|---|----|---|-------|-------|-------|-------|-------|-------|-------|----------|
| PREDICT               |                                                                          |        |        |      |   |    |   |       |       |       |       |       |       |       |          |
| ED:                   |                                                                          |        |        |      |   |    |   |       |       |       |       |       |       |       |          |
| cds.Camellia_sinensis | ADP,ATP carrier protein 1, mitochondrial, partial [Cucumis melo]         | 15.292 | 28.758 | 28.9 | 4 | 30 | 2 | 1.006 | 0.999 | 0.985 | 1.042 | 0.998 | 0.966 | 1.005 | 8.41E-01 |
| PREDICT               |                                                                          |        |        |      |   |    |   |       |       |       |       |       |       |       |          |
| ED:                   |                                                                          |        |        |      |   |    |   |       |       |       |       |       |       |       |          |
| cds.Camellia_sinensis | thiosulfate sulfurtransferase 16, chloroplastic-like [Nicotiana tabacum] | 20.187 | 20.809 | 13.9 | 2 | 4  | 2 | 0.708 | 0.694 | 0.783 | 1.411 | 1.215 | 1.441 | 1.861 | 6.96E-04 |
| PREDICT               |                                                                          |        |        |      |   |    |   |       |       |       |       |       |       |       |          |
| ED:                   |                                                                          |        |        |      |   |    |   |       |       |       |       |       |       |       |          |
| cds.Camellia_sinensis | nucleolin 2 isoform X2 [Populus euphratica]                              | 43.038 | 2.5127 | 4.2  | 2 | 2  | 2 |       |       |       |       |       |       |       |          |
| PREDICT               |                                                                          |        |        |      |   |    |   |       |       |       |       |       |       |       |          |
| ED:                   |                                                                          |        |        |      |   |    |   |       |       |       |       |       |       |       |          |
| cds.Camellia_sinensis | nucleolin 2 isoform X5 [Theobroma cacao]                                 | 37.571 | 11.486 | 14.8 | 5 | 5  | 5 | 1.064 | 1.012 | 1.042 | 0.982 | 0.947 | 0.949 | 0.923 | 1.28E-02 |
| PREDICT               |                                                                          |        |        |      |   |    |   |       |       |       |       |       |       |       |          |
| ED:                   |                                                                          |        |        |      |   |    |   |       |       |       |       |       |       |       |          |
| cds.Camellia_sinensis | serine/threonine-protein kinase rio1 [Theobroma cacao]                   | 55.265 | -2     | 1.8  | 1 | 1  | 1 | 1.053 | 1.091 | 1.133 | 0.923 | 0.905 | 0.88  | 0.826 | 1.66E-03 |

|                                                  |                                                                                                                           |        |        |      |    |    |    |       |       |       |       |       |       |       |          |
|--------------------------------------------------|---------------------------------------------------------------------------------------------------------------------------|--------|--------|------|----|----|----|-------|-------|-------|-------|-------|-------|-------|----------|
| cds.Camellia_sinensis.comp3273_6_c2_seq9_m.26887 | PREDICTED: ATP-dependent Clp protease proteolytic subunit-related protein 3, chloroplastic [Daucus carota subsp. sativus] | 36.507 | 21.394 | 18.6 | 6  | 11 | 6  | 0.995 | 1.011 | 1.016 | 0.987 | 0.968 | 0.965 | 0.966 | 2.21E-02 |
| cds.Camellia_sinensis.comp3273_7_c1_seq2_m.36809 | PREDICTED: putative pterin-4-alpha-carbinolamine dehydratase [Theobroma cacao]                                            | 21.022 | 2.0391 | 8.6  | 2  | 2  | 2  | 0.984 | 0.976 | 1.038 | 0.926 | 1.052 | 1.031 | 1.004 | 9.58E-01 |
| cds.Camellia_sinensis.comp3273_9_c0_seq3_m.16599 | PREDICTED: protein disulfide-isomerase [Nelumbo nucifera]                                                                 | 59.466 | 136.03 | 39.8 | 21 | 52 | 18 | 1.023 | 0.994 | 1.017 | 0.972 | 0.985 | 0.993 | 0.972 | 5.97E-02 |
| cds.Camellia_sinensis.comp3273_9_c0_seq5_m.46232 | PREDICTED: protein disulfide-isomerase [Nelumbo nucifera]                                                                 | 11.563 | 58.865 | 46.1 | 5  | 10 | 4  | 0.939 | 0.987 | 0.981 | 1.022 | 1.079 | 1.039 | 1.08  | 2.65E-02 |

|                                                  |                                                                                           |        |        |      |    |    |   |       |       |       |       |       |       |       |          |
|--------------------------------------------------|-------------------------------------------------------------------------------------------|--------|--------|------|----|----|---|-------|-------|-------|-------|-------|-------|-------|----------|
| cds.Camellia_sinensis.comp3274_2_c1_seq1_m.45933 | PREDICT<br>ED: MLP-like protein 329 [Malus domestica]                                     | 15.84  | 14.108 | 29.2 | 6  | 19 | 6 | 1.096 | 1.026 | 1.02  | 0.923 | 0.96  | 0.956 | 0.904 | 1.82E-02 |
| cds.Camellia_sinensis.comp3274_3_c0_seq1_m.18298 | PREDICT<br>ED: pheophorbide a oxygenase, chloroplastic [Citrus sinensis]                  | 64.511 | 31.615 | 17   | 10 | 16 | 9 | 0.959 | 1.004 | 0.983 | 1.025 | 1.03  | 1.004 | 1.038 | 7.03E-02 |
| cds.Camellia_sinensis.comp3274_6_c0_seq4_m.1832  | PREDICT<br>ED: cell division cycle and apoptosis regulator protein 1 [Citrus sinensis]    | 91.223 | 21.677 | 3.3  | 2  | 2  | 2 | 1.115 | 1.082 | 0.999 | 0.971 | 0.852 | 0.963 | 0.872 | 6.13E-02 |
| cds.Camellia_sinensis.comp3274_6_c0_seq4_m.1833  | PREDICT<br>ED: cell division cycle and apoptosis regulator protein 1-like [Juglans regia] | 73.066 | 17.17  | 6.1  | 3  | 3  | 3 | 0.897 | 0.978 | 0.977 | 1.069 | 1.05  | 1.061 | 1.115 | 1.97E-02 |



|                                                  |                                                                                                               |        |        |      |    |    |    |       |       |       |       |       |       |       |          |
|--------------------------------------------------|---------------------------------------------------------------------------------------------------------------|--------|--------|------|----|----|----|-------|-------|-------|-------|-------|-------|-------|----------|
| cds.Camellia_sinensis.comp3275_0_c0_seq1_m.2788  | PREDICT<br>ED: heat shock 70 kDa protein 14-like<br>[Sesamum indicum]                                         | 93.302 | 139    | 33   | 29 | 58 | 19 | 1.054 | 1.044 | 1.031 | 0.947 | 0.968 | 0.976 | 0.924 | 2.00E-03 |
| cds.Camellia_sinensis.comp3275_0_c0_seq4_m.29864 | PREDICT<br>ED: heat shock 70 kDa protein 14-like<br>[Sesamum indicum]                                         | 39.488 | 36.472 | 29.4 | 11 | 23 | 6  | 1.041 | 1.012 | 1.026 | 1.021 | 0.958 | 0.935 | 0.946 | 1.13E-01 |
| cds.Camellia_sinensis.comp3275_9_c0_seq3_m.33575 | PREDICT<br>ED: erlin-2-B<br>[Juglans regia]                                                                   | 26.825 | 10.511 | 22.8 | 6  | 7  | 6  | 0.98  | 0.992 | 0.996 | 0.983 | 1.023 | 1.02  | 1.02  | 2.34E-01 |
| cds.Camellia_sinensis.comp3276_2_c0_seq1_m.10285 | PREDICT<br>ED: ABC transporter G family member 11<br>[Ricinus carboxyl-terminal peptidase, putative (DUF239)] | 79.525 | 7.4286 | 2.7  | 2  | 2  | 2  | 1.174 | 1.224 | 1.243 | 0.792 | 0.761 | 0.749 | 0.632 | 4.14E-05 |
| cds.Camellia_sinensis.comp3276_2_c0_seq5_m.23908 | [Arabidopsis thaliana]                                                                                        | 46.737 | 12.397 | 7.1  | 2  | 2  | 2  | 0.969 | 1.075 | 0.98  | 0.999 | 1.041 | 0.948 | 0.988 | 7.99E-01 |

|                                                  |                                                                                                                                                                                                                                                                                                                             |        |        |     |   |   |   |       |       |       |       |       |       |       |          |
|--------------------------------------------------|-----------------------------------------------------------------------------------------------------------------------------------------------------------------------------------------------------------------------------------------------------------------------------------------------------------------------------|--------|--------|-----|---|---|---|-------|-------|-------|-------|-------|-------|-------|----------|
| cds.Camellia_sinensis.comp3276_2_c1_seq3_m.42855 | polyketide cyclase/dehydrase and lipid transporter [Medicago truncatula] RAP release 2, galactose-binding-like domain protein, putative (DUF1997) [Arabidopsis thaliana] PREDICT ED: microtubule-associated protein 70-2 [Vitis vinifera] PREDICT ED: microtubule-associated protein 70-2-like isoform X1 [Jatropha curcas] | 20.26  | 3.243  | 9.5 | 2 | 5 | 2 | 1.011 | 1.035 | 1.009 | 1.045 | 0.944 | 0.964 | 0.967 | 3.38E-01 |
| cds.Camellia_sinensis.comp3276_5_c1_seq2_m.35449 | like domain protein, putative (DUF1997) [Arabidopsis thaliana] PREDICT ED: microtubule-associated protein 70-2 [Vitis vinifera] PREDICT ED: microtubule-associated protein 70-2-like isoform X1 [Jatropha curcas]                                                                                                           | 30.745 | 19.69  | 6.9 | 2 | 2 | 2 | 0.997 | 0.985 | 0.947 | 1.05  | 0.973 | 1.063 | 1.054 | 1.79E-01 |
| cds.Camellia_sinensis.comp3276_9_c0_seq1_m.42882 | microtubule-associated protein 70-2 [Vitis vinifera] PREDICT ED: microtubule-associated protein 70-2-like isoform X1 [Jatropha curcas]                                                                                                                                                                                      | 24.68  | 3.264  | 4.9 | 1 | 1 | 1 | 0.977 | 1.006 | 1.07  | 1     | 1.003 | 0.955 | 0.969 | 3.74E-01 |
| cds.Camellia_sinensis.comp3276_9_c1_seq2_m.20869 | microtubule-associated protein 70-2-like isoform X1 [Jatropha curcas]                                                                                                                                                                                                                                                       | 45.149 | 3.4536 | 6.7 | 2 | 2 | 2 | 1.013 | 0.982 | 1.004 | 1.019 | 1     | 0.992 | 1.004 | 7.58E-01 |



|                                                                 |                                                                                                                  |        |        |      |   |    |   |       |       |       |       |       |       |       |          |
|-----------------------------------------------------------------|------------------------------------------------------------------------------------------------------------------|--------|--------|------|---|----|---|-------|-------|-------|-------|-------|-------|-------|----------|
|                                                                 | PREDICT<br>ED: LOW<br>QUALITY<br>PROTEIN:<br>succinate<br>dehydroge                                              |        |        |      |   |    |   |       |       |       |       |       |       |       |          |
| cds.Camell<br>ia_sinensis<br>.comp3280<br>0_c0_seq3<br>_m.35099 | nase<br>[ubiquinon<br>e]<br>flavoprotei<br>n subunit<br>1,<br>mitochond<br>rial-<br>like[Sesam<br>um<br>indicum] | 28.478 | 7.2209 | 25.7 | 6 | 14 | 3 | 1.026 | 0.927 | 0.997 | 0.967 | 1.032 | 1.06  | 1.037 | 4.21E-01 |
|                                                                 | PREDICT<br>ED: LOW<br>QUALITY<br>PROTEIN:<br>succinate<br>dehydroge                                              |        |        |      |   |    |   |       |       |       |       |       |       |       |          |
| cds.Camell<br>ia_sinensis<br>.comp3280<br>0_c0_seq5<br>_m.39195 | nase<br>[ubiquinon<br>e]<br>flavoprotei<br>n subunit<br>1,<br>mitochond<br>rial-<br>like[Sesam<br>um<br>indicum] | 28.503 | 82.298 | 34   | 7 | 20 | 4 | 1.021 | 1.039 | 1.024 | 0.954 | 1.007 | 0.982 | 0.954 | 4.67E-02 |

|                                                  |                                                                                |        |        |      |    |    |    |       |       |       |       |       |       |       |          |
|--------------------------------------------------|--------------------------------------------------------------------------------|--------|--------|------|----|----|----|-------|-------|-------|-------|-------|-------|-------|----------|
| cds.Camellia_sinensis.comp3280_1_c0_seq3_m.30883 | PREDICT<br>ED: V-type proton ATPase subunit D<br>[Theobroma cacao]             | 29.117 | 57.583 | 48.7 | 14 | 21 | 14 | 0.955 | 0.986 | 0.972 | 1.06  | 1.05  | 1.033 | 1.079 | 3.10E-03 |
| cds.Camellia_sinensis.comp3280_2_c0_seq1_m.10798 | PREDICT<br>ED: endoglucanase 25-like<br>[Solanum tuberosum]                    | 68.121 | 1.4024 | 1.1  | 1  | 1  | 1  |       |       |       |       |       |       |       |          |
| cds.Camellia_sinensis.comp3280_6_c0_seq1_m.28386 | PREDICT<br>ED: beta-glucosidase BoGH3B<br>[Theobroma cacao]                    | 46.413 | 22.959 | 8.8  | 3  | 4  | 3  | 0.903 | 0.981 | 0.907 | 1.103 | 1.071 | 1.039 | 1.151 | 1.15E-02 |
| cds.Camellia_sinensis.comp3280_6_c0_seq3_m.55090 | PREDICT<br>ED: beta-glucosidase BoGH3B<br>[Theobroma cacao]                    | 10.718 | 3.3033 | 11.1 | 1  | 3  | 1  | 0.868 | 0.925 | 0.97  | 1.043 | 1.103 | 1.13  | 1.186 | 1.29E-02 |
| cds.Camellia_sinensis.comp3280_9_c0_seq9_m.17983 | PREDICT<br>ED: eukaryotic translation initiation factor 6-2<br>[Juglans regia] | 26.483 | 24.118 | 18   | 4  | 6  | 4  | 0.967 | 0.914 | 0.958 | 1.065 | 1.032 | 1.114 | 1.131 | 1.21E-02 |

|                                                 |                                                                                     |        |        |      |    |    |    |       |       |       |       |       |       |       |          |
|-------------------------------------------------|-------------------------------------------------------------------------------------|--------|--------|------|----|----|----|-------|-------|-------|-------|-------|-------|-------|----------|
| cds.Camellia_sinensis.comp32812_c0_seq1_m.9893  | PREDICTED:<br>acylamino-acid-releasing enzyme isoform X2<br>[Juglans regia]         | 90.165 | 101.05 | 20.3 | 13 | 27 | 13 | 0.951 | 0.959 | 0.952 | 1.065 | 1.038 | 1.077 | 1.111 | 7.21E-04 |
| cds.Camellia_sinensis.comp32814_c0_seq1_m.3754  | RanBP1 domain protein<br>[Medicago truncatula]                                      | 29.525 | 4.9083 | 12.4 | 3  | 3  | 3  | 1.06  | 1.048 | 0.954 | 0.964 | 1.019 | 0.953 | 0.959 | 3.52E-01 |
| cds.Camellia_sinensis.comp32818_c0_seq3_m.31143 | PREDICTED: short-chain type dehydrogenase/reductase isoform X2<br>[Jatropha curcas] | 27.946 | 6.6083 | 9    | 2  | 3  | 2  | 0.92  | 0.974 | 0.922 | 1.123 | 1.068 | 1.03  | 1.144 | 1.27E-02 |
| cds.Camellia_sinensis.comp32818_c0_seq3_m.31144 | transmembrane protein<br>[Arabidopsis thaliana]                                     | 14.878 | 6.5071 | 9.6  | 1  | 2  | 1  | 0.95  | 1.016 | 1.006 | 0.988 | 0.973 | 1.08  | 1.023 | 5.95E-01 |
| cds.Camellia_sinensis.comp32820_c0_seq1_m.30501 | S-adenosyl-L-methionine-dependent methyltransferase<br>[Medicago truncatula]        | 17.397 | 21.181 | 19.4 | 3  | 4  | 3  | 0.967 | 1.062 | 0.984 | 1.076 | 0.977 | 0.996 | 1.012 | 7.88E-01 |

|                                                  |                                                                                            |        |        |      |   |   |   |       |       |       |       |       |       |       |          |
|--------------------------------------------------|--------------------------------------------------------------------------------------------|--------|--------|------|---|---|---|-------|-------|-------|-------|-------|-------|-------|----------|
| cds.Camellia_sinensis.comp3282_0_c0_seq4_m.31281 | S-adenosyl-L-methionine-dependent methyltransferase<br>[Medicago truncatula]<br>PREDICTED: | 11.507 | 36.026 | 52.9 | 4 | 9 | 4 | 0.991 | 0.996 | 1.038 | 1.018 | 0.983 | 0.966 | 0.981 | 4.14E-01 |
| cds.Camellia_sinensis.comp3282_5_c0_seq1_m.3789  | nuclear pore complex protein GP210<br>[Vitis vinifera]<br>PREDICTED:                       | 89.918 | 11.104 | 1.5  | 1 | 1 | 1 | 0.991 | 1.061 | 1.044 | 1.063 | 0.924 | 0.926 | 0.941 | 2.84E-01 |
| cds.Camellia_sinensis.comp3282_5_c0_seq3_m.9245  | nuclear pore complex protein GP210<br>[Vitis vinifera]<br>PREDICTED:                       | 92.267 | 11.033 | 3.6  | 3 | 3 | 3 | 0.961 | 1.018 | 1.062 | 1.009 | 0.967 | 0.995 | 0.977 | 5.13E-01 |
| cds.Camellia_sinensis.comp3282_7_c0_seq1_m.7451  | granule-bound starch synthase 2, chloroplastic/amyloplastic isoform X2<br>[Vitis vinifera] | 83.244 | 17.404 | 6    | 5 | 6 | 5 | 0.986 | 1.003 | 1.04  | 0.965 | 1.035 | 1.009 | 0.993 | 8.05E-01 |

|                                                  |                                                                         |        |        |      |    |    |    |       |       |       |       |       |       |       |          |
|--------------------------------------------------|-------------------------------------------------------------------------|--------|--------|------|----|----|----|-------|-------|-------|-------|-------|-------|-------|----------|
| cds.Camellia_sinensis.comp3282_8_c0_seq1_m.1768  | PREDICT ED: enhancer of mRNA-decapping protein 4-like [Sesamum indicum] | 110.09 | 107.56 | 13.2 | 13 | 16 | 13 | 0.966 | 0.997 | 0.996 | 1.006 | 1.02  | 1.037 | 1.035 | 6.36E-02 |
| cds.Camellia_sinensis.comp3282_8_c0_seq1_m.1769  | PREDICT ED: enhancer of mRNA-decapping protein 4 [Vitis vinifera]       | 29.879 | 2.5966 | 5.8  | 1  | 2  | 1  |       |       |       |       |       |       |       |          |
| cds.Camellia_sinensis.comp3283_1_c0_seq1_m.10962 | PREDICT ED: long chain acyl-CoA synthetase 2 [Ipomoea nil]              | 49.022 | 1.6066 | 1.6  | 1  | 2  | 1  |       |       |       |       |       |       |       |          |
| cds.Camellia_sinensis.comp3283_6_c0_seq2_m.19349 | PREDICT ED: protein SSUH2 homolog [Ricinus communis]                    | 48.317 | 72.251 | 40.8 | 16 | 28 | 16 | 0.947 | 0.95  | 0.941 | 1.088 | 1.057 | 1.054 | 1.127 | 3.41E-04 |
| cds.Camellia_sinensis.comp3284_6_c0_seq1_m.32656 | PREDICT ED: cinnamoyl-CoA reductase 2-like [Nicotiana attenuata]        | 35.4   | 73.272 | 36.4 | 12 | 18 | 12 | 1.001 | 0.981 | 1.008 | 1.008 | 0.986 | 1.031 | 1.012 | 4.91E-01 |



|                                                 |                                                                                                                                                  |        |        |      |    |    |   |       |       |       |       |       |       |       |          |
|-------------------------------------------------|--------------------------------------------------------------------------------------------------------------------------------------------------|--------|--------|------|----|----|---|-------|-------|-------|-------|-------|-------|-------|----------|
| cds.Camellia_sinensis.comp32847_c0_seq1_m.24332 | PREDICTED: RNA-binding KH domain-containing protein PEPPER [Vitis vinifera] RNA-binding KH domain-containing protein PEPPER-like [Cajanus cajan] | 49.479 | 37.144 | 23.6 | 11 | 15 | 6 | 0.972 | 0.927 | 0.928 | 1.025 | 1.082 | 1.017 | 1.105 | 1.62E-02 |
| cds.Camellia_sinensis.comp32847_c0_seq2_m.26434 | PREDICTED: alpha-glucosidase-like [Vitis vinifera]                                                                                               | 48.055 | 79.058 | 26.5 | 12 | 16 | 7 | 0.971 | 0.968 | 0.965 | 1.025 | 1.035 | 1.009 | 1.057 | 1.94E-03 |
| cds.Camellia_sinensis.comp32850_c0_seq2_m.6603  | PREDICTED: alpha-glucosidase [Juglans regia]                                                                                                     | 102.68 | 24.61  | 10.1 | 9  | 16 | 7 | 0.927 | 0.924 | 0.919 | 1.098 | 1.069 | 1.111 | 1.183 | 1.37E-04 |
| cds.Camellia_sinensis.comp32850_c0_seq3_m.7253  | PREDICTED: peroxisomal membrane protein PEX14 [Juglans regia]                                                                                    | 103.12 | 9.0077 | 5.3  | 5  | 10 | 3 | 0.914 | 0.921 | 0.901 | 1.118 | 1.092 | 1.103 | 1.211 | 3.70E-05 |
| cds.Camellia_sinensis.comp32851_c0_seq1_m.13429 |                                                                                                                                                  | 37.63  | 18.71  | 11.5 | 5  | 5  | 5 | 0.983 | 0.989 | 0.992 | 0.994 | 0.986 | 1.043 | 1.02  | 3.88E-01 |



|                                                  |                                                                                        |        |        |      |   |   |   |       |       |       |       |       |       |       |          |
|--------------------------------------------------|----------------------------------------------------------------------------------------|--------|--------|------|---|---|---|-------|-------|-------|-------|-------|-------|-------|----------|
| cds.Camellia_sinensis.comp3286_7_c1_seq2_m.38138 | PREDICT<br>ED:<br>ubiquitin-conjugating enzyme E2 2 isoform X1<br>[Gossypium hirsutum] | 17.334 | 1.7217 | 15.8 | 2 | 2 | 1 | 0.995 | 1.102 | 0.964 | 0.943 | 0.956 | 1.039 | 0.96  | 4.69E-01 |
| cds.Camellia_sinensis.comp3286_7_c2_seq1_m.1279  | PREDICT<br>ED:<br>nucleolin 2-like isoform X1<br>[Juglans regia]                       | 101.17 | 1.6245 | 1.5  | 1 | 1 | 1 |       |       |       |       |       |       |       |          |
| cds.Camellia_sinensis.comp3286_7_c2_seq2_m.8329  | PREDICT<br>ED:<br>exocyst complex component EXO70A1<br>[Vitis vinifera]                | 74.002 | -2     | 1.5  | 1 | 1 | 1 | 1.068 | 1.022 | 1.13  | 0.954 | 0.917 | 0.899 | 0.86  | 1.15E-02 |
| cds.Camellia_sinensis.comp3286_9_c0_seq5_m.46979 | PREDICT<br>ED: V-type proton ATPase subunit F<br>[Sesamum                              | 14.523 | 15.556 | 21.5 | 3 | 4 | 3 | 1.01  | 0.97  | 0.926 | 1.066 | 1.053 | 0.993 | 1.071 | 1.08E-01 |

|                                                   |                                                                                                           |        |        |      |   |    |   |       |       |       |       |       |       |       |          |
|---------------------------------------------------|-----------------------------------------------------------------------------------------------------------|--------|--------|------|---|----|---|-------|-------|-------|-------|-------|-------|-------|----------|
| cds.Camellia_sinensis.comp3287_1_c0_seq1_m.5864   | PREDICT ED: exocyst complex component SEC3A [Theobroma cacao]                                             | 100.12 | 11.192 | 3.3  | 3 | 3  | 3 | 0.99  | 0.984 | 1.068 | 0.981 | 0.953 | 1.048 | 0.98  | 6.31E-01 |
| cds.Camellia_sinensis.comp3287_2_c0_seq1_m.4024_6 | PREDICT ED: photosynthetic NDH subunit of lumenal location 1, chloroplastic isoform X1 [Nelumbo nucifera] | 23.951 | 35.807 | 43.3 | 9 | 17 | 9 | 0.97  | 0.988 | 1.014 | 0.976 | 1.025 | 0.998 | 1.009 | 6.62E-01 |
| cds.Camellia_sinensis.comp3287_2_c0_seq5_m.2326   | PREDICT ED: dolichyl-diphosphooligosaccharide--protein glycosyltransferase subunit 1B [Jatropha curcas]   | 52.023 | 18.148 | 14.7 | 8 | 9  | 8 | 1.006 | 0.972 | 0.992 | 1.007 | 0.992 | 1.047 | 1.026 | 2.55E-01 |
| cds.Camellia_sinensis.comp3287_5_c0_seq1_m.22914  | PREDICT ED: elongation factor Ts, mitochondrial [Ricinus communis]                                        | 21.138 | 2.5364 | 13.3 | 3 | 3  | 3 | 1.024 | 0.921 | 1.041 | 1.022 | 1.003 | 1     | 1.013 | 7.31E-01 |

|                                                  |                                                                                   |        |        |      |   |   |   |       |       |       |       |       |       |       |          |
|--------------------------------------------------|-----------------------------------------------------------------------------------|--------|--------|------|---|---|---|-------|-------|-------|-------|-------|-------|-------|----------|
| cds.Camellia_sinensis.comp3287_6_c0_seq9_m.20024 | histidine phosphatase family (branch 1) protein [Medicago truncatula] PREDICT ED: | 26.609 | 11.541 | 15.8 | 4 | 6 | 4 | 0.972 | 0.981 | 0.94  | 1.01  | 1.056 | 1.062 | 1.081 | 1.90E-02 |
| cds.Camellia_sinensis.comp3288_0_c0_seq2_m.10056 | topless-related protein 3-like [Sesamum indicum] PREDICT ED:                      | 82.193 | 10.865 | 7.5  | 6 | 7 | 6 | 0.917 | 0.938 | 0.951 | 1.073 | 1.118 | 1.053 | 1.156 | 2.16E-03 |
| cds.Camellia_sinensis.comp3289_1_c1_seq3_m.39628 | protein CREG1 isoform X1 [Sesamum indicum] PREDICT ED:                            | 22.324 | 5.7675 | 10   | 2 | 3 | 2 | 1.033 | 1.019 | 0.927 | 0.949 | 1.024 | 1.05  | 1.015 | 7.61E-01 |
| cds.Camellia_sinensis.comp3289_6_c0_seq2_m.3153  | protein transport protein Sec24-like At4g32640 isoform X1 [Vitis vinifera]        | 101.38 | 14.385 | 5.5  | 5 | 5 | 5 | 0.988 | 0.984 | 1.019 | 0.983 | 1.032 | 1.004 | 1.009 | 6.33E-01 |

|                                |                   |                                                                                                         |        |        |      |    |    |    |       |       |       |       |       |       |       |          |
|--------------------------------|-------------------|---------------------------------------------------------------------------------------------------------|--------|--------|------|----|----|----|-------|-------|-------|-------|-------|-------|-------|----------|
| cds.Camellia_sinensis.comp3289 | 8_c0_seq1_m.8011  | PREDICT<br>ED:<br>NADPH--<br>cytochrome P450<br>reductase<br>[Theobroma cacao]                          | 76.867 | 30.958 | 13.4 | 10 | 13 | 10 | 1.009 | 1.127 | 1.058 | 0.968 | 0.919 | 0.92  | 0.879 | 2.41E-02 |
| cds.Camellia_sinensis.comp3289 | 9_c0_seq1_m.5712  | PREDICT<br>ED:<br>polyribonucleotide<br>nucleotidyl transferase<br>2,<br>mitochondrial [Vitis vinifera] | 103.65 | 4.9102 | 4.3  | 5  | 5  | 5  | 0.922 | 1.009 | 1.024 | 1.056 | 1.02  | 0.995 | 1.039 | 3.49E-01 |
| cds.Camellia_sinensis.comp3290 | 0_c0_seq2_m.8385  | PREDICT<br>ED:<br>exocyst complex<br>component EXO84B<br>[Vitis vinifera]                               | 85.674 | 10.938 | 2.7  | 2  | 3  | 2  | 1.068 | 1.074 | 0.915 | 1.052 | 0.914 | 0.976 | 0.962 | 6.04E-01 |
| cds.Camellia_sinensis.comp3290 | 1_c0_seq1_m.18562 | PREDICT<br>ED: low-temperature-induced<br>cysteine proteinase<br>[Vitis vinifera]                       | 55.425 | 53.097 | 11   | 5  | 16 | 4  | 1.038 | 1.007 | 0.973 | 0.984 | 0.982 | 0.967 | 0.972 | 2.20E-01 |

|                                                  |                                                          |        |        |      |    |    |    |       |       |       |       |       |       |       |          |
|--------------------------------------------------|----------------------------------------------------------|--------|--------|------|----|----|----|-------|-------|-------|-------|-------|-------|-------|----------|
|                                                  | PREDICT<br>ED:                                           |        |        |      |    |    |    |       |       |       |       |       |       |       |          |
| cds.Camellia_sinensis.comp3290_2_c0_seq1_m.22717 | cytochrome P450 81E8-like [Fragaria vesca subsp. vesca]  | 56.736 | 6.5762 | 6.4  | 3  | 3  | 1  | 1.005 | 1.139 | 1.048 | 0.969 | 0.936 | 0.898 | 0.878 | 3.95E-02 |
|                                                  | PREDICT<br>ED: short-chain                               |        |        |      |    |    |    |       |       |       |       |       |       |       |          |
| cds.Camellia_sinensis.comp3290_3_c0_seq1_m.28618 | dehydrogenase TIC 32, chloroplastic [Eucalyptus grandis] | 35.246 | 1.6557 | 2.8  | 1  | 1  | 1  |       |       |       |       |       |       |       |          |
|                                                  | PREDICT<br>ED: rab escort protein 1                      |        |        |      |    |    |    |       |       |       |       |       |       |       |          |
| cds.Camellia_sinensis.comp3290_5_c0_seq2_m.23124 | [Vitis vinifera]                                         | 21.926 | 1.1978 | 3.5  | 1  | 1  | 1  | 0.936 | 0.937 | 1.07  | 1     | 1.009 | 1.069 | 1.046 | 3.98E-01 |
|                                                  | PREDICT<br>ED: beta-glucosidase-like                     |        |        |      |    |    |    |       |       |       |       |       |       |       |          |
| cds.Camellia_sinensis.comp3290_8_c0_seq1_m.21148 | SFR2, chloroplastic isoform X2 [Vitis vinifera]          | 66.04  | 32.834 | 13.5 | 8  | 11 | 8  | 0.982 | 1.025 | 1.031 | 0.989 | 0.991 | 1.016 | 0.986 | 4.79E-01 |
|                                                  | PREDICT<br>ED:                                           |        |        |      |    |    |    |       |       |       |       |       |       |       |          |
| cds.Camellia_sinensis.comp3291_4_c0_seq1_m.2641  | myosin-9-like [Populus euphratica]                       | 139.41 | 177.1  | 31.8 | 36 | 48 | 36 | 1.02  | 1.015 | 1.016 | 0.966 | 0.962 | 0.99  | 0.956 | 7.94E-03 |

|                                                  |                                                                                           |        |        |      |   |    |   |       |       |       |       |       |       |       |          |
|--------------------------------------------------|-------------------------------------------------------------------------------------------|--------|--------|------|---|----|---|-------|-------|-------|-------|-------|-------|-------|----------|
| cds.Camellia_sinensis.comp3291_7_c0_seq4_m.31727 | PREDICTED:<br>chorismate mutase 1, chloroplastic-like isoform X1<br>[Nelumbo nucifera]    | 36.759 | 20.297 | 23.6 | 7 | 7  | 5 | 1.255 | 0.89  | 1.197 | 0.779 | 0.974 | 0.861 | 0.782 | 1.30E-01 |
| cds.Camellia_sinensis.comp3291_7_c0_seq5_m.34127 | PREDICTED:<br>chorismate mutase 3, chloroplastic [Prunus mume]                            | 37.031 | 2.032  | 12.7 | 4 | 4  | 2 | 0.983 | 1.096 | 0.644 | 0.883 | 1.121 | 1.283 | 1.207 | 3.61E-01 |
| cds.Camellia_sinensis.comp3291_9_c0_seq1_m.35142 | PREDICTED:<br>shootin-1-like [Juglans regia]                                              | 30.589 | 1.7725 | 4    | 1 | 1  | 1 | 0.956 | 1.057 | 1.04  | 0.983 | 1.033 | 0.944 | 0.97  | 4.92E-01 |
| cds.Camellia_sinensis.comp3292_1_c0_seq3_m.29082 | PREDICTED:<br>ATP-dependent (S)-NAD(P)H-hydrate dehydratase isoform X2<br>[Juglans regia] | 39.62  | 24.919 | 31.9 | 9 | 11 | 7 | 0.939 | 0.969 | 0.979 | 1.046 | 1.083 | 1.011 | 1.088 | 2.35E-02 |



|                                                  |                                                                                    |        |        |      |    |    |    |       |       |       |       |       |       |       |          |
|--------------------------------------------------|------------------------------------------------------------------------------------|--------|--------|------|----|----|----|-------|-------|-------|-------|-------|-------|-------|----------|
| cds.Camellia_sinensis.comp3292_1_c0_seq5_m.30515 | PREDICTED: ATP-dependent (S)-NAD(P)H-hydratase isoform X2 [Juglans regia]          | 39.752 | 5.2957 | 11.2 | 4  | 5  | 2  | 0.906 | 0.925 | 0.962 | 1.063 | 1.14  | 1.041 | 1.161 | 1.02E-02 |
| cds.Camellia_sinensis.comp3292_2_c0_seq8_m.5477  | COP1-interacting protein-like [Medicago truncatula]                                | 91.503 | -2     | 1.2  | 1  | 1  | 1  | 0.896 | 0.955 | 1.058 | 1.035 | 1.033 | 1.051 | 1.072 | 2.77E-01 |
| cds.Camellia_sinensis.comp3292_9_c0_seq1_m.26024 | PREDICTED: IAA-amino acid hydrolase ILR1-like 4 [Vitis vinifera]                   | 46.508 | 43.968 | 30.8 | 11 | 20 | 11 | 0.977 | 0.977 | 0.971 | 1.025 | 1.044 | 1.009 | 1.052 | 7.20E-03 |
| cds.Camellia_sinensis.comp3293_6_c1_seq1_m.15922 | PREDICTED: methyl-CpG-binding domain-containing protein 11-like [Nelumbo nucifera] | 17.779 | 1.9602 | 7.5  | 1  | 1  | 1  | 1.15  | 1.065 | 1.133 | 0.835 | 0.955 | 0.83  | 0.783 | 8.68E-03 |
| cds.Camellia_sinensis.comp3293_6_c1_seq1_m.15923 |                                                                                    | 17.216 | 2.7012 | 12.8 | 2  | 2  | 2  | 1.235 | 1.101 | 1.145 | 0.778 | 0.783 | 0.902 | 0.708 | 4.14E-03 |

|                                                 |                                                                                                |        |        |      |    |    |    |       |       |       |       |       |       |       |          |
|-------------------------------------------------|------------------------------------------------------------------------------------------------|--------|--------|------|----|----|----|-------|-------|-------|-------|-------|-------|-------|----------|
| cds.Camellia_sinensis.comp32938_c0_seq1_m.2560  | PREDICTED: ABC transporter B family member 27-like [Juglans regia]                             | 69.361 | 9.9672 | 8.1  | 6  | 8  | 6  | 0.991 | 1.023 | 1.068 | 1.025 | 0.953 | 1.032 | 0.977 | 5.16E-01 |
| cds.Camellia_sinensis.comp32939_c0_seq1_m.21635 | PREDICTED: probable protein phosphatase 2C 59 isoform X3 [Ziziphus jujuba]                     | 33.229 | 16.795 | 20.6 | 6  | 7  | 4  | 1.019 | 0.94  | 0.931 | 1.031 | 1.035 | 1.031 | 1.072 | 1.35E-01 |
| cds.Camellia_sinensis.comp32940_c0_seq1_m.6630  | PREDICTED: receptor-like protein kinase FERONIA [Eucalyptus grandis]                           | 97.286 | 3.5028 | 2    | 2  | 2  | 1  | 1.034 | 0.994 | 0.975 | 1.016 | 0.975 | 1.011 | 1     | 9.93E-01 |
| cds.Camellia_sinensis.comp32944_c0_seq2_m.12177 | PREDICTED: phosphoribosylaminoimidazole carboxylase, chloroplastic isoform X1 [Vitis vinifera] | 63.85  | 67.56  | 21.8 | 10 | 12 | 10 | 0.963 | 0.957 | 0.979 | 1.063 | 0.97  | 1.037 | 1.059 | 1.15E-01 |

|                                                 |                                                                                 |        |        |      |    |    |    |       |       |       |       |       |       |       |          |
|-------------------------------------------------|---------------------------------------------------------------------------------|--------|--------|------|----|----|----|-------|-------|-------|-------|-------|-------|-------|----------|
| cds.Camellia_sinensis.comp32948_c0_seq1_m.27404 | PREDICT<br>ED: early nodulin-93-like isoform X1 [Cucumis sativus]               | 12.508 | 1.3107 | 8.6  | 1  | 3  | 1  | 0.938 | 1.017 | 0.848 | 1.08  | 0.968 | 1.175 | 1.15  | 1.44E-01 |
| cds.Camellia_sinensis.comp32951_c0_seq4_m.5915  | PREDICT<br>ED: probable fructose-6-phosphate 6-phosphotransferase [Prunus mume] | 42.152 | 140.47 | 35.2 | 11 | 26 | 10 | 1.039 | 1.025 | 1.034 | 0.958 | 0.961 | 1.011 | 0.946 | 3.51E-02 |
| cds.Camellia_sinensis.comp32954_c0_seq1_m.19253 | PREDICT<br>ED: tocopherol cyclase, chloroplast-like [Juglans regia]             | 57.86  | 69.003 | 30.9 | 14 | 22 | 14 | 0.996 | 1.002 | 0.997 | 0.983 | 0.986 | 1.035 | 1.003 | 8.86E-01 |
| cds.Camellia_sinensis.comp32955_c1_seq2_m.24660 | PREDICT<br>ED: spermine synthase-like [Pyrus bretschneideri]                    | 17.418 | 2.7036 | 9    | 1  | 2  | 1  |       |       |       |       |       |       |       |          |
| cds.Camellia_sinensis.comp32956_c0_seq1_m.16454 | PREDICT<br>ED: proline--tRNA ligase, chloroplast/mitochondrial [Vitis vinifera] | 41.292 | 38.907 | 32.7 | 11 | 13 | 11 | 0.982 | 0.983 | 0.998 | 1.002 | 0.996 | 1.009 | 1.015 | 8.34E-02 |

|                                                  |                                                                                          |        |        |      |    |    |    |       |       |       |       |       |       |       |          |
|--------------------------------------------------|------------------------------------------------------------------------------------------|--------|--------|------|----|----|----|-------|-------|-------|-------|-------|-------|-------|----------|
| cds.Camellia_sinensis.comp32956_c0_seq1_m.16455  | PREDICTED:<br>proline--tRNA ligase, chloroplastic/mitochondrial-like [Ziziphus jujuba]   | 21.203 | 19.885 | 6.8  | 1  | 2  | 1  | 1.017 | 0.983 | 1.017 | 0.892 | 1.013 | 1.076 | 0.988 | 8.05E-01 |
| cds.Camellia_sinensis.comp32958_c0_seq1_m.15709  | PREDICTED:<br>protein disulfide isomerase-like 1-6 [Juglans regia]                       | 69.483 | 34.066 | 17.8 | 10 | 15 | 10 | 0.946 | 0.985 | 0.997 | 1.04  | 1.068 | 1.033 | 1.073 | 2.03E-02 |
| cds.Camellia_sinensis.comp32960_c0_seq25_m.26509 | PREDICTED:<br>ubiquitin thioesterase otubain-like [Prunus mume]                          | 34.039 | 10.643 | 8.9  | 3  | 4  | 3  | 0.966 | 0.948 | 1.032 | 0.979 | 0.98  | 1.018 | 1.011 | 7.22E-01 |
| cds.Camellia_sinensis.comp32962_c0_seq4_m.49070  | PREDICTED:<br>probable complex I intermediate-associated protein 30 [Eucalyptus grandis] | 15.347 | 12.445 | 11.1 | 1  | 2  | 1  | 0.956 | 1.038 | 0.977 | 0.961 | 1.041 | 1.04  | 1.024 | 5.51E-01 |

|                                                     |                                                                                                            |        |        |      |    |    |    |       |       |       |       |       |       |       |          |
|-----------------------------------------------------|------------------------------------------------------------------------------------------------------------|--------|--------|------|----|----|----|-------|-------|-------|-------|-------|-------|-------|----------|
| cds.Camellia_sinensis.comp3296_5_c0_seq1_0_m.2942_4 | PREDICT<br>ED: 15-cis-phytoene desaturase-like<br>[Citrus sinensis]                                        | 25.462 | 10.155 | 10.1 | 2  | 2  | 2  | 0.848 | 0.931 | 0.922 | 1.172 | 1.143 | 1.038 | 1.241 | 1.04E-02 |
| cds.Camellia_sinensis.comp3296_5_c0_seq6_m.16402    | Phytoene dehydrogenase<br>[Morus notabilis]<br>Uncharacterized<br>RNA-binding protein<br>[Morus notabilis] | 14.666 | 17.376 | 38.9 | 4  | 4  | 4  | 0.87  | 0.907 | 0.997 | 1.173 | 0.931 | 1.081 | 1.148 | 1.61E-01 |
| cds.Camellia_sinensis.comp3296_6_c0_seq4_m.46913    | RNA-binding protein<br>[Morus notabilis]                                                                   | 21.176 | 28.295 | 34.6 | 5  | 13 | 4  | 0.971 | 0.973 | 0.966 | 1.049 | 1.028 | 1.051 | 1.075 | 6.19E-04 |
| cds.Camellia_sinensis.comp3296_6_c1_seq1_m.3138     | PREDICT<br>ED: beta-xylosidase/alpha-L-arabinofuranosidase<br>2<br>[Theobroma cacao]                       | 85.23  | 89.468 | 21.5 | 14 | 39 | 13 | 0.986 | 0.96  | 0.945 | 1.025 | 1.033 | 1.043 | 1.073 | 6.30E-03 |
| cds.Camellia_sinensis.comp3297_0_c0_seq1_m.25443    | PREDICT<br>ED: 26S protease regulatory subunit 8 homolog A-like<br>[Nelumbo nucifera]                      | 47.343 | 16.414 | 43.8 | 16 | 36 | 1  | 1.079 | 0.963 | 1.092 | 0.988 | 0.91  | 0.963 | 0.913 | 1.27E-01 |

|                                                  |                                                                                                            |        |        |      |    |    |    |       |       |       |       |       |       |       |          |
|--------------------------------------------------|------------------------------------------------------------------------------------------------------------|--------|--------|------|----|----|----|-------|-------|-------|-------|-------|-------|-------|----------|
| cds.Camellia_sinensis.comp3297_0_c0_seq2_m.28918 | PREDICT<br>ED: 26S<br>protease<br>regulatory<br>subunit 8<br>homolog<br>A [Elaeis<br>guineensis<br>PREDICT | 47.36  | 113.48 | 48.3 | 18 | 38 | 3  | 0.964 | 0.962 | 1.009 | 1     | 1.06  | 0.988 | 1.039 | 2.33E-01 |
| cds.Camellia_sinensis.comp3297_4_c0_seq1_m.6813  | ED:<br>protein<br>VACUOL<br>ELESS1<br>[Ziziphus<br>jujuba]                                                 | 29.532 | 2.8655 | 3.8  | 1  | 1  | 1  | 1.05  | 1.13  | 0.945 | 0.921 | 0.866 | 1.073 | 0.915 | 3.35E-01 |
| cds.Camellia_sinensis.comp3297_8_c1_seq1_m.3957  | DUF1680<br>domain<br>protein<br>[Medicago<br>truncatula]<br>PREDICT                                        | 96.576 | 123.37 | 22.1 | 17 | 35 | 17 | 1.033 | 1.019 | 1.025 | 0.962 | 0.959 | 0.958 | 0.936 | 8.42E-05 |
| cds.Camellia_sinensis.comp3297_8_c2_seq3_m.35595 | ED:<br>thioredoxi<br>n-like 2,<br>chloroplast<br>ic [Juglans<br>regia]<br>PREDICT                          | 24.845 | 2.7549 | 5.3  | 1  | 2  | 1  | 1.085 | 0.933 | 0.968 | 1.065 | 1.012 | 0.944 | 1.012 | 8.38E-01 |
| cds.Camellia_sinensis.comp3297_9_c0_seq7_m.19787 | ED: starch<br>synthase<br>VI isoform<br>X1 [Vitis<br>vinifera]                                             | 67.189 | 36.163 | 14.8 | 7  | 8  | 7  | 0.965 | 0.963 | 0.97  | 0.995 | 1.086 | 1.054 | 1.082 | 9.41E-02 |

|                                |                                                                                                     |        |        |      |    |    |    |       |       |       |       |       |       |       |          |
|--------------------------------|-----------------------------------------------------------------------------------------------------|--------|--------|------|----|----|----|-------|-------|-------|-------|-------|-------|-------|----------|
| cds.Camellia_sinensis.comp3298 | PREDICTED: tryptophan synthase beta chain 1<br>[Cucumis melo]                                       | 52.249 | 66.155 | 27.4 | 12 | 16 | 12 | 0.997 | 1.003 | 0.961 | 1.006 | 1.046 | 0.993 | 1.028 | 2.46E-01 |
| cds.Camellia_sinensis.comp3299 | PREDICTED: beta-hexosaminidase 3<br>[Juglans regia]                                                 | 63.604 | 144.08 | 31.3 | 17 | 44 | 16 | 1.013 | 1.011 | 1.014 | 0.993 | 1.012 | 0.968 | 0.979 | 2.33E-01 |
| cds.Camellia_sinensis.comp3299 | PREDICTED: 7-hydroxymethyl chlorophyll a reductase, chloroplastic<br>[Daucus carota subsp. sativus] | 21.122 | 3.9041 | 9.7  | 2  | 3  | 2  | 1.033 | 1.027 | 0.997 | 1.034 | 0.94  | 0.972 | 0.964 | 2.78E-01 |
| cds.Camellia_sinensis.comp3299 | PREDICTED: beta-glucosidase 11-like<br>[Vitis vinifera]                                             | 15.516 | 4.7417 | 9.2  | 1  | 1  | 1  | 0.96  | 1.008 | 1.005 | 1.136 | 1.064 | 0.854 | 1.027 | 8.32E-01 |









|                                                  |                                                                |        |        |      |   |    |   |       |       |       |       |       |       |       |          |
|--------------------------------------------------|----------------------------------------------------------------|--------|--------|------|---|----|---|-------|-------|-------|-------|-------|-------|-------|----------|
|                                                  | PREDICT<br>ED:<br>protein                                      |        |        |      |   |    |   |       |       |       |       |       |       |       |          |
| cds.Camellia_sinensis.comp3301_3_c0_seq1_m.25050 | TRIGALACTOSYL DIACYLGLYCEROL 4, chloroplastic [Vitis vinifera] | 52.738 | 5.8688 | 5.7  | 3 | 4  | 3 | 1.004 | 0.953 | 0.984 | 0.997 | 1.005 | 0.996 | 1.019 | 2.77E-01 |
|                                                  | PREDICT<br>ED:<br>protein                                      |        |        |      |   |    |   |       |       |       |       |       |       |       |          |
| cds.Camellia_sinensis.comp3301_3_c0_seq2_m.25698 | TRIGALACTOSYL DIACYLGLYCEROL 4, chloroplastic [Prunus mume]    | 52.588 | 5.4637 | 6.5  | 3 | 5  | 3 | 0.96  | 1.018 | 1.1   | 1.062 | 0.918 | 0.956 | 0.954 | 4.63E-01 |
|                                                  | PREDICT<br>ED: zinc                                            |        |        |      |   |    |   |       |       |       |       |       |       |       |          |
| cds.Camellia_sinensis.comp3301_4_c0_seq5_m.19830 | finger CCCH domain-containing protein 49 [Vitis vinifera]      | 55.008 | 9.6304 | 13.8 | 6 | 6  | 6 | 1.018 | 1.006 | 1.07  | 0.958 | 0.948 | 1     | 0.939 | 6.63E-02 |
|                                                  | NADH dehydrogenase subunit 7 (chloroplast) [Camellia sinensis] |        |        |      |   |    |   |       |       |       |       |       |       |       |          |
| cds.Camellia_sinensis.comp3301_7_c1_seq4_7_m.330 |                                                                | 45.653 | 55.381 | 23.2 | 8 | 13 | 8 | 0.997 | 0.984 | 0.974 | 1.013 | 1.014 | 0.997 | 1.023 | 5.66E-02 |

|                                                   |                                                                                        |        |        |      |   |    |   |       |       |       |       |       |       |       |          |
|---------------------------------------------------|----------------------------------------------------------------------------------------|--------|--------|------|---|----|---|-------|-------|-------|-------|-------|-------|-------|----------|
| cds.Camellia_sinensis.comp3301_7_c1_seq6_4_m.1059 | photosystem II p680 chlorophyll A apoprotein (chloroplast) [Camellia crapnelliana]     | 39.493 | 212.71 | 27.2 | 9 | 64 | 9 | 0.965 | 1.013 | 0.978 | 1.034 | 1.007 | 1.018 | 1.035 | 1.04E-01 |
| cds.Camellia_sinensis.comp3301_7_c1_seq6_4_m.1060 | ATP-dependent Clp protease proteolytic subunit (chloroplast) [Diplopanax stachyanthus] | 21.995 | 46.072 | 18.4 | 4 | 11 | 4 | 0.992 | 1.014 | 1.016 | 0.998 | 1.009 | 0.985 | 0.99  | 3.90E-01 |
| cds.Camellia_sinensis.comp3301_7_c1_seq6_6_m.1341 | NADH dehydrogenase subunit 2 (chloroplast) [Ardisia polysticta]                        | 58.583 | 3.0367 | 3.1  | 2 | 2  | 2 | 1.036 | 1.034 | 1.023 | 0.97  | 0.902 | 1.03  | 0.938 | 2.33E-01 |
| cds.Camellia_sinensis.comp3301_7_c1_seq6_7_m.1798 | photosystem II protein D1 (chloroplast) [Scopolia parviflora]                          | 38.95  | 127.22 | 22.9 | 8 | 59 | 8 | 0.966 | 0.987 | 0.987 | 1.021 | 1.022 | 1.027 | 1.044 | 4.24E-03 |



|                                |                                                                                         |        |        |      |    |    |   |       |       |       |       |       |       |       |          |
|--------------------------------|-----------------------------------------------------------------------------------------|--------|--------|------|----|----|---|-------|-------|-------|-------|-------|-------|-------|----------|
| cds.Camellia_sinensis.comp3301 | 30S ribosomal protein S7 (chloroplast) [Camellia crapnelliana]                          | 12.03  | 7.9022 | 26.6 | 3  | 4  | 3 | 1.105 | 1.034 | 1.135 | 0.882 | 0.931 | 0.924 | 0.836 | 5.30E-03 |
| cds.Camellia_sinensis.comp3301 | 7_c1_seq9_m.134<br>ED: glutathione S-transferase T1 [Ziziphus jujuba]                   | 28.014 | 32.788 | 37.2 | 9  | 26 | 4 | 0.914 | 0.944 | 0.973 | 1.088 | 1.045 | 1.081 | 1.135 | 4.44E-03 |
| cds.Camellia_sinensis.comp3301 | 8_c1_seq2_m.49711<br>ED: glutathione S-transferase T1 [Ricinus communis]                | 21.296 | 100.49 | 58.8 | 11 | 27 | 6 | 0.867 | 0.869 | 0.879 | 1.174 | 1.091 | 1.129 | 1.298 | 2.76E-04 |
| cds.Camellia_sinensis.comp3301 | 9_c0_seq5_m.5844<br>ED: ABC transporter A family member 7 [Vitis vinifera]              | 106    | 5.1401 | 2.4  | 2  | 2  | 2 |       |       |       |       |       |       |       |          |
| cds.Camellia_sinensis.comp3302 | 8_c0_seq1_m.3160<br>ED: protein transport protein Sec24-like At3g07100 [Vitis vinifera] | 115.42 | 5.728  | 4.7  | 5  | 5  | 5 | 1.027 | 0.988 | 0.999 | 1     | 1.058 | 1.005 | 1.016 | 4.98E-01 |

|                                |                                                                                          |        |        |      |    |    |    |       |       |       |       |       |       |       |          |
|--------------------------------|------------------------------------------------------------------------------------------|--------|--------|------|----|----|----|-------|-------|-------|-------|-------|-------|-------|----------|
| cds.Camellia_sinensis.comp3303 | PREDICTED:<br>chaperone protein ClpB3, chloroplastic isoform X2<br>[Sesamum indicum]     | 110.2  | 296.03 | 42.7 | 39 | 73 | 36 | 1.02  | 1.023 | 1.026 | 0.984 | 0.981 | 0.976 | 0.958 | 1.24E-04 |
| cds.Camellia_sinensis.comp3303 | RNA ligase, putative<br>[Medicago truncatula]                                            | 29.422 | 6.8522 | 6.5  | 1  | 1  | 1  |       |       |       |       |       |       |       |          |
| cds.Camellia_sinensis.comp3304 | PREDICTED:<br>isoamylase 3, chloroplastic-like<br>[Malus domestica]                      | 93.557 | 76.25  | 17.3 | 13 | 15 | 13 | 1.051 | 1.081 | 1.018 | 0.93  | 0.95  | 0.936 | 0.894 | 3.74E-03 |
| cds.Camellia_sinensis.comp3305 | PREDICTED:<br>sucrose synthase 2<br>[Ziziphus jujuba]                                    | 101.16 | 323.31 | 36.2 | 32 | 76 | 29 | 0.905 | 0.925 | 0.905 | 1.103 | 1.109 | 1.095 | 1.209 | 2.01E-05 |
| cds.Camellia_sinensis.comp3305 | PREDICTED:<br>epimerase family protein SDR39U1 homolog, chloroplastic<br>[Juglans regia] | 41.043 | 69.33  | 32.8 | 11 | 24 | 11 | 0.958 | 0.96  | 0.98  | 1.009 | 1.078 | 1.014 | 1.07  | 4.02E-02 |

|                                |                                                                                    |        |      |   |    |   |       |       |       |       |       |       |       |          |
|--------------------------------|------------------------------------------------------------------------------------|--------|------|---|----|---|-------|-------|-------|-------|-------|-------|-------|----------|
| cds.Camellia_sinensis.comp3305 | 59.193                                                                             | 46.334 | 16.5 | 6 | 11 | 5 | 1.034 | 1.039 | 1.024 | 1.035 | 0.97  | 0.969 | 0.96  | 1.39E-01 |
| 5_c0_seq1_m.12922              | PREDICTED:<br>ubiquitin domain-containing protein DSK2a-like<br>[Nelumbo nucifera] |        |      |   |    |   |       |       |       |       |       |       |       |          |
| cds.Camellia_sinensis.comp3306 | 17.502                                                                             | 31.985 | 26.5 | 4 | 9  | 4 | 1.15  | 1.116 | 1.084 | 0.831 | 0.917 | 0.881 | 0.785 | 1.88E-03 |
| 7_c0_seq2_m.36662              | PREDICTED:<br>ribosomal protein L23a<br>[Cucumis melo]                             |        |      |   |    |   |       |       |       |       |       |       |       |          |
| cds.Camellia_sinensis.comp3306 | 60.422                                                                             | 17.947 | 16.4 | 7 | 8  | 7 | 0.989 | 1.028 | 1.02  | 1.028 | 0.966 | 0.964 | 0.974 | 3.32E-01 |
| 7_c1_seq1_m.17116              | PREDICTED:<br>calcium-dependent protein kinase 26-like<br>[Gossypium hirsutum]     |        |      |   |    |   |       |       |       |       |       |       |       |          |
| cds.Camellia_sinensis.comp3307 | 64.81                                                                              | 1.8299 | 2.3  | 1 | 1  | 1 |       |       |       |       |       |       |       |          |
| 0_c0_seq1_m.2815               | PREDICTED:<br>fructokinase-like 2, chloroplastic isoform X2 [Vitis vinifera]       |        |      |   |    |   |       |       |       |       |       |       |       |          |



|                                                  |                                                                                      |        |        |      |    |    |    |       |       |       |       |       |       |       |          |
|--------------------------------------------------|--------------------------------------------------------------------------------------|--------|--------|------|----|----|----|-------|-------|-------|-------|-------|-------|-------|----------|
| cds.Camellia_sinensis.comp3307_0_c0_seq3_m.5410  | PREDICT<br>ED: folate synthesis bifunctional protein, mitochondrial [Vitis vinifera] | 55.462 | 8.9523 | 7.7  | 4  | 6  | 4  | 0.946 | 1.095 | 1.055 | 0.914 | 0.973 | 1.02  | 0.939 | 3.16E-01 |
| cds.Camellia_sinensis.comp3307_0_c1_seq1_m.4292  | PREDICT<br>ED: AP-4 complex subunit epsilon [Jatropha curcas]                        | 112.72 | 27.531 | 9.4  | 9  | 14 | 9  | 0.991 | 0.979 | 1     | 1.011 | 0.97  | 0.982 | 0.998 | 8.66E-01 |
| cds.Camellia_sinensis.comp3307_2_c0_seq1_m.25537 | PREDICT<br>ED: protein TIC 40, chloroplastic isoform X1 [Vitis vinifera]             | 49.159 | 65.856 | 33   | 13 | 29 | 13 | 0.967 | 1.023 | 1.02  | 0.997 | 1.024 | 0.983 | 0.998 | 9.38E-01 |
| cds.Camellia_sinensis.comp3307_8_c0_seq1_m.10577 | PREDICT<br>ED: ABC transporter B family member 28 [Prunus mume]                      | 78.06  | 37.098 | 18.2 | 11 | 12 | 10 | 1.003 | 0.961 | 0.944 | 1.03  | 1.013 | 1.023 | 1.054 | 4.61E-02 |

|                                                  |                                                                                                       |        |        |      |    |    |    |       |       |       |       |       |       |       |          |
|--------------------------------------------------|-------------------------------------------------------------------------------------------------------|--------|--------|------|----|----|----|-------|-------|-------|-------|-------|-------|-------|----------|
| cds.Camellia_sinensis.comp3308_4_c4_seq1_m.45006 | PREDICTED:<br>nascent polypeptide-associated complex subunit alpha-like protein 1 [Elaeis guineensis] | 21.74  | 25.533 | 22.1 | 3  | 9  | 3  | 1.01  | 1.026 | 1.023 | 0.978 | 1.004 | 0.922 | 0.949 | 1.10E-01 |
| cds.Camellia_sinensis.comp3308_4_c5_seq1_m.15203 | PREDICTED: ATP synthase subunit beta, mitochondrial-like [Solanum pennellii]                          | 59.463 | 323.31 | 53.2 | 22 | 91 | 19 | 1.034 | 1.003 | 1.02  | 0.991 | 0.971 | 0.981 | 0.963 | 2.31E-02 |
| cds.Camellia_sinensis.comp3308_4_c5_seq2_m.50711 | PREDICTED: ATP synthase subunit beta, mitochondrial-like [Nicotiana attenuata]                        | 17.821 | 6.558  | 22.5 | 3  | 14 | 1  | 0.98  | 0.985 | 0.959 | 1.022 | 1.016 | 1.055 | 1.058 | 1.71E-02 |
| cds.Camellia_sinensis.comp3308_7_c0_seq1_m.7166  | PREDICTED: phospholipase D delta isoform X3 [Vitis vinifera]                                          | 97.908 | 13.033 | 10.2 | 8  | 9  | 8  | 0.907 | 0.899 | 0.961 | 1.077 | 1.069 | 1.012 | 1.141 | 9.94E-03 |

|                                |                   |                                                                                                    |        |        |      |   |   |   |       |       |       |       |       |       |       |          |
|--------------------------------|-------------------|----------------------------------------------------------------------------------------------------|--------|--------|------|---|---|---|-------|-------|-------|-------|-------|-------|-------|----------|
| cds.Camellia_sinensis.comp3309 | 2_c0_seq1_m.9775  | PREDICT<br>ED:<br>BEL1-like<br>homeodom<br>ain protein<br>1<br>[Sesamum<br>indicum]                | 72.048 | 11.451 | 4.8  | 3 | 4 | 2 | 0.962 | 0.952 | 0.93  | 1.091 | 1.047 | 1.042 | 1.118 | 3.22E-03 |
| cds.Camellia_sinensis.comp3309 | 4_c1_seq3_m.7239  |                                                                                                    | 18.899 | -2     | 4.1  | 1 | 2 | 1 | 0.986 | 0.93  | 1.021 | 0.972 | 1.037 | 1.068 | 1.048 | 2.98E-01 |
| cds.Camellia_sinensis.comp3309 | 6_c0_seq1_m.17329 | PREDICT<br>ED: dnaJ<br>protein<br>P58IPK<br>homolog<br>[Prunus<br>mume]                            | 53.241 | 8.4665 | 13.6 | 6 | 6 | 6 | 0.954 | 0.982 | 0.999 | 1.089 | 0.98  | 1.02  | 1.052 | 2.08E-01 |
| cds.Camellia_sinensis.comp3309 | 8_c0_seq1_m.2140  | PREDICT<br>ED: ABC<br>transporter<br>C family<br>member<br>14<br>[Juglans]                         | 164.88 | 28.019 | 6.4  | 8 | 9 | 7 | 1.115 | 1.088 | 1.181 | 0.829 | 0.87  | 0.89  | 0.765 | 1.12E-03 |
| cds.Camellia_sinensis.comp3310 | 4_c0_seq1_m.8567  | PREDICT<br>ED:<br>protein<br>CHUP1,<br>chloroplast<br>ic isoform<br>X1<br>[Gossypium<br>raimondii] | 33.717 | 12.278 | 24.8 | 7 | 9 | 7 | 1.083 | 1.064 | 1.072 | 0.913 | 0.911 | 0.943 | 0.86  | 2.44E-04 |



|                                |           |          |   |                                                                                                                  |        |        |      |    |    |    |       |       |       |       |       |       |       |          |
|--------------------------------|-----------|----------|---|------------------------------------------------------------------------------------------------------------------|--------|--------|------|----|----|----|-------|-------|-------|-------|-------|-------|-------|----------|
| cds.Camellia_sinensis.comp3310 | 9_c0_seq1 | 3_m.2907 | 3 | PREDICT<br>ED: CBS<br>domain-<br>containing<br>protein<br>CBSX2,<br>chloroplast<br>ic<br>[Eucalyptus<br>grandis] | 27.432 | 61.034 | 26.6 | 8  | 12 | 7  | 1.04  | 1.022 | 1.044 | 0.973 | 0.959 | 0.987 | 0.94  | 4.20E-03 |
| cds.Camellia_sinensis.comp3311 | 5_c0_seq1 | _m.14614 |   | PREDICT<br>ED:<br>monodehy<br>droascorba<br>te<br>reductase<br>5,<br>mitochond<br>rial<br>[Nelumbo<br>nucifera]  | 53.595 | 268.25 | 49.6 | 21 | 54 | 20 | 0.956 | 0.938 | 0.943 | 1.052 | 1.066 | 1.04  | 1.113 | 2.99E-04 |
| cds.Camellia_sinensis.comp3312 | 0_c0_seq2 | _m.23566 |   | PREDICT<br>ED:<br>FKBP12-<br>interacting<br>protein of<br>37 kDa<br>[Theobroma<br>cacao]                         | 38.799 | 5.7355 | 10.1 | 4  | 4  | 4  | 0.889 | 1.027 | 1.055 | 1.1   | 1.015 | 0.945 | 1.03  | 6.82E-01 |
| cds.Camellia_sinensis.comp3312 | 1_c0_seq1 | _m.12663 |   | PREDICT<br>ED: acyl-<br>CoA-<br>binding<br>domain-<br>containing<br>protein 4<br>[Vitis<br>vinifera]             | 55.599 | 46.401 | 15   | 7  | 10 | 7  | 1.071 | 1.086 | 1.042 | 0.971 | 0.896 | 0.928 | 0.874 | 6.70E-03 |

|                                                  |                                                                                    |        |        |      |   |   |   |       |       |       |       |       |       |       |          |
|--------------------------------------------------|------------------------------------------------------------------------------------|--------|--------|------|---|---|---|-------|-------|-------|-------|-------|-------|-------|----------|
|                                                  | PREDICT                                                                            |        |        |      |   |   |   |       |       |       |       |       |       |       |          |
|                                                  | ED:                                                                                |        |        |      |   |   |   |       |       |       |       |       |       |       |          |
| cds.Camellia_sinensis.comp3312_6_c0_seq1_m.36777 | monothiol glutaredoxin-S15, mitochondrial [Juglans regia]                          | 20.607 | 3.227  | 11.3 | 2 | 2 | 2 | 1.035 | 0.97  | 0.994 | 0.982 | 1.007 | 1.018 | 1.003 | 9.00E-01 |
|                                                  | PREDICT                                                                            |        |        |      |   |   |   |       |       |       |       |       |       |       |          |
|                                                  | ED:                                                                                |        |        |      |   |   |   |       |       |       |       |       |       |       |          |
|                                                  | probable sphingolipid transporter spinster homolog 2 isoform X2 [Theobroma cacao]  |        |        |      |   |   |   |       |       |       |       |       |       |       |          |
| cds.Camellia_sinensis.comp3312_8_c0_seq5_m.17158 |                                                                                    | 54.879 | 2.9318 | 3.3  | 2 | 2 | 2 | 1.019 | 1.135 | 0.965 | 0.91  | 0.98  | 0.984 | 0.921 | 2.12E-01 |
|                                                  | PREDICT                                                                            |        |        |      |   |   |   |       |       |       |       |       |       |       |          |
|                                                  | ED:                                                                                |        |        |      |   |   |   |       |       |       |       |       |       |       |          |
|                                                  | probable ADP-ribosylation factor GTPase-activating protein AGD8 [Ricinus communis] |        |        |      |   |   |   |       |       |       |       |       |       |       |          |
| cds.Camellia_sinensis.comp3313_3_c0_seq1_m.7963  |                                                                                    | 43.269 | 28.301 | 18.6 | 6 | 9 | 6 | 1.079 | 1.07  | 1.05  | 1.01  | 0.902 | 0.928 | 0.888 | 2.63E-02 |

|                                                   |                                                                   |        |        |      |   |    |   |       |       |       |       |       |       |       |          |
|---------------------------------------------------|-------------------------------------------------------------------|--------|--------|------|---|----|---|-------|-------|-------|-------|-------|-------|-------|----------|
|                                                   | PREDICT<br>ED: 50S                                                |        |        |      |   |    |   |       |       |       |       |       |       |       |          |
| cds.Camellia_sinensis.comp3313_3_c0_seq1_m.7964   | ribosomal protein L17, chloroplast ic-like<br>[Nicotiana tabacum] | 32.902 | 3.3185 | 7.1  | 2 | 2  | 2 | 1.034 | 1.208 | 1.094 | 0.858 | 0.932 | 0.853 | 0.792 | 1.25E-02 |
|                                                   | PREDICT<br>ED: YTH domain-                                        |        |        |      |   |    |   |       |       |       |       |       |       |       |          |
| cds.Camellia_sinensis.comp3313_4_c0_seq1_m.9785   | containing family protein 3-like isoform X1<br>[Juglans regia]    | 76.212 | 16.126 | 8.4  | 5 | 5  | 3 | 0.993 | 1.063 | 1.045 | 0.973 | 0.983 | 0.946 | 0.936 | 4.81E-02 |
| cds.Camellia_sinensis.comp3313_5_c1_seq1_m.2417_0 | Hop-interacting protein THI002<br>[Medicago truncatula]           | 41.36  | 1.4159 | 2.2  | 1 | 1  | 1 | 1.1   | 1.003 | 1.039 | 0.938 | 0.946 | 0.961 | 0.905 | 2.39E-02 |
|                                                   | PREDICT<br>ED: DNA damage-binding protein 1-like<br>[Ipomoea nil] |        |        |      |   |    |   |       |       |       |       |       |       |       |          |
| cds.Camellia_sinensis.comp3313_5_c1_seq6_m.3926   |                                                                   | 47.553 | 29.162 | 19.4 | 8 | 11 | 8 | 0.976 | 1.029 | 0.953 | 1.016 | 0.99  | 1.039 | 1.029 | 3.33E-01 |

|                                                 |                                                                                            |        |        |      |   |   |   |       |       |       |       |       |       |       |          |
|-------------------------------------------------|--------------------------------------------------------------------------------------------|--------|--------|------|---|---|---|-------|-------|-------|-------|-------|-------|-------|----------|
| cds.Camellia_sinensis.comp3313.5_c1_seq8_m.4460 | PREDICTED:<br>vacuolar-sorting receptor 1-like isoform X1<br>[Nelumbo nucifera]            | 56.842 | 1.5406 | 2.8  | 1 | 1 | 1 |       |       |       |       |       |       |       |          |
| cds.Camellia_sinensis.comp3313.5_c1_seq9_m.5256 | PREDICTED: DNA damage-binding protein 1 isoform X1 [Vitis vinifera]                        | 70.415 | 18.987 | 11.1 | 7 | 8 | 7 | 0.93  | 0.95  | 0.962 | 1.09  | 1.049 | 1.022 | 1.112 | 7.40E-03 |
| cds.Camellia_sinensis.comp3313.5_c1_seq9_m.5257 | PREDICTED:<br>ankyrin repeat and KH domain-containing protein R11A8.7<br>[Jatropha curcas] | 41.956 | 6.5535 | 5.3  | 1 | 1 | 1 |       |       |       |       |       |       |       |          |
| cds.Camellia_sinensis.comp3313.6_c0_seq1_m.635  | PREDICTED: E3 ubiquitin-protein ligase PRT6<br>[Vitis vinifera]                            | 231.72 | 2.1827 | 0.6  | 1 | 1 | 1 | 1.061 | 1.085 | 1.05  | 1.031 | 0.81  | 0.953 | 0.874 | 1.91E-01 |



|                                                  |                                                                                   |        |        |      |    |    |    |       |       |       |       |       |       |       |          |
|--------------------------------------------------|-----------------------------------------------------------------------------------|--------|--------|------|----|----|----|-------|-------|-------|-------|-------|-------|-------|----------|
|                                                  | PREDICT                                                                           |        |        |      |    |    |    |       |       |       |       |       |       |       |          |
|                                                  | ED:                                                                               |        |        |      |    |    |    |       |       |       |       |       |       |       |          |
| cds.Camellia_sinensis.comp3313_9_c0_seq1_m.9505  | calcium sensing receptor, chloroplast ic isoform X1 [Citrus sinensis]             | 38.973 | 59.77  | 20.1 | 7  | 17 | 7  | 1.022 | 1.006 | 1.016 | 0.997 | 0.98  | 0.997 | 0.977 | 3.40E-02 |
|                                                  | PREDICT                                                                           |        |        |      |    |    |    |       |       |       |       |       |       |       |          |
|                                                  | ED:                                                                               |        |        |      |    |    |    |       |       |       |       |       |       |       |          |
| cds.Camellia_sinensis.comp3313_9_c0_seq1_m.9506  | calcium sensing receptor, chloroplast ic isoform X2 [Citrus sinensis]             | 34.998 | 73.64  | 33.1 | 12 | 24 | 12 | 1.049 | 0.977 | 1.021 | 0.985 | 0.987 | 0.998 | 0.975 | 2.99E-01 |
|                                                  | PREDICT                                                                           |        |        |      |    |    |    |       |       |       |       |       |       |       |          |
|                                                  | ED:                                                                               |        |        |      |    |    |    |       |       |       |       |       |       |       |          |
| cds.Camellia_sinensis.comp3314_7_c0_seq4_m.18745 | mediator of RNA polymerase II transcription subunit 25 [Vitis vinifera]           | 30.668 | 3.4694 | 6.7  | 2  | 2  | 2  | 0.981 | 0.959 | 1     | 1.032 | 0.987 | 1.057 | 1.046 | 1.28E-01 |
|                                                  | PREDICT                                                                           |        |        |      |    |    |    |       |       |       |       |       |       |       |          |
|                                                  | ED:                                                                               |        |        |      |    |    |    |       |       |       |       |       |       |       |          |
| cds.Camellia_sinensis.comp3314_9_c0_seq1_m.7064  | calmodulin-binding receptor-like cytoplasmic kinase 3 isoform X1 [Vitis vinifera] | 51.687 | 2.0378 | 3.1  | 2  | 2  | 2  | 1.034 | 0.993 | 0.95  | 1.079 | 0.962 | 0.992 | 1.019 | 6.90E-01 |

|                                                 |                                                                                                      |        |        |      |    |    |    |       |       |       |       |       |       |       |          |
|-------------------------------------------------|------------------------------------------------------------------------------------------------------|--------|--------|------|----|----|----|-------|-------|-------|-------|-------|-------|-------|----------|
| cds.Camellia_sinensis.comp33150_c0_seq1_m.1236  | PREDICTED: UTP--glucose-1-phosphate uridylyltransferase 3, chloroplastic isoform X4 [Vitis vinifera] | 91.036 | 3.0028 | 2.6  | 1  | 1  | 1  | 0.867 | 0.984 | 0.983 | 0.912 | 1.14  | 1.142 | 1.127 | 2.48E-01 |
| cds.Camellia_sinensis.comp33153_c0_seq1_m.22690 | PREDICTED: phosphoribosylglycinamide cycloligase, chloroplastic/mitochondrial [Theobroma cacao]      | 49.847 | 73.465 | 12.3 | 6  | 9  | 6  | 1.019 | 0.993 | 1.014 | 1.003 | 0.997 | 1.005 | 0.993 | 4.51E-01 |
| cds.Camellia_sinensis.comp33156_c0_seq2_m.19418 | PREDICTED: probable ATP-dependent RNA helicase ddx5 [Vitis rotundifolia]                             | 48.589 | -2     | 2.3  | 1  | 1  | 1  | 1.045 | 0.968 | 0.966 | 1.012 | 1.011 | 1.005 | 1.016 | 5.80E-01 |
| cds.Camellia_sinensis.comp33158_c0_seq1_m.20871 | PREDICTED: selenium-binding protein 2 [Pyrus x bretschneideri]                                       | 54.503 | 185.29 | 30.7 | 13 | 40 | 13 | 0.878 | 0.871 | 0.844 | 1.131 | 1.16  | 1.124 | 1.317 | 5.90E-05 |

|                                                  |                                                                       |        |        |      |   |    |   |       |       |       |       |       |       |       |          |
|--------------------------------------------------|-----------------------------------------------------------------------|--------|--------|------|---|----|---|-------|-------|-------|-------|-------|-------|-------|----------|
|                                                  | PREDICT<br>ED:                                                        |        |        |      |   |    |   |       |       |       |       |       |       |       |          |
| cds.Camellia_sinensis.comp3315_8_c0_seq3_m.30038 | probable acyl-activating enzyme 16, chloroplastic [Vitis]             | 51.082 | 14.194 | 14.8 | 6 | 6  | 5 | 0.971 | 0.968 | 1.028 | 1.129 | 0.991 | 1.038 | 1.064 | 2.26E-01 |
|                                                  | PREDICT<br>ED:                                                        |        |        |      |   |    |   |       |       |       |       |       |       |       |          |
| cds.Camellia_sinensis.comp3315_8_c0_seq4_m.30027 | probable acyl-activating enzyme 16, chloroplastic isoform X2          | 38.012 | 25.331 | 15.4 | 5 | 6  | 5 | 0.956 | 1.002 | 0.916 | 1.05  | 1.082 | 1.045 | 1.105 | 2.31E-02 |
|                                                  | PREDICT<br>ED:                                                        |        |        |      |   |    |   |       |       |       |       |       |       |       |          |
| cds.Camellia_sinensis.comp3316_0_c0_seq1_m.1554  | symplekin isoform X1 [Nicotiana attenuata]                            | 147.23 | 1.4087 | 1    | 1 | 1  | 1 |       |       |       |       |       |       |       |          |
|                                                  | PREDICT<br>ED: plant UBX domain-containing protein 8 [Vitis vinifera] |        |        |      |   |    |   |       |       |       |       |       |       |       |          |
| cds.Camellia_sinensis.comp3316_0_c1_seq1_m.11786 | domain-containing protein 8 [Vitis vinifera]                          | 66.641 | 3.9894 | 15.8 | 9 | 12 | 2 | 0.986 | 1.08  | 1.096 | 0.897 | 0.964 | 0.973 | 0.896 | 5.98E-02 |

|                                                  |                                                                         |        |        |      |    |    |    |       |       |       |       |       |       |       |          |
|--------------------------------------------------|-------------------------------------------------------------------------|--------|--------|------|----|----|----|-------|-------|-------|-------|-------|-------|-------|----------|
| cds.Camellia_sinensis.comp33160_c1_seq2_m.16209  | PREDICT<br>ED: plant UBX domain-containing protein 8 [Vitis vinifera]   | 68.037 | 95.282 | 33.1 | 18 | 22 | 11 | 1.015 | 1.037 | 1.047 | 0.965 | 0.935 | 1.012 | 0.94  | 6.46E-02 |
| cds.Camellia_sinensis.comp33163_c0_seq1_m.21007  | PREDICT<br>ED: geraniol 8-hydroxylase-like [Nicotiana attenuata]        | 58.702 | 1.5689 | 2.1  | 1  | 1  | 1  | 0.862 | 0.991 | 0.88  | 1.171 | 1.199 | 0.95  | 1.215 | 8.98E-02 |
| cds.Camellia_sinensis.comp33165_c0_seq3_m.11874  | PREDICT<br>ED: protease Do-like 2, chloroplastic [Theobroma cacao]      | 69.038 | 38.773 | 19.5 | 10 | 12 | 10 | 1.063 | 1.067 | 1.041 | 0.963 | 0.953 | 0.938 | 0.9   | 6.23E-04 |
| cds.Camellia_sinensis.comp33167_c0_seq2_m.12525  | PREDICT<br>ED: malonate--CoA ligase isoform X2 [Vitis vinifera]         | 54.797 | 28.27  | 19.8 | 8  | 11 | 8  | 1.002 | 1.008 | 1.009 | 0.98  | 0.97  | 0.992 | 0.974 | 1.94E-02 |
| cds.Camellia_sinensis.comp33170_c0_seq11_m.16683 | PREDICT<br>ED: GDHB glutamate dehydrogenase isoform X1 [Vitis vinifera] | 43.292 | 154.4  | 50.6 | 17 | 34 | 13 | 0.978 | 0.959 | 0.993 | 1.033 | 1.029 | 1.043 | 1.06  | 5.88E-03 |

|                                                    |                                                                                                |        |        |      |   |   |   |       |       |       |       |       |       |       |          |
|----------------------------------------------------|------------------------------------------------------------------------------------------------|--------|--------|------|---|---|---|-------|-------|-------|-------|-------|-------|-------|----------|
|                                                    | PREDICT                                                                                        |        |        |      |   |   |   |       |       |       |       |       |       |       |          |
| cds.Camellia_sinensis.comp3317_0_c0_seq5_m.11453   | ED:<br>TOM1-like protein 2 [Ricinus communis]                                                  | 71.744 | 2.8349 | 2.6  | 2 | 2 | 2 | 1.059 | 0.913 | 1.053 | 1.006 | 0.997 | 0.977 | 0.985 | 8.09E-01 |
|                                                    | PREDICT                                                                                        |        |        |      |   |   |   |       |       |       |       |       |       |       |          |
| cds.Camellia_sinensis.comp3317_0_c0_seq6_m.11481   | ED:<br>protein XRI1 isoform X1 [Ziziphus jujuba]                                               | 26.516 | -2     | 4.2  | 1 | 1 | 1 | 1.054 | 0.964 | 1.113 | 0.932 | 0.969 | 0.963 | 0.915 | 1.15E-01 |
|                                                    | PREDICT                                                                                        |        |        |      |   |   |   |       |       |       |       |       |       |       |          |
| cds.Camellia_sinensis.comp3317_4_c2_seq17_m.4474_6 | ED:<br>protein phosphatase inhibitor 2 isoform X2 [Juglans regia]                              | 20.138 | 2.397  | 8.7  | 1 | 1 | 1 | 1.051 | 1.109 | 0.949 | 1.001 | 0.912 | 0.972 | 0.928 | 2.40E-01 |
|                                                    | PREDICT                                                                                        |        |        |      |   |   |   |       |       |       |       |       |       |       |          |
| cds.Camellia_sinensis.comp3317_6_c0_seq1_m.23980   | ED:<br>probable mitochondrial import inner membrane translocase subunit TIM21 [Vitis vinifera] | 34.672 | 7.7594 | 10.3 | 3 | 3 | 3 | 0.862 | 1.062 | 1.05  | 0.993 | 1.01  | 1.011 | 1.013 | 8.18E-01 |

|                                                 |                                                                                                                                                                                                                                                                 |        |        |      |    |    |    |       |       |       |       |       |       |       |          |
|-------------------------------------------------|-----------------------------------------------------------------------------------------------------------------------------------------------------------------------------------------------------------------------------------------------------------------|--------|--------|------|----|----|----|-------|-------|-------|-------|-------|-------|-------|----------|
| cds.Camellia_sinensis.comp33177_c0_seq1_m.33010 | isoflavone reductase-like protein [Cajanus cajan] PREDICTED: long chain acyl-CoA synthetase 6, peroxisomal-like isoform X1 [Nelumbo nucifera] PREDICTED: GTP-binding protein SAR1A-like [Juglans regia] PREDICTED: vicianin hydrolase-like [Populus euphratica] | 37.403 | 158.3  | 40.5 | 11 | 31 | 10 | 1.187 | 1.168 | 1.174 | 0.79  | 0.824 | 0.804 | 0.685 | 4.30E-06 |
| cds.Camellia_sinensis.comp33181_c0_seq1_m.4653  | 6, peroxisomal-like isoform X1 [Nelumbo nucifera] PREDICTED: GTP-binding protein SAR1A-like [Juglans regia] PREDICTED: vicianin hydrolase-like [Populus euphratica]                                                                                             | 19.538 | 1.4836 | 5.2  | 1  | 1  | 1  | 0.969 | 0.964 | 0.921 | 1.127 | 1.078 | 0.971 | 1.113 | 8.88E-02 |
| cds.Camellia_sinensis.comp33184_c0_seq4_m.35050 | isoflavone reductase-like protein [Cajanus cajan] PREDICTED: long chain acyl-CoA synthetase 6, peroxisomal-like isoform X1 [Nelumbo nucifera] PREDICTED: GTP-binding protein SAR1A-like [Juglans regia] PREDICTED: vicianin hydrolase-like [Populus euphratica] | 13.203 | 52.141 | 60   | 5  | 11 | 2  | 0.924 | 0.987 | 1.009 | 1.033 | 1.022 | 1.024 | 1.054 | 1.81E-01 |
| cds.Camellia_sinensis.comp33187_c0_seq2_m.48458 | isoflavone reductase-like protein [Cajanus cajan] PREDICTED: long chain acyl-CoA synthetase 6, peroxisomal-like isoform X1 [Nelumbo nucifera] PREDICTED: GTP-binding protein SAR1A-like [Juglans regia] PREDICTED: vicianin hydrolase-like [Populus euphratica] | 18.361 | 3.7707 | 14   | 2  | 2  | 2  | 1.122 | 1.085 | 0.995 | 0.972 | 0.883 | 0.923 | 0.868 | 3.53E-02 |

|                                                 |                                                                                          |        |        |      |   |    |   |       |       |       |       |       |       |       |          |
|-------------------------------------------------|------------------------------------------------------------------------------------------|--------|--------|------|---|----|---|-------|-------|-------|-------|-------|-------|-------|----------|
| cds.Camellia_sinensis.comp33194_c0_seq5_m.22855 | PREDICTED:<br>mannose-1-phosphate guanylyltransferase alpha<br>[Capsicum annuum]         | 45.754 | 12.245 | 10.1 | 4 | 4  | 3 | 1.039 | 1.066 | 0.956 | 1.016 | 0.863 | 1.057 | 0.959 | 5.62E-01 |
| cds.Camellia_sinensis.comp33196_c0_seq2_m.28361 | PREDICTED:<br>26S proteasome non-ATPase regulatory subunit 14 homolog<br>[Juglans regia] | 36.592 | 34.887 | 24.4 | 8 | 12 | 8 | 0.978 | 1.024 | 0.975 | 1.046 | 1.023 | 1.029 | 1.041 | 8.04E-02 |
| cds.Camellia_sinensis.comp33200_c0_seq1_m.32195 | PREDICTED:<br>protein FLX-like 3<br>[Vitis vinifera]                                     | 30.858 | 1.5811 | 16.8 | 4 | 5  | 2 | 0.891 | 0.983 | 1.099 | 0.981 | 1.084 | 0.987 | 1.027 | 6.96E-01 |
| cds.Camellia_sinensis.comp33200_c0_seq2_m.34220 | PREDICTED:<br>protein FLX-like 3 isoform X1<br>[Nicotiana tabacum]                       | 31.569 | 26.988 | 33.3 | 7 | 12 | 6 | 1.009 | 0.997 | 1.013 | 0.981 | 1.018 | 0.988 | 0.989 | 4.31E-01 |

|                                                 |                                                                                                                                     |        |        |      |    |    |    |       |       |       |       |       |       |       |          |
|-------------------------------------------------|-------------------------------------------------------------------------------------------------------------------------------------|--------|--------|------|----|----|----|-------|-------|-------|-------|-------|-------|-------|----------|
| cds.Camellia_sinensis.comp3321_0_c0_seq1_m.934  | PREDICT<br>ED:<br>protein argonaute 1-like<br>[Solanum tuberosum NADH dehydrogenase subunit 5 (mitochondrion)<br>[Nelumbo nucifera] | 111.95 | 108.01 | 20.5 | 19 | 25 | 19 | 1.05  | 1.065 | 1.048 | 0.947 | 0.929 | 0.95  | 0.893 | 1.99E-04 |
| cds.Camellia_sinensis.comp3321_1_c0_seq4_m.6750 | PREDICT<br>ED:<br>serine-rich adhesin for platelets isoform X2<br>[Prunus]                                                          | 65.746 | 2.6632 | 1.7  | 1  | 1  | 1  | 0.986 | 0.979 | 1.041 | 1.067 | 0.906 | 1.034 | 1     | 9.75E-01 |
| cds.Camellia_sinensis.comp3321_5_c0_seq1_m.532  | PREDICT<br>ED:<br>serine-rich adhesin for platelets isoform X2<br>[Theobroma cacao]                                                 | 232.61 | 4.0934 | 1.5  | 3  | 3  | 1  |       |       |       |       |       |       |       |          |
| cds.Camellia_sinensis.comp3321_5_c0_seq4_m.3227 | PREDICT<br>ED:<br>serine-rich adhesin for platelets isoform X2<br>[Theobroma cacao]                                                 | 123.77 | 14.409 | 3.2  | 3  | 3  | 1  |       |       |       |       |       |       |       |          |
| cds.Camellia_sinensis.comp3321_7_c0_seq2_m.9233 | PREDICT<br>ED: U-box domain-containing protein 44<br>[Jatropha curcas]                                                              | 71.843 | 13.476 | 5.9  | 4  | 4  | 4  | 1.039 | 0.989 | 1.005 | 0.979 | 1.016 | 0.975 | 0.979 | 3.44E-01 |





|                                                     |                                                                                   |        |        |      |    |    |    |       |       |       |       |       |       |       |          |
|-----------------------------------------------------|-----------------------------------------------------------------------------------|--------|--------|------|----|----|----|-------|-------|-------|-------|-------|-------|-------|----------|
| cds.Camellia_sinensis.comp3322_1_c2_seq1_m.12402    | PREDICTED:<br>protein IQ-DOMAIN 14<br>[Daucus carota subsp. sativus]              | 61.594 | 4.0248 | 1.8  | 1  | 1  | 1  | 1.202 | 1.077 | 0.998 | 0.853 | 0.849 | 0.98  | 0.818 | 4.94E-02 |
| cds.Camellia_sinensis.comp3322_3_c0_seq1_0_m.4839_0 | PREDICTED:<br>glycerol kinase<br>[Juglans regia]                                  | 21.665 | 23.946 | 14.9 | 3  | 5  | 3  | 0.899 | 0.974 | 0.952 | 1.094 | 1.061 | 1.098 | 1.152 | 5.68E-03 |
| cds.Camellia_sinensis.comp3322_4_c0_seq1_m.18045    | catalase isozyme 3<br>[Nicotiana tabacum]                                         | 62.315 | 236.63 | 42   | 21 | 77 | 14 | 0.994 | 0.976 | 1.006 | 0.997 | 1.032 | 0.999 | 1.017 | 2.92E-01 |
| cds.Camellia_sinensis.comp3322_4_c0_seq3_m.44552    | catalase family protein<br>[Populus trichocarpa]                                  | 22.173 | 4.6852 | 25.5 | 4  | 15 | 1  |       |       |       |       |       |       |       |          |
| cds.Camellia_sinensis.comp3322_7_c0_seq3_4_m.3621_1 | PREDICTED:<br>peptidyl-tRNA hydrolase ICT1, mitochondrial isoform X1<br>[Nelumbo] | 26.743 | 3.3688 | 4.6  | 1  | 1  | 1  | 1.139 | 1.068 | 1.172 | 0.845 | 0.851 | 0.89  | 0.765 | 1.12E-03 |

|                       |                                                                        |        |        |      |   |   |   |       |       |       |       |       |       |       |          |
|-----------------------|------------------------------------------------------------------------|--------|--------|------|---|---|---|-------|-------|-------|-------|-------|-------|-------|----------|
| PREDICT               |                                                                        |        |        |      |   |   |   |       |       |       |       |       |       |       |          |
| ED:                   |                                                                        |        |        |      |   |   |   |       |       |       |       |       |       |       |          |
| cds.Camellia_sinensis | mechanosensitive ion channel protein 1, mitochondrial [Vitis vinifera] | 59.262 | 2.6231 | 3    | 1 | 1 | 1 |       |       |       |       |       |       |       |          |
| PREDICT               |                                                                        |        |        |      |   |   |   |       |       |       |       |       |       |       |          |
| ED:                   |                                                                        |        |        |      |   |   |   |       |       |       |       |       |       |       |          |
| cds.Camellia_sinensis | trithorax group protein osa [Ziziphus jujuba]                          | 41.817 | 22.751 | 13.6 | 4 | 4 | 4 | 0.951 | 0.976 | 1.036 | 1.105 | 0.899 | 1.053 | 1.032 | 6.98E-01 |
| PREDICT               |                                                                        |        |        |      |   |   |   |       |       |       |       |       |       |       |          |
| ED:                   |                                                                        |        |        |      |   |   |   |       |       |       |       |       |       |       |          |
| cds.Camellia_sinensis | exocyst complex component SEC15B [Nelumbo nucifera]                    | 26.615 | 5.6746 | 10.1 | 2 | 2 | 2 | 0.97  | 0.956 | 1.003 | 1.027 | 1.101 | 0.964 | 1.056 | 2.66E-01 |
| PREDICT               |                                                                        |        |        |      |   |   |   |       |       |       |       |       |       |       |          |
| ED: 5'-               |                                                                        |        |        |      |   |   |   |       |       |       |       |       |       |       |          |
| cds.Camellia_sinensis | nucleotide domain-containing protein 4 isoform X4 [Vitis vinifera]     | 13.525 | 1.8736 | 6.2  | 1 | 1 | 1 | 0.904 | 1.249 | 0.895 | 0.952 | 0.962 | 1.044 | 0.97  | 8.79E-01 |







|                                |                   |                                                                                                   |        |        |      |   |   |   |       |       |       |       |       |       |       |          |
|--------------------------------|-------------------|---------------------------------------------------------------------------------------------------|--------|--------|------|---|---|---|-------|-------|-------|-------|-------|-------|-------|----------|
| cds.Camellia_sinensis.comp3324 | 9_c0_seq1_m.20076 | PREDICTED: LON peptidase N-terminal domain and RING finger protein 1 isoform X1 [Sesamum indicum] | 61.012 | -2     | 1.5  | 1 | 1 | 1 | 1.168 | 1.091 | 1.121 | 0.815 | 0.843 | 0.92  | 0.763 | 2.74E-03 |
| cds.Camellia_sinensis.comp3325 | 1_c0_seq1_m.12241 | PREDICTED: inorganic pyrophosphatase 3-like isoform X1 [Nicotiana attenuata]                      | 28.55  | 6.0627 | 12.4 | 3 | 3 | 3 |       |       |       |       |       |       |       |          |
| cds.Camellia_sinensis.comp3325 | 1_c0_seq9_m.52859 | long chain base biosynthesis protein 1 [Cajanus cajan]                                            | 12.25  | 2.9165 | 17.7 | 2 | 2 | 2 | 1.001 | 0.879 | 0.986 | 1.016 | 1.012 | 1.122 | 1.099 | 1.48E-01 |
| cds.Camellia_sinensis.comp3325 | 2_c0_seq1_m.35074 | PREDICTED: (+)-neomenthol dehydrogenase-like, partial [Juglans regia]                             | 29.037 | 31.462 | 24   | 6 | 7 | 6 | 0.963 | 0.937 | 0.952 | 1.049 | 1.038 | 1.071 | 1.107 | 1.10E-03 |





|                                                  |                                                                                  |        |        |      |   |    |   |       |       |       |       |       |       |       |          |
|--------------------------------------------------|----------------------------------------------------------------------------------|--------|--------|------|---|----|---|-------|-------|-------|-------|-------|-------|-------|----------|
| cds.Camellia_sinensis.comp3326_0_c0_seq3_m.36353 | PREDICTED:<br>protein RNA-directed DNA methylation 3 [Vitis vinifera]            | 36.461 | 3.0432 | 3.4  | 1 | 2  | 1 | 1.109 | 1.035 | 0.889 | 1.112 | 0.957 | 0.901 | 0.979 | 8.30E-01 |
| cds.Camellia_sinensis.comp3326_1_c2_seq1_m.16769 | PREDICTED:<br>metal transporter Nramp3-like [Nicotiana tomentosiformis]          | 56.252 | 1.4928 | 3.1  | 1 | 1  | 1 |       |       |       |       |       |       |       |          |
| cds.Camellia_sinensis.comp3326_2_c0_seq1_m.1290  | PREDICTED:<br>ABC transporter C family member 10-like [Nicotiana attenuata]      | 164.51 | 18.033 | 6.3  | 8 | 10 | 6 | 1.063 | 1.064 | 1.105 | 0.907 | 0.936 | 0.896 | 0.847 | 8.18E-04 |
| cds.Camellia_sinensis.comp3326_3_c0_seq1_m.1372  | PREDICTED:<br>AT-hook motif nuclear-localized protein 10-like [Nelumbo nucifera] | 34.272 | 31.241 | 10.4 | 3 | 4  | 3 | 0.964 | 1.018 | 0.951 | 1.019 | 0.987 | 1.073 | 1.05  | 2.05E-01 |

|                                                  |                                                                                                                    |        |        |      |    |    |    |       |       |       |       |       |       |       |          |
|--------------------------------------------------|--------------------------------------------------------------------------------------------------------------------|--------|--------|------|----|----|----|-------|-------|-------|-------|-------|-------|-------|----------|
|                                                  | PREDICT                                                                                                            |        |        |      |    |    |    |       |       |       |       |       |       |       |          |
|                                                  | ED:                                                                                                                |        |        |      |    |    |    |       |       |       |       |       |       |       |          |
| cds.Camellia_sinensis.comp3326_7_c1_seq4_m.44623 | ribosome biogenesis protein erb1 isoform X2 [Citrus sinensis]                                                      | 12.982 | 4.0755 | 27.4 | 2  | 2  | 2  | 1.24  | 1.164 | 1.115 | 0.763 | 0.827 | 0.831 | 0.688 | 8.39E-04 |
|                                                  | PREDICT                                                                                                            |        |        |      |    |    |    |       |       |       |       |       |       |       |          |
|                                                  | ED:                                                                                                                |        |        |      |    |    |    |       |       |       |       |       |       |       |          |
| cds.Camellia_sinensis.comp3326_9_c0_seq1_m.34486 | caffeoylshikimate esterase [Vitis vinifera]                                                                        | 36.689 | 6.186  | 6.6  | 2  | 3  | 2  | 1.085 | 1.01  | 1.148 | 0.887 | 0.899 | 0.952 | 0.844 | 1.72E-02 |
|                                                  | PREDICT                                                                                                            |        |        |      |    |    |    |       |       |       |       |       |       |       |          |
|                                                  | ED: V-type                                                                                                         |        |        |      |    |    |    |       |       |       |       |       |       |       |          |
| cds.Camellia_sinensis.comp3327_2_c0_seq1_m.18645 | proton ATPase subunit B2                                                                                           | 57.87  | 155.76 | 38.1 | 17 | 30 | 16 | 0.99  | 0.973 | 0.97  | 1.018 | 1.021 | 1.021 | 1.043 | 2.22E-02 |
|                                                  | PREDICT                                                                                                            |        |        |      |    |    |    |       |       |       |       |       |       |       |          |
|                                                  | ED:                                                                                                                |        |        |      |    |    |    |       |       |       |       |       |       |       |          |
|                                                  | serine/threonine protein phosphatase 2A 55 kDa regulatory subunit B beta isoform-like isoform X2 [Cicer arietinum] |        |        |      |    |    |    |       |       |       |       |       |       |       |          |
| cds.Camellia_sinensis.comp3327_5_c0_seq1_m.14084 | phosphatase 2A 55 kDa regulatory subunit B beta isoform-like isoform X2 [Cicer arietinum]                          | 60.795 | 13.436 | 9.2  | 5  | 6  | 5  | 0.974 | 1.03  | 1.003 | 0.946 | 1.017 | 0.977 | 0.978 | 4.39E-01 |

|                                                  |                                                                      |        |        |      |   |   |   |       |       |       |       |       |       |       |          |
|--------------------------------------------------|----------------------------------------------------------------------|--------|--------|------|---|---|---|-------|-------|-------|-------|-------|-------|-------|----------|
| cds.Camellia_sinensis.comp33278_c0_seq3_m.39726  | PREDICT ED: coatomer subunit delta [Vitis vinifera]                  | 12.178 | 3.5319 | 20.2 | 2 | 4 | 1 | 0.865 | 0.906 | 1.357 | 1.144 | 0.812 | 0.946 | 0.928 | 7.33E-01 |
| cds.Camellia_sinensis.comp33280_c0_seq1_m.9895   | PREDICT ED: nucleobase -ascorbate transporter 6 [Sesamum indicum]    | 57.668 | 3.98   | 2.5  | 1 | 4 | 1 |       |       |       |       |       |       |       |          |
| cds.Camellia_sinensis.comp33280_c0_seq2_m.11931  | PREDICT ED: nucleobase -ascorbate transporter 6 [Sesamum indicum]    | 57.58  | 18.925 | 7.7  | 4 | 5 | 4 | 0.988 | 0.969 | 0.967 | 1.004 | 1.045 | 1     | 1.043 | 5.59E-02 |
| cds.Camellia_sinensis.comp33289_c0_seq3_m.41555  | PREDICT ED: thioredoxin protein [Medicago truncatula]                | 27.874 | 6.0223 | 16   | 5 | 8 | 5 | 0.955 | 0.978 | 0.963 | 0.995 | 1.076 | 1.046 | 1.076 | 3.79E-02 |
| cds.Camellia_sinensis.comp33294_c0_seq29_m.26235 | PREDICT ED: dynamin-like protein ARC5 [Daucus carota subsp. sativus] | 49.426 | 3.0027 | 6.9  | 3 | 3 | 3 | 0.987 | 1.04  | 1.124 | 0.899 | 0.938 | 0.998 | 0.9   | 9.57E-02 |







|                                                  |                                                                                                 |        |        |      |    |    |    |       |       |       |       |       |       |       |          |
|--------------------------------------------------|-------------------------------------------------------------------------------------------------|--------|--------|------|----|----|----|-------|-------|-------|-------|-------|-------|-------|----------|
| cds.Camellia_sinensis.comp33310_c0_seq4_m.30096  | PREDICTED:<br>protein<br>CROWDED<br>D<br>NUCLEI<br>4-like<br>[Daucus carota subsp.]             | 39.101 | 4.0506 | 8.9  | 2  | 2  | 2  | 1.055 | 1.03  | 0.95  | 0.946 | 1.019 | 0.996 | 0.976 | 5.65E-01 |
| cds.Camellia_sinensis.comp33312_c0_seq23_m.20101 | PREDICTED:<br>ATP-dependent<br>6-phosphofructokinase<br>3-like<br>isoform X1<br>[Juglans regia] | 54.198 | 49.435 | 30.7 | 15 | 21 | 10 | 1.032 | 1.055 | 1.019 | 0.979 | 0.999 | 0.951 | 0.943 | 2.85E-02 |
| cds.Camellia_sinensis.comp33312_c0_seq3_m.6920   | PREDICTED:<br>putative<br>ion<br>channel<br>POLLUX-like 2<br>isoform X2<br>[Sesamum indicum]    | 56.638 | 3.8582 | 4    | 2  | 2  | 2  | 1.027 | 0.935 | 1.158 | 0.891 | 1.05  | 0.937 | 0.922 | 3.71E-01 |

|                            |                                                                                             |        |        |      |    |    |    |       |       |       |       |       |       |       |          |
|----------------------------|---------------------------------------------------------------------------------------------|--------|--------|------|----|----|----|-------|-------|-------|-------|-------|-------|-------|----------|
|                            | PREDICT                                                                                     |        |        |      |    |    |    |       |       |       |       |       |       |       |          |
|                            | ED:                                                                                         |        |        |      |    |    |    |       |       |       |       |       |       |       |          |
| cds.Camellia_sinensis      | putative ion channel                                                                        |        |        |      |    |    |    |       |       |       |       |       |       |       |          |
| .comp3331_2_c0_seq3_m.6921 | POLLUX-like 2 [Ziziphus jujuba]                                                             | 38.942 | 25.843 | 28.8 | 10 | 10 | 10 | 1.084 | 1.035 | 1.058 | 0.94  | 0.953 | 0.964 | 0.899 | 2.22E-03 |
|                            | PREDICT                                                                                     |        |        |      |    |    |    |       |       |       |       |       |       |       |          |
|                            | ED:                                                                                         |        |        |      |    |    |    |       |       |       |       |       |       |       |          |
| cds.Camellia_sinensis      | conserved oligomeric Golgi complex subunit 6                                                |        |        |      |    |    |    |       |       |       |       |       |       |       |          |
| .comp3331_3_c0_seq9_m.5082 | [Vitis vinifera]                                                                            | 56.639 | 6.6096 | 6.5  | 3  | 3  | 3  | 1.123 | 0.951 | 1.034 | 1.006 | 0.915 | 0.962 | 0.928 | 2.54E-01 |
|                            | PREDICT                                                                                     |        |        |      |    |    |    |       |       |       |       |       |       |       |          |
|                            | ED:                                                                                         |        |        |      |    |    |    |       |       |       |       |       |       |       |          |
|                            | probable ADP-ribosylation factor GTPase-activating protein AGD14 isoform X1 [Juglans regia] |        |        |      |    |    |    |       |       |       |       |       |       |       |          |
| cds.Camellia_sinensis      | probable ADP-ribosylation factor GTPase-activating protein AGD14 isoform X1 [Juglans regia] |        |        |      |    |    |    |       |       |       |       |       |       |       |          |
| .comp3331_5_c0_seq1_m.7168 |                                                                                             | 81.628 | 9.284  | 5.2  | 4  | 4  | 4  | 1.161 | 1.14  | 1.079 | 0.85  | 0.867 | 0.933 | 0.784 | 2.46E-03 |



|                                |                   |                                                                                                      |        |        |     |   |   |   |       |       |       |       |       |       |       |          |
|--------------------------------|-------------------|------------------------------------------------------------------------------------------------------|--------|--------|-----|---|---|---|-------|-------|-------|-------|-------|-------|-------|----------|
| cds.Camellia_sinensis.comp3331 | 8_c0_seq1_m.2110  | PREDICT ED:<br>calcium-transporting ATPase 10, plasma membrane -type isoform X1<br>[Sesamum indicum] | 118.25 | 4.4966 | 5.6 | 4 | 4 | 4 |       |       |       |       |       |       |       |          |
| cds.Camellia_sinensis.comp3332 | 0_c1_seq1_m.27826 | PREDICT ED:<br>methionine adenosyltransferase 2 subunit beta isoform X1<br>[Solanum pennellii]       | 35.571 | 9.3727 | 7.4 | 2 | 2 | 2 | 0.872 | 1.085 | 1.041 | 1.067 | 1.008 | 0.955 | 1.011 | 8.60E-01 |
| cds.Camellia_sinensis.comp3332 | 5_c0_seq1_m.21011 | PREDICT ED:<br>phospholipase A(1) LCAT3 isoform X2<br>[Theobroma cacao]                              | 50.15  | 14.466 | 6.1 | 3 | 3 | 3 | 0.981 | 0.993 | 1.031 | 0.991 | 1.003 | 1.012 | 1     | 9.76E-01 |



|                                                  |                                                                              |        |        |      |   |    |   |       |       |       |       |       |       |       |          |
|--------------------------------------------------|------------------------------------------------------------------------------|--------|--------|------|---|----|---|-------|-------|-------|-------|-------|-------|-------|----------|
| cds.Camellia_sinensis.comp3334_0_c0_seq2_m.5151  | PREDICTED: beta-galactosidase-like [Sesamum indicum]                         | 93.865 | 9.1505 | 5.9  | 5 | 6  | 3 | 0.827 | 0.932 | 0.833 | 1.135 | 1.213 | 1.17  | 1.357 | 2.08E-03 |
| cds.Camellia_sinensis.comp3334_5_c1_seq2_m.46861 | PREDICTED: hydroxymethylglutaryl-CoA lyase, mitochondrial isoform X3 [Vitis] | 20.699 | 1.5141 | 11.3 | 2 | 2  | 2 | 1.027 | 1.042 | 1.073 | 1     | 0.934 | 0.924 | 0.91  | 2.70E-02 |
| cds.Camellia_sinensis.comp3334_6_c0_seq2_m.36031 | PREDICTED: 60 kDa jasmonate-induced protein [Elaeis guineensis]              | 30.07  | 24.115 | 25   | 6 | 7  | 6 | 0.962 | 0.983 | 1.011 | 1.036 | 0.992 | 1.018 | 1.03  | 1.91E-01 |
| cds.Camellia_sinensis.comp3334_8_c2_seq1_m.10350 | PREDICTED: calmodulin-binding protein 60 B isoform X1 [Nicotiana attenuata]  | 72.24  | 24.092 | 13.1 | 9 | 11 | 7 | 0.99  | 1.051 | 1.114 | 0.992 | 0.862 | 0.968 | 0.894 | 1.11E-01 |

|                                                 |                                                                                                          |        |        |      |   |    |   |       |       |       |       |       |       |       |          |
|-------------------------------------------------|----------------------------------------------------------------------------------------------------------|--------|--------|------|---|----|---|-------|-------|-------|-------|-------|-------|-------|----------|
| cds.Camellia_sinensis.comp33352_c0_seq1_m.32981 | PREDICTED:<br>probable<br>CDP-diacylglycerol--inositol 3-phosphatidyltransferase 2<br>[Ricinus communis] | 30.807 | 1.3491 | 3    | 1 | 1  | 1 | 1.035 | 0.997 | 1.035 | 1.007 | 0.947 | 0.981 | 0.957 | 1.12E-01 |
| cds.Camellia_sinensis.comp33354_c0_seq1_m.13563 | PREDICTED: LOW<br>QUALITY<br>PROTEIN:<br>alkaline/neutral invertase<br>CINV2<br>[Sesamum indicum]        | 63.531 | 41.672 | 15.5 | 9 | 11 | 8 | 0.937 | 0.991 | 0.988 | 1.095 | 1.002 | 1.06  | 1.083 | 6.70E-02 |
| cds.Camellia_sinensis.comp33354_c0_seq2_m.25461 | PREDICTED: PTI1-like<br>tyrosine-kinase<br>At3g15890 [Prunus mume]                                       | 41.299 | 11.588 | 14.4 | 5 | 5  | 5 | 1.018 | 0.988 | 1.095 | 0.979 | 1.02  | 0.904 | 0.936 | 2.29E-01 |
| cds.Camellia_sinensis.comp33358_c0_seq1_m.2298  | PREDICTED: K(+)<br>efflux<br>antiporter 3,<br>chloroplastic [Vitis vinifera]                             | 54.334 | 21.849 | 14.8 | 6 | 6  | 6 | 1.013 | 1.05  | 1.025 | 0.999 | 1.008 | 0.91  | 0.945 | 1.67E-01 |



|                                                  |                                                                                     |        |        |      |    |    |    |       |       |       |       |       |       |       |          |
|--------------------------------------------------|-------------------------------------------------------------------------------------|--------|--------|------|----|----|----|-------|-------|-------|-------|-------|-------|-------|----------|
| cds.Camellia_sinensis.comp3337_1_c0_seq5_m.12685 | PREDICT<br>ED:<br>chaperonin 60 subunit beta 4, chloroplastic [Vitis vinifera]      | 55.331 | 18.182 | 14.1 | 7  | 8  | 7  | 1.06  | 1.054 | 1.027 | 0.943 | 0.949 | 0.987 | 0.917 | 7.22E-03 |
| cds.Camellia_sinensis.comp3337_3_c0_seq1_m.2756  | PREDICT<br>ED:<br>guanylate-binding protein 2 [Vitis vinifera]                      | 120.52 | 101.33 | 16.7 | 18 | 23 | 14 | 0.975 | 1.009 | 0.985 | 1.001 | 0.985 | 1.024 | 1.014 | 4.18E-01 |
| cds.Camellia_sinensis.comp3337_9_c1_seq5_m.17768 | PREDICT<br>ED: zinc finger CCCH domain-containing protein ZFN-like [Vitis vinifera] | 47.127 | 7.1706 | 6.2  | 3  | 4  | 3  | 0.993 | 1.039 | 0.977 | 1.018 | 0.978 | 1.004 | 0.997 | 9.04E-01 |
| cds.Camellia_sinensis.comp3337_9_c1_seq6_m.18136 | PREDICT<br>ED:<br>argininosuccinate synthase, chloroplastic [Ricinus communis]      | 28.882 | 1.8687 | 33.2 | 9  | 12 | 1  | 0.861 | 1.005 | 1.061 | 1.073 | 0.997 | 1.036 | 1.061 | 3.96E-01 |

|                                                  |                                                                                         |        |        |      |    |    |   |       |       |       |       |       |       |       |          |
|--------------------------------------------------|-----------------------------------------------------------------------------------------|--------|--------|------|----|----|---|-------|-------|-------|-------|-------|-------|-------|----------|
| cds.Camellia_sinensis.comp3337_9_c1_seq7_m.18340 | PREDICTED:<br>argininosuccinate synthase, chloroplastic isoform X1<br>[Theobroma cacao] | 57.7   | 162.29 | 37.3 | 21 | 35 | 6 | 0.969 | 1.002 | 0.958 | 1.046 | 0.989 | 0.987 | 1.032 | 2.53E-01 |
| cds.Camellia_sinensis.comp3337_9_c1_seq9_m.20280 | PREDICTED:<br>argininosuccinate synthase, chloroplastic<br>[Nelumbo nucifera]           | 22.693 | -2     | 31.2 | 8  | 12 | 1 |       |       |       |       |       |       |       |          |
| cds.Camellia_sinensis.comp3337_9_c3_seq1_m.20752 | PREDICTED:<br>4-coumarate-CoA ligase-like 9 isoform X1<br>[Lupinus angustifolius]       | 60.818 | 11.402 | 6.2  | 3  | 3  | 3 | 1.056 | 1.025 | 1.01  | 1.032 | 0.965 | 0.915 | 0.942 | 1.78E-01 |
| cds.Camellia_sinensis.comp3338_0_c0_seq5_m.5253  | PREDICTED:<br>eukaryotic translation initiation factor 4B1<br>[Solanum lycopersicum]    | 24.027 | 7.8008 | 3.9  | 1  | 1  | 1 | 1.257 | 1.248 | 1.287 | 0.725 | 0.714 | 0.692 | 0.562 | 2.03E-06 |





|                                                  |                                                                                  |        |        |      |   |   |   |       |       |       |       |       |       |       |          |
|--------------------------------------------------|----------------------------------------------------------------------------------|--------|--------|------|---|---|---|-------|-------|-------|-------|-------|-------|-------|----------|
|                                                  | PREDICT<br>ED:                                                                   |        |        |      |   |   |   |       |       |       |       |       |       |       |          |
| cds.Camellia_sinensis.comp3339_6_c0_seq2_m.31354 | conserved oligomeric Golgi complex subunit 5 [Nelumbonucifera]                   | 32.801 | 1.923  | 7    | 2 | 2 | 2 | 0.98  | 1.034 | 1.115 | 0.915 | 0.929 | 1.025 | 0.917 | 1.69E-01 |
| cds.Camellia_sinensis.comp3339_9_c0_seq6_m.16738 | PREDICT ED: CTP synthase [Prunumume] kinase family protein [Populus trichocarpa] | 53.507 | 1.7602 | 3.1  | 2 | 2 | 2 | 0.937 | 0.958 | 0.907 | 1.112 | 1.129 | 0.992 | 1.154 | 3.19E-02 |
| cds.Camellia_sinensis.comp3340_3_c4_seq3_m.15130 | PREDICT ED: probable serine/threonine-protein kinase At4g35230 [Ziziphus         | 56.939 | 31.333 | 15.3 | 6 | 8 | 4 | 0.945 | 0.996 | 0.954 | 1.049 | 1.051 | 0.998 | 1.07  | 4.44E-02 |
| cds.Camellia_sinensis.comp3340_3_c4_seq5_m.18825 | probable serine/threonine-protein kinase At4g35230 [Ziziphus                     | 56.334 | 10.209 | 14.6 | 6 | 7 | 3 | 0.918 | 0.941 | 0.895 | 1.144 | 1.08  | 1.062 | 1.193 | 2.76E-03 |





|                                                  |                                                                                 |        |        |      |    |    |    |       |       |       |       |       |       |      |          |
|--------------------------------------------------|---------------------------------------------------------------------------------|--------|--------|------|----|----|----|-------|-------|-------|-------|-------|-------|------|----------|
|                                                  | PREDICT                                                                         |        |        |      |    |    |    |       |       |       |       |       |       |      |          |
|                                                  | ED:                                                                             |        |        |      |    |    |    |       |       |       |       |       |       |      |          |
| cds.Camellia_sinensis.comp3341_2_c0_seq7_m.17502 | pyruvate kinase 1, cytosolic isoform X2<br>[Juglans regia]                      | 57.52  | 4.4895 | 34.7 | 17 | 33 | 0  |       |       |       |       |       |       |      |          |
|                                                  | PREDICT                                                                         |        |        |      |    |    |    |       |       |       |       |       |       |      |          |
|                                                  | ED:                                                                             |        |        |      |    |    |    |       |       |       |       |       |       |      |          |
| cds.Camellia_sinensis.comp3341_2_c0_seq9_m.18397 | pyruvate kinase 1, cytosolic-like<br>[Daucus carota subsp. sativus]             | 57.716 | 70.266 | 36.4 | 17 | 35 | 0  |       |       |       |       |       |       |      |          |
|                                                  | PREDICT                                                                         |        |        |      |    |    |    |       |       |       |       |       |       |      |          |
| cds.Camellia_sinensis.comp3342_4_c0_seq1_m.14287 | ED: beta-amylase 1, chloroplastic<br>[Sesamum indicum]                          | 64.58  | 39.285 | 12.7 | 6  | 6  | 6  | 0.968 | 0.96  | 1.014 | 1.039 | 1.039 | 1.01  | 1.05 | 6.69E-02 |
|                                                  | PREDICT                                                                         |        |        |      |    |    |    |       |       |       |       |       |       |      |          |
|                                                  | ED:                                                                             |        |        |      |    |    |    |       |       |       |       |       |       |      |          |
| cds.Camellia_sinensis.comp3343_7_c0_seq1_m.14754 | imidazole glycerol phosphate synthase hisHF, chloroplastic<br>[Sesamum indicum] | 63.537 | 88.875 | 27.1 | 13 | 15 | 13 | 0.988 | 1.014 | 0.973 | 1.01  | 0.981 | 1.014 | 1.01 | 5.62E-01 |

|                                                  |                                                                                 |        |        |      |    |    |    |       |       |       |       |       |       |       |          |
|--------------------------------------------------|---------------------------------------------------------------------------------|--------|--------|------|----|----|----|-------|-------|-------|-------|-------|-------|-------|----------|
|                                                  | PREDICT<br>ED:                                                                  |        |        |      |    |    |    |       |       |       |       |       |       |       |          |
| cds.Camellia_sinensis.comp3344_1_c0_seq4_m.29150 | photosynthetic NDH subunit of subcomplex B 1, chloroplastic [Juglans regia]     | 44.901 | 49.762 | 26.5 | 9  | 12 | 9  | 1.077 | 0.982 | 1.019 | 1.023 | 0.975 | 0.924 | 0.949 | 2.60E-01 |
|                                                  | PREDICT<br>ED:                                                                  |        |        |      |    |    |    |       |       |       |       |       |       |       |          |
| cds.Camellia_sinensis.comp3344_7_c0_seq1_m.22646 | protein TRIGALACTOSYL DIACYLGLYCEROL 4, chloroplastic [Vitis vinifera]          | 51.929 | 5.0868 | 3.6  | 2  | 2  | 2  |       |       |       |       |       |       |       |          |
|                                                  | PREDICT<br>ED:                                                                  |        |        |      |    |    |    |       |       |       |       |       |       |       |          |
| cds.Camellia_sinensis.comp3344_8_c0_seq1_m.9535  | NADH dehydrogenase [ubiquinone] flavoprotein 1, mitochondrial [Jatropha curcas] | 53.334 | 113.48 | 38.9 | 15 | 27 | 15 | 1.021 | 1.047 | 0.988 | 0.964 | 0.96  | 0.981 | 0.951 | 4.91E-02 |

|                                                  |                                                                                           |        |        |      |    |    |    |       |       |       |       |       |       |       |          |
|--------------------------------------------------|-------------------------------------------------------------------------------------------|--------|--------|------|----|----|----|-------|-------|-------|-------|-------|-------|-------|----------|
| cds.Camellia_sinensis.comp3344_8_c0_seq2_m.21505 | PREDICT<br>ED:<br>phosphoglucose<br>kinase,<br>cytosolic<br>[Vitis<br>vinifera]           | 42.607 | 114.92 | 58.7 | 24 | 94 | 17 | 0.975 | 0.94  | 0.946 | 1.055 | 1.063 | 1.054 | 1.109 | 8.78E-04 |
| cds.Camellia_sinensis.comp3345_1_c0_seq2_m.27864 | PREDICT<br>ED:<br>tryptophan<br>--tRNA<br>ligase,<br>cytoplasmic                          | 50.612 | 60.487 | 21.5 | 8  | 12 | 8  | 0.971 | 0.937 | 0.972 | 1.04  | 1.041 | 1.007 | 1.072 | 1.27E-02 |
| cds.Camellia_sinensis.comp3345_3_c0_seq1_m.2831  | [Ipomoea<br>PREDICT<br>ED:<br>importin-5-like<br>[Juglans<br>regia]                       | 123.52 | 106.96 | 12.4 | 12 | 17 | 9  | 1.066 | 1.021 | 1.024 | 0.962 | 0.969 | 0.965 | 0.931 | 3.67E-02 |
| cds.Camellia_sinensis.comp3345_3_c0_seq2_m.2999  | PREDICT<br>ED:<br>importin-5<br>[Beta<br>vulgaris<br>subsp.<br>vulgaris]                  | 123.51 | 29.723 | 6.3  | 7  | 9  | 4  | 1.03  | 0.865 | 1.154 | 0.823 | 0.996 | 1.126 | 0.966 | 7.86E-01 |
| cds.Camellia_sinensis.comp3345_9_c0_seq2_m.19681 | PREDICT<br>ED:<br>uncharacterized<br>membrane<br>protein<br>At1g75140 [Vitis<br>vinifera] | 63.594 | 1.2739 | 1.2  | 1  | 1  | 1  | 1.069 | 1.019 | 0.905 | 0.974 | 0.938 | 1.091 | 1.003 | 9.59E-01 |

|                                                  |                                                                                 |        |        |      |    |    |    |       |       |       |       |       |       |       |          |
|--------------------------------------------------|---------------------------------------------------------------------------------|--------|--------|------|----|----|----|-------|-------|-------|-------|-------|-------|-------|----------|
| cds.Camellia_sinensis.comp3346_0_c0_seq1_m.36440 | PREDICTED:<br>nicotinamide 1-like<br>[Juglans regia]                            | 27.077 | 24.661 | 18.4 | 4  | 7  | 4  | 0.956 | 1.043 | 1.025 | 0.968 | 1.011 | 1.044 | 1     | 9.98E-01 |
| cds.Camellia_sinensis.comp3346_5_c0_seq1_m.11018 | PREDICTED:<br>serine/threonine-protein kinase STY46-like<br>[Nicotiana tabacum] | 17.096 | 2.4822 | 16.9 | 2  | 2  | 2  |       |       |       |       |       |       |       |          |
| cds.Camellia_sinensis.comp3346_5_c0_seq3_m.12575 | PREDICTED:<br>serine/threonine-protein kinase STY46 isoform X1 [Vitis vinifera] | 62.76  | 1.7899 | 3.1  | 1  | 1  | 1  |       |       |       |       |       |       |       |          |
| cds.Camellia_sinensis.comp3346_7_c1_seq1_m.38838 | PREDICTED:<br>isoflavone reductase homolog<br>[Arachis ipaensis]                | 23.598 | 5.9644 | 9    | 2  | 3  | 1  | 0.947 | 0.993 | 1.052 | 0.967 | 1.068 | 0.989 | 1.011 | 8.16E-01 |
| cds.Camellia_sinensis.comp3346_9_c0_seq1_m.8798  | PREDICTED:<br>ED: nudix hydrolase 3 [Vitis vinifera]                            | 94.186 | 85.31  | 23.6 | 20 | 37 | 20 | 0.966 | 0.955 | 0.95  | 1.04  | 1.061 | 1.047 | 1.096 | 2.78E-04 |





|                                                  |                                                                                           |        |        |      |    |    |    |       |       |       |       |       |       |       |          |
|--------------------------------------------------|-------------------------------------------------------------------------------------------|--------|--------|------|----|----|----|-------|-------|-------|-------|-------|-------|-------|----------|
| cds.Camellia_sinensis.comp3347_3_c0_seq3_m.41971 | PREDICTED:<br>probable cinnamyl alcohol dehydrogenase 1<br>[Arachis duranensis]           | 29.866 | 22.196 | 17.7 | 5  | 12 | 5  | 0.929 | 0.856 | 0.919 | 1.096 | 1.104 | 1.072 | 1.21  | 2.14E-03 |
| cds.Camellia_sinensis.comp3347_3_c1_seq1_m.11925 | PREDICTED:<br>actin-interacting protein 1-2-like<br>[Nicotiana attenuata]                 | 66.021 | 51.651 | 23.8 | 13 | 17 | 13 | 0.977 | 0.949 | 0.964 | 1.051 | 1.036 | 1.017 | 1.074 | 4.92E-03 |
| cds.Camellia_sinensis.comp3347_5_c0_seq1_m.5850  | PREDICTED:<br>proteinaceous RNase P 1,<br>chloroplastic/mitochondrial<br>[Vitis vinifera] | 98.504 | -2     | 1    | 1  | 1  | 1  | 0.921 | 0.871 | 0.929 | 1.094 | 1.13  | 1.096 | 1.22  | 9.40E-04 |
| cds.Camellia_sinensis.comp3347_6_c0_seq3_m.1571  | Kinesin-like protein KIF15<br>[Morus notabilis]                                           | 134.78 | 1.4591 | 0.9  | 1  | 1  | 1  | 1.093 | 1.009 | 1.145 | 0.906 | 0.947 | 0.884 | 0.843 | 1.56E-02 |
| cds.Camellia_sinensis.comp3347_7_c1_seq1_m.14299 | RasGAP-activating-like protein 1<br>[Morus notabilis]                                     | 71.92  | 1.4804 | 2.3  | 2  | 2  | 2  | 1.007 | 1.097 | 0.998 | 0.964 | 1.031 | 0.905 | 0.935 | 2.32E-01 |



|                                                     |                                                                      |        |        |      |    |    |   |       |       |       |       |       |       |       |          |
|-----------------------------------------------------|----------------------------------------------------------------------|--------|--------|------|----|----|---|-------|-------|-------|-------|-------|-------|-------|----------|
|                                                     | PREDICT                                                              |        |        |      |    |    |   |       |       |       |       |       |       |       |          |
|                                                     | ED:                                                                  |        |        |      |    |    |   |       |       |       |       |       |       |       |          |
| cds.Camellia_sinensis.comp3349_5_c0_seq1_m.32618    | riboflavin biosynthesis protein PYRD, chloroplastic [Vitis vinifera] | 27.785 | 2.3948 | 4    | 1  | 1  | 1 | 1.006 | 0.992 | 1.043 | 0.963 | 0.893 | 1.103 | 0.973 | 6.52E-01 |
|                                                     | PREDICT                                                              |        |        |      |    |    |   |       |       |       |       |       |       |       |          |
|                                                     | ED:                                                                  |        |        |      |    |    |   |       |       |       |       |       |       |       |          |
| cds.Camellia_sinensis.comp3349_5_c0_seq1_m.32619    | riboflavin biosynthesis protein PYRD, chloroplastic [Juglans regia]  | 13.994 | 2.8471 | 16.2 | 2  | 2  | 2 |       |       |       |       |       |       |       |          |
|                                                     | PREDICT                                                              |        |        |      |    |    |   |       |       |       |       |       |       |       |          |
|                                                     | ED:                                                                  |        |        |      |    |    |   |       |       |       |       |       |       |       |          |
| cds.Camellia_sinensis.comp3349_8_c0_seq1_0_m.4984_1 | pleiotropic drug resistance protein 2-like [Gossypium hirsutum]      | 21.25  | 2.4554 | 21.2 | 4  | 4  | 2 | 1.085 | 0.984 | 0.989 | 0.946 | 1.034 | 0.958 | 0.961 | 3.99E-01 |
|                                                     | PREDICT                                                              |        |        |      |    |    |   |       |       |       |       |       |       |       |          |
|                                                     | ED:                                                                  |        |        |      |    |    |   |       |       |       |       |       |       |       |          |
| cds.Camellia_sinensis.comp3350_2_c0_seq1_0_m.7346   | protein ROOT HAIR DEFECTIVE 3 homolog 2 [Jatropha curcas]            | 92.627 | 28.688 | 12.3 | 10 | 11 | 9 | 0.987 | 1     | 1.058 | 0.999 | 0.93  | 0.987 | 0.958 | 2.31E-01 |

|                                                     |                                                                                               |        |        |     |   |   |   |       |       |       |       |       |       |       |          |
|-----------------------------------------------------|-----------------------------------------------------------------------------------------------|--------|--------|-----|---|---|---|-------|-------|-------|-------|-------|-------|-------|----------|
| cds.Camellia_sinensis.comp3350_2_c0_seq1_8_m.3929_6 | PREDICT<br>ED: sugar carrier protein C-like [Ipomoea nil]                                     | 29.706 | 1.1983 | 5.3 | 2 | 3 | 1 | 0.964 | 0.961 | 0.975 | 1.074 | 0.983 | 1.065 | 1.077 | 1.25E-01 |
| cds.Camellia_sinensis.comp3350_2_c0_seq4_m.3342     | PREDICT<br>ED: sugar carrier protein C-like [Ipomoea nil]                                     | 57.517 | 9.2049 | 7.7 | 4 | 5 | 3 | 1.039 | 0.992 | 1.006 | 0.91  | 1.005 | 1.046 | 0.975 | 5.71E-01 |
| cds.Camellia_sinensis.comp3350_2_c0_seq4_m.3343     | PREDICT<br>ED:<br>fructokinase-like 1, chloroplast ic [Gossypium raimondii]                   | 56.656 | 4.6011 | 9.7 | 4 | 4 | 4 |       |       |       |       |       |       |       |          |
| cds.Camellia_sinensis.comp3350_2_c0_seq8_m.7124     | ROOT<br>HAIR<br>DEFECTIVE 3-like [Cajanus cajan]                                              | 57.917 | 2.7256 | 3.6 | 2 | 3 | 1 | 0.992 | 1.005 | 1.009 | 1.044 | 0.937 | 1.024 | 1     | 9.71E-01 |
| cds.Camellia_sinensis.comp3350_5_c0_seq1_m.522      | PREDICT<br>ED:<br>trafficking protein particle complex subunit 13 isoform X1 [Vitis vinifera] | 49.836 | 1.814  | 3.8 | 2 | 2 | 2 | 1.018 | 1.017 | 1.083 | 0.94  | 0.911 | 1.026 | 0.923 | 1.20E-01 |

|                                                  |                                                                                                      |        |        |      |   |    |   |       |       |       |       |       |       |       |          |
|--------------------------------------------------|------------------------------------------------------------------------------------------------------|--------|--------|------|---|----|---|-------|-------|-------|-------|-------|-------|-------|----------|
| cds.Camellia_sinensis.comp3350_6_c1_seq1_m.16384 | PREDICTED:<br>dihydrolyoyl dehydrogenase 2, chloroplast ic-like isoform X2<br>[Nicotiana tabacum]    | 59.902 | 10.661 | 10.4 | 6 | 7  | 1 |       |       |       |       |       |       |       |          |
| cds.Camellia_sinensis.comp3350_6_c1_seq2_m.23251 | PREDICTED:<br>3-isopropyl malate dehydrogenase, chloroplast ic isoform X2<br>[Sesamum indicum]       | 41.541 | 100.08 | 27.2 | 9 | 20 | 5 | 1.001 | 0.976 | 0.97  | 1.043 | 0.981 | 1.049 | 1.043 | 1.52E-01 |
| cds.Camellia_sinensis.comp3350_6_c1_seq5_m.38168 | PREDICTED:<br>isocitrate dehydrogenase [NAD] catalytic subunit 5, mitochondrial<br>[Jatropha curcas] | 16.264 | 41.319 | 19.1 | 3 | 5  | 2 | 0.962 | 0.937 | 0.943 | 1.038 | 1.049 | 1.077 | 1.113 | 1.38E-03 |

|                                |                      |                                                                                     |        |        |      |    |    |    |       |       |       |       |       |       |       |          |
|--------------------------------|----------------------|-------------------------------------------------------------------------------------|--------|--------|------|----|----|----|-------|-------|-------|-------|-------|-------|-------|----------|
| cds.Camellia_sinensis.comp3350 | 6_c1_seq8_m.53720    | PREDICTED: 3-isopropyl malate dehydrogenase, chloroplastic-like [Erythraea guttata] | 16.733 | 13.354 | 40.7 | 4  | 9  | 1  | 0.937 | 0.834 | 0.931 | 1.038 | 1.055 | 1.237 | 1.232 | 3.73E-02 |
| cds.Camellia_sinensis.comp3351 | 5_c0_seq1_m.9639     | PREDICTED: QUIRKY-like [Nicotiana tabacum]                                          | 88.969 | 22.857 | 6.2  | 5  | 6  | 5  | 0.958 | 1.026 | 1.043 | 1.072 | 0.931 | 0.986 | 0.987 | 7.93E-01 |
| cds.Camellia_sinensis.comp3351 | 5_c1_seq1_3_m.3068_5 | PREDICTED: cytochrome P450 CYP72A219-like isoform X2 [Juglans regia]                | 45.166 | 7.1653 | 2.8  | 1  | 1  | 1  | 0.858 | 0.865 | 0.967 | 1.145 | 1.058 | 1.157 | 1.249 | 9.54E-03 |
| cds.Camellia_sinensis.comp3351 | 6_c0_seq1_m.500      | vacuolar protein sorting protein [Medicago truncatula]                              | 277.54 | 37.559 | 5.6  | 12 | 12 | 12 | 0.9   | 0.996 | 0.951 | 1.011 | 1.068 | 1.032 | 1.093 | 5.55E-02 |
| cds.Camellia_sinensis.comp3351 | 6_c0_seq2_m.904      | vacuolar protein sorting protein [Medicago truncatula]                              | 209.64 | 4.0715 | 2.2  | 4  | 6  | 4  | 0.977 | 1.004 | 1.046 | 1.041 | 0.995 | 1.011 | 1.007 | 7.90E-01 |

|                                                 |                                                                                                                      |        |        |      |    |     |    |       |       |       |       |       |       |       |          |
|-------------------------------------------------|----------------------------------------------------------------------------------------------------------------------|--------|--------|------|----|-----|----|-------|-------|-------|-------|-------|-------|-------|----------|
| cds.Camellia_sinensis.comp33518_c0_seq1_m.16947 | PREDICT                                                                                                              |        |        |      |    |     |    |       |       |       |       |       |       |       |          |
|                                                 | ED:<br>ribulose<br>biphosphate<br>carboxylase/oxygenase<br>activase,<br>chloroplastic isoform<br>X1 [Vitis vinifera] | 52.007 | 323.31 | 64.6 | 28 | 229 | 5  | 1.055 | 1.015 | 1.014 | 0.99  | 1.008 | 0.951 | 0.956 | 1.06E-01 |
| cds.Camellia_sinensis.comp33518_c0_seq2_m.16961 | PREDICT                                                                                                              |        |        |      |    |     |    |       |       |       |       |       |       |       |          |
|                                                 | ED:<br>ribulose<br>biphosphate<br>carboxylase/oxygenase<br>activase,<br>chloroplastic isoform<br>X1 [Vitis vinifera] | 52.182 | 104.4  | 62.7 | 27 | 222 | 0  |       |       |       |       |       |       |       |          |
| cds.Camellia_sinensis.comp33518_c0_seq3_m.18225 | PREDICT                                                                                                              |        |        |      |    |     |    |       |       |       |       |       |       |       |          |
|                                                 | ED:<br>ribulose<br>biphosphate<br>carboxylase/oxygenase<br>activase,<br>chloroplastic [Vitis vinifera]               | 52.204 | 193.73 | 56.1 | 25 | 170 | 11 | 1.039 | 1.012 | 1.023 | 0.967 | 0.99  | 0.973 | 0.953 | 9.90E-03 |









|                                                  |                                                                                |        |        |      |   |    |   |       |       |       |       |       |       |       |          |
|--------------------------------------------------|--------------------------------------------------------------------------------|--------|--------|------|---|----|---|-------|-------|-------|-------|-------|-------|-------|----------|
| cds.Camellia_sinensis.comp33553_c0_seq10_m.22919 | PREDICTED: gluconokinase isoform X2 [Citrus sinensis]                          | 42.295 | 33.831 | 19.1 | 6 | 7  | 6 | 0.92  | 1.018 | 0.94  | 1.085 | 1.043 | 1.037 | 1.1   | 4.76E-02 |
| cds.Camellia_sinensis.comp33554_c0_seq2_m.16296  | PREDICTED: FGGY carbohydrate kinase domain-containing protein [Vitis vinifera] | 66.651 | 30.546 | 13.6 | 8 | 13 | 8 | 0.935 | 0.978 | 0.967 | 1.033 | 1.025 | 0.996 | 1.06  | 2.83E-02 |
| cds.Camellia_sinensis.comp33556_c0_seq1_m.6069   | PREDICTED: lon protease homolog 2, peroxisomal [Vitis                          | 98.253 | 3.0766 | 2.6  | 2 | 2  | 2 |       |       |       |       |       |       |       |          |
| cds.Camellia_sinensis.comp33558_c0_seq5_m.35964  | PREDICTED: syntaxin-51-like [Sesamum indicum]                                  | 25.715 | 30.448 | 29.2 | 8 | 14 | 8 | 0.961 | 1.005 | 0.974 | 1.027 | 1.027 | 1.003 | 1.04  | 6.42E-02 |
| cds.Camellia_sinensis.comp33558_c3_seq1_m.40063  | PREDICTED: thioredoxin O2, mitochondrial [Sesamum indicum]                     | 16.298 | 15.794 | 22.6 | 3 | 6  | 3 | 1.037 | 1.037 | 1.118 | 0.927 | 0.887 | 0.984 | 0.877 | 2.80E-02 |

|                                                    |                                                                  |        |        |      |    |    |    |       |       |       |       |       |       |       |          |
|----------------------------------------------------|------------------------------------------------------------------|--------|--------|------|----|----|----|-------|-------|-------|-------|-------|-------|-------|----------|
| cds.Camellia_sinensis.comp3356_1_c1_seq1_m.5928    | PREDICTED:<br>nuclear pore complex protein NUP1 [Vitis vinifera] | 70.092 | 1.4038 | 2.6  | 2  | 2  | 2  | 1.106 | 1.026 | 1.008 | 0.998 | 0.895 | 0.956 | 0.907 | 8.40E-02 |
| cds.Camellia_sinensis.comp3356_2_c0_seq8_m.5046    | PREDICTED:<br>riboflavin synthase [Vitis vinifera]               | 30.636 | 63.606 | 39.1 | 8  | 13 | 8  | 1.056 | 0.971 | 0.984 | 0.938 | 0.998 | 0.997 | 0.974 | 4.77E-01 |
| cds.Camellia_sinensis.comp3356_7_c0_seq4_m.25188   | transmembrane protein, putative [Medicago truncatula]            | 35.594 | 10.409 | 6.9  | 2  | 2  | 2  | 1.019 | 1.188 | 1.001 | 0.867 | 0.953 | 0.957 | 0.866 | 8.75E-02 |
| cds.Camellia_sinensis.comp3356_8_c0_seq10_m.4851_8 | PREDICTED:<br>cysteine synthase isoform X1 [Glycine max]         | 15.483 | 6.5529 | 13   | 2  | 4  | 1  | 1.075 | 1.277 | 1.072 | 0.881 | 0.816 | 0.846 | 0.743 | 8.94E-03 |
| cds.Camellia_sinensis.comp3356_8_c0_seq4_m.28856   | PREDICTED:<br>cysteine synthase isoform X1 [Glycine max]         | 40.437 | 74.078 | 38.2 | 12 | 28 | 10 | 1.009 | 1.007 | 1     | 0.983 | 1.025 | 0.997 | 0.996 | 7.78E-01 |

|                                |                                                                                                               |        |        |      |    |    |    |       |       |       |       |       |       |       |          |
|--------------------------------|---------------------------------------------------------------------------------------------------------------|--------|--------|------|----|----|----|-------|-------|-------|-------|-------|-------|-------|----------|
| cds.Camellia_sinensis.comp3357 | PREDICT<br>ED:<br>adenylosucinate lyase<br>[Theobroma cacao]                                                  | 14.693 | 15.167 | 31.3 | 4  | 6  | 2  | 1.002 | 1.008 | 1.049 | 0.932 | 1     | 1.012 | 0.962 | 2.58E-01 |
| cds.Camellia_sinensis.comp3357 | PREDICT<br>ED:<br>adenylosucinate lyase<br>[Theobroma cacao]                                                  | 61.638 | 43.604 | 22.3 | 12 | 17 | 10 | 0.992 | 0.964 | 1.022 | 1.034 | 1.003 | 1.032 | 1.031 | 1.96E-01 |
| cds.Camellia_sinensis.comp3357 | PREDICT<br>ED:<br>chlorophyllide b reductase<br>NOL, chloroplast isoform X1<br>[Populus euphratica]           | 36.34  | 10.424 | 19.5 | 6  | 7  | 6  | 0.98  | 0.983 | 0.97  | 0.999 | 1.052 | 1.031 | 1.051 | 3.39E-02 |
| cds.Camellia_sinensis.comp3357 | PREDICT<br>ED:<br>serine/threonine protein phosphatase 2A regulatory subunit B"beta-like<br>[Sesamum indicum] | 61.941 | 46.756 | 14.9 | 6  | 8  | 6  | 1.03  | 0.977 | 0.93  | 1.024 | 1.031 | 1.018 | 1.046 | 2.61E-01 |

|                                |                    |                                                                                                                   |        |        |      |    |    |    |       |       |       |       |       |       |       |          |
|--------------------------------|--------------------|-------------------------------------------------------------------------------------------------------------------|--------|--------|------|----|----|----|-------|-------|-------|-------|-------|-------|-------|----------|
| cds.Camellia_sinensis.comp3357 | 9_c0_seq9_m.18067  | PREDICT<br>ED:<br>phosphoinositide phospholipase C 2<br>[Vitis vinifera]                                          | 68.055 | 54.331 | 26.3 | 16 | 29 | 16 | 0.953 | 0.97  | 0.959 | 1.033 | 1.04  | 1.022 | 1.074 | 6.00E-04 |
| cds.Camellia_sinensis.comp3357 | 9_c1_seq1_m.50294  | PREDICT<br>ED: 14-3-3-like protein GF14 kappa<br>[Nelumbo nucifera]                                               | 21.135 | 90.547 | 54.8 | 11 | 31 | 8  | 0.964 | 0.974 | 0.908 | 1.056 | 1.07  | 1.087 | 1.129 | 6.54E-03 |
| cds.Camellia_sinensis.comp3358 | 2_c0_seq6_m.35475  | PREDICT<br>ED:<br>putative 4-hydroxy-tetrahydrodipicolinate reductase 3,<br>chloroplastic<br>[Populus euphratica] | 17.41  | 12.795 | 36.2 | 4  | 4  | 4  | 0.94  | 1.024 | 1.031 | 1.016 | 0.954 | 1.05  | 1.008 | 8.47E-01 |
| cds.Camellia_sinensis.comp3358 | 3_c0_seq17_m.28135 | PREDICT<br>ED:<br>splicing factor 3A subunit 2-like<br>[Nicotiana glauca]                                         | 38.298 | 47.905 | 16   | 5  | 8  | 5  | 1.004 | 1.023 | 0.994 | 0.982 | 0.998 | 1.01  | 0.99  | 4.29E-01 |



|                                                     |                                                                                                            |        |        |      |    |    |   |       |       |       |       |       |       |       |          |
|-----------------------------------------------------|------------------------------------------------------------------------------------------------------------|--------|--------|------|----|----|---|-------|-------|-------|-------|-------|-------|-------|----------|
| cds.Camellia_sinensis.comp3359_6_c1_seq1_6_m.3660_4 | PREDICTED:<br>epidermal growth factor receptor substrate 15-like isoform X2<br>[Nicotiana tomentosiformis] | 27.017 | 5.7515 | 12.2 | 2  | 2  | 2 | 1.068 | 1.119 | 0.983 | 0.874 | 1.017 | 0.924 | 0.888 | 1.10E-01 |
| cds.Camellia_sinensis.comp3359_6_c1_seq1_m.3182     | PREDICTED:<br>epidermal growth factor receptor substrate 15-like 1<br>[Solanum tuberosum]                  | 113.82 | 6.2309 | 8.2  | 8  | 8  | 6 | 1.038 | 1.119 | 1.092 | 0.939 | 0.936 | 0.864 | 0.843 | 8.20E-03 |
| cds.Camellia_sinensis.comp3359_6_c1_seq2_m.6425     | PREDICTED:<br>epidermal growth factor receptor substrate 15-like<br>[Nelumbo nucifera]                     | 90.117 | 12.65  | 9.7  | 10 | 10 | 8 | 1.069 | 1.08  | 1.092 | 0.864 | 0.969 | 0.912 | 0.847 | 7.70E-03 |



|                                                                                         |                    |        |        |      |   |    |   |       |       |       |       |       |       |       |          |
|-----------------------------------------------------------------------------------------|--------------------|--------|--------|------|---|----|---|-------|-------|-------|-------|-------|-------|-------|----------|
| cds.Camellia_sinensis.comp3359                                                          | 9_c0_seq1_m.28484  | 40.638 | 5.4752 | 12   | 4 | 4  | 4 | 1.134 | 0.879 | 0.979 | 1.153 | 1.002 | 0.863 | 1.009 | 9.52E-01 |
| PREDICTED:<br>mitochondrial import receptor subunit TOM40-1-like<br>[Nicotiana tabacum] |                    |        |        |      |   |    |   |       |       |       |       |       |       |       |          |
| cds.Camellia_sinensis.comp3359                                                          | 9_c1_seq1_m.4302_9 | 14.658 | 6.2367 | 25   | 5 | 15 | 2 | 1.193 | 1.245 | 1.316 | 0.749 | 0.739 | 0.704 | 0.584 | 9.72E-05 |
| PREDICTED:<br>histone H2AX<br>[Citrus sinensis]                                         |                    |        |        |      |   |    |   |       |       |       |       |       |       |       |          |
| cds.Camellia_sinensis.comp3360                                                          | 4_c0_seq4_m.28246  | 45.026 | 26.945 | 13.6 | 5 | 6  | 5 | 0.969 | 1.075 | 1.013 | 1.044 | 0.85  | 1.056 | 0.965 | 6.33E-01 |
| PREDICTED:<br>ubiquitin carboxyl-terminal hydrolase 6<br>[Vitis vinifera]               |                    |        |        |      |   |    |   |       |       |       |       |       |       |       |          |
| cds.Camellia_sinensis.comp3360                                                          | 5_c0_seq1_m.3591_9 | 31.234 | 56.243 | 33.8 | 8 | 20 | 5 | 0.934 | 0.895 | 0.869 | 1.095 | 1.117 | 1.122 | 1.236 | 6.78E-04 |
| PREDICTED:<br>glutathione S-transferase L3-like isoform X1<br>[Nicotiana tabacum]       |                    |        |        |      |   |    |   |       |       |       |       |       |       |       |          |

|                                                  |                                                                               |        |        |      |    |    |    |       |       |       |       |       |       |       |          |
|--------------------------------------------------|-------------------------------------------------------------------------------|--------|--------|------|----|----|----|-------|-------|-------|-------|-------|-------|-------|----------|
| PREDICTED:                                       |                                                                               |        |        |      |    |    |    |       |       |       |       |       |       |       |          |
| cds.Camellia_sinensis.comp3360_5_c0_seq4_m.13858 | eukaryotic translation initiation factor 3 subunit H [Vitis vinifera]         | 38.617 | 60.538 | 21.1 | 6  | 6  | 6  | 0.974 | 0.962 | 0.986 | 1.045 | 1.036 | 1.018 | 1.061 | 4.96E-03 |
| PREDICTED:                                       |                                                                               |        |        |      |    |    |    |       |       |       |       |       |       |       |          |
| cds.Camellia_sinensis.comp3360_5_c0_seq6_m.24251 | glutathione S-transferase L3 [Vitis vinifera]                                 | 27.424 | 182.85 | 56.1 | 14 | 46 | 12 | 0.902 | 0.887 | 0.904 | 1.117 | 1.145 | 1.125 | 1.258 | 1.87E-05 |
| PREDICTED:                                       |                                                                               |        |        |      |    |    |    |       |       |       |       |       |       |       |          |
| cds.Camellia_sinensis.comp3360_6_c0_seq1_m.24840 | probable indole-3-acetic acid-amido synthetase GH3.6 [Juglans regia]          | 58.518 | 6.0999 | 7.1  | 3  | 3  | 3  | 0.841 | 0.973 | 0.996 | 1.005 | 1.129 | 1.093 | 1.148 | 9.14E-02 |
| PREDICTED:                                       |                                                                               |        |        |      |    |    |    |       |       |       |       |       |       |       |          |
| cds.Camellia_sinensis.comp3361_1_c0_seq1_m.11426 | glycerol-3-phosphate dehydrogenase SDP6, mitochondrial-like [Sesamum indicum] | 71.729 | 96.499 | 20.3 | 12 | 16 | 12 | 0.987 | 0.986 | 0.986 | 1.047 | 1.006 | 1.008 | 1.034 | 1.22E-01 |



|                                                                                                                                                                           |                   |        |        |      |   |    |   |       |       |       |       |       |       |       |          |
|---------------------------------------------------------------------------------------------------------------------------------------------------------------------------|-------------------|--------|--------|------|---|----|---|-------|-------|-------|-------|-------|-------|-------|----------|
| cds.Camellia_sinensis.comp3361                                                                                                                                            | 7_c0_seq3_m.36051 | 17.546 | 5.5301 | 10.2 | 1 | 1  | 1 |       |       |       |       |       |       |       |          |
| PREDICTED:<br>hippocampus<br>abundant transcript-like protein 1 isoform X3<br>[Nicotiana tabacum]<br>esterase/lipase/thioesterase family protein<br>[Populus trichocarpa] |                   |        |        |      |   |    |   |       |       |       |       |       |       |       |          |
| cds.Camellia_sinensis.comp3362                                                                                                                                            | 2_c1_seq1_m.39647 | 24.368 | 16.259 | 32.4 | 7 | 10 | 7 | 0.973 | 1.004 | 1.003 | 1.029 | 1.025 | 0.956 | 1.01  | 7.32E-01 |
| PREDICTED: RNA-binding protein 1 isoform X1<br>[Vitis vinifera]                                                                                                           |                   |        |        |      |   |    |   |       |       |       |       |       |       |       |          |
| cds.Camellia_sinensis.comp3362                                                                                                                                            | 3_c0_seq1_m.17480 | 24.198 | 43.399 | 21.6 | 4 | 9  | 4 | 1.001 | 1.031 | 1.027 | 0.938 | 0.94  | 0.944 | 0.923 | 1.04E-03 |
| PREDICTED: NAD-dependent malic enzyme 62 kDa isoform, mitochondrial<br>[Jatropha curcas]                                                                                  |                   |        |        |      |   |    |   |       |       |       |       |       |       |       |          |
| cds.Camellia_sinensis.comp3362                                                                                                                                            | 4_c0_seq1_m.49384 | 15.224 | 1.5362 | 49.6 | 6 | 17 | 1 | 0.957 | 0.958 | 0.995 | 1.037 | 1.069 | 1.007 | 1.07  | 3.51E-02 |

|                                                  |                                                                                                    |        |        |      |    |    |    |       |       |       |       |       |       |       |          |
|--------------------------------------------------|----------------------------------------------------------------------------------------------------|--------|--------|------|----|----|----|-------|-------|-------|-------|-------|-------|-------|----------|
| cds.Camellia_sinensis.comp3362_4_c0_seq1_m.8477  | PREDICT<br>ED:<br>ubiquitin receptor<br>RAD23c<br>[Vitis vinifera]                                 | 40.93  | 14.004 | 24.6 | 7  | 15 | 3  | 1     | 1.031 | 0.987 | 1.029 | 0.987 | 0.957 | 0.985 | 5.69E-01 |
| cds.Camellia_sinensis.comp3362_4_c0_seq2_m.10448 | PREDICT<br>ED: NAD-dependent<br>malic enzyme 62 kDa<br>isoform, mitochondrial<br>[Jatropha curcas] | 69.135 | 63.189 | 26.8 | 15 | 28 | 10 | 1.002 | 0.973 | 1.035 | 1.001 | 0.963 | 0.989 | 0.981 | 4.22E-01 |
| cds.Camellia_sinensis.comp3362_5_c1_seq1_m.31691 | PREDICT<br>ED:<br>NADH-cytochrome b5 reductase-like protein<br>[Nelumbo nucifera]                  | 36.397 | 38.217 | 23.4 | 9  | 17 | 9  | 1.033 | 1.002 | 0.979 | 0.998 | 1.001 | 0.996 | 0.994 | 7.34E-01 |
| cds.Camellia_sinensis.comp3362_5_c2_seq4_m.19700 | PREDICT<br>ED:<br>protein LST8 homolog isoform X1<br>[Sesamum indicum]                             | 19.682 | 3.066  | 10.9 | 2  | 2  | 2  | 0.98  | 0.992 | 0.937 | 1.127 | 0.968 | 1.018 | 1.07  | 2.41E-01 |



|                                |                                                                                     |        |        |      |   |    |   |       |       |       |       |       |       |       |          |
|--------------------------------|-------------------------------------------------------------------------------------|--------|--------|------|---|----|---|-------|-------|-------|-------|-------|-------|-------|----------|
| cds.Camellia_sinensis.comp3364 | PREDICT<br>ED:<br>ethylene-insensitive protein 2 [Vitis vinifera]                   | 141.7  | 2.5473 | 1.5  | 2 | 2  | 2 | 1.005 | 1.157 | 0.98  | 0.94  | 0.986 | 0.928 | 0.908 | 1.63E-01 |
| cds.Camellia_sinensis.comp3365 | PREDICT<br>ED:<br>protein LYK5 [Vitis vinifera]                                     | 75.823 | 3.4138 | 3    | 2 | 2  | 2 | 1.046 | 1.084 | 0.978 | 0.892 | 0.988 | 1.001 | 0.927 | 1.82E-01 |
| cds.Camellia_sinensis.comp3365 | PREDICT<br>ED:<br>ferritin-3, chloroplast ic [Theobroma cacao]                      | 30.802 | 78.547 | 34.3 | 9 | 24 | 8 | 0.851 | 0.853 | 0.872 | 1.126 | 1.196 | 1.144 | 1.345 | 1.16E-04 |
| cds.Camellia_sinensis.comp3365 | PREDICT<br>ED:<br>probable protein phosphatase 2C 11 isoform X2 [Nicotiana tabacum] | 31.382 | 51.334 | 29.1 | 7 | 8  | 5 | 0.961 | 1.051 | 0.955 | 1.07  | 0.937 | 1.068 | 1.036 | 5.52E-01 |
| cds.Camellia_sinensis.comp3365 | PREDICT<br>ED:<br>glycylpeptide N-tetradecanoyltransferase 1-like [Jatropha curcas] | 33.858 | 14.953 | 10.1 | 3 | 5  | 3 | 0.934 | 1.002 | 0.941 | 1.038 | 1.072 | 1.056 | 1.1   | 1.64E-02 |





|                                                          |                                                                |        |        |      |    |    |       |       |       |       |       |       |       |          |          |
|----------------------------------------------------------|----------------------------------------------------------------|--------|--------|------|----|----|-------|-------|-------|-------|-------|-------|-------|----------|----------|
| PREDICT                                                  |                                                                |        |        |      |    |    |       |       |       |       |       |       |       |          |          |
| ED:                                                      |                                                                |        |        |      |    |    |       |       |       |       |       |       |       |          |          |
| cds.Camellia_sinensis.comp3366_6_c0_seq1_m.13386         | serine/threonine-protein phosphatase BSL1 [Vitis vinifera]     | 71.364 | 13.607 | 11.1 | 7  | 7  | 1     | 0.961 | 1.007 | 1.021 | 1.035 | 0.988 | 1.004 | 1.013    | 6.06E-01 |
| PREDICT                                                  |                                                                |        |        |      |    |    |       |       |       |       |       |       |       |          |          |
| ED:                                                      |                                                                |        |        |      |    |    |       |       |       |       |       |       |       |          |          |
| cds.Camellia_sinensis.comp3366_6_c0_seq2_m.13614         | serine/threonine-protein phosphatase BSL1 [Vitis vinifera]     | 71.134 | 33.019 | 12.8 | 8  | 8  | 2     | 1.024 | 0.979 | 0.963 | 1.002 | 1.026 | 1.015 | 1.026    | 2.56E-01 |
| PREDICT                                                  |                                                                |        |        |      |    |    |       |       |       |       |       |       |       |          |          |
| ED: T-complex protein 1 subunit gamma [Nelumbo nucifera] |                                                                |        |        |      |    |    |       |       |       |       |       |       |       |          |          |
| cds.Camellia_sinensis.comp3366_8_c0_seq2_m.14633         | 60.595                                                         | 85.649 | 41.7   | 23   | 36 | 23 | 0.917 | 0.935 | 0.95  | 1.042 | 1.083 | 1.053 | 1.134 | 1.22E-03 |          |
| PREDICT                                                  |                                                                |        |        |      |    |    |       |       |       |       |       |       |       |          |          |
| ED:                                                      |                                                                |        |        |      |    |    |       |       |       |       |       |       |       |          |          |
| cds.Camellia_sinensis.comp3367_2_c0_seq1_m.4477          | puromycin-sensitive aminopeptidase isoform X1 [Vitis vinifera] | 111.03 | 323.31 | 42.5 | 38 | 71 | 33    | 0.996 | 0.999 | 1.014 | 1.006 | 1.017 | 1.005 | 1.006    | 4.01E-01 |



|                       |                                           |        |        |      |    |    |   |       |       |       |       |       |       |       |          |
|-----------------------|-------------------------------------------|--------|--------|------|----|----|---|-------|-------|-------|-------|-------|-------|-------|----------|
| PREDICT               |                                           |        |        |      |    |    |   |       |       |       |       |       |       |       |          |
| ED:                   |                                           |        |        |      |    |    |   |       |       |       |       |       |       |       |          |
| cds.Camellia_sinensis | probable glutathione S-transferase        | 24.87  | 48.903 | 36.5 | 10 | 21 | 5 | 0.984 | 0.948 | 0.942 | 1.047 | 1.071 | 1.049 | 1.102 | 3.24E-03 |
| .comp3367_7_c0_seq1   | [Gossypium raimondii]                     |        |        |      |    |    |   |       |       |       |       |       |       |       |          |
| PREDICT               |                                           |        |        |      |    |    |   |       |       |       |       |       |       |       |          |
| ED:                   |                                           |        |        |      |    |    |   |       |       |       |       |       |       |       |          |
| cds.Camellia_sinensis | probable glutathione S-transferase        | 24.968 | 2.0858 | 7.2  | 2  | 3  | 1 | 0.95  | 0.865 | 0.984 | 1.095 | 1.21  | 0.936 | 1.158 | 1.65E-01 |
| .comp3367_7_c0_seq3   | [Gossypium raimondii]                     |        |        |      |    |    |   |       |       |       |       |       |       |       |          |
| PREDICT               |                                           |        |        |      |    |    |   |       |       |       |       |       |       |       |          |
| ED:                   |                                           |        |        |      |    |    |   |       |       |       |       |       |       |       |          |
| cds.Camellia_sinensis | protein transport protein SEC13 homolog B | 32.584 | 48.755 | 25.6 | 6  | 10 | 4 | 0.906 | 1.013 | 0.99  | 1.023 | 1.055 | 1.025 | 1.067 | 1.38E-01 |
| .comp3367_9_c0_seq1   | [Vitis vinifera]                          |        |        |      |    |    |   |       |       |       |       |       |       |       |          |
| PREDICT               |                                           |        |        |      |    |    |   |       |       |       |       |       |       |       |          |
| ED:                   |                                           |        |        |      |    |    |   |       |       |       |       |       |       |       |          |
| cds.Camellia_sinensis | DEAD-box ATP-dependent RNA helicase 8     | 51.714 | 22.726 | 19.5 | 8  | 11 | 3 | 0.984 | 0.985 | 0.97  | 1     | 1.014 | 1.031 | 1.036 | 2.50E-02 |
| .comp3368_0_c1_seq1   | [Vitis vinifera]                          |        |        |      |    |    |   |       |       |       |       |       |       |       |          |

|                                                  |                                                                                           |        |        |      |    |    |    |       |       |       |       |       |       |       |          |
|--------------------------------------------------|-------------------------------------------------------------------------------------------|--------|--------|------|----|----|----|-------|-------|-------|-------|-------|-------|-------|----------|
| cds.Camellia_sinensis.comp3368_0_c2_seq3_m.23462 | PREDICT<br>ED: 26S<br>proteasome non-ATPase regulatory subunit 4 homolog [Vitis vinifera] | 44.876 | 70.859 | 27.2 | 8  | 15 | 8  | 1.022 | 1.022 | 0.992 | 1.007 | 0.947 | 1.035 | 0.985 | 5.95E-01 |
| cds.Camellia_sinensis.comp3368_5_c0_seq1_m.434   | PREDICT<br>ED:<br>MAG2-interacting protein 2 isoform X1 [Vitis vinifera]                  | 274.48 | 1.1904 | 0.4  | 1  | 1  | 1  |       |       |       |       |       |       |       |          |
| cds.Camellia_sinensis.comp3369_0_c0_seq1_m.25763 | PREDICT<br>ED: 40S ribosomal protein S4-like [Ziziphus jujuba]                            | 29.877 | 119.54 | 53   | 14 | 30 | 10 | 1.147 | 1.13  | 1.143 | 0.84  | 0.875 | 0.846 | 0.749 | 2.35E-05 |
| cds.Camellia_sinensis.comp3369_1_c0_seq1_m.1922  | PREDICT<br>ED: cullin-associated NEDD8-dissociated protein 1 [Vitis vinifera]             | 134.6  | 7.3362 | 4.4  | 5  | 5  | 5  | 0.976 | 1.015 | 1.053 | 0.968 | 0.939 | 1.055 | 0.973 | 5.33E-01 |



|                                                  |                                                                                                |        |        |      |    |    |    |       |       |       |       |       |       |       |          |
|--------------------------------------------------|------------------------------------------------------------------------------------------------|--------|--------|------|----|----|----|-------|-------|-------|-------|-------|-------|-------|----------|
| cds.Camellia_sinensis.comp3370_2_c0_seq2_m.7924  | PREDICTED:<br>uncharacterized TPR repeat-containing protein<br>At1g05150-like<br>[Ipomoea nil] | 90.324 | 22.367 | 9.3  | 7  | 9  | 7  | 0.988 | 1.029 | 1.051 | 0.953 | 0.963 | 0.975 | 0.942 | 3.75E-02 |
| cds.Camellia_sinensis.comp3370_2_c0_seq3_m.51726 | PREDICTED:<br>cyprosin-like<br>[Nicotiana attenuata]                                           | 12.418 | 1.8133 | 8    | 1  | 2  | 1  | 1.071 | 1.147 | 1.079 | 0.926 | 0.882 | 0.875 | 0.814 | 1.82E-03 |
| cds.Camellia_sinensis.comp3370_5_c2_seq1_m.6268  | PREDICTED:<br>L-arabinokinase-like<br>[Gossypium arboreum]<br>DNA-directed                     | 110.46 | 68.209 | 11.8 | 11 | 11 | 11 | 0.921 | 0.961 | 0.914 | 1.093 | 1.077 | 1.015 | 1.139 | 9.10E-03 |
| cds.Camellia_sinensis.comp3370_7_c0_seq1_m.23833 | RNA polymerase subunit alpha<br>[Arabidopsis thaliana]                                         | 46.089 | 55.689 | 20.5 | 7  | 8  | 7  | 0.991 | 1.031 | 1.008 | 1.002 | 0.988 | 0.993 | 0.984 | 2.72E-01 |

|                                                     |                                                                                             |        |        |      |    |    |    |       |       |       |       |       |       |       |          |
|-----------------------------------------------------|---------------------------------------------------------------------------------------------|--------|--------|------|----|----|----|-------|-------|-------|-------|-------|-------|-------|----------|
| cds.Camellia_sinensis.comp3371_1_c1_seq1_1_m.4042_3 | PREDICT<br>ED: DNA-directed RNA polymerase V subunit 7 [Vitis]                              | 20.286 | 3.8428 | 14   | 2  | 2  | 2  | 0.941 | 0.966 | 0.98  | 1.052 | 1.054 | 1.033 | 1.087 | 3.44E-03 |
| cds.Camellia_sinensis.comp3371_1_c1_seq2_m.23785    | PREDICT<br>ED: methionine aminopeptidase 2B isoform X2 [Vitis vinifera]                     | 32.046 | 1.9604 | 6.2  | 2  | 2  | 2  | 1.076 | 1.059 | 1.101 | 0.919 | 0.938 | 0.893 | 0.85  | 8.61E-04 |
| cds.Camellia_sinensis.comp3371_4_c0_seq4_m.5479     | PREDICT<br>ED: probable NOT transcription complex subunit VIP2 isoform X1 [Theobroma cacao] | 70.871 | 3.2544 | 3.3  | 2  | 2  | 2  | 0.947 | 0.966 | 0.963 | 1.059 | 1.02  | 1.069 | 1.095 | 4.44E-03 |
| cds.Camellia_sinensis.comp3371_7_c0_seq1_m.15910    | PREDICT<br>ED: 3-ketoacyl-CoA thiolase 2, peroxisomal isoform X1 [Erythranthe guttata]      | 54.836 | 135.52 | 32.2 | 14 | 29 | 12 | 1.011 | 0.972 | 1.003 | 1.017 | 1.006 | 1.032 | 1.023 | 1.79E-01 |

|                                                  |                                                                                                                              |        |        |      |   |    |   |       |       |       |       |       |       |       |          |
|--------------------------------------------------|------------------------------------------------------------------------------------------------------------------------------|--------|--------|------|---|----|---|-------|-------|-------|-------|-------|-------|-------|----------|
| cds.Camellia_sinensis.comp33718_c0_seq2_m.8004   | PREDICTED:<br>protein transport protein SEC23 [Vitis vinifera]                                                               | 84.491 | 43.856 | 12.6 | 8 | 16 | 7 | 0.969 | 0.951 | 0.981 | 1.013 | 1.031 | 1.042 | 1.064 | 7.18E-03 |
| cds.Camellia_sinensis.comp33727_c0_seq39_m.19053 | aminopeptidase (DUF3754) [Arabidopsis thaliana]                                                                              | 41.023 | 8.1704 | 7.3  | 3 | 3  | 3 | 1.03  | 1.007 | 1.078 | 0.993 | 0.972 | 0.922 | 0.927 | 6.30E-02 |
| cds.Camellia_sinensis.comp33729_c0_seq2_m.7772   | PREDICTED:<br>uncharacterized aarF domain-containing protein kinase At1g79600, chloroplastic isoform X2[Gossypium raimondii] | 64.802 | 1.2861 | 1.7  | 1 | 1  | 1 | 1.045 | 1.042 | 0.965 | 1.074 | 0.945 | 0.936 | 0.968 | 5.49E-01 |
| cds.Camellia_sinensis.comp33730_c0_seq16_m.33689 | PREDICTED:<br>acetyl-CoA acetyltransferase, cytosolic 1-like [Nicotiana attenuata]                                           | 30.582 | 23.631 | 23.4 | 5 | 8  | 5 | 0.984 | 0.983 | 1.072 | 0.986 | 1.006 | 1.074 | 1.009 | 8.27E-01 |



|                                                  |                                                                               |        |        |      |   |   |   |       |       |       |       |       |       |       |          |
|--------------------------------------------------|-------------------------------------------------------------------------------|--------|--------|------|---|---|---|-------|-------|-------|-------|-------|-------|-------|----------|
|                                                  | PREDICT<br>ED:                                                                |        |        |      |   |   |   |       |       |       |       |       |       |       |          |
| cds.Camellia_sinensis.comp3373_0_c0_seq3_m.22338 | uroporphyrinogen decarboxylase 1, chloroplastic [Vitis vinifera]              | 46.487 | 8.6837 | 9.5  | 4 | 8 | 4 | 0.998 | 0.98  | 1.023 | 1.041 | 0.968 | 0.959 | 0.989 | 7.08E-01 |
|                                                  | PREDICT<br>ED:                                                                |        |        |      |   |   |   |       |       |       |       |       |       |       |          |
| cds.Camellia_sinensis.comp3373_0_c0_seq7_m.25290 | acetyl-CoA acetyltransferase, cytosolic 1-like isoform X2 [Nelumbo nucifera]  | 23.859 | 24.556 | 30.5 | 5 | 9 | 5 | 0.987 | 0.934 | 0.978 | 0.993 | 1.056 | 1.032 | 1.063 | 6.99E-02 |
|                                                  | PREDICT<br>ED:                                                                |        |        |      |   |   |   |       |       |       |       |       |       |       |          |
| cds.Camellia_sinensis.comp3373_0_c1_seq1_m.45250 | acetyl-CoA acetyltransferase, cytosolic 1 isoform X1 [Pyrus x bretschneideri] | 18.638 | 52.128 | 32.4 | 5 | 7 | 1 | 0.99  | 1.047 | 1.031 | 0.962 | 1.007 | 0.968 | 0.957 | 1.19E-01 |



|                                                 |                                                                                  |        |        |      |    |    |    |       |       |       |       |       |       |       |          |
|-------------------------------------------------|----------------------------------------------------------------------------------|--------|--------|------|----|----|----|-------|-------|-------|-------|-------|-------|-------|----------|
| cds.Camellia_sinensis.comp33736_c0_seq1_m.12198 | PREDICTED: ATP-citrate synthase beta chain protein 2-like [Gossypium hirsutum]   | 65.798 | 162.57 | 41.3 | 21 | 39 | 21 | 1.071 | 1.085 | 1.08  | 0.948 | 0.937 | 0.919 | 0.867 | 1.24E-04 |
| cds.Camellia_sinensis.comp33739_c0_seq1_m.15479 | PREDICTED: protein PHOSPHATE STARVATION RESPONSE 1 isoform X2 [Nelumbo nucifera] | 54.187 | 3.5745 | 6.5  | 3  | 3  | 3  | 1.038 | 1.024 | 0.838 | 0.965 | 1.071 | 1.071 | 1.071 | 4.03E-01 |
| cds.Camellia_sinensis.comp33740_c0_seq1_m.40906 | PREDICTED: putative quinone-oxidoreductase homolog, chloroplastic [Prunus mume]  | 25.49  | 12.034 | 21.7 | 5  | 10 | 5  | 0.922 | 0.895 | 0.9   | 1.147 | 1.088 | 1.11  | 1.231 | 3.17E-04 |

|                                                  |                                                                                       |        |        |      |   |    |   |       |       |       |       |       |       |       |          |
|--------------------------------------------------|---------------------------------------------------------------------------------------|--------|--------|------|---|----|---|-------|-------|-------|-------|-------|-------|-------|----------|
| cds.Camellia_sinensis.comp3374_0_c0_seq4_m.44344 | PREDICTED:<br>putative quinone-oxidoreductase homolog, chloroplastic [Vitis vinifera] | 26.873 | 48.773 | 37.5 | 8 | 16 | 8 | 0.76  | 0.787 | 0.842 | 1.169 | 1.224 | 1.244 | 1.522 | 2.83E-04 |
| cds.Camellia_sinensis.comp3375_1_c0_seq1_m.26198 | PREDICTED:<br>protein AUXIN RESPONSE E 4-like [Nicotiana tabacum]                     | 49.845 | 10.701 | 11.4 | 4 | 6  | 4 | 0.984 | 0.998 | 1.024 | 1.015 | 0.897 | 0.987 | 0.964 | 3.93E-01 |
| cds.Camellia_sinensis.comp3375_3_c0_seq3_m.13069 | PREDICTED:<br>transmembrane 9 superfamily member 1 [Daucus carota subsp. sativus]     | 73.379 | 28.64  | 8.7  | 5 | 8  | 5 | 1.023 | 1.014 | 1.108 | 0.931 | 0.961 | 0.935 | 0.899 | 2.40E-02 |
| cds.Camellia_sinensis.comp3375_4_c0_seq1_m.2989  | Calcium-transporting ATPase 2, plasma membrane-type [Morus notabilis]                 | 110.65 | 21.117 | 7.9  | 9 | 11 | 7 | 0.972 | 0.969 | 1.014 | 1.019 | 1.061 | 0.989 | 1.039 | 2.08E-01 |





|                                                     |                                                                                                         |        |        |      |    |    |    |       |       |       |       |       |       |       |          |
|-----------------------------------------------------|---------------------------------------------------------------------------------------------------------|--------|--------|------|----|----|----|-------|-------|-------|-------|-------|-------|-------|----------|
| cds.Camellia_sinensis.comp3377.4_c0_seq1_m.647      | PREDICTED:<br>DEXH-box<br>ATP-dependent<br>RNA<br>helicase<br>DEXH14<br>[Juglans regia]                 | 236.14 | 3.3879 | 0.8  | 2  | 2  | 2  | 1.028 | 1.059 | 1.045 | 0.916 | 0.942 | 1.003 | 0.913 | 3.18E-02 |
| cds.Camellia_sinensis.comp3377.5_c0_seq1_2_m.4373_1 | PREDICTED:<br>phenazine<br>biosynthesis-like<br>domain-<br>containing<br>protein 1<br>[Sesamum indicum] | 28.619 | 9.3833 | 16.7 | 3  | 4  | 3  | 1.021 | 0.996 | 0.866 | 1.029 | 1.084 | 1.018 | 1.086 | 1.97E-01 |
| cds.Camellia_sinensis.comp3377.6_c0_seq1_m.19252    | PREDICTED:<br>(-)-<br>alpha-<br>terpineol<br>synthase<br>[Vitis vinifera]                               | 70.02  | 47.141 | 12.2 | 7  | 10 | 7  | 1.351 | 1.265 | 1.304 | 0.639 | 0.691 | 0.651 | 0.505 | 2.15E-05 |
| cds.Camellia_sinensis.comp3377.7_c0_seq2_m.11553    | PREDICTED:<br>NADP-<br>dependent<br>malic<br>enzyme<br>[Jatropha curcas]                                | 63.849 | 124.66 | 33.2 | 18 | 49 | 11 | 0.902 | 0.908 | 0.899 | 1.109 | 1.12  | 1.11  | 1.233 | 5.36E-07 |

|                                                  |                                                                          |        |        |      |    |    |   |       |       |       |       |       |       |       |          |
|--------------------------------------------------|--------------------------------------------------------------------------|--------|--------|------|----|----|---|-------|-------|-------|-------|-------|-------|-------|----------|
| cds.Camellia_sinensis.comp3377_7_c0_seq5_m.13395 | PREDICTED:<br>NADP-dependent malic enzyme isoform XI [Elaeis guineensis] | 63.776 | -2     | 15.9 | 8  | 21 | 0 |       |       |       |       |       |       |       |          |
| cds.Camellia_sinensis.comp3377_9_c0_seq1_m.5726  | AMP deaminase [Morus notabilis]                                          | 97.692 | 5.8963 | 2.9  | 2  | 2  | 2 | 1.123 | 1.099 | 0.996 | 0.916 | 0.915 | 0.929 | 0.858 | 5.50E-02 |
| cds.Camellia_sinensis.comp3378_0_c0_seq6_m.35358 | NF-kappa-B inhibitor-like protein [Arabidopsis thaliana]                 | 20.06  | 8.9984 | 11.8 | 2  | 3  | 2 | 0.957 | 1.037 | 0.984 | 1.002 | 0.966 | 1.066 | 1.019 | 6.47E-01 |
| cds.Camellia_sinensis.comp3378_4_c0_seq4_m.22630 | Bifunctional aspartokinase/homoserine dehydrogenase [Morus notabilis]    | 53.058 | 1.4244 | 32.2 | 11 | 21 | 1 | 0.984 | 0.999 | 1.068 | 0.94  | 1.017 | 0.998 | 0.969 | 4.09E-01 |
| cds.Camellia_sinensis.comp3378_5_c0_seq2_m.24838 | PREDICTED:<br>caffeine synthase 1 [Theobroma cacao]                      | 41.41  | 21.465 | 5.1  | 2  | 6  | 2 | 1.076 | 1.107 | 1.075 | 0.914 | 0.928 | 0.879 | 0.835 | 6.61E-04 |





|                                |                                                                                                          |        |        |      |   |    |   |       |       |       |       |       |       |       |          |
|--------------------------------|----------------------------------------------------------------------------------------------------------|--------|--------|------|---|----|---|-------|-------|-------|-------|-------|-------|-------|----------|
|                                | PREDICT<br>ED:                                                                                           |        |        |      |   |    |   |       |       |       |       |       |       |       |          |
| cds.Camellia_sinensis.comp3379 | ATPase 11, plasma membrane-type-like, partial [Ziziphus jujuba]                                          | 19.483 | -2     | 26.1 | 4 | 7  | 1 | 1.16  | 1.111 | 1.11  | 0.872 | 0.906 | 0.806 | 0.764 | 1.96E-03 |
|                                | PREDICT<br>ED: GDP-L-galactose phosphorylase 2-like [Juglans regia]                                      |        |        |      |   |    |   |       |       |       |       |       |       |       |          |
| cds.Camellia_sinensis.comp3379 | L-galactose phosphorylase 2-like [Juglans regia]                                                         | 50.598 | 1.471  | 2    | 1 | 1  | 1 | 1.016 | 0.987 | 1.034 | 0.955 | 1.017 | 0.996 | 0.977 | 3.70E-01 |
|                                | PREDICT<br>ED: peptidyl-prolyl cis-trans isomerase CYP26-2, chloroplastic [Daucus carota subsp. sativus] |        |        |      |   |    |   |       |       |       |       |       |       |       |          |
| cds.Camellia_sinensis.comp3380 | peptidyl-prolyl cis-trans isomerase CYP26-2, chloroplastic [Daucus carota subsp. sativus]                | 42.714 | 30.237 | 17.9 | 7 | 14 | 7 | 0.957 | 0.963 | 0.986 | 1.032 | 1.006 | 1.007 | 1.048 | 1.93E-02 |

|                                                     |                                                                                                                                                                |        |        |      |    |    |    |       |       |       |       |       |       |       |          |
|-----------------------------------------------------|----------------------------------------------------------------------------------------------------------------------------------------------------------------|--------|--------|------|----|----|----|-------|-------|-------|-------|-------|-------|-------|----------|
| cds.Camellia_sinensis.comp3381_0_c0_seq1_2_m.1645_9 | PREDICT<br>ED:<br>peptide-<br>N(4)-(N-<br>acetyl-<br>beta-<br>glucosami-<br>nyl)aspara-<br>gine<br>amidase-<br>like<br>isoform<br>X3<br>[Nicotiana<br>tabacum] | 47.329 | 34.231 | 12   | 5  | 8  | 5  | 0.982 | 0.967 | 1.035 | 0.961 | 1.046 | 0.992 | 1.005 | 8.88E-01 |
| cds.Camellia_sinensis.comp3381_0_c0_seq1_6_m.2101_3 | PREDICT<br>ED:<br>elongation<br>factor Tu,<br>mitochond-<br>rial<br>[Ziziphus<br>jujuba]                                                                       | 49.151 | 4.0318 | 26   | 10 | 34 | 1  |       | 0.969 |       |       |       |       |       |          |
| cds.Camellia_sinensis.comp3381_0_c0_seq1_7_m.2116_3 | PREDICT<br>ED:<br>elongation<br>factor Tu,<br>mitochond-<br>rial<br>[Ziziphus<br>jujuba]                                                                       | 49.41  | 183.58 | 58.3 | 23 | 59 | 13 | 1.002 | 0.997 | 0.971 | 1.008 | 0.98  | 1.036 | 1.018 | 3.95E-01 |
| cds.Camellia_sinensis.comp3381_6_c0_seq1_m.11403    | PREDICT<br>ED:<br>probable<br>methyltran-<br>sferase<br>PMT3<br>[Sesamum<br>indicum]                                                                           | 70.795 | 11.198 | 10.5 | 7  | 7  | 7  | 1.136 | 1.095 | 1.13  | 0.916 | 0.917 | 0.858 | 0.801 | 8.56E-04 |

|                                |                   |                                                                                        |        |        |      |    |    |    |       |       |       |       |       |       |       |          |
|--------------------------------|-------------------|----------------------------------------------------------------------------------------|--------|--------|------|----|----|----|-------|-------|-------|-------|-------|-------|-------|----------|
| cds.Camellia_sinensis.comp3382 | 1_c0_seq1_m.3784  | PREDICTED:<br>calmodulin-binding transcription activator 4 isoform X4 [Vitis vinifera] | 102.32 | 1.9756 | 0.9  | 1  | 1  | 1  | 1.144 | 0.939 | 1.252 | 0.854 | 0.78  | 0.998 | 0.789 | 1.03E-01 |
| cds.Camellia_sinensis.comp3382 | 4_c0_seq2_m.36478 | PREDICTED:<br>uncharacterized mitochondrial protein AtMg00820-like [Solanum pennellii] | 13.265 | 1.1996 | 7.8  | 1  | 1  | 1  | 0.38  | 1.355 | 1.338 | 1.39  | 0.9   | 0.736 | 0.985 | 8.44E-01 |
| cds.Camellia_sinensis.comp3382 | 7_c0_seq1_m.7425  | triacylglycerol lipase, putative [Medicago truncatula]                                 | 97.312 | 35.235 | 11.9 | 10 | 18 | 10 | 0.997 | 0.99  | 0.975 | 1.011 | 0.989 | 0.993 | 1.01  | 3.32E-01 |
| cds.Camellia_sinensis.comp3383 | 0_c0_seq4_m.37216 | PREDICTED:<br>soluble inorganic pyrophosphatase 2 isoform X1 [Ziziphus jujuba]         | 24.22  | 36.447 | 27.8 | 6  | 14 | 4  | 1.052 | 1.013 | 0.966 | 0.931 | 1.033 | 0.987 | 0.974 | 5.25E-01 |

|                                                  |                                                                          |        |        |     |   |   |   |       |       |       |       |       |       |       |          |
|--------------------------------------------------|--------------------------------------------------------------------------|--------|--------|-----|---|---|---|-------|-------|-------|-------|-------|-------|-------|----------|
|                                                  | PREDICT<br>ED:                                                           |        |        |     |   |   |   |       |       |       |       |       |       |       |          |
| cds.Camellia_sinensis.comp3383_2_c0_seq3_m.4772  | vacuolar protein sorting-associated protein 18 homolog [Citrus sinensis] | 40.004 | 4.7417 | 6.9 | 3 | 4 | 3 | 0.958 | 0.988 | 0.999 | 1.018 | 1.001 | 1.032 | 1.036 | 8.19E-02 |
|                                                  | PREDICT<br>ED:                                                           |        |        |     |   |   |   |       |       |       |       |       |       |       |          |
| cds.Camellia_sinensis.comp3383_2_c0_seq7_m.15327 | vacuolar protein sorting-associated protein 18 homolog [Vitis vinifera]  | 24.52  | 1.9945 | 4   | 1 | 1 | 1 | 1.06  | 1.028 | 0.926 | 1.028 | 1.009 | 0.952 | 0.992 | 8.86E-01 |
|                                                  | PREDICT<br>ED:                                                           |        |        |     |   |   |   |       |       |       |       |       |       |       |          |
| cds.Camellia_sinensis.comp3383_3_c0_seq1_m.1745  | phytochrome B [Nicotiana attenuata]                                      | 92.778 | 2.3612 | 2   | 1 | 1 | 1 | 0.828 | 1.039 | 1.07  | 1.005 | 1.032 | 1.057 | 1.053 | 5.18E-01 |
|                                                  | PREDICT<br>ED:                                                           |        |        |     |   |   |   |       |       |       |       |       |       |       |          |
| cds.Camellia_sinensis.comp3383_5_c0_seq1_m.2917  | calmodulin-binding transcription activator 3 isoform X2 [Vitis vinifera] | 101.35 | 3.8512 | 3.1 | 2 | 3 | 2 | 1.042 | 1.343 | 1.269 | 0.742 | 0.729 | 0.825 | 0.628 | 5.88E-03 |

|                                |                                                                                                    |        |        |      |   |   |   |       |       |       |       |       |       |       |          |
|--------------------------------|----------------------------------------------------------------------------------------------------|--------|--------|------|---|---|---|-------|-------|-------|-------|-------|-------|-------|----------|
| cds.Camellia_sinensis.comp3383 | PREDICT<br>ED: ABC transporter<br>C family member 3<br>[Juglans regia]                             | 162.49 | 2.4264 | 1.7  | 2 | 3 | 1 |       |       |       |       |       |       |       |          |
| cds.Camellia_sinensis.comp3384 | PREDICT<br>ED: urease isoform X1<br>[Vitis vinifera]                                               | 89.823 | 12.235 | 6.2  | 6 | 6 | 6 | 0.925 | 0.972 | 1.021 | 1.076 | 1.008 | 1.043 | 1.072 | 1.11E-01 |
| cds.Camellia_sinensis.comp3384 | PREDICT<br>ED: serine carboxypeptidase-like 34<br>[Nicotiana attenuata]                            | 43.487 | 9.0222 | 6.8  | 2 | 4 | 2 |       |       |       |       |       |       |       |          |
| cds.Camellia_sinensis.comp3384 | PREDICT<br>ED: serine carboxypeptidase-like 34<br>[Gossypium hirsutum]                             | 11.371 | 6.7125 | 18   | 2 | 3 | 2 | 0.999 | 0.996 | 1.035 | 0.983 | 1.026 | 0.971 | 0.983 | 4.65E-01 |
| cds.Camellia_sinensis.comp3385 | PREDICT<br>ED: probable LRR receptor-like serine/threonine-protein kinase<br>At1g06840<br>[Sesamum | 10.719 | 5.4683 | 26.3 | 2 | 2 | 2 | 0.968 | 1.019 | 1.148 | 1.084 | 0.875 | 0.917 | 0.917 | 3.46E-01 |

|                                                  |                                                                                  |        |        |      |   |    |   |       |       |       |       |       |       |       |          |
|--------------------------------------------------|----------------------------------------------------------------------------------|--------|--------|------|---|----|---|-------|-------|-------|-------|-------|-------|-------|----------|
| cds.Camellia_sinensis.comp3385_6_c0_seq1_m.4923  | PREDICTED:<br>U4/U6 small nuclear ribonucleoprotein PRP4-like protein [Capsicum] | 65.943 | 2.96   | 3.2  | 2 | 3  | 2 | 0.968 | 1.05  | 1.07  | 0.994 | 0.93  | 0.987 | 0.943 | 1.92E-01 |
| cds.Camellia_sinensis.comp3385_6_c0_seq2_m.19953 | PREDICTED:<br>L-idonate 5-dehydrogenase isoform XI [Vitis vinifera]              | 40.424 | 1.3814 | 4.8  | 2 | 2  | 1 | 0.891 | 0.879 | 0.896 | 1.144 | 1.103 | 1.134 | 1.268 | 4.18E-05 |
| cds.Camellia_sinensis.comp3386_2_c0_seq1_m.24624 | PREDICTED:<br>aspartate carbamoyltransferase, chloroplastic [Vitis vinifera]     | 20.835 | 2.2978 | 16.8 | 3 | 4  | 1 | 1.121 | 1.094 | 0.895 | 0.985 | 0.935 | 0.957 | 0.925 | 3.73E-01 |
| cds.Camellia_sinensis.comp3386_2_c0_seq2_m.25605 | PREDICTED:<br>aspartate carbamoyltransferase, chloroplastic [Vitis vinifera]     | 48.528 | 80.381 | 20.4 | 9 | 12 | 7 | 0.965 | 0.985 | 1.001 | 1.095 | 1.028 | 1.028 | 1.068 | 5.04E-02 |

|                                                  |                                                                                                                                               |        |        |      |    |    |    |       |       |       |       |       |       |       |          |
|--------------------------------------------------|-----------------------------------------------------------------------------------------------------------------------------------------------|--------|--------|------|----|----|----|-------|-------|-------|-------|-------|-------|-------|----------|
| cds.Camellia_sinensis.comp3386_4_c0_seq1_m.18334 | PREDICTED:<br>phosphoacetylglucosamine mutase<br>[Sesamum indicum]<br>phosphoacetylglucosamine mutase family protein<br>[Populus trichocarpa] | 21.564 | 20.752 | 19.5 | 3  | 3  | 3  | 0.985 | 1.027 | 0.968 | 1.006 | 0.989 | 1.069 | 1.028 | 4.02E-01 |
| cds.Camellia_sinensis.comp3386_4_c0_seq4_m.31714 | PREDICTED:<br>alpha-L-arabinofuranosidase 1<br>[Theobroma cacao]                                                                              | 73.682 | 145.76 | 26.5 | 14 | 29 | 14 | 1.068 | 1.001 | 1.028 | 0.965 | 0.956 | 0.949 | 0.927 | 1.75E-02 |
| cds.Camellia_sinensis.comp3386_9_c0_seq9_m.15654 | PREDICTED:<br>dihydroorotate dehydrogenase (quinone), mitochondrial<br>[Nicotiana tomentosiformis]                                            | 48.933 | 21.725 | 16.2 | 5  | 8  | 5  | 0.973 | 1.001 | 0.991 | 1.041 | 1.021 | 0.987 | 1.028 | 1.91E-01 |



|                                                     |                                                                                             |        |        |      |   |    |   |       |       |       |       |       |       |       |          |
|-----------------------------------------------------|---------------------------------------------------------------------------------------------|--------|--------|------|---|----|---|-------|-------|-------|-------|-------|-------|-------|----------|
|                                                     | PREDICT                                                                                     |        |        |      |   |    |   |       |       |       |       |       |       |       |          |
|                                                     | ED:                                                                                         |        |        |      |   |    |   |       |       |       |       |       |       |       |          |
| cds.Camellia_sinensis.comp3387_0_c0_seq1_m.320      | BEACH domain-containing protein C2 isoform X1 [Vitis vinifera]                              | 239.69 | 1.1736 | 0.4  | 1 | 1  | 1 |       |       |       |       |       |       |       |          |
|                                                     | PREDICT                                                                                     |        |        |      |   |    |   |       |       |       |       |       |       |       |          |
|                                                     | ED:                                                                                         |        |        |      |   |    |   |       |       |       |       |       |       |       |          |
| cds.Camellia_sinensis.comp3387_0_c0_seq1_m.321      | BEACH domain-containing protein C2 isoform X1 [Vitis vinifera]                              | 81.947 | 7.2691 | 4.9  | 3 | 3  | 3 |       |       |       |       |       |       |       |          |
|                                                     | PREDICT                                                                                     |        |        |      |   |    |   |       |       |       |       |       |       |       |          |
|                                                     | ED: signal                                                                                  |        |        |      |   |    |   |       |       |       |       |       |       |       |          |
| cds.Camellia_sinensis.comp3387_1_c0_seq3_m.5629     | recognition particle subunit SRP72 [Solanum lycopersicum]                                   | 73.239 | 3.9676 | 2.9  | 2 | 2  | 2 | 1.1   | 1.084 | 1.017 | 0.91  | 0.937 | 0.934 | 0.869 | 5.58E-03 |
|                                                     | PREDICT                                                                                     |        |        |      |   |    |   |       |       |       |       |       |       |       |          |
|                                                     | ED:                                                                                         |        |        |      |   |    |   |       |       |       |       |       |       |       |          |
| cds.Camellia_sinensis.comp3387_1_c0_seq5_0_m.4238_6 | haloacid dehalogenase-like hydrolase domain-containing protein 3 isoform X5 [Juglans regia] | 28.024 | 50.901 | 36.8 | 8 | 13 | 8 | 0.996 | 0.99  | 0.974 | 1.002 | 1.01  | 1.021 | 1.025 | 4.73E-02 |







|                                                    |                                                                                                                 |        |        |      |   |    |   |       |       |       |       |       |       |       |          |
|----------------------------------------------------|-----------------------------------------------------------------------------------------------------------------|--------|--------|------|---|----|---|-------|-------|-------|-------|-------|-------|-------|----------|
| cds.Camellia_sinensis.comp3390_6_c0_seq2_m.25830   | PREDICT<br>ED:<br>cinnamoyl-CoA reductase 1-like<br>[Juglans regia]                                             | 35.449 | 48.443 | 29   | 8 | 16 | 8 | 0.964 | 0.981 | 0.994 | 1.039 | 1.006 | 1.017 | 1.042 | 3.43E-02 |
| cds.Camellia_sinensis.comp3390_6_c0_seq3_m.27977   | PREDICT<br>ED:<br>cinnamoyl-CoA reductase 1-like<br>[Populus euphratica]                                        | 37.368 | 25.105 | 23.7 | 8 | 18 | 8 | 1.004 | 1.022 | 1.038 | 0.98  | 1.025 | 0.987 | 0.977 | 2.31E-01 |
| cds.Camellia_sinensis.comp3390_8_c0_seq1_m.29164   | PREDICT<br>ED:<br>probable 2-oxoglutarate-dependent dioxygenase<br>At3g49630 isoform X2<br>[Gossypium hirsutum] | 38.545 | 60.667 | 32.3 | 9 | 20 | 9 | 0.972 | 0.947 | 0.971 | 1.047 | 1.045 | 1.049 | 1.087 | 1.05E-02 |
| cds.Camellia_sinensis.comp3390_9_c1_seq2_4_m.41178 | PREDICT<br>ED:<br>prefoldin subunit 6<br>[Eucalyptus grandis]                                                   | 14.698 | 86.539 | 46.9 | 8 | 14 | 8 | 0.984 | 0.961 | 0.941 | 1.024 | 1.058 | 1.033 | 1.079 | 9.16E-03 |

|                                                  |                                                                                          |        |        |      |    |    |    |       |       |       |       |       |       |       |          |
|--------------------------------------------------|------------------------------------------------------------------------------------------|--------|--------|------|----|----|----|-------|-------|-------|-------|-------|-------|-------|----------|
| cds.Camellia_sinensis.comp3391_0_c0_seq2_m.15403 | PREDICTED:<br>polypyrimidine tract-binding protein homolog 3 isoform X1 [Vitis vinifera] | 49.338 | 13.329 | 4.7  | 2  | 5  | 2  | 0.959 | 1.005 | 0.952 | 1.074 | 1.059 | 1.015 | 1.08  | 3.33E-02 |
| cds.Camellia_sinensis.comp3391_1_c0_seq1_m.15177 | PREDICTED:<br>eukaryotic peptide chain release factor subunit 1-3 [Vitis vinifera]       | 49.119 | 23.01  | 12.6 | 5  | 7  | 5  | 1.045 | 1.09  | 1.115 | 0.96  | 0.874 | 0.9   | 0.841 | 6.72E-03 |
| cds.Camellia_sinensis.comp3391_2_c0_seq1_m.4257  | PREDICTED:<br>ribonuclease TUDOR 1 [Vitis vinifera]                                      | 108.05 | 173.05 | 39.1 | 34 | 55 | 32 | 1.073 | 1.059 | 1.055 | 0.941 | 0.944 | 0.929 | 0.883 | 6.09E-05 |
| cds.Camellia_sinensis.comp3391_2_c0_seq3_m.52756 | PREDICTED:<br>ribonuclease TUDOR 1 [Vitis vinifera]                                      | 17.419 | 40.241 | 26.9 | 3  | 7  | 1  | 1.058 | 0.937 | 1.126 | 0.873 | 0.989 | 1.007 | 0.919 | 3.01E-01 |

|                                                     |                                                                                           |        |        |      |    |    |    |       |       |       |       |       |       |       |          |
|-----------------------------------------------------|-------------------------------------------------------------------------------------------|--------|--------|------|----|----|----|-------|-------|-------|-------|-------|-------|-------|----------|
| cds.Camellia_sinensis.comp3391_3_c0_seq3_m.10650    | PREDICT<br>ED: chitin elicitor receptor kinase 1 isoform X2<br>[Ricinus communis]         | 30.026 | 1.2562 | 7.8  | 2  | 2  | 2  | 0.965 | 0.983 | 1.021 | 0.94  | 1.014 | 1.087 | 1.024 | 6.45E-01 |
| cds.Camellia_sinensis.comp3391_5_c0_seq1_3_m.1464_7 | PREDICT<br>ED: SWI/SNF complex component SNF12 homolog<br>[Prunus mume]                   | 60.533 | 3.1169 | 4.6  | 2  | 2  | 2  | 0.899 | 0.922 | 1.031 | 0.997 | 1.102 | 1.08  | 1.115 | 1.03E-01 |
| cds.Camellia_sinensis.comp3391_7_c0_seq5_m.17790    | CBL-interacting protein kinase 12<br>[Vitis vinifera]                                     | 23.858 | 1.2942 | 5.2  | 1  | 1  | 1  |       |       |       |       |       |       |       |          |
| cds.Camellia_sinensis.comp3391_8_c4_seq1_m.22509    | PREDICT<br>ED: 26S proteasome non-ATPase regulatory subunit 11 homolog<br>[Juglans regia] | 49.861 | 85.341 | 31.5 | 15 | 25 | 15 | 0.96  | 0.972 | 0.98  | 1.053 | 1.033 | 1.019 | 1.066 | 4.68E-03 |
| cds.Camellia_sinensis.comp3392_2_c0_seq2_m.15111    | transmembrane protein<br>[Arabidopsis thaliana]                                           | 54.251 | 11.879 | 12.6 | 7  | 9  | 7  | 1.074 | 1.065 | 1.071 | 0.884 | 0.976 | 0.936 | 0.871 | 4.04E-02 |





|                                                  |                                                                       |        |        |      |    |    |    |       |       |       |       |       |       |       |          |
|--------------------------------------------------|-----------------------------------------------------------------------|--------|--------|------|----|----|----|-------|-------|-------|-------|-------|-------|-------|----------|
|                                                  | PREDICT<br>ED:                                                        |        |        |      |    |    |    |       |       |       |       |       |       |       |          |
| cds.Camellia_sinensis.comp3393.2_c0_seq1_m.28186 | cytosolic sulfotransferase 15-like [Pyrus bretschneideri]             | 43.31  | 43.773 | 17.6 | 6  | 16 | 5  | 0.958 | 0.999 | 0.998 | 1.017 | 0.978 | 1.037 | 1.026 | 3.10E-01 |
|                                                  | PREDICT<br>ED:                                                        |        |        |      |    |    |    |       |       |       |       |       |       |       |          |
| cds.Camellia_sinensis.comp3393.3_c0_seq1_m.2733  | protein transport protein SEC31 homolog B isoform X2 [Vitis vinifera] | 100.81 | 93.229 | 23.7 | 17 | 23 | 13 | 0.959 | 1.004 | 1.011 | 1.031 | 1.008 | 1.006 | 1.024 | 2.64E-01 |
|                                                  | PREDICT<br>ED:                                                        |        |        |      |    |    |    |       |       |       |       |       |       |       |          |
| cds.Camellia_sinensis.comp3393.3_c0_seq3_m.14914 | protein transport protein SEC31 homolog B isoform X2 [Vitis vinifera] | 66.449 | 31.616 | 17.9 | 11 | 13 | 7  | 0.957 | 0.96  | 0.978 | 1.025 | 1.043 | 1.048 | 1.076 | 1.54E-03 |

|                                                                      |                                                                                                                    |        |        |     |   |   |   |       |       |       |       |       |       |       |          |
|----------------------------------------------------------------------|--------------------------------------------------------------------------------------------------------------------|--------|--------|-----|---|---|---|-------|-------|-------|-------|-------|-------|-------|----------|
|                                                                      | PREDICT<br>ED:<br>probable<br>sodium/me<br>tabolite                                                                |        |        |     |   |   |   |       |       |       |       |       |       |       |          |
| cds.Camell<br>ia_sinensis<br>.comp3393<br>5_c0_seq3<br>_m.47980      | cotransport<br>er BASS2,<br>chloroplast<br>ic isoform<br>X1<br>[Nelumbo<br>nucifera]                               | 20.286 | 6.6018 | 6.9 | 1 | 1 | 1 | 1.089 | 1.057 | 1.128 | 0.848 | 0.923 | 0.932 | 0.826 | 5.58E-03 |
|                                                                      | PREDICT<br>ED:<br>putative<br>transferase                                                                          |        |        |     |   |   |   |       |       |       |       |       |       |       |          |
| cds.Camell<br>ia_sinensis<br>.comp3394<br>1_c0_seq1<br>7_m.2288<br>8 | At4g1213<br>0,<br>mitochond<br>rial<br>[Juglans<br>regia]                                                          | 45.722 | 2.5172 | 2.7 | 1 | 1 | 1 |       |       |       |       |       |       |       |          |
|                                                                      | PREDICT<br>ED:<br>carbon<br>catabolite<br>repressor<br>protein 4<br>homolog 5<br>isoform<br>X2 [Vitis<br>vinifera] |        |        |     |   |   |   |       |       |       |       |       |       |       |          |
| cds.Camell<br>ia_sinensis<br>.comp3394<br>1_c0_seq3<br>0_m.3067<br>0 |                                                                                                                    | 19.971 | -2     | 4.1 | 1 | 1 | 1 | 0.932 | 0.975 | 0.979 | 1.078 | 1.029 | 1.033 | 1.088 | 1.77E-02 |

|                                                   |                                                                                      |        |        |      |    |    |    |       |       |       |       |       |       |       |          |
|---------------------------------------------------|--------------------------------------------------------------------------------------|--------|--------|------|----|----|----|-------|-------|-------|-------|-------|-------|-------|----------|
| cds.Camellia_sinensis.comp3394_3_c0_seq1_m.12954  | PREDICT ED: probable inactive purple acid phosphatase 1 isoform X1 [Citrus sinensis] | 68.668 | 203.44 | 36.1 | 16 | 26 | 10 | 0.942 | 0.918 | 0.935 | 1.105 | 1.1   | 1.049 | 1.164 | 1.16E-03 |
| cds.Camellia_sinensis.comp3394_3_c0_seq4_m.15739  | PREDICT ED: probable inactive purple acid phosphatase 1 [Malus domestica]            | 40.079 | 7.7103 | 23.3 | 7  | 9  | 3  | 1.027 | 1.011 | 0.935 | 1.088 | 0.915 | 1.034 | 1.022 | 7.57E-01 |
| cds.Camellia_sinensis.comp3394_4_c1_seq1_m.4098_3 | PREDICT ED: acyl-CoA-binding domain-containing protein 4 [Juglans regia]             | 21.779 | 13.464 | 20.1 | 4  | 6  | 3  | 1.042 | 1.054 | 1.094 | 0.932 | 0.944 | 0.965 | 0.891 | 2.92E-03 |
| cds.Camellia_sinensis.comp3394_4_c1_seq4_m.13093  | PREDICT ED: probable calcium-binding protein CML43 [Theobroma cacao]                 | 28.13  | 7.8116 | 22.5 | 7  | 8  | 7  | 1.036 | 1.038 | 1.036 | 0.999 | 0.971 | 0.965 | 0.944 | 3.22E-02 |





|                                                  |                                                                   |        |        |      |    |    |    |       |       |       |       |       |       |       |          |
|--------------------------------------------------|-------------------------------------------------------------------|--------|--------|------|----|----|----|-------|-------|-------|-------|-------|-------|-------|----------|
|                                                  | PREDICT                                                           |        |        |      |    |    |    |       |       |       |       |       |       |       |          |
|                                                  | ED:                                                               |        |        |      |    |    |    |       |       |       |       |       |       |       |          |
| cds.Camellia_sinensis.comp3397_2_c1_seq3_m.2695  | probable isoleucine-tRNA ligase, cytoplasmic<br>[Sesamum indicum] | 132.26 | 55.389 | 15.1 | 18 | 20 | 18 | 1.008 | 1.012 | 0.992 | 1.015 | 0.991 | 1.012 | 1.002 | 8.49E-01 |
|                                                  | PREDICT                                                           |        |        |      |    |    |    |       |       |       |       |       |       |       |          |
|                                                  | ED:                                                               |        |        |      |    |    |    |       |       |       |       |       |       |       |          |
| cds.Camellia_sinensis.comp3397_8_c1_seq3_m.5793  | dynamamin-related protein 3A-like<br>[Nicotiana tabacum]          | 72.769 | 31.305 | 17.9 | 12 | 16 | 10 | 0.994 | 1.011 | 0.987 | 1.022 | 1.006 | 1.01  | 1.015 | 1.49E-01 |
|                                                  | PREDICT                                                           |        |        |      |    |    |    |       |       |       |       |       |       |       |          |
|                                                  | ED:                                                               |        |        |      |    |    |    |       |       |       |       |       |       |       |          |
| cds.Camellia_sinensis.comp3397_8_c1_seq3_m.5794  | dynamamin-related protein 3A-like, partial<br>[Nicotiana tabacum] | 18.096 | 1.9426 | 14.8 | 2  | 2  | 1  | 0.985 | 1.037 | 1.091 | 1.012 | 1.011 | 0.874 | 0.931 | 2.67E-01 |
|                                                  | PREDICT                                                           |        |        |      |    |    |    |       |       |       |       |       |       |       |          |
|                                                  | ED:                                                               |        |        |      |    |    |    |       |       |       |       |       |       |       |          |
| cds.Camellia_sinensis.comp3397_8_c1_seq5_m.27523 | dynamamin-related protein 3A<br>[Sesamum indicum]                 | 36.661 | 8.9523 | 14.4 | 4  | 7  | 2  | 0.942 | 1.045 | 0.969 | 0.969 | 1.055 | 1.035 | 1.035 | 4.39E-01 |

|                                |                                                             |        |        |      |   |    |   |       |       |       |       |       |       |       |          |
|--------------------------------|-------------------------------------------------------------|--------|--------|------|---|----|---|-------|-------|-------|-------|-------|-------|-------|----------|
|                                | PREDICTED:                                                  |        |        |      |   |    |   |       |       |       |       |       |       |       |          |
| cds.Camellia_sinensis.comp3398 | vacuolar protein sorting-associated protein 52A             | 80.486 | 3.0987 | 1.7  | 1 | 1  | 1 |       |       |       |       |       |       |       |          |
|                                | [Jatropha curcas]                                           |        |        |      |   |    |   |       |       |       |       |       |       |       |          |
|                                | PREDICTED:                                                  |        |        |      |   |    |   |       |       |       |       |       |       |       |          |
| cds.Camellia_sinensis.comp3398 | ED: dentin sialophosphoprotein                              | 105.54 | 9.7128 | 3.8  | 3 | 3  | 3 | 1.008 | 1.038 | 1.069 | 0.985 | 0.947 | 1.005 | 0.943 | 7.29E-02 |
|                                | [Pyrus x bretschneideri]                                    |        |        |      |   |    |   |       |       |       |       |       |       |       |          |
|                                | cyclopropyl-fatty-acyl-phospholipid synthase family protein |        |        |      |   |    |   |       |       |       |       |       |       |       |          |
| cds.Camellia_sinensis.comp3398 | [Populus trichocarpa]                                       | 66.255 | 1.6065 | 1.5  | 1 | 1  | 1 |       |       |       |       |       |       |       |          |
|                                | Glucan endo-1,3-beta-glucosidase, basic isoform             |        |        |      |   |    |   |       |       |       |       |       |       |       |          |
| cds.Camellia_sinensis.comp3398 | [Morus notabilis]                                           | 30.21  | 58.25  | 33.8 | 6 | 10 | 6 | 0.981 | 1.01  | 1.1   | 0.988 | 0.973 | 0.957 | 0.944 | 1.87E-01 |











|                                                     |                                                                                  |        |        |      |   |    |   |       |       |       |       |       |       |       |          |
|-----------------------------------------------------|----------------------------------------------------------------------------------|--------|--------|------|---|----|---|-------|-------|-------|-------|-------|-------|-------|----------|
|                                                     | PREDICT                                                                          |        |        |      |   |    |   |       |       |       |       |       |       |       |          |
|                                                     | ED:                                                                              |        |        |      |   |    |   |       |       |       |       |       |       |       |          |
| cds.Camellia_sinensis.comp3401.8_c0_seq2_m.20619    | protein KINESIN LIGHT CHAIN-RELATED 2 [Vitis vinifera]                           | 58.212 | 4.9927 | 7.3  | 3 | 3  | 3 | 0.932 | 0.909 | 0.868 | 1.065 | 1.116 | 1.145 | 1.228 | 2.32E-03 |
|                                                     | PREDICT                                                                          |        |        |      |   |    |   |       |       |       |       |       |       |       |          |
|                                                     | ED:                                                                              |        |        |      |   |    |   |       |       |       |       |       |       |       |          |
| cds.Camellia_sinensis.comp3402.5_c0_seq2_0_m.2249_9 | protein disulfide isomerase-like 5-4 [Sesamum indicum]                           | 53.83  | 3.7179 | 2.1  | 1 | 2  | 1 |       |       |       |       |       |       |       |          |
|                                                     | PREDICT                                                                          |        |        |      |   |    |   |       |       |       |       |       |       |       |          |
|                                                     | ED: YTH domain-containing family protein 2-like isoform X5 [Gossypium raimondii] |        |        |      |   |    |   |       |       |       |       |       |       |       |          |
| cds.Camellia_sinensis.comp3402.5_c0_seq9_m.18171    | protein 2-like isoform X5 [Gossypium raimondii]                                  | 24.909 | 2.5779 | 4.1  | 1 | 1  | 1 |       |       |       |       |       |       |       |          |
|                                                     | PREDICT                                                                          |        |        |      |   |    |   |       |       |       |       |       |       |       |          |
|                                                     | ED:                                                                              |        |        |      |   |    |   |       |       |       |       |       |       |       |          |
| cds.Camellia_sinensis.comp3402.7_c0_seq1_m.4704     | valine--tRNA ligase, mitochondrial isoform X1 [Sesamum                           | 62.244 | 22.744 | 14.3 | 8 | 12 | 7 | 1.016 | 1.021 | 1.018 | 0.975 | 0.985 | 0.978 | 0.962 | 3.03E-04 |





|                                                 |                                                                                                                                      |        |        |      |    |    |    |       |       |       |       |       |       |       |          |
|-------------------------------------------------|--------------------------------------------------------------------------------------------------------------------------------------|--------|--------|------|----|----|----|-------|-------|-------|-------|-------|-------|-------|----------|
| cds.Camellia_sinensis.comp34048_c0_seq1_m.4458  | PREDICT<br>ED:<br>ATPase 11, plasma membrane -type<br>[Theobroma cacao] ureidoglycolate hydrolase, putative<br>[Medicago truncatula] | 105.09 | 85.251 | 33.6 | 29 | 61 | 10 | 0.973 | 0.972 | 0.945 | 1.027 | 1.044 | 1.059 | 1.083 | 3.62E-03 |
| cds.Camellia_sinensis.comp34051_c2_seq2_m.45356 | PREDICT<br>ED:<br>ERAD-associated E3 ubiquitin-protein ligase<br>HRD1B<br>[Theobroma cacao]                                          | 21.358 | 10.422 | 26.6 | 5  | 5  | 5  | 0.867 | 0.908 | 0.955 | 1.231 | 1.029 | 1.064 | 1.218 | 3.44E-02 |
| cds.Camellia_sinensis.comp34052_c0_seq1_m.14055 | PREDICT<br>ED:<br>alpha-mannosidase isoform X2<br>[Populus euphratica]                                                               | 62.437 | 13.215 | 3.1  | 1  | 1  | 1  | 0.914 | 0.927 | 1.12  | 1.075 | 0.938 | 1.051 | 1.035 | 6.61E-01 |
| cds.Camellia_sinensis.comp34053_c0_seq1_m.3953  |                                                                                                                                      | 22.514 | 15.463 | 24.8 | 4  | 4  | 4  | 0.994 | 1.08  | 1.082 | 1.014 | 0.88  | 0.981 | 0.911 | 1.39E-01 |











|                                                     |                                                                           |        |        |      |   |    |   |       |       |       |       |       |       |       |          |
|-----------------------------------------------------|---------------------------------------------------------------------------|--------|--------|------|---|----|---|-------|-------|-------|-------|-------|-------|-------|----------|
|                                                     | PREDICT<br>ED:                                                            |        |        |      |   |    |   |       |       |       |       |       |       |       |          |
| cds.Camellia_sinensis.comp3409_4_c1_seq2_2_m.4278_8 | proline-, glutamic acid- and leucine-rich protein 1 [Theobroma cacao]     | 18.942 | 2.4182 | 5.7  | 1 | 1  | 1 |       |       |       |       |       |       |       |          |
|                                                     | PREDICT<br>ED:                                                            |        |        |      |   |    |   |       |       |       |       |       |       |       |          |
| cds.Camellia_sinensis.comp3409_5_c2_seq5_m.9186     | probable serine/threonine-kinase DDB_G0276461 [Solanum tuberosum]         | 50.746 | 6.7516 | 6    | 2 | 2  | 2 | 1.031 | 1.142 | 1.047 | 0.963 | 0.901 | 0.906 | 0.86  | 1.73E-02 |
|                                                     | PREDICT<br>ED:                                                            |        |        |      |   |    |   |       |       |       |       |       |       |       |          |
| cds.Camellia_sinensis.comp3409_6_c0_seq1_m.9195     | CAAX prenyl protease 1 homolog [Ipomoea nil]                              | 48.48  | 12.5   | 12.7 | 5 | 8  | 5 | 0.927 | 0.936 | 0.982 | 0.996 | 1.138 | 1.049 | 1.119 | 5.99E-02 |
|                                                     | PREDICT<br>ED:                                                            |        |        |      |   |    |   |       |       |       |       |       |       |       |          |
| cds.Camellia_sinensis.comp3409_9_c1_seq1_m.12104    | cytosolic endo-beta-N-acetylglucosaminidase 1 isoform X3 [Vitis vinifera] | 81.311 | 64.775 | 15.7 | 9 | 14 | 9 | 0.937 | 0.986 | 0.986 | 1.041 | 1.027 | 1.045 | 1.07  | 1.87E-02 |



|                                                     |                                                                                         |        |        |      |   |    |   |       |       |       |       |       |       |       |          |
|-----------------------------------------------------|-----------------------------------------------------------------------------------------|--------|--------|------|---|----|---|-------|-------|-------|-------|-------|-------|-------|----------|
| cds.Camellia_sinensis.comp3411_1_c0_seq1_m.15589    | PREDICTED:<br>carotene epsilon-monooxygenase, chloroplastic isoform X1 [Vitis vinifera] | 62.123 | 71.213 | 16.2 | 8 | 12 | 8 | 1.056 | 1.026 | 1.007 | 0.951 | 0.976 | 0.979 | 0.941 | 2.14E-02 |
| cds.Camellia_sinensis.comp3411_2_c0_seq1_m.1183     | PREDICTED: UDP-glucose:glucosyltransferase isoform X2 [Vitis vinifera]                  | 126.55 | 47.391 | 9.3  | 9 | 10 | 9 | 1.088 | 1.063 | 1.082 | 0.951 | 0.916 | 0.902 | 0.856 | 8.39E-04 |
| cds.Camellia_sinensis.comp3411_2_c0_seq1_m.1184     | PREDICTED: UDP-glucose:glucosyltransferase isoform X1 [Solanum tuberosum]               | 61.979 | 20.19  | 10.9 | 6 | 6  | 6 | 1.086 | 1.095 | 1.135 | 0.946 | 0.858 | 0.9   | 0.815 | 2.82E-03 |
| cds.Camellia_sinensis.comp3411_4_c0_seq1_3_m.3507_8 | PREDICTED: polyol transporter 5 [Theobroma cacao]                                       | 37.876 | 4.2453 | 9    | 3 | 4  | 3 | 0.973 | 1.039 | 1.075 | 0.927 | 1.012 | 0.978 | 0.945 | 2.20E-01 |

|                                                  |                                                                                                          |        |        |      |    |    |    |       |       |       |       |       |       |       |          |
|--------------------------------------------------|----------------------------------------------------------------------------------------------------------|--------|--------|------|----|----|----|-------|-------|-------|-------|-------|-------|-------|----------|
|                                                  | PREDICT                                                                                                  |        |        |      |    |    |    |       |       |       |       |       |       |       |          |
|                                                  | ED:                                                                                                      |        |        |      |    |    |    |       |       |       |       |       |       |       |          |
| cds.Camellia_sinensis.comp3411_6_c0_seq2_m.4556  | coatomer subunit beta'-2 isoform X1 [Ricinus communis]                                                   | 104.45 | 20.525 | 8.1  | 6  | 6  | 6  | 1.066 | 1.107 | 1.038 | 0.965 | 0.874 | 0.99  | 0.881 | 3.93E-02 |
|                                                  | PREDICT                                                                                                  |        |        |      |    |    |    |       |       |       |       |       |       |       |          |
|                                                  | ED:                                                                                                      |        |        |      |    |    |    |       |       |       |       |       |       |       |          |
| cds.Camellia_sinensis.comp3411_7_c0_seq1_m.2876  | extensin isoform X1 [Vitis vinifera]                                                                     | 21.63  | 2.8677 | 7.1  | 1  | 1  | 1  | 1.11  | 1.095 | 1.006 | 0.89  | 0.901 | 0.975 | 0.861 | 2.38E-02 |
|                                                  | PREDICT                                                                                                  |        |        |      |    |    |    |       |       |       |       |       |       |       |          |
|                                                  | ED:                                                                                                      |        |        |      |    |    |    |       |       |       |       |       |       |       |          |
| cds.Camellia_sinensis.comp3412_0_c0_seq1_m.4606  | glucose-1-phosphate adenylyltransferase small subunit, chloroplastic/amyloplastic [Nicotiana sylvestris] | 56.727 | 230.67 | 53.6 | 21 | 67 | 21 | 1.083 | 1.044 | 1.046 | 0.926 | 0.938 | 0.944 | 0.885 | 7.59E-04 |
|                                                  | PREDICT                                                                                                  |        |        |      |    |    |    |       |       |       |       |       |       |       |          |
|                                                  | ED: serine carboxypeptidase-like 17 [Juglans regia]                                                      |        |        |      |    |    |    |       |       |       |       |       |       |       |          |
| cds.Camellia_sinensis.comp3412_0_c1_seq1_m.21354 |                                                                                                          | 59.467 | 70.042 | 18.7 | 9  | 17 | 7  | 1.066 | 0.997 | 1.088 | 0.957 | 0.923 | 0.972 | 0.905 | 3.13E-02 |

|                                                  |                                                                             |        |        |      |    |    |   |       |       |       |       |       |       |       |          |
|--------------------------------------------------|-----------------------------------------------------------------------------|--------|--------|------|----|----|---|-------|-------|-------|-------|-------|-------|-------|----------|
| cds.Camellia_sinensis.comp3412_1_c0_seq1_m.11319 | cystathionine gamma synthase [Solanum lycopersicum]                         | 61.571 | 42.812 | 13.6 | 7  | 9  | 4 | 0.962 | 0.854 | 0.97  | 1.105 | 1.071 | 1.095 | 1.174 | 1.84E-02 |
| cds.Camellia_sinensis.comp3412_1_c0_seq2_m.17596 | cystathionine gamma synthase [Solanum lycopersicum]                         | 61.6   | 33.408 | 12   | 7  | 8  | 4 | 0.948 | 0.963 | 0.908 | 1.045 | 1.089 | 1.059 | 1.133 | 4.30E-03 |
| cds.Camellia_sinensis.comp3412_3_c0_seq1_m.23759 | PREDICTED: bifunctional nitrilase/nitrile hydratase NIT4A [Citrus sinensis] | 41.769 | 40.315 | 18.1 | 6  | 7  | 6 | 1.017 | 1.02  | 0.951 | 1.033 | 0.953 | 0.987 | 0.995 | 8.84E-01 |
| cds.Camellia_sinensis.comp3412_3_c1_seq1_m.6016  | PREDICTED: heat shock protein 83 [Populus euphratica]                       | 81.075 | 57.041 | 22   | 17 | 33 | 9 | 1.011 | 1.064 | 1.039 | 0.998 | 0.926 | 0.956 | 0.925 | 4.05E-02 |
| cds.Camellia_sinensis.comp3412_3_c1_seq4_m.18635 | PREDICTED: eukaryotic initiation factor 4A-14 [Sesamum indicum]             | 22.008 | 49.11  | 33.5 | 7  | 25 | 2 | 0.94  | 0.873 | 0.9   | 1.063 | 1.098 | 1.119 | 1.209 | 1.92E-03 |



|                                                 |                                                                                          |        |        |      |    |    |    |       |       |       |       |       |       |       |          |
|-------------------------------------------------|------------------------------------------------------------------------------------------|--------|--------|------|----|----|----|-------|-------|-------|-------|-------|-------|-------|----------|
| cds.Camellia_sinensis.comp34123_c1_seq6_m.19320 | PREDICT<br>ED:<br>eukaryotic initiation factor 4A-6-like<br>[Nicotiana tabacum]          | 25.518 | 8.2718 | 41   | 10 | 26 | 3  | 0.928 | 0.985 | 0.958 | 1.082 | 0.959 | 1.079 | 1.087 | 1.32E-01 |
| cds.Camellia_sinensis.comp34128_c0_seq3_m.18780 | PREDICT<br>ED:<br>prolycopen<br>e isomerase, chloroplast isoform X1<br>[Juglans regia]   | 33.855 | 16.813 | 13.2 | 3  | 5  | 3  | 1.011 | 1.031 | 1.112 | 1.009 | 0.92  | 0.918 | 0.903 | 7.37E-02 |
| cds.Camellia_sinensis.comp34128_c0_seq3_m.18781 | PREDICT<br>ED:<br>prolycopen<br>e isomerase, chloroplast isoform X1<br>[Jatropha curcas] | 32.556 | 8.6008 | 9.1  | 3  | 3  | 3  | 0.979 | 1.059 | 1.157 | 0.918 | 1.041 | 0.848 | 0.879 | 1.64E-01 |
| cds.Camellia_sinensis.comp34132_c1_seq1_m.26547 | PREDICT<br>ED: ruvB-like protein 1<br>[Glycine max]                                      | 50.618 | 55.934 | 29.3 | 11 | 15 | 11 | 0.978 | 1.023 | 0.971 | 1.01  | 0.995 | 1.028 | 1.021 | 3.38E-01 |







|                                                                                                                 |                   |        |        |      |    |    |    |       |       |       |       |       |       |       |          |
|-----------------------------------------------------------------------------------------------------------------|-------------------|--------|--------|------|----|----|----|-------|-------|-------|-------|-------|-------|-------|----------|
| cds.Camellia_sinensis.comp3416                                                                                  | 5_c0_seq4_m.51327 | 13.092 | 2.3417 | 6.7  | 1  | 1  | 1  | 0.925 | 0.887 | 1.083 | 1.085 | 0.986 | 1.062 | 1.082 | 2.91E-01 |
| PREDICTED:<br>solanesyl diphosphate synthase 3,<br>chloroplast/mitochondrial-like,<br>partial [Ziziphus jujuba] |                   |        |        |      |    |    |    |       |       |       |       |       |       |       |          |
| cds.Camellia_sinensis.comp3416                                                                                  | 5_c1_seq1_m.2418  | 39.089 | 115.22 | 36.9 | 13 | 41 | 13 | 1.011 | 0.978 | 1.014 | 0.977 | 1.006 | 0.991 | 0.99  | 5.38E-01 |
| PREDICTED: malate dehydrogenase [NADP],<br>chloroplast-like [Juglans regia]                                     |                   |        |        |      |    |    |    |       |       |       |       |       |       |       |          |
| cds.Camellia_sinensis.comp3416                                                                                  | 6_c1_seq1_m.6035  | 77.526 | 27.744 | 11.6 | 9  | 13 | 9  | 1.026 | 1.061 | 1.058 | 0.945 | 0.952 | 0.948 | 0.905 | 7.97E-04 |
| PREDICTED: 1,4-alpha-glucan-branching enzyme 2-2,<br>chloroplast/amyloplastic [Jatropha curcas]                 |                   |        |        |      |    |    |    |       |       |       |       |       |       |       |          |





|                                                  |                                                               |        |        |      |   |   |   |       |       |       |       |       |       |       |          |
|--------------------------------------------------|---------------------------------------------------------------|--------|--------|------|---|---|---|-------|-------|-------|-------|-------|-------|-------|----------|
|                                                  | PREDICT<br>ED:                                                |        |        |      |   |   |   |       |       |       |       |       |       |       |          |
| cds.Camellia_sinensis.comp3419_0_c0_seq1_m.8571  | nuclear pore complex protein NUP93A [Vitis vinifera]          | 78.532 | 12.872 | 10.1 | 7 | 8 | 7 | 0.997 | 1.008 | 0.948 | 1.041 | 0.959 | 1.06  | 1.036 | 3.88E-01 |
|                                                  | PREDICT<br>ED:                                                |        |        |      |   |   |   |       |       |       |       |       |       |       |          |
| cds.Camellia_sinensis.comp3419_0_c0_seq6_m.52408 | nuclear pore complex protein NUP93A-like [Camelina sativa]    | 18.523 | 12.529 | 13.4 | 2 | 3 | 2 | 0.963 | 0.988 | 0.998 | 1.046 | 0.996 | 1.058 | 1.051 | 8.05E-02 |
|                                                  | PREDICT<br>ED:                                                |        |        |      |   |   |   |       |       |       |       |       |       |       |          |
| cds.Camellia_sinensis.comp3419_2_c0_seq1_m.6581  | protein pleiotropic regulatory locus 1 [Vitis vinifera]       | 50.665 | 3.2312 | 2.9  | 1 | 1 | 1 | 0.886 | 1.052 | 0.957 | 1.077 | 0.984 | 1.072 | 1.082 | 2.35E-01 |
|                                                  | PREDICT<br>ED:                                                |        |        |      |   |   |   |       |       |       |       |       |       |       |          |
| cds.Camellia_sinensis.comp3419_5_c1_seq1_m.37697 | nucleosome assembly protein 1;4 isoform X3 [Nelumbo nucifera] | 34.725 | 6.474  | 3.6  | 1 | 1 | 1 | 0.872 | 1.109 | 0.915 | 0.93  | 1.145 | 1.052 | 1.08  | 4.55E-01 |





|                                                  |                                                                                                          |        |        |      |    |     |    |       |       |       |       |       |       |       |          |
|--------------------------------------------------|----------------------------------------------------------------------------------------------------------|--------|--------|------|----|-----|----|-------|-------|-------|-------|-------|-------|-------|----------|
| cds.Camellia_sinensis.comp3420.3_c0_seq1_m.10841 | PREDICTED:<br>protein<br>SIEVE<br>ELEMENT<br>T<br>OCCLUSION B-like<br>[Juglans regia]                    | 86.102 | 169.64 | 29.8 | 23 | 107 | 22 | 0.94  | 0.94  | 0.93  | 1.069 | 1.084 | 1.083 | 1.152 | 1.81E-05 |
| cds.Camellia_sinensis.comp3420.3_c0_seq2_m.52934 | PREDICTED:<br>protein<br>SIEVE<br>ELEMENT<br>T<br>OCCLUSION B<br>[Vitis vinifera]                        | 18.907 | 3.1796 | 13.2 | 2  | 5   | 1  | 0.879 | 0.995 | 0.922 | 1.085 | 1.156 | 1.002 | 1.16  | 5.44E-02 |
| cds.Camellia_sinensis.comp3420.5_c0_seq7_m.3600  | PREDICTED:<br>protein<br>translocase subunit<br>SECA2,<br>chloroplast isoform<br>X2<br>[Cucumis sativus] | 30.71  | 2.5828 | 3.7  | 1  | 1   | 1  | 0.974 | 0.944 | 1.077 | 1.065 | 0.974 | 0.985 | 1.01  | 8.41E-01 |
| cds.Camellia_sinensis.comp3421.5_c0_seq4_m.366   | PREDICTED:<br>proteasome activator<br>subunit 4<br>[Vitis vinifera]                                      | 189.89 | 42.092 | 7.2  | 11 | 11  | 11 | 0.975 | 1.012 | 1.017 | 0.99  | 1.018 | 0.992 | 0.999 | 9.42E-01 |

|                                                   |                                                                         |        |        |      |   |    |   |       |       |       |       |       |       |       |          |
|---------------------------------------------------|-------------------------------------------------------------------------|--------|--------|------|---|----|---|-------|-------|-------|-------|-------|-------|-------|----------|
| cds.Camellia_sinensis.comp34215_c0_seq58_m.4272_2 | PREDICTED: proteasome activator subunit 4 [Solanum tuberosum]           | 13.701 | 3.7334 | 13.6 | 2 | 2  | 2 | 0.925 | 1.074 | 1.057 | 0.887 | 1.031 | 1.033 | 0.966 | 6.37E-01 |
| cds.Camellia_sinensis.comp34219_c0_seq6_m.53809   | PREDICTED: D-aminoacyl-tRNA deacylase-like isoform X1 [Sesamum indicum] | 12.778 | 1.4169 | 12.5 | 1 | 1  | 1 |       |       |       |       |       |       |       |          |
| cds.Camellia_sinensis.comp34220_c1_seq1_m.11670   | PREDICTED: GTP-binding protein TypA/BipA homolog [Citrus]               | 76.152 | 87.425 | 14.1 | 8 | 11 | 8 | 0.994 | 0.99  | 0.97  | 1.028 | 1.025 | 0.997 | 1.032 | 6.08E-02 |
| cds.Camellia_sinensis.comp34223_c0_seq1_m.7172    | PREDICTED: WD repeat-containing protein 48 isoform X2 [Vitis vinifera]  | 83.43  | 3.5801 | 3.1  | 3 | 3  | 3 | 0.996 | 1.033 | 0.94  | 0.945 | 1.053 | 1.039 | 1.023 | 6.38E-01 |

|                                |                                                                                   |        |        |      |    |    |    |       |       |       |       |       |       |       |          |
|--------------------------------|-----------------------------------------------------------------------------------|--------|--------|------|----|----|----|-------|-------|-------|-------|-------|-------|-------|----------|
| cds.Camellia_sinensis.comp3422 | vacuolar protein sorting-associated protein 53 A isoform X1 [Vitis vinifera]      | 91.929 | 9.1242 | 4.4  | 3  | 3  | 3  | 1.076 | 1.012 | 1.009 | 0.898 | 0.919 | 1.073 | 0.933 | 2.95E-01 |
| cds.Camellia_sinensis.comp3423 | ubiquitin-like modifier-activating enzyme 5 isoform X1 [Theobroma cacao] Inactive | 49.031 | 10.752 | 10.1 | 4  | 7  | 4  | 0.958 | 0.987 | 1.007 | 1.055 | 1.011 | 1.034 | 1.05  | 6.16E-02 |
| cds.Camellia_sinensis.comp3423 | ubiquitin carboxyl-terminal hydrolase 54 [Morus notabilis]                        | 147.88 | 2.0751 | 0.8  | 1  | 1  | 1  |       |       |       |       |       |       |       |          |
| cds.Camellia_sinensis.comp3423 | dehydrogenase [cytochrome], mitochondrial [Sesamum indicum]                       | 62.078 | 27.377 | 17.7 | 10 | 12 | 10 | 1.016 | 0.985 | 0.999 | 0.939 | 1.025 | 1.012 | 0.992 | 7.78E-01 |

|                                                  |                                                               |        |        |      |    |    |   |       |       |       |       |       |       |       |          |
|--------------------------------------------------|---------------------------------------------------------------|--------|--------|------|----|----|---|-------|-------|-------|-------|-------|-------|-------|----------|
|                                                  | PREDICT                                                       |        |        |      |    |    |   |       |       |       |       |       |       |       |          |
|                                                  | ED:                                                           |        |        |      |    |    |   |       |       |       |       |       |       |       |          |
| cds.Camellia_sinensis.comp3423_3_c0_seq8_m.18519 | insulin-degrading enzyme-like 1, peroxisomal [Vitis vinifera] | 63.407 | 14.863 | 9.4  | 6  | 8  | 6 | 0.934 | 0.961 | 0.981 | 1.064 | 1.042 | 1.045 | 1.096 | 4.28E-03 |
|                                                  | PREDICT                                                       |        |        |      |    |    |   |       |       |       |       |       |       |       |          |
|                                                  | ED: long                                                      |        |        |      |    |    |   |       |       |       |       |       |       |       |          |
| cds.Camellia_sinensis.comp3423_4_c0_seq1_m.9086  | chain acyl-CoA synthetase 6, peroxisomal [Vitis vinifera]     | 76.776 | 52.236 | 17.5 | 10 | 12 | 8 | 0.927 | 0.937 | 0.912 | 1.092 | 1.058 | 1.052 | 1.153 | 5.22E-04 |
|                                                  | PREDICT                                                       |        |        |      |    |    |   |       |       |       |       |       |       |       |          |
|                                                  | ED: long                                                      |        |        |      |    |    |   |       |       |       |       |       |       |       |          |
| cds.Camellia_sinensis.comp3423_4_c0_seq2_m.11139 | chain acyl-CoA synthetase 4 [Sesamum indicum]                 | 47.856 | 17.676 | 16   | 8  | 11 | 8 | 0.957 | 0.945 | 1.024 | 1.028 | 1.02  | 1.066 | 1.064 | 9.17E-02 |
|                                                  | PREDICT                                                       |        |        |      |    |    |   |       |       |       |       |       |       |       |          |
|                                                  | ED: long                                                      |        |        |      |    |    |   |       |       |       |       |       |       |       |          |
| cds.Camellia_sinensis.comp3423_4_c0_seq4_m.33542 | chain acyl-CoA synthetase 6, peroxisomal [Ipomoea nil]        | 42.515 | 3.6646 | 9.1  | 3  | 4  | 1 | 1.017 | 1     | 0.951 | 1.061 | 0.946 | 1.036 | 1.025 | 5.82E-01 |

|                                                     |                                                                                   |        |        |      |   |    |   |       |       |       |       |       |       |       |          |
|-----------------------------------------------------|-----------------------------------------------------------------------------------|--------|--------|------|---|----|---|-------|-------|-------|-------|-------|-------|-------|----------|
| cds.Camellia_sinensis.comp3423_4_c0_seq5_m.34016    | PREDICT<br>ED: long chain acyl-CoA synthetase 4<br>[Camelina sativa]              | 18.244 | 19.357 | 28.2 | 5 | 8  | 5 | 0.978 | 0.991 | 0.955 | 1.047 | 1.025 | 1.017 | 1.056 | 1.67E-02 |
| cds.Camellia_sinensis.comp3423_4_c1_seq1_m.26920    | PREDICT<br>ED: protein DJ-1 homolog B-like<br>[Gossypium raimondii]               | 28.292 | 38.337 | 46   | 9 | 21 | 9 | 0.989 | 0.981 | 0.942 | 1.048 | 1.048 | 1.04  | 1.077 | 8.24E-03 |
| cds.Camellia_sinensis.comp3423_4_c1_seq1_m.26921    | PREDICT<br>ED: protein DJ-1 homolog B-like<br>[Gossypium hirsutum]                | 20.874 | 20.78  | 10.7 | 3 | 6  | 3 | 1.007 | 0.969 | 1.005 | 1.006 | 0.972 | 1.044 | 1.014 | 6.08E-01 |
| cds.Camellia_sinensis.comp3423_5_c0_seq1_2_m.3653_9 | PREDICT<br>ED: nuclear transcription factor Y subunit C-9-like<br>[Juglans regia] | 27.116 | 4.6883 | 12   | 3 | 4  | 2 | 0.824 | 0.979 | 0.938 | 1.111 | 1.066 | 1.13  | 1.206 | 2.54E-02 |



|                                |                                                                       |        |        |      |    |    |    |       |       |       |       |       |       |       |          |
|--------------------------------|-----------------------------------------------------------------------|--------|--------|------|----|----|----|-------|-------|-------|-------|-------|-------|-------|----------|
| cds.Camellia_sinensis.comp3424 | PREDICT<br>ED: ALG-2<br>interacting protein X [Vitis vinifera]        | 77.238 | 32.773 | 14.7 | 10 | 13 | 8  | 0.988 | 1.023 | 0.988 | 1.062 | 1.074 | 0.957 | 1.031 | 4.84E-01 |
| cds.Camellia_sinensis.comp3424 | PREDICT<br>ED: ALG-2<br>interacting protein X [Vitis vinifera] serine | 33.68  | 2.3031 | 8.4  | 3  | 4  | 1  | 1.06  | 0.98  | 0.898 | 1.08  | 1.047 | 0.947 | 1.046 | 5.01E-01 |
| cds.Camellia_sinensis.comp3425 | carboxypeptidase S10 family protein [Populus trichocarpa]             | 54.234 | 12.881 | 5.8  | 2  | 3  | 2  | 1.024 | 1.075 | 1.024 | 0.969 | 0.961 | 0.945 | 0.921 | 9.76E-03 |
| cds.Camellia_sinensis.comp3425 | transducin family protein [Populus trichocarpa]                       | 164.82 | 36.503 | 7.7  | 11 | 13 | 11 | 0.973 | 1.05  | 0.962 | 1.028 | 1.012 | 1.006 | 1.02  | 4.99E-01 |
| cds.Camellia_sinensis.comp3425 | PREDICT<br>ED: actin-depolymerizing factor 2 [Nelumbo nucifera]       | 15.575 | 7.7002 | 17.3 | 2  | 3  | 1  | 1.202 | 1.063 | 0.878 | 0.889 | 0.922 | 1.015 | 0.899 | 3.74E-01 |





|                                |                                                                                                               |        |        |      |   |    |   |       |       |       |       |       |       |       |          |
|--------------------------------|---------------------------------------------------------------------------------------------------------------|--------|--------|------|---|----|---|-------|-------|-------|-------|-------|-------|-------|----------|
| cds.Camellia_sinensis.comp3426 | PREDICT<br>ED: cleft<br>lip and<br>palate<br>transmembrane<br>protein 1<br>homolog<br>[Populus<br>euphratica] | 70.701 | 4.2399 | 3.9  | 2 | 3  | 2 | 1.011 | 1.212 | 1.057 | 1.226 | 0.716 | 0.782 | 0.83  | 2.94E-01 |
| cds.Camellia_sinensis.comp3427 | PREDICT<br>ED: far<br>upstream<br>element-<br>binding<br>protein 1<br>isoform<br>X2 [Vitis<br>vinifera]       | 43.512 | 50.677 | 29.9 | 8 | 13 | 2 | 0.984 | 1.067 | 0.943 | 0.896 | 1.004 | 1.107 | 1.004 | 9.80E-01 |
| cds.Camellia_sinensis.comp3427 | PREDICT<br>ED: far<br>upstream<br>element-<br>binding<br>protein 1<br>isoform<br>X2 [Vitis<br>vinifera]       | 43.918 | 11.689 | 30.2 | 7 | 12 | 1 |       |       |       |       |       |       |       |          |
| cds.Camellia_sinensis.comp3427 | PREDICT<br>ED: N-<br>carbamoyl<br>putrescine<br>amidase-<br>like<br>[Juglans<br>regia]                        | 33.158 | 35.213 | 21.5 | 5 | 9  | 5 | 0.962 | 0.924 | 0.948 | 1.081 | 1.057 | 1.069 | 1.132 | 7.77E-04 |





|                                                  |                                                                                            |        |        |      |    |    |    |       |       |       |       |       |       |       |          |
|--------------------------------------------------|--------------------------------------------------------------------------------------------|--------|--------|------|----|----|----|-------|-------|-------|-------|-------|-------|-------|----------|
| cds.Camellia_sinensis.comp3429_4_c4_seq1_m.1774  | PREDICT<br>ED: alpha-glucan water dikinase, chloroplast isoform X1 [Vitis vinifera]        | 158.71 | 135.59 | 21.4 | 28 | 36 | 28 | 1.047 | 1.032 | 1.064 | 0.955 | 0.964 | 0.928 | 0.906 | 2.38E-03 |
| cds.Camellia_sinensis.comp3429_4_c4_seq7_m.53283 | PREDICT<br>ED: plant UBX domain-containing protein 8-like isoform X1 [Nicotiana attenuata] | 13.459 | 5.8208 | 27.4 | 3  | 3  | 3  | 1.015 | 1.083 | 1.084 | 0.911 | 0.937 | 0.961 | 0.883 | 9.56E-03 |
| cds.Camellia_sinensis.comp3429_5_c0_seq1_m.18899 | PREDICT<br>ED: serine carboxypeptidase-like 40 [Citrus sinensis]                           | 56.083 | 11.229 | 10.8 | 4  | 4  | 4  | 0.963 | 0.99  | 1.103 | 1.011 | 0.957 | 0.989 | 0.968 | 5.18E-01 |
| cds.Camellia_sinensis.comp3429_7_c0_seq1_m.1942  | PREDICT<br>ED: Niemann-Pick C1 protein [Vitis vinifera]                                    | 142.73 | 7.8943 | 3.2  | 4  | 4  | 4  | 1.02  | 1.006 | 1.083 | 1.033 | 0.955 | 0.908 | 0.931 | 1.76E-01 |

|                                                  |                                                                                                     |        |        |      |   |   |   |       |       |       |       |       |       |       |          |
|--------------------------------------------------|-----------------------------------------------------------------------------------------------------|--------|--------|------|---|---|---|-------|-------|-------|-------|-------|-------|-------|----------|
| cds.Camellia_sinensis.comp3429_7_c0_seq7_m.2291  | PREDICT<br>ED:<br>Niemann-Pick C1 protein isoform X2 [Vitis vinifera]                               | 86.649 | 5.5979 | 1.4  | 1 | 1 | 1 | 1.062 | 1.111 | 0.997 | 0.933 | 0.965 | 0.921 | 0.889 | 2.74E-02 |
| cds.Camellia_sinensis.comp3429_7_c0_seq7_m.2292  | PREDICT<br>ED:<br>Niemann-Pick C1 protein isoform X2 [Vitis vinifera]                               | 35.217 | 2.4454 | 6.2  | 1 | 1 | 1 | 1.107 | 0.924 | 0.922 | 0.96  | 1.044 | 1.042 | 1.031 | 6.37E-01 |
| cds.Camellia_sinensis.comp3429_8_c0_seq3_m.11240 | PREDICT<br>ED:<br>exocyst complex component SEC6 [Vitis vinifera]                                   | 88.748 | 9.3636 | 5.2  | 4 | 5 | 4 | 0.984 | 1.044 | 1.047 | 0.989 | 0.97  | 0.971 | 0.953 | 8.64E-02 |
| cds.Camellia_sinensis.comp3429_9_c2_seq4_m.53960 | PREDICT<br>ED:<br>photosynthetic NDH subunit of lumenal location 5, chloroplastic [Ziziphus jujuba] | 15.568 | 5.7357 | 19.7 | 2 | 5 | 1 | 1.055 | 1.139 | 1.009 | 0.944 | 0.892 | 0.947 | 0.869 | 2.58E-02 |

|                                                  |                                                                            |        |        |      |    |    |   |       |       |       |       |       |       |       |          |
|--------------------------------------------------|----------------------------------------------------------------------------|--------|--------|------|----|----|---|-------|-------|-------|-------|-------|-------|-------|----------|
|                                                  | PREDICT<br>ED:                                                             |        |        |      |    |    |   |       |       |       |       |       |       |       |          |
| cds.Camellia_sinensis.comp3429_9_c3_seq1_m.27800 | mitochondrial outer membrane protein porin of 34 kDa [Nicotiana attenuata] | 29.486 | 89.402 | 33   | 10 | 25 | 6 | 1.023 | 0.979 | 0.96  | 0.978 | 1.022 | 1.018 | 1.019 | 4.66E-01 |
|                                                  | PREDICT<br>ED:                                                             |        |        |      |    |    |   |       |       |       |       |       |       |       |          |
| cds.Camellia_sinensis.comp3429_9_c3_seq2_m.31009 | mitochondrial outer membrane protein porin of 34 kDa [Nicotiana attenuata] | 31.604 | 127.01 | 43.4 | 12 | 28 | 8 | 1.003 | 0.963 | 0.988 | 0.994 | 1.019 | 1.011 | 1.024 | 1.67E-01 |
| cds.Camellia_sinensis.comp3430_3_c0_seq1_m.1171  | Serine/threonine-protein kinase [Morus notabilis]                          | 128.74 | 11.375 | 4.8  | 6  | 6  | 4 | 0.943 | 1.094 | 0.977 | 1.01  | 0.952 | 1     | 0.983 | 7.62E-01 |
|                                                  | PREDICT<br>ED: MLP-like                                                    |        |        |      |    |    |   |       |       |       |       |       |       |       |          |
| cds.Camellia_sinensis.comp3430_3_c0_seq1_m.1172  | protein 423 isoform X2 [Ziziphus jujuba]                                   | 17.014 | 106.91 | 51.7 | 9  | 20 | 9 | 1.255 | 1.332 | 1.276 | 0.671 | 0.675 | 0.674 | 0.523 | 7.58E-04 |





|                                                     |                                                             |        |        |      |   |   |   |       |       |       |       |       |       |       |          |
|-----------------------------------------------------|-------------------------------------------------------------|--------|--------|------|---|---|---|-------|-------|-------|-------|-------|-------|-------|----------|
|                                                     | PREDICT                                                     |        |        |      |   |   |   |       |       |       |       |       |       |       |          |
|                                                     | ED:                                                         |        |        |      |   |   |   |       |       |       |       |       |       |       |          |
| cds.Camellia_sinensis.comp3432_3_c2_seq1_m.31968    | poly(rC)-binding protein 4-like [Nicotiana tomentosiformis] | 29.299 | 1.2756 | 3.6  | 1 | 1 | 1 | 0.933 | 1.062 | 1.03  | 1.061 | 0.957 | 0.975 | 0.989 | 8.50E-01 |
|                                                     | PREDICT                                                     |        |        |      |   |   |   |       |       |       |       |       |       |       |          |
|                                                     | ED: DNA                                                     |        |        |      |   |   |   |       |       |       |       |       |       |       |          |
| cds.Camellia_sinensis.comp3432_8_c0_seq2_0_m.1522_4 | polymerase delta catalytic subunit [Sesamum indicum]        | 70.096 | 1.3498 | 1.3  | 1 | 1 | 1 | 1.015 | 0.983 | 0.985 | 0.987 | 1.023 | 1.014 | 1.014 | 4.13E-01 |
|                                                     | PREDICT                                                     |        |        |      |   |   |   |       |       |       |       |       |       |       |          |
|                                                     | ED:                                                         |        |        |      |   |   |   |       |       |       |       |       |       |       |          |
| cds.Camellia_sinensis.comp3433_1_c1_seq1_m.11534    | transmembrane 9 superfamily member 7 [Glycine max]          | 57.195 | 8.8688 | 4.8  | 2 | 2 | 1 | 1.071 | 1.092 | 0.972 | 1.058 | 0.895 | 0.909 | 0.913 | 2.23E-01 |
|                                                     | PREDICT                                                     |        |        |      |   |   |   |       |       |       |       |       |       |       |          |
|                                                     | ED:                                                         |        |        |      |   |   |   |       |       |       |       |       |       |       |          |
| cds.Camellia_sinensis.comp3433_1_c1_seq2_m.12395    | transmembrane 9 superfamily member 7 [Gossypium hirsutum]   | 13.744 | 27.575 | 18.2 | 2 | 3 | 1 | 0.987 | 1.023 | 1.033 | 1.055 | 1.003 | 0.912 | 0.976 | 5.95E-01 |

|                                                  |                                                                                      |        |        |     |    |    |    |       |       |       |       |       |       |       |          |
|--------------------------------------------------|--------------------------------------------------------------------------------------|--------|--------|-----|----|----|----|-------|-------|-------|-------|-------|-------|-------|----------|
| cds.Camellia_sinensis.comp3433_5_c1_seq1_m.24901 | PREDICT<br>ED: beta-hexosaminidase 2 [Vitis vinifera]                                | 55.016 | 3.6431 | 4.2 | 2  | 2  | 2  | 1.039 | 1.144 | 1.103 | 1.021 | 0.787 | 0.893 | 0.822 | 6.65E-02 |
| cds.Camellia_sinensis.comp3433_7_c0_seq1_m.6146  | PREDICT<br>ED: helicase-like transcription factor CHR28 isoform X1 [Vitis vinifera]  | 98.952 | 11.483 | 1.6 | 1  | 1  | 1  | 0.951 | 0.914 | 0.922 | 1.12  | 1.117 | 1.013 | 1.166 | 1.22E-02 |
| cds.Camellia_sinensis.comp3434_1_c0_seq3_m.4779  | PREDICT<br>ED: importin beta-like SAD2 [Ziziphus jujuba]                             | 52.991 | 5.4683 | 5   | 2  | 2  | 2  |       |       |       |       |       |       |       |          |
| cds.Camellia_sinensis.comp3434_2_c0_seq1_m.3848  | PREDICT<br>ED: probable starch synthase 4, chloroplast/amyloplastic [Vitis vinifera] | 114.51 | 24.798 | 9.2 | 7  | 9  | 7  | 0.995 | 1.166 | 1.047 | 0.95  | 0.916 | 0.948 | 0.877 | 5.55E-02 |
| cds.Camellia_sinensis.comp3434_3_c0_seq1_m.1828  | PREDICT<br>ED: dentin sialoprophosphoprotein [Populus trichocarpa]                   | 164.05 | 35.27  | 8.7 | 12 | 13 | 12 | 1.025 | 1.062 | 1.039 | 1.022 | 0.962 | 0.952 | 0.939 | 6.10E-02 |





|                                                  |                                                                                                       |        |        |      |    |    |    |       |       |       |       |       |       |       |          |
|--------------------------------------------------|-------------------------------------------------------------------------------------------------------|--------|--------|------|----|----|----|-------|-------|-------|-------|-------|-------|-------|----------|
| cds.Camellia_sinensis.comp3437_4_c0_seq2_m.23931 | PREDICTED:<br>cytochrome c1-2, heme protein, mitochondrial<br>[Nicotiana attenuata]<br>PREDICT        | 39.537 | 96.985 | 25.6 | 6  | 19 | 4  | 0.936 | 1.047 | 0.957 | 1.073 | 0.998 | 1.035 | 1.056 | 2.38E-01 |
| cds.Camellia_sinensis.comp3437_6_c0_seq1_m.7966  | PREDICTED:<br>beta-adaptin-like protein C<br>[Solanum pennellii]<br>PREDICT                           | 87.647 | 78.468 | 17.5 | 12 | 24 | 12 | 0.966 | 0.984 | 1.019 | 1.052 | 1.027 | 0.995 | 1.035 | 1.97E-01 |
| cds.Camellia_sinensis.comp3437_6_c0_seq8_m.44486 | PREDICTED:<br>DNA-directed RNA polymerase II subunit 4<br>[Jatropha]<br>PREDICT                       | 13.233 | 2.8975 | 14.9 | 2  | 3  | 2  | 0.983 | 0.949 | 0.941 | 1.033 | 1.02  | 1.092 | 1.095 | 2.22E-02 |
| cds.Camellia_sinensis.comp3438_0_c0_seq3_m.15281 | PREDICTED:<br>serine/threonine-protein phosphatase 6 regulatory subunit 3 isoform X4 [Vitis vinifera] | 74.971 | 2.2651 | 3.2  | 2  | 2  | 2  | 1.193 | 1.072 | 1.09  | 0.746 | 0.859 | 0.992 | 0.774 | 4.20E-02 |

|                                                  |                                                                                               |        |        |      |    |    |    |       |       |       |       |       |       |       |          |
|--------------------------------------------------|-----------------------------------------------------------------------------------------------|--------|--------|------|----|----|----|-------|-------|-------|-------|-------|-------|-------|----------|
|                                                  | PREDICT<br>ED:                                                                                |        |        |      |    |    |    |       |       |       |       |       |       |       |          |
| cds.Camellia_sinensis.comp3438_4_c0_seq3_m.25787 | glycine--<br>tRNA<br>ligase 1,<br>mitochondrial-like<br>[Nicotiana<br>sylvestris]             | 51.633 | 17.204 | 31.7 | 13 | 22 | 4  | 0.95  | 0.931 | 0.938 | 1.057 | 1.075 | 1.052 | 1.129 | 1.60E-04 |
|                                                  | PREDICT<br>ED:                                                                                |        |        |      |    |    |    |       |       |       |       |       |       |       |          |
| cds.Camellia_sinensis.comp3438_4_c1_seq7_m.22974 | conserved<br>oligomeric<br>Golgi<br>complex<br>subunit 1<br>[Vitis<br>vinifera]               | 46.186 | 14.842 | 4.4  | 2  | 2  | 2  | 1.06  | 1.019 | 1.081 | 0.89  | 1     | 0.939 | 0.895 | 4.23E-02 |
|                                                  | PREDICT<br>ED: 26S                                                                            |        |        |      |    |    |    |       |       |       |       |       |       |       |          |
| cds.Camellia_sinensis.comp3438_6_c0_seq1_m.3887  | proteasome non-<br>ATPase<br>regulatory<br>subunit 1<br>homolog<br>A [Vitis<br>vinifera]      | 103.45 | 123.65 | 16.2 | 13 | 24 | 11 | 0.983 | 0.977 | 1.003 | 1.041 | 1.004 | 1.016 | 1.033 | 7.07E-02 |
|                                                  | PREDICT<br>ED: 26S                                                                            |        |        |      |    |    |    |       |       |       |       |       |       |       |          |
| cds.Camellia_sinensis.comp3438_6_c0_seq2_m.36640 | proteasome non-<br>ATPase<br>regulatory<br>subunit 1<br>homolog<br>A-like<br>[Prunus<br>mume] | 24.693 | 32.551 | 32.9 | 7  | 12 | 5  | 0.99  | 1.012 | 0.96  | 1.018 | 0.979 | 1.02  | 1.019 | 4.15E-01 |

|                                                                                                                      |                   |        |        |     |   |   |   |       |       |       |       |       |       |       |          |
|----------------------------------------------------------------------------------------------------------------------|-------------------|--------|--------|-----|---|---|---|-------|-------|-------|-------|-------|-------|-------|----------|
| cds.Camellia_sinensis.comp3438                                                                                       | 7_c0_seq3_m.4957  | 90.027 | 3.2078 | 4.1 | 3 | 3 | 3 | 0.947 | 1.076 | 1.062 | 1.081 | 0.948 | 0.902 | 0.95  | 4.80E-01 |
| PREDICTED: ATP-dependent zinc metalloprotease FTSH 9, chloroplastic isoform X2 [Ziziphus jujuba]                     |                   |        |        |     |   |   |   |       |       |       |       |       |       |       |          |
| PREDICTED: probable serine/threonine-protein phosphatase 2A regulatory subunit B" subunit TON2 [Phoenix dactylifera] |                   |        |        |     |   |   |   |       |       |       |       |       |       |       |          |
| cds.Camellia_sinensis.comp3439                                                                                       | 1_c0_seq3_m.16332 | 54.772 | 3.6363 | 4.6 | 3 | 3 | 3 | 1.03  | 1.113 | 1.086 | 0.934 | 0.911 | 0.902 | 0.851 | 3.02E-03 |
| PREDICTED: phosphatase IMPL1, chloroplastic [Daucus carota subsp. sativus]                                           |                   |        |        |     |   |   |   |       |       |       |       |       |       |       |          |

|                                                  |                                                                                                                    |        |        |      |    |    |    |       |       |       |       |       |       |       |          |
|--------------------------------------------------|--------------------------------------------------------------------------------------------------------------------|--------|--------|------|----|----|----|-------|-------|-------|-------|-------|-------|-------|----------|
| cds.Camellia_sinensis.comp3439_4_c0_seq8_m.5071  | PREDICT<br>ED:<br>protein<br>MEI2-like<br>5 [Vitis<br>vinifera]                                                    | 71.595 | 2.5959 | 3.3  | 2  | 2  | 2  | 1.061 | 1.128 | 1.014 | 0.991 | 0.859 | 0.935 | 0.869 | 5.31E-02 |
| cds.Camellia_sinensis.comp3439_6_c0_seq2_m.38667 | PREDICT<br>ED:<br>polyadenylate-binding<br>protein 2<br>isoform<br>X1                                              | 24.789 | 24.247 | 19.9 | 4  | 5  | 3  | 1.019 | 1.052 | 0.981 | 1.018 | 0.993 | 0.943 | 0.968 | 3.40E-01 |
| cds.Camellia_sinensis.comp3439_6_c2_seq6_m.44576 | PREDICT<br>ED:<br>subtilisin-like<br>protease<br>[Sesamum<br>indicum]                                              | 15.093 | 1.458  | 11.6 | 1  | 1  | 1  |       |       |       |       |       |       |       |          |
| cds.Camellia_sinensis.comp3439_8_c0_seq1_m.2676  | PREDICT<br>ED:<br>carbamoyl-phosphate<br>synthase<br>large<br>chain,<br>chloroplast<br>ic-like<br>[Ipomoea<br>nil] | 104.3  | 124.56 | 19.2 | 17 | 30 | 17 | 0.982 | 0.984 | 0.969 | 1.022 | 1.033 | 1.018 | 1.047 | 2.12E-03 |





|                                                  |                                                                                                                    |        |        |      |    |    |    |       |       |       |       |       |       |       |          |
|--------------------------------------------------|--------------------------------------------------------------------------------------------------------------------|--------|--------|------|----|----|----|-------|-------|-------|-------|-------|-------|-------|----------|
| cds.Camellia_sinensis.comp3440_0_c0_seq4_m.8026  | PREDICTED: cullin-1 isoform X1 [Vitis vinifera]                                                                    | 86.372 | 16.424 | 7.8  | 6  | 6  | 2  |       |       |       |       |       |       |       |          |
| cds.Camellia_sinensis.comp3440_0_c0_seq9_m.12194 | PREDICTED: starch synthase 1, chloroplast isoform X2 [Theobroma cacao] thionin-like protein [Arabidopsis thaliana] | 67.174 | 39.882 | 21.9 | 12 | 21 | 11 | 1.242 | 1.24  | 1.25  | 0.718 | 0.734 | 0.744 | 0.588 | 4.87E-07 |
| cds.Camellia_sinensis.comp3440_0_c1_seq1_m.48780 | PREDICTED: NAD-dependent malic enzyme 59 kDa isoform, mitochondrial [Sesamum indicum]                              | 22.293 | 6.1601 | 14.3 | 2  | 2  | 2  | 0.947 | 1.095 | 1.066 | 0.911 | 0.891 | 1.088 | 0.93  | 3.88E-01 |
| cds.Camellia_sinensis.comp3440_1_c1_seq1_m.16024 |                                                                                                                    | 66.219 | 78.478 | 27.3 | 15 | 22 | 11 | 1.002 | 0.991 | 0.977 | 0.999 | 1.018 | 1.001 | 1.016 | 1.64E-01 |



|                       |                                                                                      |                             |        |        |      |    |    |    |       |       |       |       |       |       |       |          |
|-----------------------|--------------------------------------------------------------------------------------|-----------------------------|--------|--------|------|----|----|----|-------|-------|-------|-------|-------|-------|-------|----------|
|                       | PREDICT                                                                              |                             |        |        |      |    |    |    |       |       |       |       |       |       |       |          |
|                       | ED:                                                                                  |                             |        |        |      |    |    |    |       |       |       |       |       |       |       |          |
|                       | anthocyani                                                                           |                             |        |        |      |    |    |    |       |       |       |       |       |       |       |          |
| cds.Camellia_sinensis | din 3-O-glucosyltransferase 2-like [Daucus carota subsp. sativus]                    | .comp3440_6_c0_seq6_m.55028 | 13.482 | 1.8133 | 7.4  | 1  | 1  | 1  | 1.036 | 0.972 | 1.003 | 1.003 | 1.029 | 0.963 | 0.995 | 8.51E-01 |
|                       | PREDICT                                                                              |                             |        |        |      |    |    |    |       |       |       |       |       |       |       |          |
|                       | ED:                                                                                  |                             |        |        |      |    |    |    |       |       |       |       |       |       |       |          |
| cds.Camellia_sinensis | diaminopimelate decarboxylase 2, chloroplastic [Vitis vinifera] sulfate              | .comp3440_7_c0_seq1_m.15211 | 52.851 | 117.76 | 30.4 | 13 | 25 | 13 | 1.016 | 1.021 | 0.998 | 0.985 | 1.002 | 0.986 | 0.98  | 8.07E-02 |
| cds.Camellia_sinensis | adenylyltransferase subunit [Arabidopsis thaliana]                                   | .comp3440_9_c0_seq2_m.1102  | 23.254 | 48.53  | 12.9 | 2  | 3  | 2  | 0.914 | 0.928 | 1.01  | 1.007 | 1.048 | 1.12  | 1.113 | 7.09E-02 |
|                       | PREDICT                                                                              |                             |        |        |      |    |    |    |       |       |       |       |       |       |       |          |
|                       | ED:                                                                                  |                             |        |        |      |    |    |    |       |       |       |       |       |       |       |          |
| cds.Camellia_sinensis | ribulose biphosphate carboxylase/oxygenase activase, chloroplastic [Cicer arietinum] | .comp3441_3_c0_seq2_m.26389 | 49.902 | 28.752 | 13.8 | 6  | 8  | 6  | 1.024 | 1.058 | 1.047 | 0.894 | 0.979 | 0.951 | 0.903 | 2.23E-02 |





|                                |                                                                            |        |        |      |   |    |   |       |       |       |       |       |       |       |          |
|--------------------------------|----------------------------------------------------------------------------|--------|--------|------|---|----|---|-------|-------|-------|-------|-------|-------|-------|----------|
| cds.Camellia_sinensis.comp3443 | mitochondrial glycoprotein [Populus trichocarpa]                           | 27.672 | 11.641 | 15.2 | 3 | 3  | 3 | 0.898 | 1.071 | 0.951 | 1.118 | 1.024 | 0.969 | 1.065 | 3.88E-01 |
| cds.Camellia_sinensis.comp3443 | putative GPI-anchor transamidase [Vitis vinifera]                          | 47.14  | 4.5401 | 4.1  | 1 | 1  | 1 |       |       |       |       |       |       |       |          |
| cds.Camellia_sinensis.comp3443 | peptidyl-prolyl cis-trans isomerase CYP37, chloroplastic [Jatropha curcas] | 34.068 | 61.016 | 27.7 | 8 | 18 | 8 | 1.013 | 0.954 | 0.96  | 1.041 | 1.044 | 1.033 | 1.065 | 3.01E-02 |
| cds.Camellia_sinensis.comp3443 | peptidyl-prolyl cis-trans isomerase CYP37, chloroplastic [Vigna angularis] | 12.34  | 3.6704 | 18.8 | 3 | 5  | 3 | 0.986 | 0.939 | 1.018 | 1.065 | 1.033 | 1.032 | 1.064 | 7.29E-02 |

|                                                 |                                                                                                           |        |        |      |    |    |    |       |       |       |       |       |       |       |          |
|-------------------------------------------------|-----------------------------------------------------------------------------------------------------------|--------|--------|------|----|----|----|-------|-------|-------|-------|-------|-------|-------|----------|
| cds.Camellia_sinensis.comp34439_c0_seq1_m.36377 | PREDICTED: ATP-dependent zinc metalloprotease FTSH 11, chloroplastic/mitochondrial-like [Vigna angularis] | 29.058 | 12.512 | 16.1 | 5  | 5  | 5  | 0.981 | 0.972 | 1     | 1.036 | 0.938 | 1.011 | 1.011 | 7.64E-01 |
| cds.Camellia_sinensis.comp34443_c0_seq1_m.11218 | PREDICTED: V-type proton ATPase catalytic subunit A [Nelumbo K(+)]                                        | 68.663 | 323.31 | 53.9 | 34 | 78 | 34 | 0.97  | 0.976 | 0.972 | 1.025 | 1.042 | 1.035 | 1.063 | 2.80E-04 |
| cds.Camellia_sinensis.comp34444_c0_seq6_m.37666 | efflux antiporter 2, chloroplastic-like [Cajanus]                                                         | 28.159 | 36.533 | 25   | 5  | 9  | 5  | 1.037 | 1.062 | 1.086 | 0.976 | 0.917 | 0.964 | 0.897 | 9.44E-03 |
| cds.Camellia_sinensis.comp34446_c0_seq1_m.10981 | PREDICTED: proton pump-interactor 1 [Vitis vinifera]                                                      | 72.596 | 30.611 | 14.3 | 8  | 9  | 8  | 1.081 | 1.137 | 1.164 | 0.882 | 0.896 | 0.85  | 0.777 | 7.18E-04 |



|                                                  |                                                                                                                                                                        |        |        |     |   |   |   |       |       |       |       |       |       |       |          |
|--------------------------------------------------|------------------------------------------------------------------------------------------------------------------------------------------------------------------------|--------|--------|-----|---|---|---|-------|-------|-------|-------|-------|-------|-------|----------|
| cds.Camellia_sinensis.comp3444_6_c2_seq1_m.19110 | PREDICTED:<br>monogalactosyl diacylglycerol synthase, chloroplastic<br>[Theobroma cacao]<br>Transducin /WD40 repeat-like superfamily protein<br>[Arabidopsis thaliana] | 35.826 | 2.8526 | 5.2 | 2 | 2 | 2 | 0.927 | 0.969 | 1.023 | 1.054 | 1.036 | 1.017 | 1.064 | 1.06E-01 |
| cds.Camellia_sinensis.comp3444_7_c0_seq1_m.1754  | PREDICTED: 110 kDa U5 small nuclear ribonucleoprotein component<br>CLO<br>[Vitis sodium/calcium exchanger family protein<br>[Populus trichocarpa]]                     | 143.41 | 32.448 | 5.3 | 6 | 8 | 6 | 0.942 | 0.987 | 0.987 | 0.977 | 1.009 | 1.058 | 1.044 | 2.01E-01 |
| cds.Camellia_sinensis.comp3445_1_c0_seq1_m.3457  |                                                                                                                                                                        | 110.5  | 7.4798 | 4.4 | 3 | 3 | 3 |       |       |       |       |       |       |       |          |
| cds.Camellia_sinensis.comp3445_1_c1_seq1_m.17892 |                                                                                                                                                                        | 64.451 | 5.3938 | 6.4 | 3 | 4 | 3 | 1.099 | 1.137 | 1.083 | 0.846 | 0.914 | 0.892 | 0.799 | 1.14E-03 |

|                                                  |                                                                                                        |        |        |      |   |    |   |       |       |       |       |       |       |       |          |
|--------------------------------------------------|--------------------------------------------------------------------------------------------------------|--------|--------|------|---|----|---|-------|-------|-------|-------|-------|-------|-------|----------|
| cds.Camellia_sinensis.comp3445_1_c2_seq2_m.41716 | PREDICT<br>ED: 40S<br>ribosomal<br>protein<br>S13-like<br>[Erythrante guttata]                         | 17.136 | 12.895 | 24.5 | 4 | 8  | 4 | 1.107 | 1.092 | 1.073 | 0.894 | 0.925 | 0.87  | 0.822 | 5.95E-04 |
| cds.Camellia_sinensis.comp3445_2_c0_seq1_m.3869  | PREDICT<br>ED:<br>probable<br>phosphoinositide<br>phosphatase SAC9<br>[Vitis vinifera]                 | 120.62 | 3.2276 | 1.6  | 2 | 2  | 2 | 1.031 | 1.003 | 1.01  | 0.956 | 0.972 | 1.028 | 0.971 | 2.74E-01 |
| cds.Camellia_sinensis.comp3445_5_c0_seq3_m.6116  | PREDICT<br>ED:<br>protein<br>FAR1-RELATED<br>SEQUENCE 3<br>[Vitis]                                     | 44.559 | 3.4653 | 9.3  | 3 | 4  | 1 | 0.897 | 1.023 | 0.906 | 1.04  | 1.154 | 1.014 | 1.135 | 9.33E-02 |
| cds.Camellia_sinensis.comp3445_7_c0_seq1_m.13702 | PREDICT<br>ED:<br>probable<br>acyl-activating<br>enzyme 17,<br>peroxisomal isoform<br>X2<br>[Ziziphus] | 80.7   | 26.051 | 10.5 | 7 | 12 | 7 | 0.962 | 1.018 | 1.009 | 1     | 1.015 | 1.046 | 1.024 | 3.38E-01 |

|                                                                                                                |                    |        |        |      |    |    |    |       |       |       |       |       |       |       |          |
|----------------------------------------------------------------------------------------------------------------|--------------------|--------|--------|------|----|----|----|-------|-------|-------|-------|-------|-------|-------|----------|
| cds.Camellia_sinensis.comp3445                                                                                 | 8_c0_seq1_m.4994   | 78.976 | 3.1051 | 6.2  | 5  | 5  | 2  | 0.911 | 1.005 | 1.019 | 1.099 | 0.963 | 1.031 | 1.054 | 3.72E-01 |
| PREDICTED:<br>pentatricopeptide repeat-containing protein At5g46580, chloroplastic [Nicotiana tomentosiformis] |                    |        |        |      |    |    |    |       |       |       |       |       |       |       |          |
| cds.Camellia_sinensis.comp3445                                                                                 | 8_c0_seq5_m.26948  | 51.333 | 11.137 | 15.9 | 7  | 8  | 4  | 0.951 | 0.997 | 0.93  | 1.079 | 1.08  | 0.993 | 1.095 | 5.88E-02 |
| PREDICTED:<br>pentatricopeptide repeat-containing protein At5g46580, chloroplastic [Sesamum indicum]           |                    |        |        |      |    |    |    |       |       |       |       |       |       |       |          |
| cds.Camellia_sinensis.comp3446                                                                                 | 0_c2_seq1_m.1032_3 | 51.942 | 105.06 | 27.8 | 12 | 18 | 12 | 0.988 | 0.998 | 1.033 | 0.975 | 0.978 | 0.993 | 0.976 | 1.72E-01 |
| PREDICTED:<br>neutral alpha-glucosidase C [Nicotiana glauca]                                                   |                    |        |        |      |    |    |    |       |       |       |       |       |       |       |          |

|                                                     |                                                                                  |        |        |      |    |    |    |       |       |       |       |       |       |       |          |
|-----------------------------------------------------|----------------------------------------------------------------------------------|--------|--------|------|----|----|----|-------|-------|-------|-------|-------|-------|-------|----------|
| cds.Camellia_sinensis.comp3446_0_c2_seq1_9_m.3105_5 | PREDICTED: alpha-glucosidase 2-like [Citrus sinensis]                            | 30.786 | 9.0573 | 13.8 | 4  | 8  | 4  | 0.952 | 1.029 | 1.031 | 0.99  | 1.037 | 1.051 | 1.022 | 5.28E-01 |
| cds.Camellia_sinensis.comp3446_0_c2_seq2_6_m.4275_8 | transmembrane protein, putative [Medicago truncatula]                            | 25.22  | 5.4741 | 7.7  | 2  | 2  | 2  | 0.873 | 0.873 | 0.917 | 1.172 | 1.113 | 1.106 | 1.273 | 6.02E-04 |
| cds.Camellia_sinensis.comp3446_6_c0_seq1_m.25934    | PREDICTED: DNA-directed RNA polymerases II, IV and V subunit 3 [Theobroma cacao] | 35.758 | 79.419 | 20.7 | 5  | 5  | 5  | 0.957 | 0.922 | 1.028 | 1.021 | 1.039 | 1.033 | 1.064 | 1.23E-01 |
| cds.Camellia_sinensis.comp3446_8_c1_seq2_m.18467    | PREDICTED: ornithine aminotransferase, mitochondrial-like [Juglans regia]        | 52.303 | 72.236 | 33.2 | 12 | 26 | 12 | 0.943 | 0.959 | 0.979 | 1.04  | 1.067 | 1.031 | 1.089 | 4.64E-03 |
| cds.Camellia_sinensis.comp3446_8_c1_seq3_m.20334    | PREDICTED: KH domain-containing protein At4g18375-like [Malus domestica]         | 41.231 | 1.5079 | 2.4  | 1  | 1  | 1  | 1.211 | 1.186 | 1.27  | 0.841 | 0.722 | 0.713 | 0.621 | 1.08E-03 |

|                                |                                                                                   |        |        |      |   |   |   |       |       |       |       |       |       |       |          |
|--------------------------------|-----------------------------------------------------------------------------------|--------|--------|------|---|---|---|-------|-------|-------|-------|-------|-------|-------|----------|
| cds.Camellia_sinensis.comp3446 | PREDICT<br>ED: KH<br>domain-containing protein<br>At4g18375-like<br>[Prunus mume] | 26.268 | 12.034 | 12.8 | 3 | 4 | 3 | 1.156 | 1.142 | 1.255 | 0.789 | 0.797 | 0.811 | 0.675 | 2.18E-04 |
| cds.Camellia_sinensis.comp3447 | PREDICT<br>ED: golgin candidate<br>5 [Jatropha curcas]                            | 109.71 | 4.4135 | 2.8  | 3 | 3 | 3 | 0.948 | 1.008 | 1.039 | 1.034 | 0.975 | 1.013 | 1.009 | 7.83E-01 |
| cds.Camellia_sinensis.comp3447 | PREDICT<br>ED: heat shock 70 kDa protein<br>17 [Nelumbo nucifera]                 | 51.457 | 7.1507 | 7.3  | 3 | 4 | 3 | 0.941 | 1.099 | 1.035 | 1.088 | 0.954 | 0.999 | 0.989 | 8.67E-01 |
| cds.Camellia_sinensis.comp3447 | PREDICT<br>ED: heat shock 70 kDa protein<br>17-like [Populus euphratica]          | 33.998 | 4.8345 | 12.8 | 3 | 3 | 3 | 0.94  | 1.058 | 0.943 | 1.004 | 1.068 | 1.006 | 1.047 | 3.48E-01 |
| cds.Camellia_sinensis.comp3448 | PREDICT<br>ED:<br>glucan endo-1,3-beta-glucosidase<br>8 [Vitis                    | 52.902 | 14.094 | 12.4 | 5 | 5 | 5 | 0.909 | 0.95  | 1.017 | 1.051 | 0.938 | 1.034 | 1.051 | 3.61E-01 |

|                                |                                                                                             |        |        |      |    |    |    |       |       |       |       |       |       |       |          |
|--------------------------------|---------------------------------------------------------------------------------------------|--------|--------|------|----|----|----|-------|-------|-------|-------|-------|-------|-------|----------|
| cds.Camellia_sinensis.comp3448 | PREDICT ED: protein TOC75-3, chloroplast ic-like [Sesamum indicum]                          | 89.873 | 123.2  | 27.1 | 19 | 32 | 19 | 0.98  | 0.985 | 0.986 | 0.998 | 1.007 | 1.01  | 1.022 | 6.16E-03 |
| cds.Camellia_sinensis.comp3448 | PREDICT ED: leucine-rich repeat extensin-like protein 4 [Citrus sinensis]                   | 52.66  | 23.249 | 7.8  | 3  | 5  | 3  | 0.918 | 0.989 | 1.017 | 1.006 | 1.002 | 1.017 | 1.035 | 3.76E-01 |
| cds.Camellia_sinensis.comp3448 | PREDICT ED: eukaryotic translation initiation factor 2 subunit gamma-like [Jatropha curcas] | 50.748 | 88.553 | 24.6 | 10 | 14 | 10 | 0.961 | 0.95  | 0.95  | 1.031 | 1.058 | 1.046 | 1.096 | 4.03E-04 |
| cds.Camellia_sinensis.comp3448 | PREDICT ED: MICOS complex subunit mic25a-like isoform X2 [Nelumbo nucifera]                 | 21.575 | 2.2728 | 20.5 | 4  | 4  | 4  | 1.141 | 1.133 | 1.106 | 0.827 | 0.832 | 0.92  | 0.763 | 1.62E-03 |

|                                |                      |                                                                                                                                                              |        |        |      |    |    |    |       |       |       |       |       |       |       |          |
|--------------------------------|----------------------|--------------------------------------------------------------------------------------------------------------------------------------------------------------|--------|--------|------|----|----|----|-------|-------|-------|-------|-------|-------|-------|----------|
| cds.Camellia_sinensis.comp3448 | 8_c1_seq1_m.29564    | PREDICT<br>ED: AB<br>hydrolase<br>superfamily<br>protein<br>YfhM-like<br>[Prunus<br>mume]                                                                    | 43.349 | 10.761 | 12.9 | 6  | 8  | 4  | 0.988 | 1.005 | 0.97  | 1.065 | 0.987 | 0.989 | 1.026 | 4.00E-01 |
| cds.Camellia_sinensis.comp3448 | 8_c1_seq2_m.29851    | PREDICT<br>ED:<br>bifunctional<br>epoxide<br>hydrolase<br>2 [Citrus<br>sinensis]                                                                             | 35.255 | 4.0585 | 17.7 | 6  | 10 | 4  | 0.991 | 0.955 | 1.033 | 1.019 | 1.037 | 0.983 | 1.02  | 5.05E-01 |
| cds.Camellia_sinensis.comp3449 | 0_c0_seq1_m.3865     | PREDICT<br>ED:<br>isoleucine-<br>-tRNA<br>ligase,<br>chloroplast<br>ic/mitochon-<br>drial<br>isoform<br>X2 [Vitis<br>vinifera]<br>At2g4701<br>0/F14M4.1<br>6 | 110.79 | 38.967 | 13.2 | 13 | 14 | 13 | 0.993 | 1.025 | 1.039 | 0.982 | 0.986 | 0.967 | 0.96  | 5.05E-02 |
| cds.Camellia_sinensis.comp3449 | 0_c1_seq2_m.18307    | [Arabidopsis<br>lyrata<br>subsp.]                                                                                                                            | 56.641 | 68.133 | 19.4 | 9  | 19 | 9  | 0.958 | 0.978 | 0.955 | 1.042 | 1.035 | 1.053 | 1.083 | 9.03E-04 |
| cds.Camellia_sinensis.comp3449 | 3_c0_seq2_1_m.3844_9 | PREDICT<br>ED:<br>probable<br>cytosolic<br>oligopepti-<br>dase A<br>[Sesamum<br>indicum]                                                                     | 28.832 | 1.2475 | 6.6  | 2  | 4  | 2  | 0.904 | 1.018 | 1.097 | 0.981 | 0.996 | 1.022 | 0.993 | 9.53E-01 |

|                                                  |                                                                                                            |        |        |      |    |    |    |       |       |       |       |       |       |       |          |
|--------------------------------------------------|------------------------------------------------------------------------------------------------------------|--------|--------|------|----|----|----|-------|-------|-------|-------|-------|-------|-------|----------|
| cds.Camellia_sinensis.comp3449_3_c0_seq8_m.11683 | PREDICT<br>ED:<br>probable cytosolic oligopeptidase A<br>[Theobroma cacao]                                 | 18.812 | 2.1577 | 9.2  | 1  | 1  | 1  | 0.802 | 0.915 | 1.052 | 1.089 | 1.149 | 1.047 | 1.186 | 1.00E-01 |
| cds.Camellia_sinensis.comp3449_9_c1_seq2_m.5013  | PREDICT<br>ED:<br>pantothenate kinase 2<br>[Prunus mume]                                                   | 101.98 | 32.834 | 10.3 | 9  | 12 | 9  | 0.943 | 0.944 | 0.944 | 0.977 | 1.032 | 1.022 | 1.071 | 5.64E-02 |
| cds.Camellia_sinensis.comp3450_0_c0_seq1_m.1120  | PREDICT<br>ED: prolyl endopeptidase-like<br>[Sesamum indicum]                                              | 80.844 | 52.152 | 20.2 | 12 | 15 | 12 | 0.978 | 0.956 | 0.97  | 1.04  | 1.06  | 1.041 | 1.082 | 9.95E-04 |
| cds.Camellia_sinensis.comp3450_2_c0_seq2_m.29373 | PREDICT<br>ED:<br>alcohol dehydrogenase-like 7<br>[Eucalyptus grandis]                                     | 39.085 | 6.3619 | 9.2  | 3  | 4  | 3  | 0.983 | 0.959 | 0.859 | 1.038 | 1.115 | 1.07  | 1.151 | 3.78E-02 |
| cds.Camellia_sinensis.comp3450_2_c1_seq5_m.34199 | PREDICT<br>ED:<br>peptidyl-prolyl cis-trans isomerase FKBP16-3,<br>chloroplastic-like<br>[Camelina sativa] | 13.437 | 11.072 | 22.2 | 4  | 12 | 4  | 0.975 | 0.975 | 0.988 | 1.04  | 1.026 | 1.02  | 1.05  | 2.48E-03 |





|                                                  |                                                                                               |        |        |      |   |   |   |       |       |       |       |       |       |       |          |
|--------------------------------------------------|-----------------------------------------------------------------------------------------------|--------|--------|------|---|---|---|-------|-------|-------|-------|-------|-------|-------|----------|
| cds.Camellia_sinensis.comp3451_3_c1_seq1_m.16451 | PREDICT<br>ED: beta-(1,2)-xylosyltransferase<br>[Nicotiana attenuata]                         | 57.07  | 23.518 | 8.1  | 3 | 3 | 3 | 0.919 | 0.999 | 1.046 | 1.007 | 1.014 | 0.975 | 1.011 | 7.78E-01 |
| cds.Camellia_sinensis.comp3451_4_c0_seq9_m.24763 | PREDICT<br>ED: dihydroorotase, mitochondrial isoform X2 [Vitis]                               | 26.318 | 2.1729 | 7.6  | 2 | 2 | 2 | 1.11  | 0.966 | 0.916 | 1.079 | 0.883 | 1.045 | 1.005 | 9.60E-01 |
| cds.Camellia_sinensis.comp3451_6_c0_seq2_m.44947 | PREDICT<br>ED: glutamate synthase 1 [NADH], chloroplastic isoform X2<br>[Nicotiana attenuata] | 27.441 | 10.571 | 8.4  | 2 | 5 | 2 | 0.973 | 0.941 | 0.963 | 1.086 | 1.112 | 1.034 | 1.123 | 7.94E-03 |
| cds.Camellia_sinensis.comp3451_6_c1_seq1_m.14271 | PREDICT<br>ED: glutamate synthase 1 [NADH], chloroplastic isoform X1 [Vitis vinifera]         | 66.623 | 21.001 | 11.4 | 6 | 7 | 4 | 1.034 | 1.033 | 1.016 | 0.992 | 0.99  | 0.91  | 0.938 | 8.94E-02 |

|                                                  |                                                                                          |        |        |      |    |    |    |       |       |       |       |       |       |       |          |
|--------------------------------------------------|------------------------------------------------------------------------------------------|--------|--------|------|----|----|----|-------|-------|-------|-------|-------|-------|-------|----------|
| cds.Camellia_sinensis.comp3451_6_c1_seq2_m.46745 | PREDICTED:<br>glutamate synthase [NADH], amyloplast ic-like, partial [Nicotiana tabacum] | 25.891 | 24.9   | 26.8 | 5  | 6  | 3  | 0.993 | 0.929 | 1.024 | 0.98  | 1.016 | 1.071 | 1.041 | 3.54E-01 |
| cds.Camellia_sinensis.comp3451_8_c1_seq1_m.25912 | PREDICTED: novel plant SNARE 13 [Theobroma cacao]                                        | 29.468 | 4.8579 | 14.2 | 4  | 4  | 4  | 0.921 | 1.01  | 0.993 | 0.912 | 1.011 | 0.97  | 0.989 | 8.07E-01 |
| cds.Camellia_sinensis.comp3452_5_c2_seq1_m.3453  | PREDICTED: EXPORTIN 1A [Vitis vinifera]                                                  | 92.645 | 17.826 | 13.7 | 10 | 14 | 10 | 0.983 | 0.918 | 0.938 | 1.038 | 1.065 | 1.075 | 1.119 | 7.64E-03 |
| cds.Camellia_sinensis.comp3452_5_c2_seq1_m.3454  | PREDICTED: exportin-1-like isoform X3 [Nicotiana glauca]                                 | 29.726 | 36.271 | 21.2 | 6  | 9  | 6  | 0.968 | 0.937 | 0.974 | 1.074 | 1.066 | 1.061 | 1.112 | 1.06E-03 |
| cds.Camellia_sinensis.comp3452_6_c0_seq2_m.10529 | PREDICTED: luminal-binding protein 5 [Theobroma cacao]                                   | 73.573 | 240.54 | 44   | 30 | 69 | 23 | 1.135 | 1.17  | 1.147 | 0.844 | 0.839 | 0.841 | 0.731 | 2.10E-06 |







|                                                                              |                      |        |        |      |    |    |   |       |       |       |       |       |       |       |          |
|------------------------------------------------------------------------------|----------------------|--------|--------|------|----|----|---|-------|-------|-------|-------|-------|-------|-------|----------|
| cds.Camellia_sinensis.comp3454                                               | 8_c0_seq1_m.8240     | 79.412 | 37.641 | 18.4 | 11 | 18 | 8 | 0.971 | 1.012 | 1.007 | 0.998 | 1.006 | 1.002 | 1.005 | 6.99E-01 |
| PREDICT ED: programmed cell death protein 4 [Vitis vinifera]                 |                      |        |        |      |    |    |   |       |       |       |       |       |       |       |          |
| cds.Camellia_sinensis.comp3454                                               | 8_c0_seq2_m.34446    | 28.431 | 9.0893 | 16.9 | 4  | 5  | 1 | 0.979 | 1.042 | 0.975 | 1.035 | 0.929 | 1.052 | 1.007 | 9.06E-01 |
| PREDICT ED: programmed cell death protein 4 [Vitis vinifera]                 |                      |        |        |      |    |    |   |       |       |       |       |       |       |       |          |
| cds.Camellia_sinensis.comp3454                                               | 9_c1_seq1_m.3197     | 46.684 | 8.7579 | 8.2  | 3  | 3  | 3 | 0.932 | 1.044 | 0.976 | 1.049 | 0.909 | 1.105 | 1.038 | 6.33E-01 |
| PREDICT ED: CLP1 homolog [Sesamum indicum]                                   |                      |        |        |      |    |    |   |       |       |       |       |       |       |       |          |
| cds.Camellia_sinensis.comp3455                                               | 3_c0_seq1_0_m.3541_4 | 31.986 | 7.0224 | 7.4  | 2  | 2  | 2 | 1.017 | 0.977 | 0.979 | 1.08  | 0.973 | 0.988 | 1.023 | 5.69E-01 |
| PREDICT ED: glutathione hydroquinone reductase YqjG-like [Nicotiana tabacum] |                      |        |        |      |    |    |   |       |       |       |       |       |       |       |          |
| cds.Camellia_sinensis.comp3455                                               | 3_c0_seq1_1_m.3719_6 | 25.829 | 1.9708 | 4.3  | 1  | 1  | 1 |       |       |       |       |       |       |       |          |
| PREDICT ED: protein VAC14 homolog [Sesamum indicum]                          |                      |        |        |      |    |    |   |       |       |       |       |       |       |       |          |







|                                                     |                                                                                                                                       |        |        |      |    |    |    |       |       |       |       |       |       |       |          |
|-----------------------------------------------------|---------------------------------------------------------------------------------------------------------------------------------------|--------|--------|------|----|----|----|-------|-------|-------|-------|-------|-------|-------|----------|
| cds.Camellia_sinensis.comp3457_5_c0_seq1_m.23342    | PREDICTED:<br>bifunctional aspartate aminotransferase and glutamate/aspartate-prephenate aminotransferase isoform X2 [Vitis vinifera] | 52.631 | 69.467 | 23.8 | 9  | 11 | 9  | 1.061 | 1.113 | 1.066 | 0.881 | 0.876 | 0.956 | 0.837 | 5.14E-03 |
| cds.Camellia_sinensis.comp3457_5_c1_seq3_5_m.2764_5 | PREDICTED:<br>ranBP2-type zinc finger protein At1g6732_5 isoform X1 [Vitis vinifera]                                                  | 30.904 | 3.5299 | 6.4  | 1  | 2  | 1  |       |       |       |       |       |       |       |          |
| cds.Camellia_sinensis.comp3457_6_c0_seq2_m.20834    | PREDICTED:<br>ATP-dependent 6-phosphofructokinase 2 [Theobroma cacao]                                                                 | 56.344 | 4.6632 | 8.2  | 4  | 5  | 3  | 1.021 | 1.055 | 0.99  | 0.971 | 0.993 | 0.971 | 0.957 | 9.38E-02 |
| cds.Camellia_sinensis.comp3458_0_c0_seq5_m.8252     | PREDICTED:<br>protein fluG [Vitis vinifera]                                                                                           | 94.155 | 101.14 | 18.5 | 12 | 16 | 12 | 0.928 | 0.955 | 0.98  | 1.026 | 1.041 | 1.056 | 1.091 | 8.10E-03 |

|                                                 |                                                                                                |        |        |      |    |    |    |       |       |       |       |       |       |       |          |
|-------------------------------------------------|------------------------------------------------------------------------------------------------|--------|--------|------|----|----|----|-------|-------|-------|-------|-------|-------|-------|----------|
| cds.Camellia_sinensis.comp34583_c0_seq1_m.9794  | PREDICTED:<br>glutamine-fructose-6-phosphate aminotransferase [isomerizing] 2 [Vitis vinifera] | 74.672 | 17.668 | 7.9  | 5  | 5  | 5  | 0.936 | 0.931 | 0.864 | 1.076 | 1.086 | 1.113 | 1.199 | 2.78E-03 |
| cds.Camellia_sinensis.comp34585_c0_seq8_m.15571 | PREDICTED: CBL-interacting protein kinase 04 isoform X1 [Vitis vinifera]                       | 41.985 | 2.53   | 3.2  | 1  | 2  | 1  |       |       |       |       |       |       |       |          |
| cds.Camellia_sinensis.comp34586_c0_seq4_m.32396 | PREDICTED: endochitinase PR4-like [Nelumbo nucifera]                                           | 24.711 | 10.503 | 11.5 | 2  | 2  | 2  | 0.855 | 0.774 | 0.763 | 1.226 | 1.205 | 1.246 | 1.537 | 3.16E-04 |
| cds.Camellia_sinensis.comp34588_c0_seq1_m.16583 | PREDICTED: adenylosuccinate synthetase 2, chloroplastic-like [Nelumbo nucifera]                | 54.314 | 118.54 | 27.5 | 13 | 26 | 13 | 0.984 | 1.004 | 1.003 | 1.021 | 1.013 | 1.008 | 1.017 | 8.79E-02 |

|                                                 |                                                                                 |        |        |      |    |    |    |       |       |       |       |       |       |       |          |
|-------------------------------------------------|---------------------------------------------------------------------------------|--------|--------|------|----|----|----|-------|-------|-------|-------|-------|-------|-------|----------|
| cds.Camellia_sinensis.comp34590_c1_seq4_m.24841 | PREDICTED: L-2-hydroxyglutarate dehydrogenase, mitochondrial isoform X1 [Vitis] | 46.031 | 2.037  | 4.7  | 2  | 2  | 2  |       |       |       |       |       |       |       |          |
| cds.Camellia_sinensis.comp34593_c0_seq1_m.30739 | PREDICTED: arginine--tRNA ligase, cytoplasmic-like isoform X2 [Sesamum indicum] | 38.734 | 49.981 | 47.5 | 15 | 21 | 15 | 0.976 | 0.963 | 0.964 | 1.034 | 1.056 | 1     | 1.064 | 1.94E-02 |
| cds.Camellia_sinensis.comp34593_c1_seq8_m.38584 | PREDICTED: arginine--tRNA ligase, cytoplasmic-like isoform X2 [Sesamum indicum] | 28.805 | 73.985 | 40.5 | 9  | 12 | 9  | 0.974 | 0.99  | 1.004 | 1.039 | 1.035 | 0.991 | 1.033 | 1.42E-01 |
| cds.Camellia_sinensis.comp34595_c0_seq1_m.9001  | UDP-glycosyltransferase 73C2 [Morus notabilis]                                  | 56.321 | 83.053 | 20.5 | 11 | 26 | 11 | 0.993 | 0.998 | 1.001 | 0.998 | 1.036 | 0.992 | 1.011 | 4.65E-01 |



|                                                     |                                                                                   |        |        |      |   |   |   |       |       |       |       |       |       |       |          |
|-----------------------------------------------------|-----------------------------------------------------------------------------------|--------|--------|------|---|---|---|-------|-------|-------|-------|-------|-------|-------|----------|
| cds.Camellia_sinensis.comp3461_4_c0_seq1_8_m.4331_3 | putative ADP-ribosylation factor GTPase-activating protein AGD5 [Morus notabilis] | 29.563 | 1.8704 | 5.2  | 2 | 2 | 2 | 1.079 | 1.029 | 0.957 | 0.95  | 0.953 | 1.024 | 0.955 | 3.46E-01 |
| cds.Camellia_sinensis.comp3461_4_c0_seq2_0_m.4475_6 | probable ADP-ribosylation factor GTPase-activating protein AGD5 [Capsicum annuum] | 21.264 | 1.9202 | 4.5  | 1 | 1 | 1 |       |       |       |       |       |       |       |          |
| cds.Camellia_sinensis.comp3461_9_c0_seq3_m.17747    | phosphomevalonate kinase isoform X1 [Vitis vinifera]                              | 54.117 | 1.4173 | 2.8  | 1 | 1 | 1 |       |       |       |       |       |       |       |          |
| cds.Camellia_sinensis.comp3462_7_c0_seq4_m.31090    | clavaminatase synthase-like protein At3g21360 [Vitis vinifera]                    | 36.8   | 12.654 | 16.1 | 5 | 5 | 5 | 0.951 | 0.93  | 0.989 | 1.059 | 1.03  | 1.066 | 1.099 | 1.04E-02 |



|                                                     |                                                                                         |        |        |      |    |    |    |       |       |       |       |       |       |       |          |
|-----------------------------------------------------|-----------------------------------------------------------------------------------------|--------|--------|------|----|----|----|-------|-------|-------|-------|-------|-------|-------|----------|
| cds.Camellia_sinensis.comp3464_3_c0_seq3_m.10744    | PREDICT<br>ED: beta-galactosidase 9<br>isoform X1 [Citrus sinensis]                     | 81.319 | 23.389 | 12.3 | 9  | 17 | 9  | 0.994 | 0.98  | 0.99  | 1.007 | 1     | 0.981 | 1.008 | 4.18E-01 |
| cds.Camellia_sinensis.comp3464_3_c0_seq7_m.44936    | PREDICT<br>ED: beta-galactosidase 9<br>[Ziziphus jujuba]                                | 18.296 | 12.838 | 25.2 | 4  | 8  | 4  | 0.938 | 0.988 | 1.023 | 1.048 | 1.041 | 1.01  | 1.051 | 1.44E-01 |
| cds.Camellia_sinensis.comp3464_5_c2_seq1_0_m.1252_2 | PREDICT<br>ED: TBC1 domain family member<br>17 isoform X3 [Vitis vinifera]              | 80.592 | 18.723 | 12.3 | 7  | 8  | 7  | 0.951 | 0.963 | 0.999 | 1.057 | 0.994 | 1.008 | 1.05  | 1.09E-01 |
| cds.Camellia_sinensis.comp3464_5_c2_seq6_m.4156     | PREDICT<br>ED:<br>probable sucrose-phosphate synthase isoform X3<br>[Nicotiana tabacum] | 118.13 | 15.906 | 9.5  | 11 | 13 | 7  | 1.089 | 1.163 | 1.099 | 0.87  | 0.874 | 0.877 | 0.782 | 7.04E-03 |
| cds.Camellia_sinensis.comp3464_5_c2_seq7_m.4543     | PREDICT<br>ED:<br>probable sucrose-phosphate synthase 3<br>[Prunus mume]                | 119.66 | 40.225 | 12.3 | 15 | 18 | 11 | 1.092 | 1.022 | 1.092 | 0.883 | 0.926 | 0.937 | 0.857 | 5.64E-03 |



|                                                 |                                                                                                                |        |        |      |   |    |   |       |       |       |       |      |       |       |          |
|-------------------------------------------------|----------------------------------------------------------------------------------------------------------------|--------|--------|------|---|----|---|-------|-------|-------|-------|------|-------|-------|----------|
| cds.Camellia_sinensis.comp34650_c0_seq1_m.31180 | PREDICTED:<br>probable S-adenosylmethionine-dependent methyltransferase<br>At5g37990 [Vitis vinifera]          | 40.715 | 11.405 | 15.5 | 6 | 8  | 6 | 0.977 | 0.942 | 1.042 | 0.987 | 1.03 | 1.021 | 1.026 | 4.59E-01 |
| cds.Camellia_sinensis.comp34652_c0_seq1_m.14108 | PREDICTED:<br>patatin-like phospholipase domain-containing protein 2 isoform X1<br>[Nicotiana tomentosiformis] | 47.37  | 1.883  | 2.1  | 1 | 1  | 1 |       |       |       |       |      |       |       |          |
| cds.Camellia_sinensis.comp34662_c1_seq5_m.34836 | PREDICTED:<br>nucleoid-associated protein<br>At2g24020,<br>chloroplastic-like<br>[Nelumbo nucifera]            | 21.74  | 75.859 | 55.2 | 9 | 23 | 9 | 0.972 | 0.991 | 0.983 | 1.041 | 1.01 | 1.031 | 1.046 | 1.29E-02 |

|                                                     |                                                                                                                                                                                 |        |        |      |   |    |   |       |       |       |       |       |       |       |          |
|-----------------------------------------------------|---------------------------------------------------------------------------------------------------------------------------------------------------------------------------------|--------|--------|------|---|----|---|-------|-------|-------|-------|-------|-------|-------|----------|
| cds.Camellia_sinensis.comp3466_3_c0_seq1_0_m.3472_9 | PREDICT<br>ED: 50S<br>ribosomal<br>protein<br>L15,<br>chloroplast<br>ic [Vitis<br>vinifera]<br>ATP-NAD<br>kinase<br>family<br>protein<br>[Populus<br>trichocarpa<br>]           | 29.408 | 47.897 | 29.7 | 7 | 10 | 7 | 1.179 | 1.227 | 1.204 | 0.766 | 0.789 | 0.787 | 0.649 | 4.20E-06 |
| cds.Camellia_sinensis.comp3466_3_c0_seq4_m.5288     | kinase<br>family<br>protein<br>[Populus<br>trichocarpa<br>]<br>PREDICT<br>ED:<br>peroxisom<br>al (S)-2-<br>hydroxy-<br>acid<br>oxidase<br>GLO4<br>[Solanum<br>lycopersic<br>um] | 104.87 | 7.2113 | 4.9  | 4 | 5  | 4 | 0.957 | 0.889 | 0.861 | 1.09  | 1.075 | 1.159 | 1.228 | 6.14E-03 |
| cds.Camellia_sinensis.comp3466_4_c1_seq3_m.34598    | peroxisom<br>al (S)-2-<br>hydroxy-<br>acid<br>oxidase<br>GLO4<br>[Solanum<br>lycopersic<br>um]<br>PREDICT<br>ED: ABC                                                            | 37.428 | 27.271 | 19.2 | 6 | 9  | 6 | 0.956 | 1.015 | 1.013 | 1.004 | 1.002 | 1.045 | 1.022 | 4.02E-01 |
| cds.Camellia_sinensis.comp3466_5_c2_seq9_m.7129     | transporter<br>C family<br>member 2<br>[Theobroma<br>cacao]                                                                                                                     | 102.12 | 78.415 | 10.2 | 9 | 15 | 9 | 1.01  | 0.996 | 1.041 | 0.964 | 0.962 | 0.995 | 0.959 | 6.82E-02 |

|                                |                                                                                                        |        |        |      |    |    |    |       |       |       |       |       |       |       |          |
|--------------------------------|--------------------------------------------------------------------------------------------------------|--------|--------|------|----|----|----|-------|-------|-------|-------|-------|-------|-------|----------|
| cds.Camellia_sinensis.comp3467 | phosphoribosylamine--glycine ligase [Daucus carota subsp. sativus]                                     | 55.786 | 100.69 | 34.3 | 13 | 13 | 13 | 1.012 | 0.947 | 1.055 | 1.035 | 0.961 | 1.039 | 1.007 | 8.66E-01 |
| cds.Camellia_sinensis.comp3467 | protein CutA, chloroplastic [Citrus sinensis] group 1 family glycosyltransferase [Medicago truncatula] | 20.119 | 31.688 | 24.1 | 5  | 9  | 5  | 0.989 | 0.88  | 0.912 | 1.09  | 1.118 | 1.046 | 1.17  | 1.63E-02 |
| cds.Camellia_sinensis.comp3468 | stromal 70 kDa heat shock-related protein, chloroplastic-like [Lupinus angustifolius]                  | 56.927 | 23.804 | 9.8  | 5  | 9  | 5  | 0.985 | 1.028 | 1.023 | 0.992 | 0.991 | 0.957 | 0.968 | 1.48E-01 |
| cds.Camellia_sinensis.comp3469 |                                                                                                        | 37.758 | 124.04 | 44.3 | 16 | 45 | 9  | 0.94  | 0.925 | 0.905 | 1.084 | 1.093 | 1.082 | 1.177 | 1.41E-04 |

|                                                  |                                                                                 |        |        |      |   |    |   |       |       |       |       |       |       |       |          |
|--------------------------------------------------|---------------------------------------------------------------------------------|--------|--------|------|---|----|---|-------|-------|-------|-------|-------|-------|-------|----------|
| cds.Camellia_sinensis.comp3469_5_c0_seq5_m.19447 | PREDICTED: DEAD-box ATP-dependent RNA helicase 35 [Gossypium raimondii]         | 60.629 | 1.3572 | 1.3  | 1 | 1  | 1 | 1.025 | 1.054 | 0.976 | 1.003 | 0.962 | 0.981 | 0.964 | 2.31E-01 |
| cds.Camellia_sinensis.comp3469_7_c1_seq1_m.2737  | PREDICTED: 5'-3' exoribonuclease 3 [Vitis vinifera]                             | 126.6  | 2.0083 | 1.4  | 2 | 2  | 2 | 1.027 | 1.058 | 1.03  | 0.949 | 0.977 | 0.955 | 0.925 | 3.80E-03 |
| cds.Camellia_sinensis.comp3469_8_c0_seq1_m.3023  | PREDICTED: DNA-directed RNA polymerases IV and V subunit 2 [Solanum lycopersic] | 137.92 | 3.0848 | 1.6  | 2 | 2  | 2 | 1.063 | 1.027 | 1.069 | 0.946 | 0.919 | 0.966 | 0.896 | 4.58E-03 |
| cds.Camellia_sinensis.comp3470_0_c0_seq1_m.18868 | UDP-glycosyltransferase 71C3 [Morus notabilis]                                  | 56.597 | 37.281 | 12.1 | 6 | 15 | 6 | 1.086 | 1.021 | 1.053 | 0.909 | 0.923 | 0.983 | 0.891 | 1.78E-02 |

|                                                  |                                                                                                        |        |        |      |   |    |   |       |       |       |       |       |       |       |          |
|--------------------------------------------------|--------------------------------------------------------------------------------------------------------|--------|--------|------|---|----|---|-------|-------|-------|-------|-------|-------|-------|----------|
| cds.Camellia_sinensis.comp3470.6_c0_seq9_m.31711 | PREDICT<br>ED:<br>glutamyl-tRNA reductase-binding protein, chloroplastic isoform X1 [Nelumbo nucifera] | 37.928 | 15.911 | 15.3 | 5 | 6  | 5 | 1.034 | 1.126 | 1.07  | 0.932 | 0.936 | 0.858 | 0.844 | 1.07E-02 |
| cds.Camellia_sinensis.comp3471.2_c0_seq4_m.22172 | PREDICT<br>ED:<br>importin subunit beta-1 [Vitis vinifera]                                             | 57.069 | 8.9628 | 16.7 | 6 | 9  | 3 | 1.038 | 1.042 | 0.984 | 0.94  | 0.929 | 0.952 | 0.921 | 1.41E-02 |
| cds.Camellia_sinensis.comp3471.7_c0_seq1_m.15886 | PREDICT<br>ED:<br>probable splicing factor 3A subunit 1 [Beta vulgaris subsp. vulgaris]                | 44.567 | 23.655 | 6.4  | 2 | 2  | 2 |       |       |       |       |       |       |       |          |
| cds.Camellia_sinensis.comp3471.7_c0_seq1_m.15888 | PREDICT<br>ED:<br>probable splicing factor 3A subunit 1 [Vitis vinifera]                               | 23.346 | 46.449 | 47.6 | 8 | 11 | 8 | 1.018 | 0.975 | 1.021 | 1.01  | 0.972 | 1.031 | 1     | 9.87E-01 |

|                                                  |                                                                                 |        |        |      |   |   |   |       |       |       |       |       |       |       |          |
|--------------------------------------------------|---------------------------------------------------------------------------------|--------|--------|------|---|---|---|-------|-------|-------|-------|-------|-------|-------|----------|
| cds.Camellia_sinensis.comp3471_7_c1_seq3_m.37342 | PREDICTED:<br>probable splicing factor 3A subunit 1<br>[Vitis vinifera]         | 25.445 | 14.626 | 10.5 | 2 | 2 | 2 | 0.962 | 0.923 | 0.99  | 1.059 | 0.996 | 1.094 | 1.095 | 5.69E-02 |
| cds.Camellia_sinensis.comp3472_2_c0_seq1_m.7470  | PREDICTED:<br>alpha-L-fucosidase 2-like isoform X1<br>[Populus euphratica]      | 45.366 | 9.3131 | 6.2  | 2 | 2 | 2 | 0.986 | 0.979 | 0.935 | 0.921 | 1.072 | 1.116 | 1.072 | 3.35E-01 |
| cds.Camellia_sinensis.comp3472_2_c0_seq2_m.21225 | PREDICTED:<br>alpha-L-fucosidase 2-like isoform X2<br>[Juglans regia]           | 46.676 | 14.981 | 6.4  | 2 | 3 | 2 | 0.983 | 1.002 | 0.917 | 1.039 | 1.07  | 1.008 | 1.074 | 8.78E-02 |
| cds.Camellia_sinensis.comp3472_8_c0_seq1_m.3101  | PREDICTED:<br>serine/threonine-protein phosphatase BSL3<br>[Gossypium arboreum] | 106.39 | 26.306 | 8.7  | 8 | 9 | 8 | 0.97  | 0.99  | 0.989 | 0.999 | 0.987 | 1.032 | 1.023 | 1.97E-01 |

|                                                   |                                                                                  |        |        |      |    |    |    |       |       |       |       |       |       |       |          |
|---------------------------------------------------|----------------------------------------------------------------------------------|--------|--------|------|----|----|----|-------|-------|-------|-------|-------|-------|-------|----------|
| cds.Camellia_sinensis.comp3473_5_c0_seq10_m.10269 | PREDICTED: DNA gyrase subunit B, chloroplastic/mitochondrial [Vitis vinifera]    | 84.962 | 2.7479 | 7.1  | 4  | 5  | 2  | 0.968 | 1.069 | 1.054 | 0.957 | 0.954 | 0.996 | 0.94  | 1.49E-01 |
| cds.Camellia_sinensis.comp3473_5_c0_seq6_m.9683   | PREDICTED: DNA gyrase subunit B, chloroplastic/mitochondrial [Nicotiana tabacum] | 69.374 | 15.312 | 9.7  | 5  | 5  | 3  |       |       |       |       |       |       |       |          |
| cds.Camellia_sinensis.comp3473_9_c0_seq2_m.24439  | PREDICTED: ribosome-binding ATPase YchF [Ricinus communis]                       | 46.296 | 48.637 | 31.3 | 11 | 17 | 11 | 1.033 | 1.07  | 1.037 | 0.953 | 0.969 | 0.945 | 0.913 | 2.44E-03 |
| cds.Camellia_sinensis.comp3473_9_c0_seq4_m.27322  | PREDICTED: transcription factor Pur-alpha 1 [Vitis vinifera]                     | 32.266 | 48.111 | 40.4 | 12 | 17 | 12 | 0.983 | 0.976 | 0.979 | 1.045 | 0.99  | 1.009 | 1.036 | 1.58E-01 |
| cds.Camellia_sinensis.comp3474_3_c1_seq4_m.16761  | PREDICTED: chaperone protein dnaJ 13 [Vitis vinifera]                            | 60.258 | 11.678 | 5.4  | 3  | 3  | 3  | 1.005 | 1.015 | 1.022 | 1.042 | 0.922 | 1.002 | 0.975 | 5.41E-01 |







|                                                   |                                                                                         |        |        |      |    |    |    |       |       |       |       |       |       |       |          |
|---------------------------------------------------|-----------------------------------------------------------------------------------------|--------|--------|------|----|----|----|-------|-------|-------|-------|-------|-------|-------|----------|
| cds.Camellia_sinensis.comp3475.3_c0_seq2_m.17644  | PREDICTED:<br>nuclear pore complex protein NUP98A [Vitis vinifera]                      | 69.604 | 7.6347 | 8.6  | 6  | 6  | 5  | 0.941 | 1.025 | 1.005 | 1.06  | 0.991 | 0.998 | 1.026 | 4.80E-01 |
| cds.Camellia_sinensis.comp3475.6_c1_seq2_m.1669   | PREDICTED: sister chromatid cohesion protein PDS5 homolog A isoform X2 [Vitis vinifera] | 95.499 | 1.421  | 1.2  | 1  | 1  | 1  | 0.977 | 0.948 | 0.938 | 1.141 | 1.014 | 1.009 | 1.105 | 7.89E-02 |
| cds.Camellia_sinensis.comp3476.3_c0_seq1_m.14738  | glutamate-cysteine ligase, chloroplast ic [Nicotiana tabacum]                           | 59.457 | 98.571 | 26.4 | 13 | 26 | 13 | 0.996 | 1.004 | 0.973 | 0.986 | 1.005 | 0.995 | 1.004 | 7.06E-01 |
| cds.Camellia_sinensis.comp3476.5_c0_seq3_m.1415_3 | PREDICTED:<br>thioredoxin reductase NTRC [Ipomoea]                                      | 36.436 | 52.225 | 30   | 8  | 16 | 8  | 0.98  | 0.978 | 1.026 | 1.019 | 0.983 | 1.014 | 1.011 | 6.06E-01 |







|                                                                                                                                 |                  |        |        |      |    |    |    |       |       |       |       |       |       |       |          |
|---------------------------------------------------------------------------------------------------------------------------------|------------------|--------|--------|------|----|----|----|-------|-------|-------|-------|-------|-------|-------|----------|
| cds.Camellia_sinensis.comp3478                                                                                                  | 9_c1_seq1_m.8540 | 59.937 | 7.2469 | 3.7  | 2  | 2  | 2  | 0.98  | 0.886 | 1.009 | 1.122 | 1.032 | 0.999 | 1.097 | 1.52E-01 |
| PREDICTED:<br>uncharacterized aarF domain-containing protein kinase<br>At1g79600, chloroplastic<br>[Sesamum indicum]            |                  |        |        |      |    |    |    |       |       |       |       |       |       |       |          |
| cds.Camellia_sinensis.comp3478                                                                                                  | 9_c1_seq2_m.9243 | 21.324 | 2.93   | 6.6  | 1  | 1  | 1  | 0.658 | 1.549 | 0.858 | 0.961 | 1.044 | 0.96  | 0.967 | 9.11E-01 |
| PREDICTED:<br>uncharacterized aarF domain-containing protein kinase<br>At1g79600, chloroplastic isoform X1[Gossypium raimondii] |                  |        |        |      |    |    |    |       |       |       |       |       |       |       |          |
| cds.Camellia_sinensis.comp3479                                                                                                  | 3_c0_seq4_m.2146 | 109.19 | 130.06 | 34.9 | 30 | 49 | 30 | 1.029 | 1.023 | 1.039 | 0.989 | 0.977 | 0.985 | 0.955 | 1.30E-03 |
| PREDICTED:<br>tripeptidyl-peptidase 2 isoform X1 [Vitis vinifera]                                                               |                  |        |        |      |    |    |    |       |       |       |       |       |       |       |          |







|                                                  |                                                                                                                                                                                  |        |        |      |    |    |    |       |       |       |       |       |       |       |          |
|--------------------------------------------------|----------------------------------------------------------------------------------------------------------------------------------------------------------------------------------|--------|--------|------|----|----|----|-------|-------|-------|-------|-------|-------|-------|----------|
| cds.Camellia_sinensis.comp34815_c1_seq62_m.37747 | PREDICTED:<br>bifunctional aspartokinase/homoserine dehydrogenase isoform X5<br>[Solanum tuberosum<br>PREDICTED: SEC1 family transport protein SLY1-like<br>[Populus euphratica] | 33.059 | 5.768  | 6.5  | 2  | 2  | 2  | 0.891 | 0.969 | 1.01  | 1.081 | 1.024 | 1.058 | 1.102 | 7.03E-02 |
| cds.Camellia_sinensis.comp34817_c0_seq1_m.16288  | PREDICTED: SEC1 family transport protein SLY1-like<br>[Populus euphratica]                                                                                                       | 61.494 | 19.022 | 10.6 | 5  | 5  | 5  | 0.968 | 1.046 | 1.018 | 1.004 | 0.93  | 1.034 | 0.979 | 6.05E-01 |
| cds.Camellia_sinensis.comp34819_c0_seq1_m.987    | PREDICTED:<br>clathrin heavy chain 1<br>[Vigna radiata var. radiata]                                                                                                             | 192.51 | 323.31 | 33.8 | 56 | 98 | 10 | 0.993 | 0.984 | 0.972 | 1.026 | 0.999 | 1.031 | 1.036 | 3.73E-02 |
| cds.Camellia_sinensis.comp34819_c0_seq4_m.1484   | PREDICTED:<br>clathrin heavy chain 1-like<br>[Nelumbo nucifera]                                                                                                                  | 183.31 | 15.903 | 33.9 | 52 | 93 | 6  | 1.009 | 1.028 | 0.981 | 0.976 | 0.998 | 1.057 | 1.004 | 8.93E-01 |

|                       |                                                                 |        |        |      |    |    |    |       |       |       |       |       |       |       |          |
|-----------------------|-----------------------------------------------------------------|--------|--------|------|----|----|----|-------|-------|-------|-------|-------|-------|-------|----------|
| PREDICT               |                                                                 |        |        |      |    |    |    |       |       |       |       |       |       |       |          |
| cds.Camellia_sinensis | protease Do-like 7 isoform X1 [Vitis vinifera]                  | 122.44 | 79.554 | 17   | 18 | 20 | 12 | 1.004 | 1.018 | 1.014 | 1.006 | 0.981 | 0.968 | 0.973 | 8.67E-02 |
| PREDICT               |                                                                 |        |        |      |    |    |    |       |       |       |       |       |       |       |          |
| cds.Camellia_sinensis | protease Do-like 7 isoform X3 [Lupinus angustifolius]           | 27.768 | 36.057 | 33.5 | 8  | 9  | 3  | 0.96  | 0.994 | 1.073 | 1.047 | 0.98  | 0.986 | 0.995 | 9.23E-01 |
| PREDICT               |                                                                 |        |        |      |    |    |    |       |       |       |       |       |       |       |          |
| cds.Camellia_sinensis | allantoinease isoform X2 [Daucus carota subsp. sativus]         | 16.693 | 2.6798 | 21.6 | 2  | 2  | 2  |       |       |       |       |       |       |       |          |
| PREDICT               |                                                                 |        |        |      |    |    |    |       |       |       |       |       |       |       |          |
| cds.Camellia_sinensis | cellulose synthase-like protein G3 isoform X2 [Ziziphus jujuba] | 48.382 | 1.5015 | 3.7  | 2  | 2  | 2  | 0.977 | 1.088 | 0.996 | 0.951 | 0.978 | 1.012 | 0.961 | 3.57E-01 |



|                                |                                                                             |        |        |     |    |    |   |       |       |       |       |       |       |       |          |
|--------------------------------|-----------------------------------------------------------------------------|--------|--------|-----|----|----|---|-------|-------|-------|-------|-------|-------|-------|----------|
| cds.Camellia_sinensis.comp3485 | PREDICT<br>ED: pre-mRNA-processing protein 40A isoform X2 [Vitis vinifera]  | 44.437 | 4.0584 | 5.7 | 2  | 2  | 2 | 0.839 | 1.253 | 0.834 | 1.133 | 0.982 | 0.99  | 1.061 | 6.22E-01 |
| cds.Camellia_sinensis.comp3486 | DUF2921 family protein [Medicago truncatula]                                | 85.938 | 1.3491 | 1.1 | 1  | 1  | 1 |       |       |       |       |       |       |       |          |
| cds.Camellia_sinensis.comp3486 | PREDICT<br>ED: E3 ubiquitin-protein ligase UPL1 isoform X2 [Vitis vinifera] | 386.46 | 17.637 | 2.8 | 10 | 10 | 7 | 0.977 | 1.134 | 1.069 | 0.946 | 0.917 | 0.933 | 0.879 | 4.56E-02 |
| cds.Camellia_sinensis.comp3487 | PREDICT<br>ED: subtilisin-like protease SBT1.5 [Vitis vinifera]             | 82.486 | 28.675 | 10  | 6  | 8  | 6 | 0.868 | 0.89  | 0.923 | 1.12  | 1.119 | 1.104 | 1.247 | 2.79E-04 |

|                                |                                                                                           |        |        |      |    |    |    |       |       |       |       |       |       |       |          |
|--------------------------------|-------------------------------------------------------------------------------------------|--------|--------|------|----|----|----|-------|-------|-------|-------|-------|-------|-------|----------|
| cds.Camellia_sinensis.comp3487 | geranylgeranyl transferase type-2 subunit alpha 1 [Vitis vinifera]                        | 32.118 | 8.5522 | 7.7  | 2  | 2  | 2  | 0.818 | 0.963 | 0.674 | 1.281 | 0.953 | 1.373 | 1.469 | 6.55E-02 |
| cds.Camellia_sinensis.comp3488 | ubiquitin-protein ligase UPL2 [Vitis vinifera]                                            | 81.209 | 3.3157 | 6.6  | 4  | 5  | 3  | 0.93  | 1.076 | 1.02  | 0.981 | 1.078 | 0.931 | 0.988 | 8.52E-01 |
| cds.Camellia_sinensis.comp3489 | probable phosphoribosylglycinamide synthase, chloroplastic/mitochondrial [Vitis vinifera] | 154.82 | 113.16 | 22.6 | 29 | 43 | 29 | 0.97  | 1.018 | 0.99  | 1.004 | 1.003 | 0.994 | 1.008 | 6.12E-01 |
| cds.Camellia_sinensis.comp3489 | topless-related protein 3-like [Sesamum indicum]                                          | 30.977 | 13.056 | 25.2 | 7  | 10 | 4  | 0.892 | 0.96  | 0.847 | 0.924 | 1.016 | 1.098 | 1.126 | 1.30E-01 |

|                                |                                                                                        |        |        |      |    |    |    |       |       |       |       |       |       |       |          |
|--------------------------------|----------------------------------------------------------------------------------------|--------|--------|------|----|----|----|-------|-------|-------|-------|-------|-------|-------|----------|
| cds.Camellia_sinensis.comp3489 | PREDICTED:<br>DEXH-box<br>ATP-dependent RNA helicase DExH12-like<br>[Nelumbo nucifera] | 204.09 | 4.9096 | 0.9  | 2  | 2  | 2  |       |       |       |       |       |       |       |          |
| cds.Camellia_sinensis.comp3489 | PREDICTED: beta-glucosidase 44-like<br>[Citrus sinensis]                               | 14.95  | 1.4665 | 5.6  | 1  | 2  | 1  | 0.999 | 0.985 | 0.991 | 0.997 | 1.058 | 0.981 | 1.021 | 4.44E-01 |
| cds.Camellia_sinensis.comp3489 | PREDICTED:<br>probable ATP synthase 24 kDa subunit, mitochondrial<br>[Vitis vinifera]  | 28.086 | 121.01 | 54.8 | 17 | 51 | 17 | 1.028 | 1.028 | 1.029 | 0.976 | 0.979 | 0.964 | 0.946 | 7.22E-03 |
| cds.Camellia_sinensis.comp3489 | PREDICTED:<br>glutamine-tRNA ligase, cytoplasmic<br>[Vitis vinifera]                   | 90.976 | 54.287 | 23   | 18 | 28 | 18 | 0.999 | 0.974 | 0.984 | 1.015 | 0.965 | 1.041 | 1.022 | 4.22E-01 |

|                                                  |                                                                                         |        |        |      |   |    |   |       |       |       |       |       |       |       |          |
|--------------------------------------------------|-----------------------------------------------------------------------------------------|--------|--------|------|---|----|---|-------|-------|-------|-------|-------|-------|-------|----------|
| cds.Camellia_sinensis.comp3491_4_c0_seq1_m.885   | PREDICTED:<br>probable tRNA N6-adenosine threonylcarbamoyltransferase [Theobroma cacao] | 38.531 | 14.1   | 14.5 | 4 | 5  | 4 | 0.887 | 0.993 | 1.063 | 1.062 | 1.003 | 0.96  | 1.028 | 6.52E-01 |
| cds.Camellia_sinensis.comp3491_9_c0_seq1_m.38285 | PREDICTED: early light-induced protein, chloroplastic [Arachis ipaensis]                | 24.048 | 31.945 | 19.2 | 4 | 6  | 4 | 0.91  | 0.941 | 0.964 | 1.001 | 1.06  | 1.114 | 1.128 | 2.71E-02 |
| cds.Camellia_sinensis.comp3492_1_c0_seq1_m.57219 | PREDICTED:<br>chlorophyll a-b binding protein 151, chloroplastic [Ricinus communis]     | 12.857 | 43.093 | 12   | 2 | 19 | 2 | 0.939 | 0.937 | 0.937 | 1.068 | 1.065 | 1.056 | 1.134 | 1.75E-06 |
| cds.Camellia_sinensis.comp3492_7_c0_seq1_m.40973 | PREDICTED:<br>plastocyanin B'/B" [Ricinus communis]                                     | 17.157 | 87.079 | 38.2 | 3 | 42 | 3 | 0.945 | 0.96  | 0.924 | 1.099 | 1.024 | 1.067 | 1.128 | 6.78E-03 |

|                                |                   |                                                                                            |        |        |      |   |    |   |       |       |       |       |       |       |       |          |
|--------------------------------|-------------------|--------------------------------------------------------------------------------------------|--------|--------|------|---|----|---|-------|-------|-------|-------|-------|-------|-------|----------|
| cds.Camellia_sinensis.comp3492 | 9_c0_seq1_m.29202 | PREDICTED:<br>chlorophyll a-b binding protein CP24 10A, chloroplastic [Gossypium hirsutum] | 27.483 | 50.377 | 23.6 | 5 | 20 | 5 | 0.921 | 0.888 | 0.888 | 1.052 | 1.163 | 1.122 | 1.237 | 2.60E-03 |
| cds.Camellia_sinensis.comp3493 | 5_c0_seq1_m.42009 | PREDICTED:<br>ferredoxin [Ziziphus jujuba]                                                 | 15.691 | 2.9641 | 6.8  | 1 | 3  | 1 | 1.181 | 1.077 | 1.01  | 0.821 | 0.84  | 1.031 | 0.824 | 8.23E-02 |
| cds.Camellia_sinensis.comp3494 | 6_c0_seq1_m.36496 | PREDICTED:<br>photosystem I reaction center subunit XI, chloroplastic [Theobroma cacao]    | 22.982 | 84.35  | 17.5 | 5 | 13 | 5 | 0.869 | 0.963 | 0.929 | 1.103 | 1.088 | 1.113 | 1.197 | 4.24E-03 |
| cds.Camellia_sinensis.comp3495 | 0_c0_seq1_m.37352 | PREDICTED:<br>glutathione S-transferase-like [Sesamum indicum]                             | 23.86  | 65.342 | 56.6 | 9 | 36 | 9 | 0.99  | 0.996 | 0.937 | 1.056 | 1.01  | 1.026 | 1.058 | 7.35E-02 |



|                                |                                                                    |        |        |      |    |    |    |       |       |       |       |       |       |       |          |
|--------------------------------|--------------------------------------------------------------------|--------|--------|------|----|----|----|-------|-------|-------|-------|-------|-------|-------|----------|
| cds.Camellia_sinensis.comp3495 | PREDICT<br>ED:<br>carbonic anhydrase 2 isoform X1 [Vitis vinifera] | 35.791 | 244.11 | 66.1 | 18 | 90 | 16 | 1.094 | 1.066 | 1.096 | 0.93  | 0.936 | 0.901 | 0.85  | 3.84E-04 |
| cds.Camellia_sinensis.comp3497 | PREDICT<br>ED: 60S ribosomal protein L3 [Vitis vinifera] thylakoid | 44.428 | 36.622 | 27.2 | 13 | 26 | 9  | 1.095 | 1.107 | 1.126 | 0.905 | 0.858 | 0.869 | 0.791 | 2.00E-04 |
| cds.Camellia_sinensis.comp3497 | soluble phosphoprotein TSP9 [Medicago truncatula]                  | 11.379 | 18.233 | 44.8 | 6  | 28 | 6  | 1.06  | 1.051 | 1.045 | 0.943 | 0.941 | 0.951 | 0.898 | 3.70E-05 |
| cds.Camellia_sinensis.comp3497 | PREDICT<br>ED: 60S ribosomal protein L18-2 [Eucalyptus grandis]    | 20.934 | 55.785 | 28.3 | 5  | 9  | 5  | 1.09  | 1.074 | 1.055 | 0.895 | 0.954 | 0.906 | 0.856 | 2.00E-03 |
| cds.Camellia_sinensis.comp3497 | plant/F25P12-18 protein [Medicago truncatula]                      | 18.363 | 77.213 | 47.3 | 6  | 14 | 6  | 1.332 | 1.28  | 1.31  | 0.71  | 0.626 | 0.669 | 0.511 | 6.05E-05 |







|                                |                   |                                                                                    |        |        |      |    |    |    |       |       |       |       |       |       |       |          |
|--------------------------------|-------------------|------------------------------------------------------------------------------------|--------|--------|------|----|----|----|-------|-------|-------|-------|-------|-------|-------|----------|
| cds.Camellia_sinensis.comp3505 | 1_c0_seq1_m.22526 | PREDICTED:<br>geranylgeranyl diphosphate reductase, chloroplastic [Vitis vinifera] | 54.645 | 67.049 | 23   | 10 | 20 | 10 | 1.046 | 1.025 | 1.084 | 0.94  | 0.95  | 0.95  | 0.9   | 3.30E-03 |
| cds.Camellia_sinensis.comp3505 | 7_c0_seq1_m.37888 | PREDICTED:<br>thioredoxin F1, chloroplastic-like [Sesamum indicum]                 | 19.7   | 17.969 | 19.3 | 4  | 12 | 4  | 1.037 | 1.019 | 1.05  | 0.983 | 0.981 | 0.932 | 0.932 | 2.26E-02 |
| cds.Camellia_sinensis.comp3506 | 3_c0_seq1_m.37893 | PREDICTED:<br>peptidylprolyl cis-trans isomerase CYP19-4 [Malus domestica]         | 22.45  | 48.611 | 36.5 | 7  | 23 | 5  | 1.107 | 1.116 | 1.074 | 0.896 | 0.882 | 0.901 | 0.813 | 9.94E-05 |
| cds.Camellia_sinensis.comp3507 | 3_c0_seq1_m.47663 | PREDICTED:<br>40S ribosomal protein S25-2 [Citrus sinensis]                        | 14.911 | 4.9295 | 19   | 3  | 3  | 3  | 1.013 | 1.142 | 1.126 | 0.9   | 0.923 | 0.883 | 0.825 | 8.70E-03 |

|                                                  |                                                              |        |        |      |    |    |    |       |       |       |       |       |       |       |          |
|--------------------------------------------------|--------------------------------------------------------------|--------|--------|------|----|----|----|-------|-------|-------|-------|-------|-------|-------|----------|
|                                                  | PREDICT                                                      |        |        |      |    |    |    |       |       |       |       |       |       |       |          |
|                                                  | ED:                                                          |        |        |      |    |    |    |       |       |       |       |       |       |       |          |
| cds.Camellia_sinensis.comp3508_1_c0_seq1_m.58830 | elongation factor 1-alpha-like, partial [Gossypium arboreum] | 11.563 | 3.3328 | 63.5 | 7  | 29 | 1  | 0.963 | 1.092 | 0.998 | 1.059 | 0.748 | 1.145 | 0.967 | 7.39E-01 |
|                                                  | PREDICT                                                      |        |        |      |    |    |    |       |       |       |       |       |       |       |          |
|                                                  | ED:                                                          |        |        |      |    |    |    |       |       |       |       |       |       |       |          |
| cds.Camellia_sinensis.comp3510_6_c0_seq1_m.6667  | inositol-3-phosphate synthase [Nicotiana tomentosiformis]    | 56.19  | 186.79 | 29   | 16 | 49 | 16 | 0.901 | 0.884 | 0.874 | 1.103 | 1.142 | 1.123 | 1.267 | 6.03E-05 |
|                                                  | PREDICT                                                      |        |        |      |    |    |    |       |       |       |       |       |       |       |          |
|                                                  | ED: 60S                                                      |        |        |      |    |    |    |       |       |       |       |       |       |       |          |
| cds.Camellia_sinensis.comp3510_7_c0_seq1_m.44017 | ribosomal protein L30-like [Juglans regia]                   | 12.241 | 7.8302 | 16.1 | 2  | 5  | 2  | 1.018 | 1.038 | 1.011 | 0.963 | 0.994 | 0.931 | 0.942 | 4.20E-02 |
|                                                  | PREDICT                                                      |        |        |      |    |    |    |       |       |       |       |       |       |       |          |
|                                                  | ED:                                                          |        |        |      |    |    |    |       |       |       |       |       |       |       |          |
| cds.Camellia_sinensis.comp3511_3_c0_seq1_m.25625 | porphobilinogen deaminase, chloroplastic [Vitis vinifera]    | 41.897 | 22.951 | 17.7 | 7  | 11 | 7  | 1.047 | 1.068 | 1.072 | 0.916 | 0.94  | 0.946 | 0.879 | 4.63E-04 |



|                                                 |                                                                                           |        |        |      |    |    |    |       |       |       |       |       |       |       |          |
|-------------------------------------------------|-------------------------------------------------------------------------------------------|--------|--------|------|----|----|----|-------|-------|-------|-------|-------|-------|-------|----------|
| cds.Camellia_sinensis.comp35156_c0_seq1_m.46856 | PREDICTED:<br>succinate dehydrogenase subunit 7B, mitochondrial-like isoform X1 [Jatropha | 11.324 | 4.8037 | 9.9  | 1  | 4  | 1  | 0.996 | 0.916 | 1.028 | 0.985 | 1.029 | 1.021 | 1.032 | 4.25E-01 |
| cds.Camellia_sinensis.comp35173_c0_seq1_m.9433  | Elongation factor G [Morus notabilis]                                                     | 90.514 | 323.31 | 43.5 | 29 | 78 | 29 | 1.01  | 1     | 0.981 | 1.003 | 1.027 | 0.997 | 1.012 | 3.91E-01 |
| cds.Camellia_sinensis.comp35183_c0_seq1_m.41778 | PREDICTED:<br>nucleoside diphosphate kinase 1 [Daucus carota subsp. sativus]              | 16.414 | 70.709 | 33.8 | 6  | 15 | 6  | 0.941 | 0.943 | 0.98  | 1.051 | 1.036 | 1.051 | 1.096 | 2.86E-03 |
| cds.Camellia_sinensis.comp35195_c0_seq1_m.31710 | PREDICTED: 30S ribosomal protein S5, chloroplast ic-like [Gossypium raimondii]            | 37.255 | 98.51  | 32.1 | 12 | 29 | 12 | 1.087 | 1.034 | 1.07  | 0.914 | 0.935 | 0.923 | 0.869 | 9.60E-04 |



|                                |                   |                                                                                                                  |        |        |      |    |    |    |       |       |       |       |       |       |       |          |
|--------------------------------|-------------------|------------------------------------------------------------------------------------------------------------------|--------|--------|------|----|----|----|-------|-------|-------|-------|-------|-------|-------|----------|
| cds.Camellia_sinensis.comp3519 | 8_c0_seq1_m.15306 | PREDICT<br>ED:<br>pyruvate kinase, cytosolic isozyme [Jatropha curcas]                                           | 55.114 | 177.63 | 40   | 18 | 34 | 18 | 0.99  | 0.994 | 0.988 | 0.981 | 0.999 | 1.013 | 1.007 | 5.03E-01 |
| cds.Camellia_sinensis.comp3520 | 0_c0_seq1_m.30284 | PREDICT<br>ED: GDSL esterase/lipase 1-like [Fragaria vesca subsp. vesca]                                         | 40.596 | 1.9736 | 5.2  | 2  | 2  | 2  |       |       |       |       |       |       |       |          |
| cds.Camellia_sinensis.comp3521 | 7_c0_seq1_m.27870 | PREDICT<br>ED:<br>leucoanthocyanidin dioxygenase [Theobroma cacao]                                               | 40.057 | 51.661 | 24.5 | 7  | 9  | 7  | 1.343 | 1.36  | 1.416 | 0.567 | 0.584 | 0.561 | 0.416 | 8.03E-07 |
| cds.Camellia_sinensis.comp3522 | 9_c0_seq1_m.39687 | PREDICT<br>ED:<br>NADH dehydrogenase [ubiquinone] 1 alpha subcomplex subunit 13-B [Daucus carota subsp. sativus] | 21.891 | 23.45  | 38   | 7  | 15 | 7  | 1.016 | 0.995 | 0.988 | 0.993 | 1.004 | 1.002 | 1     | 9.95E-01 |





|                                                  |                                                                                   |        |        |      |    |    |   |       |       |       |       |       |       |       |          |
|--------------------------------------------------|-----------------------------------------------------------------------------------|--------|--------|------|----|----|---|-------|-------|-------|-------|-------|-------|-------|----------|
|                                                  | PREDICT                                                                           |        |        |      |    |    |   |       |       |       |       |       |       |       |          |
|                                                  | ED: 28                                                                            |        |        |      |    |    |   |       |       |       |       |       |       |       |          |
| cds.Camellia_sinensis.comp3529_1_c0_seq1_m.30274 | kDa<br>ribonucleo-<br>protein,<br>chloroplast<br>ic-like<br>[Nelumbo<br>nucifera] | 35.919 | 168.49 | 30.1 | 10 | 38 | 8 | 0.997 | 1.033 | 1.023 | 0.987 | 0.98  | 0.992 | 0.969 | 4.91E-02 |
|                                                  | PREDICT                                                                           |        |        |      |    |    |   |       |       |       |       |       |       |       |          |
|                                                  | ED: 24-                                                                           |        |        |      |    |    |   |       |       |       |       |       |       |       |          |
| cds.Camellia_sinensis.comp3529_3_c0_seq1_m.28986 | methylene<br>sterol C-<br>methyltran-<br>sferase 2<br>[Prunus<br>mume]            | 40.392 | 30.98  | 17.6 | 5  | 5  | 5 | 0.918 | 0.998 | 0.973 | 1.064 | 1.053 | 1.031 | 1.09  | 3.08E-02 |
|                                                  | PREDICT                                                                           |        |        |      |    |    |   |       |       |       |       |       |       |       |          |
|                                                  | ED:                                                                               |        |        |      |    |    |   |       |       |       |       |       |       |       |          |
| cds.Camellia_sinensis.comp3531_0_c0_seq1_m.46730 | endoplasm<br>in<br>homolog<br>[Vitis]                                             | 22.179 | 7.0517 | 28   | 6  | 9  | 4 | 0.969 | 0.909 | 0.949 | 1.018 | 1.081 | 1.084 | 1.126 | 1.30E-02 |
|                                                  | PREDICT                                                                           |        |        |      |    |    |   |       |       |       |       |       |       |       |          |
|                                                  | ED:                                                                               |        |        |      |    |    |   |       |       |       |       |       |       |       |          |
| cds.Camellia_sinensis.comp3532_1_c0_seq1_m.34345 | aquaporin<br>SIP1-1-<br>like<br>[Ziziphus<br>jujuba]                              | 28.011 | 1.9884 | 3.4  | 1  | 2  | 1 | 1.058 | 0.986 | 1.021 | 0.96  | 0.985 | 0.987 | 0.957 | 1.19E-01 |
|                                                  | PREDICT                                                                           |        |        |      |    |    |   |       |       |       |       |       |       |       |          |
|                                                  | ED:                                                                               |        |        |      |    |    |   |       |       |       |       |       |       |       |          |
| cds.Camellia_sinensis.comp3532_5_c0_seq1_m.38167 | desiccation<br>protectant<br>protein<br>Lea14<br>homolog<br>[Juglans<br>regia]    | 16.566 | 24.062 | 43.8 | 6  | 13 | 6 | 0.929 | 0.933 | 0.963 | 1.017 | 1.072 | 1.139 | 1.143 | 1.87E-02 |

|                                |                   |                                                                                 |        |        |      |   |    |   |       |       |       |       |       |       |       |          |
|--------------------------------|-------------------|---------------------------------------------------------------------------------|--------|--------|------|---|----|---|-------|-------|-------|-------|-------|-------|-------|----------|
| cds.Camellia_sinensis.comp3532 | 9_c0_seq1_m.34688 | PREDICT<br>ED: 50S ribosomal protein L5, chloroplast ic<br>[Sesamum indicum]    | 28.944 | 43.108 | 34.1 | 8 | 14 | 8 | 1.076 | 1.195 | 1.139 | 0.834 | 0.879 | 0.83  | 0.746 | 1.18E-03 |
| cds.Camellia_sinensis.comp3533 | 8_c0_seq1_m.58333 | PREDICT<br>ED: heat shock protein 90-2, partial<br>[Cucumis melo]               | 12.776 | 2.1117 | 34.3 | 4 | 10 | 2 | 1.158 | 1.072 | 1.072 | 0.874 | 0.884 | 0.907 | 0.807 | 1.58E-03 |
| cds.Camellia_sinensis.comp3534 | 5_c0_seq1_m.29931 | Thioredoxin family protein<br>[Arabidopsis thaliana]                            | 39.56  | 75.683 | 31.2 | 9 | 15 | 9 | 1.061 | 1.033 | 1.005 | 0.955 | 0.954 | 0.958 | 0.925 | 3.86E-02 |
| cds.Camellia_sinensis.comp3535 | 1_c0_seq1_m.16248 | PREDICT<br>ED: cytochrome P450 82C4-like<br>[Nicotiana tabacum]                 | 60.067 | 1.2892 | 1.7  | 1 | 1  | 1 |       |       |       |       |       |       |       |          |
| cds.Camellia_sinensis.comp3535 | 3_c0_seq1_m.47317 | PREDICT<br>ED: calvin cycle protein CP12-3, chloroplast ic<br>[Theobroma cacao] | 21.807 | 16.26  | 6.5  | 1 | 2  | 1 | 0.908 | 0.956 | 1.072 | 0.955 | 0.996 | 1.131 | 1.05  | 5.31E-01 |



|                                                  |                                                                                                       |        |        |      |    |    |   |       |       |       |       |       |       |       |          |
|--------------------------------------------------|-------------------------------------------------------------------------------------------------------|--------|--------|------|----|----|---|-------|-------|-------|-------|-------|-------|-------|----------|
| cds.Camellia_sinensis.comp3536_8_c0_seq1_m.58448 | PREDICTED:<br>ribulose biphosphate carboxylase/oxygenase activase, chloroplastic [Eucalyptus grandis] | 11.731 | 2.5004 | 43   | 4  | 33 | 1 | 1.041 | 1.002 | 1.078 | 0.93  | 1.007 | 0.938 | 0.921 | 6.66E-02 |
| cds.Camellia_sinensis.comp3536_9_c0_seq1_m.32992 | PREDICTED: ATP-dependent zinc metalloprotease FTSH, chloroplastic-like [Nicotiana tabacum]            | 38.443 | 100.36 | 34.8 | 11 | 31 | 5 | 0.997 | 0.99  | 0.97  | 1.006 | 1.022 | 1.004 | 1.025 | 6.56E-02 |
| cds.Camellia_sinensis.comp3537_6_c0_seq1_m.33068 | PREDICTED: light-harvesting complex-like protein 3 isotype 1, chloroplastic [Vitis vinifera]          | 28.668 | 74.731 | 24   | 7  | 13 | 7 | 1.023 | 1.022 | 1.051 | 0.943 | 1.002 | 0.929 | 0.928 | 3.96E-02 |

|                                |                   |                                                                                                     |        |        |      |    |    |    |       |       |       |       |       |       |       |          |
|--------------------------------|-------------------|-----------------------------------------------------------------------------------------------------|--------|--------|------|----|----|----|-------|-------|-------|-------|-------|-------|-------|----------|
| cds.Camellia_sinensis.comp3538 | 9_c0_seq1_m.56728 | PREDICT<br>ED: heat shock protein 90-1-like [Gossypium raimondii]                                   | 14.198 | 5.8399 | 33.1 | 3  | 6  | 1  | 1.074 | 1.207 | 1.064 | 0.879 | 0.839 | 0.909 | 0.785 | 6.77E-03 |
| cds.Camellia_sinensis.comp3539 | 0_c0_seq1_m.27691 | PREDICT<br>ED: thylakoid luminal 29 kDa protein, chloroplastic [Vitis vinifera]                     | 38.211 | 190.71 | 49.7 | 16 | 62 | 16 | 1.015 | 0.977 | 0.993 | 0.995 | 1.036 | 1.016 | 1.021 | 2.70E-01 |
| cds.Camellia_sinensis.comp3539 | 3_c0_seq1_m.41325 | PREDICT<br>ED: nascent polypeptide-associated complex subunit alpha-like protein 2 [Vitis vinifera] | 26.78  | 4.474  | 9.4  | 2  | 2  | 2  | 1.052 | 1.038 | 0.935 | 0.891 | 1.057 | 1.022 | 0.982 | 7.75E-01 |





|                                                  |                                                                                                              |        |        |      |    |    |    |       |       |       |       |       |       |       |          |
|--------------------------------------------------|--------------------------------------------------------------------------------------------------------------|--------|--------|------|----|----|----|-------|-------|-------|-------|-------|-------|-------|----------|
| cds.Camellia_sinensis.comp3542_4_c0_seq1_m.42554 | PREDICT<br>ED: calvin cycle protein CP12-1, chloroplastic [Vitis vinifera]                                   | 19.146 | 97.515 | 30.9 | 6  | 15 | 6  | 1.074 | 1.055 | 1.074 | 0.909 | 0.904 | 0.926 | 0.855 | 7.80E-05 |
| cds.Camellia_sinensis.comp3544_7_c0_seq1_m.38935 | PREDICT<br>ED: late embryogenesis abundant protein-like [Capsicum annuum]                                    | 24.057 | 49.586 | 31.7 | 7  | 18 | 7  | 1.134 | 1.079 | 1.144 | 0.881 | 0.852 | 0.87  | 0.775 | 2.56E-04 |
| cds.Camellia_sinensis.comp3545_5_c0_seq1_m.30880 | PREDICT<br>ED: probable cinnamyl alcohol dehydrogenase 6 isoform X1 [Jatropha curcas]                        | 42.005 | 19.105 | 9.4  | 4  | 8  | 4  | 1.051 | 0.997 | 1.009 | 1.01  | 0.964 | 0.974 | 0.964 | 1.64E-01 |
| cds.Camellia_sinensis.comp3545_9_c0_seq1_m.25644 | PREDICT<br>ED: chloroplastic stem-loop binding protein of 41 kDa b, chloroplastic isoform X2 [Juglans regia] | 42.393 | 139.42 | 52.4 | 19 | 69 | 19 | 1.073 | 1.031 | 1.033 | 0.955 | 0.957 | 0.943 | 0.91  | 2.42E-03 |

|                                                  |                                                                              |        |        |      |    |    |    |       |       |       |       |       |       |       |          |
|--------------------------------------------------|------------------------------------------------------------------------------|--------|--------|------|----|----|----|-------|-------|-------|-------|-------|-------|-------|----------|
|                                                  | PREDICT<br>ED:                                                               |        |        |      |    |    |    |       |       |       |       |       |       |       |          |
| cds.Camellia_sinensis.comp3546_6_c0_seq1_m.31835 | aspartate-semialdehyde dehydrogenase<br>[Arachis duranensis]                 | 42.612 | 126.71 | 37.2 | 11 | 22 | 11 | 0.98  | 1.007 | 1.016 | 0.968 | 1.009 | 0.951 | 0.975 | 2.84E-01 |
|                                                  | PREDICT<br>ED:                                                               |        |        |      |    |    |    |       |       |       |       |       |       |       |          |
| cds.Camellia_sinensis.comp3549_3_c0_seq1_m.19331 | aspartic proteinase-like isoform X1<br>[Nicotiana tabacum]                   | 56.98  | 17.012 | 14.3 | 6  | 7  | 6  | 1.003 | 1.06  | 1.002 | 0.979 | 0.937 | 0.993 | 0.949 | 1.10E-01 |
|                                                  | PREDICT<br>ED:                                                               |        |        |      |    |    |    |       |       |       |       |       |       |       |          |
| cds.Camellia_sinensis.comp3550_3_c0_seq1_m.31945 | probable pyridoxal 5'-phosphate synthase subunit PDX1<br>[Erythraea guttata] | 33.22  | 77.227 | 41.6 | 13 | 31 | 3  | 0.988 | 0.906 | 0.915 | 0.995 | 1.043 | 1.171 | 1.142 | 7.72E-02 |
|                                                  | PREDICT<br>ED:                                                               |        |        |      |    |    |    |       |       |       |       |       |       |       |          |
| cds.Camellia_sinensis.comp3552_2_c0_seq1_m.26786 | fructose-1,6-bisphosphatase, cytosolic<br>[Sesamum indicum]                  | 37.136 | 161.77 | 52.6 | 16 | 44 | 16 | 0.967 | 0.949 | 0.959 | 1.033 | 1.073 | 1.051 | 1.098 | 1.58E-03 |



|                                                                                                                  |                   |        |        |      |    |    |    |       |       |       |       |       |       |       |          |
|------------------------------------------------------------------------------------------------------------------|-------------------|--------|--------|------|----|----|----|-------|-------|-------|-------|-------|-------|-------|----------|
| cds.Camellia_sinensis.comp3556                                                                                   | 7_c0_seq1_m.24399 | 47.198 | 65.478 | 20.9 | 7  | 8  | 7  | 1.123 | 1.1   | 1.141 | 0.866 | 0.849 | 0.869 | 0.768 | 3.66E-05 |
| PREDICT<br>ED: basic<br>leucine zipper and W2 domain-containing protein 2-like<br>[Daucus carota subsp. sativus] |                   |        |        |      |    |    |    |       |       |       |       |       |       |       |          |
| cds.Camellia_sinensis.comp3556                                                                                   | 8_c0_seq1_m.15312 | 70.656 | 49.356 | 17.1 | 11 | 15 | 11 | 0.988 | 0.977 | 0.933 | 1.02  | 1.057 | 1.026 | 1.071 | 2.97E-02 |
| PREDICT<br>ED:<br>dolichyl-diphospho oligosaccharide--protein glycosyltransferase subunit 1A<br>[Vitis vinifera] |                   |        |        |      |    |    |    |       |       |       |       |       |       |       |          |
| cds.Camellia_sinensis.comp3557                                                                                   | 1_c0_seq1_m.42364 | 12.131 | 33.053 | 52.7 | 7  | 15 | 7  | 1.001 | 0.982 | 1.016 | 0.961 | 1.004 | 1.027 | 0.998 | 9.10E-01 |
| PREDICT<br>ED:<br>huntingtin-interacting protein K<br>[Sesamum indicum]                                          |                   |        |        |      |    |    |    |       |       |       |       |       |       |       |          |
| cds.Camellia_sinensis.comp3557                                                                                   | 7_c0_seq1_m.48965 | 22.539 | 30.279 | 19.8 | 4  | 8  | 1  | 1.026 | 1.01  | 0.996 | 0.979 | 1.058 | 0.935 | 0.98  | 5.98E-01 |
| PREDICT<br>ED: heat shock 70 kDa protein 15-like<br>[Prunus mume]                                                |                   |        |        |      |    |    |    |       |       |       |       |       |       |       |          |

|                                                                 |                                                                                                                                                                                                                                                                                                                |        |        |      |   |    |   |       |       |       |       |       |       |       |          |
|-----------------------------------------------------------------|----------------------------------------------------------------------------------------------------------------------------------------------------------------------------------------------------------------------------------------------------------------------------------------------------------------|--------|--------|------|---|----|---|-------|-------|-------|-------|-------|-------|-------|----------|
|                                                                 | PREDICT<br>ED:<br>probable<br>NADH<br>dehydroge<br>nase                                                                                                                                                                                                                                                        |        |        |      |   |    |   |       |       |       |       |       |       |       |          |
| cds.Camell<br>ia_sinensis<br>.comp3558<br>1_c0_seq1<br>_m.39136 | [ubiquinon<br>e] 1 alpha<br>subcomple<br>x subunit<br>12<br>[Nicotiana<br>attenuata]<br>PREDICT<br>ED:<br>putative<br>GDP-L-<br>fucose<br>synthase 2<br>[Eucalyptu<br>s grandis]<br>PREDICT<br>ED:<br>peptidyl-<br>prolyl cis-<br>trans<br>isomerase<br>FKBP17-<br>2,<br>chloroplast<br>ic [Vitis<br>vinifera] | 21.792 | 17.451 | 35.8 | 7 | 11 | 7 | 1.068 | 1.042 | 1.054 | 0.928 | 0.962 | 0.945 | 0.896 | 9.56E-04 |
| cds.Camell<br>ia_sinensis<br>.comp3558<br>2_c0_seq1<br>_m.29174 |                                                                                                                                                                                                                                                                                                                | 35.115 | 11.916 | 15.7 | 6 | 10 | 6 | 1.026 | 1.01  | 1.01  | 0.982 | 0.992 | 0.982 | 0.97  | 8.60E-03 |
| cds.Camell<br>ia_sinensis<br>.comp3558<br>4_c0_seq1<br>_m.33004 |                                                                                                                                                                                                                                                                                                                | 27.691 | 35.255 | 21.6 | 4 | 7  | 4 | 1.001 | 1.009 | 0.959 | 1.004 | 1.003 | 1.035 | 1.025 | 2.65E-01 |



|                                                  |                                                                                                   |        |        |      |    |    |    |       |       |       |       |       |       |       |          |
|--------------------------------------------------|---------------------------------------------------------------------------------------------------|--------|--------|------|----|----|----|-------|-------|-------|-------|-------|-------|-------|----------|
| cds.Camellia_sinensis.comp3561_4_c0_seq1_m.19095 | regulator of chromosome condensation family protein [Populus trichocarpa]                         | 57.099 | 14.624 | 9.2  | 5  | 5  | 5  | 0.984 | 1.055 | 0.976 | 1.048 | 0.978 | 0.943 | 0.985 | 7.12E-01 |
| cds.Camellia_sinensis.comp3561_9_c0_seq1_m.47230 | (Protein of unknown function, DUF538) [Arabidopsis thaliana]                                      | 18.162 | 9.4808 | 11.4 | 2  | 6  | 2  | 1.034 | 1.059 | 1.033 | 0.894 | 0.926 | 0.961 | 0.89  | 6.34E-03 |
| cds.Camellia_sinensis.comp3562_3_c0_seq1_m.29238 | PREDICTED: rhodanese-like domain-containing protein 11, chloroplastic isoform X1 [Vitis vinifera] | 33.647 | 54     | 36   | 9  | 11 | 9  | 1.043 | 1.036 | 1.059 | 0.984 | 0.948 | 0.956 | 0.92  | 3.10E-03 |
| cds.Camellia_sinensis.comp3564_1_c0_seq1_m.17743 | PREDICTED: 3-isopropyl malate dehydratase large subunit-like [Nicotiana glauca]                   | 55.293 | 94.438 | 40.2 | 17 | 35 | 17 | 0.98  | 1.01  | 1.004 | 1.002 | 1.034 | 1.005 | 1.016 | 3.17E-01 |



|                                                 |                                                                                                                                   |        |        |      |    |    |    |       |       |       |       |       |       |       |          |
|-------------------------------------------------|-----------------------------------------------------------------------------------------------------------------------------------|--------|--------|------|----|----|----|-------|-------|-------|-------|-------|-------|-------|----------|
| cds.Camellia_sinensis.comp35658_c0_seq1_m.42642 | PREDICT<br>ED:<br>cyanate<br>hydratase<br>2 isoform<br>X1<br>[Populus<br>euphratica]                                              | 21.41  | 135.07 | 48.2 | 8  | 23 | 8  | 0.921 | 0.945 | 0.917 | 1.086 | 1.084 | 1.073 | 1.165 | 1.15E-04 |
| cds.Camellia_sinensis.comp35664_c0_seq1_m.36076 | PREDICT<br>ED: heat<br>shock 70<br>kDa<br>protein 15-<br>like<br>[Gossypium<br>hirsutum]                                          | 21.054 | 11.653 | 26.6 | 6  | 10 | 4  | 1.05  | 1.048 | 1.015 | 0.899 | 0.954 | 1.041 | 0.93  | 1.65E-01 |
| cds.Camellia_sinensis.comp35666_c0_seq1_m.32810 | PREDICT<br>ED:<br>bifunctional protein<br>FoLD 2<br>[Vitis<br>vinifera]                                                           | 32.468 | 102.34 | 50.8 | 16 | 28 | 16 | 0.957 | 0.964 | 0.961 | 1.048 | 1.045 | 1.038 | 1.086 | 1.99E-05 |
| cds.Camellia_sinensis.comp35670_c0_seq1_m.50049 | PREDICT<br>ED: LOW<br>QUALITY<br>PROTEIN:<br>glutamate-<br>glyoxylate<br>aminotrans-<br>ferase 2-<br>like<br>[Sesamum<br>indicum] | 14.554 | 60.831 | 79.8 | 9  | 34 | 5  | 1.053 | 1.067 | 1.046 | 0.897 | 0.943 | 0.962 | 0.885 | 4.78E-03 |





|                                |                   |                                                                                                        |        |        |      |    |    |    |       |       |       |       |       |       |       |          |
|--------------------------------|-------------------|--------------------------------------------------------------------------------------------------------|--------|--------|------|----|----|----|-------|-------|-------|-------|-------|-------|-------|----------|
| cds.Camellia_sinensis.comp3573 | 6_c0_seq1_m.15954 | PREDICTED:<br>uncharacterized membrane protein<br>At1g16860-like<br>[Ipomoea nil]                      | 51.735 | 4.6506 | 4.3  | 2  | 2  | 2  | 0.83  | 1.179 | 1.029 | 1.032 | 1.028 | 0.93  | 0.984 | 9.53E-01 |
| cds.Camellia_sinensis.comp3575 | 7_c0_seq1_m.13862 | PREDICTED: 3-phosphoshikimate 1-carboxyvinyltransferase 2<br>[Juglans regia]                           | 55.63  | 53.83  | 20.8 | 9  | 18 | 9  | 1.124 | 1.158 | 1.158 | 0.814 | 0.822 | 0.808 | 0.71  | 3.33E-06 |
| cds.Camellia_sinensis.comp3576 | 5_c0_seq1_m.14995 | PREDICTED:<br>nephrocystin-3<br>[Daucus carota subsp. sativus]                                         | 66.62  | 9.7843 | 8.6  | 4  | 4  | 4  | 1.444 | 1.201 | 0.695 | 0.798 | 0.81  | 0.974 | 0.773 | 3.98E-01 |
| cds.Camellia_sinensis.comp3577 | 2_c0_seq1_m.9930  | PREDICTED:<br>glyoxysomal fatty acid beta-oxidation multifunctional protein MFP-a<br>[Jatropha curcas] | 79.026 | 73.568 | 31.3 | 23 | 46 | 23 | 0.973 | 0.977 | 1.004 | 1.019 | 1.023 | 1.012 | 1.034 | 3.20E-02 |

|                                                  |                                                                                                      |        |        |      |   |   |   |       |       |       |       |       |       |       |          |
|--------------------------------------------------|------------------------------------------------------------------------------------------------------|--------|--------|------|---|---|---|-------|-------|-------|-------|-------|-------|-------|----------|
| cds.Camellia_sinensis.comp3577_5_c0_seq1_m.39035 | PREDICT<br>ED: dnaJ<br>protein<br>homolog<br>[Nicotiana<br>tabacum]                                  | 26.466 | 2.2782 | 4.7  | 1 | 1 | 1 | 1.215 | 1.207 | 1.163 | 0.726 | 0.827 | 0.8   | 0.656 | 5.20E-04 |
| cds.Camellia_sinensis.comp3577_6_c0_seq1_m.30569 | PREDICT<br>ED: ER<br>membrane<br>protein<br>complex<br>subunit 10<br>[Theobroma<br>cacao]            | 33.904 | 5.3731 | 14.9 | 5 | 5 | 5 | 0.953 | 0.979 | 1.037 | 0.994 | 1.002 | 1.084 | 1.037 | 3.82E-01 |
| cds.Camellia_sinensis.comp3578_1_c0_seq1_m.36035 | PREDICT<br>ED:<br>putative<br>UDP-<br>rhamnose:ribo-<br>hamnosyltransferase 1<br>[Vitis<br>vinifera] | 35.201 | 3.8539 | 6    | 2 | 3 | 2 | 1.048 | 1.179 | 1.209 | 0.864 | 0.842 | 0.83  | 0.738 | 2.70E-03 |
| cds.Camellia_sinensis.comp3578_2_c0_seq1_m.21655 | PREDICT<br>ED:<br>calreticulin<br>-3-like<br>[Populus<br>euphratica]                                 | 53.159 | 24.522 | 16.7 | 8 | 8 | 6 | 1.088 | 1.068 | 1.125 | 0.905 | 0.942 | 0.868 | 0.827 | 2.50E-03 |

|                                                  |                                                                           |        |        |      |   |   |   |       |       |       |       |       |       |       |          |
|--------------------------------------------------|---------------------------------------------------------------------------|--------|--------|------|---|---|---|-------|-------|-------|-------|-------|-------|-------|----------|
|                                                  | PREDICT                                                                   |        |        |      |   |   |   |       |       |       |       |       |       |       |          |
|                                                  | ED:                                                                       |        |        |      |   |   |   |       |       |       |       |       |       |       |          |
|                                                  | single-                                                                   |        |        |      |   |   |   |       |       |       |       |       |       |       |          |
|                                                  | stranded                                                                  |        |        |      |   |   |   |       |       |       |       |       |       |       |          |
| cds.Camellia_sinensis.comp3578_8_c0_seq1_m.35839 | DNA-binding protein WHY1, chloroplast ic-like [Nicotiana tomentosiformis] | 30.892 | 78.031 | 32.7 | 7 | 8 | 7 | 0.987 | 1.008 | 0.987 | 0.961 | 0.993 | 1.023 | 0.998 | 9.24E-01 |
|                                                  | PREDICT                                                                   |        |        |      |   |   |   |       |       |       |       |       |       |       |          |
|                                                  | ED: GTP-                                                                  |        |        |      |   |   |   |       |       |       |       |       |       |       |          |
|                                                  | binding                                                                   |        |        |      |   |   |   |       |       |       |       |       |       |       |          |
| cds.Camellia_sinensis.comp3580_3_c0_seq1_m.54656 | protein SAR1A-like [Arachis ipaensis]                                     | 12.06  | 8.8721 | 50.5 | 4 | 9 | 1 | 1.027 | 0.972 | 1.022 | 0.938 | 1.053 | 0.991 | 0.987 | 7.33E-01 |
|                                                  | PREDICT                                                                   |        |        |      |   |   |   |       |       |       |       |       |       |       |          |
|                                                  | ED:                                                                       |        |        |      |   |   |   |       |       |       |       |       |       |       |          |
| cds.Camellia_sinensis.comp3581_2_c0_seq1_m.44084 | leiomodin-2 isoform X1 [Capsicum annuum]                                  | 19.714 | 21.876 | 17.7 | 4 | 9 | 4 | 1.02  | 0.951 | 1.004 | 0.995 | 1.048 | 1.028 | 1.032 | 2.87E-01 |
|                                                  | PREDICT                                                                   |        |        |      |   |   |   |       |       |       |       |       |       |       |          |
|                                                  | ED: heat                                                                  |        |        |      |   |   |   |       |       |       |       |       |       |       |          |
|                                                  | shock                                                                     |        |        |      |   |   |   |       |       |       |       |       |       |       |          |
| cds.Camellia_sinensis.comp3581_5_c0_seq1_m.45037 | factor-binding protein 1 [Theobroma cacao]                                | 14.518 | 21.426 | 32.6 | 4 | 5 | 4 | 0.941 | 0.963 | 0.972 | 1.052 | 1.045 | 1.031 | 1.088 | 1.76E-03 |

|                                                                                                                                                                                                                                                                                                                                                                                  |                   |        |        |      |    |    |    |       |       |       |       |       |       |       |          |
|----------------------------------------------------------------------------------------------------------------------------------------------------------------------------------------------------------------------------------------------------------------------------------------------------------------------------------------------------------------------------------|-------------------|--------|--------|------|----|----|----|-------|-------|-------|-------|-------|-------|-------|----------|
| cds.Camellia_sinensis.comp3582                                                                                                                                                                                                                                                                                                                                                   | 6_c0_seq1_m.50055 | 11.685 | 17.758 | 38.7 | 6  | 13 | 4  | 1.033 | 0.997 | 0.989 | 0.962 | 0.995 | 1.009 | 0.982 | 4.14E-01 |
| PREDICT<br>ED:<br>aldehyde<br>dehydroge<br>nase<br>family 2<br>member<br>B4,<br>mitochond<br>rial-like,<br>partial<br>[Malus<br>domestica]<br>PREDICT<br>ED: 4-<br>coumarate-<br>-CoA<br>ligase-like<br>7<br>[Nicotiana<br>tabacum]<br>PREDICT<br>ED:<br>apoptotic<br>chromatin<br>condensati<br>on inducer<br>in the<br>nucleus-<br>like<br>isoform<br>X2<br>[Juglans<br>regia] |                   |        |        |      |    |    |    |       |       |       |       |       |       |       |          |
| cds.Camellia_sinensis.comp3583                                                                                                                                                                                                                                                                                                                                                   | 6_c0_seq1_m.16144 | 59.481 | 116.84 | 36   | 18 | 29 | 18 | 0.996 | 0.981 | 0.989 | 1.007 | 1.003 | 1.028 | 1.024 | 5.29E-02 |
| cds.Camellia_sinensis.comp3585                                                                                                                                                                                                                                                                                                                                                   | 4_c0_seq1_m.36569 | 22.996 | 1.9246 | 7.1  | 2  | 3  | 2  | 1.021 | 1.101 | 1.113 | 0.922 | 0.885 | 0.946 | 0.851 | 8.48E-03 |

|                                                 |                                                                                |        |        |      |   |    |   |       |       |       |       |       |       |       |          |
|-------------------------------------------------|--------------------------------------------------------------------------------|--------|--------|------|---|----|---|-------|-------|-------|-------|-------|-------|-------|----------|
| cds.Camellia_sinensis.comp35858_c0_seq1_m.34257 | PREDICTED:<br>gamma carbonic anhydrase-like 2, mitochondrial [Jatropha curcas] | 27.529 | 18.788 | 17.1 | 5 | 9  | 5 | 1.019 | 1.04  | 1.046 | 0.949 | 0.917 | 1.058 | 0.942 | 2.31E-01 |
| cds.Camellia_sinensis.comp35860_c0_seq1_m.31307 | PREDICTED: beta-carotene isomerase D27, chloroplastic [Juglans regia]          | 31.178 | 4.6969 | 8.6  | 2 | 4  | 2 | 1.036 | 1.125 | 1.098 | 0.855 | 0.918 | 0.957 | 0.838 | 1.23E-02 |
| cds.Camellia_sinensis.comp35861_c0_seq1_m.53807 | PREDICTED: reticulon-like protein B1 [Vitis vinifera]                          | 16.668 | 1.5626 | 7.4  | 1 | 1  | 1 |       |       |       |       |       |       |       |          |
| cds.Camellia_sinensis.comp35876_c0_seq1_m.40720 | quinone reductase family protein [Arabidopsis lyrata subsp. lyrata]            | 21.74  | 132.29 | 53.7 | 9 | 16 | 5 | 0.973 | 1.041 | 1.053 | 1.039 | 1.008 | 0.929 | 0.97  | 5.02E-01 |



|                                                  |                                                                                                           |        |        |      |    |    |    |       |       |       |       |       |       |       |          |
|--------------------------------------------------|-----------------------------------------------------------------------------------------------------------|--------|--------|------|----|----|----|-------|-------|-------|-------|-------|-------|-------|----------|
|                                                  | PREDICT<br>ED:                                                                                            |        |        |      |    |    |    |       |       |       |       |       |       |       |          |
| cds.Camellia_sinensis.comp3588_0_c0_seq1_m.17775 | proline--<br>tRNA<br>ligase,<br>cytoplasmic-like<br>[Nelumbo<br>nucifera]                                 | 58.213 | 113.25 | 35.7 | 15 | 24 | 7  | 1.025 | 1.005 | 1.05  | 0.924 | 0.955 | 0.93  | 0.912 | 4.74E-03 |
|                                                  | PREDICT<br>ED:                                                                                            |        |        |      |    |    |    |       |       |       |       |       |       |       |          |
| cds.Camellia_sinensis.comp3588_4_c0_seq1_m.33763 | glutathione<br>S-<br>transferase<br>DHAR3,<br>chloroplast<br>ic-like<br>[Juglans<br>regia]                | 30.256 | 73.884 | 44.3 | 12 | 35 | 11 | 0.958 | 0.965 | 0.979 | 1.046 | 1.061 | 1.044 | 1.086 | 5.41E-04 |
|                                                  | PREDICT<br>ED:                                                                                            |        |        |      |    |    |    |       |       |       |       |       |       |       |          |
| cds.Camellia_sinensis.comp3588_7_c0_seq1_m.54467 | glycine<br>dehydrogenase<br>(decarboxylating),<br>mitochondrial<br>[Nelumbo<br>nucifera]<br>heterogeneous | 15.759 | 17.381 | 14.8 | 2  | 7  | 2  | 1.006 | 0.99  | 1     | 0.988 | 0.985 | 0.998 | 0.992 | 2.44E-01 |
|                                                  |                                                                                                           |        |        |      |    |    |    |       |       |       |       |       |       |       |          |
| cds.Camellia_sinensis.comp3589_0_c0_seq1_m.40314 | nuclear<br>ribonucleo<br>protein<br>A1-like 2<br>[Cajanus<br>cajan]                                       | 32.541 | 3.8679 | 9.5  | 3  | 11 | 2  | 1.005 | 1.014 | 0.997 | 0.971 | 1.071 | 0.991 | 1.006 | 8.83E-01 |

|                                                  |                                                                                         |        |        |      |    |    |    |       |       |       |       |       |       |       |          |
|--------------------------------------------------|-----------------------------------------------------------------------------------------|--------|--------|------|----|----|----|-------|-------|-------|-------|-------|-------|-------|----------|
|                                                  | PREDICT<br>ED:                                                                          |        |        |      |    |    |    |       |       |       |       |       |       |       |          |
| cds.Camellia_sinensis.comp3589_2_c0_seq1_m.47220 | putative UDP-rhamnose:ribose 5-phosphate UDP-glycosyltransferase 1 [Populus euphratica] | 18.03  | 2.0242 | 11.8 | 2  | 2  | 2  | 1.127 | 1.079 | 1.064 | 0.948 | 0.871 | 0.89  | 0.828 | 3.58E-03 |
|                                                  | PREDICT<br>ED: V-type proton ATPase subunit a3 [Vitis vinifera]                         |        |        |      |    |    |    |       |       |       |       |       |       |       |          |
| cds.Camellia_sinensis.comp3590_2_c0_seq1_m.7329  | ED: V-type proton ATPase subunit a3 [Vitis vinifera]                                    | 92.954 | 91.381 | 21.3 | 14 | 22 | 14 | 1.007 | 1.016 | 0.958 | 1.018 | 1.031 | 0.999 | 1.022 | 3.34E-01 |
|                                                  | PREDICT<br>ED:                                                                          |        |        |      |    |    |    |       |       |       |       |       |       |       |          |
| cds.Camellia_sinensis.comp3595_2_c0_seq1_m.28377 | calcyclin-binding protein [Vitis vinifera]                                              | 25.139 | 7.4392 | 14.8 | 4  | 4  | 4  | 0.99  | 0.969 | 0.988 | 0.988 | 1.023 | 1.031 | 1.032 | 9.92E-02 |
|                                                  | PREDICT<br>ED:                                                                          |        |        |      |    |    |    |       |       |       |       |       |       |       |          |
| cds.Camellia_sinensis.comp3595_6_c0_seq1_m.38504 | eukaryotic translation initiation factor 3 subunit K-like [Populus euphratica]          | 26.977 | 4.5408 | 14   | 4  | 4  | 4  | 0.862 | 0.946 | 0.943 | 1.141 | 1.037 | 1.092 | 1.189 | 1.36E-02 |

|                                |                   |                                                                                                |        |        |      |    |    |    |       |       |       |       |       |       |       |          |
|--------------------------------|-------------------|------------------------------------------------------------------------------------------------|--------|--------|------|----|----|----|-------|-------|-------|-------|-------|-------|-------|----------|
| cds.Camellia_sinensis.comp3595 | 9_c0_seq1_m.28749 | PREDICT ED: phosphoenolpyruvate carboxylase [Capsicum annuum]                                  | 37.521 | 78.93  | 49.2 | 15 | 27 | 10 | 1.027 | 1.035 | 1.021 | 0.941 | 0.974 | 0.954 | 0.931 | 2.60E-03 |
| cds.Camellia_sinensis.comp3596 | 0_c0_seq1_m.40073 | PREDICT ED: probable xyloglucan endotransglucosylase/hydrolase protein 21 [Gossypium hirsutum] | 25.651 | 18.331 | 6.6  | 1  | 1  | 1  | 1.073 | 0.99  | 0.922 | 0.931 | 1.013 | 1.067 | 1.009 | 8.86E-01 |
| cds.Camellia_sinensis.comp3596 | 1_c0_seq1_m.31683 | calcium homeostasis regulator 1 CHoR1 [Solanum tuberosum]                                      | 36.586 | 51.282 | 15.9 | 4  | 5  | 4  | 1.017 | 1.011 | 1.015 | 1.002 | 1.019 | 0.944 | 0.974 | 3.73E-01 |
| cds.Camellia_sinensis.comp3596 | 4_c0_seq1_m.25987 | PREDICT ED: photosystem II stability/assembly factor HCF136, chloroplastic [Nelumbo nucifera]  | 46.271 | 254.44 | 39   | 14 | 38 | 14 | 0.999 | 0.98  | 0.999 | 1.005 | 0.991 | 1.008 | 1.009 | 3.52E-01 |

|                                                  |                                                                                                   |        |        |      |    |    |    |       |       |       |       |       |       |       |          |
|--------------------------------------------------|---------------------------------------------------------------------------------------------------|--------|--------|------|----|----|----|-------|-------|-------|-------|-------|-------|-------|----------|
| cds.Camellia_sinensis.comp3598_c0_seq1_m.48410   | PREDICT<br>ED: trans-resveratrol di-O-methyltransferase [Vitis vinifera]                          | 21.142 | 23.263 | 28   | 4  | 6  | 4  | 0.892 | 0.868 | 0.888 | 1.126 | 1.156 | 1.145 | 1.294 | 2.14E-05 |
| cds.Camellia_sinensis.comp3599_1_c0_seq1_m.6464  | PREDICT<br>ED: beta-galactosidase 10 [Vitis vinifera]                                             | 103.07 | 37.854 | 18.6 | 17 | 22 | 15 | 1.083 | 1.062 | 1.061 | 0.875 | 0.941 | 0.948 | 0.862 | 4.88E-03 |
| cds.Camellia_sinensis.comp3600_1_c0_seq1_m.34430 | PREDICT<br>ED: vesicle-associated protein 4-like isoform X2 [Ipomoea nil]                         | 28.964 | 7.0504 | 16.7 | 4  | 4  | 4  | 0.992 | 0.97  | 1.086 | 0.902 | 1.003 | 1.049 | 0.969 | 6.00E-01 |
| cds.Camellia_sinensis.comp3601_4_c0_seq1_m.41139 | PREDICT<br>ED: RNA polymerase II subunit A C-terminal domain phosphatase SSU72 [Ricinus communis] | 22.681 | 7.3112 | 6.2  | 1  | 1  | 1  | 0.956 | 0.971 | 0.96  | 1.146 | 1.058 | 0.94  | 1.089 | 2.91E-01 |

|                                                  |                                                                                                         |        |        |      |   |    |   |       |       |       |       |       |       |       |          |
|--------------------------------------------------|---------------------------------------------------------------------------------------------------------|--------|--------|------|---|----|---|-------|-------|-------|-------|-------|-------|-------|----------|
| cds.Camellia_sinensis.comp3604_0_c0_seq1_m.13820 | PREDICT<br>ED: cell division<br>protein FtsZ homolog 2-1,<br>chloroplastic isoform X1 [Citrus sinensis] | 51.412 | 39.442 | 18.1 | 7 | 12 | 6 | 0.964 | 1.063 | 1.078 | 0.893 | 0.969 | 1     | 0.922 | 1.70E-01 |
| cds.Camellia_sinensis.comp3604_5_c0_seq1_m.37397 | PREDICT<br>ED:<br>nectarin-1 [Eucalyptus grandis]                                                       | 23.629 | 6.1942 | 11.1 | 3 | 6  | 3 | 1.015 | 0.968 | 1.035 | 0.994 | 1.024 | 1.022 | 1.007 | 7.49E-01 |
| cds.Camellia_sinensis.comp3606_8_c0_seq1_m.43701 | PREDICT<br>ED:<br>triosephosphate isomerase, cytosolic [Prunus mume]                                    | 17.268 | 119.61 | 47.5 | 6 | 16 | 6 | 0.986 | 0.965 | 0.964 | 1.08  | 1.006 | 1.028 | 1.068 | 4.20E-02 |
| cds.Camellia_sinensis.comp3606_9_c0_seq1_m.40367 | PREDICT<br>ED:<br>universal stress protein A-like protein [Nicotiana attenuata]                         | 17.951 | 19.571 | 23.9 | 4 | 7  | 4 | 0.976 | 1.019 | 0.955 | 1.016 | 1.01  | 1.022 | 1.033 | 1.63E-01 |

|                                                  |                                                                                                       |        |        |      |   |    |   |       |       |       |       |       |       |       |          |
|--------------------------------------------------|-------------------------------------------------------------------------------------------------------|--------|--------|------|---|----|---|-------|-------|-------|-------|-------|-------|-------|----------|
|                                                  | PREDICT                                                                                               |        |        |      |   |    |   |       |       |       |       |       |       |       |          |
|                                                  | ED:                                                                                                   |        |        |      |   |    |   |       |       |       |       |       |       |       |          |
| cds.Camellia_sinensis.comp3607_1_c0_seq1_m.59211 | reticulon-like protein B1 [Daucus carota subsp. sativus]                                              | 11.192 | 6.7362 | 18.8 | 2 | 2  | 2 | 1.062 | 1.019 | 1.045 | 0.91  | 1.002 | 0.954 | 0.917 | 4.47E-02 |
|                                                  | PREDICT                                                                                               |        |        |      |   |    |   |       |       |       |       |       |       |       |          |
|                                                  | ED:                                                                                                   |        |        |      |   |    |   |       |       |       |       |       |       |       |          |
| cds.Camellia_sinensis.comp3607_8_c0_seq1_m.57530 | elongation factor 1-delta-like [Juglans regia]                                                        | 12.047 | 3.4778 | 32.5 | 3 | 9  | 1 | 0.917 | 1.081 | 1.012 | 1.108 | 0.895 | 1.007 | 1     | 9.85E-01 |
|                                                  | PREDICT                                                                                               |        |        |      |   |    |   |       |       |       |       |       |       |       |          |
|                                                  | ED:                                                                                                   |        |        |      |   |    |   |       |       |       |       |       |       |       |          |
| cds.Camellia_sinensis.comp3611_9_c0_seq1_m.23684 | haloacid dehalogenase-like hydrolase domain-containing protein At3g48420 isoform X1 [Theobroma cacao] | 40.503 | 32.846 | 18.5 | 7 | 14 | 7 | 0.956 | 1.017 | 0.996 | 0.973 | 0.983 | 1.003 | 0.997 | 8.85E-01 |
|                                                  | PREDICT                                                                                               |        |        |      |   |    |   |       |       |       |       |       |       |       |          |
|                                                  | ED: 50S                                                                                               |        |        |      |   |    |   |       |       |       |       |       |       |       |          |
| cds.Camellia_sinensis.comp3613_2_c0_seq1_m.37343 | ribosomal protein L11, chloroplastic [Nicotiana tomentosiformis]                                      | 26.731 | 21.071 | 29.8 | 7 | 16 | 7 | 1.017 | 1.015 | 1.009 | 0.975 | 0.981 | 0.978 | 0.965 | 2.64E-04 |

|                                                 |                                                                                                    |        |        |      |   |   |   |       |       |       |       |       |       |       |          |
|-------------------------------------------------|----------------------------------------------------------------------------------------------------|--------|--------|------|---|---|---|-------|-------|-------|-------|-------|-------|-------|----------|
| cds.Camellia_sinensis.comp36154_c0_seq1_m.40268 | PREDICTED: 60S ribosome subunit biogenesis protein NIP7 homolog [Vitis vinifera]                   | 20.921 | 8.9644 | 9.1  | 1 | 1 | 1 | 0.855 | 0.963 | 1.21  | 1.027 | 1     | 0.974 | 0.991 | 9.91E-01 |
| cds.Camellia_sinensis.comp36157_c0_seq1_m.18410 | PREDICTED: preprotein translocase subunit SCY1, chloroplastic-like isoform X1 [Populus euphratica] | 59.383 | 14.664 | 16.2 | 8 | 8 | 8 | 0.954 | 0.955 | 0.958 | 1.049 | 1.069 | 1.012 | 1.092 | 3.23E-02 |
| cds.Camellia_sinensis.comp36191_c0_seq1_m.43051 | verprolin [Ananas comosus]                                                                         | 14.126 | 2.0647 | 6.8  | 1 | 1 | 1 | 0.992 | 0.947 | 1.003 | 1.003 | 1.044 | 1.026 | 1.045 | 1.07E-01 |
| cds.Camellia_sinensis.comp36199_c0_seq1_m.25892 | PREDICTED: very-long-chain 3-oxoacyl-CoA reductase 1 [Juglans regia]                               | 35.595 | 5.1761 | 11.2 | 4 | 4 | 4 | 1.276 | 1.221 | 1.168 | 0.709 | 0.7   | 0.803 | 0.604 | 5.62E-04 |

|                                                  |                                                                |        |        |      |   |   |   |       |       |       |       |       |       |       |          |
|--------------------------------------------------|----------------------------------------------------------------|--------|--------|------|---|---|---|-------|-------|-------|-------|-------|-------|-------|----------|
| cds.Camellia_sinensis.comp3626_2_c0_seq1_m.44784 | transmembrane protein [Arabidopsis thaliana] PREDICTED:        | 14.622 | 38.584 | 17.3 | 4 | 6 | 4 | 1.009 | 1.026 | 0.981 | 0.946 | 1.015 | 1.037 | 0.994 | 8.41E-01 |
| cds.Camellia_sinensis.comp3628_1_c0_seq1_m.57270 | aspartic proteinase-like isoform X1 [Juglans regia] PREDICTED: | 12.684 | 13.27  | 20.7 | 2 | 5 | 2 | 0.973 | 1.028 | 1.001 | 0.955 | 1.022 | 1.031 | 1.002 | 9.57E-01 |
| cds.Camellia_sinensis.comp3629_0_c0_seq1_m.44094 | protein canopy-1 [Vitis vinifera] PREDICTED:                   | 23.03  | 17.86  | 23.8 | 4 | 7 | 4 | 1.118 | 1.167 | 1.194 | 0.83  | 0.834 | 0.834 | 0.718 | 3.40E-03 |
| cds.Camellia_sinensis.comp3630_6_c0_seq1_m.27863 | uridylylate kinase-like [Nicotiana tabacum] PREDICTED:         | 37.36  | 6.6769 | 7.2  | 2 | 2 | 2 | 0.889 | 0.919 | 1.01  | 1.068 | 1.096 | 1.056 | 1.143 | 2.76E-02 |
| cds.Camellia_sinensis.comp3631_1_c0_seq1_m.37088 | cytosolic sulfotransferase 15-like [Populus euphratica]        | 37.427 | 3.1918 | 9    | 3 | 5 | 2 | 0.922 | 1.043 | 0.965 | 0.962 | 1.029 | 1.096 | 1.054 | 3.74E-01 |





|                                                  |                                                                                         |        |        |      |   |   |   |       |       |       |       |       |       |       |          |
|--------------------------------------------------|-----------------------------------------------------------------------------------------|--------|--------|------|---|---|---|-------|-------|-------|-------|-------|-------|-------|----------|
|                                                  | PREDICT                                                                                 |        |        |      |   |   |   |       |       |       |       |       |       |       |          |
|                                                  | ED: L-                                                                                  |        |        |      |   |   |   |       |       |       |       |       |       |       |          |
| cds.Camellia_sinensis.comp3640_2_c0_seq1_m.27301 | lactate dehydrogenase B-like<br>[Gossypium hirsutum]                                    | 37.778 | 18.094 | 10.3 | 3 | 3 | 3 | 0.987 | 0.991 | 0.997 | 0.952 | 0.987 | 1.094 | 1.019 | 7.15E-01 |
|                                                  | PREDICT                                                                                 |        |        |      |   |   |   |       |       |       |       |       |       |       |          |
|                                                  | ED:                                                                                     |        |        |      |   |   |   |       |       |       |       |       |       |       |          |
| cds.Camellia_sinensis.comp3640_9_c0_seq1_m.19147 | translation initiation factor IF-2-like<br>[Solanum pennellii]                          | 52.942 | 1.4165 | 2.2  | 1 | 1 | 1 |       |       |       |       |       |       |       |          |
|                                                  | PREDICT                                                                                 |        |        |      |   |   |   |       |       |       |       |       |       |       |          |
|                                                  | ED:                                                                                     |        |        |      |   |   |   |       |       |       |       |       |       |       |          |
| cds.Camellia_sinensis.comp3642_4_c0_seq1_m.18168 | protein LURP-one-related 10-like<br>[Nicotiana glauca]                                  | 25.015 | 1.57   | 6.3  | 2 | 2 | 2 | 1.002 | 0.955 | 1.003 | 0.968 | 1.098 | 0.987 | 1.031 | 5.23E-01 |
|                                                  | PREDICT                                                                                 |        |        |      |   |   |   |       |       |       |       |       |       |       |          |
|                                                  | ED:                                                                                     |        |        |      |   |   |   |       |       |       |       |       |       |       |          |
| cds.Camellia_sinensis.comp3643_1_c0_seq1_m.41059 | FKBP-type peptidyl-prolyl cis-trans isomerase 3 family protein<br>[Populus trichocarpa] | 24.262 | 9.5421 | 13   | 2 | 4 | 2 | 1.033 | 1.072 | 0.976 | 0.953 | 0.961 | 0.96  | 0.933 | 1.29E-01 |

|                                                  |                                                              |        |        |     |   |   |   |       |       |       |       |       |       |       |          |
|--------------------------------------------------|--------------------------------------------------------------|--------|--------|-----|---|---|---|-------|-------|-------|-------|-------|-------|-------|----------|
|                                                  | PREDICT                                                      |        |        |     |   |   |   |       |       |       |       |       |       |       |          |
| cds.Camellia_sinensis.comp3648_3_c0_seq1_m.36245 | ED: early nodulin-like protein 1 [Nicotiana attenuata]       | 30.285 | 2.1488 | 3.6 | 1 | 1 | 1 | 0.918 | 0.881 | 0.91  | 1.099 | 1.14  | 1.093 | 1.23  | 3.40E-04 |
|                                                  | PREDICT                                                      |        |        |     |   |   |   |       |       |       |       |       |       |       |          |
|                                                  | ED:                                                          |        |        |     |   |   |   |       |       |       |       |       |       |       |          |
| cds.Camellia_sinensis.comp3648_5_c0_seq1_m.31618 | protein OS-9 homolog [Daucus carota subsp. sativus]          | 40.345 | 5.6964 | 8.9 | 3 | 3 | 3 | 0.961 | 0.919 | 1.064 | 1.104 | 0.987 | 0.991 | 1.047 | 4.60E-01 |
|                                                  | PREDICT                                                      |        |        |     |   |   |   |       |       |       |       |       |       |       |          |
|                                                  | ED:                                                          |        |        |     |   |   |   |       |       |       |       |       |       |       |          |
| cds.Camellia_sinensis.comp3651_4_c0_seq1_m.48039 | glycine-rich RNA-binding protein RZ1B-like [Ziziphus jujuba] | 16.847 | 1.4399 | 4.5 | 1 | 1 | 1 | 1.183 | 1.11  | 1.186 | 0.703 | 0.871 | 0.893 | 0.709 | 1.15E-02 |
|                                                  | PREDICT                                                      |        |        |     |   |   |   |       |       |       |       |       |       |       |          |
|                                                  | ED:                                                          |        |        |     |   |   |   |       |       |       |       |       |       |       |          |
| cds.Camellia_sinensis.comp3652_2_c0_seq1_m.30982 | replication factor C subunit 2 [Eucalyptus grandis]          | 38.637 | 4.6018 | 8.1 | 2 | 2 | 2 | 0.932 | 0.997 | 0.992 | 1.061 | 1.04  | 1.003 | 1.063 | 8.86E-02 |

|                                                  |                                                                       |        |        |      |    |    |    |       |       |       |       |       |       |       |          |
|--------------------------------------------------|-----------------------------------------------------------------------|--------|--------|------|----|----|----|-------|-------|-------|-------|-------|-------|-------|----------|
|                                                  | PREDICT<br>ED: LOW<br>QUALITY                                         |        |        |      |    |    |    |       |       |       |       |       |       |       |          |
| cds.Camellia_sinensis.comp3653_0_c0_seq1_m.37183 | PROTEIN:<br>tropinone reductase-like 3 [Daucus carota subsp. sativus] | 29.649 | 3.7353 | 6.9  | 2  | 3  | 2  | 1.022 | 1.05  | 1.012 | 1.013 | 0.951 | 0.954 | 0.946 | 7.55E-02 |
|                                                  | PREDICT<br>ED:                                                        |        |        |      |    |    |    |       |       |       |       |       |       |       |          |
| cds.Camellia_sinensis.comp3653_9_c0_seq1_m.4777  | mannosylglycoprotein endobeta-mannosidase [Vitis]                     | 110.57 | 21.426 | 11.1 | 10 | 10 | 10 | 0.982 | 0.996 | 0.994 | 1.028 | 1.008 | 0.982 | 1.015 | 3.38E-01 |
|                                                  | PREDICT<br>ED: V-type                                                 |        |        |      |    |    |    |       |       |       |       |       |       |       |          |
| cds.Camellia_sinensis.comp3654_9_c0_seq1_m.49530 | proton ATPase 16 kDa proteolipid subunit [Fragaria vesca subsp.]      | 14.909 | -2     | 12.1 | 1  | 1  | 1  | 0.835 | 0.897 | 1     | 1.128 | 1.229 | 0.967 | 1.217 | 9.10E-02 |
|                                                  | PREDICT<br>ED:                                                        |        |        |      |    |    |    |       |       |       |       |       |       |       |          |
| cds.Camellia_sinensis.comp3655_5_c0_seq1_m.57037 | polyubiquitin, partial [Raphanus sativus]                             | 13.224 | 117.67 | 74.6 | 6  | 46 | 6  | 1.039 | 1.011 | 1.006 | 0.948 | 0.974 | 0.982 | 0.95  | 2.52E-02 |

|                                |                   |                                                                         |        |        |      |    |    |    |       |       |       |       |       |       |       |          |
|--------------------------------|-------------------|-------------------------------------------------------------------------|--------|--------|------|----|----|----|-------|-------|-------|-------|-------|-------|-------|----------|
| cds.Camellia_sinensis.comp3656 | 4_c0_seq1_m.18010 | PREDICT ED: protein disulfide isomerase-like 1-4 [Populus euphratica]   | 67.5   | 27.807 | 10.8 | 7  | 7  | 7  | 1.04  | 1.014 | 1.06  | 0.973 | 0.957 | 0.921 | 0.916 | 1.30E-02 |
| cds.Camellia_sinensis.comp3656 | 8_c0_seq1_m.11790 | PREDICT ED: protein SIEVE ELEMENT OCCLUSION B [Ricinus communis]        | 83.418 | 263.13 | 38.9 | 26 | 50 | 26 | 0.934 | 0.941 | 0.938 | 1.051 | 1.088 | 1.064 | 1.139 | 2.37E-04 |
| cds.Camellia_sinensis.comp3657 | 1_c0_seq1_m.32975 | PREDICT ED: casein kinase 1-like protein 2 [Nicotiana attenuata]        | 20.561 | 6.7704 | 6.2  | 1  | 1  | 1  |       |       |       |       |       |       |       |          |
| cds.Camellia_sinensis.comp3657 | 6_c0_seq1_m.20868 | PREDICT ED: UDP-N-acetylglucosamine diphosphorylase 1 [Citrus sinensis] | 55.479 | 13.619 | 8.6  | 3  | 4  | 3  | 1.05  | 1     | 0.98  | 0.959 | 0.945 | 1.038 | 0.971 | 4.48E-01 |
| cds.Camellia_sinensis.comp3658 | 0_c0_seq1_m.17447 | PREDICT ED: protein FLX-like 2 [Ziziphus jujuba]                        | 50.983 | 79.218 | 40.1 | 19 | 26 | 19 | 1.004 | 1.029 | 0.972 | 1.012 | 0.974 | 1.011 | 0.997 | 9.08E-01 |

|                                                  |                                                                                                                                       |        |        |      |   |    |   |       |       |       |       |       |       |       |          |
|--------------------------------------------------|---------------------------------------------------------------------------------------------------------------------------------------|--------|--------|------|---|----|---|-------|-------|-------|-------|-------|-------|-------|----------|
|                                                  | PREDICT                                                                                                                               |        |        |      |   |    |   |       |       |       |       |       |       |       |          |
|                                                  | ED:                                                                                                                                   |        |        |      |   |    |   |       |       |       |       |       |       |       |          |
| cds.Camellia_sinensis.comp3660.2_c0_seq1_m.7660  | carbon catabolite repressor protein 4 homolog 1 [Pyrus x bretschneideri]                                                              | 66.865 | 4.0721 | 1.8  | 1 | 1  | 1 |       |       |       |       |       |       |       |          |
|                                                  | PREDICT                                                                                                                               |        |        |      |   |    |   |       |       |       |       |       |       |       |          |
|                                                  | ED:                                                                                                                                   |        |        |      |   |    |   |       |       |       |       |       |       |       |          |
| cds.Camellia_sinensis.comp3660.6_c0_seq1_m.29147 | phosphoglucuronate mutase-like protein 1 [Prunus mume] calcium-dependent phosphotriesterase superfamily protein [Medicago truncatula] | 39.804 | 20.594 | 15.7 | 5 | 7  | 5 | 1.023 | 1.074 | 1.016 | 0.95  | 0.981 | 0.994 | 0.94  | 4.79E-02 |
| cds.Camellia_sinensis.comp3661.2_c0_seq1_m.34117 | phosphotriesterase superfamily protein [Medicago truncatula]                                                                          | 36.199 | 59.094 | 37   | 9 | 15 | 9 | 0.973 | 0.956 | 1.003 | 1.013 | 1.03  | 1.018 | 1.044 | 4.37E-02 |
|                                                  | PREDICT                                                                                                                               |        |        |      |   |    |   |       |       |       |       |       |       |       |          |
|                                                  | ED:                                                                                                                                   |        |        |      |   |    |   |       |       |       |       |       |       |       |          |
| cds.Camellia_sinensis.comp3662.7_c0_seq1_m.24222 | chlorophyll synthase, chloroplastic [Prunus mume]                                                                                     | 40.487 | 27.013 | 8.8  | 2 | 2  | 2 | 0.941 | 0.949 | 0.958 | 1.071 | 1.07  | 1.039 | 1.117 | 6.02E-04 |

|                                                  |                                                                                                         |        |        |      |    |    |   |       |       |       |       |       |       |       |          |
|--------------------------------------------------|---------------------------------------------------------------------------------------------------------|--------|--------|------|----|----|---|-------|-------|-------|-------|-------|-------|-------|----------|
| cds.Camellia_sinensis.comp3667_0_c0_seq1_m.28249 | PREDICTED: replication factor C subunit 3 [Gossypium raimondii]                                         | 41.896 | 6.6658 | 11.7 | 5  | 5  | 5 | 0.973 | 0.972 | 0.932 | 1.023 | 1.053 | 1.048 | 1.086 | 7.94E-03 |
| cds.Camellia_sinensis.comp3669_6_c0_seq1_m.28755 | PREDICTED: probable pyridoxal 5'-phosphate synthase subunit PDX1 [Daucus carota subsp. sativus]         | 37.041 | 3.3632 | 35.2 | 12 | 31 | 2 | 0.952 | 0.948 | 0.955 | 1.059 | 1.047 | 1.061 | 1.109 | 2.21E-05 |
| cds.Camellia_sinensis.comp3670_0_c0_seq1_m.39603 | sodium/calcium exchanger family protein / calcium-binding EF hand family protein [Arabidopsis thaliana] | 34.335 | 11.168 | 9.8  | 2  | 2  | 2 | 0.883 | 0.923 | 1.071 | 1.15  | 0.965 | 1.045 | 1.098 | 2.88E-01 |





|                                |                                                                                                                     |        |        |      |    |    |    |       |       |       |       |       |       |       |          |
|--------------------------------|---------------------------------------------------------------------------------------------------------------------|--------|--------|------|----|----|----|-------|-------|-------|-------|-------|-------|-------|----------|
| cds.Camellia_sinensis.comp3675 | PREDICT<br>ED: actin-related protein 4 isoform X1<br>[Ziziphus jujuba]                                              | 54.079 | 45.258 | 32.4 | 11 | 11 | 11 | 0.965 | 1.095 | 0.948 | 1.053 | 1.003 | 0.994 | 1.014 | 7.65E-01 |
| cds.Camellia_sinensis.comp3676 | PREDICT<br>ED:<br>organellar oligopeptidase A, chloroplast<br>ic/mitochondrial-like, partial<br>[Nicotiana tabacum] | 11.713 | 7.6225 | 34   | 4  | 7  | 4  | 0.911 | 0.965 | 1.006 | 1.062 | 1.034 | 1.03  | 1.085 | 5.39E-02 |
| cds.Camellia_sinensis.comp3680 | PREDICT<br>ED:<br>aldehyde dehydrogenase family 2 member B7, mitochondrial<br>[Eucalyptus grandis]                  | 14.435 | 56.327 | 53.4 | 5  | 9  | 5  | 0.939 | 0.924 | 0.941 | 1.091 | 1.048 | 1.07  | 1.144 | 4.81E-04 |
| cds.Camellia_sinensis.comp3680 | transmembrane protein, putative<br>[Medicago truncatula]                                                            | 17.492 | 24.943 | 23.1 | 3  | 4  | 3  | 0.99  | 0.979 | 0.987 | 1.012 | 1.023 | 1.003 | 1.028 | 1.44E-02 |

|                                |                                                                          |        |        |      |   |    |   |       |       |       |       |       |       |       |          |
|--------------------------------|--------------------------------------------------------------------------|--------|--------|------|---|----|---|-------|-------|-------|-------|-------|-------|-------|----------|
| cds.Camellia_sinensis.comp3684 | probable mitochondrial- processing peptidase subunit beta [Cucumis melo] | 14.372 | 10.274 | 24.8 | 3 | 5  | 1 | 0.958 | 1.025 | 1.031 | 1.045 | 0.953 | 1.003 | 0.996 | 9.06E-01 |
| cds.Camellia_sinensis.comp3686 | PREDICTED: pectin acylesterase 8-like [Juglans regia]                    | 27.734 | 8.5182 | 11.8 | 3 | 4  | 3 | 1.013 | 1.032 | 1.043 | 0.988 | 0.966 | 0.961 | 0.944 | 8.74E-03 |
| cds.Camellia_sinensis.comp3694 | PREDICTED: probable phospholipid hydroperoxidase [Ricinus communis]      | 11.142 | 12.953 | 43   | 5 | 12 | 2 | 0.949 | 0.925 | 0.942 | 1.096 | 1.055 | 1.063 | 1.141 | 6.84E-04 |
| cds.Camellia_sinensis.comp3700 | PREDICTED: pre-mRNA-splicing factor SPF27 homolog [Vitis vinifera]       | 30.057 | 12.138 | 16.3 | 5 | 6  | 5 | 0.977 | 1.007 | 1.043 | 0.989 | 1.021 | 0.979 | 0.987 | 6.13E-01 |

|                                |                   |                                                                                            |        |        |      |   |    |   |       |       |       |       |       |       |       |          |
|--------------------------------|-------------------|--------------------------------------------------------------------------------------------|--------|--------|------|---|----|---|-------|-------|-------|-------|-------|-------|-------|----------|
| cds.Camellia_sinensis.comp3702 | 4_c0_seq1_m.39511 | PREDICTED: small heat shock protein, chloroplast ic-like isoform X2<br>[Nelumbo nucifera]  | 22.449 | 19.429 | 35.2 | 6 | 13 | 6 | 0.975 | 0.953 | 1.013 | 1.047 | 1.035 | 1.02  | 1.055 | 5.04E-02 |
| cds.Camellia_sinensis.comp3709 | 1_c0_seq1_m.40308 | PREDICTED: ATP-dependent zinc metalloprotease FTSH 10, mitochondrial<br>[Ricinus communis] | 26.826 | 2.2185 | 4.6  | 1 | 1  | 1 | 1.121 | 1.153 | 0.984 | 0.92  | 0.902 | 0.895 | 0.834 | 2.23E-02 |
| cds.Camellia_sinensis.comp3711 | 8_c0_seq1_m.40237 | PREDICTED: eukaryotic translation initiation factor 4B2<br>[Vitis vinifera]                | 33.312 | 2.7258 | 3.3  | 1 | 1  | 1 | 1.038 | 1.117 | 1.147 | 0.874 | 0.969 | 0.839 | 0.812 | 1.61E-02 |
| cds.Camellia_sinensis.comp3712 | 4_c0_seq1_m.21044 | PREDICTED: chaperone protein dnaJ 10<br>[Prunus mume]                                      | 38.789 | 18.414 | 17.5 | 6 | 8  | 6 | 1.043 | 0.984 | 1.023 | 1.048 | 0.966 | 0.98  | 0.982 | 5.68E-01 |



|                                                  |                                                                                                        |        |        |      |   |   |   |       |       |       |       |       |       |       |          |
|--------------------------------------------------|--------------------------------------------------------------------------------------------------------|--------|--------|------|---|---|---|-------|-------|-------|-------|-------|-------|-------|----------|
| cds.Camellia_sinensis.comp3745.8_c0_seq1_m.24872 | PREDICT<br>ED: secondary independent protein translocase protein TATC, chloroplastic [Ziziphus jujuba] | 39.076 | 19.004 | 10.4 | 2 | 2 | 2 | 1.011 | 1.002 | 1.026 | 0.969 | 0.971 | 1.024 | 0.975 | 2.61E-01 |
| cds.Camellia_sinensis.comp3763.1_c0_seq1_m.44158 | PREDICT<br>ED: maviyani-like [Gossypium hirsutum]                                                      | 18.427 | 2.0941 | 9.7  | 2 | 2 | 2 | 1.13  | 1.157 | 1.213 | 0.833 | 0.807 | 0.818 | 0.702 | 1.01E-04 |
| cds.Camellia_sinensis.comp3763.3_c0_seq1_m.16602 | PREDICT<br>ED: sucrose transport protein SUC4 [Theobroma cacao]                                        | 54.176 | 1.9145 | 1.6  | 1 | 1 | 1 | 1.047 | 1.007 | 1.07  | 0.957 | 0.936 | 0.978 | 0.919 | 1.81E-02 |
| cds.Camellia_sinensis.comp3774.4_c0_seq1_m.41489 | PREDICT<br>ED: arabinosyltransferase RRA3-like [Nelumbo nucifera]                                      | 32.58  | 6.8766 | 4.8  | 1 | 1 | 1 | 1.043 | 0.934 | 1.031 | 0.96  | 0.992 | 1.041 | 0.995 | 9.23E-01 |
| cds.Camellia_sinensis.comp3790.7_c0_seq1_m.56509 | PREDICT<br>ED: fruit protein pKIWI502-like [Nicotiana tabacum]                                         | 13.301 | 20.582 | 28.7 | 3 | 5 | 2 | 1.178 | 0.977 | 1.112 | 0.877 | 0.985 | 0.844 | 0.828 | 6.03E-02 |

|                                                  |                                                                                                  |        |        |      |   |    |   |       |       |       |       |       |       |       |          |
|--------------------------------------------------|--------------------------------------------------------------------------------------------------|--------|--------|------|---|----|---|-------|-------|-------|-------|-------|-------|-------|----------|
| cds.Camellia_sinensis.comp3800_0_c0_seq1_m.28599 | PREDICT<br>ED:<br>prostaglandin E synthase 2-like<br>[Jatropha curcas]                           | 43.273 | 11.411 | 11   | 5 | 7  | 4 | 1.014 | 1.007 | 1.018 | 0.986 | 1.005 | 0.951 | 0.968 | 1.19E-01 |
| cds.Camellia_sinensis.comp3803_5_c0_seq1_m.22259 | PREDICT<br>ED: GDP-Man:Man(3)GlcNAc(2)-PP-Dol alpha-1,2-mannosyltransferase<br>[Citrus sinensis] | 52.521 | 11.603 | 7.5  | 3 | 4  | 3 | 0.822 | 0.906 | 1.033 | 1.124 | 1.008 | 1.056 | 1.155 | 1.15E-01 |
| cds.Camellia_sinensis.comp3805_0_c0_seq1_m.42138 | PREDICT<br>ED:<br>phenylalanine ammonia-lyase G4<br>[Ricinus communis]                           | 26.074 | 3.7057 | 24.1 | 7 | 13 | 3 | 1.227 | 1.231 | 1.292 | 0.762 | 0.75  | 0.707 | 0.592 | 4.47E-05 |
| cds.Camellia_sinensis.comp3809_5_c0_seq1_m.52871 | PREDICT<br>ED:<br>transmembrane protein 120 homolog<br>[Solanum tuberosum]                       | 14.949 | 12.507 | 23.1 | 3 | 5  | 2 | 0.985 | 1.116 | 1.022 | 0.973 | 0.95  | 0.954 | 0.921 | 9.94E-02 |

|                                |                                                                             |        |        |      |   |   |   |       |       |       |       |       |       |       |          |
|--------------------------------|-----------------------------------------------------------------------------|--------|--------|------|---|---|---|-------|-------|-------|-------|-------|-------|-------|----------|
| cds.Camellia_sinensis.comp3813 | amino-acid transaminase, chloroplastic<br>[Eucalyptus grandis]              | 39.473 | 5.1197 | 7.5  | 3 | 4 | 3 | 1.031 | 1.026 | 0.996 | 1     | 1.006 | 0.945 | 0.967 | 2.05E-01 |
| cds.Camellia_sinensis.comp3820 | flowering time control protein FY<br>[Vitis vinifera]                       | 81.936 | 5.6821 | 2.4  | 2 | 2 | 2 | 0.943 | 1.029 | 0.942 | 1.054 | 0.964 | 1.088 | 1.066 | 2.45E-01 |
| cds.Camellia_sinensis.comp3825 | glycine-rich RNA-binding protein 6, mitochondrial<br>[Prunus transmembrane] | 15.393 | 3.0006 | 9.4  | 1 | 1 | 1 |       |       |       |       |       |       |       |          |
| cds.Camellia_sinensis.comp3844 | putative protein, heat shock<br>[Medicago truncatula]                       | 37.351 | 3.9296 | 3    | 1 | 1 | 1 | 0.92  | 0.977 | 1.022 | 1.038 | 1.067 | 1.003 | 1.065 | 1.47E-01 |
| cds.Camellia_sinensis.comp3851 | protein binding protein<br>[Arabidopsis lyrata subsp. lyrata]               | 33.03  | 8.6961 | 12.8 | 4 | 6 | 4 | 1.004 | 1.024 | 1.059 | 0.955 | 0.964 | 0.994 | 0.944 | 4.24E-02 |





|                                                                                                                                        |                   |        |        |     |   |   |   |       |       |       |       |       |       |       |          |
|----------------------------------------------------------------------------------------------------------------------------------------|-------------------|--------|--------|-----|---|---|---|-------|-------|-------|-------|-------|-------|-------|----------|
| cds.Camellia_sinensis.comp3866                                                                                                         | 4_c0_seq1_m.43903 | 26.14  | 2.2908 | 5.2 | 1 | 1 | 1 | 0.969 | 1.068 | 1.157 | 0.921 | 0.903 | 0.979 | 0.878 | 8.62E-02 |
| PREDICTED:<br>protein<br>HOMOLOG OF<br>MAMMALIAN<br>LYST-INTERACTING<br>PROTEIN 5-like isoform X2<br>[Ziziphus jujuba]                 |                   |        |        |     |   |   |   |       |       |       |       |       |       |       |          |
| cds.Camellia_sinensis.comp3892                                                                                                         | 7_c0_seq1_m.45078 | 26.622 | 1.8582 | 9.7 | 2 | 4 | 1 | 1.027 | 0.988 | 1.012 | 1.006 | 0.946 | 1.025 | 0.983 | 5.57E-01 |
| PREDICTED:<br>dihydrolipoyllysine-residue acetyltransferase component 1 of pyruvate dehydrogenase complex, mitochondrial [Prunus mume] |                   |        |        |     |   |   |   |       |       |       |       |       |       |       |          |





|                                                    |                                                                                              |        |        |      |   |    |   |       |       |       |       |       |       |       |          |
|----------------------------------------------------|----------------------------------------------------------------------------------------------|--------|--------|------|---|----|---|-------|-------|-------|-------|-------|-------|-------|----------|
| cds.Camellia_sinensis.comp3997_1_c0_seq1_m.51236   | PREDICTED:<br>glycine-rich RNA-binding protein RZ1C isoform X1 [Fragaria vesca subsp. vesca] | 12.197 | 2.0356 | 7.6  | 1 | 1  | 1 | 1.315 | 1.349 | 1.269 | 0.589 | 0.705 | 0.673 | 0.5   | 2.57E-04 |
| cds.Camellia_sinensis.comp4012_76_c0_seq1_m.5925_8 | PREDICTED: beta-glucosidase 12-like [Jatropha curcas]                                        | 10.919 | 14.908 | 20   | 2 | 3  | 2 | 1.056 | 1.011 | 1.061 | 0.966 | 0.984 | 0.919 | 0.917 | 2.75E-02 |
| cds.Camellia_sinensis.comp4016_2_c0_seq1_m.14618   | PREDICTED: aldehyde dehydrogenase family 3 member H1 isoform X1 [Vitis vinifera]             | 60.979 | 38.077 | 14.3 | 8 | 10 | 7 | 1.046 | 1.072 | 1.033 | 0.958 | 0.951 | 0.932 | 0.902 | 1.62E-03 |
| cds.Camellia_sinensis.comp4023_2_c0_seq1_m.33656   | methyltransferase type 11 [Medicago truncatula]                                              | 33.591 | 14.827 | 18   | 5 | 5  | 5 | 1     | 1.021 | 1.025 | 0.991 | 0.968 | 0.987 | 0.967 | 3.40E-02 |

|                                |                                                                                |        |        |      |   |    |   |       |       |       |       |       |       |       |          |
|--------------------------------|--------------------------------------------------------------------------------|--------|--------|------|---|----|---|-------|-------|-------|-------|-------|-------|-------|----------|
| cds.Camellia_sinensis.comp4030 | Tetratricopeptide repeat (TPR)-like superfamily protein [Arabidopsis thaliana] | 18.842 | -2     | 4.2  | 1 | 2  | 1 | 0.752 | 1.032 | 1.266 | 1.178 | 0.958 | 0.863 | 0.983 | 9.88E-01 |
| cds.Camellia_sinensis.comp4074 | PREDICTED: kxDL motif-containing protein 1-like [Juglans regia]                | 15.205 | 6.0489 | 9    | 1 | 1  | 1 | 0.946 | 0.876 | 1.056 | 1.028 | 1.084 | 1.037 | 1.094 | 1.77E-01 |
| cds.Camellia_sinensis.comp4082 | PREDICTED: thaumatin-like protein [Vitis vinifera]                             | 29.404 | 8.7214 | 9    | 2 | 2  | 2 | 1.067 | 1.067 | 1.015 | 0.971 | 0.933 | 0.939 | 0.903 | 7.92E-03 |
| cds.Camellia_sinensis.comp4127 | PREDICTED: omega-hydroxy palmitate O-feruloyl transferase [Vitis vinifera]     | 50.195 | 15.876 | 13.3 | 6 | 10 | 6 | 1.296 | 1.24  | 1.31  | 0.678 | 0.725 | 0.652 | 0.534 | 5.93E-05 |

|                                                   |                                                                                          |        |        |      |   |   |   |       |       |       |       |       |       |       |          |
|---------------------------------------------------|------------------------------------------------------------------------------------------|--------|--------|------|---|---|---|-------|-------|-------|-------|-------|-------|-------|----------|
| cds.Camellia_sinensis.comp4128_2_c0_seq1_m.25530  | PREDICTED:<br>probable acyl-activating enzyme 1, peroxisomal isoform X1 [Vitis vinifera] | 52.393 | 1.1559 | 1.9  | 1 | 1 | 1 | 0.945 | 0.963 | 0.951 | 1.076 | 1.082 | 1.011 | 1.108 | 1.03E-02 |
| cds.Camellia_sinensis.comp4132_4_c0_seq1_m.36863  | Acid phosphatase 1 [Morus notabilis]                                                     | 29.104 | 12.726 | 15.6 | 3 | 4 | 3 | 0.974 | 1.012 | 0.934 | 1.163 | 0.997 | 0.945 | 1.063 | 4.31E-01 |
| cds.Camellia_sinensis.comp4145_7_c0_seq1_m.43683  | PREDICTED:<br>germinlike protein 11-1 [Vitis vinifera]                                   | 26.058 | 6.9438 | 13.7 | 3 | 3 | 3 | 1.088 | 1.097 | 1.005 | 0.938 | 0.93  | 0.927 | 0.876 | 4.29E-02 |
| cds.Camellia_sinensis.comp4145_83_c0_seq1_m.57860 | PREDICTED:<br>galactinol synthase 2-like [Citrus sinensis]                               | 13.069 | 4.5376 | 19.8 | 2 | 3 | 2 | 0.952 | 0.929 | 0.777 | 1.122 | 1.075 | 1.181 | 1.271 | 2.50E-02 |
| cds.Camellia_sinensis.comp4209_2_c0_seq1_m.36103  | transmembrane protein [Arabidopsis thaliana]                                             | 33.844 | 6.4069 | 9.5  | 3 | 4 | 3 | 0.915 | 1.086 | 0.981 | 1.051 | 1.023 | 0.966 | 1.019 | 7.23E-01 |

|                                |                                                                                                         |        |        |      |   |   |   |       |       |       |       |       |       |       |          |
|--------------------------------|---------------------------------------------------------------------------------------------------------|--------|--------|------|---|---|---|-------|-------|-------|-------|-------|-------|-------|----------|
| cds.Camellia_sinensis.comp4213 | PREDICT<br>ED:<br>subtilisin-like protease SBT1.7<br>[Vitis vinifera]                                   | 11.108 | 2.5143 | 16.3 | 2 | 3 | 2 | 0.892 | 0.951 | 0.96  | 1.028 | 1.11  | 1.093 | 1.153 | 1.25E-02 |
| cds.Camellia_sinensis.comp4248 | PREDICT<br>ED:<br>calponin domain-containing protein<br>DDB_G0272472 isoform X2<br>[Populus euphratica] | 28.725 | 6.6258 | 16.6 | 4 | 4 | 3 |       |       |       |       |       |       |       |          |
| cds.Camellia_sinensis.comp4249 | transmembrane protein, putative<br>[Medicago truncatula]                                                | 37.405 | 4.2894 | 7.6  | 3 | 5 | 3 | 1.014 | 1.002 | 0.989 | 1.034 | 1.009 | 0.963 | 1     | 9.98E-01 |
| cds.Camellia_sinensis.comp4284 | PREDICT<br>ED:<br>protein<br>RETICULATA-RELATED 1,<br>chloroplast-like<br>[Nicotiana tabacum]           | 21.168 | 21.174 | 17.5 | 3 | 4 | 3 | 0.954 | 1.01  | 1.015 | 0.991 | 0.969 | 1.046 | 1.009 | 7.83E-01 |







|                                                  |                                                                                        |        |        |      |   |   |   |       |       |       |       |       |       |       |          |
|--------------------------------------------------|----------------------------------------------------------------------------------------|--------|--------|------|---|---|---|-------|-------|-------|-------|-------|-------|-------|----------|
| cds.Camellia_sinensis.comp4537_2_c0_seq1_m.42279 | PREDICT<br>ED: CCG-binding protein 1 [Juglans regia]                                   | 24.55  | 2.6584 | 10.2 | 2 | 2 | 2 | 0.865 | 0.993 | 0.944 | 1.041 | 1.047 | 1.145 | 1.154 | 4.72E-02 |
| cds.Camellia_sinensis.comp4543_c0_seq1_m.35900   | PREDICT<br>ED: ricin-like [Elaeis guineensis]                                          | 36.078 | 50.212 | 6.5  | 2 | 4 | 2 | 0.848 | 0.856 | 0.848 | 1.113 | 1.174 | 1.204 | 1.368 | 5.54E-03 |
| cds.Camellia_sinensis.comp4568_6_c0_seq1_m.44193 | PREDICT<br>ED: homeobox protein BEL1 homolog [Juglans regia]                           | 22.13  | 1.7117 | 5.3  | 1 | 1 | 1 | 1.095 | 1     | 1.01  | 0.937 | 0.954 | 0.993 | 0.929 | 9.37E-02 |
| cds.Camellia_sinensis.comp4594_3_c0_seq1_m.50866 | PREDICT<br>ED: endo-1,3;1,4-beta-D-glucanase-like [Juglans regia]                      | 19.354 | 28.42  | 22.7 | 4 | 4 | 4 | 1.014 | 0.948 | 1.1   | 0.973 | 0.967 | 0.998 | 0.96  | 4.20E-01 |
| cds.Camellia_sinensis.comp4610_7_c0_seq1_m.13891 | PREDICT<br>ED: putative BPI/LBP family protein At1g04970 isoform X1 [Nelumbo nucifera] | 53.95  | 40.69  | 13.5 | 6 | 7 | 6 | 1.071 | 1.02  | 1.033 | 0.949 | 0.937 | 0.963 | 0.912 | 5.20E-03 |

|                                                  |                                                                                                                             |        |      |    |    |    |       |       |       |       |       |       |       |          |  |
|--------------------------------------------------|-----------------------------------------------------------------------------------------------------------------------------|--------|------|----|----|----|-------|-------|-------|-------|-------|-------|-------|----------|--|
| cds.Camellia_sinensis.comp4612_5_c0_seq1_m.54741 | 11.837                                                                                                                      | -2     | 7.5  | 1  | 1  | 1  |       |       |       |       |       |       |       |          |  |
|                                                  | PREDICTED:                                                                                                                  |        |      |    |    |    |       |       |       |       |       |       |       |          |  |
| cds.Camellia_sinensis.comp4672_3_c0_seq1_m.58684 | 11.241                                                                                                                      | -2     | 18.1 | 2  | 3  | 1  | 0.937 | 0.935 | 0.986 | 1.044 | 1.021 | 1.102 | 1.108 | 2.30E-02 |  |
|                                                  | plasma membrane Ca <sup>2+</sup> -ATPase isoform X1 [Glycine max] alpha/beta hydrolase family protein [Medicago truncatula] |        |      |    |    |    |       |       |       |       |       |       |       |          |  |
| cds.Camellia_sinensis.comp4715_2_c0_seq1_m.29533 | 40.689                                                                                                                      | 52.657 | 35.6 | 10 | 15 | 10 | 1.017 | 1.04  | 1.013 | 0.967 | 0.957 | 0.977 | 0.945 | 5.04E-03 |  |
|                                                  | PREDICTED:                                                                                                                  |        |      |    |    |    |       |       |       |       |       |       |       |          |  |
| cds.Camellia_sinensis.comp4752_0_c0_seq1_m.36626 | 39.465                                                                                                                      | 3.6348 | 4    | 1  | 1  | 1  | 1.137 | 1.074 | 1.18  | 1.099 | 0.677 | 0.812 | 0.763 | 1.14E-01 |  |
|                                                  | probable sarcosine oxidase [Vitis vinifera]                                                                                 |        |      |    |    |    |       |       |       |       |       |       |       |          |  |
| cds.Camellia_sinensis.comp4755_1_c0_seq1_m.50882 | 14.053                                                                                                                      | 7.1958 | 19.2 | 3  | 4  | 3  | 1.016 | 0.969 | 1.031 | 0.96  | 1.028 | 0.996 | 0.989 | 7.14E-01 |  |

|                                |                    |                                                                                         |        |        |      |   |    |   |       |       |       |       |       |       |       |          |
|--------------------------------|--------------------|-----------------------------------------------------------------------------------------|--------|--------|------|---|----|---|-------|-------|-------|-------|-------|-------|-------|----------|
| cds.Camellia_sinensis.comp4755 | 7_c0_seq1_m.46952  | PREDICT ED:<br>phosphoenolpyruvate carboxylase<br>[Capsicum annuum]                     | 16.262 | -2     | 30.3 | 4 | 6  | 0 |       |       |       |       |       |       |       |          |
| cds.Camellia_sinensis.comp4838 | 4_c0_seq1_m.47721  | PREDICT ED:<br>acetylornithine aminotransferase, mitochondrial<br>[Populus euphratica]  | 15.282 | 9.8073 | 12.8 | 2 | 3  | 2 | 1.058 | 1.079 | 0.991 | 0.919 | 0.979 | 0.928 | 0.903 | 3.52E-02 |
| cds.Camellia_sinensis.comp4839 | 2_c0_seq1_m.51039  | PREDICT ED:<br>gibberellin-regulated protein 1-like isoform X2<br>[Nicotiana glauca]    | 12.635 | 3.2003 | 18.1 | 2 | 3  | 2 | 1.053 | 1.023 | 1.001 | 1.062 | 0.983 | 0.993 | 0.987 | 6.67E-01 |
| cds.Camellia_sinensis.comp4926 | 84_c0_seq1_m.58839 | PREDICT ED:<br>translationally-controlled tumor protein homolog<br>[Gossypium hirsutum] | 11.776 | 11.42  | 38.5 | 6 | 16 | 3 | 1.012 | 0.95  | 1.018 | 0.997 | 1.03  | 1.001 | 1.016 | 5.39E-01 |





|                                                  |                                                                           |        |        |      |   |    |   |       |       |       |       |       |       |       |          |
|--------------------------------------------------|---------------------------------------------------------------------------|--------|--------|------|---|----|---|-------|-------|-------|-------|-------|-------|-------|----------|
| cds.Camellia_sinensis.comp5792_4_c0_seq1_m.44234 | Aldolase-type TIM barrel family protein [Arabidopsis thaliana]            | 22.123 | 120.89 | 36.9 | 6 | 13 | 6 | 0.935 | 0.984 | 0.968 | 1.008 | 1.065 | 1.08  | 1.092 | 2.74E-02 |
| cds.Camellia_sinensis.comp5900_3_c0_seq1_m.33995 | PROTEASIN<br>protein SCO1 homolog 2, mitochondrial isoform X2             | 31.166 | 1.7285 | 5.8  | 2 | 2  | 2 | 1.011 | 1.045 | 1.013 | 0.986 | 1     | 0.949 | 0.956 | 7.75E-02 |
| cds.Camellia_sinensis.comp5916_9_c0_seq1_m.58685 | PROTEASIN<br>cysteine-rich secretory protein 60-like [Populus euphratica] | 10.862 | 3.2851 | 13.3 | 1 | 1  | 1 | 0.915 | 0.945 | 0.92  | 1.034 | 1.094 | 1.123 | 1.169 | 4.06E-03 |
| cds.Camellia_sinensis.comp6175_c0_seq1_m.49015   | PROTEASIN<br>ASPARTIC ACID AMINASE IN GUARD CELL 2 [Citrus sinensis]      | 19.549 | 5.8724 | 14   | 2 | 3  | 2 | 1.061 | 1.041 | 1.059 | 1.077 | 0.949 | 0.86  | 0.913 | 2.83E-01 |





|                                                  |                                                                                                                                         |        |        |     |   |   |   |       |       |       |       |       |       |       |          |
|--------------------------------------------------|-----------------------------------------------------------------------------------------------------------------------------------------|--------|--------|-----|---|---|---|-------|-------|-------|-------|-------|-------|-------|----------|
| cds.Camellia_sinensis.comp6718_1_c0_seq1_m.57359 | PREDICT<br>ED: zeatin O-xylosyltransferase-like<br>[Nicotiana attenuata]                                                                | 11.895 | 12.544 | 8.2 | 1 | 1 | 1 | 1.09  | 1.072 | 1.005 | 0.952 | 0.947 | 0.921 | 0.89  | 1.25E-02 |
| cds.Camellia_sinensis.comp6729_5_c0_seq1_m.36148 | PREDICT<br>ED: peroxisomal 2,4-dienoyl-CoA reductase<br>[Vitis vinifera]                                                                | 33.097 | 1.2639 | 2.6 | 1 | 1 | 1 | 0.949 | 0.995 | 0.957 | 1.018 | 1.041 | 1.06  | 1.075 | 1.78E-02 |
| cds.Camellia_sinensis.comp6968_1_c0_seq1_m.38233 | PREDICT<br>ED: vestitone reductase-like<br>[Vitis vinifera]                                                                             | 37.026 | 3.26   | 8.7 | 3 | 3 | 3 | 0.884 | 0.869 | 0.893 | 1.15  | 1.176 | 1.082 | 1.288 | 6.41E-04 |
| cds.Camellia_sinensis.comp7043_c0_seq1_m.43597   | PREDICT<br>ED: probable bifunctional methylthioribulose-1-phosphate dehydratase/enolase-phosphatase E1 2 isoform X1<br>[Vitis vinifera] | 19.226 | 1.5844 | 4.1 | 1 | 3 | 1 | 0.96  | 0.909 | 0.979 | 1.021 | 1.045 | 1.068 | 1.1   | 2.02E-02 |





|                                                  |                                                                                          |        |        |      |   |   |   |       |       |       |       |       |       |       |          |
|--------------------------------------------------|------------------------------------------------------------------------------------------|--------|--------|------|---|---|---|-------|-------|-------|-------|-------|-------|-------|----------|
| cds.Camellia_sinensis.comp7457_c0_seq1_m.29704   | PREDICT<br>ED:<br>glucan endo-1,3-beta-glucosidase 5<br>[Sesamum]                        | 48.901 | 3.5188 | 4.6  | 2 | 2 | 1 |       |       |       |       |       |       |       |          |
| cds.Camellia_sinensis.comp7459_c0_seq1_m.59126   | PREDICT<br>ED:<br>protein transport protein SEC23-like<br>[Nicotiana tabacum]            | 10.585 | 34.392 | 27.5 | 3 | 4 | 3 | 0.957 | 0.956 | 0.923 | 1.195 | 1.005 | 1     | 1.128 | 1.21E-01 |
| cds.Camellia_sinensis.comp7469_8_c0_seq1_m.45845 | PREDICT<br>ED:<br>cysteine-rich repeat secretory protein 55-like<br>[Gossypium hirsutum] | 26.69  | 7.2489 | 12.1 | 2 | 2 | 2 | 1.047 | 1.295 | 1.01  | 0.964 | 0.734 | 0.925 | 0.783 | 9.90E-02 |
| cds.Camellia_sinensis.comp7481_c0_seq1_m.25260   | PREDICT<br>ED:<br>protein disulfide-isomerase<br>[Nelumbo nucifera]                      | 48.994 | 1.2802 | 4.1  | 3 | 4 | 1 | 1.015 | 0.926 | 0.952 | 0.888 | 1.169 | 1.06  | 1.077 | 4.62E-01 |

|                             |                                                         |        |        |      |   |   |   |       |       |       |       |       |       |       |          |
|-----------------------------|---------------------------------------------------------|--------|--------|------|---|---|---|-------|-------|-------|-------|-------|-------|-------|----------|
|                             | PREDICT                                                 |        |        |      |   |   |   |       |       |       |       |       |       |       |          |
| cds.Camellia_sinensis       | ED: ferrochelate-2, chloroplast [Vitis vinifera]        |        |        |      |   |   |   |       |       |       |       |       |       |       |          |
| .comp7486_c0_seq1_m.13209   |                                                         | 57.912 | 13.033 | 7.5  | 4 | 6 | 4 | 1.054 | 1.074 | 0.994 | 0.927 | 0.945 | 0.942 | 0.901 | 1.27E-02 |
|                             | PREDICT                                                 |        |        |      |   |   |   |       |       |       |       |       |       |       |          |
| cds.Camellia_sinensis       | ED: probable acyl-activating enzyme 2 [Juglans regia]   |        |        |      |   |   |   |       |       |       |       |       |       |       |          |
| .comp7492_5_c0_seq1_m.19313 |                                                         | 65.575 | 12.883 | 8.1  | 4 | 5 | 4 | 0.981 | 1.04  | 0.985 | 1.071 | 0.927 | 1.014 | 1.002 | 9.90E-01 |
|                             | PREDICT                                                 |        |        |      |   |   |   |       |       |       |       |       |       |       |          |
| cds.Camellia_sinensis       | ED: phospholipase D alpha 1-like [Juglans regia]        |        |        |      |   |   |   |       |       |       |       |       |       |       |          |
| .comp7507_c0_seq1_m.52448   |                                                         | 18.715 | 14.699 | 19.5 | 3 | 4 | 2 | 0.947 | 0.884 | 0.954 | 1.045 | 1.095 | 1.105 | 1.165 | 6.80E-03 |
|                             | PREDICT                                                 |        |        |      |   |   |   |       |       |       |       |       |       |       |          |
| cds.Camellia_sinensis       | ED: acylphosphatase-like isoform X1 [Nicotiana tabacum] |        |        |      |   |   |   |       |       |       |       |       |       |       |          |
| .comp7540_c0_seq1_m.42081   |                                                         | 25.436 | 6.4602 | 8.8  | 2 | 4 | 2 | 0.926 | 0.967 | 0.951 | 1.035 | 1.038 | 1.047 | 1.097 | 2.08E-03 |
|                             | PREDICT                                                 |        |        |      |   |   |   |       |       |       |       |       |       |       |          |
| cds.Camellia_sinensis       | ED: calcineurin subunit B-like [Nicotiana tabacum]      |        |        |      |   |   |   |       |       |       |       |       |       |       |          |
| .comp7544_c0_seq2_m.47755   |                                                         | 21.778 | 6.1985 | 9.8  | 2 | 3 | 1 | 0.918 | 0.949 | 0.873 | 1.094 | 1.142 | 1.062 | 1.204 | 4.48E-03 |



|                                                |                                                              |        |        |      |    |    |    |       |       |       |       |       |       |       |          |
|------------------------------------------------|--------------------------------------------------------------|--------|--------|------|----|----|----|-------|-------|-------|-------|-------|-------|-------|----------|
| cds.Camellia_sinensis.comp7790_c0_seq1_m.36728 | embryo-abundant family protein [Populus trichocarpa]         | 30.556 | 89.831 | 42.2 | 11 | 21 | 11 | 1.032 | 0.959 | 0.985 | 0.971 | 1.06  | 0.996 | 1.017 | 6.45E-01 |
|                                                | PREDICTED:                                                   |        |        |      |    |    |    |       |       |       |       |       |       |       |          |
| cds.Camellia_sinensis.comp7843_c0_seq1_m.37966 | isoleucine-tRNA ligase, cytoplasmic-like [Nicotiana tabacum] | 23.995 | 2.5024 | 9.7  | 1  | 2  | 1  |       |       |       |       |       |       |       |          |
|                                                | PREDICTED:                                                   |        |        |      |    |    |    |       |       |       |       |       |       |       |          |
| cds.Camellia_sinensis.comp7873_c0_seq1_m.33440 | exosome complex component RRP42 [Ziziphus jujuba]            | 29.914 | 3.5615 | 9.1  | 2  | 2  | 2  |       |       |       |       |       |       |       |          |
|                                                | PREDICTED:                                                   |        |        |      |    |    |    |       |       |       |       |       |       |       |          |
| cds.Camellia_sinensis.comp7911_c0_seq1_m.48286 | HVA22-like protein f [Daucus carota subsp. sativus]          | 18.385 | 10.847 | 18.8 | 3  | 3  | 3  | 0.943 | 0.935 | 0.947 | 1.089 | 1.064 | 1.035 | 1.128 | 1.36E-03 |
| cds.Camellia_sinensis.comp7916_c0_seq2_m.4146  | LETM1-like protein [Medicago truncatula]                     | 103.16 | 3.8131 | 2.2  | 2  | 2  | 2  | 0.992 | 1.1   | 1.041 | 0.962 | 0.918 | 0.985 | 0.914 | 7.05E-02 |

|                                                |                                                                                   |        |        |      |   |   |   |       |       |       |       |       |       |       |          |
|------------------------------------------------|-----------------------------------------------------------------------------------|--------|--------|------|---|---|---|-------|-------|-------|-------|-------|-------|-------|----------|
| cds.Camellia_sinensis.comp7948_c0_seq1_m.50183 | PREDICT<br>ED:<br>protein SPA, chloroplast ic isoform X1 [Citrus sinensis]        | 12.787 | 5.1659 | 12.3 | 1 | 2 | 1 | 1.006 | 1.028 | 1.063 | 1.03  | 0.898 | 0.98  | 0.939 | 2.11E-01 |
| cds.Camellia_sinensis.comp7974_c0_seq1_m.52825 | PREDICT<br>ED:<br>coatomer subunit zeta-1-like [Juglans regia]                    | 18.477 | 9.455  | 14.5 | 3 | 6 | 3 | 1.053 | 1.014 | 0.983 | 0.992 | 1.023 | 0.937 | 0.968 | 3.69E-01 |
| cds.Camellia_sinensis.comp7976_c0_seq1_m.40429 | PREDICT<br>ED:<br>thioredoxin M3, chloroplast ic-like [Ipomoea nil]               | 19.762 | 39.591 | 28.8 | 4 | 5 | 4 | 0.98  | 1.046 | 1.011 | 1.005 | 0.998 | 0.97  | 0.979 | 3.87E-01 |
| cds.Camellia_sinensis.comp7984_c0_seq1_m.25603 | PREDICT<br>ED:<br>maspardin [Theobroma cacao]                                     | 46.59  | 1.7325 | 2.9  | 1 | 1 | 1 |       |       |       |       |       |       |       |          |
| cds.Camellia_sinensis.comp8031_c0_seq1_m.49811 | PREDICT<br>ED:<br>alcohol dehydrogenase class-3-like isoform X2 [Capsicum annuum] | 13.113 | 2.2441 | 18.5 | 2 | 2 | 2 | 1.036 | 0.965 | 1.075 | 0.927 | 0.999 | 0.996 | 0.95  | 2.72E-01 |



|                                                  |                                                                                                                                   |        |      |    |    |    |       |       |       |       |       |       |       |          |  |
|--------------------------------------------------|-----------------------------------------------------------------------------------------------------------------------------------|--------|------|----|----|----|-------|-------|-------|-------|-------|-------|-------|----------|--|
| cds.Camellia_sinensis.comp8059_c0_seq1_m.38917   | 19.822                                                                                                                            | 1.7826 | 6.5  | 1  | 1  | 1  |       |       |       |       |       |       |       |          |  |
|                                                  | PREDICTED:                                                                                                                        |        |      |    |    |    |       |       |       |       |       |       |       |          |  |
| cds.Camellia_sinensis.comp8060_c0_seq2_m.27832   | 42.626                                                                                                                            | 44.229 | 27.2 | 10 | 15 | 10 | 1.025 | 1.004 | 0.981 | 0.995 | 0.99  | 1.004 | 0.993 | 6.34E-01 |  |
|                                                  | ferredoxin-NADP reductase, root isozyme, chloroplastic [Cicer arietinum] PREDICTED:                                               |        |      |    |    |    |       |       |       |       |       |       |       |          |  |
| cds.Camellia_sinensis.comp8068_4_c0_seq1_m.42619 | 31.406                                                                                                                            | 4.6848 | 10.5 | 2  | 2  | 2  | 0.9   | 0.998 | 0.839 | 1.094 | 1.016 | 1.187 | 1.205 | 5.06E-02 |  |
|                                                  | bifunctional epoxide hydrolase 2-like [Erythraea guttata] transferrin glycosyl group transferase [Medicago truncatula] PREDICTED: |        |      |    |    |    |       |       |       |       |       |       |       |          |  |
| cds.Camellia_sinensis.comp8070_7_c0_seq1_m.24397 | 53.175                                                                                                                            | 1.1743 | 1.9  | 1  | 1  | 1  | 1.024 | 1.069 | 1.004 | 0.985 | 0.963 | 0.955 | 0.937 | 3.58E-02 |  |
|                                                  | phosphomannomutase/phosphoglucomutase isoform X2 [Ziziphus jujuba]                                                                |        |      |    |    |    |       |       |       |       |       |       |       |          |  |
| cds.Camellia_sinensis.comp8085_8_c0_seq1_m.39939 | 34.189                                                                                                                            | 37.016 | 19   | 6  | 7  | 6  | 1.017 | 1.052 | 1.057 | 0.973 | 0.925 | 0.969 | 0.917 | 1.29E-02 |  |

|                                                  |                                                                             |        |        |      |   |   |   |       |       |       |       |       |       |       |          |  |
|--------------------------------------------------|-----------------------------------------------------------------------------|--------|--------|------|---|---|---|-------|-------|-------|-------|-------|-------|-------|----------|--|
| cds.Camellia_sinensis.comp8105_c0_seq1_m.8660    | PREDICT                                                                     | 26.139 | 2.1693 | 4.3  | 1 | 1 | 1 |       |       |       |       |       |       |       |          |  |
|                                                  | ED:<br>copper amine oxidase 1-like isoform X2<br>[Populus euphratica]       |        |        |      |   |   |   |       |       |       |       |       |       |       |          |  |
| cds.Camellia_sinensis.comp8131_2_c0_seq1_m.23202 | PREDICT                                                                     | 51.099 | 2.1335 | 2.8  | 1 | 1 | 1 | 0.957 | 1.379 | 0.937 | 1.033 | 0.837 | 0.851 | 0.831 | 2.91E-01 |  |
|                                                  | ED:<br>aspartic proteinase Asp1 isoform X3<br>[Fragaria vesca subsp. vesca] |        |        |      |   |   |   |       |       |       |       |       |       |       |          |  |
| cds.Camellia_sinensis.comp8184_6_c0_seq1_m.59305 | PREDICT                                                                     | 11.322 | 11.57  | 27.7 | 2 | 2 | 2 | 0.954 | 0.967 | 0.995 | 1.119 | 0.954 | 1.036 | 1.066 | 2.63E-01 |  |
|                                                  | ED:<br>pectinesterase 2.2-like<br>[Juglans regia]                           |        |        |      |   |   |   |       |       |       |       |       |       |       |          |  |

|                                                |                                                                                                                                                            |        |        |      |   |    |   |       |       |       |       |       |       |       |          |
|------------------------------------------------|------------------------------------------------------------------------------------------------------------------------------------------------------------|--------|--------|------|---|----|---|-------|-------|-------|-------|-------|-------|-------|----------|
| cds.Camellia_sinensis.comp8216_c0_seq1_m.31089 | PREDICT<br>ED: biotin<br>carboxyl<br>carrier<br>protein of<br>acetyl-<br>CoA<br>carboxylas<br>e,<br>chloroplast<br>ic-like<br>[Gossypiu<br>m<br>raimondii] | 29.807 | 7.1227 | 13.1 | 4 | 10 | 4 | 1.037 | 1.057 | 1.008 | 0.986 | 0.974 | 1.005 | 0.956 | 5.27E-02 |
| cds.Camellia_sinensis.comp8275_c0_seq1_m.49996 | PREDICT<br>ED:<br>protein<br>lava lamp<br>isoform<br>X5 [Vitis<br>vinifera]                                                                                | 21.74  | 2.7562 | 11   | 2 | 2  | 2 | 1.087 | 1.008 | 1.098 | 1.018 | 0.854 | 0.926 | 0.876 | 8.03E-02 |
| cds.Camellia_sinensis.comp8320_c0_seq1_m.49805 | PREDICT<br>ED: SPX<br>domain-<br>containing<br>protein 1-<br>like<br>[Jatropha<br>curcas]                                                                  | 22.306 | 1.203  | 7.3  | 1 | 1  | 1 |       |       |       |       |       |       |       |          |
| cds.Camellia_sinensis.comp8340_c0_seq1_m.48112 | PREDICT<br>ED:<br>mitochond<br>rial<br>phosphate<br>carrier<br>protein 3,<br>mitochond<br>rial [Vitis<br>vinifera]                                         | 14.185 | 7.2687 | 16.5 | 2 | 4  | 1 | 0.982 | 0.899 | 0.882 | 0.979 | 1.09  | 1.188 | 1.179 | 6.68E-02 |

|                                                  |                                                                                       |        |        |      |   |    |   |       |       |       |       |       |       |       |          |
|--------------------------------------------------|---------------------------------------------------------------------------------------|--------|--------|------|---|----|---|-------|-------|-------|-------|-------|-------|-------|----------|
| cds.Camellia_sinensis.comp8370_c0_seq1_m.39819   | PREDICT<br>ED:<br>probable<br>glutathione<br>S-<br>transferase<br>[Vitis<br>vinifera] | 26.244 | 45.45  | 39.2 | 8 | 13 | 8 | 0.918 | 0.892 | 0.888 | 1.128 | 1.139 | 1.046 | 1.228 | 2.08E-03 |
| cds.Camellia_sinensis.comp8436_c0_seq1_m.50373   | PREDICT<br>ED: pectin<br>acetylsterase 10<br>[Nelumbo<br>nucifera]<br>glyoxalase/     | 20.935 | 6.1345 | 6.4  | 1 | 1  | 1 | 1     | 1.156 | 1.139 | 0.951 | 0.847 | 0.897 | 0.818 | 2.46E-02 |
| cds.Camellia_sinensis.comp8468_c0_seq1_m.37024   | bleomycin<br>resistance<br>protein/dioxygenase<br>[Medicago<br>truncatula]            | 22.623 | 15.368 | 22.7 | 4 | 6  | 4 | 1.039 | 1.063 | 1.022 | 0.952 | 0.953 | 0.988 | 0.926 | 1.00E-02 |
| cds.Camellia_sinensis.comp8505_c0_seq1_m.28563   | PREDICT<br>ED:<br>putative<br>invertase<br>inhibitor<br>[Ziziphus<br>jujuba]          | 21.54  | 2.1267 | 5.1  | 1 | 1  | 1 | 0.984 | 1.102 | 1.233 | 0.884 | 0.953 | 0.834 | 0.805 | 4.72E-02 |
| cds.Camellia_sinensis.comp8525_0_c0_seq1_m.59355 | phosphoenolpyruvate<br>carboxylase-like<br>[Malus<br>domestica]                       | 11.762 | -2     | 24   | 3 | 4  | 1 | 0.848 | 0.975 | 0.967 | 1.14  | 1.114 | 1.004 | 1.168 | 5.98E-02 |
| cds.Camellia_sinensis.comp8548_c0_seq1_m.30661   | Protein<br>ApaG<br>[Morus<br>notabilis]                                               | 21.503 | 7.6426 | 10.5 | 2 | 2  | 2 | 0.902 | 1.09  | 1.057 | 1.056 | 1.009 | 0.908 | 0.975 | 7.63E-01 |

|                                                  |                                                              |        |        |      |   |   |   |       |       |       |       |       |       |       |          |
|--------------------------------------------------|--------------------------------------------------------------|--------|--------|------|---|---|---|-------|-------|-------|-------|-------|-------|-------|----------|
| cds.Camellia_sinensis.comp8553_6_c0_seq1_m.58933 | stress up-regulated Nod 19 protein [Medicago truncatula]     | 11.674 | 3.4634 | 10.7 | 1 | 1 | 1 |       |       |       |       |       |       |       |          |
| cds.Camellia_sinensis.comp8559_c0_seq1_m.31734   | transmembrane protein, putative [Medicago truncatula]        | 18.39  | 2.1378 | 9.6  | 1 | 1 | 1 | 0.978 | 0.945 | 0.932 | 1.193 | 0.937 | 1.044 | 1.112 | 2.29E-01 |
| cds.Camellia_sinensis.comp8571_c0_seq1_m.30552   | PREDICTED: protein MEMO1 [Vitis vinifera] 26S                | 32.687 | 4.0276 | 6.5  | 2 | 2 | 2 | 0.928 | 1.013 | 1.025 | 1.022 | 0.991 | 1.041 | 1.03  | 4.33E-01 |
| cds.Camellia_sinensis.comp8673_c0_seq1_m.10797   | proteasome non-ATPase regulatory subunit 5 [Morus notabilis] | 21.633 | 31.4   | 41.7 | 7 | 7 | 7 | 0.981 | 1.018 | 1.082 | 0.985 | 0.982 | 0.962 | 0.951 | 1.67E-01 |
| cds.Camellia_sinensis.comp8726_c0_seq1_m.43781   | PREDICTED: UPF0160 protein-like [Populus euphratica]         | 13.611 | 7.49   | 11.4 | 1 | 2 | 1 | 0.999 | 0.948 | 0.973 | 1.026 | 1.031 | 1.039 | 1.06  | 1.95E-02 |

|                                                |                                                                                         |        |        |      |   |    |   |       |       |       |       |       |       |       |          |
|------------------------------------------------|-----------------------------------------------------------------------------------------|--------|--------|------|---|----|---|-------|-------|-------|-------|-------|-------|-------|----------|
| cds.Camellia_sinensis.comp8740_c0_seq1_m.36201 | SMP-30/gluconolactonase/LRE-like region protein [Medicago truncatula] PREDICTED: 15 kDa | 39.718 | 4.3274 | 5.9  | 2 | 2  | 2 | 1.035 | 0.989 | 0.977 | 1.029 | 0.937 | 1.038 | 1.001 | 9.95E-01 |
| cds.Camellia_sinensis.comp8761_c0_seq1_m.42795 | selenoprotein-like isoform X2 [Juglans regia] PREDICTED:                                | 20.876 | 4.5007 | 9.8  | 2 | 2  | 2 | 1.008 | 1.043 | 0.934 | 1.092 | 0.936 | 0.998 | 1.014 | 8.30E-01 |
| cds.Camellia_sinensis.comp8839_c0_seq1_m.30938 | mitochondrial outer membrane protein porin 4 [Juglans regia] latex                      | 29.662 | 46.409 | 31.9 | 9 | 15 | 8 | 1.08  | 1.023 | 1.033 | 0.939 | 0.953 | 1.001 | 0.923 | 3.41E-02 |
| cds.Camellia_sinensis.comp8848_c0_seq1_m.38628 | abundant protein 1 [Populus trichocarpa]                                                | 25.275 | 3.9751 | 5.8  | 1 | 2  | 1 | 1.073 | 0.956 | 0.938 | 1.011 | 0.92  | 1.102 | 1.022 | 7.69E-01 |
| cds.Camellia_sinensis.comp8891_c1_seq1_m.56602 | tropinone reductase homolog At5g06060-like [Ananas comosus]                             | 13.052 | 15.253 | 23   | 3 | 8  | 2 | 0.994 | 0.953 | 0.98  | 1.008 | 0.994 | 1.037 | 1.038 | 9.93E-02 |

|                                                |                                                                                     |        |        |      |    |    |    |       |       |       |       |       |       |       |          |
|------------------------------------------------|-------------------------------------------------------------------------------------|--------|--------|------|----|----|----|-------|-------|-------|-------|-------|-------|-------|----------|
|                                                | PREDICT                                                                             |        |        |      |    |    |    |       |       |       |       |       |       |       |          |
|                                                | ED:                                                                                 |        |        |      |    |    |    |       |       |       |       |       |       |       |          |
| cds.Camellia_sinensis.comp8892_c0_seq1_m.2156  | kinesin-like protein KIN-14B [Vitis vinifera]                                       | 142.71 | 312.9  | 36.1 | 41 | 60 | 41 | 1.048 | 1.038 | 1.032 | 0.959 | 0.961 | 0.962 | 0.924 | 6.36E-05 |
|                                                | PREDICT                                                                             |        |        |      |    |    |    |       |       |       |       |       |       |       |          |
|                                                | ED:                                                                                 |        |        |      |    |    |    |       |       |       |       |       |       |       |          |
| cds.Camellia_sinensis.comp8914_c0_seq1_m.15133 | probable RNA-binding protein 46 isoform X3 [Vitis vinifera]                         | 62.649 | 67.809 | 25.8 | 13 | 15 | 13 | 0.993 | 0.964 | 0.977 | 1.025 | 1.002 | 1.028 | 1.041 | 2.66E-02 |
|                                                | PREDICT                                                                             |        |        |      |    |    |    |       |       |       |       |       |       |       |          |
|                                                | ED:                                                                                 |        |        |      |    |    |    |       |       |       |       |       |       |       |          |
| cds.Camellia_sinensis.comp8916_c0_seq1_m.36632 | putative 4-hydroxy-4-methyl-2-oxoglutarate aldolase 3 isoform X2 [Ricinus communis] | 17.69  | 21.263 | 30.1 | 5  | 6  | 4  | 0.98  | 1.023 | 0.971 | 1.05  | 1.014 | 1.021 | 1.037 | 1.29E-01 |
|                                                | PREDICT                                                                             |        |        |      |    |    |    |       |       |       |       |       |       |       |          |
|                                                | ED:                                                                                 |        |        |      |    |    |    |       |       |       |       |       |       |       |          |
| cds.Camellia_sinensis.comp8921_c0_seq1_m.29053 | inositol-tetrakisphosphate 1-kinase 1 [Vitis vinifera]                              | 35.903 | 14.876 | 14   | 4  | 5  | 4  | 1.09  | 1.037 | 1.02  | 0.946 | 1.01  | 0.897 | 0.907 | 6.74E-02 |





|                                                |                                                                                             |        |        |      |    |    |    |       |       |       |       |       |       |       |          |
|------------------------------------------------|---------------------------------------------------------------------------------------------|--------|--------|------|----|----|----|-------|-------|-------|-------|-------|-------|-------|----------|
| cds.Camellia_sinensis.comp9166_c0_seq1_m.26212 | PREDICT ED: protein SRG1 [Theobroma cacao]                                                  | 43.278 | 95.806 | 28.3 | 10 | 16 | 10 | 0.96  | 0.965 | 0.991 | 1.044 | 1.09  | 1.046 | 1.091 | 7.26E-03 |
| cds.Camellia_sinensis.comp9179_c0_seq1_m.26764 | PREDICT ED: protein DJ-1 homolog D [Musa acuminata subsp. malaccensis]                      | 43.787 | 59.101 | 16.7 | 6  | 17 | 6  | 0.925 | 0.947 | 0.939 | 1.084 | 1.036 | 1.055 | 1.129 | 1.20E-03 |
| cds.Camellia_sinensis.comp9186_c0_seq1_m.31693 | PREDICT ED: peroxisomal trans-2-enoyl-CoA reductase [Sesamum indicum]                       | 29.245 | 4.4668 | 3.8  | 1  | 2  | 1  | 0.896 | 1.47  | 0.922 | 0.901 | 0.882 | 0.918 | 0.821 | 4.02E-01 |
| cds.Camellia_sinensis.comp9249_c0_seq1_m.13569 | PREDICT ED: cysteine--tRNA ligase, chloroplast ic/mitochondrial isoform X2 [Vitis vinifera] | 53.618 | 7.5102 | 5.7  | 3  | 5  | 3  | 0.966 | 1.013 | 1.01  | 0.984 | 0.972 | 1.069 | 1.012 | 7.53E-01 |



|                                                |                                                                                                                     |        |        |      |   |    |   |       |       |       |       |       |       |       |          |
|------------------------------------------------|---------------------------------------------------------------------------------------------------------------------|--------|--------|------|---|----|---|-------|-------|-------|-------|-------|-------|-------|----------|
|                                                | PREDICT<br>ED:<br>protein<br>ABC17,<br>chloroplast<br>ic-like<br>isoform<br>X2<br>[Ipomoea<br>nil]                  |        |        |      |   |    |   |       |       |       |       |       |       |       |          |
| cds.Camellia_sinensis.comp9406_c0_seq1_m.55002 |                                                                                                                     | 14.823 | 13.542 | 24.1 | 3 | 6  | 3 | 1.076 | 1.043 | 0.992 | 0.94  | 0.96  | 1.009 | 0.935 | 1.02E-01 |
|                                                | PREDICT<br>ED:<br>calcium-<br>transportin<br>g ATPase<br>10, plasma<br>membrane<br>-type<br>[Erythra<br>he guttata] |        |        |      |   |    |   |       |       |       |       |       |       |       |          |
| cds.Camellia_sinensis.comp9428_c0_seq1_m.53920 |                                                                                                                     | 16.319 | -2     | 7.4  | 1 | 1  | 1 | 1.048 | 1.074 | 1.049 | 0.938 | 0.905 | 0.975 | 0.889 | 6.70E-03 |
|                                                | PREDICT<br>ED:<br>aldehyde<br>dehydroge<br>nase<br>family 7<br>member<br>A1<br>[Nelumbo<br>nucifera]                |        |        |      |   |    |   |       |       |       |       |       |       |       |          |
| cds.Camellia_sinensis.comp9438_c0_seq1_m.15474 |                                                                                                                     | 56.082 | 32.538 | 18.3 | 9 | 15 | 9 | 0.973 | 0.998 | 0.993 | 0.996 | 1.018 | 1.027 | 1.026 | 9.89E-02 |
|                                                | PREDICT<br>ED: dnaJ<br>homolog<br>1,<br>mitochond<br>rial-like<br>[Sesamum                                          |        |        |      |   |    |   |       |       |       |       |       |       |       |          |
| cds.Camellia_sinensis.comp9443_c0_seq1_m.43794 |                                                                                                                     | 19.311 | 4.4    | 28.7 | 6 | 14 | 1 | 1.034 | 1.032 | 1.065 | 0.91  | 0.948 | 1.003 | 0.914 | 3.88E-02 |

|                                                |                                                                                                     |        |        |      |    |    |    |       |       |       |       |       |       |       |          |
|------------------------------------------------|-----------------------------------------------------------------------------------------------------|--------|--------|------|----|----|----|-------|-------|-------|-------|-------|-------|-------|----------|
| cds.Camellia_sinensis.comp9451_c0_seq1_m.34591 | PREDICT<br>ED:<br>pyrroline-5-carboxylate reductase [Erythraea guttata]                             | 28.647 | 1.7665 | 9.7  | 3  | 3  | 3  | 0.963 | 1.054 | 0.98  | 1.036 | 0.986 | 0.996 | 1.007 | 8.23E-01 |
| cds.Camellia_sinensis.comp9469_c0_seq1_m.45143 | PREDICT<br>ED:<br>protein TIC 55, chloroplastic [Solanum tuberosum]                                 | 17.791 | 2.1189 | 5.8  | 1  | 1  | 1  | 0.968 | 1.126 | 1.06  | 0.906 | 1.004 | 0.935 | 0.902 | 1.29E-01 |
| cds.Camellia_sinensis.comp946_c0_seq1_m.50226  | PREDICT<br>ED:<br>carboxylesterase 1-like [Juglans regia]                                           | 20.971 | 2.2902 | 6.4  | 1  | 1  | 1  | 0.982 | 0.994 | 0.879 | 1.008 | 1.137 | 1.021 | 1.109 | 1.31E-01 |
| cds.Camellia_sinensis.comp9477_c0_seq1_m.27406 | PREDICT<br>ED:<br>phosphoribosylaminimidazole - succinocarboxamide synthase, chloroplastic [Ricinus | 45.922 | 33.978 | 27.1 | 10 | 13 | 10 | 0.991 | 0.974 | 1.005 | 0.957 | 1.033 | 1.012 | 1.011 | 6.97E-01 |





|                                                |                                                                       |        |        |      |   |   |   |       |       |       |       |       |       |       |          |
|------------------------------------------------|-----------------------------------------------------------------------|--------|--------|------|---|---|---|-------|-------|-------|-------|-------|-------|-------|----------|
| PREDICTED:                                     |                                                                       |        |        |      |   |   |   |       |       |       |       |       |       |       |          |
| cds.Camellia_sinensis.comp9690_c0_seq1_m.30320 | acetolactate synthase small subunit 2, chloroplastic [Vitis vinifera] | 35.374 | 14.053 | 15.2 | 5 | 6 | 5 | 0.93  | 0.971 | 0.909 | 1.093 | 1.052 | 1.076 | 1.146 | 3.58E-03 |
| PREDICTED:                                     |                                                                       |        |        |      |   |   |   |       |       |       |       |       |       |       |          |
| cds.Camellia_sinensis.comp9719_c0_seq1_m.15955 | translation initiation factor eIF-2B subunit gamma [Nelumbo nucifera] | 49.73  | 13.029 | 11   | 4 | 6 | 4 | 0.913 | 1.029 | 0.999 | 1.027 | 0.987 | 1.082 | 1.053 | 3.10E-01 |
| PREDICTED: acyl-                               |                                                                       |        |        |      |   |   |   |       |       |       |       |       |       |       |          |
| cds.Camellia_sinensis.comp9790_c0_seq1_m.23760 | CoA thioesterase 2-like isoform X1 [Nicotiana tabacum]                | 48.149 | 9.933  | 9.8  | 4 | 6 | 4 | 1.025 | 1.049 | 1.019 | 1.008 | 0.964 | 0.992 | 0.958 | 5.37E-02 |
| PREDICTED: serine                              |                                                                       |        |        |      |   |   |   |       |       |       |       |       |       |       |          |
| cds.Camellia_sinensis.comp9808_c0_seq2_m.22340 | carboxypeptidase-like 45 isoform X1 [Theobroma cacao]                 | 55.567 | 10.927 | 9.1  | 4 | 5 | 4 | 0.922 | 0.964 | 0.955 | 1.051 | 1.055 | 1.04  | 1.107 | 1.98E-03 |

|                                                  |                                                                                                                                                                                                                               |        |        |      |    |    |    |       |       |       |       |       |       |       |          |
|--------------------------------------------------|-------------------------------------------------------------------------------------------------------------------------------------------------------------------------------------------------------------------------------|--------|--------|------|----|----|----|-------|-------|-------|-------|-------|-------|-------|----------|
| cds.Camellia_sinensis.comp9835_c0_seq1_m.44238   | PREDICT<br>ED:<br>cytochrome P450<br>CYP72A219-like<br>[Nicotiana tabacum]<br>PREDICT<br>ED: MAR-binding<br>filament-like                                                                                                     | 29.72  | 8.2084 | 24.5 | 7  | 8  | 6  | 1.066 | 1.09  | 1.042 | 1.019 | 0.911 | 0.883 | 0.88  | 4.57E-02 |
| cds.Camellia_sinensis.comp9846_c0_seq1_m.9208    | protein 1-1 isoform X1<br>[Fragaria vesca subsp. vesca]<br>PREDICT<br>ED:<br>glycerophosphodiesterase<br>GDPD1,<br>chloroplastic [Vitis vinifera]<br>PREDICT<br>ED:<br>monothiol glutaredoxin-S17 isoform X1 [Vitis vinifera] | 66.879 | 60.388 | 32   | 18 | 20 | 18 | 1.057 | 1.066 | 1.078 | 0.9   | 0.938 | 0.927 | 0.864 | 4.18E-04 |
| cds.Camellia_sinensis.comp9852_9_c0_seq1_m.53511 | phosphodiesterase<br>GDPD1,<br>chloroplastic [Vitis vinifera]<br>PREDICT<br>ED:<br>monothiol glutaredoxin-S17 isoform X1 [Vitis vinifera]                                                                                     | 13.38  | 2.6605 | 8.1  | 1  | 1  | 1  | 1.015 | 1.2   | 1.033 | 0.908 | 0.901 | 0.93  | 0.843 | 3.60E-02 |
| cds.Camellia_sinensis.comp9879_c0_seq1_m.20633   | monothiol glutaredoxin-S17 isoform X1 [Vitis vinifera]                                                                                                                                                                        | 54.981 | 48.971 | 14.6 | 6  | 8  | 6  | 0.97  | 1.01  | 1.035 | 1.043 | 0.94  | 1.008 | 0.992 | 8.23E-01 |



|                                                |                                                                                        |        |        |      |    |    |   |       |       |       |       |       |       |       |          |  |
|------------------------------------------------|----------------------------------------------------------------------------------------|--------|--------|------|----|----|---|-------|-------|-------|-------|-------|-------|-------|----------|--|
| cds.Camellia_sinensis.comp9908_c0_seq1_m.26455 | PREDICT<br>ED:<br>probable polygalacturonase [Eucalyptus grandis]                      | 26.271 | 3.3251 | 12.3 | 2  | 2  | 2 |       |       |       |       |       |       |       |          |  |
| cds.Camellia_sinensis.comp9913_c0_seq1_m.57107 | PREDICT<br>ED: pre-mRNA-processing factor 19-like, partial [Nicotiana tomentosiformis] | 12.677 | 2.9441 | 12.8 | 1  | 1  | 1 |       |       |       |       |       |       |       |          |  |
| cds.Camellia_sinensis.comp9962_c0_seq1_m.50653 | PREDICT<br>ED: RNA-binding protein 1-like [Juglans regia]                              | 19.996 | 106.01 | 54.6 | 7  | 12 | 7 | 0.965 | 1.018 | 0.993 | 0.997 | 0.968 | 1.011 | 1     | 9.97E-01 |  |
| cds.Camellia_sinensis.comp9991_c0_seq1_m.48761 | PREDICT<br>ED: 60S acidic ribosomal protein P2B-like [Populus euphratica]              | 11.319 | 15.089 | 22.1 | 3  | 7  | 3 | 1.036 | 1.046 | 1.061 | 0.974 | 0.975 | 0.922 | 0.913 | 1.00E-02 |  |
| cds.Camellia_sinensis.comp9994_c0_seq1_m.38016 | PREDICT<br>ED:<br>adenylate kinase 4 [Oryza sativa Japonica Group]                     | 28.4   | 14.865 | 42.6 | 10 | 21 | 6 | 1.023 | 1.071 | 1.069 | 0.918 | 0.917 | 0.974 | 0.888 | 8.84E-03 |  |

---
