# Supplementary material for: Drought stress triggers proteomic changes involving lignin, flavonoids and fatty acids in tea plants
Source: PubMed Central journal article supplement (PMC7511325; doi:10.1038/s41598-020-72596-1), 2020-09-23
Supplement: 41598_2020_72596_MOESM3_ESM.pdf [file 41598_2020_72596_MOESM3_ESM.pdf]

**Drought Stress Triggers the Proteomic Changes Involved in Lignins, Flavonoids and Fatty Acids in Tea Plants**  
 Honglian Gu<sup>1</sup>, Yu Wang<sup>1</sup>, Hui Xie<sup>1</sup>, Chen Qiu<sup>1</sup>, Shuning Zhang<sup>1</sup>, Jun Xiao<sup>2</sup>, Hongyan Li<sup>3</sup>, Liang Chen<sup>4</sup>, Xinghui Li<sup>5</sup>, Zhaotang Ding<sup>1,\*</sup>  
<sup>1</sup> Tea Research Institute, Qingdao Agricultural University, Qingdao, Shandong266109, China.  
<sup>2</sup> School of Biological Science and Winery Engineering, Taishan University, Taian, Shandong271000, China.  
<sup>3</sup> Haiyang fruit technology promotion station, Yantai, Shandong265100, China.  
<sup>4</sup> Tea Research Institute, Chinese Academy of Agricultural Sciences, Hangzhou, Zhejiang310008, China.  
<sup>5</sup> Tea Research Institute, Nanjing Agricultural University, Nanjing, Jiangsu210095, China.

guhongliantea@163.com (H.G.); wangyutea@163.com (Y.W.); xiehuitea@163.com (H.X.); qiuchentea@163.com (C.Q.); zhangshuningtea@163.com (S.Z.); xiaojun8299@163.com (J.X.); sunmijia0710@163.com (H.L.); liangchen@tricaas.com (L.C.); lsh@njau.edu.cn (X.L.)

\*Correspondence: dzitea@163.com; Tel: +85-15853260396

**Supplementary Table S3. GO enrichment**

| GO Terms Level 1   | GO Terms ID | GO Terms Level | GO Terms Description                     | Fisher's exact test P value | Protein accession                                | Protein description                                                             | DT/CK Ratio | Regulated Type | DT/CK P value | MW [kDa] | Score  | Coverage [%] | Peptides | PSMs | Unique peptides | CK1   | CK2   | CK3   | DT1   | DT2   | DT3   |
|--------------------|-------------|----------------|------------------------------------------|-----------------------------|--------------------------------------------------|---------------------------------------------------------------------------------|-------------|----------------|---------------|----------|--------|--------------|----------|------|-----------------|-------|-------|-------|-------|-------|-------|
| Cellular Component | GO:0043231  | 7              | intracellular membrane-bounded organelle | 0.167839                    | cds.Camellia_sinensis_comp30452_c0_seq2_m.40812  | PREDICTE<br>D: methyl-CpG-binding domain-containing protein 11 [Vitis vinifera] | 0.588       | Down           | 0.000185      | 29.818   | 34.764 | 28.8         | 6        | 8    | 5               | 1.237 | 1.268 | 1.251 | 0.782 | 0.683 | 0.745 |
| Cellular Component | GO:0043231  | 7              | intracellular membrane-bounded organelle | 0.167839                    | cds.Camellia_sinensis_comp33599_c1_seq11_m.43079 | PREDICTE<br>D: histone H2AX [Citrus sinensis]                                   | 0.584       | Down           | 9.72E-05      | 14.658   | 6.2367 | 25           | 5        | 15   | 2               | 1.193 | 1.245 | 1.316 | 0.749 | 0.739 | 0.704 |
| Cellular Component | GO:0043231  | 7              | intracellular membrane-bounded organelle | 0.167839                    | cds.Camellia_sinensis_comp30452_c0_seq1_m.32345  | PREDICTE<br>D: methyl-CpG-binding domain-containing protein 11 [Vitis vinifera] | 0.654       | Down           | 0.000178      | 34.5     | 18.045 | 16.8         | 5        | 10   | 2               | 1.24  | 1.175 | 1.188 | 0.747 | 0.82  | 0.788 |
| Cellular Component | GO:0043231  | 7              | intracellular membrane-bounded organelle | 0.167839                    | cds.Camellia_sinensis_comp30146_c0_seq1_m.21634  | PREDICTE<br>D: nuclear pore complex protein NUP50A [Theobroma cacao]            | 0.612       | Down           | 0.000323      | 44.255   | 6.2386 | 12.8         | 4        | 4    | 4               | 1.311 | 1.197 | 1.167 | 0.75  | 0.718 | 0.78  |
| Cellular Component | GO:0043231  | 7              | intracellular membrane-bounded organelle | 0.167839                    | cds.Camellia_sinensis_comp30991_c1_seq6_m.41940  | PREDICTE<br>D: HMGB-Y-related protein A-like [Raphanus sativus]                 | 0.651       | Down           | 0.00018       | 19.574   | 49.648 | 32.3         | 6        | 14   | 1               | 1.251 | 1.197 | 1.148 | 0.771 | 0.811 | 0.758 |
| Cellular Component | GO:0043231  | 7              | intracellular membrane-bounded organelle | 0.167839                    | cds.Camellia_sinensis_comp19929_c0_seq1_m.31347  | PREDICTE<br>D: clathrin light chain 1-like [Capsicum annuum]                    | 0.595       | Down           | 1.87E-05      | 37.317   | 14.334 | 9.5          | 3        | 3    | 2               | 1.269 | 1.241 | 1.205 | 0.735 | 0.758 | 0.719 |
| Cellular Component | GO:0043228  | 3              | non-membrane-bounded organelle           | 0.005856                    | cds.Camellia_sinensis_comp28106_c0_seq1_m.46951  | PREDICTE<br>D: 60S ribosomal protein L21-1 [Daucus carota subsp. sativus]       | 0.659       | Down           | 2.54E-06      | 18.716   | 16.424 | 30.5         | 6        | 12   | 6               | 1.198 | 1.207 | 1.205 | 0.774 | 0.798 | 0.807 |
| Cellular Component | GO:0043228  | 3              | non-membrane-bounded organelle           | 0.005856                    | cds.Camellia_sinensis_comp33599_c1_seq11_m.43029 | PREDICTE<br>D: histone H2AX [Citrus sinensis]                                   | 0.584       | Down           | 9.72E-05      | 14.658   | 6.2367 | 25           | 5        | 15   | 2               | 1.193 | 1.245 | 1.316 | 0.749 | 0.739 | 0.704 |
| Cellular Component | GO:0043228  | 3              | non-membrane-bounded organelle           | 0.005856                    | cds.CL830ntig1_m.15259                           | PREDICTE<br>D: tubulin alpha chain [Ziziphus juliflora]                         | 0.663       | Down           | 0.0002        | 49.677   | 103.8  | 32           | 12       | 24   | 2               | 1.164 | 1.213 | 1.213 | 0.788 | 0.835 | 0.757 |
| Cellular Component | GO:0043228  | 3              | non-membrane-bounded organelle           | 0.005856                    | cds.Camellia_sinensis_comp30991_c1_seq6_m.41940  | PREDICTE<br>D: HMGB-Y-related protein A-like [Raphanus sativus]                 | 0.651       | Down           | 0.00018       | 19.574   | 49.648 | 32.3         | 6        | 14   | 1               | 1.251 | 1.197 | 1.148 | 0.771 | 0.811 | 0.758 |
| Cellular Component | GO:0043228  | 3              | non-membrane-bounded organelle           | 0.005856                    | cds.Camellia_sinensis_comp34663_c0_seq10_m.34729 | PREDICTE<br>D: 50S ribosomal protein L15, chloroplastic [Vitis vinifera]        | 0.649       | Down           | 4.2E-06       | 29.408   | 47.897 | 29.7         | 7        | 10   | 7               | 1.179 | 1.227 | 1.204 | 0.766 | 0.789 | 0.787 |
| Cellular Component | GO:0043228  | 3              | non-membrane-bounded organelle           | 0.005856                    | cds.Camellia_sinensis_comp11716_c0_seq1_m.37295  | PREDICTE<br>D: 40S ribosomal protein 57 [Nelumbo nucifera]                      | 0.639       | Down           | 1.55E-05      | 26.673   | 10.971 | 19.4         | 5        | 8    | 5               | 1.188 | 1.23  | 1.177 | 0.751 | 0.773 | 0.773 |
| Cellular Component | GO:0043228  | 3              | non-membrane-bounded organelle           | 0.005856                    | cds.Camellia_sinensis_comp24911_c0_seq1_m.38588  | PREDICTE<br>D: 40S ribosomal protein S11-like [Daucus carota subsp. sativus]    | 0.639       | Down           | 7.59E-08      | 17.858   | 12.377 | 35.2         | 7        | 8    | 7               | 1.215 | 1.197 | 1.197 | 0.766 | 0.767 | 0.774 |
| Cellular Component | GO:0043228  | 3              | non-membrane-bounded organelle           | 0.005856                    | cds.Camellia_sinensis_comp25442_c0_seq1_m.40798  | PREDICTE<br>D: 40S ribosomal protein S15 [Ricinus communis]                     | 0.649       | Down           | 0.00318       | 17.202   | 10.646 | 19.2         | 2        | 5    | 1               | 1.215 | 1.125 | 1.264 | 0.756 | 0.871 | 0.713 |
| Cellular Component | GO:0043229  | 6              | intracellular organelle                  | 0.01146                     | cds.Camellia_sinensis_comp30452_c0_seq2_m.40812  | PREDICTE<br>D: methyl-CpG-binding domain-containing protein 11 [Vitis vinifera] | 0.588       | Down           | 0.000185      | 29.818   | 34.764 | 28.8         | 6        | 8    | 5               | 1.237 | 1.268 | 1.251 | 0.782 | 0.683 | 0.745 |
| Cellular Component | GO:0043229  | 6              | intracellular organelle                  | 0.01146                     | cds.Camellia_sinensis_comp28106_c0_seq1_m.46951  | PREDICTE<br>D: 60S ribosomal protein L21-1 [Daucus carota subsp. sativus]       | 0.659       | Down           | 2.54E-06      | 18.716   | 16.424 | 30.5         | 6        | 12   | 6               | 1.198 | 1.207 | 1.205 | 0.774 | 0.798 | 0.807 |

|                    |            |   |                         |         |                                                                                                                                  |       |      |          |        |        |      |    |    |   |       |       |       |       |       |       |
|--------------------|------------|---|-------------------------|---------|----------------------------------------------------------------------------------------------------------------------------------|-------|------|----------|--------|--------|------|----|----|---|-------|-------|-------|-------|-------|-------|
| Cellular Component | GO:0043229 | 6 | intracellular organelle | 0.01146 | cds.Camellia_sinensis.comp335_99_c1_seq_11_m.43029<br>PREDICTED: histone H2AX [Citrus sinensis]                                  | 0.584 | Down | 9.72E-05 | 14.658 | 6.2367 | 25   | 5  | 15 | 2 | 1.193 | 1.245 | 1.316 | 0.749 | 0.739 | 0.704 |
| Cellular Component | GO:0043229 | 6 | intracellular organelle | 0.01146 | cds.CL83C.onlig1_m.15259<br>PREDICTED: tubulin alpha chain [Ziziphus jujubal]                                                    | 0.663 | Down | 0.0002   | 49.677 | 103.8  | 32   | 12 | 24 | 2 | 1.164 | 1.213 | 1.213 | 0.788 | 0.835 | 0.757 |
| Cellular Component | GO:0043229 | 6 | intracellular organelle | 0.01146 | cds.Camellia_sinensis.comp301_46_c0_seq_1_m.21634<br>PREDICTED: nuclear pore complex protein NUP50A [Theobroma cacao]            | 0.612 | Down | 0.000323 | 44.255 | 6.2386 | 12.8 | 4  | 4  | 4 | 1.311 | 1.197 | 1.167 | 0.75  | 0.718 | 0.78  |
| Cellular Component | GO:0043229 | 6 | intracellular organelle | 0.01146 | cds.Camellia_sinensis.comp309_91_c1_seq_6_m.41940<br>PREDICTED: HMG-Y-related protein A-like [Raphanus sativus]                  | 0.651 | Down | 0.00018  | 19.574 | 49.648 | 32.3 | 6  | 14 | 1 | 1.251 | 1.197 | 1.148 | 0.771 | 0.811 | 0.758 |
| Cellular Component | GO:0043229 | 6 | intracellular organelle | 0.01146 | cds.Camellia_sinensis.comp199_29_c0_seq_1_m.31347<br>PREDICTED: clathrin light chain 1-like [Capsicum annuum]                    | 0.595 | Down | 1.87E-05 | 37.317 | 14.334 | 9.5  | 3  | 3  | 2 | 1.269 | 1.241 | 1.205 | 0.735 | 0.758 | 0.719 |
| Cellular Component | GO:0043229 | 6 | intracellular organelle | 0.01146 | cds.Camellia_sinensis.comp346_63_c0_seq_10_m.34729<br>PREDICTED: 50S ribosomal protein L15, chloroplastic [Vitis vinifera]       | 0.649 | Down | 4.2E-06  | 29.408 | 47.897 | 29.7 | 7  | 10 | 7 | 1.179 | 1.227 | 1.204 | 0.766 | 0.789 | 0.787 |
| Cellular Component | GO:0043229 | 6 | intracellular organelle | 0.01146 | cds.Camellia_sinensis.comp304_52_c0_seq_1_m.32345<br>PREDICTED: methyl-CpG-binding domain-containing protein 11 [Vitis vinifera] | 0.654 | Down | 0.000178 | 34.5   | 18.045 | 16.8 | 5  | 10 | 2 | 1.24  | 1.175 | 1.188 | 0.747 | 0.82  | 0.788 |
| Cellular Component | GO:0043229 | 6 | intracellular organelle | 0.01146 | cds.Camellia_sinensis.comp117_16_c0_seq_1_m.37295<br>PREDICTED: 40S ribosomal protein S7 [Nelumbo nucifera]                      | 0.639 | Down | 1.55E-05 | 26.673 | 10.971 | 19.4 | 5  | 8  | 5 | 1.188 | 1.23  | 1.177 | 0.751 | 0.773 | 0.773 |
| Cellular Component | GO:0043229 | 6 | intracellular organelle | 0.01146 | cds.Camellia_sinensis.comp249_11_c0_seq_1_m.38588<br>PREDICTED: 40S ribosomal protein S11-like [Daucus carota subsp. caryophyll] | 0.639 | Down | 7.59E-08 | 17.858 | 12.377 | 35.2 | 7  | 8  | 7 | 1.2   | 1.215 | 1.197 | 0.766 | 0.767 | 0.774 |
| Cellular Component | GO:0043229 | 6 | intracellular organelle | 0.01146 | cds.Camellia_sinensis.comp254_42_c0_seq_1_m.40798<br>PREDICTED: 40S ribosomal protein S15 [Ricinus communis]                     | 0.649 | Down | 0.00318  | 17.202 | 10.646 | 19.2 | 2  | 5  | 1 | 1.215 | 1.125 | 1.264 | 0.756 | 0.871 | 0.713 |
| Cellular Component | GO:0043226 | 2 | organelle               | 0.01146 | cds.Camellia_sinensis.comp304_52_c0_seq_2_m.40812<br>PREDICTED: methyl-CpG-binding domain-containing protein 11 [Vitis vinifera] | 0.588 | Down | 0.000185 | 29.818 | 34.764 | 28.8 | 6  | 8  | 5 | 1.237 | 1.268 | 1.251 | 0.782 | 0.683 | 0.745 |
| Cellular Component | GO:0043226 | 2 | organelle               | 0.01146 | cds.Camellia_sinensis.comp281_06_c0_seq_1_m.46951<br>PREDICTED: 60S ribosomal protein L21-1 [Daucus carota subsp. caryophyll]    | 0.659 | Down | 2.54E-06 | 18.716 | 16.424 | 30.5 | 6  | 12 | 6 | 1.198 | 1.207 | 1.205 | 0.774 | 0.798 | 0.807 |
| Cellular Component | GO:0043226 | 2 | organelle               | 0.01146 | cds.Camellia_sinensis.comp335_99_c1_seq_11_m.43029<br>PREDICTED: histone H2AX [Citrus sinensis]                                  | 0.584 | Down | 9.72E-05 | 14.658 | 6.2367 | 25   | 5  | 15 | 2 | 1.193 | 1.245 | 1.316 | 0.749 | 0.739 | 0.704 |
| Cellular Component | GO:0043226 | 2 | organelle               | 0.01146 | cds.CL83C.onlig1_m.15259<br>PREDICTED: tubulin alpha chain [Ziziphus jujubal]                                                    | 0.663 | Down | 0.0002   | 49.677 | 103.8  | 32   | 12 | 24 | 2 | 1.164 | 1.213 | 1.213 | 0.788 | 0.835 | 0.757 |
| Cellular Component | GO:0043226 | 2 | organelle               | 0.01146 | cds.Camellia_sinensis.comp301_46_c0_seq_1_m.21634<br>PREDICTED: nuclear pore complex protein NUP50A [Theobroma cacao]            | 0.612 | Down | 0.000323 | 44.255 | 6.2386 | 12.8 | 4  | 4  | 4 | 1.311 | 1.197 | 1.167 | 0.75  | 0.718 | 0.78  |
| Cellular Component | GO:0043226 | 2 | organelle               | 0.01146 | cds.Camellia_sinensis.comp309_91_c1_seq_6_m.41940<br>PREDICTED: HMG-Y-related protein A-like [Raphanus sativus]                  | 0.651 | Down | 0.00018  | 19.574 | 49.648 | 32.3 | 6  | 14 | 1 | 1.251 | 1.197 | 1.148 | 0.771 | 0.811 | 0.758 |
| Cellular Component | GO:0043226 | 2 | organelle               | 0.01146 | cds.Camellia_sinensis.comp199_29_c0_seq_1_m.31347<br>PREDICTED: clathrin light chain 1-like [Capsicum annuum]                    | 0.595 | Down | 1.87E-05 | 37.317 | 14.334 | 9.5  | 3  | 3  | 2 | 1.269 | 1.241 | 1.205 | 0.735 | 0.758 | 0.719 |
| Cellular Component | GO:0043226 | 2 | organelle               | 0.01146 | cds.Camellia_sinensis.comp346_63_c0_seq_10_m.34729<br>PREDICTED: 50S ribosomal protein L15, chloroplastic [Vitis vinifera]       | 0.649 | Down | 4.2E-06  | 29.408 | 47.897 | 29.7 | 7  | 10 | 7 | 1.179 | 1.227 | 1.204 | 0.766 | 0.789 | 0.787 |
| Cellular Component | GO:0043226 | 2 | organelle               | 0.01146 | cds.Camellia_sinensis.comp304_52_c0_seq_1_m.32345<br>PREDICTED: methyl-CpG-binding domain-containing protein 11 [Vitis vinifera] | 0.654 | Down | 0.000178 | 34.5   | 18.045 | 16.8 | 5  | 10 | 2 | 1.24  | 1.175 | 1.188 | 0.747 | 0.82  | 0.788 |

|                    |            |   |                              |          |                                                   |                                                                                |       |      |          |        |        |      |    |    |   |       |       |       |       |       |       |
|--------------------|------------|---|------------------------------|----------|---------------------------------------------------|--------------------------------------------------------------------------------|-------|------|----------|--------|--------|------|----|----|---|-------|-------|-------|-------|-------|-------|
| Cellular Component | GO:0043226 | 2 | organelle                    | 0.01146  | cds.Camellia_sinensis.comp117_16_c0_seq1_m.37295  | PREDICTED: D: 40S ribosomal protein S7 [Nelumbo nucifera]                      | 0.639 | Down | 1.55E-05 | 26.673 | 10.971 | 19.4 | 5  | 8  | 5 | 1.188 | 1.23  | 1.177 | 0.751 | 0.773 | 0.773 |
| Cellular Component | GO:0043226 | 2 | organelle                    | 0.01146  | cds.Camellia_sinensis.comp249_11_c0_seq1_m.38588  | PREDICTED: D: 40S ribosomal protein S11-like [Daucus carota subsp. sativus]    | 0.639 | Down | 7.59E-08 | 17.858 | 12.377 | 35.2 | 7  | 8  | 7 | 1.2   | 1.215 | 1.197 | 0.766 | 0.767 | 0.774 |
| Cellular Component | GO:0043226 | 2 | organelle                    | 0.01146  | cds.Camellia_sinensis.comp254_42_c0_seq1_m.40798  | PREDICTED: D: 40S ribosomal protein S15 [Ricinus communis]                     | 0.649 | Down | 0.00318  | 17.202 | 10.646 | 19.2 | 2  | 5  | 1 | 1.215 | 1.125 | 1.264 | 0.756 | 0.871 | 0.713 |
| Cellular Component | GO:0005634 | 8 | nucleus                      | 0.01935  | cds.Camellia_sinensis.comp304_52_c0_seq2_m.40812  | PREDICTED: D: methyl-CpG-binding domain-containing protein 11 [Vitis vinifera] | 0.588 | Down | 0.000185 | 29.818 | 34.764 | 28.8 | 6  | 8  | 5 | 1.237 | 1.268 | 1.251 | 0.782 | 0.683 | 0.745 |
| Cellular Component | GO:0005634 | 8 | nucleus                      | 0.01935  | cds.Camellia_sinensis.comp335_99_c1_seq11_m.43029 | PREDICTED: D: histone H2AX [Citrus sinensis]                                   | 0.584 | Down | 9.72E-05 | 14.658 | 6.2367 | 25   | 5  | 15 | 2 | 1.193 | 1.245 | 1.316 | 0.749 | 0.739 | 0.704 |
| Cellular Component | GO:0005634 | 8 | nucleus                      | 0.01935  | cds.Camellia_sinensis.comp304_52_c0_seq1_m.32345  | PREDICTED: D: methyl-CpG-binding domain-containing protein 11 [Vitis vinifera] | 0.654 | Down | 0.000178 | 34.5   | 18.045 | 16.8 | 5  | 10 | 2 | 1.24  | 1.175 | 1.188 | 0.747 | 0.82  | 0.788 |
| Cellular Component | GO:0005634 | 8 | nucleus                      | 0.01935  | cds.Camellia_sinensis.comp301_46_c0_seq1_m.21634  | PREDICTED: D: nuclear pore complex protein NUP50A [Theobroma cacao]            | 0.612 | Down | 0.000323 | 44.255 | 6.2386 | 12.8 | 4  | 4  | 4 | 1.311 | 1.197 | 1.167 | 0.75  | 0.718 | 0.78  |
| Cellular Component | GO:0005634 | 8 | nucleus                      | 0.01935  | cds.Camellia_sinensis.comp309_91_c1_seq6_m.41940  | PREDICTED: D: HMG-Y-related protein A-like [Raphanus sativus]                  | 0.651 | Down | 0.00018  | 19.574 | 49.648 | 32.3 | 6  | 14 | 1 | 1.251 | 1.197 | 1.148 | 0.771 | 0.811 | 0.758 |
| Cellular Component | GO:0044446 | 7 | intracellular organelle part | 0.025252 | cds.Camellia_sinensis.comp335_99_c1_seq11_m.43029 | PREDICTED: D: histone H2AX [Citrus sinensis]                                   | 0.584 | Down | 9.72E-05 | 14.658 | 6.2367 | 25   | 5  | 15 | 2 | 1.193 | 1.245 | 1.316 | 0.749 | 0.739 | 0.704 |
| Cellular Component | GO:0044446 | 7 | intracellular organelle part | 0.025252 | cds.Camellia_sinensis.comp346_63_c0_seq10_m.34729 | PREDICTED: D: 50S ribosomal protein L15, chloroplastic [Vitis vinifera]        | 0.649 | Down | 4.2E-06  | 29.408 | 47.897 | 29.7 | 7  | 10 | 7 | 1.179 | 1.227 | 1.204 | 0.766 | 0.789 | 0.787 |
| Cellular Component | GO:0044446 | 7 | intracellular organelle part | 0.025252 | cds.CL83C.onig1_m.15259                           | PREDICTED: D: tubulin alpha chain [Ziziphus jujubal]                           | 0.663 | Down | 0.0002   | 49.677 | 103.8  | 32   | 12 | 24 | 2 | 1.164 | 1.213 | 1.213 | 0.788 | 0.835 | 0.757 |
| Cellular Component | GO:0044446 | 7 | intracellular organelle part | 0.025252 | cds.Camellia_sinensis.comp301_46_c0_seq1_m.21634  | PREDICTED: D: nuclear pore complex protein NUP50A [Theobroma cacao]            | 0.612 | Down | 0.000323 | 44.255 | 6.2386 | 12.8 | 4  | 4  | 4 | 1.311 | 1.197 | 1.167 | 0.75  | 0.718 | 0.78  |
| Cellular Component | GO:0044446 | 7 | intracellular organelle part | 0.025252 | cds.Camellia_sinensis.comp309_91_c1_seq6_m.41940  | PREDICTED: D: HMG-Y-related protein A-like [Raphanus sativus]                  | 0.651 | Down | 0.00018  | 19.574 | 49.648 | 32.3 | 6  | 14 | 1 | 1.251 | 1.197 | 1.148 | 0.771 | 0.811 | 0.758 |
| Cellular Component | GO:0044446 | 7 | intracellular organelle part | 0.025252 | cds.Camellia_sinensis.comp254_42_c0_seq1_m.40798  | PREDICTED: D: 40S ribosomal protein S15 [Ricinus communis]                     | 0.649 | Down | 0.00318  | 17.202 | 10.646 | 19.2 | 2  | 5  | 1 | 1.215 | 1.125 | 1.264 | 0.756 | 0.871 | 0.713 |
| Cellular Component | GO:0044446 | 7 | intracellular organelle part | 0.025252 | cds.Camellia_sinensis.comp199_29_c0_seq7_m.31347  | PREDICTED: D: clathrin light chain 1-like [Capsicum annuum]                    | 0.595 | Down | 1.87E-05 | 37.317 | 14.334 | 9.5  | 3  | 3  | 2 | 1.269 | 1.241 | 1.205 | 0.735 | 0.758 | 0.719 |
| Cellular Component | GO:0044422 | 3 | organelle part               | 0.025252 | cds.Camellia_sinensis.comp335_99_c1_seq11_m.43029 | PREDICTED: D: histone H2AX [Citrus sinensis]                                   | 0.584 | Down | 9.72E-05 | 14.658 | 6.2367 | 25   | 5  | 15 | 2 | 1.193 | 1.245 | 1.316 | 0.749 | 0.739 | 0.704 |
| Cellular Component | GO:0044422 | 3 | organelle part               | 0.025252 | cds.Camellia_sinensis.comp346_63_c0_seq10_m.34729 | PREDICTED: D: 50S ribosomal protein L15, chloroplastic [Vitis vinifera]        | 0.649 | Down | 4.2E-06  | 29.408 | 47.897 | 29.7 | 7  | 10 | 7 | 1.179 | 1.227 | 1.204 | 0.766 | 0.789 | 0.787 |
| Cellular Component | GO:0044422 | 3 | organelle part               | 0.025252 | cds.CL83C.onig1_m.15259                           | PREDICTED: D: tubulin alpha chain [Ziziphus jujubal]                           | 0.663 | Down | 0.0002   | 49.677 | 103.8  | 32   | 12 | 24 | 2 | 1.164 | 1.213 | 1.213 | 0.788 | 0.835 | 0.757 |
| Cellular Component | GO:0044422 | 3 | organelle part               | 0.025252 | cds.Camellia_sinensis.comp301_46_c0_seq1_m.21634  | PREDICTED: D: nuclear pore complex protein NUP50A [Theobroma cacao]            | 0.612 | Down | 0.000323 | 44.255 | 6.2386 | 12.8 | 4  | 4  | 4 | 1.311 | 1.197 | 1.167 | 0.75  | 0.718 | 0.78  |

|                    |            |   |                                                |          |                                                 |                                                                                              |       |      |          |        |        |      |    |    |    |       |       |       |       |       |       |
|--------------------|------------|---|------------------------------------------------|----------|-------------------------------------------------|----------------------------------------------------------------------------------------------|-------|------|----------|--------|--------|------|----|----|----|-------|-------|-------|-------|-------|-------|
| Cellular Component | GO:0044422 | 3 | organelle part                                 | 0.025252 | cds.Camellia_sinensis.comp30991_c1_seq6_m.41940 | PREDICTED: HMG-Y-related protein A-like [Raphanus sativus]                                   | 0.651 | Down | 0.00018  | 19.574 | 49.648 | 32.3 | 6  | 14 | 1  | 1.251 | 1.197 | 1.148 | 0.771 | 0.811 | 0.758 |
| Cellular Component | GO:0044422 | 3 | organelle part                                 | 0.025252 | cds.Camellia_sinensis.comp25442_c0_seq1_m.40798 | PREDICTED: 40S ribosomal protein S15 [Ricinus communis]                                      | 0.649 | Down | 0.00318  | 17.202 | 10.646 | 19.2 | 2  | 5  | 1  | 1.215 | 1.125 | 1.264 | 0.756 | 0.871 | 0.713 |
| Cellular Component | GO:0044422 | 3 | organelle part                                 | 0.025252 | cds.Camellia_sinensis.comp19929_c0_seq1_m.31347 | PREDICTED: clathrin light chain 1-like [Capsicum annuum]                                     | 0.595 | Down | 1.87E-05 | 37.317 | 14.334 | 9.5  | 3  | 3  | 2  | 1.269 | 1.241 | 1.205 | 0.735 | 0.758 | 0.719 |
| Cellular Component | GO:0071944 | 4 | cell periphery                                 | 0.037305 | cds.Camellia_sinensis.comp7306_c0_seq1_m.21311  | PREDICTED: pectinesterase-like [Gossypium hirsutum]                                          | 0.662 | Down | 4.3E-06  | 56.944 | 99.605 | 20.4 | 8  | 22 | 8  | 1.19  | 1.181 | 1.217 | 0.809 | 0.786 | 0.78  |
| Cellular Component | GO:0071944 | 4 | cell periphery                                 | 0.037305 | cds.Camellia_sinensis.comp26419_c0_seq1_m.19908 | PREDICTED: probable xyloglucan endotransglucosylase/hydrolase protein 6 [Juglans regia]      | 0.573 | Down | 5.66E-05 | 32.893 | 26.298 | 26.8 | 8  | 11 | 6  | 1.24  | 1.256 | 1.279 | 0.758 | 0.72  | 0.685 |
| Cellular Component | GO:0071944 | 4 | cell periphery                                 | 0.037305 | cds.Camellia_sinensis.comp19929_c0_seq1_m.31347 | PREDICTED: clathrin light chain 1-like [Capsicum annuum]                                     | 0.595 | Down | 1.87E-05 | 37.317 | 14.334 | 9.5  | 3  | 3  | 2  | 1.269 | 1.241 | 1.205 | 0.735 | 0.758 | 0.719 |
| Molecular Function | GO:0003855 | 6 | 3-dehydroquinase activity                      | 0.001751 | cds.Camellia_sinensis.comp28445_c0_seq1_m.18163 | PREDICTED: bifunctional 3-dehydroquinase/urate dehydrogenase, chloroplastic [Vitis vinifera] | 0.422 | Down | 1.75E-05 | 56.806 | 13.472 | 8.6  | 5  | 7  | 4  | 1.421 | 1.362 | 1.341 | 0.547 | 0.603 | 0.591 |
| Molecular Function | GO:0003855 | 6 | 3-dehydroquinase activity                      | 0.001751 | cds.Camellia_sinensis.comp12441_c0_seq1_m.14154 | PREDICTED: bifunctional 3-dehydroquinase/urate dehydrogenase, chloroplastic [Vitis vinifera] | 0.557 | Down | 1.48E-06 | 58.235 | 113.88 | 32.7 | 17 | 30 | 16 | 1.237 | 1.275 | 1.282 | 0.707 | 0.716 | 0.69  |
| Molecular Function | GO:0003849 | 5 | 3-deoxy-7-phosphoheptulonate synthase activity | 0.001751 | cds.Camellia_sinensis.comp30057_c1_seq2_m.50785 | PREDICTED: 3-deoxyheptonate aldolase 1, chloroplastic-like [Malus domestica]                 | 0.492 | Down | 3.57E-05 | 19.615 | 40.349 | 26.9 | 4  | 8  | 4  | 1.335 | 1.244 | 1.382 | 0.642 | 0.668 | 0.639 |
| Molecular Function | GO:0003849 | 5 | 3-deoxy-7-phosphoheptulonate synthase activity | 0.001751 | cds.Camellia_sinensis.comp30057_c0_seq1_m.29301 | PREDICTED: deoxyphosphate aldolase family protein [Populus trichocarpa]                      | 0.521 | Down | 0.000523 | 43.241 | 36.368 | 32.1 | 13 | 31 | 7  | 1.294 | 1.258 | 1.324 | 0.676 | 0.671 | 0.673 |
| Molecular Function | GO:0004764 | 6 | shikimate 3-dehydrogenase (NADP+) activity     | 0.001751 | cds.Camellia_sinensis.comp28445_c0_seq1_m.18163 | PREDICTED: bifunctional 3-dehydroquinase/urate dehydrogenase, chloroplastic [Vitis vinifera] | 0.422 | Down | 1.75E-05 | 56.806 | 13.472 | 8.6  | 5  | 7  | 4  | 1.421 | 1.362 | 1.341 | 0.547 | 0.603 | 0.591 |
| Molecular Function | GO:0004764 | 6 | shikimate 3-dehydrogenase (NADP+) activity     | 0.001751 | cds.Camellia_sinensis.comp12441_c0_seq1_m.14154 | PREDICTED: bifunctional 3-dehydroquinase/urate dehydrogenase, chloroplastic [Vitis vinifera] | 0.557 | Down | 1.48E-06 | 58.235 | 113.88 | 32.7 | 17 | 30 | 16 | 1.237 | 1.275 | 1.282 | 0.707 | 0.716 | 0.69  |
| Molecular Function | GO:0016746 | 4 | transferase activity, transferring acyl groups | 0.003686 | cds.Camellia_sinensis.comp28704_c0_seq1_m.23471 | PREDICTED: BAHD acyltransferase DCR [Nicotiana attenuata]                                    | 0.462 | Down | 6.9E-07  | 49.995 | 46.095 | 13.4 | 5  | 6  | 5  | 1.335 | 1.368 | 1.341 | 0.636 | 0.605 | 0.629 |
| Molecular Function | GO:0016746 | 4 | transferase activity, transferring acyl groups | 0.003686 | cds.Camellia_sinensis.comp24164_c0_seq1_m.25907 | PREDICTED: protein ECE1/ERF1 UM 26 [Vitis vinifera]                                          | 0.557 | Down | 0.001556 | 49.78  | 18.322 | 13.3 | 5  | 8  | 5  | 1.223 | 1.255 | 1.319 | 0.68  | 0.807 | 0.629 |

|                    |            |   |                                                |          |                                                                                                                                                             |                                                                                                              |       |      |          |        |        |      |    |    |    |       |       |       |       |       |       |
|--------------------|------------|---|------------------------------------------------|----------|-------------------------------------------------------------------------------------------------------------------------------------------------------------|--------------------------------------------------------------------------------------------------------------|-------|------|----------|--------|--------|------|----|----|----|-------|-------|-------|-------|-------|-------|
| Molecular Function | GO:0016746 | 4 | transferase activity, transferring acyl groups | 0.003686 | cds.Camellia_sinensis.comp163_73_c0_seq_1_m.51330<br>cds.Camellia_sinensis.comp273_50_c0_seq_1_m.24260<br>cds.Camellia_sinensis.comp412_98_c0_seq_1_m.23229 | PREDICTED: chalcone synthase (Pyrus bretschneideri)                                                          | 0.391 | Down | 6.01E-05 | 19.938 | 47.804 | 46.6 | 6  | 27 | 1  | 1.467 | 1.452 | 1.298 | 0.561 | 0.511 | 0.575 |
| Molecular Function | GO:0016746 | 4 | transferase activity, transferring acyl groups | 0.003686 | cds.Camellia_sinensis.comp412_74_c0_seq_1_m.27135                                                                                                           | PREDICTED: chalcone synthase 1 (Juglans regia)                                                               | 0.35  | Down | 2.17E-05 | 48.966 | 67.923 | 32.2 | 11 | 35 | 2  | 1.518 | 1.391 | 1.424 | 0.472 | 0.54  | 0.506 |
| Molecular Function | GO:0016746 | 4 | transferase activity, transferring acyl groups | 0.003686 | cds.Camellia_sinensis.comp242_98_c0_seq_1_m.23229                                                                                                           | PREDICTED: D: 3-ketoacyl-CoA synthase 6 (Sesamum indicum)                                                    | 0.213 | Down | 0.006598 | 56.181 | 4.7365 | 4.4  | 2  | 3  | 2  | 1.558 | 1.615 | 1.613 | 0.265 | 0.345 | 0.41  |
| Molecular Function | GO:0016746 | 4 | transferase activity, transferring acyl groups | 0.003686 | cds.Camellia_sinensis.comp412_74_c0_seq_1_m.27135                                                                                                           | D: omega-linolenic acid hydroxylase (Vitis vinifera)                                                         | 0.534 | Down | 5.93E-05 | 50.195 | 15.876 | 13.3 | 6  | 10 | 6  | 1.296 | 1.24  | 1.31  | 0.678 | 0.725 | 0.652 |
| Molecular Function | GO:0016841 | 5 | ammonia-lyase activity                         | 0.008343 | cds.Camellia_sinensis.comp248_18_c0_seq_1_m.28200                                                                                                           | PREDICTED: phenylalanine ammonia-lyase 1 (Daucus carota subsp. cataract)                                     | 0.48  | Down | 2.07E-05 | 45.753 | 19.992 | 40.3 | 16 | 32 | 7  | 1.376 | 1.315 | 1.268 | 0.616 | 0.661 | 0.625 |
| Molecular Function | GO:0016841 | 5 | ammonia-lyase activity                         | 0.008343 | cds.Camellia_sinensis.comp323_04_c0_seq_3_m.11225                                                                                                           | PREDICTED: phenylalanine ammonia-lyase (Vitis vinifera)                                                      | 0.417 | Down | 1.92E-07 | 77.077 | 118.08 | 37.8 | 25 | 54 | 6  | 1.375 | 1.378 | 1.392 | 0.561 | 0.579 | 0.587 |
| Molecular Function | GO:0020037 | 5 | heme binding                                   | 0.01063  | cds.Camellia_sinensis.comp349_96_c0_seq_1_m.19097                                                                                                           | PREDICTED: flavonoid 3'-hydroxylase (Vitis vinifera)                                                         | 0.538 | Down | 2.09E-06 | 57.059 | 17.251 | 19.1 | 9  | 14 | 9  | 1.248 | 1.29  | 1.269 | 0.668 | 0.678 | 0.703 |
| Molecular Function | GO:0020037 | 5 | heme binding                                   | 0.01063  | cds.Camellia_sinensis.comp281_42_c0_seq_1_m.18076                                                                                                           | D: trans-cinnamate monooxygenase (Jatropha curcas)                                                           | 0.578 | Down | 1.1E-06  | 60.624 | 61.458 | 26.1 | 13 | 20 | 13 | 1.245 | 1.257 | 1.245 | 0.711 | 0.741 | 0.714 |
| Molecular Function | GO:0020037 | 5 | heme binding                                   | 0.01063  | cds.Camellia_sinensis.comp249_56_c0_seq_1_m.23294                                                                                                           | PREDICTED: peroxidase 42 (Eucalyptus crandickii)                                                             | 0.609 | Down | 2.14E-05 | 37.589 | 27.808 | 24   | 6  | 6  | 6  | 1.202 | 1.251 | 1.235 | 0.749 | 0.773 | 0.725 |
| Molecular Function | GO:0020037 | 5 | heme binding                                   | 0.01063  | cds.Camellia_sinensis.comp314_51_c0_seq_1_m.18500                                                                                                           | PREDICTED: cytochrome P450 86B1-like (Sesamum indicum)                                                       | 0.487 | Down | 0.000742 | 57.848 | 5.5293 | 6.8  | 3  | 3  | 3  | 1.404 | 1.26  | 1.295 | 0.609 | 0.584 | 0.735 |
| Molecular Function | GO:0020037 | 5 | heme binding                                   | 0.01063  | cds.Camellia_sinensis.comp350_44_c0_seq_1_m.44426                                                                                                           | PREDICTED: cytochrome b5 (Vitis vinifera)                                                                    | 0.584 | Down | 0.000804 | 17.783 | 29.766 | 39.6 | 4  | 8  | 4  | 1.317 | 1.204 | 1.242 | 0.773 | 0.657 | 0.768 |
| Molecular Function | GO:0020037 | 5 | heme binding                                   | 0.01063  | cds.Camellia_sinensis.comp261_37_c0_seq_1_m.14029                                                                                                           | PREDICTED: flavonoid 3',5'-hydroxylase 2-like (Jatropha curcas)                                              | 0.479 | Down | 0.000165 | 57.074 | 16.113 | 17.6 | 8  | 10 | 8  | 1.242 | 1.363 | 1.379 | 0.639 | 0.682 | 0.588 |
| Molecular Function | GO:0016835 | 4 | carbon-oxygen lyase activity                   | 0.013102 | cds.Camellia_sinensis.comp284_45_c0_seq_1_m.18163                                                                                                           | PREDICTED: bifunctional 3-dehydroquinate dehydratase/shikimate dehydrogenase, chloroplastic (Vitis vinifera) | 0.422 | Down | 1.75E-05 | 56.806 | 13.472 | 8.6  | 5  | 7  | 4  | 1.421 | 1.362 | 1.341 | 0.547 | 0.603 | 0.591 |
| Molecular Function | GO:0016835 | 4 | carbon-oxygen lyase activity                   | 0.013102 | cds.Camellia_sinensis.comp325_92_c3_seq_4_m.29222                                                                                                           | PREDICTED: D: arogenate dehydratase 3, chloroplastic (Vitis vinifera)                                        | 0.583 | Down | 0.003784 | 45.948 | 3.0291 | 4.3  | 2  | 2  | 2  | 1.331 | 1.137 | 1.271 | 0.663 | 0.842 | 0.675 |
| Molecular Function | GO:0016835 | 4 | carbon-oxygen lyase activity                   | 0.013102 | cds.Camellia_sinensis.comp124_41_c0_seq_1_m.14154                                                                                                           | PREDICTED: bifunctional 3-dehydroquinate dehydratase/shikimate dehydrogenase, chloroplastic (Vitis vinifera) | 0.557 | Down | 1.48E-06 | 58.235 | 113.88 | 32.7 | 17 | 30 | 16 | 1.237 | 1.275 | 1.282 | 0.707 | 0.716 | 0.69  |
| Molecular Function | GO:0016835 | 4 | carbon-oxygen lyase activity                   | 0.013102 | cds.Camellia_sinensis.comp337_76_c0_seq_1_m.19252                                                                                                           | PREDICTED: D: (-)-alpha-terpineol synthase (Vitis vinifera)                                                  | 0.505 | Down | 2.15E-05 | 70.02  | 47.141 | 12.2 | 7  | 10 | 7  | 1.351 | 1.265 | 1.304 | 0.639 | 0.691 | 0.651 |
| Molecular Function | GO:0046906 | 4 | tetrapyrrole binding                           | 0.013468 | cds.Camellia_sinensis.comp349_96_c0_seq_1_m.19097                                                                                                           | PREDICTED: flavonoid 3'-hydroxylase (Vitis vinifera)                                                         | 0.538 | Down | 2.09E-06 | 57.059 | 17.251 | 19.1 | 9  | 14 | 9  | 1.248 | 1.29  | 1.269 | 0.668 | 0.678 | 0.703 |

| Category           | GO ID      | Count | Gene Name                                                                     | Accession | Protein Name                                      | Score                                                                                | Direction | Value 1 | Value 2  | Value 3 | Value 4 | Value 5 | Value 6 | Value 7 | Value 8 | Value 9 | Value 10 | Value 11 | Value 12 |       |       |
|--------------------|------------|-------|-------------------------------------------------------------------------------|-----------|---------------------------------------------------|--------------------------------------------------------------------------------------|-----------|---------|----------|---------|---------|---------|---------|---------|---------|---------|----------|----------|----------|-------|-------|
| Molecular Function | GO:0046906 | 4     | tetrapyrrole binding                                                          | 0.013468  | cds.Camellia_sinensis.comp281_42_c0_seq_1_m.18076 | PREDICTED: trans-cinnamate monooxygenase [Iatropa curraci]                           | 0.578     | Down    | 1.1E-06  | 60.624  | 61.458  | 26.1    | 13      | 20      | 13      | 1.257   | 1.245    | 0.711    | 0.741    | 0.714 |       |
| Molecular Function | GO:0046906 | 4     | tetrapyrrole binding                                                          | 0.013468  | cds.Camellia_sinensis.comp249_56_c0_seq_1_m.23294 | PREDICTED: peroxidase [Eucalyptus grandis]                                           | 0.609     | Down    | 2.14E-05 | 37.589  | 27.808  | 24      | 6       | 6       | 6       | 1.202   | 1.251    | 1.235    | 0.749    | 0.773 | 0.725 |
| Molecular Function | GO:0046906 | 4     | tetrapyrrole binding                                                          | 0.013468  | cds.Camellia_sinensis.comp314_51_c0_seq_1_m.18500 | PREDICTED: cytochrome b5-like [Sesamum indicum]                                      | 0.487     | Down    | 0.000742 | 57.848  | 5.5293  | 6.8     | 3       | 3       | 3       | 1.404   | 1.26     | 1.295    | 0.609    | 0.584 | 0.735 |
| Molecular Function | GO:0046906 | 4     | tetrapyrrole binding                                                          | 0.013468  | cds.Camellia_sinensis.comp350_44_c0_seq_1_m.44426 | PREDICTED: cytochrome b5 [Vitis vinifera]                                            | 0.584     | Down    | 0.000804 | 17.783  | 29.766  | 39.6    | 4       | 8       | 4       | 1.317   | 1.204    | 1.242    | 0.773    | 0.657 | 0.768 |
| Molecular Function | GO:0046906 | 4     | tetrapyrrole binding                                                          | 0.013468  | cds.Camellia_sinensis.comp261_37_c0_seq_1_m.14029 | PREDICTED: flavonoid 3',5'-hydroxylase 2-like [Iatropa curraci]                      | 0.479     | Down    | 0.000165 | 57.074  | 16.113  | 17.6    | 8       | 10      | 8       | 1.242   | 1.363    | 1.379    | 0.639    | 0.682 | 0.588 |
| Biological Process | GO:0006558 | 11    | L-phenylalanine metabolic process                                             | 0.0004    | cds.Camellia_sinensis.comp248_18_c0_seq_1_m.28200 | PREDICTED: phenylalanine ammonia-lyase 1 [Daucus carota subsp. carota]               | 0.48      | Down    | 2.07E-05 | 45.753  | 19.992  | 40.3    | 16      | 32      | 7       | 1.376   | 1.315    | 1.268    | 0.616    | 0.661 | 0.625 |
| Biological Process | GO:0006558 | 11    | L-phenylalanine metabolic process                                             | 0.0004    | cds.Camellia_sinensis.comp325_92_c3_seq_4_m.29222 | PREDICTED: arogenate dehydratase 3, chloroplastic [Vitis vinifera]                   | 0.583     | Down    | 0.003784 | 45.948  | 3.0291  | 4.3     | 2       | 2       | 1       | 1.331   | 1.137    | 1.271    | 0.663    | 0.842 | 0.675 |
| Biological Process | GO:0006558 | 11    | L-phenylalanine metabolic process                                             | 0.0004    | cds.Camellia_sinensis.comp323_04_c0_seq_3_m.11225 | PREDICTED: phenylalanine ammonia-lyase [Vitis vinifera]                              | 0.417     | Down    | 1.92E-07 | 77.077  | 118.08  | 37.8    | 25      | 54      | 6       | 1.375   | 1.378    | 1.392    | 0.561    | 0.579 | 0.587 |
| Biological Process | GO:190221  | 10    | erythrose 4-phosphate/phosphoenolpyruvate family amino acid metabolic process | 0.0004    | cds.Camellia_sinensis.comp248_18_c0_seq_1_m.28200 | PREDICTED: phenylalanine ammonia-lyase 1 [Daucus carota subsp. carota]               | 0.48      | Down    | 2.07E-05 | 45.753  | 19.992  | 40.3    | 16      | 32      | 7       | 1.376   | 1.315    | 1.268    | 0.616    | 0.661 | 0.625 |
| Biological Process | GO:190221  | 10    | erythrose 4-phosphate/phosphoenolpyruvate family amino acid metabolic process | 0.0004    | cds.Camellia_sinensis.comp325_92_c3_seq_4_m.29222 | PREDICTED: arogenate dehydratase 3, chloroplastic [Vitis vinifera]                   | 0.583     | Down    | 0.003784 | 45.948  | 3.0291  | 4.3     | 2       | 2       | 1       | 1.331   | 1.137    | 1.271    | 0.663    | 0.842 | 0.675 |
| Biological Process | GO:190221  | 10    | erythrose 4-phosphate/phosphoenolpyruvate family amino acid metabolic process | 0.0004    | cds.Camellia_sinensis.comp323_04_c0_seq_3_m.11225 | PREDICTED: phenylalanine ammonia-lyase [Vitis vinifera]                              | 0.417     | Down    | 1.92E-07 | 77.077  | 118.08  | 37.8    | 25      | 54      | 6       | 1.375   | 1.378    | 1.392    | 0.561    | 0.579 | 0.587 |
| Biological Process | GO:0009072 | 9     | aromatic amino acid family metabolic process                                  | 0.000631  | cds.Camellia_sinensis.comp248_18_c0_seq_1_m.28200 | PREDICTED: phenylalanine ammonia-lyase 1 [Daucus carota subsp. carota]               | 0.48      | Down    | 2.07E-05 | 45.753  | 19.992  | 40.3    | 16      | 32      | 7       | 1.376   | 1.315    | 1.268    | 0.616    | 0.661 | 0.625 |
| Biological Process | GO:0009072 | 9     | aromatic amino acid family metabolic process                                  | 0.000631  | cds.Camellia_sinensis.comp300_57_c1_seq_2_m.50785 | PREDICTED: dehydro-3-deoxyheptanate aldolase 1, chloroplastic-like [Malus domestica] | 0.492     | Down    | 3.57E-05 | 19.615  | 40.349  | 26.9    | 4       | 8       | 4       | 1.335   | 1.244    | 1.382    | 0.642    | 0.668 | 0.639 |
| Biological Process | GO:0009072 | 9     | aromatic amino acid family metabolic process                                  | 0.000631  | cds.Camellia_sinensis.comp325_92_c3_seq_4_m.29222 | PREDICTED: arogenate dehydratase 3, chloroplastic [Vitis vinifera]                   | 0.583     | Down    | 0.003784 | 45.948  | 3.0291  | 4.3     | 2       | 2       | 1       | 1.331   | 1.137    | 1.271    | 0.663    | 0.842 | 0.675 |
| Biological Process | GO:0009072 | 9     | aromatic amino acid family metabolic process                                  | 0.000631  | cds.Camellia_sinensis.comp300_57_c0_seq_1_m.29301 | PREDICTED: deoxyphosphoheptanate aldolase family protein [Populus trichocarpa]       | 0.521     | Down    | 0.000523 | 43.241  | 36.368  | 32.1    | 13      | 31      | 7       | 1.294   | 1.258    | 1.324    | 0.676    | 0.671 | 0.673 |
| Biological Process | GO:0009072 | 9     | aromatic amino acid family metabolic process                                  | 0.000631  | cds.Camellia_sinensis.comp323_04_c0_seq_3_m.11225 | PREDICTED: phenylalanine ammonia-lyase [Vitis vinifera]                              | 0.417     | Down    | 1.92E-07 | 77.077  | 118.08  | 37.8    | 25      | 54      | 6       | 1.375   | 1.378    | 1.392    | 0.561    | 0.579 | 0.587 |

|                    |            |    |                                                                               |          |                                                    |                                                                                         |       |      |          |        |        |      |    |    |   |       |       |       |       |       |       |
|--------------------|------------|----|-------------------------------------------------------------------------------|----------|----------------------------------------------------|-----------------------------------------------------------------------------------------|-------|------|----------|--------|--------|------|----|----|---|-------|-------|-------|-------|-------|-------|
| Biological Process | GO:190222  | 11 | erythrose 4-phosphate/phosphoenolpyruvate family amino acid catabolic process | 0.005163 | cds.Camellia_sinensis.comp248_18_c0_seq_1_m.2820_0 | PREDICTED: phenylalanine ammonia-lyase 1 [Daucus carota subsp. catus]                   | 0.48  | Down | 2.07E-05 | 45.753 | 19.992 | 40.3 | 16 | 32 | 7 | 1.376 | 1.315 | 1.268 | 0.616 | 0.661 | 0.625 |
| Biological Process | GO:190222  | 11 | erythrose 4-phosphate/phosphoenolpyruvate family amino acid catabolic process | 0.005163 | cds.Camellia_sinensis.comp323_04_c0_seq_3_m.1122_5 | PREDICTED: phenylalanine ammonia-lyase [Vitis vinifera]                                 | 0.417 | Down | 1.92E-07 | 77.077 | 118.08 | 37.8 | 25 | 54 | 6 | 1.375 | 1.378 | 1.392 | 0.561 | 0.579 | 0.587 |
| Biological Process | GO:0006559 | 12 | L-phenylalanine catabolic process                                             | 0.005163 | cds.Camellia_sinensis.comp248_18_c0_seq_1_m.2820_0 | PREDICTED: phenylalanine ammonia-lyase 1 [Daucus carota subsp. catus]                   | 0.48  | Down | 2.07E-05 | 45.753 | 19.992 | 40.3 | 16 | 32 | 7 | 1.376 | 1.315 | 1.268 | 0.616 | 0.661 | 0.625 |
| Biological Process | GO:0006559 | 12 | L-phenylalanine catabolic process                                             | 0.005163 | cds.Camellia_sinensis.comp323_04_c0_seq_3_m.1122_5 | PREDICTED: phenylalanine ammonia-lyase [Vitis vinifera]                                 | 0.417 | Down | 1.92E-07 | 77.077 | 118.08 | 37.8 | 25 | 54 | 6 | 1.375 | 1.378 | 1.392 | 0.561 | 0.579 | 0.587 |
| Biological Process | GO:0009074 | 10 | aromatic amino acid family catabolic process                                  | 0.007628 | cds.Camellia_sinensis.comp248_18_c0_seq_1_m.2820_0 | PREDICTED: phenylalanine ammonia-lyase 1 [Daucus carota subsp. catus]                   | 0.48  | Down | 2.07E-05 | 45.753 | 19.992 | 40.3 | 16 | 32 | 7 | 1.376 | 1.315 | 1.268 | 0.616 | 0.661 | 0.625 |
| Biological Process | GO:0009074 | 10 | aromatic amino acid family catabolic process                                  | 0.007628 | cds.Camellia_sinensis.comp323_04_c0_seq_3_m.1122_5 | PREDICTED: phenylalanine ammonia-lyase [Vitis vinifera]                                 | 0.417 | Down | 1.92E-07 | 77.077 | 118.08 | 37.8 | 25 | 54 | 6 | 1.375 | 1.378 | 1.392 | 0.561 | 0.579 | 0.587 |
| Biological Process | GO:0009073 | 10 | aromatic amino acid family biosynthetic process                               | 0.007766 | cds.Camellia_sinensis.comp300_57_c1_seq_2_m.5078_5 | PREDICTED: deoxyheptonate aldolase 1, chloroplastic-like [Malus domestica]              | 0.492 | Down | 3.57E-05 | 19.615 | 40.349 | 26.9 | 4  | 8  | 4 | 1.335 | 1.244 | 1.382 | 0.642 | 0.668 | 0.639 |
| Biological Process | GO:0009073 | 10 | aromatic amino acid family biosynthetic process                               | 0.007766 | cds.Camellia_sinensis.comp325_92_c3_seq_4_m.2922_2 | PREDICTED: argenate dehydratase 3, chloroplastic [Vitis vinifera]                       | 0.583 | Down | 0.003784 | 45.948 | 3.0291 | 4.3  | 2  | 2  | 1 | 1.331 | 1.137 | 1.271 | 0.663 | 0.842 | 0.675 |
| Biological Process | GO:0009073 | 10 | aromatic amino acid family biosynthetic process                               | 0.007766 | cds.Camellia_sinensis.comp300_57_c0_seq_1_m.2930_1 | PREDICTED: deoxyphosphoheptonate aldolase family protein [Populus trichocarpa]          | 0.521 | Down | 0.000523 | 43.241 | 36.368 | 32.1 | 13 | 31 | 7 | 1.294 | 1.258 | 1.324 | 0.676 | 0.671 | 0.673 |
| Biological Process | GO:0044036 | 6  | cell wall macromolecule metabolic process                                     | 0.013816 | cds.Camellia_sinensis.comp264_19_c0_seq_1_m.1990_8 | PREDICTED: probable xyloglucan endotransglucosylase/hydrolase protein 6 [Juglans regia] | 0.573 | Down | 5.66E-05 | 32.893 | 26.298 | 26.8 | 8  | 11 | 6 | 1.24  | 1.256 | 1.279 | 0.758 | 0.72  | 0.685 |
| Biological Process | GO:0044036 | 6  | cell wall macromolecule metabolic process                                     | 0.013816 | cds.Camellia_sinensis.comp345_86_c0_seq_4_m.3239_6 | PREDICTED: endochitinase PR4-like [Nelumbo nucifera]                                    | 1.537 | Up   | 0.000316 | 24.711 | 10.503 | 11.5 | 2  | 2  | 2 | 0.855 | 0.774 | 0.763 | 1.226 | 1.205 | 1.246 |
| Biological Process | GO:1901565 | 5  | organonitrogen compound catabolic process                                     | 0.021679 | cds.Camellia_sinensis.comp248_18_c0_seq_1_m.2820_0 | PREDICTED: phenylalanine ammonia-lyase 1 [Daucus carota subsp. catus]                   | 0.48  | Down | 2.07E-05 | 45.753 | 19.992 | 40.3 | 16 | 32 | 7 | 1.376 | 1.315 | 1.268 | 0.616 | 0.661 | 0.625 |
| Biological Process | GO:1901565 | 5  | organonitrogen compound catabolic process                                     | 0.021679 | cds.Camellia_sinensis.comp345_86_c0_seq_4_m.3239_6 | PREDICTED: endochitinase PR4-like [Nelumbo nucifera]                                    | 1.537 | Up   | 0.000316 | 24.711 | 10.503 | 11.5 | 2  | 2  | 2 | 0.855 | 0.774 | 0.763 | 1.226 | 1.205 | 1.246 |
| Biological Process | GO:1901565 | 5  | organonitrogen compound catabolic process                                     | 0.021679 | cds.Camellia_sinensis.comp323_04_c0_seq_3_m.1122_5 | PREDICTED: phenylalanine ammonia-lyase [Vitis vinifera]                                 | 0.417 | Down | 1.92E-07 | 77.077 | 118.08 | 37.8 | 25 | 54 | 6 | 1.375 | 1.378 | 1.392 | 0.561 | 0.579 | 0.587 |
| Biological Process | GO:1901606 | 10 | alpha-amino acid catabolic process                                            | 0.046652 | cds.Camellia_sinensis.comp248_18_c0_seq_1_m.2820_0 | PREDICTED: phenylalanine ammonia-lyase 1 [Daucus carota subsp. catus]                   | 0.48  | Down | 2.07E-05 | 45.753 | 19.992 | 40.3 | 16 | 32 | 7 | 1.376 | 1.315 | 1.268 | 0.616 | 0.661 | 0.625 |

|                    |            |    |                                    |          |                                                 |                                                         |       |      |          |        |        |      |    |    |   |       |       |       |       |       |       |
|--------------------|------------|----|------------------------------------|----------|-------------------------------------------------|---------------------------------------------------------|-------|------|----------|--------|--------|------|----|----|---|-------|-------|-------|-------|-------|-------|
| Biological Process | GO:1901606 | 10 | alpha-amino acid catabolic process | 0.046652 | cds.Camellia_sinensis.comp32304_c0_seq3_m.11225 | PREDICTED: phenylalanine ammonia-lyase [Vitis vinifera] | 0.417 | Down | 1.92E-07 | 77.077 | 118.08 | 37.8 | 25 | 54 | 6 | 1.375 | 1.378 | 1.392 | 0.561 | 0.579 | 0.587 |
|--------------------|------------|----|------------------------------------|----------|-------------------------------------------------|---------------------------------------------------------|-------|------|----------|--------|--------|------|----|----|---|-------|-------|-------|-------|-------|-------|

---
