# Supplementary material for: Drought stress triggers proteomic changes involving lignin, flavonoids and fatty acids in tea plants
Source: PubMed Central journal article supplement (PMC7511325; doi:10.1038/s41598-020-72596-1), 2020-09-23
Supplement: 41598_2020_72596_MOESM4_ESM.pdf [file 41598_2020_72596_MOESM4_ESM.pdf]

**Drought Stress Triggers the Proteomic Changes Involved in Lignins, Flavonoids and Fatty Acids in Tea Plants**

Honglian Gu<sup>1</sup>, Yu Wang<sup>1</sup>, Hui Xie<sup>1</sup>, Chen Qiu<sup>1</sup>, Shuning Zhang<sup>1</sup>, Jun Xiao<sup>2</sup>, Hongyan Li<sup>3</sup>, Liang Chen<sup>4</sup>, Xinghui Li<sup>5</sup>, Zhaotang Ding<sup>1,4</sup>

<sup>1</sup> Tea Research Institute, Qingdao Agricultural University, Qingdao, Shandong266109, China.

<sup>2</sup> School of Biological Science and Winery Engineering, Taishan University, Taian, Shandong271000, China.

<sup>3</sup> Haiyang fruit technology promotion station, Yantai, Shandong265100, China.

<sup>4</sup> Tea Research Institute, Chinese Academy of Agricultural Sciences, Hangzhou, Zhejiang310008, China.

<sup>5</sup> Tea Research Institute, Nanjing Agricultural University, Nanjing, Jiangsu210095, China.

guhongliantea@163.com (H.G.); wangyutea@163.com (Y.W.); xiehuitea@163.com (H.X.); qiuchentea@163.com (C.Q.); zhangshuningtea@163.com (S.Z.); xiaojun8299@163.com (J.X.); sunmijia0710@163.com (H.L.);

liangchen@tricaas.com (L.C.); lxh@njau.edu.cn (X.L.).

\*Correspondence: dzttea@163.com; Tel: +85-15853260396

**Supplementary Table S4. KEGG enrichment**

| KEGG pathway                                   | Fisher's exact test p value | Protein accession                                | Protein description                                                                | DT/CK Ratio | Regulated Type | DT/CK P value | MW [kDa] | Score  | Coverage [%] | Peptides | PSMs | Unique peptides | CK1   | CK2   | CK3   | DT1   | DT2   | DT3   |
|------------------------------------------------|-----------------------------|--------------------------------------------------|------------------------------------------------------------------------------------|-------------|----------------|---------------|----------|--------|--------------|----------|------|-----------------|-------|-------|-------|-------|-------|-------|
| ath01110 Biosynthesis of secondary metabolites | 0.000275                    | cds.Camellia_sinensis.comp25454_c0_se q1_m.28314 | D: naringenin 2-oxoglutarate 3-dioxygenase [Ziziphus jujuba]" PREDICTE             | 0.41        | Down           | 5.66E-07      | 44.491   | 178.49 | 49.4         | 18       | 49   | 18              | 1.386 | 1.375 | 1.399 | 0.556 | 0.589 | 0.561 |
| ath01110 Biosynthesis of secondary metabolites | 0.000275                    | cds.Camellia_sinensis.comp29812_c0_se q1_m.18555 | D: 4-coumarate-CoA ligase 2-like [Jatropha curcas]" PREDICTE                       | 0.636       | Down           | 0.000662      | 60.204   | 4.0311 | 7.8          | 5        | 5    | 2               | 1.142 | 1.254 | 1.239 | 0.822 | 0.723 | 0.767 |
| ath01110 Biosynthesis of secondary metabolites | 0.000275                    | cds.Camellia_sinensis.comp28142_c0_se q1_m.18076 | D: trans-cinnamate 4-monooxygenase [Jatropha curcas]" PREDICTE                     | 0.578       | Down           | 1.1E-06       | 60.624   | 61.458 | 26.1         | 13       | 20   | 13              | 1.245 | 1.257 | 1.245 | 0.711 | 0.741 | 0.714 |
| ath01110 Biosynthesis of secondary metabolites | 0.000275                    | cds.Camellia_sinensis.comp32592_c3_se q4_m.29222 | D: arogenate dehydratase 3, chloroplastic [Vitis vinifera]" PREDICTE               | 0.583       | Down           | 0.003784      | 45.948   | 3.0291 | 4.3          | 2        | 2    | 1               | 1.331 | 1.137 | 1.271 | 0.663 | 0.842 | 0.675 |
| ath01110 Biosynthesis of secondary metabolites | 0.000275                    | cds.Camellia_sinensis.comp12781_c0_se q1_m.25470 | D: dihydroflavonol-4-reductase-like [Daucus carota subsp. sativus]" PREDICTE       | 0.379       | Down           | 5.31E-08      | 38.694   | 20.965 | 19.6         | 9        | 16   | 9               | 1.433 | 1.386 | 1.417 | 0.53  | 0.54  | 0.534 |
| ath01110 Biosynthesis of secondary metabolites | 0.000275                    | cds.Camellia_sinensis.comp33776_c0_se q1_m.19252 | D: (-)-alpha-terpineol synthase [Vitis vinifera]" PREDICTE                         | 0.505       | Down           | 2.15E-05      | 70.02    | 47.141 | 12.2         | 7        | 10   | 7               | 1.351 | 1.265 | 1.304 | 0.639 | 0.691 | 0.651 |
| ath01110 Biosynthesis of secondary metabolites | 0.000275                    | cds.Camellia_sinensis.comp24298_c0_se q1_m.23229 | D: 3-ketoacyl-CoA synthase 6 [Sesamum indicum]" PREDICTE                           | 0.213       | Down           | 0.006598      | 56.181   | 4.7365 | 4.4          | 2        | 3    | 2               | 1.558 | 1.615 | 1.613 | 0.265 | 0.345 | 0.41  |
| ath01110 Biosynthesis of secondary metabolites | 0.000275                    | cds.Camellia_sinensis.comp32304_c0_se q3_m.11225 | D: phenylalanine ammonia-lyase [Vitis vinifera]" PREDICTE                          | 0.417       | Down           | 1.92E-07      | 77.077   | 118.08 | 37.8         | 25       | 54   | 6               | 1.375 | 1.378 | 1.392 | 0.561 | 0.579 | 0.587 |
| ath01110 Biosynthesis of secondary metabolites | 0.000275                    | cds.Camellia_sinensis.comp34400_c0_se q9_m.12194 | D: granule-bound starch synthase 1, chloroplastic isoform X2 [Theobroma]" PREDICTE | 0.588       | Down           | 4.87E-07      | 67.174   | 39.882 | 21.9         | 12       | 21   | 11              | 1.242 | 1.24  | 1.25  | 0.718 | 0.734 | 0.744 |
| ath01110 Biosynthesis of secondary metabolites | 0.000275                    | cds.Camellia_sinensis.comp23543_c0_se q1_m.33026 | D: cinnamoyl-CoA reductase 1 [Solanum tuberosum]" PREDICTE                         | 0.562       | Down           | 4.89E-07      | 36.641   | 29.051 | 21.3         | 7        | 16   | 7               | 1.264 | 1.283 | 1.25  | 0.716 | 0.719 | 0.699 |
| ath01110 Biosynthesis of secondary metabolites | 0.000275                    | cds.Camellia_sinensis.comp36199_c0_se q1_m.25892 | D: very-long-chain 3-oxoacyl-CoA reductase 1 [Juglans regia]" PREDICTE             | 0.604       | Down           | 0.000562      | 35.595   | 5.1761 | 11.2         | 4        | 4    | 4               | 1.276 | 1.221 | 1.168 | 0.709 | 0.7   | 0.803 |
| ath01110 Biosynthesis of secondary metabolites | 0.000275                    | cds.Camellia_sinensis.comp27225_c0_se q2_m.28877 | D: anthocyanidin reductase [Vitis vinifera]" PREDICTE                              | 0.525       | Down           | 2.24E-06      | 37.459   | 8.2769 | 20.5         | 7        | 18   | 2               | 1.311 | 1.253 | 1.313 | 0.684 | 0.687 | 0.663 |
| ath01110 Biosynthesis of secondary metabolites | 0.000275                    | cds.Camellia_sinensis.comp27225_c0_se q1_m.28449 | D: anthocyanidin reductase [Vitis vinifera]" PREDICTE                              | 0.424       | Down           | 3.32E-06      | 36.273   | 62.198 | 30.3         | 11       | 25   | 6               | 1.404 | 1.342 | 1.365 | 0.559 | 0.608 | 0.576 |

| Gene ID  | Gene Name                             | Accession | Function                                                                                                                                            | Value | Direction | Exp      | Log2   | Log10  | Log2 | Log10 | Log2 | Log10 | Log2  | Log10 | Log2  | Log10 |       |       |
|----------|---------------------------------------|-----------|-----------------------------------------------------------------------------------------------------------------------------------------------------|-------|-----------|----------|--------|--------|------|-------|------|-------|-------|-------|-------|-------|-------|-------|
| ath01110 | Biosynthesis of secondary metabolites | 0.000275  | PREDICTE<br>cds.Camellia_sinensis.s.comp34<br>132_c2_se<br>q2_m.479<br>D: acetyl-CoA<br>carboxylase 1<br>[Theobroma cacao]                          | 0.511 | Down      | 5.66E-07 | 252.94 | 89.799 | 14.8 | 30    | 35   | 30    | 1.296 | 1.316 | 1.3   | 0.677 | 0.649 | 0.673 |
| ath01110 | Biosynthesis of secondary metabolites | 0.000275  | cds.Camellia_sinensis.s.comp34<br>996_c0_se<br>q1_m.190<br>97<br>D: flavonoid<br>3'<br>hydroxylase<br>[Vitis vinifera]                              | 0.538 | Down      | 2.09E-06 | 57.059 | 17.251 | 19.1 | 9     | 14   | 9     | 1.248 | 1.29  | 1.269 | 0.668 | 0.678 | 0.703 |
| ath01110 | Biosynthesis of secondary metabolites | 0.000275  | cds.Camellia_sinensis.s.comp35<br>217_c0_se<br>q1_m.278<br>70<br>D: leucoanthocyanidin<br>dioxygenase<br>[Theobroma cacao]                          | 0.416 | Down      | 8.03E-07 | 40.057 | 51.661 | 24.5 | 7     | 9    | 7     | 1.343 | 1.36  | 1.416 | 0.567 | 0.584 | 0.561 |
| ath01110 | Biosynthesis of secondary metabolites | 0.000275  | cds.Camellia_sinensis.s.comp35<br>217_c0_se<br>q1_m.278<br>70<br>D: PEROXIDASE<br>42<br>[Eucalyptus grandis]                                        | 0.609 | Down      | 2.14E-05 | 37.589 | 27.808 | 24   | 6     | 6    | 6     | 1.202 | 1.251 | 1.235 | 0.749 | 0.773 | 0.725 |
| ath01110 | Biosynthesis of secondary metabolites | 0.000275  | cds.Camellia_sinensis.s.comp31<br>922_c0_se<br>q2_m.268<br>35<br>D: ATP-citrate<br>synthase<br>alpha<br>chain<br>protein 2<br>[Nicotiana attenuata] | 0.554 | Down      | 0.000581 | 48.023 | 1.21   | 10.3 | 5     | 9    | 2     | 1.348 | 1.238 | 1.215 | 0.647 | 0.688 | 0.769 |
| ath01110 | Biosynthesis of secondary metabolites | 0.000275  | cds.Camellia_sinensis.s.comp31<br>295_c0_se<br>q1_m.482<br>7<br>D: 4-coumarate-CoA<br>ligase 2<br>[Theobroma cacao]                                 | 0.432 | Down      | 0.00492  | 61.529 | 11.529 | 4.7  | 3     | 3    | 2     | 1.387 | 1.367 | 1.352 | 0.531 | 0.651 | 0.592 |
| ath01110 | Biosynthesis of secondary metabolites | 0.000275  | cds.Camellia_sinensis.s.comp27<br>350_c0_se<br>q1_m.242<br>60<br>D: chalcone<br>synthase 1<br>[Juglans regia]                                       | 0.35  | Down      | 2.17E-05 | 48.966 | 67.923 | 32.2 | 11    | 35   | 2     | 1.518 | 1.391 | 1.424 | 0.472 | 0.54  | 0.506 |
| ath01110 | Biosynthesis of secondary metabolites | 0.000275  | cds.Camellia_sinensis.s.comp24<br>910_c0_se<br>q1_m.132<br>95<br>D: probable<br>chalcone--<br>flavonone<br>isomerase<br>3 [Prunus mume]             | 0.555 | Down      | 0.000603 | 23.229 | 80.777 | 23.4 | 5     | 10   | 5     | 1.326 | 1.256 | 1.273 | 0.771 | 0.733 | 0.635 |
| ath00941 | Flavonoid biosynthesis                | 1.09E-11  | cds.Camellia_sinensis.s.comp25<br>454_c0_se<br>q1_m.283<br>14<br>D: naringenin<br>2-oxoglutarate 3-dioxygenase<br>[Ziziphus liliubal]               | 0.41  | Down      | 5.66E-07 | 44.491 | 178.49 | 49.4 | 18    | 49   | 18    | 1.386 | 1.375 | 1.399 | 0.556 | 0.589 | 0.561 |
| ath00941 | Flavonoid biosynthesis                | 1.09E-11  | cds.Camellia_sinensis.s.comp27<br>225_c0_se<br>q2_m.288<br>77<br>D: anthocyanidin<br>reductase<br>[Vitis vinifera]                                  | 0.525 | Down      | 2.24E-06 | 37.459 | 8.2769 | 20.5 | 7     | 18   | 2     | 1.311 | 1.253 | 1.313 | 0.684 | 0.687 | 0.663 |
| ath00941 | Flavonoid biosynthesis                | 1.09E-11  | cds.Camellia_sinensis.s.comp28<br>142_c0_se<br>q1_m.180<br>76<br>D: trans-4-monoxygenase<br>[Jatropha curcas]                                       | 0.578 | Down      | 1.1E-06  | 60.624 | 61.458 | 26.1 | 13    | 20   | 13    | 1.245 | 1.257 | 1.245 | 0.711 | 0.741 | 0.714 |
| ath00941 | Flavonoid biosynthesis                | 1.09E-11  | cds.Camellia_sinensis.s.comp27<br>225_c0_se<br>q1_m.284<br>49<br>D: anthocyanidin<br>reductase<br>[Vitis vinifera]                                  | 0.424 | Down      | 3.32E-06 | 36.273 | 62.198 | 30.3 | 11    | 25   | 6     | 1.404 | 1.342 | 1.365 | 0.559 | 0.608 | 0.576 |
| ath00941 | Flavonoid biosynthesis                | 1.09E-11  | cds.Camellia_sinensis.s.comp34<br>996_c0_se<br>q1_m.190<br>97<br>D: flavonoid<br>3'<br>hydroxylase<br>[Vitis vinifera]                              | 0.538 | Down      | 2.09E-06 | 57.059 | 17.251 | 19.1 | 9     | 14   | 9     | 1.248 | 1.29  | 1.269 | 0.668 | 0.678 | 0.703 |
| ath00941 | Flavonoid biosynthesis                | 1.09E-11  | cds.Camellia_sinensis.s.comp35<br>217_c0_se<br>q1_m.278<br>70<br>D: leucoanthocyanidin<br>dioxygenase<br>[Theobroma cacao]                          | 0.416 | Down      | 8.03E-07 | 40.057 | 51.661 | 24.5 | 7     | 9    | 7     | 1.343 | 1.36  | 1.416 | 0.567 | 0.584 | 0.561 |
| ath00941 | Flavonoid biosynthesis                | 1.09E-11  | cds.Camellia_sinensis.s.comp12<br>781_c0_se<br>q1_m.254<br>70<br>D: dihydroflavonol-4-reductase-like<br>[Daucus carota subsp. sativus]              | 0.379 | Down      | 5.31E-08 | 38.694 | 20.965 | 19.6 | 9     | 16   | 9     | 1.433 | 1.386 | 1.417 | 0.53  | 0.54  | 0.534 |
| ath00941 | Flavonoid biosynthesis                | 1.09E-11  | cds.Camellia_sinensis.s.comp27<br>350_c0_se<br>q1_m.242<br>60<br>D: chalcone<br>synthase 1<br>[Juglans regia]                                       | 0.35  | Down      | 2.17E-05 | 48.966 | 67.923 | 32.2 | 11    | 35   | 2     | 1.518 | 1.391 | 1.424 | 0.472 | 0.54  | 0.506 |
| ath00941 | Flavonoid biosynthesis                | 1.09E-11  | cds.Camellia_sinensis.s.comp24<br>910_c0_se<br>q1_m.132<br>95<br>D: probable<br>chalcone--<br>flavonone<br>isomerase<br>3 [Prunus mume]             | 0.555 | Down      | 0.000603 | 23.229 | 80.777 | 23.4 | 5     | 10   | 5     | 1.326 | 1.256 | 1.273 | 0.771 | 0.733 | 0.635 |

| Gene ID  | Gene Name                                           | Accession | Gene Description                                                            | Expression | Direction | Log2FC   | P-value | TPM    | TPM  | TPM | TPM | TPM | TPM   | TPM   | TPM   | TPM   | TPM   | TPM   |
|----------|-----------------------------------------------------|-----------|-----------------------------------------------------------------------------|------------|-----------|----------|---------|--------|------|-----|-----|-----|-------|-------|-------|-------|-------|-------|
| ath00940 | Phenylpropanoid biosynthesis                        | 0.000184  | PREDICTE<br>D: 4-coumarate-CoA ligase 2-like<br>[Jatropha curcas]           | 0.636      | Down      | 0.000662 | 60.204  | 4.0311 | 7.8  | 5   | 5   | 2   | 1.142 | 1.254 | 1.239 | 0.822 | 0.723 | 0.767 |
| ath00940 | Phenylpropanoid biosynthesis                        | 0.000184  | PREDICTE<br>D: cinnamoyl-CoA reductase 1<br>[Solanum tuberosum]             | 0.562      | Down      | 4.89E-07 | 36.641  | 29.051 | 21.3 | 7   | 16  | 7   | 1.264 | 1.283 | 1.25  | 0.716 | 0.719 | 0.699 |
| ath00940 | Phenylpropanoid biosynthesis                        | 0.000184  | PREDICTE<br>D: trans-cinnamate 4-monooxygenase<br>[Jatropha curcas]         | 0.578      | Down      | 1.1E-06  | 60.624  | 61.458 | 26.1 | 13  | 20  | 13  | 1.245 | 1.257 | 1.245 | 0.711 | 0.741 | 0.714 |
| ath00940 | Phenylpropanoid biosynthesis                        | 0.000184  | PREDICTE<br>D: peroxidase 42<br>[Eucalyptus erandis]                        | 0.609      | Down      | 2.14E-05 | 37.589  | 27.808 | 24   | 6   | 6   | 6   | 1.202 | 1.251 | 1.235 | 0.749 | 0.773 | 0.725 |
| ath00940 | Phenylpropanoid biosynthesis                        | 0.000184  | PREDICTE<br>D: 4-coumarate-CoA ligase 2<br>[Theobroma cacao]                | 0.432      | Down      | 0.00492  | 61.529  | 11.529 | 4.7  | 3   | 3   | 2   | 1.387 | 1.367 | 1.352 | 0.531 | 0.651 | 0.592 |
| ath00940 | Phenylpropanoid biosynthesis                        | 0.000184  | PREDICTE<br>D: phenylalanine ammonia-lyase<br>[Vitis]                       | 0.417      | Down      | 1.92E-07 | 77.077  | 118.08 | 37.8 | 25  | 54  | 6   | 1.375 | 1.378 | 1.392 | 0.561 | 0.579 | 0.587 |
| ath00360 | Phenylalanine metabolism                            | 0.000714  | PREDICTE<br>D: 4-coumarate-CoA ligase 2-like<br>[Jatropha curcas]           | 0.636      | Down      | 0.000662 | 60.204  | 4.0311 | 7.8  | 5   | 5   | 2   | 1.142 | 1.254 | 1.239 | 0.822 | 0.723 | 0.767 |
| ath00360 | Phenylalanine metabolism                            | 0.000714  | PREDICTE<br>D: trans-cinnamate 4-monooxygenase<br>[Jatropha curcas]         | 0.578      | Down      | 1.1E-06  | 60.624  | 61.458 | 26.1 | 13  | 20  | 13  | 1.245 | 1.257 | 1.245 | 0.711 | 0.741 | 0.714 |
| ath00360 | Phenylalanine metabolism                            | 0.000714  | PREDICTE<br>D: 4-coumarate-CoA ligase 2<br>[Theobroma cacao]                | 0.432      | Down      | 0.00492  | 61.529  | 11.529 | 4.7  | 3   | 3   | 2   | 1.387 | 1.367 | 1.352 | 0.531 | 0.651 | 0.592 |
| ath00360 | Phenylalanine metabolism                            | 0.000714  | PREDICTE<br>D: phenylalanine ammonia-lyase<br>[Vitis]                       | 0.417      | Down      | 1.92E-07 | 77.077  | 118.08 | 37.8 | 25  | 54  | 6   | 1.375 | 1.378 | 1.392 | 0.561 | 0.579 | 0.587 |
| ath00130 | Ubiquinone and other terpenoid-quinone biosynthesis | 0.004942  | PREDICTE<br>D: 4-coumarate-CoA ligase 2-like<br>[Jatropha curcas]           | 0.636      | Down      | 0.000662 | 60.204  | 4.0311 | 7.8  | 5   | 5   | 2   | 1.142 | 1.254 | 1.239 | 0.822 | 0.723 | 0.767 |
| ath00130 | Ubiquinone and other terpenoid-quinone biosynthesis | 0.004942  | PREDICTE<br>D: trans-cinnamate 4-monooxygenase<br>[Jatropha curcas]         | 0.578      | Down      | 1.1E-06  | 60.624  | 61.458 | 26.1 | 13  | 20  | 13  | 1.245 | 1.257 | 1.245 | 0.711 | 0.741 | 0.714 |
| ath00130 | Ubiquinone and other terpenoid-quinone biosynthesis | 0.004942  | PREDICTE<br>D: 4-coumarate-CoA ligase 2<br>[Theobroma cacao]                | 0.432      | Down      | 0.00492  | 61.529  | 11.529 | 4.7  | 3   | 3   | 2   | 1.387 | 1.367 | 1.352 | 0.531 | 0.651 | 0.592 |
| ath00062 | Fatty acid elongation                               | 0.011215  | PREDICTE<br>D: very-long-chain 3-oxoacyl-CoA reductase 1<br>[Juglans regia] | 0.604      | Down      | 0.000562 | 35.595  | 5.1761 | 11.2 | 4   | 4   | 4   | 1.276 | 1.221 | 1.168 | 0.709 | 0.7   | 0.803 |
| ath00062 | Fatty acid elongation                               | 0.011215  | PREDICTE<br>D: 3-ketoacyl-CoA synthase 6<br>[Sesamum indicum]               | 0.213      | Down      | 0.006598 | 56.181  | 4.7365 | 4.4  | 2   | 3   | 2   | 1.558 | 1.615 | 1.613 | 0.265 | 0.345 | 0.41  |
