# Supplementary material for: Drought stress triggers proteomic changes involving lignin, flavonoids and fatty acids in tea plants
Source: PubMed Central journal article supplement (PMC7511325; doi:10.1038/s41598-020-72596-1), 2020-09-23
Supplement: 41598_2020_72596_MOESM5_ESM.pdf [file 41598_2020_72596_MOESM5_ESM.pdf]

Drought Stress Triggers the Proteomic Changes Involved in Lipid, Flavonoid and Fatty Acids in Tea Plants  
 Honglan Gu<sup>1</sup>, Ye Wang<sup>1</sup>, Hai Xie<sup>1</sup>, Chen Qu<sup>1</sup>, Shuang Zhang<sup>1</sup>, Jun Xiao<sup>2</sup>, Hongyan Li<sup>1</sup>, Liang Chen<sup>1</sup>, Xinghai Li<sup>1</sup>, Zhaotang Deng<sup>1,3</sup>  
 1 Tea Research Institute, Qingdao Agricultural University, Qingdao, Shandong 266109, China.  
 2 School of Biological Science and Winery Engineering, Taishan University, Taian, Shandong 271000, China.  
 3 Haiyang fruit technology promotion station, Yantai, Shandong 265110, China.  
 4 Tea Research Institute, Chinese Academy of Agricultural Sciences, Hangzhou, Zhejiang 310008, China.  
 5 Tea Research Institute, Nanjing Agricultural University, Nanjing, Jiangsu 210095, China.  
 E-mail: honglan@163.com (H.G.); wangye@163.com (Y.W.); xiehai@163.com (H.X.); chenqu@163.com (C.Q.); zhangshuang@163.com (S.Z.); xiaojun@163.com (J.X.); sunmingji@163.com (H.L.); liangchen@caas.com (L.C.); hb@njau.edu.cn (X.L.).  
 \*Correspondence: dengzt@163.com; Tel: +86-15853263936

Supplementary Table S1. Protein-protein interaction network

| String name | Protein                                                    | Regulation | FS Ratio | Average <sup>1</sup> Betweenness Centrality | Closest Neighbor | Cluster Coefficient | Degree   | Eccentricity | Neighbor hood | Number of Edges | Radiality | Stress    | Topology | Subcellular localization | Biological Process | Cellular Component                                                                                                                                                                                                                                                                                                                                                                                                                                                                                                                                                                                                                                                                                                                                                                                                                                                                                                                                                                                                 | Molecular Function                                                                                                                                                                                                                                                                                                                                                                                                                             | KEGG KO No.                                                                                                                                                                                                                                                | KEGG Gene | KEGG pathway                                  | IPR ID                                                                                                                                   | Domain description                                                                                                                              |
|-------------|------------------------------------------------------------|------------|----------|---------------------------------------------|------------------|---------------------|----------|--------------|---------------|-----------------|-----------|-----------|----------|--------------------------|--------------------|--------------------------------------------------------------------------------------------------------------------------------------------------------------------------------------------------------------------------------------------------------------------------------------------------------------------------------------------------------------------------------------------------------------------------------------------------------------------------------------------------------------------------------------------------------------------------------------------------------------------------------------------------------------------------------------------------------------------------------------------------------------------------------------------------------------------------------------------------------------------------------------------------------------------------------------------------------------------------------------------------------------------|------------------------------------------------------------------------------------------------------------------------------------------------------------------------------------------------------------------------------------------------------------------------------------------------------------------------------------------------------------------------------------------------------------------------------------------------|------------------------------------------------------------------------------------------------------------------------------------------------------------------------------------------------------------------------------------------------------------|-----------|-----------------------------------------------|------------------------------------------------------------------------------------------------------------------------------------------|-------------------------------------------------------------------------------------------------------------------------------------------------|
| AT4G0800    | cds_Can01<br>la_000436<br>comp2491<br>l_05_seq1<br>_m_3838 | Down       | 0.679    | 1                                           | 0.183333         | 1                   | 0.666667 | 6            | 1             | 6               | 0         | 1         | 10       | 0.722222                 | cytoplasm          | GO:000518 peptide metabolic process; GO:0043043 peptide biosynthetic process; GO:0044287 cellular protein metabolic process; GO:0008087 nitrogen compound metabolic process; GO:0009058 biosynthetic process; GO:0043693 cellular amide metabolic process; GO:0044238 primary metabolic process; GO:190156 organotriazine compound biosynthetic process; GO:0044237 cellular metabolic process; GO:0044249 cellular biosynthetic process; GO:0071704 organic substance metabolic process; GO:0008152 metabolic process; GO:004217 cellular nitrogen compound biosynthetic process; GO:0053465 cellular macromolecule biosynthetic process; GO:0043461 cellular nitrogen compound metabolic process; GO:0010467 gene expression; GO:0043170 macromolecule metabolic process; GO:0043694 amide biosynthetic process; GO:0019538 protein metabolic process; GO:0006412 translation; GO:0009099 macromolecule biosynthetic process; GO:0009787 cellular process; GO:1901564 organonitrogen compound metabolic process; | GO:0005840 ribosome; GO:0043228 organelle; GO:0043229 intracellular organelle; GO:0043232 intracellular non-membrane-bounded organelle; GO:0044464 cell part; GO:0005277 cytoplasm; GO:0032991 macromolecular complex; GO:0005779 ribosome; GO:1906904 part; GO:1906904 ribonucleoprotein complex; GO:0005623 cell; GO:003529 intracellular ribonucleoprotein complex; GO:0044444 cytoplasmic part; GO:0043228 non-membrane-bounded organelle; | GO:0003735 structural constituent of ribosome; GO:0005198 structural molecule activity;                                                                                                                                                                    | K2890     | RP-S11e; small subunit ribosomal protein S11e | at00300 Ribosome (thale cress);                                                                                                          | IPR021540 : OH-fold 485<br>IPR021440 : ribosomal protein S11; N-terminal                                                                        |
| AT3G2560    | cds_Can01<br>la_000436<br>comp1171<br>l_05_seq1<br>_m_3729 | Down       | 0.679    | 1.166667                                    | 0.016667         | 0.871429            | 0.9      | 5            | 2             | 5               | 0         | 0.916667  | 2        | 0.833333                 | chloroplast        | GO:000518 peptide metabolic process; GO:0043043 peptide biosynthetic process; GO:0044287 cellular protein metabolic process; GO:0008087 nitrogen compound metabolic process; GO:0009058 biosynthetic process; GO:0043693 cellular amide metabolic process; GO:0044238 primary metabolic process; GO:190156 organotriazine compound biosynthetic process; GO:0044237 cellular metabolic process; GO:0044249 cellular biosynthetic process; GO:0071704 organic substance metabolic process; GO:0008152 metabolic process; GO:004217 cellular nitrogen compound biosynthetic process; GO:0053465 cellular macromolecule biosynthetic process; GO:0043461 cellular nitrogen compound metabolic process; GO:0010467 gene expression; GO:0043170 macromolecule metabolic process; GO:0043694 amide biosynthetic process; GO:0019538 protein metabolic process; GO:0006412 translation; GO:0009099 macromolecule biosynthetic process; GO:0009787 cellular process; GO:1901564 organonitrogen compound metabolic process; | GO:0005840 ribosome; GO:0043228 organelle; GO:0043229 intracellular organelle; GO:0043232 intracellular non-membrane-bounded organelle; GO:0044464 cell part; GO:0005277 cytoplasm; GO:0032991 macromolecular complex; GO:0005779 ribosome; GO:1906904 part; GO:1906904 ribonucleoprotein complex; GO:0005623 cell; GO:003529 intracellular ribonucleoprotein complex; GO:0044444 cytoplasmic part; GO:0043228 non-membrane-bounded organelle; | GO:0003735 structural constituent of ribosome; GO:0005198 structural molecule activity;                                                                                                                                                                    | K2993     | RP-S7c; small subunit ribosomal protein S7c   | at00300 Ribosome (thale cress);                                                                                                          |                                                                                                                                                 |
| AT5G0510    | cds_Can01<br>la_000436<br>comp2544<br>l_05_seq1<br>_m_4078 | Down       | 0.649    | 1.166667                                    | 0.016667         | 0.871429            | 0.9      | 5            | 2             | 5               | 0         | 0.916667  | 2        | 0.833333                 | cytoplasm          | GO:000518 peptide metabolic process; GO:0043043 peptide biosynthetic process; GO:0044287 cellular protein metabolic process; GO:0008087 nitrogen compound metabolic process; GO:0009058 biosynthetic process; GO:0043693 cellular amide metabolic process; GO:0044238 primary metabolic process; GO:190156 organotriazine compound biosynthetic process; GO:0044237 cellular metabolic process; GO:0044249 cellular biosynthetic process; GO:0071704 organic substance metabolic process; GO:0008152 metabolic process; GO:004217 cellular nitrogen compound biosynthetic process; GO:0053465 cellular macromolecule biosynthetic process; GO:0043461 cellular nitrogen compound metabolic process; GO:0010467 gene expression; GO:0043170 macromolecule metabolic process; GO:0043694 amide biosynthetic process; GO:0019538 protein metabolic process; GO:0006412 translation; GO:0009099 macromolecule biosynthetic process; GO:0009787 cellular process; GO:1901564 organonitrogen compound metabolic process; | GO:0005840 ribosome; GO:0043229 intracellular organelle; GO:0043232 intracellular non-membrane-bounded organelle; GO:0044464 cell part; GO:0005277 cytoplasm; GO:0032991 macromolecular complex; GO:0005779 ribosome; GO:1906904 part; GO:1906904 ribonucleoprotein complex; GO:0005623 cell; GO:003529 intracellular ribonucleoprotein complex; GO:0044444 cytoplasmic part; GO:0043228 non-membrane-bounded organelle;                       | GO:0007139 organic cyclic compound binding; GO:0001828 heterocyclic compound binding; GO:0007323 RNA binding; GO:0005488 binding; GO:0003024 nucleic acid binding; GO:0005738 structural molecule activity; GO:0003735 structural constituent of ribosome; | K2956     | RP-S15c; small subunit ribosomal protein S15c | at00300 Ribosome (thale cress); Arabidopsis thaliana (thale cress);                                                                      | IPR021575 : S19, repeat domain<br>IPR021443 : Oxytetracycline resistance protein Y<br>IPR020992 : SecY domain<br>IPR021575 : S19, repeat domain |
| FL51        | cds_Can01<br>la_000436<br>comp2501<br>l_05_seq1<br>_m_3934 | Down       | 0.44     | 1.602307                                    | 0.0308303        | 0.5909091           | 0.8      | 6            | 3             | 6               | 0         | 0.861538  | 26       | 0.575757                 | cytoplasm          | GO:004499 single-organism process; GO:0008152 metabolic process; GO:0005114 oxidation-reduction process; GO:0044710 single-organism metabolic process;                                                                                                                                                                                                                                                                                                                                                                                                                                                                                                                                                                                                                                                                                                                                                                                                                                                             | GO:0003824 catalytic activity; GO:0004949 oxidoreductase activity;                                                                                                                                                                                                                                                                                                                                                                             |                                                                                                                                                                                                                                                            |           |                                               | IPR005123 : secY domain<br>IPR021443 : Oxytetracycline resistance protein Y<br>IPR020992 : SecY domain<br>IPR021575 : S19, repeat domain |                                                                                                                                                 |
| FBI         | cds_Can01<br>la_000436<br>comp2545<br>l_05_seq1<br>_m_3914 | Down       | 0.41     | 1.538461                                    | 0.171859         | 0.65                | 0.666667 | 7            | 3             | 7               | 0         | 0.802707  | 78       | 0.488952                 | cytoplasm          | GO:004499 single-organism process; GO:0008152 metabolic process; GO:0005114 oxidation-reduction process; GO:0044710 single-organism metabolic process;                                                                                                                                                                                                                                                                                                                                                                                                                                                                                                                                                                                                                                                                                                                                                                                                                                                             | GO:0003824 catalytic activity; GO:0004949 oxidoreductase activity;                                                                                                                                                                                                                                                                                                                                                                             |                                                                                                                                                                                                                                                            |           |                                               | IPR021443 : Oxytetracycline resistance protein Y<br>IPR020992 : SecY domain<br>IPR021575 : S19, repeat domain                            |                                                                                                                                                 |
| CHL         | cds_Can01<br>la_000436<br>comp2491<br>l_05_seq1<br>_m_3829 | Down       | 0.55     | 1.402307                                    | 0.0308303        | 0.5909091           | 0.8      | 6            | 3             | 6               | 0         | 0.861538  | 26       | 0.575757                 | cytoplasm          | GO:0008152 metabolic process; GO:0009058 biosynthetic process; GO:0009013 flavonoid biosynthetic process; GO:0009012 flavonoid biosynthetic process; GO:190156 organic substance biosynthetic process; GO:0071704 organic substance metabolic process;                                                                                                                                                                                                                                                                                                                                                                                                                                                                                                                                                                                                                                                                                                                                                             | GO:0010772 intracellular lysis activity; GO:0045430 chalcone isomerase activity; GO:0046853 isomerase activity; GO:0003824 catalytic activity;                                                                                                                                                                                                                                                                                                 |                                                                                                                                                                                                                                                            |           |                                               | IPR016008 : isomerase<br>IPR016087 : Chalcone isomerase<br>IPR021575 : S19, repeat domain                                                |                                                                                                                                                 |
| TT4         | cds_Can01<br>la_000436<br>comp2735<br>l_05_seq1<br>_m_4240 | Down       | 0.35     | 1.461538                                    | 0.310192         | 0.6842105           | 0.428714 | 8            | 3             | 8               | 0         | 0.9070923 | 134      | 0.447914                 | chloroplast        | GO:0009058 biosynthetic process; GO:0008152 metabolic process;                                                                                                                                                                                                                                                                                                                                                                                                                                                                                                                                                                                                                                                                                                                                                                                                                                                                                                                                                     | GO:0016748 transferase activity, transferring xyl groups; GO:0003824 catalytic activity; GO:0006740 transferase activity;                                                                                                                                                                                                                                                                                                                      |                                                                                                                                                                                                                                                            |           |                                               | IPR010999 : N-terminal Thioesterase<br>IPR012528 : Chalcone synthase<br>IPR021575 : S19, repeat domain                                   |                                                                                                                                                 |
| AT1G7661    | cds_Can01<br>la_000436<br>comp2810<br>l_05_seq1<br>_m_4091 | Down       | 0.69     | 1.166667                                    | 0.016667         | 0.871429            | 0.9      | 5            | 2             | 5               | 0         | 0.916667  | 2        | 0.833333                 | cytoplasm          | GO:000518 peptide metabolic process; GO:0043043 peptide biosynthetic process; GO:0044287 cellular protein metabolic process; GO:0008087 nitrogen compound metabolic process; GO:0009058 biosynthetic process; GO:0043693 cellular amide metabolic process; GO:0044238 primary metabolic process; GO:190156 organotriazine compound biosynthetic process; GO:0044237 cellular metabolic process; GO:0044249 cellular biosynthetic process; GO:0071704 organic substance metabolic process; GO:0008152 metabolic process; GO:004217 cellular nitrogen compound biosynthetic process; GO:0053465 cellular macromolecule biosynthetic process; GO:0043461 cellular nitrogen compound metabolic process; GO:0010467 gene expression; GO:0043170 macromolecule metabolic process; GO:0043694 amide biosynthetic process; GO:0019538 protein metabolic process; GO:0006412 translation; GO:0009099 macromolecule biosynthetic process; GO:0009787 cellular process; GO:1901564 organonitrogen compound metabolic process; | GO:0005840 ribosome; GO:0043228 organelle; GO:0043229 intracellular organelle; GO:0043232 intracellular non-membrane-bounded organelle; GO:0044464 cell part; GO:0005277 cytoplasm; GO:0032991 macromolecular complex; GO:0005779 ribosome; GO:1906904 part; GO:1906904 ribonucleoprotein complex; GO:0005623 cell; GO:003529 intracellular ribonucleoprotein complex; GO:0044444 cytoplasmic part; GO:0043228 non-membrane-bounded organelle; | GO:0003735 structural constituent of ribosome; GO:0005198 structural molecule activity;                                                                                                                                                                    | K2889     | RP-L2c; large subunit ribosomal protein L2c   | at00300 Ribosome (thale cress); Arabidopsis thaliana (thale cress);                                                                      | IPR020991 : Translato domain<br>IPR021575 : S19, repeat domain                                                                                  |
| PA11        | cds_Can01<br>la_000436<br>comp2655<br>l_05_seq1<br>_m_4630 | Down       | 0.382    | 2.0769231                                   | 0.0271399        | 0.4814815           | 0.666667 | 4            | 4             | 4               | 0         | 0.7846154 | 20       | 0.5277778                | cytoplasm          |                                                                                                                                                                                                                                                                                                                                                                                                                                                                                                                                                                                                                                                                                                                                                                                                                                                                                                                                                                                                                    | GO:0003824 catalytic activity;                                                                                                                                                                                                                                                                                                                                                                                                                 |                                                                                                                                                                                                                                                            |           |                                               | IPR014083 : N-terminal L-lysine<br>IPR020948 : L-lysine                                                                                  |                                                                                                                                                 |
